# Supplementary material for: An improved epigenetic counter to track mitotic age in normal and precancerous tissues
Source: Nat Commun. 2024 May 17;15:4211. doi: 10.1038/s41467-024-48649-8 (PMC11101651; doi:10.1038/s41467-024-48649-8)
Supplement: Supplementary file 4 — Supplementary Data 1–21 [file 41467_2024_48649_MOESM4_ESM.xlsx]

## Sheet: SuppData1
Supplementary Data 1: Probe ID, chromosome, position, mapped gene(s) and regulatory region of 371 stemTOC CpGs
ProbeID	Chr	Pos	UCSC_RefGene_Name	UCSC_RefGene_Group
cg23062112	chr11	26353630	ANO3	TSS200
cg07365816	chr3	153839000	SGEF	TSS200
cg08659394	chr16	67184918	B3GNT9	TSS200
cg14575559	chr19	18111766	ARRDC2	TSS200
cg18560328	chr11	7273148	SYT9	TSS200
cg21229268	chr21	34442350	OLIG1	TSS200
cg23091824	chr5	1112355	SLC12A7	TSS200
cg03865257	chr18	21269410	LAMA3;LAMA3	TSS200;TSS200
cg11250773	chr22	44288021	PNPLA5	TSS200
cg12892303	chr17	42733592	C17orf104	TSS200
cg12781700	chr17	42733729	C17orf104	TSS200
cg13583934	chr6	39197256	KCNK5	TSS200
cg12065366	chr3	238618	CHL1	TSS200
cg25203031	chr1	66999813	SGIP1	TSS200
cg17404915	chr20	18038574	OVOL2	TSS200
cg22299454	chr4	165304443	MARCH1	TSS200
cg05404701	chr12	80084977	PAWR	TSS200
cg24010885	chr20	30102097	HM13;HM13;HM13;HM13	TSS200;TSS200;TSS200;TSS200
cg17712694	chr5	16180068	MARCH11	TSS200
cg20707222	chr1	76540222	ST6GALNAC3;ST6GALNAC3	TSS200;TSS200
cg11297107	chr19	38924319	RYR1;RYR1	TSS200;TSS200
cg12799781	chr17	12569110	MYOCD;MYOCD	TSS200;TSS200
cg01718742	chr16	62070184	CDH8	TSS200
cg10263370	chr3	44754102	ZNF502;ZNF502;ZNF502;ZNF502	TSS200;TSS200;TSS200;TSS200
cg15774465	chr8	73449524	KCNB2	TSS200
cg16491617	chr8	54164391	OPRK1	TSS200
cg11832210	chr10	91295346	SLC16A12	TSS200
cg07686635	chr19	53696642	ZNF665	TSS200
cg26510017	chr12	39299546	CPNE8	TSS200
cg15745900	chr8	68864549	PREX2;PREX2	TSS200;TSS200
cg15402399	chr13	46189899	FAM194B	TSS200
cg06963053	chr2	182545533	NEUROD1	TSS200
cg05009934	chr6	123317411	CLVS2	TSS200
cg10094616	chr8	53478023	FAM150A	TSS200
cg06010588	chr8	35092876	UNC5D	TSS200
cg23847712	chr4	9783196	DRD5	TSS200
cg17370163	chr5	63461654	RNF180;RNF180	TSS200;TSS200
cg13428480	chr1	160370208	VANGL2	TSS200
cg22620221	chr7	153584416	DPP6	TSS200
cg22319311	chr8	98290310	TSPYL5	TSS200
cg16437728	chr11	7273046	SYT9	TSS200
cg25984671	chr20	591083	TCF15	TSS200
cg07882671	chr5	1883005	IRX4	TSS200
cg04342955	chr16	12995296	SHISA9;SHISA9	TSS200;TSS200
cg15759616	chr19	8274049	LASS4	TSS200
cg07624639	chr13	28494002	PDX1	TSS200
cg14482313	chr12	52626889	KRT7	TSS200
cg14537533	chr12	52626904	KRT7	TSS200
cg10755973	chr9	126773879	LHX2	TSS200
cg10527010	chr3	10857795	SLC6A11	TSS200
cg02119363	chr3	179754603	PEX5L	TSS200
cg26417642	chr11	2466095	KCNQ1	TSS200
cg10496082	chr15	45422083	DUOX1;DUOX1;DUOXA1	TSS200;TSS200;TSS200
cg07688490	chr11	129685695	TMEM45B	TSS200
cg09608387	chr6	150464020	PPP1R14C	TSS200
cg02044219	chr4	25032562	LGI2	TSS200
cg24205332	chr11	130298700	ADAMTS8	TSS200
cg24456663	chr19	15619329	CYP4F22	TSS200
cg12805420	chr17	7165840	CLDN7	TSS200
cg22604123	chr1	32930522	ZBTB8B	TSS200
cg14866200	chr4	42399843	SHISA3	TSS200
cg13786089	chr19	3869086	ZFR2;ZFR2;ZFR2	TSS200;TSS200;TSS200
cg03414321	chr20	30640022	HCK	TSS200
cg26296488	chr4	9783192	DRD5	TSS200
cg20905516	chr11	106889364	GUCY1A2	TSS200
cg04633600	chr5	101632286	SLCO4C1	TSS200
cg05471845	chr3	42306467	CCK	TSS200
cg10182317	chr6	123317487	CLVS2	TSS200
cg08712932	chr6	133562463	EYA4;EYA4;EYA4	TSS200;TSS200;TSS200
cg22376706	chr12	71314612	PTPRR	TSS200
cg11342468	chr12	103889784	C12orf42;C12orf42	TSS200;TSS200
cg16150752	chr5	16180072	MARCH11	TSS200
cg24213507	chr3	6902689	GRM7;GRM7	TSS200;TSS200
cg25143824	chr20	9819820	PAK7;PAK7	TSS200;TSS200
cg11345323	chr1	1981825	PRKCZ	TSS200
cg06911020	chr3	39851123	MYRIP	TSS200
cg03817667	chr7	54609953	VSTM2A	TSS200
cg04474990	chr3	43020703	FAM198A	TSS200
cg14558114	chr2	88469736	THNSL2	TSS200
cg22714094	chr4	164253820	NPY1R	TSS200
cg09022422	chr3	10857798	SLC6A11	TSS200
cg02330121	chr6	118228514	SLC35F1	TSS200
cg02196294	chr6	39197260	KCNK5	TSS200
cg02501827	chr11	11862879	USP47	TSS200
cg12075445	chr12	132906010	GALNT9	TSS200
cg14630839	chr22	50919823	ADM2	TSS200
cg24092470	chr20	62289557	RTEL1;RTEL1	TSS200;TSS200
cg03045425	chr18	31803633	NOL4	TSS200
cg17991436	chr6	117198281	RFX6	TSS200
cg17683390	chr7	73184622	CLDN3	TSS200
cg15180867	chr20	591076	TCF15	TSS200
cg18102575	chr5	173472717	HMP19	TSS200
cg21923442	chr11	30607993	MPPED2	TSS200
cg13845982	chr20	61051029	GATA5	TSS200
cg01666600	chr17	21279561	KCNJ12	TSS200
cg00804628	chr2	139537845	NXPH2	TSS200
cg18349138	chr21	19617138	CHODL	TSS200
cg26682094	chr1	50489714	AGBL4	TSS200
cg05248618	chr17	58227267	CA4	TSS200
cg07721203	chr15	58357922	ALDH1A2;ALDH1A2	TSS200;TSS200
cg07599133	chr19	35068628	LOC643719	TSS200
cg13171890	chr6	124124882	NKAIN2	TSS200
cg20712058	chr3	126243125	CHST13	TSS200
cg02199397	chr16	3068315	CLDN6	TSS200
cg26970841	chr16	85932666	IRF8	TSS200
cg05758434	chr2	207139471	ZDBF2	TSS200
cg01715455	chr20	25062827	VSX1;VSX1	TSS200;TSS200
cg00865356	chr4	91048559	FAM190A	TSS200
cg26896155	chr4	91048567	FAM190A	TSS200
cg05684406	chr22	21386914	SLC7A4	TSS200
cg18920423	chr10	23481389	PTF1A	TSS200
cg09683824	chr1	179712191	FAM163A	TSS200
cg26084529	chr4	155664993	LRAT	TSS200
cg12518442	chr20	55841906	BMP7	TSS200
cg26844246	chr5	170736277	TLX3	TSS200
cg05804220	chr15	45422062	DUOX1;DUOX1;DUOXA1	TSS200;TSS200;TSS200
cg08919494	chr8	61194111	CA8	TSS200
cg01859739	chr19	58739986	ZNF544	TSS200
cg12882697	chr5	1445549	SLC6A3	TSS200
cg22534145	chr20	23015936	SSTR4	TSS200
cg14817655	chr4	188916724	ZFP42	TSS200
cg13405783	chr8	54164296	OPRK1	TSS200
cg10784386	chr5	79330943	THBS4	TSS200
cg07830652	chr13	76123904	UCHL3	TSS200
cg22832061	chr14	34420413	EGLN3	TSS200
cg08593261	chr4	85419494	NKX6-1	TSS200
cg14015441	chr8	105479318	DPYS	TSS200
cg04847920	chr17	31254859	TMEM98;TMEM98	TSS200;TSS200
cg21349637	chr18	13218607	C18orf1;C18orf1	TSS200;TSS200
cg24374738	chr2	219858146	CRYBA2;CRYBA2;CRYBA2	TSS200;TSS200;TSS200
cg24089118	chr14	52734251	PTGDR	TSS200
cg22014661	chr6	62996130	KHDRBS2	TSS200
cg10315231	chr3	89156568	EPHA3;EPHA3	TSS200;TSS200
cg16563230	chr1	4714991	AJAP1;AJAP1	TSS200;TSS200
cg07967679	chr12	52626814	KRT7	TSS200
cg27414233	chr4	84457458	AGPAT9	TSS200
cg04894619	chr3	179754615	PEX5L	TSS200
cg22600043	chr8	109095991	RSPO2	TSS200
cg15987088	chr3	172166234	GHSR;GHSR	TSS200;TSS200
cg01187505	chr11	26353622	ANO3	TSS200
cg16246961	chr19	58459139	ZNF256	TSS200
cg14138050	chr9	14693504	ZDHHC21	TSS200
cg06157334	chr2	219724539	WNT6	TSS200
cg12253830	chr12	22487668	ST8SIA1	TSS200
cg20354430	chr17	6735116	TEKT1	TSS200
cg09721739	chr3	139396924	NMNAT3	TSS200
cg25682299	chr13	79177886	POU4F1	TSS200
cg24900370	chr6	147830025	SAMD5	TSS200
cg17688525	chr18	6414978	L3MBTL4	TSS200
cg11723848	chr4	96470286	UNC5C	TSS200
cg16400794	chr1	27709850	CD164L2	TSS200
cg18718634	chr11	118023765	SCN4B;SCN4B	TSS200;TSS200
cg11036833	chr5	115152494	CDO1	TSS200
cg01678172	chr14	59932146	GPR135	TSS200
cg06614469	chr18	48086302	MAPK4	TSS200
cg16405637	chr4	42399703	SHISA3	TSS200
cg11338121	chr7	95225986	PDK4	TSS200
cg13900348	chr5	76114646	F2RL1	TSS200
cg01457143	chr19	52599190	ZNF841	TSS200
cg02423064	chr17	32484008	ACCN1	TSS200
cg09768093	chr1	32930511	ZBTB8B	TSS200
cg03132166	chr22	40390753	FAM83F	TSS200
cg07811644	chr6	24126310	NRSN1	TSS200
cg20101352	chr7	29186234	CPVL;CPVL	TSS200;TSS200
cg26541867	chr4	37246688	KIAA1239	TSS200
cg15746696	chr19	58400494	ZNF814	TSS200
cg07516252	chr14	24641201	REC8;REC8	TSS200;TSS200
cg07055993	chr15	54051901	WDR72	TSS200
cg04745161	chr12	130526916	LOC100190940	TSS200
cg16027761	chr13	53422871	PCDH8;PCDH8	TSS200;TSS200
cg06730723	chr10	1779819	ADARB2	TSS200
cg06643298	chr4	8582101	GPR78	TSS200
cg23437459	chr10	124907457	HMX2	TSS200
cg09736162	chr3	48700443	CELSR3	TSS200
cg14546394	chr8	72756863	MSC	TSS200
cg26384430	chr4	156129655	NPY2R	TSS200
cg23339342	chr5	159739701	CCNJL	TSS200
cg11258943	chr9	100615357	FOXE1	TSS200
cg05740609	chr2	45168921	SIX3	TSS200
cg16433156	chr18	76740091	SALL3	TSS200
cg07152098	chr2	95831024	ZNF2;ZNF2	TSS200;TSS200
cg09408768	chr2	155555053	KCNJ3	TSS200
cg12573071	chr3	134370015	KY	TSS200
cg01049530	chr4	81952008	BMP3	TSS200
cg22717227	chr10	50887568	C10orf53;C10orf53	TSS200;TSS200
cg05890484	chr5	78407552	BHMT	TSS200
cg10291141	chr6	18123024	NHLRC1	TSS200
cg26363196	chr1	76540236	ST6GALNAC3;ST6GALNAC3	TSS200;TSS200
cg04621020	chr5	101632341	SLCO4C1	TSS200
cg24083469	chr12	85673879	ALX1	TSS200
cg07650252	chr4	44450870	KCTD8	TSS200
cg06215457	chr13	46190028	FAM194B	TSS200
cg19042459	chr18	49866371	DCC	TSS200
cg27335600	chr3	53528857	CACNA1D;CACNA1D;CACNA1D	TSS200;TSS200;TSS200
cg20532370	chr3	139258730	RBP1;RBP1;RBP1	TSS200;TSS200;TSS200
cg25154916	chr1	233749666	KCNK1	TSS200
cg10662093	chr19	38747234	PPP1R14A	TSS200
cg19430430	chr19	10121323	COL5A3	TSS200
cg25307074	chr14	104551867	ASPG	TSS200
cg01937650	chr8	75896836	CRISPLD1	TSS200
cg25367352	chr4	94750061	ATOH1	TSS200
cg21523251	chr4	8582110	GPR78	TSS200
cg15600488	chr8	17271119	MTMR7	TSS200
cg07624600	chr11	3663644	ART5;ART5	TSS200;TSS200
cg02106223	chr4	185940019	HELT	TSS200
cg03431846	chr14	24641183	REC8;REC8	TSS200;TSS200
cg05486213	chr11	30607950	MPPED2	TSS200
cg04431946	chr2	47797569	KCNK12	TSS200
cg24296626	chr13	25746012	FAM123A;FAM123A	TSS200;TSS200
cg03032214	chr18	74961809	GALR1	TSS200
cg08620606	chr19	40005611	SELV	TSS200
cg23881204	chr8	17434521	PDGFRL	TSS200
cg10202457	chr1	183387751	NMNAT2	TSS200
cg02583525	chr2	26624612	C2orf39	TSS200
cg04083234	chr6	157745348	C6orf35	TSS200
cg21756465	chr2	172543834	DYNC1I2	TSS200
cg24497836	chr15	48470678	MYEF2	TSS200
cg03169767	chr3	190580595	LOC647309	TSS200
cg15766075	chr2	241497417	ANKMY1;ANKMY1	TSS200;TSS200
cg08322034	chr6	80657412	ELOVL4	TSS200
cg24348705	chr6	71666809	B3GAT2	TSS200
cg19221545	chr10	103603812	KCNIP2;KCNIP2;KCNIP2;KCNIP2;KCNIP2;KCNIP2	TSS200;TSS200;TSS200;TSS200;TSS200;TSS200
cg04287116	chr2	95831031	ZNF2;ZNF2	TSS200;TSS200
cg00289429	chr11	17498619	ABCC8	TSS200
cg22445256	chr19	46105602	GPR4	TSS200
cg10989897	chr1	50513645	ELAVL4	TSS200
cg01493016	chr4	25657403	SLC34A2	TSS200
cg20077155	chr4	77172699	FAM47E	TSS200
cg15124757	chr2	17699904	RAD51AP2	TSS200
cg15279950	chr20	36531412	VSTM2L	TSS200
cg10591652	chr5	167956414	FBLL1	TSS200
cg09668400	chr13	26625325	SHISA2	TSS200
cg07846081	chr3	131754018	CPNE4	TSS200
cg21609339	chr20	44650270	SLC12A5	TSS200
cg22791632	chr19	12075848	ZNF763	TSS200
cg01491219	chr1	220863513	C1orf115	TSS200
cg22951509	chr5	94955893	GPR150	TSS200
cg09461185	chr1	186649631	PTGS2	TSS200
cg13666729	chr1	32930473	ZBTB8B	TSS200
cg11905007	chr3	62861071	CADPS;CADPS;CADPS	TSS200;TSS200;TSS200
cg11631518	chr12	75603585	KCNC2;KCNC2;KCNC2	TSS200;TSS200;TSS200
cg08270223	chr5	178322770	ZFP2	TSS200
cg04812484	chr13	46189935	FAM194B	TSS200
cg10395685	chr11	86085715	CCDC81;CCDC81	TSS200;TSS200
cg16910830	chr7	145813437	CNTNAP2	TSS200
cg09275869	chr18	44337099	ST8SIA5	TSS200
cg25705900	chr2	7057402	RNF144A	TSS200
cg23655107	chr14	95236568	GSC	TSS200
cg12091542	chr3	48700425	CELSR3	TSS200
cg05331082	chr3	139396852	NMNAT3	TSS200
cg26424556	chr16	23313508	SCNN1B	TSS200
cg20185609	chr13	28543446	CDX2	TSS200
cg23455602	chr4	115519578	UGT8	TSS200
cg21838979	chr2	106681945	C2orf40	TSS200
cg02590345	chr9	103790959	LPPR1	TSS200
cg14589466	chr17	9548894	USP43	TSS200
cg26554592	chr10	108924398	SORCS1;SORCS1	TSS200;TSS200
cg14013195	chr2	26624767	C2orf39	TSS200
cg27631427	chr18	47088306	LIPG	TSS200
cg01613638	chr14	62584024	FLJ43390	TSS200
cg11238048	chr6	168720487	DACT2	TSS200
cg16649052	chr20	30555644	XKR7	TSS200
cg19523082	chr10	23216841	ARMC3	TSS200
cg22667178	chr13	44947976	SERP2	TSS200
cg07989568	chr17	6735152	TEKT1	TSS200
cg26836233	chr3	10857800	SLC6A11	TSS200
cg05742308	chr7	83824384	SEMA3A	TSS200
cg02490516	chr8	53478102	FAM150A	TSS200
cg05639405	chr3	126243044	CHST13	TSS200
cg00457913	chr6	48036603	C6orf138	TSS200
cg21444693	chr19	58446787	ZNF418	TSS200
cg18678353	chr11	18813484	PTPN5;PTPN5;PTPN5	TSS200;TSS200;TSS200
cg02622052	chr12	41086274	CNTN1;CNTN1	TSS200;TSS200
cg00181968	chr1	179712204	FAM163A	TSS200
cg21461649	chr7	117119938	CFTR	TSS200
cg02841941	chr3	152552615	P2RY1	TSS200
cg11868900	chr8	49648035	EFCAB1;EFCAB1;EFCAB1	TSS200;TSS200;TSS200
cg03625261	chr2	217497941	IGFBP2	TSS200
cg20375342	chr3	68981895	FAM19A4;FAM19A4	TSS200;TSS200
cg07382554	chr18	76740101	SALL3	TSS200
cg18521914	chr10	50887566	C10orf53;C10orf53	TSS200;TSS200
cg25649680	chr3	85007992	CADM2;CADM2	TSS200;TSS200
cg25057743	chr2	209271505	PTH2R	TSS200
cg16612742	chr19	35739461	LSR;LSR;LSR	TSS200;TSS200;TSS200
cg24248713	chr18	31803615	NOL4	TSS200
cg13424673	chr1	50489744	AGBL4	TSS200
cg10521638	chr4	74734919	CXCL1	TSS200
cg24319381	chr15	83316911	CPEB1	TSS200
cg00683895	chr19	58739944	ZNF544	TSS200
cg04120546	chr8	125740895	MTSS1	TSS200
cg03048535	chr12	109747100	FOXN4	TSS200
cg24184687	chr10	1779760	ADARB2	TSS200
cg21586412	chr17	47653212	NXPH3	TSS200
cg27202210	chr15	78933671	CHRNB4	TSS200
cg23262134	chr20	18038589	OVOL2	TSS200
cg20524425	chr5	135170272	LOC153328	TSS200
cg08476595	chr9	115774505	LOC169834	TSS200
cg11873482	chr7	97361244	TAC1;TAC1;TAC1;TAC1	TSS200;TSS200;TSS200;TSS200
cg13428152	chr17	71640338	SDK2	TSS200
cg21013756	chr2	234777080	MSL3L2	TSS200
cg01181350	chr7	15726348	MEOX2	TSS200
cg15646817	chr5	80256524	RASGRF2	TSS200
cg19613722	chr18	49866361	DCC	TSS200
cg20211713	chr19	12251300	ZNF20	TSS200
cg25011337	chr5	134915042	CXCL14	TSS200
cg22837767	chr20	21686251	PAX1	TSS200
cg13500074	chr2	60780746	BCL11A;BCL11A;BCL11A	TSS200;TSS200;TSS200
cg27467929	chr8	68864529	PREX2;PREX2	TSS200;TSS200
cg19517653	chr10	45869456	ALOX5	TSS200
cg25905812	chr9	841632	DMRT1	TSS200
cg19914607	chr3	50242505	SLC38A3	TSS200
cg16638540	chr19	58570468	ZNF135;ZNF135;ZNF135;ZNF135;ZNF135	TSS200;TSS200;TSS200;TSS200;TSS200
cg12122146	chr12	130388216	TMEM132D	TSS200
cg08578136	chr2	207139443	ZDBF2	TSS200
cg08616702	chr6	108487072	NR2E1	TSS200
cg20031656	chr11	125366267	FEZ1;FEZ1	TSS200;TSS200
cg27117639	chr5	76114635	F2RL1	TSS200
cg01408654	chr4	134070437	PCDH10;PCDH10	TSS200;TSS200
cg19484319	chr19	12444632	ZNF563	TSS200
cg09850980	chr5	36067127	UGT3A2;UGT3A2;UGT3A2	TSS200;TSS200;TSS200
cg04549460	chr8	109095975	RSPO2	TSS200
cg02250263	chr17	70117055	SOX9	TSS200
cg10824063	chr11	20690934	NELL1;NELL1	TSS200;TSS200
cg12843518	chr4	184826423	STOX2	TSS200
cg09551472	chr6	27280195	POM121L2	TSS200
cg03882242	chr12	103889798	C12orf42;C12orf42	TSS200;TSS200
cg13315970	chr6	86159197	NT5E	TSS200
cg24892510	chr19	53636309	ZNF415;ZNF415;ZNF415;ZNF415	TSS200;TSS200;TSS200;TSS200
cg17661881	chr1	226595978	PARP1	TSS200
cg11315153	chr6	62996299	KHDRBS2	TSS200
cg26745540	chr4	164253876	NPY1R	TSS200
cg23793121	chr10	13043884	CCDC3	TSS200
cg04402803	chr12	56109624	BLOC1S1	TSS200
cg10561835	chr14	37051949	NKX2-8	TSS200
cg20552487	chr7	12610166	SCIN	TSS200
cg08047907	chr1	169396858	C1orf114	TSS200
cg09833789	chr2	120301866	PCDP1	TSS200
cg17469019	chr1	117452517	PTGFRN	TSS200
cg03565659	chr12	72332624	TPH2	TSS200
cg05498007	chr18	44526756	KATNAL2	TSS200
cg00083059	chr6	39902348	MOCS1;MOCS1	TSS200;TSS200
cg05975219	chr16	90088916	GAS8;GAS8	TSS200;TSS200
cg16282993	chr6	26204765	HIST1H4E	TSS200
cg08827307	chr8	38965014	ADAM32	TSS200
cg10971510	chr15	100882218	ADAMTS17	TSS200
cg20429172	chr1	248020436	TRIM58	TSS200
cg22227424	chr17	40897270	EZH1	TSS200
cg20388635	chr1	29063076	YTHDF2	TSS200
cg08307816	chr14	100626192	DEGS2	TSS200
cg15687855	chr3	44754131	ZNF502;ZNF502;ZNF502;ZNF502	TSS200;TSS200;TSS200;TSS200
cg04535008	chr4	104641033	TACR3	TSS200
cg21124497	chr3	32859377	TRIM71	TSS200
cg12265829	chr14	24804022	ADCY4	TSS200
cg25775322	chr4	154710373	SFRP2	TSS200
cg22100873	chr20	62289540	RTEL1;RTEL1	TSS200;TSS200
cg21883683	chr15	32322525	CHRNA7	TSS200
cg07510423	chr2	106681998	C2orf40	TSS200
cg17227156	chr18	35146001	BRUNOL4;BRUNOL4;BRUNOL4;BRUNOL4	TSS200;TSS200;TSS200;TSS200
cg01557027	chr11	24518448	LUZP2	TSS200
cg18366209	chr6	123317408	CLVS2	TSS200
cg15822346	chr6	111408761	SLC16A10	TSS200
cg04792712	chr8	17271105	MTMR7	TSS200
cg03674157	chr3	161090019	C3orf57	TSS200
cg22427475	chr1	75139470	C1orf173	TSS200
cg12217987	chr4	115519436	UGT8	TSS200
cg03566719	chr14	42076759	LRFN5	TSS200
cg13168683	chr4	6202379	JAKMIP1;JAKMIP1	TSS200;TSS200
cg02886522	chr19	53636226	ZNF415;ZNF415;ZNF415;ZNF415	TSS200;TSS200;TSS200;TSS200
cg16411251	chr14	59932250	GPR135	TSS200
cg02719752	chr3	62861245	CADPS;CADPS;CADPS	TSS200;TSS200;TSS200
cg10949611	chr3	152552566	P2RY1	TSS200

## Sheet: SuppData2
Supplementary Data 2: SampleID, TCGA cancer-type, age, normal/cancer status, mitotic age of the 7 mitotic clocks, and tumor purity estimates from ESTIMATE, ABSOLUTE, LUMP, IHC and CPE for all TCGA samples.
SampleID	CancerType	Age	Status	stemTOC	epiTOC2	epiTOC1	EpiCMIT_hyper	RepliTali	HypoClock	EpiCMIT_hypo	ESTIMATE	ABSOLUTE	LUMP	IHC	CPE
TCGA-OR-A5LH-01A-11D-A29J-05	ACC	36	Cancer	0.068786	424.158	0.0380979	0.118333	86.5363	0.119881	0.314158	0.933		0.8325	0.95	0.9196
TCGA-P6-A5OF-01A-11D-A29J-05	ACC	55	Cancer	0.630276	2535.9	0.106095	0.359852	93.4546	0.122736	0.314217	0.9319		1	0.8	0.9253
TCGA-OR-A5LP-01A-11D-A29J-05	ACC	37	Cancer	0.0812105	19.5726	0.0360577	0.117425	88.6242	0.129451	0.315838	0.8118		0.7831	0.9	0.7799
TCGA-OR-A5JI-01A-11D-A29J-05	ACC	22	Cancer	0.216299	671.504	0.0535782	0.170024	89.0649	0.0927715	0.27219	0.8346		0.863	0.9	0.8738
TCGA-OR-A5LR-01A-11D-A29J-05	ACC	30	Cancer	0.0679401	555.637	0.0389685	0.152528	91.2291	0.127825	0.313544	0.9025		0.9102	0.95	0.8806
TCGA-OR-A5K6-01A-11D-A29J-05	ACC	56	Cancer	0.413295	1049.56	0.0600665	0.226604	92.538	0.148604	0.354338	0.9241		0.9185	0.95	0.9253
TCGA-OR-A5K3-01A-11D-A29J-05	ACC	53	Cancer	0.219045	791.217	0.0436948	0.191988	105.282	0.311174	0.489423	0.9145		0.8728	1	0.8944
TCGA-PK-A5H9-01A-11D-A29J-05	ACC	27	Cancer	0.184588	957.152	0.0506233	0.124074	99.5846	0.173497	0.383147	0.866		0.8899	0.8	0.8285
TCGA-OR-A5JB-01A-11D-A29J-05	ACC	52	Cancer	0.614345	8222.99	0.175049	0.478211	136.858	0.223937	0.44956	0.7634		0.7555	0.99	0.7474
TCGA-OR-A5KW-01A-11D-A29J-05	ACC	55	Cancer	0.209074	723.162	0.0499713	0.244609	92.4706	0.317679	0.548922	0.9629		0.9194	1	0.9601
TCGA-OR-A5J1-01A-11D-A29J-05	ACC	58	Cancer	0.599075	2678.83	0.0969829	0.432673	97.3176	0.240992	0.403228	0.9368		0.9774	0.8	0.9246
TCGA-OR-A5K0-01A-11D-A29J-05	ACC	69	Cancer	0.91754	8795.91	0.222432	0.542414	96.3387	0.425095	0.596126	0.9701		1	1	0.97
TCGA-OR-A5K8-01A-11D-A29J-05	ACC	39	Cancer	0.486562	2086.64	0.0719226	0.323074	100.24	0.193614	0.417516	0.9524		0.9699	0.97	0.9459
TCGA-OU-A5PI-01A-12D-A29J-05	ACC	53	Cancer	0.679804	2458.2	0.0994715	0.351658	117.318	0.0577398	0.168659	0.9435		0.9848	0.95	0.9338
TCGA-OR-A5LG-01A-11D-A29J-05	ACC	46	Cancer	0.170646	679.764	0.048619	0.217034	124.749	0.345361	0.655781	0.8878		0.8768	0.95	0.8806
TCGA-OR-A5LS-01A-11D-A29J-05	ACC	34	Cancer	0.393024	1400.41	0.0748382	0.276864	109.932	0.109075	0.248736	0.9774		0.9788	0.95	0.9798
TCGA-OR-A5LD-01A-11D-A29J-05	ACC	52	Cancer	0.918546	11201.7	0.289178	0.623633	136.313	0.127105	0.261208	0.9726		1	0.9	0.9732
TCGA-OR-A5LO-01A-11D-A29J-05	ACC	61	Cancer	0.763619	4862.1	0.164633	0.451097	123.879	0.256222	0.424327	0.9889		1	0.95	0.9954
TCGA-OR-A5JE-01A-11D-A29J-05	ACC	17	Cancer	0.773745	6934.38	0.157333	0.493774	129.065	0.144059	0.299971	0.9176		0.9164	0.99	0.9365
TCGA-OR-A5JG-01A-11D-A29J-05	ACC	61	Cancer	0.78081	5124.71	0.162731	0.442568	114.833	0.152342	0.292681	0.9344		1	0.99	0.961
TCGA-OR-A5J6-01A-31D-A29J-05	ACC	29	Cancer	0.062417	-65.1161	0.0296379	0.0663963	91.556	0.129482	0.334453	0.8741		0.7445	0.88	0.8396
TCGA-OR-A5LC-01A-11D-A29J-05	ACC	71	Cancer	0.781231	10453.8	0.212703	0.464596	136.805	0.354225	0.590771	0.9277		0.9616	0.65	0.9123
TCGA-OR-A5JQ-01A-11D-A29J-05	ACC	26	Cancer	0.119114	979.538	0.0543473	0.174785	93.7304	0.118556	0.324833	0.8306		0.7785	0.95	0.7804
TCGA-OR-A5L6-01A-11D-A29J-05	ACC	60	Cancer	0.307594	623.964	0.0548268	0.235375	103.722	0.349913	0.543488	0.9065		0.9121	0.95	0.9253
TCGA-OR-A5J3-01A-11D-A29J-05	ACC	23	Cancer	0.08484	161.49	0.0483744	0.235626	98.1589	0.313265	0.567006	0.967		0.9249	0.8	0.9466
TCGA-PK-A5H8-01A-11D-A29J-05	ACC	42	Cancer	0.1779	396.607	0.0436744	0.185319	118.955	0.289107	0.546635	0.9285		0.9699	0.8	0.9134
TCGA-OR-A5LN-01A-11D-A29J-05	ACC	31	Cancer	0.0852858	124.407	0.0337041	0.156621	93.3021	0.135655	0.357576	0.8308		0.8385	0.8	0.836
TCGA-OR-A5K2-01A-11D-A29J-05	ACC	32	Cancer	0.804338	6905.02	0.214584	0.560144	142.292	0.251335	0.345394	0.9336		0.9863	1	0.97
TCGA-OR-A5J9-01A-11D-A29J-05	ACC	22	Cancer	0.752207	3500.18	0.136994	0.437797	130.204	0.0523556	0.135519	0.9501		1	0.8	0.9428
TCGA-OR-A5JX-01A-11D-A29J-05	ACC	50	Cancer	0.168974	579.854	0.0467894	0.226429	105.523	0.247851	0.466892	0.9264		0.9663	1	0.97
TCGA-OR-A5JP-01A-11D-A29J-05	ACC	40	Cancer	0.780159	8967.27	0.191292	0.486694	135.785	0.131896	0.300666	0.9493		0.9762	0.95	0.9417
TCGA-OR-A5J7-01A-11D-A29J-05	ACC	30	Cancer	0.819516	12355.5	0.268557	0.558579	139.962	0.185203	0.368497	0.9607		0.9998	0.8	0.9571
TCGA-OR-A5K4-01A-11D-A29J-05	ACC	64	Cancer	0.0748946	198.429	0.044179	0.195994	100.098	0.439334	0.616545	0.9852		0.8771	0.97	0.9432
TCGA-OR-A5K5-01A-11D-A29J-05	ACC	59	Cancer	0.85905	9490.03	0.247429	0.591315	131.177	0.170836	0.326867	0.9649		1	0.9	0.9629
TCGA-OR-A5JC-01A-11D-A29J-05	ACC	37	Cancer	0.453233	1880.34	0.0815704	0.288364	93.9489	0.191085	0.361528	0.9265		0.9277	0.9	0.9107
TCGA-OR-A5L5-01A-11D-A29J-05	ACC	77	Cancer	0.110168	551.598	0.0428801	0.13926	91.1259	0.0922647	0.275427	0.8194		0.7538	0.95	0.7653
TCGA-OR-A5J2-01A-11D-A29J-05	ACC	44	Cancer	0.133432	802.831	0.0467174	0.163015	104.514	0.506879	0.769437	0.9175		0.6174	0.95	0.8985
TCGA-OR-A5JO-01A-11D-A29J-05	ACC	26	Cancer	0.167014	1547.33	0.0596741	0.129639	96.5681	0.116838	0.301432	0.6099		0.7451	0.9	0.7352
TCGA-OR-A5JK-01A-11D-A29J-05	ACC	49	Cancer	0.156389	1319.93	0.0512887	0.154641	97.494	0.35343	0.545369	0.7793		0.6584	0.99	0.7108
TCGA-OR-A5J8-01A-11D-A29J-05	ACC	66	Cancer	0.631945	10480.6	0.200984	0.417799	129.428	0.32802	0.448739	0.4893		0.6211	0.8	0.5895
TCGA-OR-A5JY-01A-31D-A29J-05	ACC	68	Cancer	0.695837	1799.2	0.102114	0.423521	121.459	0.321827	0.504806	0.9205		0.8876	0.9	0.9026
TCGA-OR-A5L3-01A-11D-A29J-05	ACC	67	Cancer	0.100286	-171.962	0.028353	0.138105	96.0568	0.214571	0.40387	0.9478		0.809	0.9	0.8103
TCGA-OR-A5JA-01A-11D-A29J-05	ACC	53	Cancer	0.565618	3042.2	0.105864	0.413306	119.532	0.273711	0.555003	0.9568		0.9783	0.9	0.9518
TCGA-PK-A5HA-01A-11D-A29J-05	ACC	63	Cancer	0.729617	13057.2	0.268389	0.530574	138.735	0.166725	0.350725	0.7793		0.8779	0.8	0.7913
TCGA-OR-A5JS-01A-11D-A29J-05	ACC	65	Cancer	0.63382	5801.11	0.146743	0.421458	135.956	0.137242	0.356238	0.9709		0.9821	0.85	0.971
TCGA-OR-A5L8-01A-11D-A29J-05	ACC	36	Cancer	0.0671461	445.177	0.0427416	0.210587	82.7431	0.0895566	0.26689	0.9658		1	0.9	0.964
TCGA-OR-A5JD-01A-11D-A29J-05	ACC	57	Cancer	0.150645	1050.88	0.0482299	0.144972	99.3467	0.0825058	0.23659	0.8785		0.8042	0.9	0.8456
TCGA-OR-A5JW-01A-11D-A29J-05	ACC	47	Cancer	0.450375	974.283	0.0677347	0.277856	90.8634	0.24031	0.436201	0.9433		0.9414	1	0.9659
TCGA-PK-A5HB-01A-11D-A29J-05	ACC	63	Cancer	0.742852	2705.83	0.10728	0.366675	109.916	0.181325	0.36526	0.9451		0.9592	0.8	0.936
TCGA-OR-A5LK-01A-11D-A29J-05	ACC	62	Cancer	0.425697	4019.89	0.104499	0.318511	117.631	0.104348	0.305654	0.7465		0.7252	0.95	0.7118
TCGA-OR-A5L4-01A-11D-A29J-05	ACC	48	Cancer	0.0738853	-249.234	0.0300749	0.172119	98.4297	0.306642	0.563405	0.9096		0.9557	0.95	0.8877
TCGA-OR-A5JZ-01A-11D-A29J-05	ACC	60	Cancer	0.0693874	295.948	0.0392708	0.1406	100.013	0.292482	0.498331	0.9165		0.9053	1	0.9235
TCGA-OR-A5J5-01A-11D-A29J-05	ACC	30	Cancer	0.2147	1895.9	0.0651078	0.349635	88.0964	0.17263	0.40528	0.9761		1	0.8	0.978
TCGA-OR-A5L9-01A-11D-A29J-05	ACC	53	Cancer	0.0737735	57.5468	0.0356327	0.123688	92.4754	0.195528	0.364144	0.8106		0.828	0.8	0.8327
TCGA-OR-A5LL-01A-11D-A29J-05	ACC	75	Cancer	0.451897	4447.6	0.111552	0.311871	105.245	0.219141	0.461013	0.9463		0.8955	0.98	0.9253
TCGA-OR-A5JR-01A-11D-A29J-05	ACC	45	Cancer	0.0892155	216.489	0.0360844	0.162329	94.905	0.205969	0.412959	0.9133		0.8399	0.85	0.8466
TCGA-OR-A5LT-01A-11D-A29J-05	ACC	57	Cancer	0.64492	3963.65	0.117369	0.318035	107.564	0.371278	0.51339	0.9651		0.9281	0.95	0.9503
TCGA-OR-A5K9-01A-11D-A29J-05	ACC	61	Cancer	0.812306	11056.8	0.204043	0.54056	124.235	0.369106	0.469712	0.9599		1	0.95	0.956
TCGA-OR-A5LE-01A-11D-A29J-05	ACC	14	Cancer	0.515901	1391.57	0.0709605	0.312933	92.559	0.428659	0.573726	0.9903		0.9833	0.9	0.9973
TCGA-OR-A5KT-01A-11D-A29J-05	ACC	44	Cancer	0.222313	1908.31	0.0693529	0.202474	98.6487	0.230295	0.457761	0.7383		0.7789	1	0.775
TCGA-OR-A5JT-01A-11D-A29J-05	ACC	65	Cancer	0.115306	151.673	0.0371966	0.171309	94.1938	0.253578	0.524837	0.9442		0.9037	0.9	0.9216
TCGA-OR-A5KY-01A-11D-A29J-05	ACC	23	Cancer	0.382391	675.697	0.0633229	0.311865	87.7526	0.105124	0.231258	0.909		0.8969	0.8	0.887
TCGA-OR-A5J4-01A-11D-A29J-05	ACC	23	Cancer	0.788224	6571.53	0.151096	0.516946	133.398	0.379052	0.532015			0.9199	0.8	0.866
TCGA-P6-A5OG-01A-22D-A29J-05	ACC	45	Cancer	0.481229	11326.5	0.226721	0.379461	119.354	0.101356	0.270728	0.5958		0.4912	0.9	0.4616
TCGA-OR-A5JV-01A-11D-A29J-05	ACC	55	Cancer	0.222308	1720.39	0.0561475	0.191775	109.853	0.241843	0.447309	0.74		0.5853	0.85	0.6575
TCGA-OR-A5JJ-01A-11D-A29J-05	ACC	65	Cancer	0.315883	947.096	0.0590018	0.3232	114.14	0.1418	0.294576	0.9645		0.9809	0.99	0.9624
TCGA-OR-A5JM-01A-11D-A29J-05	ACC	25	Cancer	0.890304	5173.49	0.145922	0.518344	101.306	0.313697	0.522233	0.9845		1	0.95	0.9894
TCGA-OR-A5JF-01A-11D-A29J-05	ACC	69	Cancer	0.452309	2056.51	0.0793742	0.256026	94.5813	0.144512	0.367689	0.9571		0.9064	0.95	0.9253
TCGA-OR-A5KZ-01A-11D-A29J-05	ACC	42	Cancer	0.246306	985.996	0.0548521	0.279553	101.951	0.333159	0.599655	0.9128		0.9696	0.8	0.8921
TCGA-OR-A5LJ-01A-11D-A29J-05	ACC	54	Cancer	0.515949	4173.23	0.0910042	0.340047	108.251	0.269084	0.548397	0.9541		0.9402	0.98	0.9481
TCGA-OR-A5JL-01A-11D-A29J-05	ACC	36	Cancer	0.0668663	378.727	0.0416572	0.13596	88.7352	0.161688	0.355714	0.9434		0.8113	0.97	0.9337
TCGA-OR-A5KU-01A-11D-A29J-05	ACC	37	Cancer	0.222382	1110.91	0.0666386	0.279229	89.4548	0.184306	0.381001	0.9603		0.9419	1	0.9665
TCGA-OR-A5KO-01A-11D-A29J-05	ACC	39	Cancer	0.435473	3437.36	0.0843574	0.324328	97.9404	0.201523	0.458381	0.9826		1	0.99	0.9868
TCGA-OR-A5LA-01A-11D-A29J-05	ACC	52	Cancer	0.0764697	78.586	0.0352898	0.0982739	91.5042	0.101951	0.282043	0.7921		0.7705	0.9	0.7651
TCGA-OR-A5LM-01A-11D-A29J-05	ACC	23	Cancer	0.206989	435.672	0.049935	0.182515	104.637	0.203594	0.381972	0.9535		0.9569	0.85	0.9521
TCGA-OR-A5KV-01A-11D-A29J-05	ACC	17	Cancer	0.103207	-403.394	0.0309043	0.213914	94.0843	0.214257	0.391248	0.9855		0.9168	1	0.97
TCGA-OR-A5KX-01A-11D-A29J-05	ACC	25	Cancer	0.856272	8512.22	0.202937	0.567898	140.996	0.418303	0.546373	0.9582		0.9836	0.8	0.97
TCGA-OR-A5LB-01A-11D-A29J-05	ACC	59	Cancer	0.694071	2640.56	0.10373	0.405911	115.355	0.215603	0.38462	0.9787		1	0.9	0.9816
TCGA-PA-A5YG-01A-11D-A29J-05	ACC	51	Cancer	0.15252	672.626	0.0486024	0.162787	96.9006	0.268955	0.442747	0.7785		0.6674	0.9	0.7097
TCGA-OR-A5K1-01A-11D-A29J-05	ACC	48	Cancer	0.0703179	503.853	0.0403869	0.144137	96.2936	0.341106	0.556815	0.9003		0.8611	1	0.8752
TCGA-HQ-A5NE-01A-12D-A28N-05	BLCA	57	Cancer	0.518231	6056.76	0.150365	0.354232	124.475	0.295758	0.450922	0.8739		0.6564	0.65	0.6573
TCGA-CU-A0YR-01A-12D-A10W-05	BLCA	83	Cancer	0.546896	6898.19	0.165277	0.389418	122.965	0.121674	0.295718	0.7562	0.47	0.6169	0.79	0.644
TCGA-FD-A3SS-01A-12D-A231-05	BLCA	66	Cancer	0.743271	11433.2	0.263081	0.535535	139.05	0.239511	0.451993	0.9488		0.8002	0.7	0.8806
TCGA-FD-A3B6-01A-21D-A211-05	BLCA	75	Cancer	0.587073	12932.9	0.262406	0.435172	126.679	0.328579	0.513074	0.7482	0.42	0.4935	0.75	0.6149
TCGA-CF-A47S-01A-11D-A23V-05	BLCA	41	Cancer	0.586165	8943.89	0.175812	0.504126	128.135	0.184821	0.467273	0.9436		0.8243	0.85	0.8283
TCGA-BT-A20R-11A-11D-A16P-05	BLCA	79	Normal	0.0835393	817.502	0.0410789	0.0987329	87.9209	0.0458726	0.184707
TCGA-2F-A9KR-01A-11D-A38H-05	BLCA	59	Cancer	0.571402	3832.84	0.108437	0.458464	94.3413	0.247655	0.48005	0.962		0.6937	0.7	0.9164
TCGA-CU-A72E-01A-12D-A33I-05	BLCA	76	Cancer	0.371613	3922.08	0.100846	0.371251	99.0786	0.440344	0.5905	0.8607		0.6098	0.85	0.6573
TCGA-5N-A9KI-01A-31D-A42F-05	BLCA	76	Cancer	0.672999	10735.8	0.218354	0.456338	138.962	0.410021	0.557859	0.8202			0.8	0.7118
TCGA-S5-AA26-01A-11D-A38H-05	BLCA	46	Cancer	0.927444	20681.3	0.367511	0.663403	134.81	0.562378	0.708697	0.9868		0.5641	0.9	0.7913
TCGA-GC-A3RB-01A-12D-A223-05	BLCA	54	Cancer	0.461104	2429.02	0.0785529	0.369351	97.951	0.504711	0.643663	0.9556	0.85	0.7719	0.9	0.8707
TCGA-K4-A4AC-01A-21D-A26N-05	BLCA	83	Cancer	0.492935	7886.37	0.181633	0.377297	123.402	0.212707	0.388991	0.8389		0.5271	0.85	0.7917
TCGA-BT-A0S7-01A-11D-A10W-05	BLCA	75	Cancer	0.273548	2590.61	0.080858	0.234606	93.254	0.207925	0.392349	0.9097	0.3	0.5578	0.75	0.6309
TCGA-GC-A3RC-01A-11D-A231-05	BLCA	59	Cancer	0.770791	18785.2	0.384395	0.616403	142.368	0.303408	0.525369	0.7865		0.7537	0.6	0.7453
TCGA-E7-A4XJ-01A-11D-A26N-05	BLCA	66	Cancer	0.859186	21638.9	0.451426	0.672031	152.991	0.382047	0.615835	0.9675		0.8288	0.8	0.836
TCGA-DK-A1A7-01A-11D-A13Z-05	BLCA	67	Cancer	0.717737	10150.3	0.222111	0.475953	115.551	0.194705	0.35351	0.9456	0.74	0.8214	0.85	0.8447
TCGA-UY-A78O-01A-12D-A33I-05	BLCA	75	Cancer	0.793609	19894.5	0.402743	0.618452	139.474	0.443401	0.678568	0.9356		0.8	0.7	0.7997
TCGA-CU-A3KJ-01A-11D-A21B-05	BLCA	75	Cancer	0.71327	9730.27	0.185069	0.530703	141.091	0.334638	0.472449	0.9047	0.74	0.6096	0.95	0.8726
TCGA-GD-A3OP-01A-21D-A223-05	BLCA	84	Cancer	0.5269	11987.2	0.253296	0.417811	121.369	0.151216	0.358162	0.8515	0.2	0.7507	0.7	0.7753
TCGA-BT-A20P-01A-11D-A14Z-05	BLCA	81	Cancer	0.872969	15596	0.357839	0.638652	123.489	0.0953318	0.268101	0.9703	0.94	0.9428	0.9	0.9689
TCGA-BT-A2LA-01A-11D-A18G-05	BLCA	54	Cancer	0.905084	11741.3	0.293969	0.504414	114.001	0.266337	0.453257	0.9948	0.95	0.7419	0.9	0.8956
TCGA-CF-A47T-01A-11D-A23V-05	BLCA	58	Cancer	0.641075	8518.91	0.148983	0.473013	120.5	0.560269	0.719709	0.9656		0.5882	0.99	0.6126
TCGA-E7-A3X6-01A-12D-A231-05	BLCA	70	Cancer	0.632543	9703.78	0.189824	0.457672	131.101	0.373389	0.5389	0.8395		0.4555	0.9	0.7925
TCGA-K4-AAQO-01A-11D-A38H-05	BLCA	56	Cancer	0.439487	3490.97	0.0789742	0.317901	98.6776	0.213972	0.413695	0.7779		0.7175	0.75	0.709
TCGA-GV-A3JV-01A-11D-A223-05	BLCA	66	Cancer	0.818615	22898.3	0.477202	0.662054	143.64	0.277924	0.535456	0.8425	0.67	0.8085	0.9	0.7974
TCGA-ZF-A9RL-01A-11D-A38H-05	BLCA	61	Cancer	0.78473	13061.9	0.275837	0.53736	130.298	0.42964	0.646399	0.9967		0.6938	0.95	0.7466
TCGA-UY-A9PF-01A-11D-A38H-05	BLCA	77	Cancer	0.352925	2013.05	0.0615918	0.230224	100.488	0.34978	0.487264	0.8765		0.5933	0.75	0.7466
TCGA-ZF-A9R3-01A-11D-A38H-05	BLCA	53	Cancer	0.774063	15576.2	0.293973	0.58984	143.206	0.331105	0.543465	0.9277		0.6313	0.8	0.7913
TCGA-FD-A3B7-01A-31D-A211-05	BLCA	66	Cancer	0.418875	7045.92	0.157114	0.351916	120.627	0.167936	0.342349	0.5105	0.27	0.4197	0.8	0.3859
TCGA-E7-A8O8-01A-11D-A365-05	BLCA	59	Cancer	0.849437	11993	0.245811	0.606219	138.227	0.646419	0.768061	0.9641		0.713	0.95	0.6975
TCGA-FJ-A3Z9-01A-11D-A26N-05	BLCA	72	Cancer	0.791378	13715	0.273291	0.59725	147.214	0.495443	0.707265	0.9899		0.6251	0.8	0.961
TCGA-BT-A20Q-01A-11D-A14Z-05	BLCA	73	Cancer	0.664243	10512.1	0.224185	0.530998	127.894	0.201976	0.407385	0.7563	0.68	0.7753	0.8	0.7251
TCGA-E7-A5KF-01A-11D-A28N-05	BLCA	67	Cancer	0.555624	5914.13	0.135179	0.510794	123.912	0.205371	0.436023	0.9939		0.6692	0.8	0.7019
TCGA-CF-A5UA-01A-11D-A28N-05	BLCA	67	Cancer	0.860931	13601.9	0.282428	0.590904	118.891	0.0844337	0.255514	0.9725		0.9171	0.95	0.9374
TCGA-4Z-AA7S-01A-11D-A392-05	BLCA	66	Cancer	0.829804	19828.5	0.413651	0.698576	145.134	0.281163	0.612855	0.9737		0.855	0.7	0.8643
TCGA-GC-A6I3-11A-11D-A31M-05	BLCA	90	Normal	0.382385	9303.5	0.197526	0.339237	105.878	0.0851631	0.304911
TCGA-YC-A9TC-01A-22D-A392-05	BLCA	71	Cancer	0.615009	9365.91	0.154877	0.45924	97.1033	0.289849	0.417026	0.9423		0.582	0.75	0.8806
TCGA-XF-AAN8-01A-11D-A42F-05	BLCA	74	Cancer	0.091048	78.7398	0.0317489	0.0747424	86.0809	0.0401061	0.115267				0.85
TCGA-DK-A3WX-01A-22D-A231-05	BLCA	67	Cancer	0.267618	2883.38	0.0749102	0.233323	123.808	0.170791	0.346892	0.7435		0.4265	0.6	0.6623
TCGA-FD-A3N6-01A-11D-A21B-05	BLCA	43	Cancer	0.82805	17769.9	0.311026	0.549213	135.97	0.460373	0.643355	0.917	0.83	0.6461	0.75	0.8669
TCGA-5N-A9KM-01A-11D-A42F-05	BLCA	73	Cancer	0.727131	13001.7	0.307529	0.517652	131.959	0.437427	0.615214	0.8192			0.6	0.7558
TCGA-H4-A2HQ-01A-11D-A17Y-05	BLCA	64	Cancer	0.464867	4492.96	0.0886046	0.377871	97.8533	0.473922	0.549888	0.9772		0.7925	0.75	0.791
TCGA-4Z-AA84-01A-11D-A392-05	BLCA	61	Cancer	0.593248	13283	0.262948	0.451989	135.774	0.336729	0.551425	0.9498		0.6514	0.93	0.7913
TCGA-K4-A54R-01A-11D-A26N-05	BLCA	59	Cancer	0.666478	16694.9	0.372201	0.519841	130.417	0.199855	0.455923	0.7394		0.6581	0.8	0.6566
TCGA-FD-A3SN-01A-12D-A231-05	BLCA	79	Cancer	0.738335	18914.3	0.452168	0.602449	139.985	0.325187	0.586475	0.8791		0.6953	0.8	0.7019
TCGA-CF-A5U8-01A-11D-A28N-05	BLCA	59	Cancer	0.481557	5401.42	0.118409	0.441366	103.256	0.277552	0.528735	0.9796		0.73	0.95	0.7175
TCGA-FD-A62N-01A-11D-A30F-05	BLCA	69	Cancer	0.53133	10949.9	0.263903	0.432655	122.814	0.147405	0.392526	0.3622		0.469	0.65	0.1444
TCGA-K4-A3WS-01A-11D-A231-05	BLCA	66	Cancer	0.521919	8885.43	0.195791	0.435922	106.944	0.164471	0.391605	0.6588		0.6868	0.7	0.6668
TCGA-4Z-AA89-01A-11D-A392-05	BLCA	60	Cancer	0.50093	6471.54	0.159378	0.469201	130.575	0.243986	0.483229	0.982		0.5673	0.87	0.7913
TCGA-ZF-A9R1-01A-11D-A392-05	BLCA	81	Cancer	0.607153	10258.8	0.221536	0.420308	122.019	0.237801	0.409941	0.9507		0.7247	0.7	0.8806
TCGA-DK-AA75-01A-11D-A392-05	BLCA	82	Cancer	0.622949	4038.43	0.0967371	0.338471	97.1519	0.562391	0.667281	0.9919		0.6095	0.8	0.7019
TCGA-GV-A3QH-01A-11D-A223-05	BLCA	67	Cancer	0.639077	5445.63	0.134501	0.452734	112.169	0.284605	0.393167	0.9948	0.48	0.8207	0.8	0.8747
TCGA-HQ-A2OF-01A-11D-A26N-05	BLCA	52	Cancer	0.950811	21760.5	0.441576	0.674298	132.201	0.211196	0.416461	0.9876		0.9883	0.9	0.9937
TCGA-YC-A8S6-01A-31D-A38H-05	BLCA	71	Cancer	0.435042	9717.99	0.200387	0.343066	112.745	0.110926	0.32125	0.7107		0.4494	0.65	0.6177
TCGA-ZF-AA56-01A-31D-A392-05	BLCA	79	Cancer	0.483778	8719.34	0.168744	0.405059	124.4	0.220647	0.40523	0.8098		0.5193	0.65	0.6573
TCGA-FD-A62O-01A-11D-A30F-05	BLCA	74	Cancer	0.88412	17460.6	0.390194	0.708475	148.693	0.371065	0.57912	0.945		0.8684	0.85	0.8806
TCGA-PQ-A6FN-01A-11D-A31M-05	BLCA	78	Cancer	0.522106	12363.1	0.232569	0.456117	118.351	0.210909	0.471137	0.8664		0.474	0.7	0.4166
TCGA-C4-A0F1-01A-11D-A10W-05	BLCA	71	Cancer	0.216848	1157.67	0.0552923	0.196199	95.3689	0.315096	0.50621	0.8771		0.3545	0.8	0.7019
TCGA-BT-A2LB-01A-11D-A18G-05	BLCA	73	Cancer	0.606925	9209.14	0.187231	0.449171	122.532	0.316826	0.512091	0.781	0.5	0.5743	0.8	0.5858
TCGA-FJ-A3ZE-01A-11D-A23O-05	BLCA	65	Cancer	0.702085	9106.64	0.197323	0.591817	144.901	0.316646	0.646889	0.9958	0.87	0.7831	0.85	0.8838
TCGA-BT-A20V-11A-11D-A14Z-05	BLCA	59	Normal	0.168547	2250.2	0.063595	0.175245	88.588	0.0510255	0.236655
TCGA-BT-A20V-01A-11D-A14Z-05	BLCA	59	Cancer	0.735443	10314.7	0.247709	0.48778	124.325	0.384591	0.504195	0.9455	0.66	0.7162	0.6	0.8347
TCGA-DK-AA74-01A-11D-A392-05	BLCA	75	Cancer	0.407701	10149.5	0.188812	0.305938	106.348	0.109752	0.318446	0.454		0.4944	0.7	0.4406
TCGA-DK-A1A6-06A-11D-A42F-05	BLCA	53	Cancer	0.622946	10732.3	0.246701	0.505455	130.485	0.272326	0.453473				0.7
TCGA-ZF-AA4U-01A-11D-A38H-05	BLCA	70	Cancer	0.583089	5412.23	0.116881	0.459686	126.971	0.47626	0.651656	0.9877		0.7396	0.98	0.7913
TCGA-BT-A3PJ-01A-21D-A223-05	BLCA	76	Cancer	0.681814	15962.4	0.327296	0.468066	143.724	0.408277	0.551791	0.8356	0.51	0.5	0.9	0.7169
TCGA-FD-A5BS-01A-21D-A26N-05	BLCA	68	Cancer	0.34636	6066.8	0.147382	0.309401	104.833	0.126231	0.376054	0.2717		0.2965	0.7	0.208
TCGA-BT-A2LD-01A-12D-A211-05	BLCA	78	Cancer	0.495417	3204.45	0.0808728	0.270418	102.213	0.40492	0.560817	0.8999	0.33	0.6924	0.9	0.5746
TCGA-GD-A3OP-11A-11D-A223-05	BLCA	84	Normal	0.246102	2806.17	0.0711451	0.232586	92.3181	0.0590592	0.272695
TCGA-BT-A20J-11A-11D-A14Z-05	BLCA	75	Normal	0.144157	2196.39	0.0662445	0.172666	88.1912	0.0503109	0.216365
TCGA-BL-A13J-01B-04D-A276-05	BLCA	65	Cancer	0.740376	15228.9	0.345182	0.571309	130.596	0.269555	0.497617			0.775	0.8	0.7138
TCGA-FT-A3EE-01A-11D-A203-05	BLCA	80	Cancer	0.637605	11483.4	0.24878	0.51569	139.328	0.408787	0.583146	0.9458	0.6	0.7124	0.9	0.7143
TCGA-BT-A20N-01A-11D-A14Z-05	BLCA	72	Cancer	0.636503	10058	0.223387	0.50723	133.901	0.282682	0.443941	0.965	0.35	0.7465	0.8	0.7417
TCGA-BT-A2LA-11A-11D-A18G-05	BLCA	54	Normal	0.249142	2930.93	0.0784622	0.206773	96.3978	0.0545273	0.232866
TCGA-K4-A4AB-01B-12D-A28N-05	BLCA	76	Cancer	0.435066	3448.13	0.0965905	0.367604	128.833	0.456505	0.609548	0.8147		0.5402	0.7	0.6573
TCGA-GC-A4ZW-01A-11D-A26N-05	BLCA	71	Cancer	0.912084	18531.9	0.418754	0.695025	149.921	0.231377	0.390058	0.9833		0.9663	0.9	0.9878
TCGA-2F-A9KW-01A-11D-A38H-05	BLCA	67	Cancer	0.640267	7852.04	0.190165	0.4207	93.9435	0.320372	0.506363	0.8471		0.7657	0.8	0.7913
TCGA-4Z-AA80-01A-11D-A392-05	BLCA	73	Cancer	0.564144	5946.9	0.145722	0.394229	127.077	0.410247	0.581824	0.9827		0.514	0.75	0.7466
TCGA-CU-A5W6-01A-11D-A28N-05	BLCA	70	Cancer	0.476722	5755.69	0.120202	0.384719	118.636	0.151333	0.314294	0.9254		0.6982	0.85	0.7913
TCGA-FD-A3N5-01A-11D-A21B-05	BLCA	69	Cancer	0.749615	19541.9	0.384131	0.602707	151.74	0.312348	0.558668	0.9078	0.66	0.6969	0.8	0.8347
TCGA-FJ-A3Z7-01A-12D-A23O-05	BLCA	76	Cancer	0.704902	7883.14	0.20236	0.513742	117.183	0.18427	0.329238	0.8302	0.54	0.775	0.75	0.7585
TCGA-ZF-A9R0-01A-11D-A38H-05	BLCA	82	Cancer	0.665989	13654	0.315332	0.524816	137.725	0.36419	0.534238	0.8852		0.636	0.7	0.7913
TCGA-K4-A3WV-11A-21D-A231-05	BLCA	77	Normal	0.142519	1739.31	0.0597502	0.185995	90.8891	0.0333433	0.188786
TCGA-XF-AAN4-01A-11D-A42F-05	BLCA	77	Cancer	0.231203	4589.09	0.118633	0.201636	101.16	0.0945194	0.209235	0.4888			0.7	0.4644
TCGA-K4-A3WV-01A-11D-A231-05	BLCA	77	Cancer	0.736056	8247.44	0.15259	0.454763	96.9065	0.297482	0.455245	0.9795		0.8381	0.7	0.8806
TCGA-GU-AATP-01A-11D-A392-05	BLCA	74	Cancer	0.553325	5608.75	0.142394	0.43205	110.059	0.243445	0.439855	0.7695		0.7602	0.8	0.7019
TCGA-GC-A3YS-01A-11D-A23O-05	BLCA	61	Cancer	0.666765	13403.2	0.288233	0.497778	135.918	0.267581	0.440165	0.7607	0.32	0.7409	0.8	0.7079
TCGA-E7-A7DU-01A-11D-A32C-05	BLCA	73	Cancer	0.59025	6188.33	0.136722	0.516802	136.545	0.395007	0.617613	0.9653		0.5356	0.95	0.7019
TCGA-DK-A6B2-01A-11D-A30F-05	BLCA	70	Cancer	0.614144	7442.04	0.154135	0.432585	135.797	0.33948	0.525756	0.7039		0.6762	0.7	0.6543
TCGA-GU-AATO-01A-11D-A392-05	BLCA	75	Cancer	0.647109	15768.4	0.34153	0.497104	123.538	0.180016	0.377424	0.7946		0.6652	0.75	0.7316
TCGA-BT-A0YX-01A-11D-A10W-05	BLCA	70	Cancer	0.568258	9445.21	0.176486	0.378731	119.254	0.277173	0.469468	0.8479	0.49	0.5182	0.7	0.7094
TCGA-E7-A6MF-01A-12D-A32C-05	BLCA	37	Cancer	0.103256	1755.9	0.0442028	0.167489	87.6091	0.082379	0.268773	0.9767		0.8527	0.9	0.8617
TCGA-GV-A40G-01A-11D-A23O-05	BLCA	77	Cancer	0.874402	15804.1	0.376432	0.665434	130.505	0.296268	0.503433	0.9852		0.9277	0.9	0.9498
TCGA-C4-A0EZ-01A-21D-A10W-05	BLCA	69	Cancer	0.949369	16238.7	0.33885	0.548156	136.836	0.279629	0.435649	0.9886		0.9123	0.885	0.9317
TCGA-GD-A76B-01A-11D-A32C-05	BLCA	86	Cancer	0.583116	14859.6	0.302912	0.515569	119.95	0.226597	0.414532	0.8393		0.5167	0.8	0.7923
TCGA-GU-A763-01A-11D-A32C-05	BLCA	72	Cancer	0.605873	5579.61	0.131845	0.462216	119.713	0.481575	0.639738	0.9753		0.6505	0.8	0.7019
TCGA-R3-A69X-01A-22D-A30F-05	BLCA	70	Cancer	0.433833	7285.11	0.1631	0.384147	112.943	0.169437	0.3769	0.7211		0.5228	0.75	0.6318
TCGA-GC-A3I6-01A-11D-A211-05	BLCA	45	Cancer	0.745473	19919	0.371824	0.578726	145.774	0.20265	0.499713	0.8473	0.73	0.7382	0.8	0.8291
TCGA-DK-A2I4-01A-11D-A21B-05	BLCA	79	Cancer	0.519987	10537.5	0.242275	0.41173	118.671	0.181623	0.413066	0.4359	0.29	0.4666	0.8	0.4229
TCGA-CF-A47Y-01A-11D-A23V-05	BLCA	55	Cancer	0.386513	3666.03	0.0991256	0.371904	112.7	0.146839	0.397327	0.9725		0.7586	0.99	0.8806
TCGA-GC-A3RD-01A-12D-A231-05	BLCA	83	Cancer	0.484622	5159.68	0.123916	0.408741	117.572	0.382568	0.53987	0.947		0.8037	0.9	0.9253
TCGA-DK-A2I2-01A-11D-A17Y-05	BLCA	63	Cancer	0.423843	3777.12	0.10985	0.30767	96.3854	0.188767	0.307429	0.711	0.29	0.4913	0.75	0.528
TCGA-G2-A2EJ-01A-11D-A17Y-05	BLCA	56	Cancer	0.591658	11338.8	0.220961	0.43422	114.107	0.278916	0.476067	0.926	0.61	0.5344	0.8	0.677
TCGA-2F-A9KO-01A-11D-A38H-05	BLCA	63	Cancer	0.519474	7971.88	0.164728	0.404977	108.304	0.231124	0.433536	0.7653		0.5425	0.65	0.6918
TCGA-DK-A3IM-01A-11D-A211-05	BLCA	76	Cancer	0.760549	7544.98	0.158762	0.44341	127.438	0.232381	0.399125	0.9839	0.76	0.7914	0.85	0.8374
TCGA-FD-A43X-01A-11D-A23V-05	BLCA	84	Cancer	0.829579	10122.1	0.223065	0.611796	151.123	0.514574	0.650291	0.9819		0.7096	0.8	0.8985
TCGA-FD-A5C0-01A-11D-A28N-05	BLCA	61	Cancer	0.661238	13983.5	0.308687	0.486809	124.32	0.167261	0.41665	0.8893		0.7272	0.8	0.836
TCGA-E7-A97P-01A-11D-A38H-05	BLCA	73	Cancer	0.553968	13801.3	0.257013	0.454571	127.094	0.217263	0.426527	0.713		0.4217	0.85	0.6126
TCGA-XF-AAN1-01A-31D-A42F-05	BLCA	75	Cancer	0.874353	18650.8	0.380484	0.710097	147.139	0.374795	0.565188	0.9584			0.9	0.9173
TCGA-BT-A20O-01A-21D-A14Z-05	BLCA	75	Cancer	0.429353	8212.76	0.184381	0.376135	110.784	0.154919	0.386886	0.4014	0.18	0.3083	0.75	0.2098
TCGA-FD-A5BY-01A-31D-A28N-05	BLCA	63	Cancer	0.753693	20534.9	0.42587	0.579185	147.135	0.253284	0.506066	0.8593		0.6803	0.8	0.7913
TCGA-G2-AA3D-01A-11D-A392-05	BLCA	60	Cancer	0.336184	2477.66	0.0778518	0.361237	112.29	0.0725407	0.237665	0.9873		0.6508	0.65	0.6244
TCGA-XF-A9T2-01A-11D-A42F-05	BLCA	54	Cancer	0.701766	9884.26	0.208275	0.419631	120.654	0.530983	0.746469	0.8882			0.65	0.825
TCGA-KQ-A41R-01A-21D-A34V-05	BLCA	80	Cancer	0.789543	16288.9	0.305675	0.56399	144.301	0.537577	0.664602	0.9668		0.5695	0.8	0.6573
TCGA-CF-A9FM-01A-11D-A38H-05	BLCA	50	Cancer	0.392879	2706.17	0.0731761	0.286716	96.4217	0.0940069	0.311871	0.9495		0.7545	0.8	0.7463
TCGA-ZF-A9RD-01A-11D-A42F-05	BLCA	75	Cancer	0.575354	13138.8	0.265542	0.431803	120.393	0.170181	0.445593	0.7398			0.6	0.7689
TCGA-ZF-AA52-01A-12D-A392-05	BLCA	70	Cancer	0.566081	12686.4	0.296576	0.430142	127.742	0.218182	0.410654	0.7234		0.5745	0.8	0.6349
TCGA-XF-A9T4-01A-11D-A392-05	BLCA	48	Cancer	0.731983	19586.9	0.383821	0.585476	147.098	0.299134	0.559361	0.8727		0.5832	0.9	0.8377
TCGA-DK-A1AA-01A-11D-A13Z-05	BLCA	57	Cancer	0.602263	6366.03	0.139314	0.495731	129.584	0.452265	0.677595	0.9497	0.95	0.5193	0.95	0.8891
TCGA-GV-A3QG-01A-11D-A223-05	BLCA	65	Cancer	0.598498	13366.2	0.301667	0.506983	131.404	0.357227	0.530016	0.4241	0.46	0.4939	0.65	0.5196
TCGA-FD-A5BX-01A-11D-A26N-05	BLCA	82	Cancer	0.51527	5005.68	0.129994	0.39302	120.268	0.26459	0.413607	0.6119		0.4777	0.7	0.4834
TCGA-FD-A3SL-01A-21D-A231-05	BLCA	60	Cancer	0.637006	9081.43	0.209591	0.421423	135.201	0.202431	0.429274	0.7073		0.7898	0.75	0.6131
TCGA-DK-AA6P-01A-11D-A392-05	BLCA	72	Cancer	0.540553	4654.96	0.110163	0.38099	89.0801	0.18222	0.315978	0.9854		0.765	0.7	0.7913
TCGA-CF-A9FL-01A-11D-A38H-05	BLCA	85	Cancer	0.657337	8717.11	0.168716	0.510955	105.088	0.466784	0.560148	0.8943		0.5959	0.7	0.7466
TCGA-ZF-AA53-01A-11D-A392-05	BLCA	60	Cancer	0.32252	3591.26	0.0957233	0.272746	107.954	0.150211	0.293435	0.6573		0.4056	0.6	0.5451
TCGA-BT-A42B-01A-32D-A23O-05	BLCA	59	Cancer	0.803664	23367.7	0.457499	0.63933	144.082	0.360603	0.602226		0.78	0.7201	0.6	0.8806
TCGA-HQ-A2OE-01A-11D-A203-05	BLCA	69	Cancer	0.752803	6528.14	0.152481	0.464152	112.182	0.492174	0.634795	0.9798		0.7242	0.95	0.836
TCGA-UY-A78N-01A-12D-A33I-05	BLCA	80	Cancer	0.770639	11611.3	0.239132	0.53593	133.581	0.326798	0.519181	0.9787		0.911	0.7	0.9302
TCGA-FD-A5BR-01A-11D-A26N-05	BLCA	57	Cancer	0.573881	11623.9	0.218515	0.472921	129.806	0.278189	0.523779	0.8105		0.567	0.65	0.7532
TCGA-E7-A5KE-01A-11D-A28N-05	BLCA	78	Cancer	0.887673	11611.8	0.231746	0.547188	143.237	0.666754	0.73728	0.996		0.7327	0.85	0.7466
TCGA-E7-A519-01A-11D-A26N-05	BLCA	72	Cancer	0.547623	5732.64	0.134078	0.443557	120.954	0.0973742	0.339742	0.8438		0.6886	0.85	0.7913
TCGA-CF-A9FH-01A-11D-A38H-05	BLCA	85	Cancer	0.897308	14149.8	0.305102	0.630797	146.828	0.246929	0.52234	0.9761		0.7742	0.7	0.7694
TCGA-SY-A9G5-01A-11D-A38H-05	BLCA	66	Cancer	0.558841	13134	0.282147	0.481862	129.09	0.309371	0.531039	0.642		0.6092	0.7	0.5755
TCGA-UY-A9PE-01A-11D-A38H-05	BLCA	86	Cancer	0.60454	10753.9	0.225609	0.43563	130.901	0.350702	0.543312	0.9235		0.6178	0.75	0.8806
TCGA-C4-A0F6-01A-11D-A10W-05	BLCA	82	Cancer	0.706903	12164.8	0.227063	0.504884	132.654	0.494844	0.632316	0.8904	0.68	0.7867	0.725	0.7959
TCGA-CF-A47V-01A-11D-A23V-05	BLCA	52	Cancer	0.896899	23079.9	0.430577	0.739356	144.896	0.164418	0.437633	0.8953		0.7416	0.99	0.8683
TCGA-GU-A42P-01A-11D-A23V-05	BLCA	72	Cancer	0.613052	3875.36	0.0917436	0.367132	98.0939	0.478222	0.652302	0.9931		0.7163	0.75	0.7014
TCGA-K4-A5RH-01A-11D-A30F-05	BLCA	69	Cancer	0.635845	11085.5	0.266325	0.465489	133.842	0.151863	0.369484	0.5108		0.4726	0.65	0.415
TCGA-DK-A6B0-01A-11D-A31M-05	BLCA	61	Cancer	0.212712	2817.57	0.0727962	0.368676	107.743	0.0796509	0.299813	0.9773		0.6859	0.8	0.7466
TCGA-C4-A0F7-01A-11D-A10W-05	BLCA	77	Cancer	0.762109	11249.2	0.212708	0.493222	125.593	0.16393	0.350281	0.9508		0.813	0.75	0.8806
TCGA-BT-A20P-11A-11D-A14Z-05	BLCA	81	Normal	0.144619	2224.35	0.0644145	0.165917	86.4727	0.0458098	0.209931
TCGA-XF-A9T6-01A-11D-A42F-05	BLCA	88	Cancer	0.803685	14958.3	0.330998	0.566963	146.92	0.392137	0.581013	0.9331			0.8	0.8108
TCGA-ZF-AA54-01A-11D-A392-05	BLCA	71	Cancer	0.502301	8412.21	0.163952	0.366777	115.039	0.203665	0.375312	0.605		0.5056	0.95	0.4741
TCGA-G2-A2ES-01A-11D-A17Y-05	BLCA	85	Cancer	0.575918	14663.2	0.299676	0.45924	130.164	0.281764	0.538221	0.8104	0.55	0.6059	0.75	0.6932
TCGA-UY-A9PH-01A-11D-A38H-05	BLCA	73	Cancer	0.453484	5423.48	0.125761	0.369116	131.692	0.332823	0.544833	0.6703		0.432	0.8	0.3672
TCGA-XF-A8HE-01A-11D-A365-05	BLCA	47	Cancer	0.310537	3918.6	0.0986564	0.27959	111.425	0.20404	0.376637	0.7968		0.4025	0.8	0.7346
TCGA-E7-A7XN-01A-11D-A34V-05	BLCA	66	Cancer	0.4847	11234.3	0.214069	0.352436	109.641	0.206709	0.398789	0.785		0.3577	0.9	0.7019
TCGA-GD-A3OQ-01A-32D-A223-05	BLCA	48	Cancer	0.782383	17301.6	0.367649	0.621424	145.34	0.341406	0.586947	0.94	0.78	0.7212	0.95	0.8916
TCGA-FD-A6TA-01A-12D-A33I-05	BLCA	58	Cancer	0.624452	12141.4	0.246597	0.43959	124.149	0.311288	0.509469	0.719		0.4928	0.82	0.629
TCGA-UY-A78L-01A-12D-A33I-05	BLCA	62	Cancer	0.611332	9785.66	0.232236	0.460821	131.374	0.369513	0.55606	0.8731		0.6245	0.7	0.7466
TCGA-FD-A3B5-01A-11D-A211-05	BLCA	86	Cancer	0.553088	6098.12	0.133305	0.363997	135.302	0.362441	0.526197	0.9318	0.52	0.6884	0.85	0.6852
TCGA-DK-A1A5-01A-11D-A13Z-05	BLCA	79	Cancer	0.64291	11537	0.255082	0.485629	132.143	0.292421	0.545571	0.8124	0.59	0.7186	0.7	0.7132
TCGA-FD-A43N-01A-11D-A23V-05	BLCA	76	Cancer	0.671997	8773.24	0.194607	0.483136	139.661	0.490628	0.652911	0.8526		0.6475	0.75	0.7019
TCGA-DK-AA6M-01A-11D-A392-05	BLCA	64	Cancer	0.61374	15949.7	0.366403	0.534	134.178	0.195526	0.442766	0.7425		0.6471	0.7	0.6609
TCGA-UY-A8OC-01A-11D-A365-05	BLCA	90	Cancer	0.653613	17271.4	0.371062	0.514074	123.401	0.322981	0.543302	0.8202		0.5546	0.65	0.7663
TCGA-4Z-AA83-01A-11D-A392-05	BLCA	52	Cancer	0.751259	14607.4	0.345796	0.607819	128.53	0.346923	0.546836	0.8915		0.639	0.95	0.7913
TCGA-CF-A1HR-01A-11D-A13Z-05	BLCA	62	Cancer	0.509991	8471.88	0.17511	0.402042	120.112	0.211606	0.448743	0.9042	0.4	0.607	0.7	0.5576
TCGA-CF-A8HY-01A-11D-A365-05	BLCA	59	Cancer	0.701045	7158.05	0.166724	0.501173	100.615	0.245733	0.46265	0.9657		0.6915	0.94	0.8985
TCGA-FD-A5BZ-01A-11D-A28N-05	BLCA	77	Cancer	0.590598	10631.7	0.218716	0.448572	123.976	0.293973	0.479697	0.772		0.8007	0.75	0.7913
TCGA-BT-A20U-11A-11D-A14Z-05	BLCA	70	Normal	0.509321	13797.5	0.279552	0.442374	112.736	0.149854	0.392547
TCGA-GC-A6I1-01A-12D-A31M-05	BLCA	90	Cancer	0.563575	14873.8	0.281204	0.476331	130.107	0.305224	0.541209	0.665		0.386	0.8	0.5556
TCGA-GC-A3OO-01A-11D-A231-05	BLCA	79	Cancer	0.543846	10363.2	0.265034	0.433483	127.419	0.131717	0.389443	0.8504		0.6153	0.6	0.8074
TCGA-DK-A1AE-01A-11D-A13Z-05	BLCA	84	Cancer	0.679447	7469.88	0.179317	0.467719	128.652	0.388863	0.522114	0.9616	0.83	0.7328	0.8	0.8706
TCGA-ZF-A9R9-01A-11D-A38H-05	BLCA	58	Cancer	0.886746	29063.2	0.615555	0.785759	152.853	0.346871	0.673112	0.7685		0.6762	0.6	0.6961
TCGA-K4-A6MB-01A-11D-A31M-05	BLCA	64	Cancer	0.689565	5314.2	0.121449	0.486729	93.0916	0.413756	0.597326	0.9048		0.8082	0.7	0.8094
TCGA-GU-AATQ-01A-11D-A392-05	BLCA	68	Cancer	0.590313	5251.79	0.126463	0.441538	127.892	0.439218	0.616468	0.9335		0.6633	0.75	0.6391
TCGA-FD-A3SQ-01A-21D-A231-05	BLCA	62	Cancer	0.526528	10657.1	0.220548	0.472221	126.862	0.18422	0.427026	0.7258		0.7237	0.8	0.6382
TCGA-FD-A3B8-01A-31D-A211-05	BLCA	56	Cancer	0.194526	2234.52	0.0654897	0.189706	91.9759	0.0792593	0.285963	0.3916	0.18	0.3541	0.85	0.3047
TCGA-FD-A6TB-01A-12D-A33I-05	BLCA	82	Cancer	0.397878	7561.56	0.176703	0.362951	115.592	0.142356	0.34133	0.6431		0.4727	0.65	0.5258
TCGA-DK-A2I1-01A-11D-A17Y-05	BLCA	73	Cancer	0.233724	3642.84	0.0891857	0.298121	118.028	0.397417	0.593126	0.6992	0.57	0.6066	0.7	0.5873
TCGA-H4-A2HO-01A-11D-A17Y-05	BLCA	53	Cancer	0.610878	4754.72	0.10799	0.391173	121.926	0.369558	0.519196	0.8986	0.64	0.7135	0.75	0.7339
TCGA-BT-A3PK-01A-21D-A223-05	BLCA	80	Cancer	0.421065	4633.24	0.116014	0.320125	101.246	0.144087	0.323511	0.7673	0.29	0.4356	0.6	0.5662
TCGA-CU-A0YR-11A-13D-A10W-05	BLCA	83	Normal	0.157339	2729.41	0.0721552	0.183088	89.1535	0.0586347	0.212991
TCGA-XF-A9SZ-01A-11D-A392-05	BLCA	79	Cancer	0.514275	6672.88	0.163795	0.323471	125.895	0.153523	0.337438	0.7406		0.5621	0.8	0.6583
TCGA-XF-A9SM-01A-11D-A42F-05	BLCA	76	Cancer	0.442163	5087.37	0.131295	0.298399	117.601	0.134051	0.327143	0.5598			0.75	0.535
TCGA-KQ-A41O-01A-12D-A34V-05	BLCA	84	Cancer	0.913069	12593.9	0.249951	0.601099	149.109	0.619385	0.652581	0.9992		0.9838	0.8	1
TCGA-ZF-A9RF-01A-11D-A38H-05	BLCA	74	Cancer	0.599645	10524.8	0.213773	0.4365	139.323	0.369727	0.558489	0.7792		0.4525	0.8	0.7107
TCGA-CU-A0YO-01A-11D-A10W-05	BLCA	84	Cancer	0.462241	7390.93	0.15884	0.331377	115.902	0.107159	0.333219	0.8442	0.33	0.4984	0.575	0.6336
TCGA-FD-A3B4-01A-12D-A203-05	BLCA	55	Cancer	0.667131	15856.1	0.29844	0.500439	130.632	0.145024	0.433551	0.7487	0.63	0.7461	0.8	0.7415
TCGA-DK-A6AW-01A-11D-A30F-05	BLCA	70	Cancer	0.862693	12005.5	0.22965	0.611435	147.126	0.449138	0.589147	0.9532		0.9073	0.8	0.9259
TCGA-DK-AA6U-01A-11D-A392-05	BLCA	64	Cancer	0.492836	3580.56	0.0950651	0.364572	116.004	0.364422	0.510031	0.9819		0.6822	0.75	0.836
TCGA-XF-A9SG-01A-12D-A42F-05	BLCA	81	Cancer	0.57802	7993.62	0.177143	0.424138	129.731	0.299101	0.494201				0.9
TCGA-CF-A3MH-01A-11D-A211-05	BLCA	75	Cancer	0.780884	9867.25	0.200403	0.560017	144.151	0.404734	0.666202	0.9776	0.95	0.5942	0.85	0.8633
TCGA-KQ-A41S-01A-12D-A33I-05	BLCA	87	Cancer	0.655391	15085.7	0.349725	0.534903	132.081	0.177287	0.392448	0.8247		0.7378	0.75	0.7266
TCGA-DK-AA6L-01A-11D-A392-05	BLCA	48	Cancer	0.616882	9199.29	0.207549	0.412742	137.834	0.374852	0.549945	0.8848		0.727	0.65	0.714
TCGA-E5-A4TZ-01A-11D-A31M-05	BLCA	64	Cancer	0.787724	10096.1	0.21276	0.511257	130.432	0.474634	0.618878	0.9799		0.6243	0.8	0.7466
TCGA-DK-A2HX-01A-12D-A18G-05	BLCA	80	Cancer	0.668309	11325.9	0.269314	0.476242	127.834	0.190537	0.397698	0.765	0.49	0.8454	0.7	0.7722
TCGA-ZF-AA4N-01A-11D-A38H-05	BLCA	74	Cancer	0.692522	12395.5	0.223524	0.501774	130.424	0.377317	0.532475	0.8693		0.6175	0.7	0.7019
TCGA-FD-A3SO-01A-11D-A231-05	BLCA	68	Cancer	0.625001	14089.1	0.303301	0.51439	131.061	0.138816	0.38536	0.7443		0.663	0.75	0.6387
TCGA-GU-A764-01A-11D-A34V-05	BLCA	66	Cancer	0.45425	8898.59	0.216154	0.347319	115.268	0.208378	0.405475	0.7319		0.4063	0.7	0.6464
TCGA-XF-AAN3-01A-11D-A42F-05	BLCA	76	Cancer	0.638005	18743	0.363218	0.508809	134.897	0.317767	0.539267	0.7867			0.75	0.756
TCGA-BT-A20J-01A-11D-A14Z-05	BLCA	75	Cancer	0.545119	7989.68	0.187089	0.406876	117.468	0.194655	0.418618	0.7465	0.4	0.3825	0.75	0.6043
TCGA-CF-A8HX-01A-11D-A365-05	BLCA	55	Cancer	0.823741	10105.6	0.202042	0.533865	129.7	0.619365	0.770773	0.9765		0.6729	0.92	0.836
TCGA-ZF-AA4R-01A-11D-A38H-05	BLCA	67	Cancer	0.608544	10335.8	0.242529	0.492782	131.3	0.20697	0.372724	0.8667		0.825	0.75	0.8292
TCGA-CU-A0YN-01A-21D-A10W-05	BLCA	60	Cancer	0.582742	10119.7	0.233943	0.443826	125.949	0.236897	0.447858	0.8114	0.4	0.544	0.815	0.6483
TCGA-BT-A20W-01A-21D-A14Z-05	BLCA	71	Cancer	0.543973	8480.62	0.202771	0.488946	130.202	0.293058	0.522956	0.8844		0.7368	0.7	0.7254
TCGA-BL-A13J-11A-13D-A10W-05	BLCA	65	Normal	0.0845147	668.034	0.0375298	0.100578	85.5166	0.0519409	0.177483
TCGA-KQ-A41P-01A-12D-A33I-05	BLCA	76	Cancer	0.464224	4810.1	0.105226	0.395137	130.667	0.537594	0.644288	0.843		0.749	0.75	0.7466
TCGA-XF-AAMG-01A-11D-A42F-05	BLCA	49	Cancer	0.657426	4839.28	0.114878	0.385458	94.1825	0.500511	0.598976	0.8916			0.7	0.8273
TCGA-BT-A42C-01A-11D-A23O-05	BLCA	64	Cancer	0.756868	14298	0.311847	0.601125	140.269	0.356325	0.512128	0.9776	0.65	0.7218	0.92	0.8523
TCGA-ZF-AA58-01A-12D-A42F-05	BLCA	61	Cancer	0.43635	7158.8	0.163312	0.323345	102.814	0.141441	0.39044	0.5464			0.9	0.5706
TCGA-ZF-A9R2-01A-11D-A392-05	BLCA	75	Cancer	0.731765	11304.7	0.240137	0.580919	139.65	0.377783	0.560933	0.9981		0.7365	0.8	0.8538
TCGA-YC-A89H-01A-11D-A365-05	BLCA	78	Cancer	0.619652	8287.48	0.187929	0.40003	119.477	0.327124	0.504299	0.8996		0.6552	0.75	0.7019
TCGA-FD-A5BT-01A-11D-A26N-05	BLCA	84	Cancer	0.393612	6544.43	0.15267	0.312908	107.354	0.0956121	0.319981	0.4328		0.4884	0.7	0.4335
TCGA-BL-A0C8-01A-11D-A276-05	BLCA	73	Cancer	0.691146	15713.8	0.345338	0.591912	133.269	0.392244	0.57129	0.923		0.832	0.823	0.8374
TCGA-XF-A9SY-01A-21D-A42F-05	BLCA	60	Cancer	0.391696	7601.5	0.147407	0.303498	102.991	0.142268	0.334192	0.6141			0.7	0.6612
TCGA-ZF-A9RN-01A-11D-A42F-05	BLCA	67	Cancer	0.765172	12675.2	0.238547	0.521138	121.079	0.323743	0.497205	0.8824			0.9	0.7987
TCGA-YF-AA3L-01A-11D-A38H-05	BLCA	47	Cancer	0.909677	23428	0.471152	0.684021	156.625	0.406439	0.557754	0.9571		0.8584	0.8	0.8684
TCGA-XF-A9SV-01A-21D-A42F-05	BLCA	82	Cancer	0.774226	15125.7	0.333822	0.609896	136.008	0.322254	0.603948	0.8639			0.7	0.8085
TCGA-XF-A9SL-01A-11D-A392-05	BLCA	69	Cancer	0.305848	5879.86	0.147418	0.263901	97.6066	0.0527907	0.206483	0.5568		0.4793	0.6	0.4229
TCGA-GU-A767-01A-11D-A32C-05	BLCA	81	Cancer	0.473819	5648.19	0.144766	0.387133	95.3208	0.0956813	0.247833	0.9073		0.7491	0.6	0.7466
TCGA-FD-A43P-01A-31D-A23V-05	BLCA	74	Cancer	0.579384	11684.5	0.252397	0.442589	121.617	0.152722	0.358748	0.7415		0.6379	0.9	0.6595
TCGA-ZF-AA4W-01A-12D-A38H-05	BLCA	56	Cancer	0.400165	4569.38	0.104675	0.257552	96.1034	0.146063	0.30173	0.9521		0.4265	0.6	0.7019
TCGA-ZF-A9RC-01A-11D-A38H-05	BLCA	77	Cancer	0.439314	2452.09	0.0694609	0.297319	97.1778	0.212605	0.403033	0.8845		0.796	0.6	0.795
TCGA-BT-A20U-01A-11D-A14Z-05	BLCA	70	Cancer	0.573598	14427.7	0.287879	0.449582	101.39	0.213756	0.414422	0.8796	0.47	0.6655	0.65	0.6251
TCGA-E7-A3Y1-01A-11D-A231-05	BLCA	57	Cancer	0.524628	5147.81	0.122814	0.430271	120.183	0.319386	0.524244	0.951		0.656	0.95	0.8806
TCGA-4Z-AA7W-01A-11D-A392-05	BLCA	55	Cancer	0.45118	8516.29	0.199446	0.362668	119.539	0.215821	0.428264	0.6281		0.3514	0.8	0.5054
TCGA-GV-A3JW-01A-11D-A211-05	BLCA	74	Cancer	0.779062	8935.38	0.180929	0.499712	97.4785	0.327939	0.488765	0.9878	0.83	0.7617	0.9	0.9153
TCGA-DK-A6AV-01A-12D-A30F-05	BLCA	82	Cancer	0.591551	7616.14	0.166149	0.451626	130.252	0.278582	0.438442	0.9192		0.6286	0.85	0.7019
TCGA-FD-A6TD-01A-51D-A33I-05	BLCA	77	Cancer	0.562158	10812	0.235487	0.431527	129.462	0.24849	0.441675	0.7139		0.5114	0.75	0.6219
TCGA-XF-A8HC-01A-11D-A365-05	BLCA	79	Cancer	0.937378	18490.1	0.420324	0.692468	147.689	0.30449	0.556826	0.9964		0.9276	0.8	0.9497
TCGA-ZF-A9R4-01A-11D-A38H-05	BLCA	83	Cancer	0.884444	17661.9	0.358859	0.692763	149.912	0.394848	0.552363	0.9546		0.7307	0.8	0.7183
TCGA-CF-A3MG-01A-11D-A211-05	BLCA	48	Cancer	0.859163	12275.2	0.240541	0.591877	135.607	0.496693	0.744726	0.9912		0.5683	0.9	0.7466
TCGA-XF-AAMJ-01A-11D-A42F-05	BLCA	70	Cancer	0.522689	15599.9	0.319556	0.446037	118.879	0.141889	0.403968	0.7174			0.9	0.7537
TCGA-2F-A9KT-01A-11D-A38H-05	BLCA	83	Cancer	0.515546	4791.42	0.116394	0.356187	109.686	0.272979	0.429473	0.9304		0.5451	0.65	0.7019
TCGA-K4-A54R-11A-11D-A26N-05	BLCA	59	Normal	0.142204	1372.74	0.0488327	0.153048	88.9997	0.0427284	0.196069
TCGA-ZF-AA5H-01A-11D-A392-05	BLCA	60	Cancer	0.614308	11281.2	0.232835	0.452634	142.393	0.429104	0.578254	0.7887		0.5267	0.9	0.6573
TCGA-FD-A6TI-01A-11D-A32C-05	BLCA	73	Cancer	0.704589	19444.1	0.399012	0.601004	136.688	0.341829	0.524341	0.9216		0.8107	0.85	0.8123
TCGA-ZF-A9RE-01A-11D-A38H-05	BLCA	78	Cancer	0.713756	9557.36	0.200764	0.51851	137.618	0.391662	0.561512	0.9814		0.6441	0.85	0.6165
TCGA-FD-A6TH-01A-11D-A32C-05	BLCA	63	Cancer	0.840351	18385.8	0.401654	0.632279	154.405	0.408292	0.611925	0.86		0.8073	0.7	0.8203
TCGA-XF-A9SW-01A-11D-A42F-05	BLCA	85	Cancer	0.50143	11744.3	0.26373	0.370114	105.082	0.0478453	0.171861	0.6147			0.7	0.6169
TCGA-GU-A762-01A-11D-A33I-05	BLCA	87	Cancer	0.57945	15933.9	0.334992	0.492981	133.059	0.174376	0.408656	0.5879		0.5062	0.7	0.4545
TCGA-CF-A27C-01A-11D-A16P-05	BLCA	52	Cancer	0.836125	7435.3	0.138563	0.466759	110.411	0.432965	0.599869	0.9868	0.99	0.6798	0.95	0.8696
TCGA-E7-A678-01A-11D-A30F-05	BLCA	55	Cancer	0.300633	2744.08	0.0869443	0.353673	113.19	0.273518	0.551375	0.972		0.6051	0.95	0.7913
TCGA-FD-A43U-01A-11D-A23V-05	BLCA	70	Cancer	0.518126	11735.9	0.253515	0.451367	120.733	0.184473	0.42739	0.5216		0.5251	0.8	0.4766
TCGA-DK-AA6T-01A-11D-A392-05	BLCA	63	Cancer	0.684926	15664.1	0.340766	0.570538	125.062	0.179546	0.585074	0.672		0.2127	0.65	0.5651
TCGA-SY-A9G0-01A-12D-A38H-05	BLCA	82	Cancer	0.455085	10733.3	0.241676	0.398541	106.884	0.137934	0.360124	0.7181		0.664	0.65	0.64
TCGA-FD-A62P-01A-32D-A30F-05	BLCA	76	Cancer	0.528497	7764.64	0.166588	0.405082	117.489	0.152201	0.331981	0.7681		0.6269	0.7	0.6956
TCGA-ZF-AA4X-01A-11D-A38H-05	BLCA	56	Cancer	0.761142	16886.8	0.3926	0.633177	138.565	0.248519	0.496891	0.9925		0.7722	0.9	0.7913
TCGA-BT-A42F-01A-11D-A23V-05	BLCA	64	Cancer	0.436938	10884.9	0.204068	0.419774	112.201	0.224479	0.455812	0.7157		0.4209	0.7	0.3542
TCGA-CU-A3YL-01A-11D-A231-05	BLCA	67	Cancer	0.761524	18688.6	0.37313	0.606588	128.413	0.299501	0.513766	0.9342		0.7026	0.95	0.8806
TCGA-GV-A3QI-01A-11D-A223-05	BLCA	47	Cancer	0.949177	17211	0.392815	0.62918	130.805	0.127351	0.300244	0.9952	0.95	0.9978	0.9	1
TCGA-G2-A2EC-01A-11D-A17Y-05	BLCA	58	Cancer	0.609073	16787.9	0.322375	0.502705	129.209	0.230881	0.450908	0.7767	0.27	0.694	0.7	0.5471
TCGA-XF-A9SH-01A-11D-A392-05	BLCA	65	Cancer	0.594545	9012.73	0.198477	0.491989	129.779	0.356819	0.619825	0.9223		0.5098	0.85	0.7913
TCGA-XF-AAME-01A-12D-A42F-05	BLCA	64	Cancer	0.2281	4470.21	0.0953606	0.240517	96.3539	0.0830927	0.262639	0.4476			0.65	0.4812
TCGA-CU-A0YN-11A-11D-A10W-05	BLCA	60	Normal	0.0687838	714.109	0.0394636	0.110413	84.4144	0.0546227	0.181985
TCGA-BT-A20N-11A-11D-A14Z-05	BLCA	72	Normal	0.102014	1521.93	0.0544823	0.134762	86.4962	0.0444201	0.189813
TCGA-DK-A1AG-01A-11D-A13Z-05	BLCA	65	Cancer	0.708834	9555.1	0.211869	0.530258	129.082	0.284911	0.488656	0.9625	0.92	0.6474	0.9	0.8308
TCGA-4Z-AA87-01A-11D-A392-05	BLCA	72	Cancer	0.609073	9103.16	0.198548	0.458176	130.287	0.438302	0.623738	0.8844		0.6399	0.9	0.6573
TCGA-XF-A8HF-01A-11D-A365-05	BLCA	80	Cancer	0.673501	10118.6	0.206268	0.441135	138.52	0.541516	0.645098	0.8593		0.6457	0.6	0.8195
TCGA-XF-AAN2-01A-11D-A42F-05	BLCA	73	Cancer	0.680555	12391.2	0.29119	0.521569	129.145	0.228264	0.419719	0.8693			0.65	0.8569
TCGA-GV-A3JZ-01A-11D-A21B-05	BLCA	55	Cancer	0.722496	7244.71	0.13853	0.416311	93.7986	0.269015	0.404412	0.8918	0.82	0.7888	0.9	0.8275
TCGA-KQ-A41N-01A-11D-A33I-05	BLCA	73	Cancer	0.378291	3383.84	0.0888024	0.290372	104.373	0.480253	0.550295	0.9738		0.5857	0.85	0.5479
TCGA-UY-A8OB-01A-12D-A42F-05	BLCA	63	Cancer	0.76582	14555	0.323108	0.516719	150.438	0.495468	0.641482	0.9172			0.75	0.8223
TCGA-E7-A677-01A-11D-A30F-05	BLCA	81	Cancer	0.844472	18534.6	0.3893	0.664197	147.926	0.26537	0.521116	0.9281		0.7019	0.9	0.836
TCGA-DK-AA6Q-01A-11D-A392-05	BLCA	61	Cancer	0.671928	15536.9	0.303418	0.51649	140.028	0.265829	0.480399	0.9045		0.6666	0.7	0.7466
TCGA-E7-A4IJ-01A-31D-A26N-05	BLCA	56	Cancer	0.591886	3792.26	0.102509	0.350313	117.821	0.344219	0.502473	0.9317		0.6773	0.8	0.836
TCGA-K4-A6FZ-01A-11D-A31M-05	BLCA	75	Cancer	0.627021	14703	0.312941	0.46257	124.377	0.18525	0.363267	0.8766		0.6405	0.7	0.843
TCGA-XF-A8HG-01A-11D-A365-05	BLCA	69	Cancer	0.822224	14793.7	0.349971	0.632422	143.379	0.637886	0.758796	0.9774		0.724	0.9	0.7466
TCGA-DK-A3IU-01A-11D-A211-05	BLCA	58	Cancer	0.499258	9197.14	0.202283	0.421016	121.752	0.203245	0.457828	0.4759	0.24	0.4399	0.9	0.3835
TCGA-FD-A6TG-01A-11D-A32C-05	BLCA	73	Cancer	0.557679	10845	0.245412	0.477728	121.17	0.235305	0.429911	0.7608		0.7032	0.75	0.686
TCGA-S5-A6DX-01A-11D-A31M-05	BLCA	83	Cancer	0.59193	11163.3	0.243342	0.450356	115.943	0.176052	0.421419	0.6615		0.5954	0.65	0.5592
TCGA-FD-A43S-01A-21D-A23V-05	BLCA	71	Cancer	0.316982	6658.53	0.140003	0.332572	94.5468	0.0669581	0.297567	0.5542		0.4666	0.6	0.4051
TCGA-4Z-AA7Q-01A-11D-A392-05	BLCA	79	Cancer	0.402642	8399.87	0.173771	0.383129	115.706	0.19533	0.391197	0.7727		0.407	0.75	0.7018
TCGA-DK-A1A3-01A-11D-A13Z-05	BLCA	60	Cancer	0.359485	4219.06	0.103129	0.324662	114.896	0.211558	0.379551	0.8058	0.42	0.6218	0.7	0.6238
TCGA-GU-A42Q-01A-11D-A23V-05	BLCA	67	Cancer	0.444212	3023.12	0.0968616	0.341125	94.0192	0.152403	0.320786	0.9703		0.6183	0.7	0.7466
TCGA-FD-A3NA-01A-11D-A21B-05	BLCA	60	Cancer	0.447995	4673.93	0.114926	0.330034	108.116	0.316257	0.504199	0.8508	0.43	0.5825	0.75	0.6586
TCGA-DK-A3IL-01A-11D-A211-05	BLCA	79	Cancer	0.770344	15188.3	0.331501	0.609423	143.062	0.2901	0.502118	0.9364	0.73	0.8215	0.9	0.84
TCGA-ZF-A9R7-01A-11D-A38H-05	BLCA	76	Cancer	0.682472	19805.6	0.38441	0.564865	136.22	0.366958	0.587525	0.7942		0.6182	0.75	0.731
TCGA-GV-A3QK-01B-11D-A23O-05	BLCA	56	Cancer	0.783676	18921.6	0.394626	0.651522	141.813	0.324654	0.558834	0.9018	0.7	0.7008	0.85	0.809
TCGA-GC-A6I3-01A-11D-A31M-05	BLCA	90	Cancer	0.576798	12092.5	0.242627	0.456035	128.283	0.247942	0.446902	0.7662		0.5977	0.75	0.6931
TCGA-XF-A9SX-01A-21D-A392-05	BLCA	63	Cancer	0.560557	14438.8	0.315886	0.461858	127.536	0.142976	0.344295	0.5986		0.6454	0.6	0.618
TCGA-G2-A2EL-01A-12D-A18G-05	BLCA	77	Cancer	0.491119	1922.14	0.0731595	0.344961	120.278	0.393543	0.532551	1	0.98	0.5373	0.8	0.8956
TCGA-DK-AA6X-01A-12D-A42F-05	BLCA	63	Cancer	0.450628	6841.6	0.166648	0.369854	109.815	0.195839	0.393866	0.861			0.6	0.8065
TCGA-DK-A1AD-01A-11D-A13Z-05	BLCA	69	Cancer	0.459192	2532.95	0.0793926	0.318126	115.178	0.579285	0.682323	0.8766	0.73	0.5764	0.8	0.849
TCGA-FD-A3SJ-01A-12D-A231-05	BLCA	59	Cancer	0.190051	2010.41	0.0576937	0.242712	90.8685	0.254239	0.404152	0.897		0.6797	0.75	0.8706
TCGA-FD-A6TC-01A-21D-A33I-05	BLCA	79	Cancer	0.635466	13265.3	0.266815	0.467439	129.949	0.330322	0.504732	0.8419		0.665	0.8	0.7913
TCGA-MV-A51V-01A-11D-A26N-05	BLCA	75	Cancer	0.638769	5001.17	0.114786	0.442529	125.803	0.317966	0.418583	0.9674		0.9477	0.9	0.9662
TCGA-XF-A9SJ-01A-11D-A392-05	BLCA	83	Cancer	0.575013	15094.8	0.310329	0.466167	130.622	0.196746	0.386657	0.7404		0.6188	0.75	0.658
TCGA-4Z-AA7M-01A-11D-A392-05	BLCA	65	Cancer	0.554402	4719.77	0.130298	0.35409	112.632	0.305361	0.45912	0.9394		0.598	0.7	0.836
TCGA-BL-A5ZZ-01A-31D-A30F-05	BLCA	80	Cancer	0.615848	7648.6	0.168066	0.368637	110.266	0.213856	0.442124	0.6778		0.7046	0.65	0.6876
TCGA-FJ-A3ZF-01A-11D-A23O-05	BLCA	73	Cancer	0.752999	6712.12	0.117435	0.45326	141.64	0.617533	0.716851	0.9919	0.9	0.8587	0.85	0.9342
TCGA-DK-A3IQ-01A-31D-A211-05	BLCA	74	Cancer	0.422715	6353.91	0.125251	0.321559	114.16	0.160575	0.386547	0.6652	0.35	0.7643	0.75	0.6289
TCGA-BT-A20R-01A-12D-A16P-05	BLCA	79	Cancer	0.4096	3206.88	0.0826436	0.273334	95.6379	0.283357	0.444278	0.7516	0.44	0.682	0.65	0.6672
TCGA-G2-A3VY-01A-11D-A231-05	BLCA	66	Cancer	0.867815	3455.24	0.104146	0.448688	93.8719	0.472498	0.535403	0.9955		0.9761	0.9	1
TCGA-XF-AAN7-01A-11D-A42F-05	BLCA	60	Cancer	0.866924	13815.2	0.315816	0.606927	125.718	0.415761	0.491387	0.8754			0.96	0.727
TCGA-FD-A5C1-01A-11D-A28N-05	BLCA	61	Cancer	0.544884	14074.9	0.280216	0.465987	125.285	0.225233	0.441061	0.6407		0.5447	0.75	0.5226
TCGA-FD-A43Y-01A-21D-A26N-05	BLCA	65	Cancer	0.481307	6554.9	0.125468	0.347209	115.535	0.213466	0.435977	0.8017		0.6184	0.65	0.7412
TCGA-E5-A4U1-01A-11D-A31M-05	BLCA	72	Cancer	0.838567	9395.57	0.212008	0.61622	127.134	0.361505	0.549444	0.9961		0.7589	0.9	0.7514
TCGA-E7-A7DV-01A-11D-A33I-05	BLCA	44	Cancer	0.421409	5135.94	0.119805	0.268107	123.505	0.304862	0.456566	0.5897		0.4041	0.92	0.3345
TCGA-DK-A1A6-01A-11D-A13Z-05	BLCA	53	Cancer	0.771298	15557.3	0.357557	0.608361	142.769	0.401701	0.587168	0.8413	0.72	0.7011	0.9	0.7485
TCGA-GD-A3OS-01A-12D-A223-05	BLCA	54	Cancer	0.657547	6776.63	0.127881	0.399276	93.9831	0.239117	0.455928	0.9064	0.72	0.5863	0.85	0.8184
TCGA-DK-AA6S-01A-21D-A392-05	BLCA	60	Cancer	0.552271	5674.68	0.140539	0.382364	118.405	0.230254	0.438568	0.71		0.6969	0.65	0.6166
TCGA-G2-AA3C-01A-21D-A392-05	BLCA	66	Cancer	0.482717	3778.51	0.113091	0.316473	117.35	0.265349	0.430048	0.6599		0.3684	0.8	0.5487
TCGA-FD-A5BU-01A-31D-A26N-05	BLCA	76	Cancer	0.484208	7464.53	0.14124	0.353616	98.5026	0.21743	0.406774	0.7143		0.5375	0.6	0.6226
TCGA-DK-A1AC-01A-11D-A13Z-05	BLCA	72	Cancer	0.586539	8009.73	0.165288	0.38367	92.6728	0.255721	0.429256	0.8025	0.68	0.6845	0.9	0.7444
TCGA-CF-A47W-01A-11D-A23V-05	BLCA	42	Cancer	0.349802	2803.98	0.0824379	0.303099	113.958	0.185133	0.442788	0.9774		0.8337	0.85	0.8394
TCGA-4Z-AA82-01A-11D-A392-05	BLCA	59	Cancer	0.551435	5244.79	0.127648	0.417856	107.64	0.231772	0.50669	0.8584		0.7504	0.65	0.7466
TCGA-DK-A6B1-01A-12D-A30F-05	BLCA	67	Cancer	0.876805	17633.3	0.369049	0.654595	143.24	0.27467	0.412414	0.9597		0.8683	0.8	0.8806
TCGA-CF-A7I0-01A-22D-A34V-05	BLCA	54	Cancer	0.444455	4419.56	0.0999524	0.308672	100.275	0.413427	0.555573	0.9003		0.6247	0.94	0.6126
TCGA-BT-A20W-11A-11D-A14Z-05	BLCA	71	Normal	0.25845	4004.44	0.0987763	0.254264	92.9153	0.0797137	0.286828
TCGA-XF-A8HD-01A-11D-A365-05	BLCA	77	Cancer	0.565328	11930.9	0.254655	0.432433	129.228	0.206533	0.376841	0.7841		0.6017	0.8	0.7173
TCGA-BT-A3PH-01A-11D-A223-05	BLCA	76	Cancer	0.858048	16182.6	0.371263	0.60245	156.455	0.713737	0.809304	0.9496	0.8	0.6566	0.9	0.8787
TCGA-K4-A5RJ-01A-11D-A28N-05	BLCA	75	Cancer	0.555997	9221.8	0.213109	0.43013	121.159	0.130981	0.313136	0.5153		0.4568	0.9	0.3964
TCGA-G2-AA3F-01A-12D-A42F-05	BLCA	77	Cancer	0.753962	11686.6	0.275637	0.5808	133.038	0.351868	0.557063	0.9588			0.75	0.7836
TCGA-GD-A3OQ-11A-21D-A223-05	BLCA	48	Normal	0.127542	1105.38	0.0432247	0.141965	86.9907	0.0439874	0.221022
TCGA-4Z-AA7N-01A-11D-A392-05	BLCA	65	Cancer	0.286601	6115.55	0.140098	0.291798	104.508	0.0729648	0.260931	0.5174		0.3087	0.6	0.3551
TCGA-G2-A2EF-01A-12D-A18G-05	BLCA	50	Cancer	0.669511	14131.4	0.294906	0.512071	137.562	0.321773	0.440959	0.7922	0.6	0.5327	0.75	0.7301
TCGA-E7-A541-01A-11D-A26N-05	BLCA	66	Cancer	0.692718	19591.7	0.419716	0.596491	140.943	0.321605	0.454584	0.8545		0.6951	0.8	0.7913
TCGA-FD-A5BV-01A-11D-A26N-05	BLCA	47	Cancer	0.72163	10011	0.197898	0.543544	145.676	0.511846	0.595377	0.9595		0.8099	0.7	0.8114
TCGA-2F-A9KQ-01A-11D-A38H-05	BLCA	69	Cancer	0.78536	4222.08	0.0992649	0.43428	103.148	0.617972	0.711719	0.9668		0.7028	0.75	0.7019
TCGA-DK-AA71-01A-31D-A392-05	BLCA	71	Cancer	0.774236	12482.3	0.276596	0.584909	123.848	0.137151	0.320341	0.9576		0.8337	0.75	0.9253
TCGA-ZF-AA51-01A-21D-A392-05	BLCA	69	Cancer	0.594037	11425.6	0.273718	0.474558	125.789	0.254572	0.396118	0.7539		0.6609	0.7	0.6573
TCGA-UY-A78P-01A-12D-A365-05	BLCA	78	Cancer	0.340516	3978.15	0.0995174	0.260083	98.3855	0.154214	0.354661	0.6788		0.2953	0.75	0.5743
TCGA-GU-A42R-01A-11D-A23O-05	BLCA	68	Cancer	0.680286	6099.07	0.130952	0.454813	86.8956	0.155203	0.289112	0.979		0.7917	0.8	0.79
TCGA-DK-A3IN-01A-11D-A211-05	BLCA	72	Cancer	0.410759	3704.34	0.0792077	0.249597	101.784	0.337244	0.508265	0.7415	0.38	0.5705	0.95	0.5266
TCGA-4Z-AA7R-01A-11D-A392-05	BLCA	73	Cancer	0.63946	3221.58	0.0787684	0.344007	101.519	0.606119	0.674104	0.957		0.7387	0.75	0.7277
TCGA-FD-A3SR-01A-11D-A231-05	BLCA	68	Cancer	0.687695	13316.7	0.293285	0.511212	133.884	0.184079	0.338094	0.7574		0.6825	0.7	0.6811
TCGA-FD-A3B3-01A-12D-A203-05	BLCA	74	Cancer	0.406598	6228.92	0.151478	0.329801	119.264	0.180228	0.397502	0.6191	0.21	0.3677	0.75	0.3269
TCGA-CF-A3MI-01A-11D-A211-05	BLCA	62	Cancer	0.671376	9291.79	0.184998	0.502963	122.908	0.485557	0.707384	0.9172	0.79	0.5449	0.9	0.8893
TCGA-DK-A3IS-01A-21D-A21B-05	BLCA	68	Cancer	0.378835	3128.01	0.0723599	0.30578	122.965	0.386414	0.58475	0.9744	0.9	0.6387	0.9	0.8612
TCGA-YF-AA3M-01A-11D-A42F-05	BLCA	57	Cancer	0.752053	14698.9	0.324677	0.599832	142.852	0.346737	0.527108	0.9621			0.75	0.8529
TCGA-G2-A3IE-01A-11D-A211-05	BLCA	51	Cancer	0.35709	3981.85	0.0951692	0.308687	100.943	0.352801	0.546469	0.954	0.69	0.6682	0.85	0.8489
TCGA-UY-A8OD-01A-11D-A365-05	BLCA	68	Cancer	0.582887	10819	0.233474	0.42563	132.988	0.357759	0.527839	0.7506		0.7172	0.75	0.7025
TCGA-UY-A9PB-01A-11D-A38H-05	BLCA	49	Cancer	0.519091	7902.3	0.179608	0.376863	124.769	0.232383	0.414803	0.6209		0.5544	0.75	0.5111
TCGA-XF-A9SP-01A-11D-A392-05	BLCA	59	Cancer	0.434942	6194.14	0.140368	0.342601	118.117	0.31533	0.430693	0.7258		0.6252	0.7	0.6382
TCGA-DK-A1AF-01A-11D-A13Z-05	BLCA	84	Cancer	0.240409	3605.85	0.0862149	0.242997	95.5504	0.0829739	0.282223	0.5903	0.98	0.499	0.7	0.6227
TCGA-FD-A6TF-01A-52D-A32C-05	BLCA	80	Cancer	0.511881	7747.72	0.178099	0.391526	119.821	0.136476	0.277854	0.8111		0.7218	0.7	0.754
TCGA-GD-A2C5-01A-12D-A17Y-05	BLCA	53	Cancer	0.63322	13497.9	0.300819	0.535606	140.55	0.419799	0.577936	0.8898		0.6545	0.85	0.6288
TCGA-GV-A3QF-01A-31D-A231-05	BLCA	79	Cancer	0.687834	14905.4	0.324301	0.520131	137.142	0.389363	0.493042	0.9785		0.431	0.9	0.7913
TCGA-BT-A20X-11A-12D-A16P-05	BLCA	56	Normal	0.102647	1252.8	0.0470392	0.134792	87.7382	0.0472398	0.210738
TCGA-XF-AAMQ-01A-11D-A42F-05	BLCA	59	Cancer	0.785958	19715.3	0.3441	0.587362	143.52	0.416693	0.627444	0.8462			0.8	0.7741
TCGA-FJ-A871-01A-11D-A34V-05	BLCA	49	Cancer	0.604753	6414.66	0.122313	0.388956	96.4006	0.24545	0.515021	0.949		0.9025	0.75	0.9202
TCGA-E7-A8O7-01A-11D-A365-05	BLCA	52	Cancer	0.689364	11329.5	0.236453	0.526637	125.916	0.165404	0.447869	0.9163		0.5871	0.9	0.8092
TCGA-CF-A47X-01A-31D-A23V-05	BLCA	60	Cancer	0.844729	11157	0.247811	0.552706	120.499	0.420427	0.554232	0.9819		0.6469	0.8	0.6198
TCGA-GD-A6C6-01A-21D-A31M-05	BLCA	64	Cancer	0.700631	3806.74	0.115139	0.45016	128.608	0.450341	0.612587	0.9341		0.8978	0.75	0.9147
TCGA-E7-A6ME-01A-22D-A32C-05	BLCA	75	Cancer	0.659508	7107.27	0.180083	0.480815	122.014	0.228867	0.396262	0.9574		0.7159	0.6	0.7913
TCGA-GD-A2C5-11A-11D-A17Y-05	BLCA	53	Normal	0.369242	7121.64	0.153319	0.339656	98.6745	0.160792	0.370211
TCGA-E5-A2PC-01A-11D-A203-05	BLCA	61	Cancer	0.410553	3024.19	0.0811586	0.283108	142.42	0.529708	0.584947	0.9381	0.82	0.7245	0.9	0.8812
TCGA-ZF-A9R5-01A-12D-A42F-05	BLCA	59	Cancer	0.47229	4310.96	0.113571	0.415137	125.146	0.390802	0.643787	0.9672			0.8	0.5213
TCGA-ZF-AA4V-01A-11D-A38H-05	BLCA	66	Cancer	0.715304	17637.3	0.340237	0.501571	131.434	0.336639	0.586068	0.8468		0.6879	0.85	0.7019
TCGA-G2-A3IB-01A-11D-A211-05	BLCA	66	Cancer	0.722069	13525.5	0.218243	0.500883	152.794	0.562399	0.723295	0.9585	0.92	0.539	0.8	0.8727
TCGA-DK-A3WY-01A-11D-A231-05	BLCA	67	Cancer	0.248816	4138.83	0.102728	0.262825	94.4007	0.0552798	0.238759	0.4202		0.2292	0.8	0.2232
TCGA-KQ-A41Q-01A-11D-A33I-05	BLCA	89	Cancer	0.696762	14534	0.33119	0.505836	140.159	0.393061	0.536324	0.9693		0.6546	0.85	0.7019
TCGA-DK-AA6R-01A-11D-A42F-05	BLCA	68	Cancer	0.560682	7767.75	0.148935	0.332337	130.061	0.300735	0.430216	0.9203			0.8	0.8021
TCGA-DK-AA6W-01A-12D-A392-05	BLCA	78	Cancer	0.611367	3669.37	0.0820381	0.339283	93.7521	0.272378	0.454423	0.9531		0.7451	0.65	0.7913
TCGA-BL-A3JM-01A-12D-A21B-05	BLCA	62	Cancer	0.730493	15539.2	0.378656	0.518645	124.208	0.22824	0.422598	0.9193	0.76	0.7276	0.8	0.8597
TCGA-XF-A9T5-01A-11D-A42F-05	BLCA	78	Cancer	0.629447	9718.8	0.1771	0.452531	96.7697	0.176833	0.438537	0.6724			0.75	0.5891
TCGA-XF-AAN5-01A-11D-A42F-05	BLCA	61	Cancer	0.594722	17846.4	0.349258	0.476575	115.244	0.113148	0.319631	0.8102			0.8	0.772
TCGA-UY-A78K-01A-11D-A33I-05	BLCA	60	Cancer	0.560457	12567.1	0.277575	0.470127	125.147	0.245182	0.434621	0.7759		0.4921	0.7	0.7019
TCGA-ZF-A9RG-01A-21D-A42F-05	BLCA	70	Cancer	0.49568	11339.9	0.234691	0.411938	120.277	0.127537	0.338956				0.8
TCGA-HQ-A5ND-01A-11D-A26N-05	BLCA	78	Cancer	0.559216	6927.36	0.151457	0.457419	128.374	0.405643	0.559165	0.9669		0.4802	0.8	0.7913
TCGA-LT-A8JT-01A-11D-A365-05	BLCA	69	Cancer	0.779245	15214.8	0.332552	0.626041	149.005	0.524708	0.693086	0.9453		0.6928	0.9	0.7913
TCGA-XF-A9SU-01A-31D-A392-05	BLCA	74	Cancer	0.424113	4711.62	0.118951	0.346759	103.278	0.156963	0.358339	0.7674		0.5743	0.7	0.6946
TCGA-BT-A20T-01A-11D-A14Z-05	BLCA	63	Cancer	0.619244	8597.05	0.176251	0.452783	112.173	0.189637	0.371949	0.8179	0.75	0.7776	0.75	0.7683
TCGA-ZF-AA4T-01A-11D-A38H-05	BLCA	65	Cancer	0.572191	8790.37	0.147541	0.331088	95.623	0.330712	0.458882	0.9744		0.5578	0.85	0.7913
TCGA-G2-A2EK-01A-22D-A18G-05	BLCA	57	Cancer	0.545048	5727.88	0.137621	0.365084	123.986	0.327146	0.495905	0.9129	0.55	0.5871	0.7	0.6932
TCGA-DK-A3X1-01A-12D-A231-05	BLCA	78	Cancer	0.402575	4387.41	0.0885956	0.327759	101.807	0.368942	0.520606	0.9052		0.6375	0.7	0.7466
TCGA-CU-A3QU-01A-11D-A231-05	BLCA	58	Cancer	0.945599	21847.2	0.498647	0.714616	154.008	0.480116	0.578149	0.9823		0.9018	0.99	0.9193
TCGA-BT-A20X-01A-11D-A16P-05	BLCA	56	Cancer	0.440543	5672.37	0.136301	0.336398	109.448	0.237547	0.477155	0.8607	0.37	0.5546	0.8	0.5125
TCGA-XF-AAMF-01A-21D-A42F-05	BLCA	68	Cancer	0.649655	14139.4	0.305063	0.537493	141.414	0.390327	0.553503				0.6
TCGA-FT-A61P-01A-11D-A30F-05	BLCA	76	Cancer	0.64244	13178.1	0.29373	0.504865	133.172	0.199425	0.374571	0.7028		0.7277	0.75	0.7148
TCGA-GC-A3WC-11A-11D-A231-05	BLCA	80	Normal	0.235641	4116.77	0.095727	0.250793	89.6354	0.0483493	0.236502
TCGA-GC-A3WC-01A-31D-A231-05	BLCA	80	Cancer	0.492874	7169.27	0.145206	0.352908	110.885	0.201399	0.378299	0.7462		0.5946	0.7	0.6126
TCGA-E7-A7PW-01A-11D-A34V-05	BLCA	63	Cancer	0.822656	15001.8	0.323613	0.542476	139.593	0.258455	0.451718	0.9771		0.839	0.8	0.9253
TCGA-XF-AAMH-01A-11D-A42F-05	BLCA	80	Cancer	0.788978	6910.17	0.145841	0.386668	94.7733	0.263217	0.373497	0.9612			0.75	0.8746
TCGA-CF-A1HS-01A-11D-A13Z-05	BLCA	75	Cancer	0.571225	9828.95	0.231967	0.481856	122.072	0.204392	0.45371	0.8701	0.55	0.631	0.65	0.6932
TCGA-FD-A6TE-01A-12D-A33I-05	BLCA	54	Cancer	0.828927	15394.3	0.329699	0.682583	145.309	0.270073	0.426457	0.9734		0.8059	0.85	0.8066
TCGA-XF-AAMT-01A-11D-A42F-05	BLCA	75	Cancer	0.386136	3900.97	0.0898356	0.288069	122.463	0.270028	0.396198	0.7057			0.65	0.7011
TCGA-XF-A8HB-01A-11D-A365-05	BLCA	50	Cancer	0.943693	27126.5	0.550299	0.716224	160.751	0.289596	0.543419	0.9849		0.8762	0.8	0.8893
TCGA-XF-AAN0-01A-11D-A42F-05	BLCA	68	Cancer	0.650742	11419.6	0.247631	0.439114	120.492	0.111912	0.248209	0.8392			0.85	0.7247
TCGA-DK-AA76-01A-11D-A392-05	BLCA	64	Cancer	0.582704	4152.82	0.0984506	0.411895	94.9673	0.381467	0.531436	0.9934		0.6986	0.6	0.7466
TCGA-FD-A62S-01A-11D-A30F-05	BLCA	60	Cancer	0.568318	10691.5	0.205377	0.414333	125.377	0.266991	0.455259	0.6153		0.6149	0.75	0.5822
TCGA-XF-AAMX-01A-11D-A42F-05	BLCA	87	Cancer	0.834493	16199.5	0.346572	0.616792	151.587	0.652274	0.75357	0.9089			0.8	0.8391
TCGA-FD-A3SP-01A-31D-A231-05	BLCA	60	Cancer	0.413103	6464.32	0.135704	0.360045	115.328	0.199539	0.41195	0.502		0.5705	0.7	0.53
TCGA-XF-A9T3-01A-11D-A42F-05	BLCA	69	Cancer	0.561214	9800.43	0.222135	0.420799	134.527	0.292042	0.414351	0.7488			0.65	0.708
TCGA-ZF-AA5N-01A-11D-A42F-05	BLCA	62	Cancer	0.726271	16836.9	0.343391	0.580154	147.299	0.436615	0.624789	0.9629			0.8	0.8311
TCGA-BL-A13I-01A-11D-A13Z-05	BLCA	57	Cancer	0.409218	4977.14	0.121583	0.331858	99.5909	0.173226	0.373342	0.5428	0.33	0.4801	0.5024	0.4498
TCGA-K4-A5RI-01A-11D-A28N-05	BLCA	67	Cancer	0.697408	10028	0.207794	0.528254	138.043	0.340398	0.50197	0.8989		0.7876	0.75	0.7852
TCGA-E7-A6MD-01A-41D-A34V-05	BLCA	66	Cancer	0.578362	10215.3	0.205725	0.442762	131.806	0.283603	0.495672	0.789		0.5525	0.7	0.724
TCGA-XF-A9SK-01A-11D-A42F-05	BLCA	65	Cancer	0.58403	10695.7	0.238668	0.430074	129.336	0.296409	0.501945	0.6944			0.7	0.6934
TCGA-LC-A66R-01A-41D-A30F-05	BLCA	78	Cancer	0.606138	13512.3	0.275006	0.4998	131.416	0.285334	0.472955	0.7826		0.5156	0.7	0.7153
TCGA-XF-AAML-01A-11D-A42F-05	BLCA	75	Cancer	0.776624	10599.8	0.254333	0.511272	132.177	0.201355	0.357647	0.9698			0.9	0.8357
TCGA-DK-A3IK-01A-32D-A21B-05	BLCA	87	Cancer	0.588223	9944.25	0.198479	0.454609	104.08	0.277031	0.486142	0.9072	0.5	0.729	0.75	0.8004
TCGA-ZF-A9RM-01A-11D-A38H-05	BLCA	70	Cancer	0.566066	5133.35	0.136389	0.506121	115.984	0.15259	0.409736	0.999		0.9095	0.95	0.9285
TCGA-XF-AAMW-01A-11D-A42F-05	BLCA	79	Cancer	0.609577	9488.23	0.20381	0.465788	111.863	0.298531	0.516383	0.8367			0.7	0.7454
TCGA-GV-A40E-01A-12D-A23O-05	BLCA	75	Cancer	0.644343	11310.2	0.201025	0.430961	127.564	0.301594	0.496572	0.8854	0.34	0.6247	0.85	0.6478
TCGA-DK-AA77-01A-11D-A392-05	BLCA	61	Cancer	0.605359	5410.61	0.124891	0.470353	114.226	0.382423	0.551022	0.9323		0.6901	0.75	0.836
TCGA-E7-A85H-01A-11D-A34V-05	BLCA	64	Cancer	0.738052	4883.73	0.145379	0.422068	90.5855	0.105087	0.237341	0.8759		0.8844	0.75	0.842
TCGA-XF-AAMR-01A-31D-A42F-05	BLCA	48	Cancer	0.393705	3707.09	0.0973226	0.312835	108.31	0.087806	0.258178	0.782			0.95	0.7082
TCGA-K4-A5RI-11A-11D-A28N-05	BLCA	67	Normal	0.306068	7099.6	0.1442	0.306616	107.943	0.0765428	0.292872
TCGA-FD-A3SM-01A-11D-A231-05	BLCA	70	Cancer	0.431745	2747.84	0.0800184	0.287418	104.136	0.388826	0.541732	0.86		0.6909	0.75	0.8204
TCGA-4Z-AA81-01A-11D-A392-05	BLCA	80	Cancer	0.695863	19061.1	0.379474	0.567661	142.115	0.412377	0.647463	0.9037		0.5554	0.75	0.7466
TCGA-DK-A3X2-01A-11D-A231-05	BLCA	85	Cancer	0.913452	12083.2	0.255231	0.613808	118.268	0.380705	0.515697	0.9924		0.6996	0.9	0.7466
TCGA-UY-A78M-01A-21D-A34V-05	BLCA	81	Cancer	0.621462	8694.26	0.17955	0.43176	118.973	0.363947	0.546686	0.9059		0.7265	0.7	0.7134
TCGA-GU-A766-01A-11D-A32C-05	BLCA	62	Cancer	0.437724	5663.4	0.143586	0.351448	115.181	0.135215	0.305459	0.6065		0.4519	0.65	0.4761
TCGA-ZF-AA5P-01A-11D-A392-05	BLCA	65	Cancer	0.249283	3901.29	0.0983331	0.25327	105.602	0.103718	0.290886	0.7422		0.458	0.9	0.6604
TCGA-XF-A8HH-01A-11D-A38H-05	BLCA	61	Cancer	0.595617	10671.2	0.226968	0.463091	128.148	0.297542	0.48955	0.831		0.6971	0.8	0.6788
TCGA-DK-A3IV-01A-22D-A21B-05	BLCA	60	Cancer	0.594716	8524.49	0.211109	0.444177	128.508	0.2418	0.51575	0.897	0.56	0.4607	0.9	0.6979
TCGA-DK-A3WW-01A-22D-A23O-05	BLCA	57	Cancer	0.636996	11594.2	0.222103	0.448644	99.7969	0.236455	0.440228	0.741	0.51	0.4663	0.6	0.6526
TCGA-XF-A9SI-01A-11D-A392-05	BLCA	73	Cancer	0.320704	6423.43	0.144731	0.315762	108.997	0.0837852	0.305341	0.5005		0.3801	0.8	0.3322
TCGA-DK-A6B5-01A-11D-A31M-05	BLCA	45	Cancer	0.252802	2701.33	0.0670394	0.321682	98.7357	0.403004	0.571053	0.8792		0.5928	0.8	0.7913
TCGA-C4-A0F0-01A-12D-A10W-05	BLCA	60	Cancer	0.576384	8330.91	0.154415	0.365864	132.667	0.32568	0.523333	0.8353	0.39	0.4877	0.75	0.5727
TCGA-XF-A9T0-01A-11D-A392-05	BLCA	68	Cancer	0.265917	3236.7	0.0762507	0.364121	103.119	0.336246	0.532892	0.8465		0.8181	0.8	0.802
TCGA-K4-A83P-01A-11D-A34V-05	BLCA	77	Cancer	0.341288	5717.21	0.132697	0.316571	99.2669	0.134677	0.385941	0.4936		0.3509	0.6	0.3228
TCGA-PQ-A6FI-01A-11D-A31M-05	BLCA	70	Cancer	0.0953519	838.36	0.0448092	0.285765	94.3905	0.326802	0.599049	0.9165		0.5543	0.75	0.6573
TCGA-XF-A8HI-01A-11D-A38H-05	BLCA	57	Cancer	0.666712	10754.7	0.217944	0.592908	113.396	0.287487	0.531783	0.955		0.6035	0.95	0.7466
TCGA-BT-A42E-01A-11D-A23V-05	BLCA	74	Cancer	0.648597	12930.4	0.279834	0.510977	137.07	0.290473	0.50891	0.7746		0.6169	0.7	0.7044
TCGA-G2-A2EO-01A-11D-A17Y-05	BLCA	69	Cancer	0.587307	13143	0.283496	0.468882	130.611	0.27623	0.490605	0.7265	0.38	0.6195	0.85	0.5554
TCGA-CF-A9FF-01A-11D-A38H-05	BLCA	52	Cancer	0.635663	9368.07	0.2017	0.511557	115.327	0.378718	0.566537	0.8896		0.6865	0.8	0.8606
TCGA-4Z-AA7O-01A-31D-A392-05	BLCA	64	Cancer	0.78246	11967.9	0.25214	0.573858	145.392	0.494187	0.667545	0.8723		0.486	0.8	0.7466
TCGA-UY-A9PD-01A-11D-A38H-05	BLCA	80	Cancer	0.690007	10104.1	0.210021	0.45144	118.994	0.542083	0.65568	0.8927		0.6355	0.75	0.8648
TCGA-XF-AAMZ-01A-11D-A42F-05	BLCA	81	Cancer	0.555395	12138.1	0.270218	0.436041	108.468	0.180367	0.411232	0.9246			0.85	0.9167
TCGA-GC-A3BM-11A-11D-A231-05	BLCA	70	Normal	0.244225	3759.5	0.0914992	0.22259	89.9152	0.0448912	0.219752
TCGA-UY-A9PA-01A-11D-A38H-05	BLCA	48	Cancer	0.416375	7946.15	0.171732	0.323062	108.343	0.1112	0.309107	0.9277		0.66	0.8	0.9123
TCGA-CF-A3MF-01A-12D-A21B-05	BLCA	34	Cancer	0.806442	15128.5	0.312513	0.65889	155.224	0.449159	0.763915	0.9581	0.77	0.6682	0.9	0.8868
TCGA-XF-A9T8-01A-11D-A392-05	BLCA	64	Cancer	0.534993	14901.7	0.300179	0.434444	123.793	0.197767	0.340012	0.6519		0.451	0.7	0.5378
TCGA-DK-A3IT-01A-31D-A211-05	BLCA	62	Cancer	0.574814	8646.92	0.192321	0.442985	118.739	0.257558	0.508256	0.8461	0.46	0.6706	0.7	0.6748
TCGA-XF-AAMY-01A-11D-A42F-05	BLCA	78	Cancer	0.594376	3831.03	0.0951597	0.371439	100.149	0.304576	0.459997	0.8392			0.75	0.7024
TCGA-GC-A3BM-01A-11D-A231-05	BLCA	70	Cancer	0.889096	12814.8	0.274508	0.622273	140.01	0.475761	0.630301	0.9569		0.7912	0.97	0.7913
TCGA-GV-A3JX-01A-11D-A211-05	BLCA	59	Cancer	0.890988	18521.4	0.440429	0.661728	148.152	0.366847	0.490553	0.9186	0.9	0.7999	0.9	0.8903
TCGA-4Z-AA7Y-01A-11D-A392-05	BLCA	60	Cancer	0.78941	12106	0.248729	0.595144	144.659	0.289528	0.55749	0.9794		0.6529	0.8	0.7466
TCGA-FD-A6TK-01A-42D-A33I-05	BLCA	60	Cancer	0.414651	8007.64	0.172925	0.376116	113.996	0.204722	0.422703	0.646		0.5429	0.75	0.5298
TCGA-K4-A3WU-01B-11D-A23O-05	BLCA	87	Cancer	0.512647	9063.37	0.195409	0.415221	111.377	0.157299	0.387439	0.7344	0.6	0.618	0.75	0.6908
TCGA-DK-A1AB-01A-11D-A13Z-05	BLCA	74	Cancer	0.281891	2149.23	0.072557	0.29332	97.9452	0.0754623	0.228209	0.7004	0.56	0.6385	0.75	0.6519
TCGA-G2-AA3B-01A-11D-A392-05	BLCA	75	Cancer	0.71669	17582.4	0.334574	0.584812	139.824	0.437458	0.59829	0.9576		0.6823	0.8	0.9521
TCGA-DK-A2I6-01A-12D-A18G-05	BLCA	81	Cancer	0.553604	4177.66	0.105885	0.399268	97.7858	0.369645	0.523182	0.9388	0.54	0.7287	0.7	0.709
TCGA-LT-A5Z6-01A-11D-A28N-05	BLCA	56	Cancer	0.749558	13772.2	0.274521	0.52859	132.397	0.252951	0.414144	0.9664		0.8294	0.65	0.8342
TCGA-GV-A6ZA-01A-12D-A33I-05	BLCA	54	Cancer	0.674885	9286.46	0.208309	0.508922	142.977	0.462935	0.564729	0.9379		0.6943	0.95	0.7466
TCGA-XF-A9ST-01A-11D-A42F-05	BLCA	68	Cancer	0.903171	18454.2	0.43528	0.662282	127.242	0.0807711	0.230918	0.9822			0.75	0.8665
TCGA-E7-A97Q-01A-11D-A38H-05	BLCA	60	Cancer	0.397881	4524.05	0.112468	0.375362	105.681	0.464463	0.630907	0.8563		0.6733	0.85	0.6508
TCGA-2F-A9KP-01A-11D-A38H-05	BLCA	66	Cancer	0.711338	11892.7	0.243145	0.525907	142.731	0.436455	0.593362	0.9843		0.7375	0.75	0.7263
TCGA-DK-A6B6-01A-11D-A30F-05	BLCA	57	Cancer	0.695151	10664.7	0.240686	0.537226	127.606	0.236907	0.407878	0.9166		0.7134	0.85	0.7913
TCGA-4Z-AA86-01A-11D-A392-05	BLCA	66	Cancer	0.500351	9585.63	0.223826	0.380699	124.338	0.170043	0.360588	0.6436		0.4652	0.9	0.5266
TCGA-E2-A1LH-01A-11D-A14H-05	BRCA_basal	59	Cancer	0.421308	5158.32	0.12288	0.350922	94.9735	0.110921	0.300707	0.5948	0.32	0.5637	0.8	0.4633
TCGA-A7-A5ZV-01A-11D-A28C-05	BRCA_basal	62	Cancer	0.780865	13226.1	0.333248	0.583012	134.56	0.138938	0.285672	0.8507		0.8126	0.7	0.8146
TCGA-B6-A3ZX-01A-11D-A23D-05	BRCA_basal	50	Cancer	0.302459	4727.73	0.11191	0.335123	95.2031	0.0606629	0.229208	0.5992		0.3608	0.75	0.4662
TCGA-A2-A0YE-01A-11D-A10A-05	BRCA_basal	48	Cancer	0.487736	4144.37	0.0916378	0.412472	91.7458	0.25964	0.399263	0.8864	0.66	0.7686	0.8	0.8224
TCGA-OL-A5D7-01A-11D-A27Y-05	BRCA_basal	70	Cancer	0.699689	19029.7	0.378275	0.551869	132.723	0.136233	0.327858	0.7671			0.85	0.7204
TCGA-A7-A6VV-01A-22D-A33F-05	BRCA_basal	51	Cancer	0.538299	6941.38	0.146142	0.409886	110.231	0.166135	0.360941	0.7001		0.7295	0.85	0.6841
TCGA-A2-A0T2-01A-11D-A10P-05	BRCA_basal	66	Cancer	0.65579	4457.03	0.118691	0.398184	98.7407	0.215991	0.302111	0.8286	0.82	0.858	0.825	0.8631
TCGA-A2-A3Y0-01A-11D-A23D-05	BRCA_basal	57	Cancer	0.463322	2999.6	0.0830629	0.351781	94.5903	0.166937	0.39502	0.7954		0.5975	0.95	0.7326
TCGA-A2-A0T0-01A-22D-A10P-05	BRCA_basal	59	Cancer	0.35816	820.295	0.0448962	0.23754	93.077	0.145329	0.328243	0.807	0.57	0.7	0.75	0.7259
TCGA-E2-A573-01A-11D-A29O-05	BRCA_basal	48	Cancer	0.459911	2131.61	0.0747262	0.300776	93.1055	0.120714	0.283498	0.7231		0.5552	0.7	0.6344
TCGA-A2-A3XY-01A-11D-A23D-05	BRCA_basal	49	Cancer	0.500783	6293.52	0.129603	0.355442	119.733	0.127134	0.342242	0.6294		0.5956	0.7	0.5595
TCGA-AR-A0U0-01A-11D-A10A-05	BRCA_basal	73	Cancer	0.554028	6846.76	0.136859	0.412138	102.151	0.177262	0.388813	0.7105	0.4	0.6092	0.775	0.5965
TCGA-GM-A3XL-01A-11D-A230-05	BRCA_basal	49	Cancer	0.62055	7333.56	0.166769	0.48466	128.734	0.0719639	0.234698	0.8213		0.7416	0.9	0.7311
TCGA-AO-A128-01A-11D-A10N-05	BRCA_basal	61	Cancer	0.411078	2451.02	0.0819705	0.269467	99.708	0.166758	0.343409	0.4731	0.27	0.4619	0.915	0.4024
TCGA-AR-A1AI-01A-11D-A12R-05	BRCA_basal	47	Cancer	0.499503	5720.28	0.127257	0.365089	100.697	0.29063	0.534021	0.7447	0.38	0.4858	0.95	0.5233
TCGA-E9-A1N8-01A-11D-A145-05	BRCA_basal	48	Cancer	0.790476	6213.31	0.115833	0.506933	94.9798	0.11716	0.303994	0.9422	0.95	0.9048	0.8	0.9275
TCGA-A2-A3XX-01A-21D-A23D-05	BRCA_basal	49	Cancer	0.56378	3659.69	0.09112	0.363651	95.9186	0.0688223	0.207543	0.8138		0.7889	0.88	0.7868
TCGA-AC-A62X-01A-11D-A29O-05	BRCA_basal	72	Cancer	0.880555	15299.2	0.326818	0.602876	139.371	0.128164	0.287597	0.9385		0.9714	0.8	0.9269
TCGA-D8-A27F-01A-11D-A16G-05	BRCA_basal	40	Cancer	0.506661	2222.77	0.0760249	0.340735	93.7632	0.142681	0.302544	0.8205	0.77	0.7686	0.7	0.8014
TCGA-E9-A5FL-01A-11D-A27Y-05	BRCA_basal	65	Cancer	0.465458	2386.51	0.0895779	0.306497	90.7256	0.140979	0.327517	0.7987			0.7	0.7866
TCGA-E2-A1B6-01A-31D-A12R-05	BRCA_basal	44	Cancer	0.280358	4114.23	0.0995425	0.275491	95.9525	0.0966807	0.345491	0.5796		0.2868	0.6	0.4396
TCGA-AR-A1AQ-01A-11D-A12R-05	BRCA_basal	49	Cancer	0.596541	10595.5	0.236466	0.42614	116.4	0.0846264	0.295605	0.6595	0.46	0.5729	0.93	0.5404
TCGA-AC-A6IW-01A-12D-A33F-05	BRCA_basal	73	Cancer	0.528132	8286.48	0.201557	0.390465	115.942	0.104319	0.26036	0.6552		0.5345	0.6	0.5423
TCGA-A2-A0ST-01A-12D-A10P-05	BRCA_basal	62	Cancer	0.346485	6337.6	0.131464	0.338331	103.834	0.10289	0.346421	0.4785	0.17	0.2972	0.875	0.3132
TCGA-AR-A0U4-01A-11D-A10A-05	BRCA_basal	54	Cancer	0.548813	8571.28	0.222641	0.416921	114.202	0.0657549	0.174148	0.5923	0.26	0.5037	0.775	0.4542
TCGA-E9-A1ND-01A-11D-A145-05	BRCA_basal	75	Cancer	0.500019	5793.83	0.119413	0.365707	116.332	0.21532	0.435378	0.5928	0.37	0.5402	0.9	0.5041
TCGA-A7-A4SD-01A-11D-A268-05	BRCA_basal	52	Cancer	0.323038	2787.68	0.080885	0.29871	100.536	0.321672	0.530189	0.7124		0.5356	0.95	0.4889
TCGA-A2-A25F-01A-11D-A16A-05	BRCA_basal	66	Cancer	0.331647	7197.49	0.155574	0.301658	99.3636	0.0886291	0.328626	0.2331	0.17	0.2672	0.75	0.2489
TCGA-AC-A8OQ-01A-11D-A41Q-05	BRCA_basal	72	Cancer	0.378765	7603.41	0.160443	0.383262	102.567	0.220348	0.464781	0.6534			0.82	0.5986
TCGA-OL-A5RW-01A-11D-A28C-05	BRCA_basal	40	Cancer	0.624196	2152.08	0.0719983	0.33265	85.1663	0.0705962	0.16307	0.8539		0.8516	0.8	0.8121
TCGA-A7-A4SE-01A-11D-A268-05	BRCA_basal	54	Cancer	0.385494	2479.99	0.0826402	0.361748	96.4057	0.138254	0.264834	0.7812		0.7986	0.65	0.7913
TCGA-AR-A0TU-01A-31D-A10A-05	BRCA_basal	35	Cancer	0.723272	8037.83	0.183311	0.492553	129.014	0.0727304	0.217845	0.8463	0.74	0.7177	0.93	0.8189
TCGA-GM-A2DF-01A-11D-A17Z-05	BRCA_basal	53	Cancer	0.447447	7840.03	0.178971	0.438434	105.717	0.186407	0.429105	0.6636	0.36	0.5373	0.95	0.529
TCGA-BH-A1F6-01A-11D-A13K-05	BRCA_basal	51	Cancer	0.571866	11514	0.235675	0.450831	113.498	0.0749228	0.227721	0.7299	0.44	0.6465	0.8	0.6316
TCGA-BH-A0B9-01A-11D-A10P-05	BRCA_basal	44	Cancer	0.518115	3979.55	0.0858266	0.348157	92.4628	0.0859467	0.237089	0.8057	0.62	0.5892	0.85	0.7243
TCGA-E2-A1LK-01A-21D-A14H-05	BRCA_basal	84	Cancer	0.80233	16902	0.38705	0.558219	138.2	0.254139	0.415118	0.9268	0.68	0.9268	0.9	0.8594
TCGA-A2-A3XU-01A-12D-A230-05	BRCA_basal	35	Cancer	0.786019	4241.87	0.112321	0.502867	90.1397	0.123289	0.34715	0.9695		0.8062	0.9	0.807
TCGA-BH-A0B3-01A-11D-A10P-05	BRCA_basal	53	Cancer	0.419336	3325.73	0.0821284	0.363638	100.146	0.16435	0.350067	0.7084	0.47	0.696	0.7	0.646
TCGA-EW-A1P8-01A-11D-A145-05	BRCA_basal	58	Cancer	0.424694	4153.82	0.0893559	0.306016	110.121	0.140377	0.303599	0.7366	0.68	0.5953	0.9	0.7303
TCGA-D8-A1JL-01A-11D-A13K-05	BRCA_basal	72	Cancer	0.4621	3612.23	0.0880368	0.367596	100.672	0.10548	0.305205	0.618	0.42	0.5139	0.85	0.4777
TCGA-B6-A0RE-01A-11D-A10P-05	BRCA_basal	61	Cancer	0.695447	8523.4	0.183885	0.498715	124.12	0.164522	0.278767	0.8821	0.64	0.779	0.8	0.7943
TCGA-AR-A1AJ-01A-21D-A12R-05	BRCA_basal	83	Cancer	0.404583	6242.15	0.139765	0.386437	101.534	0.0928241	0.285448	0.4576	0.32	0.4204	0.65	0.41
TCGA-B6-A409-01A-11D-A244-05	BRCA_basal	44	Cancer	0.550958	5164.37	0.121503	0.374971	101.095	0.196252	0.382857	0.8572		0.7748	0.75	0.7701
TCGA-LL-A8F5-01A-11D-A36K-05	BRCA_basal	61	Cancer	0.541725	4797.61	0.133151	0.436112	101.325	0.178448	0.317159	0.8021		0.7199	0.8	0.7056
TCGA-AR-A2LR-01A-12D-A18O-05	BRCA_basal	49	Cancer	0.578048	4044.38	0.112382	0.43818	115.505	0.104981	0.263372	0.8108	0.77	0.8507	0.6	0.87
TCGA-PL-A8LZ-01A-31D-A36K-05	BRCA_basal	29	Cancer	0.416767	5140.2	0.130178	0.319071	114.65	0.128153	0.288613	0.5602		0.5261	0.8	0.4779
TCGA-AO-A0JL-01A-11D-A10P-05	BRCA_basal	59	Cancer	0.790071	6722.67	0.176722	0.459607	111.243	0.203599	0.32518	0.8751	0.64	0.9529	0.825	0.8053
TCGA-E2-A1AZ-01A-11D-A12R-05	BRCA_basal	63	Cancer	0.623091	7106.54	0.136098	0.360874	121.538	0.138231	0.290625	0.6469	0.48	0.6883	0.8	0.6433
TCGA-E2-A1LL-01A-11D-A145-05	BRCA_basal	73	Cancer	0.598927	7118.83	0.176363	0.395533	129.105	0.297004	0.476474	0.9162	0.47	0.6721	0.75	0.6533
TCGA-AR-A24Q-01A-12D-A16A-05	BRCA_basal	49	Cancer	0.509985	4829.59	0.102085	0.387068	94.0578	0.147068	0.339585	0.7272	0.54	0.7509	0.75	0.6575
TCGA-C8-A1HJ-01A-11D-A13K-05	BRCA_basal	53	Cancer	0.449028	2879.53	0.0729291	0.322613	95.3577	0.174126	0.299265	0.8965	0.76	0.809	0.95	0.8699
TCGA-E2-A574-01A-11D-A29O-05	BRCA_basal	44	Cancer	0.820213	7756.08	0.162476	0.53124	106.422	0.251083	0.398435	0.9739		0.8418	0.7	0.8488
TCGA-BH-A1F0-01A-11D-A138-05	BRCA_basal	80	Cancer	0.333727	4324.35	0.0984494	0.275635	96.0789	0.143392	0.346165	0.4649	0.17	0.4529	0.85	0.358
TCGA-A2-A0YJ-01A-11D-A10A-05	BRCA_basal	39	Cancer	0.553978	4386.58	0.0963103	0.36393	97.7088	0.312286	0.491093	0.9298	0.55	0.7727	0.95	0.726
TCGA-E9-A22G-01A-11D-A161-05	BRCA_basal	47	Cancer	0.692547	4967.44	0.121605	0.402225	103.259	0.245615	0.317141	0.9314	0.9	0.9413	0.85	0.9416
TCGA-AO-A1KR-01A-12D-A145-05	BRCA_basal	51	Cancer	0.59391	13400.3	0.290955	0.488814	127.917	0.176952	0.335153	0.9107	0.41	0.6715	0.9	0.7423
TCGA-A2-A3XT-01A-11D-A230-05	BRCA_basal	45	Cancer	0.528865	3312.26	0.0930641	0.353766	92.9151	0.116798	0.269626	0.698		0.6838	0.85	0.6632
TCGA-A7-A26G-01A-21D-A16A-05	BRCA_basal	50	Cancer	0.388998	5836.15	0.129425	0.334796	102.016	0.154155	0.383073	0.5802	0.39	0.5481	0.6	0.5182
TCGA-S3-AA10-01A-21D-A41Q-05	BRCA_basal	65	Cancer	0.466602	5213.07	0.127315	0.387933	101.535	0.182042	0.395406	0.6305			0.6	0.6053
TCGA-BH-A0RX-01A-21D-A10P-05	BRCA_basal	59	Cancer	0.410771	5684.45	0.136378	0.344961	101.777	0.119065	0.338565	0.5273	0.18	0.4287	0.7	0.366
TCGA-E2-A14N-01A-31D-A138-05	BRCA_basal	37	Cancer	0.421292	5262.84	0.1158	0.348949	103.064	0.0739495	0.235124	0.8671	0.21	0.623	0.9	0.4769
TCGA-E2-A1LI-01A-12D-A161-05	BRCA_basal	57	Cancer	0.515685	9646.96	0.176311	0.385102	117.057	0.178942	0.341422	0.8356	0.37	0.5481	0.85	0.6505
TCGA-D8-A27M-01A-11D-A16G-05	BRCA_basal	59	Cancer	0.380873	5584.36	0.12798	0.360998	107.69	0.161904	0.408932	0.5652	0.45	0.5446	0.7	0.5446
TCGA-A2-A0SX-01A-12D-A10P-05	BRCA_basal	48	Cancer	0.422012	2992.87	0.0802052	0.331575	95.294	0.0756695	0.279762	0.6024	0.57	0.6486	0.75	0.6626
TCGA-B6-A400-01A-11D-A23D-05	BRCA_basal	43	Cancer	0.547502	2950.34	0.0927416	0.363189	96.6336	0.142071	0.321213	0.7638		0.7008	0.75	0.6898
TCGA-PL-A8LV-01A-21D-A41Q-05	BRCA_basal	54	Cancer	0.495113	3381.56	0.102345	0.385561	97.3479	0.105513	0.307842	0.8077			0.8	0.7256
TCGA-A2-A3XS-01A-11D-A230-05	BRCA_basal	62	Cancer	0.643407	6393.4	0.157187	0.501366	121.077	0.190575	0.338902	0.8091		0.7879	0.68	0.7855
TCGA-A7-A6VY-01A-12D-A33F-05	BRCA_basal	48	Cancer	0.630192	14750.2	0.317809	0.52113	130.638	0.172022	0.398146	0.6964		0.626	0.9	0.5982
TCGA-AN-A0XU-01A-11D-A10A-05	BRCA_basal	54	Cancer	0.606329	3374.41	0.070338	0.380536	93.0713	0.102512	0.298373	0.8716	0.61	0.8053	0.8	0.7875
TCGA-EW-A1PH-01A-11D-A14N-05	BRCA_basal	52	Cancer	0.758286	3249.83	0.103341	0.36914	97.2094	0.324768	0.503144	0.8852	0.76	0.7418	0.85	0.8229
TCGA-BH-A0E0-01A-11D-A10P-05	BRCA_basal	38	Cancer	0.595279	5788.59	0.129092	0.426288	99.5381	0.16478	0.263236	0.9013	0.57	0.7391	0.875	0.7486
TCGA-AQ-A54N-01A-11D-A268-05	BRCA_basal	51	Cancer	0.86792	10255.8	0.167002	0.569432	122.957	0.157916	0.257845	0.9545		0.8917	0.95	0.9075
TCGA-A7-A6VW-01A-21D-A33F-05	BRCA_basal	48	Cancer	0.599898	5492.16	0.143246	0.456847	117.24	0.128462	0.324216	0.82		0.8154	0.85	0.8178
TCGA-HN-A2NL-01A-11D-A18O-05	BRCA_basal	56	Cancer	0.771127	6582.63	0.148362	0.535727	100.358	0.149707	0.271467	0.8976	0.89	0.9024	0.8	0.8957
TCGA-B6-A1KF-01A-11D-A13K-05	BRCA_basal	68	Cancer	0.820819	7692.13	0.200363	0.489671	106.622	0.189741	0.308921	0.9298	0.81	0.9345	0.9	0.9309
TCGA-LL-A73Y-01A-11D-A33F-05	BRCA_basal	67	Cancer	0.394864	2853.55	0.079501	0.316156	90.4595	0.0696596	0.223242	0.7191		0.6323	0.8	0.629
TCGA-B6-A0X1-01A-11D-A10A-05	BRCA_basal	48	Cancer	0.437147	2626.41	0.0696502	0.323458	95.281	0.123793	0.311238	0.84	0.74	0.7358	0.8	0.8146
TCGA-D8-A27H-01A-11D-A16G-05	BRCA_basal	72	Cancer	0.636706	4967.32	0.124339	0.480124	90.2161	0.111774	0.267763	0.7931	0.75	0.8021	0.94	0.7659
TCGA-B6-A0RT-01A-21D-A10P-05	BRCA_basal	39	Cancer	0.310068	4031.86	0.0997228	0.284825	96.0453	0.0591847	0.227424	0.4189	0.23	0.3112	0.725	0.3032
TCGA-D8-A1XQ-01A-11D-A14N-05	BRCA_basal	69	Cancer	0.564776	3998.75	0.104014	0.366218	105.867	0.328215	0.464375	0.69	0.48	0.7135	0.9	0.6581
TCGA-S3-AA15-01A-11D-A41Q-05	BRCA_basal	51	Cancer	0.345167	7342.81	0.161772	0.36094	107.661	0.160779	0.405111	0.4665			0.6	0.5387
TCGA-A1-A0SP-01A-11D-A10P-05	BRCA_basal	40	Cancer	0.574742	5810.47	0.151867	0.44885	125.526	0.108889	0.30972	0.806	0.46	0.6603	0.725	0.6913
TCGA-EW-A1P4-01A-21D-A145-05	BRCA_basal	43	Cancer	0.438214	3531.12	0.0993195	0.355743	95.9076	0.106868	0.329911	0.7374	0.42	0.4967	0.8	0.6075
TCGA-LL-A5YP-01A-21D-A28C-05	BRCA_basal	49	Cancer	0.508865	4374.78	0.0985769	0.347441	110.882	0.118693	0.308756	0.6849		0.6935	0.75	0.6746
TCGA-B6-A402-01A-11D-A23D-05	BRCA_basal	47	Cancer	0.495602	2502.72	0.0703961	0.30689	91.7333	0.0729777	0.216978	0.9184		0.8939	0.9	0.8997
TCGA-A2-A1G1-01A-21D-A13K-05	BRCA_basal	85	Cancer	0.566823	9427.04	0.21399	0.459274	115.812	0.172859	0.400593	0.6622	0.42	0.6095	0.7	0.5685
TCGA-A2-A4RX-01A-11D-A268-05	BRCA_basal	67	Cancer	0.305654	4153.06	0.102543	0.387029	108.866	0.0846074	0.256191	0.7114		0.6966	0.65	0.6782
TCGA-OL-A6VO-01A-12D-A33F-05	BRCA_basal	43	Cancer	0.687752	5813.99	0.130431	0.420345	109.87	0.0816233	0.23054	0.8839		0.769	0.9	0.7633
TCGA-OL-A66I-01A-21D-A29O-05	BRCA_basal	36	Cancer	0.557829	11667.4	0.23688	0.41265	114.915	0.073291	0.269887	0.4829		0.5449	0.75	0.4999
TCGA-BH-A5IZ-01A-11D-A27Y-05	BRCA_basal	51	Cancer	0.61275	4554.26	0.118322	0.436661	125.333	0.135988	0.306313	0.8832			0.75	0.7992
TCGA-GI-A2C9-01A-11D-A21R-05	BRCA_basal	58	Cancer	0.674251	8164.02	0.181692	0.516455	132.416	0.142988	0.317605	0.8062	0.51	0.8386	0.8	0.6969
TCGA-AR-A256-01A-11D-A16A-05	BRCA_basal	45	Cancer	0.751665	14240.1	0.277092	0.540242	127.696	0.272398	0.398718	0.8485	0.73	0.6857	0.95	0.8204
TCGA-B6-A0RU-01A-11D-A10P-05	BRCA_basal	40	Cancer	0.418256	1771.29	0.0704543	0.336661	91.5802	0.0920654	0.238919	0.8751	0.51	0.8701	0.725	0.8273
TCGA-A1-A0SO-01A-22D-A10P-05	BRCA_basal	67	Cancer	0.867682	4159.7	0.123989	0.461531	88.1829	0.0877237	0.171578	0.9647	0.78	0.9776	0.9	0.9325
TCGA-B6-A0I1-01A-11D-A21R-05	BRCA_basal	73	Cancer	0.682009	5265.16	0.125921	0.376955	119.512	0.286949	0.472666	0.9614	0.77	0.7317	0.65	0.8198
TCGA-D8-A1XK-01A-21D-A14N-05	BRCA_basal	55	Cancer	0.503677	4170.7	0.109469	0.32588	100.388	0.0486789	0.177864	0.8387	0.46	0.5393	0.9	0.6505
TCGA-EW-A6SB-01A-12D-A32T-05	BRCA_basal	62	Cancer	0.557815	9175.43	0.211512	0.457019	121.46	0.178807	0.451537	0.7153		0.4378	0.95	0.6239
TCGA-AR-A1AY-01A-21D-A12R-05	BRCA_basal	65	Cancer	0.797207	9482.17	0.200743	0.528381	130.114	0.0687065	0.211333	0.8809	0.79	0.8585	0.8	0.8587
TCGA-D8-A1JK-01A-11D-A13K-05	BRCA_basal	90	Cancer	0.570228	6293	0.135823	0.343068	127.16	0.373254	0.520414	0.6372	0.41	0.6401	0.85	0.5818
TCGA-D8-A1JM-01A-11D-A13K-05	BRCA_basal	59	Cancer	0.780801	8314.28	0.220569	0.529372	129.717	0.0665908	0.203063	0.9414	0.86	0.8779	0.92	0.9111
TCGA-E2-A1LS-01A-12D-A161-05	BRCA_basal	46	Cancer	0.717203	7639.64	0.174046	0.524553	129.248	0.193618	0.339822	0.9125		0.9116	0.8	0.8917
TCGA-LL-A6FR-01A-12D-A31V-05	BRCA_basal	50	Cancer	0.585538	2392.21	0.0773491	0.354718	93.9438	0.188827	0.365131	0.8201		0.8368	0.75	0.843
TCGA-AR-A5QQ-01A-11D-A28C-05	BRCA_basal	68	Cancer	0.45241	8178.01	0.187202	0.389165	114.977	0.120265	0.338923	0.6173		0.436	0.9	0.4909
TCGA-AR-A1AR-01A-31D-A138-05	BRCA_basal	50	Cancer	0.57248	9574.93	0.227356	0.452865	124.71	0.0972727	0.308072	0.5912	0.53	0.5952	0.9	0.6122
TCGA-BH-A0WA-01A-11D-A10A-05	BRCA_basal	82	Cancer	0.563377	4022.06	0.092562	0.434981	107.869	0.214676	0.336363	0.8395	0.6	0.8241	0.9	0.7925
TCGA-OL-A5S0-01A-11D-A28C-05	BRCA_basal	66	Cancer	0.450806	3398.9	0.0831638	0.340636	90.0101	0.0758594	0.218258	0.7036		0.6785	0.6	0.657
TCGA-E2-A1LG-01A-21D-A14N-05	BRCA_basal	50	Cancer	0.404046	1861.6	0.0609485	0.32117	94.6853	0.159048	0.34041	0.9239	0.77	0.628	0.95	0.8421
TCGA-E2-A1II-01A-11D-A145-05	BRCA_basal	51	Cancer	0.466627	7692.75	0.154397	0.368362	117.183	0.160857	0.37121	0.6301	0.47	0.4514	0.95	0.5584
TCGA-AC-A2BK-01A-11D-A21R-05	BRCA_basal	78	Cancer	0.805865	6579.69	0.146593	0.523071	110.342	0.353303	0.471796	0.9739	0.86	0.9785	0.95	0.9767
TCGA-A2-A0YM-01A-11D-A10A-05	BRCA_basal	67	Cancer	0.732426	10748.1	0.239027	0.534319	129.763	0.0894319	0.206942	0.7678	0.58	0.7495	0.91	0.7266
TCGA-BH-A1FC-01A-11D-A13K-05	BRCA_basal	78	Cancer	0.660998	12823.6	0.264749	0.470673	105.415	0.0965012	0.256926	0.7615	0.49	0.6693	0.9	0.6517
TCGA-E9-A1NC-01A-12D-A161-05	BRCA_basal	61	Cancer	0.328608	5284.58	0.117011	0.357092	97.504	0.154174	0.39398	0.6507	0.41	0.5271	0.7	0.5439
TCGA-A7-A13E-01A-11D-A12R-05	BRCA_basal	62	Cancer	0.896683	17561.3	0.337706	0.629298	158.728	0.331021	0.513449	0.909	0.83	0.9772	0.85	0.9184
TCGA-AO-A129-01A-21D-A10N-05	BRCA_basal	29	Cancer	0.427198	4259.63	0.113987	0.326497	114.496	0.129435	0.240435	0.7257	0.35	0.6455	0.725	0.6281
TCGA-B6-A0WX-01A-11D-A10A-05	BRCA_basal	40	Cancer	0.524505	6517.74	0.153227	0.405279	90.6623	0.162849	0.326321	0.7083	0.34	0.7596	0.75	0.5499
TCGA-C8-A27B-01A-11D-A16A-05	BRCA_basal	48	Cancer	0.552973	5395.93	0.118263	0.410273	96.8326	0.160583	0.36532	0.7511	0.61	0.6656	0.9	0.7069
TCGA-E9-A3QA-01A-61D-A22B-05	BRCA_basal	33	Cancer	0.339918	5399.02	0.116096	0.341535	98.9577	0.110424	0.348964	0.6329	0.29	0.4486	0.9	0.475
TCGA-EW-A3U0-01A-11D-A22B-05	BRCA_basal	61	Cancer	0.497545	5438.5	0.121361	0.374229	95.5793	0.186494	0.451148	0.4819	0.41	0.4478	0.8	0.4688
TCGA-E9-A1N9-01A-11D-A14H-05	BRCA_basal	58	Cancer	0.620294	4918.03	0.125592	0.398368	98.6677	0.170813	0.370549	0.8333	0.48	0.8443	0.8	0.8101
TCGA-A7-A26I-01A-11D-A16A-05	BRCA_basal	65	Cancer	0.206579	1591.73	0.047387	0.295732	90.6161	0.106431	0.239668	0.7584	0.54	0.7949	0.8	0.7381
TCGA-EW-A1OW-01A-21D-A145-05	BRCA_basal	58	Cancer	0.56822	3667.28	0.0909709	0.376955	114.363	0.223267	0.403184	0.7943	0.66	0.7515	0.85	0.7657
TCGA-A1-A0SK-01A-12D-A10P-05	BRCA_basal	54	Cancer	0.835053	2496.07	0.0835867	0.383653	92.8696	0.0884662	0.199792	0.9902	0.95	0.8516	0.85	0.9288
TCGA-E9-A243-01A-21D-A16A-05	BRCA_basal	52	Cancer	0.333057	4231.88	0.0983286	0.284757	100.676	0.149511	0.35926	0.4336	0.34	0.367	0.8	0.3881
TCGA-E9-A244-01A-11D-A16A-05	BRCA_basal	54	Cancer	0.565464	6788.18	0.152512	0.440992	100.756	0.149186	0.278485	0.8787	0.46	0.7071	0.6	0.6448
TCGA-BH-A18V-06A-11D-A212-05	BRCA_basal	48	Cancer	0.457759	2433.52	0.0712757	0.333033	100.133	0.0869656	0.235475	0.6007		0.5537	0.95	0.6021
TCGA-AR-A251-01A-12D-A16A-05	BRCA_basal	51	Cancer	0.434678	2358.44	0.0661837	0.30482	92.2983	0.192241	0.368541	0.845	0.68	0.8328	0.85	0.8039
TCGA-A7-A26F-01A-21D-A16A-05	BRCA_basal	55	Cancer	0.589902	12253.2	0.286076	0.461431	122.79	0.172671	0.367018	0.6582	0.48	0.6677	0.8	0.6312
TCGA-S3-AA0Z-01A-11D-A41Q-05	BRCA_basal	63	Cancer	0.674313	5633.95	0.119273	0.434177	100.486	0.0827991	0.198652	0.7975			0.9	0.7187
TCGA-AO-A124-01A-11D-A10N-05	BRCA_basal	38	Cancer	0.208765	2616.89	0.058199	0.339736	100.62	0.433633	0.587308	0.9082	0.81	0.6698	0.725	0.8859
TCGA-EW-A1PB-01A-11D-A145-05	BRCA_basal	70	Cancer	0.448545	5846.91	0.119876	0.376012	113.64	0.169394	0.325771	0.6185	0.52	0.4851	0.9	0.4611
TCGA-AR-A0TP-01A-11D-A10P-05	BRCA_basal	43	Cancer	0.739284	3343.67	0.0952579	0.537776	105.013	0.127623	0.260649	0.9453	0.93	1	0.8	0.9681
TCGA-A7-A13D-01A-13D-A12R-05	BRCA_basal	46	Cancer	0.65838	4804.61	0.12745	0.445125	113.892	0.14268	0.254378	0.8887	0.55	0.8538	0.6	0.8612
TCGA-BH-A1F6-11B-94D-A13T-05	BRCA_basal	51	Normal	0.103864	365.214	0.0369171	0.143021	87.689	0.054844	0.203727
TCGA-BH-A0B3-11B-21D-A10Q-05	BRCA_basal	53	Normal	0.189068	842.32	0.0460939	0.212225	89.233	0.0806053	0.20712
TCGA-E2-A1LS-11A-32D-A161-05	BRCA_basal	46	Normal	0.0723453	-81.259	0.0318937	0.0822464	84.227	0.0580022	0.20601
TCGA-E9-A1N8-11A-42D-A145-05	BRCA_basal	48	Normal	0.096198	131.059	0.0338056	0.127814	87.8335	0.0597661	0.234631
TCGA-BH-A0E0-11A-13D-A10Q-05	BRCA_basal	38	Normal	0.14906	920.698	0.0509776	0.241632	88.4214	0.0742073	0.187118
TCGA-BH-A1F0-11B-23D-A138-05	BRCA_basal	80	Normal	0.189463	2355.59	0.0689051	0.202995	88.6431	0.0541152	0.208073
TCGA-E9-A1ND-11A-43D-A145-05	BRCA_basal	75	Normal	0.139602	652.243	0.0417333	0.170156	89.3285	0.053268	0.212874
TCGA-E2-A1LI-11A-23D-A161-05	BRCA_basal	57	Normal	0.248122	3995.78	0.0934652	0.241301	95.1796	0.0685375	0.234685
TCGA-A7-A13E-11A-61D-A12R-05	BRCA_basal	62	Normal	0.115832	743.505	0.0475848	0.144651	88.7357	0.0503142	0.180875
TCGA-E2-A1II-11A-21D-A145-05	BRCA_basal	51	Normal	0.134058	470.74	0.0394003	0.171529	88.5467	0.0554032	0.229568
TCGA-BH-A1FC-11A-32D-A13T-05	BRCA_basal	78	Normal	0.200805	2460.07	0.0745482	0.232761	90.5832	0.062369	0.239747
TCGA-A2-A0EU-01A-22D-A10P-05	BRCA_luminal	79	Cancer	0.653713	8819.92	0.172504	0.521169	136.45	0.267292	0.505171	0.8609	0.66	0.9304	0.75	0.84
TCGA-BH-A204-01A-11D-A161-05	BRCA_luminal	80	Cancer	0.82858	15313.6	0.351851	0.641547	143.437	0.338606	0.415565	0.8763	0.89	0.9364	0.85	0.9601
TCGA-LL-A50Y-01A-11D-A268-05	BRCA_luminal	84	Cancer	0.711589	10913.1	0.235454	0.56783	111.479	0.137977	0.289681	0.8042		0.872	0.8	0.7447
TCGA-E2-A2P5-01A-11D-A19Z-05	BRCA_luminal	78	Cancer	0.669698	14284.4	0.336305	0.592366	134.349	0.225224	0.375539	0.8291	0.6	0.8243	0.85	0.8034
TCGA-AO-A12C-01A-11D-A10N-05	BRCA_luminal	42	Cancer	0.762671	6838.04	0.170116	0.530249	144.703	0.150368	0.238577	0.7799		1	0.8	0.8583
TCGA-BH-A1FN-01A-11D-A13K-05	BRCA_luminal	34	Cancer	0.542421	2932.19	0.0769457	0.398251	119.968	0.170265	0.376972	0.8367	0.7	0.8509	0.75	0.8313
TCGA-EW-A6S9-01A-22D-A33F-05	BRCA_luminal	34	Cancer	0.615048	6798.23	0.148257	0.518078	119.657	0.184199	0.376376	0.8134		0.8852	0.8	0.7571
TCGA-A2-A0SU-01A-11D-A10P-05	BRCA_luminal	66	Cancer	0.493297	2408.74	0.0856068	0.322855	114.458	0.0818445	0.245238	0.8048	0.56	0.7977	0.89	0.7712
TCGA-E2-A1IN-01A-11D-A13K-05	BRCA_luminal	60	Cancer	0.604827	5926.71	0.129923	0.421622	98.625	0.258426	0.445226	0.7719	0.6	0.9009	0.85	0.7839
TCGA-AN-A0XN-01A-21D-A10A-05	BRCA_luminal	68	Cancer	0.706373	17760.9	0.412708	0.591305	132.5	0.076368	0.247217	0.5605	0.47	0.883	0.8	0.6999
TCGA-E9-A3Q9-01A-11D-A21R-05	BRCA_luminal	78	Cancer	0.477485	4835.52	0.131741	0.39208	139.431	0.396741	0.494745	0.7518	0.69	0.75	0.75	0.7072
TCGA-B6-A0WY-01A-11D-A10A-05	BRCA_luminal	40	Cancer	0.43727	5675.02	0.137798	0.4103	103.149	0.173767	0.263381	0.7823	0.25	0.8528	0.7	0.7754
TCGA-EW-A1J2-01A-21D-A13K-05	BRCA_luminal	50	Cancer	0.495957	8382.1	0.180586	0.463444	115.533	0.127572	0.300978	0.6677	0.52	0.774	0.8	0.7126
TCGA-E2-A56Z-01A-12D-A29O-05	BRCA_luminal	69	Cancer	0.726331	10241.9	0.218678	0.563952	138.843	0.231744	0.45844	0.9012		0.9317	0.9	0.8763
TCGA-C8-A26W-01A-11D-A16G-05	BRCA_luminal	58	Cancer	0.37123	3739.33	0.104313	0.340506	121.215	0.320836	0.512321	0.7304	0.64	0.7723	0.8	0.7058
TCGA-BH-A0H6-01A-21D-A10P-05	BRCA_luminal	82	Cancer	0.593736	4857.22	0.119672	0.397187	104.461	0.221132	0.431361	0.8294	0.76	0.9672	0.775	0.8311
TCGA-C8-A1HL-01A-11D-A138-05	BRCA_luminal	38	Cancer	0.707964	10167.3	0.225244	0.557833	156.448	0.37882	0.507704	0.7832	0.69	0.8964	0.95	0.8042
TCGA-AR-A2LE-01A-11D-A17Z-05	BRCA_luminal	69	Cancer	0.717738	10607.9	0.238114	0.566318	142.992	0.291856	0.469568	0.8426	0.74	0.865	0.92	0.8306
TCGA-D8-A1Y3-01A-11D-A161-05	BRCA_luminal	61	Cancer	0.774839	20452.1	0.455451	0.599153	134.671	0.214118	0.40969	0.7692	0.71	0.9304	0.9	0.8137
TCGA-E9-A1RA-01A-11D-A14H-05	BRCA_luminal	48	Cancer	0.490594	6322.46	0.150148	0.417483	107.713	0.0957525	0.287714	0.8124	0.38	0.6387	0.75	0.6829
TCGA-E9-A1RI-01A-11D-A16A-05	BRCA_luminal	43	Cancer	0.506128	8236.31	0.168476	0.466716	112.411	0.105792	0.269848	0.7201	0.59	0.8568	0.9	0.6764
TCGA-E9-A54X-01A-11D-A268-05	BRCA_luminal	85	Cancer	0.465614	3254.81	0.0908027	0.34488	104.016	0.142677	0.305964	0.9943		0.8824	0.9	0.8966
TCGA-BH-A0DH-01A-11D-A10P-05	BRCA_luminal	63	Cancer	0.79004	20106.6	0.444488	0.672481	149.125	0.362211	0.48786	0.8317	0.76	0.8955	0.85	0.8597
TCGA-BH-A0BF-01A-21D-A12R-05	BRCA_luminal	56	Cancer	0.5371	9428.81	0.209567	0.477752	114.5	0.152645	0.354131	0.4265	0.42	0.6079	0.55	0.5676
TCGA-XX-A89A-01A-11D-A36K-05	BRCA_luminal	68	Cancer	0.468665	4866.68	0.116534	0.356691	105.279	0.225781	0.42625	0.5118		0.6357	0.65	0.6067
TCGA-AR-A5QP-01A-11D-A28C-05	BRCA_luminal	54	Cancer	0.500652	8106.5	0.19799	0.450925	108.444	0.0694378	0.23956	0.8074		0.865	0.8	0.7489
TCGA-BH-A209-01A-11D-A161-05	BRCA_luminal	77	Cancer	0.487457	9355.93	0.189095	0.395355	106.558	0.109579	0.356934	0.5979	0.24	0.6243	0.6	0.4645
TCGA-LL-A5YM-01A-11D-A28C-05	BRCA_luminal	88	Cancer	0.772569	21967	0.494813	0.694285	145.366	0.197354	0.346959	0.8299		0.8812	0.9	0.8806
TCGA-AC-A3W6-01A-12D-A22B-05	BRCA_luminal	90	Cancer	0.500418	9388.85	0.214516	0.462866	116.069	0.12945	0.36331	0.5609	0.36	0.6597	0.8	0.5696
TCGA-BH-A1F2-01A-31D-A13K-05	BRCA_luminal	53	Cancer	0.629905	13574.8	0.279913	0.520976	134.925	0.338679	0.490757	0.7507	0.52	0.8661	0.6	0.754
TCGA-EW-A1IW-01A-11D-A13K-05	BRCA_luminal	80	Cancer	0.603814	14634.8	0.340765	0.537286	118.698	0.0823852	0.253115	0.7831	0.57	0.7847	0.7	0.7313
TCGA-BH-A0HP-01A-12D-A10P-05	BRCA_luminal	65	Cancer	0.595494	9611.35	0.227099	0.535841	131.668	0.120353	0.278773	0.7501	0.5	0.8952	0.775	0.6866
TCGA-AR-A24M-01A-11D-A16A-05	BRCA_luminal	38	Cancer	0.61806	8333.45	0.189214	0.471747	105.504	0.193926	0.333771	0.7678	0.67	0.9168	0.75	0.7982
TCGA-E2-A1IO-01A-11D-A145-05	BRCA_luminal	37	Cancer	0.447175	4994.92	0.117541	0.376317	102.111	0.207658	0.393401	0.6653	0.54	0.7621	0.7	0.715
TCGA-AR-A5QN-01A-12D-A28C-05	BRCA_luminal	68	Cancer	0.619495	16871	0.374009	0.536911	117.38	0.0656867	0.231421	0.7605		0.8252	0.6	0.7466
TCGA-GM-A3NW-01A-21D-A22B-05	BRCA_luminal	63	Cancer	0.697281	15213.3	0.353871	0.642643	138.775	0.222033	0.375319	0.8564	0.54	0.8596	0.75	0.7587
TCGA-E9-A22D-01A-11D-A161-05	BRCA_luminal	38	Cancer	0.584767	12904.9	0.291907	0.467189	125.426	0.144595	0.380021	0.5592	0.28	0.7285	0.85	0.5721
TCGA-Z7-A8R6-01A-11D-A41Q-05	BRCA_luminal	46	Cancer	0.639955	6788.65	0.142762	0.440876	113.799	0.294519	0.449084	0.8725			0.7	0.8143
TCGA-S3-A6ZH-01A-22D-A32T-05	BRCA_luminal	29	Cancer	0.737425	11202.6	0.233459	0.577178	149.917	0.329526	0.437031	0.8964		0.9252	0.85	0.8698
TCGA-AR-A24N-01A-11D-A16A-05	BRCA_luminal	54	Cancer	0.766779	17155.3	0.391641	0.638688	140.383	0.167968	0.34677	0.8116	0.77	0.915	0.85	0.8511
TCGA-BH-A0DD-01A-31D-A12R-05	BRCA_luminal	58	Cancer	0.812334	16488.7	0.330974	0.669329	154.502	0.280825	0.433886	0.8677	0.79	0.9459	0.625	0.8714
TCGA-EW-A1PF-01A-11D-A145-05	BRCA_luminal	50	Cancer	0.469026	5348.73	0.135357	0.370357	101.678	0.10516	0.307261	0.7149	0.45	0.6892	0.7	0.6464
TCGA-E2-A9RU-01A-11D-A41Q-05	BRCA_luminal	90	Cancer	0.847751	22360.4	0.535877	0.68167	140.53	0.19272	0.348271	0.8237			0.65	0.7365
TCGA-AQ-A0Y5-01A-11D-A14N-05	BRCA_luminal	70	Cancer	0.613374	13281.3	0.307817	0.511863	120.257	0.168402	0.373911	0.7399	0.5	0.887	0.425	0.7019
TCGA-B6-A0WT-01A-11D-A10A-05	BRCA_luminal	61	Cancer	0.525815	5952.32	0.1286	0.395477	130.171	0.218521	0.354822	0.8215	0.66	0.8759	0.7	0.7788
TCGA-E2-A1IG-01A-11D-A145-05	BRCA_luminal	45	Cancer	0.660943	12494.2	0.256706	0.550512	142.234	0.257677	0.388052	0.7766	0.77	0.8756	0.75	0.8399
TCGA-GM-A2DM-01A-11D-A17Z-05	BRCA_luminal	57	Cancer	0.376173	2853.59	0.0742451	0.315137	93.5965	0.0971039	0.281254	0.8489	0.72	0.7902	0.9	0.7968
TCGA-BH-A1ES-06A-12D-A244-05	BRCA_luminal	35	Cancer	0.628303	9012.59	0.195194	0.473181	107.466	0.145929	0.283887	0.9402		0.9493	0.9	0.9443
TCGA-OL-A5DA-01A-11D-A27Y-05	BRCA_luminal	61	Cancer	0.636063	10414	0.229157	0.595695	113.945	0.107333	0.280553	0.8457			0.85	0.8184
TCGA-D8-A27L-01A-11D-A16G-05	BRCA_luminal	49	Cancer	0.388223	4934.21	0.121469	0.355931	99.6297	0.189723	0.381008	0.6825	0.73	0.7273	0.6	0.7847
TCGA-E2-A3DX-01A-21D-A212-05	BRCA_luminal	43	Cancer	0.327068	5654.79	0.131149	0.353801	102.243	0.0945886	0.314441	0.508		0.6021	0.6	0.5672
TCGA-Z7-A8R5-01A-42D-A41Q-05	BRCA_luminal	61	Cancer	0.443012	7091.39	0.16931	0.400348	114.729	0.128065	0.26343	0.6923			0.7	0.6919
TCGA-BH-A1FD-01A-11D-A13K-05	BRCA_luminal	68	Cancer	0.742622	16876.2	0.403596	0.590618	128.946	0.185434	0.321791	0.7975	0.78	0.8877	0.85	0.8692
TCGA-A1-A0SQ-01A-21D-A145-05	BRCA_luminal	45	Cancer	0.748474	10070.3	0.223771	0.525284	137.386	0.316787	0.453514	0.8652	0.81	0.8406	0.825	0.8417
TCGA-D8-A1JU-01A-11D-A13K-05	BRCA_luminal	51	Cancer	0.399228	5076.12	0.120938	0.34209	97.9475	0.103966	0.28126	0.5899	0.43	0.7851	0.8	0.5122
TCGA-A7-A26H-01A-11D-A16A-05	BRCA_luminal	72	Cancer	0.619852	12176.3	0.250841	0.528847	117.662	0.180118	0.350242	0.7112	0.62	0.81	0.8	0.7811
TCGA-A2-A25E-01A-11D-A16A-05	BRCA_luminal	34	Cancer	0.608871	7654.3	0.177117	0.446329	137.643	0.196997	0.280448	0.8646	0.66	0.8358	0.85	0.8077
TCGA-E2-A1L6-01A-11D-A13K-05	BRCA_luminal	44	Cancer	0.505039	6403.6	0.154869	0.397147	116.018	0.17868	0.329801	0.8084	0.49	0.7904	0.65	0.689
TCGA-LL-A6FQ-01A-11D-A31V-05	BRCA_luminal	77	Cancer	0.778601	14229	0.304822	0.653921	152.61	0.358715	0.476181	0.8321		0.9508	0.75	0.7826
TCGA-E9-A1RD-01A-11D-A161-05	BRCA_luminal	67	Cancer	0.572103	7936.89	0.171166	0.453119	100.865	0.150571	0.304654	0.8155	0.65	0.9493	0.8	0.7696
TCGA-BH-A1FR-01A-11D-A13K-05	BRCA_luminal	73	Cancer	0.340753	3834.36	0.0935275	0.311934	117.157	0.190716	0.325998	0.8243	0.79	0.804	0.85	0.7881
TCGA-E9-A6HE-01A-11D-A31V-05	BRCA_luminal	45	Cancer	0.609732	10968.3	0.242089	0.536031	112.404	0.123485	0.238816	0.7413		0.8693	0.8	0.7019
TCGA-LD-A66U-01A-11D-A31V-05	BRCA_luminal	44	Cancer	0.508283	7475.92	0.1697	0.475682	124.845	0.144218	0.296941	0.695		0.7828	0.8	0.6126
TCGA-A1-A0SI-01A-11D-A145-05	BRCA_luminal	52	Cancer	0.540579	8233.25	0.198475	0.434622	126.079	0.250937	0.415689	0.6459	0.54	0.7557	0.75	0.6438
TCGA-BH-A0HN-01A-11D-A10P-05	BRCA_luminal	67	Cancer	0.797591	9353.73	0.205781	0.589845	113.747	0.280247	0.407046	0.9208		0.9841	0.95	0.903
TCGA-C8-A26V-01A-11D-A16G-05	BRCA_luminal	47	Cancer	0.700186	14636.2	0.302924	0.584784	143.492	0.179041	0.333186	0.8362	0.77	0.8646	0.95	0.8558
TCGA-A1-A0SF-01A-11D-A145-05	BRCA_luminal	54	Cancer	0.590317	9473.47	0.214096	0.488136	121.389	0.220982	0.397646	0.7593	0.44	0.7694	0.7	0.7237
TCGA-E9-A1NH-01A-11D-A14H-05	BRCA_luminal	71	Cancer	0.607346	8450.78	0.177707	0.474971	133.694	0.11727	0.269269	0.702	0.57	0.8662	0.9	0.7905
TCGA-E9-A229-01A-31D-A161-05	BRCA_luminal	37	Cancer	0.493573	4993.24	0.117149	0.38714	108.779	0.164929	0.308061	0.6442	0.59	0.8137	0.85	0.6898
TCGA-AR-A24Z-01A-11D-A16A-05	BRCA_luminal	57	Cancer	0.743405	10791.6	0.250863	0.584312	130.545	0.337806	0.465568	0.872	0.82	0.931	0.9	0.8886
TCGA-AC-A2FO-01A-11D-A17Z-05	BRCA_luminal	65	Cancer	0.482801	9321.32	0.214449	0.457906	121.986	0.186608	0.391312	0.6132	0.38	0.6879	0.6	0.5956
TCGA-A2-A0SY-01A-31D-A10P-05	BRCA_luminal	62	Cancer	0.711435	13635.7	0.306138	0.620465	128.136	0.118274	0.285558	0.6504	0.65	0.8569	0.75	0.8188
TCGA-A7-A426-01A-22D-A244-05	BRCA_luminal	50	Cancer	0.494478	7401.45	0.172822	0.46693	119.184	0.170787	0.309334	0.7741		0.8565	0.8	0.7037
TCGA-A2-A0YH-01A-11D-A10A-05	BRCA_luminal	53	Cancer	0.453423	3223.74	0.0776662	0.329129	105.009	0.333519	0.481473	0.6001	0.44	0.6585	0.75	0.6068
TCGA-A1-A0SM-01A-11D-A10P-05	BRCA_luminal	77	Cancer	0.673014	10927.9	0.260848	0.560794	122.726	0.0875832	0.169362	0.7538	0.59	0.8907	0.85	0.7903
TCGA-D8-A1XV-01A-11D-A14N-05	BRCA_luminal	84	Cancer	0.787872	17214.2	0.360612	0.697453	148.958	0.20738	0.369169	0.9338	0.69	0.9135	0.8	0.8689
TCGA-GM-A2DL-01A-11D-A18O-05	BRCA_luminal	50	Cancer	0.562845	12389.2	0.274512	0.478892	125.321	0.20949	0.422415	0.6925	0.54	0.7381	0.8	0.701
TCGA-E2-A15K-06A-11D-A12R-05	BRCA_luminal	58	Cancer	0.592812	3707.01	0.109342	0.346365	144.638	0.53876	0.624623	0.9466		0.844	0.95	0.8391
TCGA-GM-A5PX-01A-12D-A28C-05	BRCA_luminal	65	Cancer	0.507476	7448.38	0.171476	0.457986	119.291	0.135017	0.289721	0.7492		0.8322	0.7	0.7913
TCGA-E2-A15K-01A-11D-A12R-05	BRCA_luminal	58	Cancer	0.492933	4416.03	0.116984	0.336883	133.288	0.44654	0.560256	0.7425	0.7	0.724	0.9
TCGA-B6-A0RI-01A-11D-A10P-05	BRCA_luminal	44	Cancer	0.572992	5763.79	0.129685	0.415453	111.292	0.237498	0.376739	0.7798	0.76	0.9281	0.75	0.8374
TCGA-BH-A0W5-01A-11D-A10A-05	BRCA_luminal	77	Cancer	0.429084	6380.73	0.135332	0.398367	99.6202	0.130333	0.37696	0.5654	0.33	0.5894	0.75	0.514
TCGA-A2-A0EN-01A-13D-A10P-05	BRCA_luminal	70	Cancer	0.490541	7693.77	0.1731	0.46786	108.355	0.124055	0.309779	0.4879	0.41	0.6513	0.85	0.5883
TCGA-BH-A5J0-01A-11D-A27Y-05	BRCA_luminal	63	Cancer	0.641611	6807.33	0.174849	0.488244	115.657	0.306939	0.484008	0.5807			0.75	0.6386
TCGA-D8-A1X5-01A-11D-A14H-05	BRCA_luminal	81	Cancer	0.676259	14221.1	0.294494	0.5552	128.179	0.26052	0.388309	0.7346	0.57	0.8389	0.93	0.7027
TCGA-D8-A1XA-01A-11D-A14H-05	BRCA_luminal	64	Cancer	0.750994	11849.6	0.273012	0.570432	149.623	0.359827	0.469195	0.8269	0.84	0.915	0.95	0.8552
TCGA-A2-A1G0-01A-11D-A13K-05	BRCA_luminal	49	Cancer	0.380219	3282.94	0.0720044	0.331225	105.908	0.161403	0.349367	0.7103	0.5	0.7837	0.95	0.7088
TCGA-LL-A440-01A-11D-A244-05	BRCA_luminal	61	Cancer	0.356393	5757.45	0.147494	0.323359	103.826	0.0667087	0.228491	0.5285		0.6897	0.65	0.6702
TCGA-A1-A0SJ-01A-11D-A10P-05	BRCA_luminal	39	Cancer	0.687402	13172.7	0.283038	0.575266	105.587	0.120078	0.298209	0.8162	0.61	0.893	0.6	0.7984
TCGA-AR-A1AP-01A-11D-A12R-05	BRCA_luminal	80	Cancer	0.750574	15986.6	0.357202	0.648975	135.195	0.120606	0.242456	0.7475	0.7	0.8811	0.9	0.7471
TCGA-LL-A740-01A-21D-A32T-05	BRCA_luminal	61	Cancer	0.735603	18945.3	0.409465	0.574746	131.74	0.15339	0.257238	0.7304		0.8217	0.6	0.8253
TCGA-OL-A66H-01A-11D-A29O-05	BRCA_luminal		Cancer	0.52464	3694.16	0.108447	0.411504	104.136	0.186352	0.322059	0.6953		0.7798	0.7	0.7466
TCGA-A7-A6VX-01A-12D-A33F-05	BRCA_luminal	68	Cancer	0.724229	10073.1	0.208912	0.554709	125.949	0.225152	0.38291	0.8079		0.9559	0.6	0.7913
TCGA-A7-A3IY-01A-21D-A21R-05	BRCA_luminal	71	Cancer	0.378013	3904.07	0.106357	0.285751	113.427	0.115761	0.311057	0.6578	0.43	0.712	0.65	0.614
TCGA-E2-A572-01A-13D-A31V-05	BRCA_luminal	72	Cancer	0.558326	10514	0.247546	0.571793	144.133	0.248326	0.365607	0.9119		0.9286	0.8	0.8909
TCGA-A2-A4RW-01A-21D-A268-05	BRCA_luminal	49	Cancer	0.547016	10173.2	0.248773	0.466169	119.233	0.0677771	0.205224	0.7767		0.7663	0.6	0.7072
TCGA-BH-A1FL-01A-11D-A13K-05	BRCA_luminal	69	Cancer	0.719541	12272.2	0.252283	0.603373	133.047	0.211427	0.393755	0.8689	0.83	0.9371	0.9	0.8912
TCGA-E2-A106-01A-11D-A10N-05	BRCA_luminal	34	Cancer	0.716651	10376.2	0.232921	0.572813	119.533	0.21843	0.375244	0.9366		0.9579	0.75	0.9548
TCGA-E9-A1RF-01A-11D-A161-05	BRCA_luminal	68	Cancer	0.643645	15168.6	0.313336	0.512306	120.101	0.175595	0.319487	0.6743	0.49	0.865	0.75	0.6424
TCGA-A2-A0SV-01A-11D-A10P-05	BRCA_luminal	63	Cancer	0.680299	12298	0.290457	0.534172	132.656	0.175135	0.333585	0.6899	0.46	0.8205	0.925	0.6729
TCGA-BH-A0H9-01A-11D-A10P-05	BRCA_luminal	69	Cancer	0.182788	1449.33	0.0554785	0.283995	106.753	0.303987	0.455545	0.8872	0.35	0.7934	0.7	0.747
TCGA-AC-A23G-01A-11D-A212-05	BRCA_luminal	76	Cancer	0.454989	6717.98	0.157498	0.416947	101.931	0.1133	0.299113	0.5943	0.22	0.7556	0.65	0.5808
TCGA-E2-A576-01A-11D-A31V-05	BRCA_luminal	69	Cancer	0.791398	20097.1	0.417056	0.686119	147.924	0.179396	0.381054	0.8697		0.9499	0.7	0.9253
TCGA-A2-A0SW-01A-11D-A10P-05	BRCA_luminal	82	Cancer	0.707257	15801.3	0.309972	0.590795	136.95	0.345226	0.566056	0.6434	0.52	0.6541	0.915	0.6421
TCGA-BH-A0HA-01A-11D-A12R-05	BRCA_luminal	31	Cancer	0.679972	5800.5	0.136762	0.46099	95.0154	0.12684	0.258667	0.6418	0.74	0.9258	0.725	0.7386
TCGA-D8-A73X-01A-11D-A32T-05	BRCA_luminal	53	Cancer	0.665981	10373.7	0.210954	0.595862	117.394	0.0922057	0.2414	0.7993		0.9451	0.75	0.7466
TCGA-EW-A1J6-01A-11D-A13K-05	BRCA_luminal	70	Cancer	0.610688	5511.73	0.131185	0.450943	126.389	0.229251	0.393148	0.7885	0.78	0.8231	0.9	0.7751
TCGA-OL-A66L-01A-12D-A31V-05	BRCA_luminal	71	Cancer	0.668682	15833.2	0.347044	0.586784	125.908	0.149546	0.265115	0.6696		0.8258	0.75	0.6126
TCGA-A7-A13F-01A-11D-A12R-05	BRCA_luminal	44	Cancer	0.767812	17306	0.368189	0.679207	150.826	0.216997	0.322221	0.8478	0.65	0.9236	0.7	0.7915
TCGA-AR-A0TR-01A-11D-A10P-05	BRCA_luminal	68	Cancer	0.635495	7508.14	0.167247	0.570456	111.385	0.255147	0.422656	0.9479	0.74	0.9224	0.75	0.9022
TCGA-AR-A2LM-01A-11D-A17Z-05	BRCA_luminal	49	Cancer	0.52836	5109.9	0.125685	0.425246	103.886	0.124731	0.270035	0.7199	0.58	0.8597	0.75	0.7744
TCGA-EW-A1PC-01B-11D-A21R-05	BRCA_luminal	66	Cancer	0.835883	14424.1	0.34719	0.658763	148.225	0.426318	0.489417	0.9165	0.81	0.9722	0.85	0.914
TCGA-GM-A2DC-01A-11D-A18O-05	BRCA_luminal	57	Cancer	0.714608	12987.2	0.282445	0.580624	133.948	0.129122	0.253017	0.8951	0.71	0.9064	0.95	0.8654
TCGA-BH-A1FB-01A-11D-A13K-05	BRCA_luminal	60	Cancer	0.318424	3849.57	0.102006	0.319821	96.0925	0.0825796	0.275638	0.5766		0.6307	0.7	0.6007
TCGA-B6-A0X5-01A-21D-A10A-05	BRCA_luminal	61	Cancer	0.79786	10030.2	0.253085	0.440488	149.418	0.636406	0.705091	0.9169	0.89	0.7267	0.85	0.8977
TCGA-BH-A1EW-01A-11D-A138-05	BRCA_luminal	38	Cancer	0.610071	11271	0.251419	0.523091	124.861	0.094563	0.276683	0.7571	0.37	0.7537	0.8	0.5972
TCGA-AO-A0JF-01A-11D-A10P-05	BRCA_luminal	68	Cancer	0.438385	3218.25	0.083501	0.359508	96.3625	0.136112	0.276745	0.6007	0.74	0.7434	0.8	0.7511
TCGA-A2-A04R-01A-41D-A10A-05	BRCA_luminal	36	Cancer	0.774367	10795.2	0.286608	0.598698	132.051	0.35085	0.420144	0.9039	0.88	0.9982	0.925	0.9501
TCGA-D8-A1JP-01A-11D-A13K-05	BRCA_luminal	73	Cancer	0.667676	8355	0.209133	0.496062	109.074	0.110505	0.308631	0.6878	0.68	0.8274	0.75	0.8198
TCGA-E2-A1L7-01A-11D-A145-05	BRCA_luminal	40	Cancer	0.728928	13508.2	0.307882	0.603112	124.704	0.0613979	0.215705	0.7314	0.78	0.826	0.6	0.8555
TCGA-AO-A03M-01B-11D-A10N-05	BRCA_luminal	29	Cancer	0.45585	1927.61	0.0716546	0.321316	96.7111	0.142555	0.303058	0.7194	0.32	0.6925	0.8	0.6514
TCGA-LL-A7T0-01A-31D-A357-05	BRCA_luminal	70	Cancer	0.743726	12840.7	0.292083	0.585754	130.794	0.0998719	0.260671	0.8271		0.8545	0.6	0.836
TCGA-A2-A3KD-01A-12D-A212-05	BRCA_luminal	47	Cancer	0.46193	6068.09	0.132443	0.398642	104.695	0.107522	0.238059	0.8346	0.5	0.8544	0.9	0.8248
TCGA-AR-A1AK-01A-21D-A12R-05	BRCA_luminal	70	Cancer	0.561366	9707.04	0.22582	0.504307	131.115	0.12775	0.311	0.6167	0.46	0.823	0.8	0.5835
TCGA-W8-A86G-01A-21D-A36K-05	BRCA_luminal	66	Cancer	0.499015	6533.39	0.143902	0.456162	121.678	0.0993802	0.220947	0.884		0.9221	0.8	0.8806
TCGA-B6-A0RP-01A-21D-A10P-05	BRCA_luminal	73	Cancer	0.652957	6527.44	0.159031	0.480879	107.145	0.298541	0.437128	0.7279	0.55	0.8531	0.825	0.7733
TCGA-3C-AAAU-01A-11D-A41Q-05	BRCA_luminal	55	Cancer	0.521759	3923.64	0.117663	0.418774	128.228	0.326025	0.441273	0.9333			0.7	0.7886
TCGA-AR-A5QM-01A-11D-A27Y-05	BRCA_luminal	62	Cancer	0.613979	13032.6	0.298463	0.533576	125.363	0.165399	0.327326	0.6952			0.7	0.6158
TCGA-AC-A6IX-01A-12D-A32T-05	BRCA_luminal	49	Cancer	0.607622	9927.62	0.240762	0.535477	121.535	0.0976398	0.208548	0.689		0.7953	0.75
TCGA-AC-A6IX-06A-11D-A32T-05	BRCA_luminal	49	Cancer	0.512319	9004.93	0.210827	0.458388	116.845	0.0795349	0.232663	0.7012		0.5719	0.75	0.6047
TCGA-A2-A0YC-01A-11D-A10A-05	BRCA_luminal	59	Cancer	0.640856	9817.48	0.211338	0.524846	117.175	0.209665	0.341839	0.7667	0.65	0.8563	0.725	0.8188
TCGA-D8-A27I-01A-11D-A16G-05	BRCA_luminal	58	Cancer	0.442873	5725.61	0.151604	0.345464	112.031	0.126259	0.291224	0.6321	0.27	0.6958	0.85	0.5941
TCGA-EW-A1J3-01A-11D-A13K-05	BRCA_luminal	61	Cancer	0.726133	10281.1	0.223036	0.54935	137.681	0.190796	0.357381	0.8455	0.8	0.8772	0.9	0.8455
TCGA-BH-A0GZ-01A-11D-A10P-05	BRCA_luminal	62	Cancer	0.710036	10268.6	0.242967	0.568689	110.968	0.08357	0.216115	0.816	0.7	0.9383	0.825	0.7978
TCGA-A2-A25B-01A-11D-A16A-05	BRCA_luminal	39	Cancer	0.681173	9089.11	0.200898	0.480601	134.759	0.257406	0.351932	0.7639		0.8562	0.8	0.8657
TCGA-BH-A0DI-01A-21D-A12R-05	BRCA_luminal	63	Cancer	0.549786	11907.8	0.256834	0.488131	125.244	0.073489	0.270616	0.621	0.34	0.7418	0.575	0.5542
TCGA-3C-AALJ-01A-31D-A41Q-05	BRCA_luminal	62	Cancer	0.651249	12483.8	0.300482	0.569721	131.864	0.241326	0.362776	0.7364			0.65	0.7666
TCGA-E9-A2JT-01A-22D-A18O-05	BRCA_luminal	63	Cancer	0.373952	8995.54	0.198514	0.35644	102.948	0.0964334	0.352319	0.3947	0.32	0.2673	0.6	0.3275
TCGA-AR-A1AL-01A-21D-A12R-05	BRCA_luminal	60	Cancer	0.477135	6555.95	0.147073	0.389733	104.163	0.172238	0.357683	0.7376	0.42	0.8481	0.8	0.6334
TCGA-E2-A1IJ-01A-11D-A145-05	BRCA_luminal	57	Cancer	0.465352	7781.23	0.181501	0.426569	108.122	0.138017	0.325835	0.5805	0.61	0.6635	0.65	0.6903
TCGA-E9-A226-01A-21D-A161-05	BRCA_luminal	45	Cancer	0.470604	5635.97	0.125818	0.385896	102.924	0.189121	0.289486	0.8065	0.45	0.9492	0.65	0.7248
TCGA-BH-A0C3-01A-21D-A12R-05	BRCA_luminal	47	Cancer	0.44743	3220.34	0.0814617	0.266002	102.199	0.133929	0.306513	0.6289	0.39	0.7847	0.45	0.528
TCGA-E2-A1B1-01A-21D-A12R-05	BRCA_luminal	45	Cancer	0.297503	3137.28	0.0751407	0.276166	95.9566	0.0973762	0.313603	0.5675		0.7246	0.7	0.7112
TCGA-AO-A1KQ-01A-11D-A13K-05	BRCA_luminal	84	Cancer	0.52396	6060.68	0.137343	0.381294	120.418	0.325042	0.490898	0.7672	0.61	0.7333	0.9	0.7314
TCGA-A2-A1FZ-01A-51D-A14H-05	BRCA_luminal	63	Cancer	0.537476	11375.7	0.242868	0.463051	110.821	0.0920361	0.237534	0.6952	0.97	0.7663	0.75	0.7087
TCGA-AO-A03N-01B-11D-A10N-05	BRCA_luminal	59	Cancer	0.663167	5832.47	0.153872	0.507643	99.662	0.272813	0.467831	0.8407	0.64	0.9301	0.7	0.7942
TCGA-AC-A62V-01A-11D-A31V-05	BRCA_luminal	58	Cancer	0.819188	19810.5	0.464387	0.649842	150.5	0.354737	0.420846	0.8393		0.9193	0.7	0.7923
TCGA-BH-A1EO-01A-11D-A138-05	BRCA_luminal	68	Cancer	0.680115	13109.8	0.283879	0.535605	138.271	0.175879	0.373414	0.5849	0.48	0.8854	0.9	0.7493
TCGA-AR-A0U3-01A-11D-A10A-05	BRCA_luminal	59	Cancer	0.826035	18106.5	0.381671	0.65744	133.78	0.278133	0.384359	0.8954	0.79	0.943	0.775	0.8902
TCGA-A2-A0CR-01A-11D-A22B-05	BRCA_luminal	54	Cancer	0.480941	11361	0.251938	0.464676	116.653	0.116875	0.354481	0.4458		0.5355	0.75	0.4889
TCGA-GM-A2DA-01A-11D-A18O-05	BRCA_luminal	46	Cancer	0.472655	5480.74	0.150628	0.356709	124.469	0.326399	0.496423	0.6305	0.52	0.6607	0.85	0.646
TCGA-BH-A1F8-01A-11D-A13K-05	BRCA_luminal	90	Cancer	0.729081	11807.1	0.285147	0.602902	139.208	0.237406	0.455067	0.8414	0.78	0.8636	0.95	0.8885
TCGA-AO-A0JD-01A-11D-A10P-05	BRCA_luminal	59	Cancer	0.599748	6730.4	0.152918	0.420572	125.278	0.290484	0.438916	0.8938	0.45	0.7055	0.8	0.7512
TCGA-OL-A6VQ-01A-12D-A41Q-05	BRCA_luminal	49	Cancer	0.497106	7204.37	0.1585	0.42913	103.122	0.196073	0.293577				0.8
TCGA-BH-A28Q-01A-11D-A16G-05	BRCA_luminal	46	Cancer	0.690147	11043.4	0.23557	0.547332	136.405	0.120579	0.262495	0.8192	0.74	0.9137	0.8	0.8503
TCGA-BH-A2L8-01A-11D-A18O-05	BRCA_luminal	45	Cancer	0.44428	6517.76	0.150541	0.399192	116.271	0.0943742	0.316897	0.5823		0.5942	0.75	0.5579
TCGA-AN-A0XT-01A-11D-A10A-05	BRCA_luminal	54	Cancer	0.304018	4342.82	0.0974853	0.366783	110.756	0.302346	0.516271	0.8703	0.67	0.8526	0.8	0.8163
TCGA-OL-A66N-01A-12D-A31V-05	BRCA_luminal	59	Cancer	0.643815	11681.1	0.240785	0.541093	126.248	0.126094	0.305505	0.7293		0.8238	0.7	0.6573
TCGA-A7-A3J0-01A-11D-A212-05	BRCA_luminal	62	Cancer	0.322651	2529	0.0741835	0.310035	103.833	0.212743	0.425681	0.8924	0.87	0.8615	0.92	0.8681
TCGA-D8-A27T-01A-11D-A16G-05	BRCA_luminal	53	Cancer	0.574753	7735.18	0.178518	0.446958	119.062	0.279797	0.393969	0.6435	0.5	0.797	0.6	0.7142
TCGA-A2-A3KC-01A-11D-A212-05	BRCA_luminal	55	Cancer	0.576133	13826.6	0.28979	0.506285	120.583	0.097814	0.251655	0.7079	0.5	0.8378	0.75	0.7365
TCGA-E9-A1NA-01A-11D-A145-05	BRCA_luminal	58	Cancer	0.731407	19771.3	0.438903	0.631875	132.732	0.162887	0.295907	0.7071	0.61	0.8896	0.85	0.7216
TCGA-D8-A1JN-01A-11D-A13K-05	BRCA_luminal	80	Cancer	0.875479	14710.5	0.332541	0.679766	143.784	0.299621	0.482534	0.9215	0.94	0.9583	0.8	0.9449
TCGA-AC-A23C-01A-12D-A16A-05	BRCA_luminal	62	Cancer	0.576517	9671.5	0.224521	0.493209	111.431	0.159467	0.350153	0.7355	0.48	0.6805	0.85	0.6347
TCGA-AQ-A1H3-01A-31D-A13K-05	BRCA_luminal	49	Cancer	0.608541	12124.9	0.256538	0.502242	124.869	0.120562	0.296811	0.7464	0.59	0.7536	0.8	0.7233
TCGA-S3-AA14-01A-11D-A41Q-05	BRCA_luminal	47	Cancer	0.53648	6499.27	0.137883	0.434225	103.319	0.1898	0.313583	0.8095			0.8	0.7492
TCGA-E2-A1B5-01A-21D-A12R-05	BRCA_luminal	46	Cancer	0.454407	8059.79	0.200681	0.396213	116.738	0.074849	0.219616	0.5038	0.17	0.4464	0.8	0.3604
TCGA-EW-A1IZ-01A-11D-A13K-05	BRCA_luminal	53	Cancer	0.471944	11393.4	0.26222	0.440108	120.895	0.169329	0.392481	0.6161	0.29	0.4726	0.85	0.4635
TCGA-A2-A0YI-01A-31D-A10N-05	BRCA_luminal	62	Cancer	0.502854	7264.69	0.170531	0.478782	121.586	0.160363	0.328077	0.5931	0.44	0.7629	0.775	0.6682
TCGA-AO-A0JG-01A-31D-A10P-05	BRCA_luminal	49	Cancer	0.649772	10826.4	0.265587	0.550978	134.398	0.180801	0.342401	0.7066	0.54	0.7981	0.725	0.7331
TCGA-S3-AA11-01A-31D-A41Q-05	BRCA_luminal	67	Cancer	0.712595	10460.6	0.244173	0.553663	135.619	0.2053	0.266809	0.9296			0.6	0.7638
TCGA-UL-AAZ6-01A-11D-A41Q-05	BRCA_luminal	73	Cancer	0.886712	14790.2	0.325156	0.689904	121.465	0.296841	0.338699	0.9218			0.7	0.8031
TCGA-D8-A1XS-01A-11D-A14N-05	BRCA_luminal	48	Cancer	0.552153	6071.34	0.144541	0.453666	104.431	0.198803	0.381877	0.7709	0.74	0.8247	0.7	0.764
TCGA-AR-A255-01A-11D-A16A-05	BRCA_luminal	62	Cancer	0.616935	14337	0.33139	0.530135	126.462	0.24182	0.396345	0.6822	0.44	0.8054	0.85	0.6931
TCGA-BH-A1ES-01A-11D-A138-05	BRCA_luminal	35	Cancer	0.651308	7301.85	0.167178	0.480629	102.124	0.0903788	0.238468	0.8795	0.84	0.9917	0.65
TCGA-B6-A408-01A-12D-A244-05	BRCA_luminal	55	Cancer	0.610978	7545.58	0.165318	0.510886	122.399	0.253838	0.44835	0.6921		0.8016	0.75	0.8016
TCGA-EW-A1PA-01A-11D-A145-05	BRCA_luminal	59	Cancer	0.635473	11492.9	0.251731	0.515256	117.212	0.202396	0.384341	0.8288	0.64	0.7487	0.7	0.7739
TCGA-E9-A24A-01A-11D-A16A-05	BRCA_luminal	69	Cancer	0.42607	3640.81	0.0779555	0.305801	99.9939	0.138632	0.335186	0.6518	0.61	0.7247	0.88	0.7263
TCGA-A2-A0CT-01A-31D-A10P-05	BRCA_luminal	71	Cancer	0.898567	21915	0.461628	0.771926	149.267	0.186206	0.393357	0.8959	0.9	1	0.79	1
TCGA-AC-A8OS-01A-12D-A41Q-05	BRCA_luminal	71	Cancer	0.563268	10065.4	0.238349	0.491976	111.818	0.214966	0.400319	0.6667			0.85	0.6523
TCGA-A7-A13G-01A-11D-A13K-05	BRCA_luminal	79	Cancer	0.494689	3711.76	0.0974621	0.46991	94.7147	0.141445	0.305468	0.9066	0.87	0.9786	0.725	0.9357
TCGA-E2-A15J-01A-11D-A12R-05	BRCA_luminal	51	Cancer	0.828497	14041.9	0.289427	0.643653	146.331	0.133629	0.266195	0.8995	0.88	1	0.8	0.9356
TCGA-BH-A202-01A-11D-A14N-05	BRCA_luminal	60	Cancer	0.618381	9957.67	0.238231	0.480153	119.853	0.0859645	0.262567	0.7437	0.46	0.7058	0.7	0.6758
TCGA-AN-A0XS-01A-22D-A10A-05	BRCA_luminal	63	Cancer	0.548888	5602.68	0.130716	0.440218	109.81	0.242617	0.471149	0.665	0.48	0.8191	0.775	0.7201
TCGA-5T-A9QA-01A-11D-A41Q-05	BRCA_luminal	52	Cancer	0.875666	22983.5	0.496487	0.753636	145.808	0.118471	0.204712	0.9713			0.75	0.8368
TCGA-AR-A0TQ-01A-11D-A10P-05	BRCA_luminal	27	Cancer	0.656185	11221.2	0.254619	0.540091	131.121	0.132114	0.289223	0.7573	0.33	0.7431	0.7	0.7026
TCGA-BH-A0HI-01A-11D-A10P-05	BRCA_luminal	78	Cancer	0.539914	6373.68	0.145211	0.477007	97.7085	0.140287	0.293889	0.7785	0.7	0.8983	0.8	0.8536
TCGA-GM-A2D9-01A-11D-A18O-05	BRCA_luminal	69	Cancer	0.632159	10820.2	0.259509	0.574043	126.421	0.189748	0.332597	0.7818	0.73	0.8809	0.85	0.8679
TCGA-BH-A0BZ-01A-31D-A12R-05	BRCA_luminal	59	Cancer	0.689254	13961	0.332968	0.551528	137.486	0.167282	0.312405	0.5788	0.37	0.7363	0.6	0.5138
TCGA-E9-A54Y-01A-11D-A268-05	BRCA_luminal	63	Cancer	0.832811	17606.3	0.399237	0.673585	158.817	0.401526	0.491797			0.8708	0.7	0.8148
TCGA-A7-A2KD-01A-31D-A21R-05	BRCA_luminal	53	Cancer	0.599849	8172.88	0.172153	0.444109	125.475	0.323996	0.496425	0.6965	0.55	0.7953	0.8	0.6932
TCGA-E2-A1L8-01A-11D-A13K-05	BRCA_luminal	52	Cancer	0.564911	9340.55	0.198057	0.489937	106.594	0.309456	0.471936	0.7751	0.57	0.7872	0.85	0.7449
TCGA-E9-A1RC-01A-11D-A161-05	BRCA_luminal	56	Cancer	0.821578	14410.8	0.295766	0.627369	130.027	0.0879104	0.25308	0.9037	0.81	1	0.8	0.9053
TCGA-B6-A0RL-01A-11D-A10P-05	BRCA_luminal	60	Cancer	0.87869	25513.7	0.548349	0.806052	153.723	0.179108	0.367132	0.9936	0.84	0.994	0.775	0.9797
TCGA-AR-A0TZ-01A-12D-A10P-05	BRCA_luminal	43	Cancer	0.856718	17805.1	0.392816	0.713251	149.137	0.14362	0.270447	0.8674	0.76	1	0.7	0.8597
TCGA-BH-A42T-01A-11D-A244-05	BRCA_luminal	75	Cancer	0.74682	17018.3	0.372384	0.635289	134.635	0.108925	0.252204	0.7792		0.8615	0.9	0.7107
TCGA-AR-A1AS-01A-11D-A12R-05	BRCA_luminal	54	Cancer	0.756328	10790.6	0.219025	0.544662	117.322	0.300979	0.412737	0.8584	0.76	0.9527	0.9	0.8509
TCGA-A2-A259-01A-11D-A16G-05	BRCA_luminal	70	Cancer	0.392968	4169.3	0.108731	0.340321	97.9213	0.0986407	0.280947	0.7357	0.44	0.7769	0.85	0.6159
TCGA-LD-A74U-01A-13D-A33F-05	BRCA_luminal	79	Cancer	0.495167	9687.77	0.223595	0.43964	101.244	0.114806	0.285577	0.67		0.76	0.6	0.5623
TCGA-AR-A0U2-01A-11D-A10A-05	BRCA_luminal	47	Cancer	0.732536	9014.35	0.185339	0.50455	132.001	0.304404	0.471609	0.8606	0.67	0.7945	0.875	0.7958
TCGA-D8-A27G-01A-11D-A16G-05	BRCA_luminal	75	Cancer	0.624852	15798.8	0.344143	0.555062	128.765	0.156741	0.320805	0.6928	0.53	0.7636	0.85	0.706
TCGA-AR-A250-01A-31D-A16A-05	BRCA_luminal	58	Cancer	0.708131	16912.8	0.400521	0.619164	106.041	0.222053	0.393118	0.6616	0.43	0.8459	0.85	0.5916
TCGA-E2-A10F-01A-11D-A10N-05	BRCA_luminal	47	Cancer	0.656201	9630.93	0.222207	0.553607	119.477	0.116531	0.246323	0.625	0.53	0.837	0.7	0.706
TCGA-E2-A10C-01A-21D-A10N-05	BRCA_luminal	54	Cancer	0.720632	10955.4	0.243685	0.578703	110.147	0.324816	0.508317	0.7608	0.52	0.7659	0.8	0.6938
TCGA-E2-A1IU-01A-11D-A14H-05	BRCA_luminal	60	Cancer	0.481791	7138.15	0.160509	0.452395	121.015	0.234914	0.394184	0.8665	0.67	0.8215	0.6	0.8116
TCGA-A7-A3IZ-01A-11D-A212-05	BRCA_luminal	62	Cancer	0.83016	14751.6	0.360528	0.681806	138.265	0.267673	0.39646	0.9015	0.9	0.9152	0.88	0.9059
TCGA-EW-A6SA-01A-21D-A32T-05	BRCA_luminal	59	Cancer	0.948774	28274.1	0.624658	0.832973	158.751	0.197939	0.275217	0.9668		0.9785	0.8	0.9654
TCGA-BH-A1EY-01A-11D-A13K-05	BRCA_luminal	79	Cancer	0.579446	11510.3	0.260857	0.460165	119.179	0.147727	0.326846	0.6	0.51	0.6429	0.9	0.6308
TCGA-C8-A1HI-01A-11D-A138-05	BRCA_luminal	40	Cancer	0.556939	5157.43	0.123762	0.427719	113.275	0.113756	0.279847	0.8577	0.39	0.9439	0.8	0.675
TCGA-AO-A1KS-01A-11D-A13K-05	BRCA_luminal	69	Cancer	0.657001	7710.09	0.184982	0.564974	119.806	0.12504	0.268304	0.8335	0.64	0.9109	0.9	0.7771
TCGA-AN-A0XW-01A-11D-A10A-05	BRCA_luminal	36	Cancer	0.438189	2318.35	0.0835082	0.353686	101.675	0.165207	0.283682	0.5352	0.51	0.7588	0.825	0.6989
TCGA-B6-A0X7-01A-11D-A10N-05	BRCA_luminal	62	Cancer	0.676274	7897.52	0.172243	0.506642	120.67	0.107574	0.226926	0.821	0.58	0.9424	0.75	0.7458
TCGA-4H-AAAK-01A-12D-A41Q-05	BRCA_luminal	50	Cancer	0.605363	7088.14	0.160266	0.463546	121.112	0.169553	0.312799	0.7276			0.7	0.649
TCGA-D8-A1JJ-01A-31D-A14N-05	BRCA_luminal	54	Cancer	0.590591	10288.8	0.252091	0.514934	125.365	0.146932	0.358809	0.7562	0.43	0.7788	0.6	0.7272
TCGA-AR-A24K-01A-11D-A16A-05	BRCA_luminal	46	Cancer	0.785663	10895.2	0.234129	0.586253	136.105	0.116579	0.27442	0.913	0.78	0.9864	0.75	0.8974
TCGA-D8-A1JS-01A-11D-A13K-05	BRCA_luminal	77	Cancer	0.668842	6305.38	0.140559	0.529048	134.724	0.266246	0.425025	0.9501	0.91	0.9938	0.85	0.9714
TCGA-AR-A24P-01A-11D-A16A-05	BRCA_luminal	47	Cancer	0.604904	10140.5	0.213652	0.487164	123.157	0.0966425	0.237288	0.7653	0.64	0.853	0.8	0.7805
TCGA-AN-A0XV-01A-11D-A10A-05	BRCA_luminal	67	Cancer	0.671507	15551.9	0.354629	0.600343	130.502	0.157604	0.316758	0.7579	0.59	0.862	0.75	0.7121
TCGA-E9-A1R0-01A-22D-A16G-05	BRCA_luminal	58	Cancer	0.523066	10376	0.229357	0.447173	131.538	0.230352	0.373927	0.7683	0.51	0.727	0.65	0.7049
TCGA-BH-A0HY-01A-11D-A10P-05	BRCA_luminal	60	Cancer	0.839213	22227.3	0.486125	0.719382	120.584	0.133157	0.193977	0.8665	0.74	0.9768	0.85	0.8838
TCGA-D8-A1X8-01A-11D-A14N-05	BRCA_luminal	62	Cancer	0.542506	8051.31	0.186703	0.477491	116.034	0.175234	0.315016	0.7253	0.59	0.8059	0.9	0.7121
TCGA-D8-A27W-01A-11D-A16G-05	BRCA_luminal	55	Cancer	0.672308	10878.7	0.242328	0.517544	113.124	0.178648	0.38369	0.7927	0.45	0.7666	0.7	0.7155
TCGA-A7-A4SB-01A-21D-A268-05	BRCA_luminal	56	Cancer	0.533491	6516.67	0.143512	0.441384	131.622	0.269936	0.40124	0.8789		0.937	0.8	0.846
TCGA-AC-A6IV-01A-12D-A33F-05	BRCA_luminal	47	Cancer	0.444123	6628.75	0.165451	0.376982	113.429	0.104799	0.265944	0.4991		0.6469	0.6	0.6198
TCGA-GM-A3XN-01A-12D-A230-05	BRCA_luminal	44	Cancer	0.455655	5990.22	0.136042	0.412713	111.292	0.0868142	0.243591	0.6625		0.7417	0.82	0.7312
TCGA-B6-A0WZ-01A-11D-A10A-05	BRCA_luminal	50	Cancer	0.632721	9667	0.219053	0.55254	133.039	0.228324	0.370454	0.8882	0.63	0.9057	0.775	0.8586
TCGA-E2-A109-01A-11D-A10N-05	BRCA_luminal	64	Cancer	0.82888	18650.9	0.419697	0.676598	142.4	0.358095	0.49057	0.841	0.68	0.9237	0.9	0.8553
TCGA-OL-A6VR-01A-32D-A33F-05	BRCA_luminal	48	Cancer	0.435298	5868.22	0.137363	0.36162	105.615	0.124485	0.271911	0.9484		0.9641	0.75	0.9404
TCGA-E2-A1LA-01A-11D-A145-05	BRCA_luminal	59	Cancer	0.549249	7689.65	0.16208	0.395763	131.468	0.311151	0.469328	0.6582	0.56	0.6629	0.9	0.6662
TCGA-AN-A0XR-01A-11D-A10A-05	BRCA_luminal	55	Cancer	0.875504	19523.7	0.405211	0.733997	146.383	0.229976	0.307457	0.8987	0.86	1	0.825	0.9256
TCGA-D8-A27E-01A-11D-A16G-05	BRCA_luminal	66	Cancer	0.260283	1734.23	0.0668654	0.214016	98.2003	0.145318	0.322731	0.8554		0.7952	0.85	0.8092
TCGA-D8-A73U-01A-11D-A33F-05	BRCA_luminal	88	Cancer	0.449633	10931	0.233785	0.466766	104.085	0.142125	0.435018	0.3586		0.4716	0.65	0.4138
TCGA-A7-A425-01A-11D-A244-05	BRCA_luminal	70	Cancer	0.528354	6388.88	0.155299	0.457521	116.653	0.220693	0.388648	0.7181		0.8115	0.85	0.8133
TCGA-AC-A5XU-01A-11D-A28C-05	BRCA_luminal	74	Cancer	0.761621	16977	0.37924	0.635114	148.058	0.25789	0.425982	0.8301		0.8712	0.65	0.7798
TCGA-E2-A1IH-01A-11D-A13K-05	BRCA_luminal	80	Cancer	0.528708	6144.93	0.14584	0.426142	96.869	0.0993974	0.292949	0.5001	0.43	0.7404	0.75	0.4512
TCGA-5L-AAT1-01A-12D-A41Q-05	BRCA_luminal	63	Cancer	0.502845	10213.6	0.234193	0.447396	122.915	0.205023	0.34556	0.5897			0.6	0.5553
TCGA-C8-A3M8-01A-11D-A212-05	BRCA_luminal	68	Cancer	0.670592	17188.3	0.404204	0.578422	128.099	0.14355	0.293766	0.8724	0.67	0.8401	0.8	0.8177
TCGA-E9-A22A-01A-11D-A161-05	BRCA_luminal	74	Cancer	0.49419	9869.86	0.207341	0.414056	113.268	0.0896173	0.246481	0.5527	0.25	0.7796	0.6	0.5894
TCGA-A7-A0D9-01A-31D-A10P-05	BRCA_luminal	37	Cancer	0.608842	6175.02	0.130146	0.488515	118.644	0.207381	0.360057	0.8911	0.8	1	0.775	0.8921
TCGA-AC-A2FF-01A-11D-A17F-05	BRCA_luminal	40	Cancer	0.346985	4579.65	0.116878	0.305271	96.6896	0.0843757	0.292813	0.5705		0.6868	0.8	0.6667
TCGA-E2-A1IE-01A-11D-A13K-05	BRCA_luminal	61	Cancer	0.697034	11009.5	0.256044	0.548538	125.716	0.196692	0.305905	0.9388	0.71	0.9171	0.9	0.8817
TCGA-BH-A0H0-01A-11D-A10P-05	BRCA_luminal	69	Cancer	0.787376	7795.62	0.175924	0.482692	131.555	0.287307	0.382302	0.9131	0.88	0.9793	0.9	0.9449
TCGA-PE-A5DE-01A-11D-A27Y-05	BRCA_luminal	41	Cancer	0.550528	8017.11	0.182493	0.457096	115.401	0.238958	0.419643	0.5475			0.9	0.5043
TCGA-C8-A1HN-01A-11D-A138-05	BRCA_luminal	56	Cancer	0.777748	9863.7	0.222893	0.565139	114.307	0.183	0.349768	0.8565	0.72	0.8647	0.9	0.8408
TCGA-AQ-A04H-01B-11D-A10N-05	BRCA_luminal	61	Cancer	0.86802	24265.4	0.565	0.766175	154.105	0.309074	0.459134	0.8915	0.72	0.9464	0.85	0.8719
TCGA-BH-A1EU-01A-11D-A138-05	BRCA_luminal	83	Cancer	0.415308	6220.73	0.143229	0.418835	98.4948	0.128662	0.338372	0.5387	0.33	0.6869	0.65	0.4299
TCGA-B6-A40C-01A-11D-A23D-05	BRCA_luminal	51	Cancer	0.72492	13861.7	0.287875	0.626105	136.963	0.203635	0.364716	0.7494		0.8645	0.8	0.7913
TCGA-B6-A0WW-01A-11D-A10A-05	BRCA_luminal	58	Cancer	0.724437	13862.9	0.322033	0.601537	140.993	0.223057	0.326333	0.8509	0.73	0.9126	0.775	0.8315
TCGA-PL-A8LX-01A-11D-A41Q-05	BRCA_luminal	35	Cancer	0.623776	8870.65	0.205056	0.499324	134.953	0.143182	0.290416	0.8729			0.8	0.8593
TCGA-E9-A1R5-01A-11D-A14N-05	BRCA_luminal	63	Cancer	0.697037	13110.7	0.291904	0.599164	130.307	0.11456	0.302522	0.8303	0.7	0.916	0.8	0.8536
TCGA-A2-A0CK-01A-11D-A22B-05	BRCA_luminal	60	Cancer	0.592116	6919.2	0.165019	0.510594	115.422	0.103079	0.262772	0.7783	0.52	0.8739	0.75	0.7057
TCGA-BH-A0HX-01A-21D-A10P-05	BRCA_luminal	54	Cancer	0.700196	8738.85	0.199907	0.547219	108.67	0.214284	0.335739	0.7994	0.6	0.8939	0.7	0.7759
TCGA-E9-A22B-01A-11D-A161-05	BRCA_luminal	71	Cancer	0.642997	13181.1	0.29669	0.510095	112.006	0.110861	0.249336	0.7545	0.5	0.9064	0.75	0.7789
TCGA-A7-A4SA-01A-11D-A268-05	BRCA_luminal	40	Cancer	0.391523	3948.84	0.102734	0.306487	98.5995	0.222188	0.367115	0.6506		0.7207	0.75	0.7065
TCGA-AC-A3TN-01A-11D-A22B-05	BRCA_luminal	75	Cancer	0.733508	11895.3	0.28468	0.647388	127.744	0.1559	0.293689	0.8557	0.79	0.9411	0.7	0.8632
TCGA-B6-A40B-01A-11D-A23D-05	BRCA_luminal	76	Cancer	0.670329	14141	0.328344	0.588819	126.765	0.172784	0.338856	0.8149		0.8506	0.75	0.7592
TCGA-BH-A0B6-01A-11D-A19Z-05	BRCA_luminal	47	Cancer	0.495036	8765.74	0.192907	0.432292	101.337	0.146834	0.325084	0.4849	0.31	0.5773	0.575	0.4975
TCGA-A2-A1FX-01A-11D-A13K-05	BRCA_luminal	61	Cancer	0.654232	12565.7	0.287314	0.544969	141.816	0.323537	0.488135	0.7609	0.72	0.8233	0.9	0.8364
TCGA-C8-A1HG-01A-11D-A138-05	BRCA_luminal	50	Cancer	0.513059	4070.32	0.108299	0.344094	100.016	0.238693	0.445072	0.7173	0.49	0.6601	0.9	0.6315
TCGA-AC-A6NO-01A-12D-A33F-05	BRCA_luminal	43	Cancer	0.454798	5381.8	0.127422	0.43243	122.578	0.215934	0.349025	0.891		0.8782	0.7	0.8625
TCGA-A2-A4S3-01A-21D-A268-05	BRCA_luminal	59	Cancer	0.367567	2433.46	0.0827933	0.31844	97.8222	0.215647	0.423917	0.8042		0.7096	0.7	0.6935
TCGA-B6-A2IU-01A-32D-A18O-05	BRCA_luminal	62	Cancer	0.544688	6883.23	0.166562	0.476478	114.631	0.314406	0.412116	0.9108	0.69	0.874	0.7	0.852
TCGA-E9-A1R6-01A-11D-A14H-05	BRCA_luminal	63	Cancer	0.713848	13059	0.300907	0.5708	142.431	0.182903	0.319062	0.8657	0.66	0.9017	0.85	0.832
TCGA-C8-A27A-01A-11D-A16A-05	BRCA_luminal	48	Cancer	0.801806	13141.2	0.274929	0.575463	110.78	0.277116	0.41138	0.9234	0.76	0.8906	0.7	0.8949
TCGA-EW-A2FW-01A-11D-A17F-05	BRCA_luminal	52	Cancer	0.578345	5496.66	0.127275	0.38633	132.1	0.233627	0.401531	0.8784	0.87	0.9536	0.95	0.9128
TCGA-E2-A14U-01A-11D-A22B-05	BRCA_luminal	74	Cancer	0.312867	3164.29	0.0854576	0.31856	103.218	0.070407	0.246145	0.9211		0.844	0.6	0.8515
TCGA-E9-A247-01A-11D-A16A-05	BRCA_luminal	59	Cancer	0.79721	16861.2	0.39737	0.648361	134.537	0.192429	0.377562	0.9177	0.72	0.9832	0.9	0.8721
TCGA-BH-A0DS-01A-11D-A10P-05	BRCA_luminal	71	Cancer	0.795944	19352.9	0.4052	0.63117	140.44	0.164136	0.324954	0.7161	0.63	0.9049	0.775	0.7423
TCGA-BH-A0DG-01A-21D-A12R-05	BRCA_luminal	30	Cancer	0.522535	10081.5	0.213335	0.475078	122.401	0.0831386	0.234559	0.6358	0.42	0.7804	0.775	0.5386
TCGA-D8-A1X7-01A-11D-A14N-05	BRCA_luminal	40	Cancer	0.536744	6967.62	0.173131	0.397325	114.869	0.274318	0.379198	0.8254	0.77	0.7838	0.65	0.8307
TCGA-A2-A1FV-01A-11D-A13K-05	BRCA_luminal	74	Cancer	0.833055	17985.4	0.425087	0.637566	148.222	0.322711	0.356554	0.8957	0.9	0.9543	0.9	0.9309
TCGA-AC-A3TM-01A-11D-A22B-05	BRCA_luminal	50	Cancer	0.608114	8788.7	0.199791	0.546971	121.824	0.125434	0.290642	0.798	0.69	0.8405	0.85	0.8322
TCGA-E2-A107-01A-11D-A10N-05	BRCA_luminal	54	Cancer	0.729146	10469.7	0.220301	0.543325	132.112	0.191044	0.333355	0.9134	0.45	0.8766	0.85	0.7959
TCGA-EW-A1P6-01A-11D-A145-05	BRCA_luminal	64	Cancer	0.542152	6381.05	0.144574	0.406923	110.25	0.319757	0.503759	0.8298	0.75	0.8507	0.85	0.8253
TCGA-BH-A201-01A-11D-A14N-05	BRCA_luminal	64	Cancer	0.513388	9203.08	0.191116	0.460112	117.931	0.125379	0.298183	0.7996	0.55	0.8637	0.65	0.7648
TCGA-E9-A1NI-01A-11D-A14H-05	BRCA_luminal	51	Cancer	0.654772	9403.65	0.233545	0.526962	136.016	0.265887	0.396372	0.8002	0.66	0.9206	0.8	0.7639
TCGA-EW-A1OZ-01A-11D-A145-05	BRCA_luminal	56	Cancer	0.736849	17728.4	0.429399	0.632868	134.524	0.177793	0.267029	0.7632	0.63	0.8908	0.75	0.8205
TCGA-PE-A5DD-01A-12D-A27Y-05	BRCA_luminal	64	Cancer	0.789325	18437.2	0.438759	0.684377	138.926	0.188791	0.365525	0.7428			0.8	0.6816
TCGA-BH-A42V-01A-11D-A244-05	BRCA_luminal	41	Cancer	0.51622	8961.36	0.194946	0.462134	121.989	0.118761	0.295726	0.7343		0.7957	0.85	0.6497
TCGA-BH-A0HB-01A-11D-A10P-05	BRCA_luminal	55	Cancer	0.617245	9540.46	0.198477	0.547828	117.821	0.188746	0.396012	0.7387	0.65	0.817	0.7	0.7964
TCGA-A2-A0CO-01A-13D-A22B-05	BRCA_luminal	85	Cancer	0.579346	9870.32	0.230956	0.507957	111.773	0.224189	0.41844	0.5726	0.63	0.7523	0.55	0.7228
TCGA-OL-A5RV-01A-12D-A28C-05	BRCA_luminal	43	Cancer	0.418754	6181.98	0.137146	0.421528	109.841	0.103731	0.256161	0.875		0.8068	0.7	0.8408
TCGA-GM-A2DN-01A-11D-A17Z-05	BRCA_luminal	58	Cancer	0.475909	9963.44	0.218699	0.447805	125.219	0.121983	0.347595	0.6419	0.34	0.6156	0.7	0.5048
TCGA-A7-A26J-01A-11D-A16A-05	BRCA_luminal	49	Cancer	0.672948	8991.41	0.220095	0.525626	132.173	0.2463	0.354123	0.772	0.7		0.8	0.7009
TCGA-E2-A1L9-01A-11D-A13K-05	BRCA_luminal	40	Cancer	0.505673	4545.54	0.118006	0.403242	103.242	0.148866	0.295439	0.6585	0.59	0.8376	0.8	0.7831
TCGA-D8-A1XR-01A-11D-A14N-05	BRCA_luminal	56	Cancer	0.469156	2993.98	0.08055	0.358962	125.845	0.34268	0.516552	0.8641	0.77	0.8197	0.7	0.8245
TCGA-E9-A1N4-01A-11D-A14N-05	BRCA_luminal	41	Cancer	0.45198	3774.53	0.100031	0.336736	123.832	0.312908	0.468763	0.6402	0.64	0.7016	0.8	0.6483
TCGA-BH-A0BA-01A-11D-A10P-05	BRCA_luminal	51	Cancer	0.679868	9149.2	0.192109	0.519076	136.611	0.272179	0.43194	0.7944	0.48	0.8945	0.87	0.7278
TCGA-EW-A1PD-01A-11D-A145-05	BRCA_luminal	61	Cancer	0.591548	12457.2	0.269461	0.515987	129.6	0.111492	0.325075	0.7962	0.6	0.8712	0.7	0.7402
TCGA-LL-A9Q3-01A-11D-A41Q-05	BRCA_luminal	69	Cancer	0.661074	11755.2	0.23996	0.53302	130.173	0.19061	0.275284	0.7823			0.8	0.7531
TCGA-E9-A1R2-01A-11D-A14H-05	BRCA_luminal	51	Cancer	0.581677	7468.07	0.15956	0.469984	122.035	0.0944782	0.245935	0.8144	0.67	0.8262	0.8	0.8144
TCGA-AQ-A54O-01A-11D-A268-05	BRCA_luminal	51	Cancer	0.505391	6045.28	0.137628	0.393179	119.738	0.161871	0.283424	0.8438		0.8937	0.8	0.7984
TCGA-E9-A1NF-01A-11D-A14H-05	BRCA_luminal	60	Cancer	0.617314	12300.2	0.277178	0.509017	109.926	0.189267	0.409076	0.6161	0.47	0.8313	0.8	0.5489
TCGA-A2-A1FW-01A-11D-A13K-05	BRCA_luminal	62	Cancer	0.828991	15468	0.32036	0.695426	149.188	0.312154	0.491118	0.8566	0.85	0.9831	0.75	0.8923
TCGA-AO-A0JA-01A-11D-A10P-05	BRCA_luminal	36	Cancer	0.686702	9874.6	0.227301	0.544736	114.904	0.133323	0.256281	0.6844	0.66	0.8676	0.8	0.79
TCGA-LL-A5YN-01A-11D-A28C-05	BRCA_luminal	46	Cancer	0.480886	9160.53	0.198473	0.432066	120.583	0.166266	0.346818	0.6156		0.5263	0.7	0.4885
TCGA-D8-A1JH-01A-11D-A13K-05	BRCA_luminal	56	Cancer	0.446026	6262.74	0.15023	0.371694	111.787	0.141797	0.304528	0.6706		0.7699	0.6	0.6126
TCGA-AC-A5XS-01A-11D-A29O-05	BRCA_luminal	74	Cancer	0.518161	7346.25	0.181282	0.469744	99.1391	0.225631	0.388171	0.6591		0.6777	0.8	0.656
TCGA-AO-A0JC-01A-11D-A10P-05	BRCA_luminal	64	Cancer	0.283865	3453.03	0.0926886	0.253513	102.985	0.0903219	0.274248	0.3548		0.2316	0.9	0.1344
TCGA-C8-A26Z-01A-11D-A16G-05	BRCA_luminal	59	Cancer	0.633934	4736.74	0.121366	0.352647	117.105	0.317792	0.430205	0.8867	0.76	0.946	0.8	0.8701
TCGA-AC-A2FM-01A-11D-A19Z-05	BRCA_luminal	87	Cancer	0.796716	20028.9	0.415483	0.680088	131.943	0.0963545	0.247398	0.9082	0.79	0.9846	0.8	0.8989
TCGA-BH-A1FH-01A-12D-A13K-05	BRCA_luminal	47	Cancer	0.336144	3310.06	0.101022	0.295217	95.8727	0.0784887	0.247875	0.68	0.18	0.8005	0.6	0.6881
TCGA-E9-A3X8-01A-31D-A230-05	BRCA_luminal	48	Cancer	0.488848	8457.32	0.184025	0.442146	111.608	0.106982	0.306389	0.6356		0.7512	0.8	0.6126
TCGA-D8-A27V-01A-12D-A17F-05	BRCA_luminal	62	Cancer	0.546903	7458.01	0.183285	0.442909	128.06	0.2598	0.40516	0.8041	0.64	0.8244	0.7	0.7582
TCGA-BH-A0B5-01A-11D-A12R-05	BRCA_luminal	40	Cancer	0.661322	11238.9	0.253516	0.589462	108.55	0.238163	0.369742	0.7539	0.5	0.8944	0.575	0.6566
TCGA-D8-A1Y2-01A-11D-A161-05	BRCA_luminal	71	Cancer	0.416192	4741.64	0.108066	0.316214	105.341	0.138664	0.38136	0.4504	0.42	0.6069	0.7	0.4127
TCGA-OL-A5D8-01A-11D-A27Y-05	BRCA_luminal	40	Cancer	0.800174	20004.5	0.456894	0.696866	147.041	0.134385	0.250983	0.8353			0.9	0.7891
TCGA-A7-A13H-01A-11D-A22B-05	BRCA_luminal	61	Cancer	0.468419	7893.21	0.172314	0.420349	121.221	0.0997558	0.283995	0.6596	0.44	0.7678	0.625	0.671
TCGA-E9-A3HO-01A-11D-A212-05	BRCA_luminal	49	Cancer	0.755896	12134	0.24202	0.59502	139.115	0.167417	0.372422	0.8256	0.75	0.9009	0.9	0.8239
TCGA-AR-A24V-01A-21D-A16A-05	BRCA_luminal	52	Cancer	0.620324	10108.2	0.222892	0.485199	137.08	0.376969	0.521708	0.6372	0.52	0.851	0.85	0.746
TCGA-D8-A3Z5-01A-41D-A244-05	BRCA_luminal	54	Cancer	0.506803	7783.7	0.170434	0.456712	124.86	0.137609	0.28375	0.8796		0.9029	0.75	0.847
TCGA-E9-A1QZ-01A-21D-A16A-05	BRCA_luminal	61	Cancer	0.375485	5164.3	0.132229	0.340171	116.483	0.167975	0.379146	0.6351	0.3	0.5985	0.8	0.539
TCGA-EW-A1P3-01A-11D-A145-05	BRCA_luminal	48	Cancer	0.545675	8119.2	0.193337	0.476745	127.698	0.194342	0.315241	0.8158	0.68	0.8166	0.8	0.784
TCGA-D8-A4Z1-01A-21D-A268-05	BRCA_luminal	68	Cancer	0.343479	6057.08	0.149958	0.337053	106.157	0.0931746	0.246956	0.7735		0.8283	0.7	0.7466
TCGA-E9-A5FK-01A-11D-A27Y-05	BRCA_luminal	60	Cancer	0.521415	10103.6	0.228446	0.482628	108.839	0.104292	0.322484	0.5394			0.7	0.2308
TCGA-D8-A1XM-01A-21D-A14N-05	BRCA_luminal	57	Cancer	0.511881	7395.84	0.165244	0.439199	123.217	0.117803	0.28827	0.6452	0.52	0.6957	0.65	0.6665
TCGA-AR-A2LJ-01A-12D-A19Z-05	BRCA_luminal	40	Cancer	0.444009	5464.71	0.133011	0.384265	98.39	0.0647874	0.243321	0.5797	0.4	0.7678	0.7	0.652
TCGA-BH-A0H7-01A-13D-A10P-05	BRCA_luminal	65	Cancer	0.741937	8833.71	0.202345	0.530364	135.758	0.36928	0.486357	0.7939	0.63	0.9561	0.725	0.7534
TCGA-AC-A2FG-01A-11D-A17F-05	BRCA_luminal	79	Cancer	0.537513	6574.73	0.160107	0.429151	104.039	0.19444	0.345828	0.836	0.56	0.8514	0.6	0.7895
TCGA-BH-A0DK-01A-21D-A10P-05	BRCA_luminal	49	Cancer	0.675397	17988.8	0.404264	0.576687	132.057	0.120622	0.290566	0.5384	0.53	0.7316	0.7	0.6837
TCGA-AC-A2FB-01A-11D-A17F-05	BRCA_luminal	65	Cancer	0.421311	7838.09	0.168713	0.391085	107.946	0.0927313	0.308816	0.5372	0.23	0.5493	0.7	0.4436
TCGA-AC-A62Y-01A-11D-A29O-05	BRCA_luminal	79	Cancer	0.494294	8739.53	0.173548	0.476796	101.175	0.145074	0.353491	0.709		0.7981	0.7	0.7913
TCGA-AR-A24S-01A-11D-A16A-05	BRCA_luminal	61	Cancer	0.478349	5515.41	0.122188	0.370856	99.8572	0.348206	0.518456	0.5584	0.46	0.6285	0.85	0.5987
TCGA-BH-A0GY-01A-11D-A10P-05	BRCA_luminal	67	Cancer	0.621537	7937.7	0.168931	0.474624	106.914	0.253265	0.430789	0.7835	0.49	0.8167	0.7	0.7539
TCGA-E9-A1RB-01A-11D-A161-05	BRCA_luminal	40	Cancer	0.424606	4124.08	0.109227	0.384269	106.985	0.20054	0.351348	0.8664	0.56	0.8281	0.9	0.8309
TCGA-AO-A1KT-01A-11D-A13K-05	BRCA_luminal	78	Cancer	0.710318	16018.1	0.352846	0.590145	146.481	0.369715	0.536389	0.7733	0.59	0.8146	0.85	0.7696
TCGA-AO-A1KP-01A-11D-A13K-05	BRCA_luminal	77	Cancer	0.839075	11942.5	0.263179	0.64688	141.052	0.24805	0.402728	0.935	0.89	1	0.8	0.9611
TCGA-A2-A4S0-01A-21D-A268-05	BRCA_luminal	77	Cancer	0.425456	3010.18	0.0856434	0.342372	97.3429	0.136196	0.309293	0.9187		0.8709	0.8	0.883
TCGA-D8-A1XL-01A-11D-A14N-05	BRCA_luminal	34	Cancer	0.524934	5979.35	0.136982	0.464842	98.2839	0.136758	0.301487	0.7267	0.56	0.7517	0.75	0.7184
TCGA-AO-A0JM-01A-21D-A10P-05	BRCA_luminal	40	Cancer	0.751943	14923.1	0.379713	0.619963	144.658	0.213233	0.401337	0.7734	0.55	0.8888	0.85	0.7582
TCGA-AR-A24O-01A-11D-A16A-05	BRCA_luminal	43	Cancer	0.395477	4325.42	0.109687	0.358313	110.565	0.138379	0.321009	0.6059	0.4	0.7111	0.8	0.6188
TCGA-B6-A0RG-01A-11D-A10P-05	BRCA_luminal	26	Cancer	0.607208	3978.19	0.111376	0.359365	133.829	0.444167	0.533674	0.8897	0.81	0.9209	0.85	0.8958
TCGA-D8-A1JD-01A-11D-A13K-05	BRCA_luminal	41	Cancer	0.577163	6992.88	0.157158	0.431053	117.256	0.217321	0.362621	0.6981	0.5	0.8148	0.7	0.6188
TCGA-C8-A8HQ-01A-11D-A36K-05	BRCA_luminal	53	Cancer	0.677911	16129.8	0.371332	0.574953	130.056	0.179617	0.353379	0.6875		0.7446	0.6	0.6573
TCGA-E2-A10B-01A-11D-A10N-05	BRCA_luminal	67	Cancer	0.657779	8569.55	0.226782	0.573976	135.023	0.168163	0.280543	0.7892	0.74	0.8883	0.7	0.8646
TCGA-OL-A66K-01A-11D-A29O-05	BRCA_luminal	72	Cancer	0.750964	13541.2	0.284119	0.617028	137.177	0.198433	0.317351	0.818		0.9201	0.7	0.836
TCGA-A8-A08O-01A-21D-A10P-05	BRCA_luminal	45	Cancer	0.62842	4409.21	0.103435	0.438611	98.5109	0.193943	0.361086	0.8635	0.6	0.9382	0.8	0.8251
TCGA-D8-A1XY-01A-11D-A14N-05	BRCA_luminal	74	Cancer	0.43724	2591.63	0.0790409	0.284549	115.398	0.30732	0.426728	0.7604	0.45	0.7263	0.6	0.6991
TCGA-EW-A1OY-01A-11D-A145-05	BRCA_luminal	63	Cancer	0.562508	6010.84	0.126653	0.491687	104.947	0.408184	0.555641	0.8712	0.81	0.8972	0.8	0.8973
TCGA-AC-A3QQ-01A-11D-A22B-05	BRCA_luminal	54	Cancer	0.572074	8225.68	0.20393	0.496797	136.135	0.29519	0.445647	0.7777	0.72	0.8461	0.85	0.7771
TCGA-AR-A1AN-01A-11D-A12R-05	BRCA_luminal	46	Cancer	0.465213	3593.14	0.101246	0.410439	100.969	0.167803	0.372942	0.7189	0.55	0.8451	0.8	0.6708
TCGA-AN-A0XO-01A-11D-A10A-05	BRCA_luminal	59	Cancer	0.669167	10724.6	0.225838	0.597305	125.962	0.180884	0.356217	0.8938	0.67	0.952	0.825	0.8323
TCGA-AR-A2LO-01A-31D-A18O-05	BRCA_luminal	46	Cancer	0.44414	7482.69	0.17603	0.393648	115.139	0.0874751	0.269319	0.6756	0.33	0.7217	0.85	0.6388
TCGA-A2-A1G4-01A-11D-A13K-05	BRCA_luminal	71	Cancer	0.739204	14498.7	0.336179	0.633921	137.611	0.103675	0.306401	0.8868	0.78	0.8812	0.9	0.8879
TCGA-D8-A1XZ-01A-11D-A14N-05	BRCA_luminal	81	Cancer	0.669128	11369.9	0.251589	0.557601	114.195	0.393112	0.645584	0.7615	0.67	0.7514	0.85	0.7704
TCGA-D8-A1JT-01A-31D-A13K-05	BRCA_luminal	70	Cancer	0.771642	10933.7	0.214691	0.566999	133.581	0.351819	0.427218	0.8822	0.89	0.9058	0.8	0.9024
TCGA-EW-A6SC-01A-12D-A32T-05	BRCA_luminal	60	Cancer	0.529568	3355.42	0.101245	0.348435	100.481	0.299668	0.420923	0.7187		0.8458	0.9	0.6285
TCGA-A7-A5ZX-01A-12D-A29O-05	BRCA_luminal	48	Cancer	0.505706	7966.96	0.183734	0.474088	117.845	0.0959838	0.190155	0.809		0.9629	0.7	0.836
TCGA-E2-A2P6-01A-11D-A19Z-05	BRCA_luminal	77	Cancer	0.807271	15292.7	0.342045	0.674108	136.847	0.206834	0.371378	0.8344	0.86	0.9569	0.88	0.882
TCGA-GM-A2DK-01A-21D-A17Z-05	BRCA_luminal	58	Cancer	0.478678	5826.23	0.139261	0.409115	112.262	0.139938	0.326698	0.7214	0.47	0.7474	0.7	0.6851
TCGA-AC-A2QI-01A-12D-A19Z-05	BRCA_luminal	76	Cancer	0.555267	6297.36	0.152329	0.372643	113.291	0.31905	0.454491	0.694	0.58	0.7209	0.6	0.7098
TCGA-D8-A27P-01A-11D-A16G-05	BRCA_luminal	64	Cancer	0.387226	4039.34	0.0930369	0.329782	97.0605	0.13582	0.309919	0.8714	0.64	0.8651	0.6	0.8136
TCGA-D8-A1XF-01A-11D-A14H-05	BRCA_luminal	45	Cancer	0.861339	27508.1	0.611986	0.770167	127.988	0.0606517	0.158601	0.9402	0.78	0.9764	0.85	0.9159
TCGA-MS-A51U-01A-31D-A268-05	BRCA_luminal	44	Cancer	0.424103	5328.63	0.137504	0.382618	114.599	0.12561	0.282646	0.7457		0.785	0.65	0.7466
TCGA-A2-A0YG-01A-21D-A10A-05	BRCA_luminal	63	Cancer	0.766977	13676.6	0.301591	0.604132	127.514	0.159318	0.258031	0.8808	0.6	0.9033	0.8	0.7976
TCGA-AR-A24W-01A-11D-A16A-05	BRCA_luminal	55	Cancer	0.307902	2531.81	0.0773575	0.308821	101.86	0.116704	0.281759	0.8235	0.31	0.8978	0.6	0.6138
TCGA-B6-A0RV-01A-11D-A10P-05	BRCA_luminal	42	Cancer	0.525676	6884.59	0.173301	0.490122	104.894	0.0936406	0.268896	0.8063	0.46	0.819	0.725	0.7694
TCGA-D8-A1JE-01A-11D-A13K-05	BRCA_luminal	62	Cancer	0.550746	8289.3	0.187269	0.462654	104.418	0.201834	0.36827	0.659	0.53	0.7818	0.9	0.6837
TCGA-D8-A1XC-01A-11D-A14H-05	BRCA_luminal	85	Cancer	0.670018	11474.7	0.237903	0.576453	134.898	0.239534	0.414581	0.9428	0.89	0.9293	0.98	0.9423
TCGA-AR-A1AV-01A-21D-A12R-05	BRCA_luminal	68	Cancer	0.855414	18818	0.426854	0.74391	153.061	0.158374	0.325618	0.8391	0.65	0.9588	0.6	0.7856
TCGA-WT-AB41-01A-11D-A41Q-05	BRCA_luminal	55	Cancer	0.521372	11003.9	0.242391	0.481586	122.507	0.151491	0.304415	0.6302			0.75	0.6051
TCGA-AN-A0XL-01A-11D-A10N-05	BRCA_luminal	61	Cancer	0.569048	5266.53	0.138933	0.347582	124.91	0.292676	0.41107	0.7631	0.52	0.7935	0.79	0.6888
TCGA-A2-A0YT-01A-11D-A10A-05	BRCA_luminal	56	Cancer	0.755132	11440.8	0.247841	0.591273	143.682	0.38397	0.53083	0.8753	0.59	0.8585	0.85	0.7817
TCGA-BH-A8FY-01A-11D-A36K-05	BRCA_luminal	87	Cancer	0.84454	15992	0.401428	0.702296	154.133	0.298562	0.37182	0.9068		0.8977	0.9	0.8839
TCGA-AR-A24R-01A-11D-A16A-05	BRCA_luminal	45	Cancer	0.673606	14406.7	0.336846	0.601988	135.955	0.186114	0.298511	0.797	0.56	0.8296	0.9	0.7847
TCGA-BH-A0B8-01A-21D-A10P-05	BRCA_luminal	64	Cancer	0.838449	15694.9	0.384827	0.679056	152.76	0.347392	0.48415	0.8571	0.87	0.9827	0.85	0.9342
TCGA-D8-A1X9-01A-12D-A161-05	BRCA_luminal	66	Cancer	0.695251	16470.5	0.367063	0.587281	147.079	0.295588	0.438116	0.7204	0.75	0.8569	0.9	0.8703
TCGA-BH-A0BT-01A-11D-A12R-05	BRCA_luminal	56	Cancer	0.783405	8951.19	0.183217	0.494745	110.798	0.343868	0.488437	0.8096	0.67	0.9054	0.75	0.7751
TCGA-AO-A0JI-01A-21D-A10P-05	BRCA_luminal	56	Cancer	0.858005	25182.1	0.542013	0.734256	138.406	0.111515	0.181963	0.9152	0.8	0.9744	0.775	0.9084
TCGA-S3-AA17-01A-11D-A41Q-05	BRCA_luminal	64	Cancer	0.620849	16257.9	0.357973	0.561374	126.719	0.109637	0.300473	0.5859			0.8	0.5751
TCGA-BH-A1FM-01A-11D-A13K-05	BRCA_luminal	44	Cancer	0.654218	11259.8	0.267002	0.542305	135.453	0.303753	0.397594	0.8068	0.7	0.8995	0.9	0.7874
TCGA-OK-A5Q2-01A-11D-A27Y-05	BRCA_luminal	59	Cancer	0.535954	11386.7	0.249997	0.504407	119.03	0.0921917	0.29273	0.6908			0.6	0.7133
TCGA-BH-A0BM-01A-11D-A10P-05	BRCA_luminal	54	Cancer	0.538857	4686.43	0.122527	0.442762	102.202	0.150009	0.307263	0.796	0.61	0.9189	0.84	0.7886
TCGA-A8-A075-01A-11D-A10P-05	BRCA_luminal	42	Cancer	0.449275	4812.32	0.107327	0.345731	103.871	0.224787	0.469338	0.7362	0.52	0.7025	0.85	0.6706
TCGA-A2-A4S2-01A-12D-A268-05	BRCA_luminal	62	Cancer	0.577838	10385.8	0.239637	0.489375	131.629	0.148118	0.30936	0.6979		0.7492	0.6	0.7401
TCGA-E9-A2JS-01A-11D-A17Z-05	BRCA_luminal	72	Cancer	0.734964	20024.4	0.443589	0.61954	122.954	0.142614	0.33441	0.8579	0.64	0.8933	0.8	0.8267
TCGA-B6-A0WV-01A-11D-A10A-05	BRCA_luminal	67	Cancer	0.75483	10312.3	0.230135	0.607863	142.917	0.347026	0.420887	0.9587	0.64	0.9708	0.775	0.8728
TCGA-A1-A0SE-01A-11D-A10P-05	BRCA_luminal	56	Cancer	0.506424	5113.85	0.128111	0.429491	117.708	0.153615	0.273437	0.8318	0.3	0.9158	0.75	0.7979
TCGA-E9-A249-01A-11D-A16A-05	BRCA_luminal	45	Cancer	0.639085	9681.1	0.202576	0.482381	128.219	0.155926	0.331311	0.8765	0.66	0.8833	0.9	0.8617
TCGA-B6-A401-01A-11D-A23D-05	BRCA_luminal	47	Cancer	0.525687	7872.81	0.183095	0.450349	114.063	0.185176	0.379363	0.7525		0.6797	0.85	0.6744
TCGA-BH-A0W3-01A-11D-A10A-05	BRCA_luminal	58	Cancer	0.769126	9426.91	0.226347	0.595819	124.42	0.223531	0.400672	0.8914	0.78	0.9436	0.825	0.8827
TCGA-GM-A3NY-01A-11D-A21R-05	BRCA_luminal	72	Cancer	0.69983	12576.7	0.261674	0.598544	128.264	0.122788	0.262663	0.8439	0.75	0.9202	0.85	0.8363
TCGA-A1-A0SH-01A-11D-A10P-05	BRCA_luminal	39	Cancer	0.491912	4363.05	0.116763	0.384269	100.517	0.120654	0.27586	0.6907	0.44	0.853	0.8	0.6574
TCGA-AR-A24H-01A-11D-A16A-05	BRCA_luminal	65	Cancer	0.827406	16333.5	0.337518	0.637614	149.944	0.332348	0.495871	0.8374	0.75	0.8758	0.9	0.855
TCGA-BH-A1FE-01A-11D-A13K-05	BRCA_luminal	31	Cancer	0.47732	8697.19	0.190171	0.425647	112.328	0.122948	0.313715	0.6234	0.24	0.6222	0.7
TCGA-LD-A7W5-01A-22D-A357-05	BRCA_luminal	52	Cancer	0.574794	13236.9	0.294759	0.475584	124.972	0.135774	0.320332	0.6297		0.6308	0.6	0.6009
TCGA-BH-A0C0-01A-21D-A10P-05	BRCA_luminal	62	Cancer	0.570127	12909.6	0.278551	0.472777	122.237	0.120466	0.353354	0.6223	0.27	0.5586	0.85	0.5068
TCGA-EW-A1P5-01A-11D-A145-05	BRCA_luminal	77	Cancer	0.627197	9464.92	0.200035	0.507418	137.405	0.150611	0.321442	0.7781	0.65	0.855	0.85	0.7629
TCGA-GM-A3XG-01A-31D-A244-05	BRCA_luminal	46	Cancer	0.233166	1754.8	0.0632758	0.300818	91.5971	0.0519185	0.199914	0.9033		0.8812	0.6	0.8792
TCGA-LQ-A4E4-01A-11D-A268-05	BRCA_luminal	73	Cancer	0.771893	12355.9	0.284226	0.614875	139.235	0.241838	0.396486	0.9074		0.9677	0.85	0.8847
TCGA-A2-A0YF-01A-21D-A10A-05	BRCA_luminal	67	Cancer	0.69152	12148.7	0.247582	0.566783	129.701	0.332005	0.482418	0.8024	0.8	0.9364	0.835	0.8519
TCGA-BH-A0AU-01A-11D-A12R-05	BRCA_luminal	45	Cancer	0.553226	4830.98	0.10562	0.421037	94.8815	0.11442	0.279828	0.765	0.46	0.8525	0.775	0.652
TCGA-3C-AALK-01A-11D-A41Q-05	BRCA_luminal	52	Cancer	0.615842	14028.5	0.30881	0.533313	127.008	0.145549	0.236244	0.7506			0.6	0.6869
TCGA-AR-A1AX-01A-11D-A12R-05	BRCA_luminal	64	Cancer	0.370041	4949.47	0.119845	0.358098	100.439	0.0816745	0.300646	0.5628	0.17	0.5348	0.7	0.3705
TCGA-HN-A2OB-01A-21D-A27Y-05	BRCA_luminal	45	Cancer	0.492384	7760.46	0.171679	0.438038	113.72	0.112215	0.27083	0.7302			0.65	0.4274
TCGA-E2-A1IK-01A-11D-A145-05	BRCA_luminal	71	Cancer	0.253107	3402.01	0.0777099	0.257546	98.1077	0.170642	0.364591	0.8115		0.6671	0.8	0.7546
TCGA-AC-A3HN-01A-11D-A212-05	BRCA_luminal	87	Cancer	0.44032	6411.48	0.146547	0.423019	100.954	0.0912344	0.256294	0.6137	0.46	0.7586	0.8	0.6751
TCGA-A2-A0T5-01A-21D-A10P-05	BRCA_luminal	39	Cancer	0.604084	8106.42	0.178231	0.458739	129.034	0.119055	0.244166	0.8378	0.61	0.881	0.725	0.7658
TCGA-AR-A2LK-01A-11D-A17Z-05	BRCA_luminal	62	Cancer	0.792149	17826.9	0.3633	0.662887	130.97	0.22319	0.465871	0.7947	0.78	0.9217	0.75	0.8692
TCGA-AO-A12G-01A-11D-A10N-05	BRCA_luminal	75	Cancer	0.718772	12847.9	0.292882	0.61919	127.882	0.155889	0.274168	0.7832	0.68	0.9098	0.8	0.8106
TCGA-E9-A22H-01A-11D-A161-05	BRCA_luminal	42	Cancer	0.519197	6996.53	0.152867	0.433194	108.225	0.207179	0.342136	0.8431	0.74	0.7962	0.7	0.7964
TCGA-AC-A3YJ-01A-11D-A230-05	BRCA_luminal	66	Cancer	0.58214	7532.3	0.179477	0.522345	109.093	0.182616	0.335867	0.839		0.861	0.8	0.7918
TCGA-OL-A5RX-01A-11D-A28C-05	BRCA_luminal	51	Cancer	0.510873	7522.63	0.181269	0.466439	101.685	0.0948107	0.242919	0.8148		0.8018	0.65	0.8019
TCGA-EW-A1J5-01A-11D-A13K-05	BRCA_luminal	59	Cancer	0.617883	10657.7	0.258528	0.542705	126.021	0.237947	0.357882	0.6812	0.99	0.7669	0.9	0.7538
TCGA-C8-A1HM-01A-12D-A138-05	BRCA_luminal	74	Cancer	0.703938	8963.14	0.20346	0.533801	112.056	0.324989	0.522432	0.6826	0.42	0.7337	0.85	0.5704
TCGA-A7-A5ZW-01A-12D-A29O-05	BRCA_luminal	47	Cancer	0.42437	3088.58	0.0917972	0.38112	96.4225	0.0768698	0.220538	0.6952		0.8301	0.7	0.7466
TCGA-B6-A0RM-01A-11D-A10P-05	BRCA_luminal	57	Cancer	0.569711	8168.88	0.184413	0.455174	140.617	0.171373	0.393323	0.9205	0.84	0.9848	0.85	0.931
TCGA-EW-A1OX-01A-11D-A145-05	BRCA_luminal	43	Cancer	0.87663	15851.3	0.396949	0.744299	151.929	0.213464	0.263024	0.9856	0.94	1	0.85	0.9955
TCGA-BH-AB28-01A-31D-A41Q-05	BRCA_luminal	53	Cancer	0.643398	13574.2	0.310734	0.55587	131.142	0.179833	0.293882	0.7517			0.75	0.643
TCGA-E9-A228-01A-31D-A161-05	BRCA_luminal	58	Cancer	0.701955	17894.6	0.389351	0.540586	122.125	0.127433	0.210233	0.8589	0.74	0.9151	0.85	0.8949
TCGA-E9-A1RE-01A-11D-A161-05	BRCA_luminal	74	Cancer	0.80551	18668.3	0.401229	0.652048	154.187	0.304795	0.481408	0.9038	0.79	0.9127	0.9	0.8959
TCGA-E9-A1N3-01A-12D-A161-05	BRCA_luminal	70	Cancer	0.361424	2915.69	0.0795978	0.307666	102.253	0.201416	0.357544	0.9374	0.77	0.9735	0.9	0.9093
TCGA-E2-A15I-01A-21D-A138-05	BRCA_luminal	44	Cancer	0.372385	4560.64	0.109551	0.370635	106.366	0.283209	0.458833	0.7689	0.62	0.768	0.8	0.7565
TCGA-AQ-A04L-01B-21D-A10N-05	BRCA_luminal	48	Cancer	0.835833	18709.5	0.392884	0.674438	146.514	0.326145	0.547072	0.8186	0.76	0.9732	0.85	0.8262
TCGA-E2-A1IF-01A-11D-A145-05	BRCA_luminal	74	Cancer	0.381283	3089.03	0.0834662	0.328746	96.4183	0.151895	0.332485	0.7639	0.35	0.7799	0.8	0.733
TCGA-D8-A27K-01A-11D-A16G-05	BRCA_luminal	47	Cancer	0.535869	8878.94	0.21659	0.497524	108.149	0.0909786	0.254955	0.7494	0.58	0.7498	0.85	0.7268
TCGA-BH-A0W4-01A-11D-A10A-05	BRCA_luminal	46	Cancer	0.497947	5238.57	0.122769	0.440864	128.534	0.163734	0.320553	0.8451	0.55	0.9261	0.75	0.8002
TCGA-E2-A1BC-01A-11D-A12R-05	BRCA_luminal	63	Cancer	0.573349	8712.3	0.197944	0.511083	103.617	0.138278	0.312066	0.8083	0.56	0.8676	0.85	0.7707
TCGA-A7-A56D-01A-11D-A27Y-05	BRCA_luminal	84	Cancer	0.615703	9958.15	0.228244	0.527538	130.604	0.255903	0.422616	0.7021			0.65	0.587
TCGA-B6-A1KN-01A-11D-A13K-05	BRCA_luminal	57	Cancer	0.699972	14166.9	0.333789	0.559333	137.206	0.255629	0.46442	0.8327	0.56	0.8332	0.65	0.7427
TCGA-OL-A5RU-01A-11D-A28C-05	BRCA_luminal	63	Cancer	0.446612	7737.61	0.171773	0.423965	109.886	0.124389	0.334392	0.702		0.6242	0.65	0.6058
TCGA-BH-A1ET-01A-11D-A138-05	BRCA_luminal	55	Cancer	0.608741	4775.18	0.131302	0.48645	107.863	0.236879	0.431101	0.7849	0.68	0.876	0.85	0.8442
TCGA-GM-A5PV-01A-11D-A28C-05	BRCA_luminal	63	Cancer	0.462202	4431.99	0.112164	0.382779	105.444	0.20947	0.366608	0.8875		0.8302	0.65	0.8352
TCGA-AC-A3EH-01A-22D-A22B-05	BRCA_luminal	79	Cancer	0.774517	15091.5	0.353872	0.651093	146.086	0.20945	0.374924	0.8303	0.7	0.9038	0.85	0.8033
TCGA-AR-A0TW-01A-11D-A10P-05	BRCA_luminal	50	Cancer	0.661055	13307.3	0.295636	0.551221	135.623	0.250688	0.43948	0.7626	0.91	0.7227	0.9	0.7947
TCGA-D8-A1Y0-01A-11D-A14N-05	BRCA_luminal	65	Cancer	0.534077	7910.46	0.181831	0.437868	103.059	0.186206	0.349191	0.6593	0.56	0.754	0.85	0.7198
TCGA-A1-A0SG-01A-11D-A145-05	BRCA_luminal	61	Cancer	0.474677	4182.32	0.108874	0.353449	111.886	0.321394	0.493495	0.7719	0.65	0.7446	0.825	0.7569
TCGA-E2-A1B4-01A-11D-A12R-05	BRCA_luminal	74	Cancer	0.619235	6426.87	0.159799	0.522273	137.256	0.247093	0.404527	0.8883	0.79	0.9503	0.65	0.8854
TCGA-XX-A899-01A-11D-A36K-05	BRCA_luminal	46	Cancer	0.53061	10628	0.23133	0.471734	122.014	0.101047	0.283108	0.5618		0.6359	0.65	0.6069
TCGA-AC-A3W7-01A-11D-A22B-05	BRCA_luminal	66	Cancer	0.591189	8910.92	0.215682	0.534481	126.579	0.122338	0.314147	0.8111	0.59	0.9122	0.85	0.7726
TCGA-AO-A126-01A-11D-A10N-05	BRCA_luminal	39	Cancer	0.677839	9602.77	0.211972	0.572927	109.174	0.121366	0.222566	0.722	0.74	0.9965	0.85	0.8614
TCGA-EW-A1IX-01A-12D-A145-05	BRCA_luminal	48	Cancer	0.367274	2570.37	0.0822306	0.32907	100.32	0.223966	0.395427	0.7194	0.55	0.7696	0.85	0.7242
TCGA-S3-A6ZG-01A-22D-A32T-05	BRCA_luminal	71	Cancer	0.776216	19493.2	0.418639	0.701087	147.55	0.175853	0.399463	0.8259		0.8993	0.6	0.7741
TCGA-EW-A424-01A-11D-A244-05	BRCA_luminal	51	Cancer	0.698453	15676.9	0.366368	0.621268	126.573	0.116981	0.27694	0.8593		0.9472	0.7	0.8806
TCGA-AR-A24X-01A-11D-A16A-05	BRCA_luminal	52	Cancer	0.681773	12808.2	0.279772	0.565562	124.695	0.113517	0.274988	0.8168	0.72	0.8302	0.85	0.7985
TCGA-A7-A26E-01A-11D-A16A-05	BRCA_luminal	71	Cancer	0.638553	9086.57	0.191666	0.535152	109.552	0.115506	0.254694	0.7752	0.73		0.7	0.7913
TCGA-JL-A3YX-01A-11D-A230-05	BRCA_luminal	46	Cancer	0.66255	9039.35	0.180245	0.497489	123.535	0.205685	0.377519	0.8961		0.8959	0.8	0.8694
TCGA-AR-A0TV-01A-21D-A10P-05	BRCA_luminal	66	Cancer	0.794914	15594.1	0.368915	0.665882	150.663	0.288777	0.510255	0.7956	0.61	0.8471	0.875	0.7775
TCGA-BH-A0DQ-01A-11D-A10P-05	BRCA_luminal	42	Cancer	0.485005	5008.9	0.116322	0.353294	128.995	0.301815	0.430294	0.7026	0.63	0.8903	0.75	0.7869
TCGA-B6-A0RN-01A-12D-A10P-05	BRCA_luminal	60	Cancer	0.828077	12823.4	0.293861	0.67313	141.619	0.209685	0.329005	0.8298	0.8	0.9681	0.85	0.8504
TCGA-S3-A6ZF-01A-32D-A32T-05	BRCA_luminal	64	Cancer	0.731368	11492.3	0.255229	0.582453	122.742	0.187203	0.335737	0.7924		0.7501	0.6	0.7286
TCGA-D8-A73W-01A-22D-A357-05	BRCA_luminal	79	Cancer	0.628497	14029.5	0.297563	0.567166	134.453	0.226731	0.397551	0.6848		0.7906	0.8	0.7887
TCGA-E9-A1NG-01A-21D-A14N-05	BRCA_luminal	62	Cancer	0.341644	2307.35	0.0723586	0.284081	112.346	0.14514	0.327428	0.5456	0.34	0.6605	0.6	0.5605
TCGA-BH-A0AZ-01A-21D-A12R-05	BRCA_luminal	47	Cancer	0.48346	4968.78	0.124333	0.409894	107.257	0.161805	0.33719	0.6505	0.53	0.8696	0.7	0.6655
TCGA-OL-A66J-01A-11D-A29O-05	BRCA_luminal	80	Cancer	0.70341	12797.6	0.271999	0.479613	129.048	0.31817	0.453799	0.7669		0.7959	0.8	0.7019
TCGA-AQ-A1H2-01A-11D-A13K-05	BRCA_luminal	84	Cancer	0.785443	10309.8	0.231595	0.603678	134.522	0.424385	0.549075	0.8658	0.89	0.9361	0.6	0.894
TCGA-E2-A1IL-01A-11D-A14H-05	BRCA_luminal	78	Cancer	0.514801	4460.6	0.113588	0.44604	101.317	0.220391	0.368354	0.831	0.76	0.9418	0.65	0.8323
TCGA-D8-A1XO-01A-11D-A14N-05	BRCA_luminal	56	Cancer	0.526264	6089.96	0.14566	0.43848	118.338	0.15	0.309435	0.7034	0.65	0.7791	0.8	0.7386
TCGA-AC-A4ZE-01A-11D-A41Q-05	BRCA_luminal	63	Cancer	0.837098	22804.8	0.517492	0.724467	149.978	0.315979	0.440399	0.8763			0.9	0.8169
TCGA-LL-A6FP-01A-11D-A31V-05	BRCA_luminal	90	Cancer	0.887585	10432.5	0.231167	0.583648	160.891	0.57616	0.647773	0.9617		0.9375	0.8	0.9584
TCGA-GM-A4E0-01A-12D-A268-05	BRCA_luminal	67	Cancer	0.475434	10798	0.225009	0.390795	116.387	0.123982	0.280641	0.4885		0.6231	0.8	0.5918
TCGA-AQ-A7U7-01A-22D-A357-05	BRCA_luminal	55	Cancer	0.524291	11782.5	0.264774	0.461151	117.297	0.108462	0.318912	0.4054		0.5635	0.6	0.5218
TCGA-BH-A1F5-01A-12D-A13K-05	BRCA_luminal	62	Cancer	0.585111	5616.49	0.139487	0.430612	105.73	0.209228	0.378003	0.8773	0.83	0.9317	0.85	0.8969
TCGA-BH-A0BC-01A-22D-A10P-05	BRCA_luminal	60	Cancer	0.506883	4119.81	0.117336	0.418229	101.088	0.13357	0.284868	0.6221	0.6	0.8221	0.8	0.7727
TCGA-D8-A1JC-01A-11D-A13K-05	BRCA_luminal	59	Cancer	0.576025	4607.57	0.128135	0.395391	94.7853	0.259481	0.372171	0.7618	0.74	0.824	0.75	0.832
TCGA-E2-A105-01A-11D-A10N-05	BRCA_luminal	79	Cancer	0.877741	21268.5	0.435095	0.726169	139.445	0.252074	0.349684	0.9264	0.83	1	0.88	0.9302
TCGA-D8-A27N-01A-11D-A16G-05	BRCA_luminal	36	Cancer	0.634079	11636.5	0.267371	0.514503	124.089	0.159484	0.374428	0.6589	0.58	0.814	0.85	0.7521
TCGA-E2-A570-01A-11D-A29O-05	BRCA_luminal	47	Cancer	0.530282	5885.5	0.127408	0.452467	105.521	0.161637	0.313352	0.7985		0.8867	0.7	0.7913
TCGA-BH-A0DP-01A-21D-A10P-05	BRCA_luminal	60	Cancer	0.646501	11369.2	0.256847	0.560749	131.03	0.167288	0.328927	0.7037	0.42	0.8565	0.7	0.655
TCGA-E9-A1NE-01A-21D-A14N-05	BRCA_luminal	28	Cancer	0.367185	4558.83	0.11168	0.317393	114.216	0.0678303	0.252515	0.52		0.5369	0.85	0.4246
TCGA-AR-A24T-01A-11D-A16A-05	BRCA_luminal	46	Cancer	0.589443	12797.4	0.314259	0.526285	123.026	0.0823842	0.20706	0.6642	0.52	0.8577	0.8	0.746
TCGA-C8-A273-01A-11D-A16G-05	BRCA_luminal	29	Cancer	0.678546	9083.23	0.222668	0.505385	142.531	0.178831	0.260365	0.8166	0.74	0.9104	0.9	0.8503
TCGA-E9-A1N6-01A-11D-A145-05	BRCA_luminal	52	Cancer	0.518615	6244.06	0.144211	0.410874	111.254	0.158107	0.319991	0.759	0.49	0.8029	0.8	0.7431
TCGA-LD-A7W6-01A-81D-A357-05	BRCA_luminal	54	Cancer	0.584436	9872.78	0.218903	0.522755	134.613	0.173666	0.315799	0.8229		0.9206	0.8	0.8806
TCGA-BH-A0B2-01A-11D-A10N-05	BRCA_luminal		Cancer	0.579524	7972.97	0.164888	0.527327	119.817	0.114831	0.259698			0.7789	0.7	0.7749
TCGA-AR-A2LN-01A-21D-A18O-05	BRCA_luminal	65	Cancer	0.48149	7636.31	0.17211	0.408324	115.637	0.191962	0.375754	0.6576	0.42	0.7825	0.75	0.6702
TCGA-A8-A0AD-01A-11D-A10P-05	BRCA_luminal	83	Cancer	0.631799	6826.13	0.132657	0.39859	129.503	0.369636	0.476586	0.7026	0.61	0.7946	0.835	0.7413
TCGA-E9-A1R4-01A-21D-A14H-05	BRCA_luminal	66	Cancer	0.495235	8115.37	0.18896	0.4366	100.756	0.198983	0.430012	0.6623	0.38	0.5896	0.9	0.5522
TCGA-A1-A0SN-01A-11D-A145-05	BRCA_luminal	50	Cancer	0.64171	16779	0.388231	0.542378	122.499	0.13863	0.310651	0.6933	0.5	0.7542	0.8	0.6915
TCGA-EW-A423-01A-11D-A244-05	BRCA_luminal	75	Cancer	0.776196	16342	0.378353	0.669002	142.026	0.183924	0.319743	0.8129		0.9179	0.95	0.7564
TCGA-C8-A1HE-01A-11D-A13K-05	BRCA_luminal	59	Cancer	0.680904	12564.1	0.283115	0.626236	121.068	0.0909287	0.262634	0.8433	0.79	0.9405	0.95	0.8548
TCGA-A7-A3RF-01A-11D-A22B-05	BRCA_luminal	79	Cancer	0.574309	8467.79	0.185755	0.516794	124.889	0.301416	0.432875	0.9155	0.83	0.8553	0.75	0.8802
TCGA-WT-AB44-01A-11D-A41Q-05	BRCA_luminal	77	Cancer	0.698948	11335	0.254463	0.5486	130.102	0.142152	0.244319	0.7767			0.65	0.7493
TCGA-EW-A1PE-01A-11D-A145-05	BRCA_luminal	56	Cancer	0.560885	8999.9	0.175908	0.461967	111.986	0.191735	0.389915	0.6452	0.53	0.7423	0.75	0.5971
TCGA-BH-A1EX-01A-11D-A13K-05	BRCA_luminal	67	Cancer	0.599137	7617.13	0.175153	0.495419	105.818	0.269698	0.465445	0.6948	0.64	0.761	0.6	0.7618
TCGA-A2-A0YL-01A-21D-A10A-05	BRCA_luminal	48	Cancer	0.447968	5077.3	0.125445	0.399476	99.8016	0.131757	0.284136	0.7417	0.33	0.8562	0.775	0.7032
TCGA-B6-A1KI-01A-11D-A14N-05	BRCA_luminal	63	Cancer	0.499244	5950.41	0.132653	0.365685	98.0572	0.186647	0.342897	0.8413	0.43	0.7886	0.8	0.7888
TCGA-EW-A1J1-01A-11D-A13K-05	BRCA_luminal	38	Cancer	0.364466	1813.97	0.0644592	0.230264	100.67	0.311025	0.459099	0.7873	0.75	0.7951	0.8	0.834
TCGA-BH-A1FJ-01A-11D-A13K-05	BRCA_luminal	66	Cancer	0.829805	13031	0.306244	0.653052	160.061	0.266715	0.34686	0.9257	0.93	1	0.8	0.9548
TCGA-BH-A0BS-01A-11D-A12R-05	BRCA_luminal	55	Cancer	0.586454	5839.23	0.139102	0.417187	133.261	0.235941	0.378731	0.9038	0.74	0.9232	0.825	0.8722
TCGA-BH-A0E2-01A-11D-A10P-05	BRCA_luminal	49	Cancer	0.806145	13882.6	0.285855	0.666243	137.933	0.120361	0.241289	0.7979	0.8	0.9202	0.875	0.8287
TCGA-A2-A0T7-01A-21D-A10P-05	BRCA_luminal	51	Cancer	0.546945	5337.96	0.130879	0.435357	111.223	0.133531	0.301566	0.7746	0.49	0.8685	0.8	0.7923
TCGA-AC-A2BM-01A-11D-A21R-05	BRCA_luminal	41	Cancer	0.661361	9724.84	0.245193	0.519149	137.431	0.160414	0.286278	0.8085	0.57	0.7782	0.9	0.727
TCGA-AR-A24L-01A-11D-A16A-05	BRCA_luminal	26	Cancer	0.446282	3774.43	0.0970809	0.299148	105.684	0.183285	0.316872	0.7817	0.59	0.8305	0.8	0.7182
TCGA-BH-A0E1-01A-11D-A10P-05	BRCA_luminal	52	Cancer	0.642354	5832.06	0.138178	0.426262	104.938	0.0917899	0.241824	0.8676	0.75	0.9742	0.825	0.8524
TCGA-D8-A1X6-01A-11D-A14N-05	BRCA_luminal	80	Cancer	0.56084	6409.55	0.142943	0.410716	123.892	0.435631	0.555694	0.7748	0.69	0.779	0.95	0.7399
TCGA-LL-A5YL-01A-12D-A29O-05	BRCA_luminal	64	Cancer	0.654429	15308.1	0.331595	0.606597	133.743	0.104137	0.221079	0.7509		0.8026	0.6	0.7466
TCGA-AR-A2LL-01A-11D-A17Z-05	BRCA_luminal	70	Cancer	0.647016	12100.2	0.268685	0.548608	131.813	0.116226	0.272499	0.7918	0.71	0.8268	0.75	0.8337
TCGA-AC-A7VB-01A-11D-A357-05	BRCA_luminal	51	Cancer	0.898943	27104.2	0.645978	0.795943	155.578	0.24164	0.336857	0.9664		0.9477	0.9	0.9649
TCGA-D8-A1J9-01A-11D-A13K-05	BRCA_luminal	48	Cancer	0.671629	13748.2	0.325379	0.557775	125.315	0.140701	0.289394	0.7551	0.52	0.8843	0.92	0.667
TCGA-C8-A1HO-01A-11D-A13K-05	BRCA_luminal	34	Cancer	0.804993	18831.1	0.409094	0.703209	145.327	0.126329	0.259693	0.8967	0.83	0.942	0.7	0.9101
TCGA-BH-A1FG-01A-11D-A13K-05	BRCA_luminal	88	Cancer	0.585276	7843.03	0.16839	0.465148	116.414	0.112995	0.325448	0.8741	0.85	0.9453	0.6	0.9042
TCGA-AC-A8OP-01A-11D-A36K-05	BRCA_luminal	72	Cancer	0.704617	17901.5	0.409793	0.577702	136.173	0.190747	0.27744	0.8083		0.7679	0.7	0.762
TCGA-D8-A1XG-01A-11D-A14H-05	BRCA_luminal	86	Cancer	0.474038	6642.08	0.139934	0.441319	131.256	0.163849	0.365417	0.8763	0.83	0.9269	0.85	0.8957
TCGA-D8-A1XB-01A-11D-A14H-05	BRCA_luminal	62	Cancer	0.592653	8995.61	0.199187	0.498992	121.79	0.141662	0.298227	0.799	0.79	0.9028	0.7	0.8248
TCGA-D8-A1JI-01A-11D-A13K-05	BRCA_luminal	54	Cancer	0.718389	11063.9	0.251054	0.56477	149.673	0.420699	0.496553	0.8944	0.81	0.9178	0.95	0.899
TCGA-E9-A1N5-01A-11D-A14H-05	BRCA_luminal	45	Cancer	0.542598	8444.11	0.182922	0.465991	110.735	0.118002	0.304262	0.6689	0.66	0.7922	0.8	0.6748
TCGA-EW-A1P0-01A-11D-A145-05	BRCA_luminal	55	Cancer	0.669384	8492.6	0.174901	0.560916	123.671	0.208387	0.323376	0.8355	0.83	0.8574	0.75	0.8404
TCGA-D8-A1J8-01A-11D-A13K-05	BRCA_luminal	77	Cancer	0.653394	13110.4	0.342591	0.574588	128.085	0.131488	0.352042	0.6757	0.69	0.75	0.9	0.7215
TCGA-GI-A2C8-01A-11D-A16G-05	BRCA_luminal	63	Cancer	0.643928	14475.3	0.328148	0.548633	128.625	0.221003	0.392317	0.601	0.48	0.7846	0.85	0.6998
TCGA-LL-A7SZ-01A-32D-A357-05	BRCA_luminal	49	Cancer	0.53639	10161.7	0.218341	0.486745	131.335	0.255767	0.523095	0.6321		0.5347	0.7	0.5109
TCGA-A2-A25C-01A-11D-A16A-05	BRCA_luminal	50	Cancer	0.49539	6744.39	0.157142	0.462073	123.6	0.146664	0.317978	0.7799	0.65	0.811	0.82	0.7454
TCGA-EW-A3E8-01B-11D-A244-05	BRCA_luminal	60	Cancer	0.588583	14803.7	0.341974	0.553474	129.82	0.162181	0.354293	0.6305		0.6887	0.8	0.6689
TCGA-E2-A10E-01A-21D-A10N-05	BRCA_luminal	64	Cancer	0.760282	12505.4	0.271558	0.677455	138.391	0.131924	0.2462	0.8444	0.86	0.9609	0.775	0.9071
TCGA-D8-A1JB-01A-11D-A13K-05	BRCA_luminal	54	Cancer	0.41727	7025.77	0.157003	0.379526	98.9165	0.0886096	0.301284	0.6319	0.27	0.6531	0.6	0.4648
TCGA-BH-A0BJ-01A-11D-A10P-05	BRCA_luminal	41	Cancer	0.339896	3917	0.0934759	0.362706	110.149	0.120114	0.32109	0.7386	0.37	0.8453	0.7	0.7458
TCGA-EW-A2FS-01A-11D-A17F-05	BRCA_luminal	41	Cancer	0.572576	14443.7	0.314393	0.516809	129.141	0.182431	0.365664	0.8113	0.56	0.7147	0.7	0.7268
TCGA-D8-A1XU-01A-11D-A14N-05	BRCA_luminal	56	Cancer	0.597967	13324.7	0.28874	0.507865	126.77	0.164347	0.306694	0.7462	0.67	0.8103	0.8	0.805
TCGA-EW-A2FV-01A-11D-A17F-05	BRCA_luminal	39	Cancer	0.51551	9380.11	0.206745	0.434093	112.623	0.254953	0.405286	0.7344	0.4	0.7641	0.6	0.7037
TCGA-BH-A0H3-01A-11D-A12R-05	BRCA_luminal	46	Cancer	0.55451	6715.79	0.144682	0.482732	100.053	0.0755682	0.235168	0.7093	0.52	0.8538	0.6	0.656
TCGA-D8-A27R-01A-11D-A16G-05	BRCA_luminal	41	Cancer	0.58012	6161.48	0.164306	0.391337	103.779	0.103614	0.278291	0.753	0.4	0.7043	0.8	0.6439
TCGA-B6-A0X4-01A-11D-A10A-05	BRCA_luminal	62	Cancer	0.532355	3148.55	0.0827166	0.356998	105.298	0.216424	0.337951	0.9804	0.68	0.9749	0.85	0.9189
TCGA-A8-A0A6-01A-12D-A10P-05	BRCA_luminal	64	Cancer	0.618288	10205.4	0.251987	0.551586	121.851	0.0984837	0.256994	0.6481	0.31	0.8049	0.75	0.6691
TCGA-A7-A4SC-01A-12D-A268-05	BRCA_luminal	62	Cancer	0.573905	11553.1	0.275134	0.501076	117.106	0.0873615	0.216168	0.7525		0.7981	0.6	0.7975
TCGA-AR-A1AM-01A-41D-A22B-05	BRCA_luminal	52	Cancer	0.401321	4669.06	0.113172	0.362086	100.714	0.155906	0.329369	0.7638	0.45	0.76	0.7	0.7182
TCGA-E9-A295-01A-11D-A16G-05	BRCA_luminal	71	Cancer	0.660365	12413	0.29492	0.521618	132.716	0.185822	0.348497	0.8175	0.47	0.8883	0.6	0.7547
TCGA-BH-A0HF-01A-11D-A10P-05	BRCA_luminal	77	Cancer	0.472068	4096.82	0.113862	0.381857	102.71	0.151918	0.312671	0.678	0.51	0.8328	0.7	0.7424
TCGA-AC-A23E-01A-11D-A161-05	BRCA_luminal	50	Cancer	0.560353	8326.5	0.192041	0.483414	107.333	0.180393	0.336146	0.6398	0.5	0.8597	0.7	0.5792
TCGA-AR-A252-01A-11D-A16A-05	BRCA_luminal	50	Cancer	0.352487	6856.11	0.158234	0.383754	109.37	0.105131	0.325914	0.4909		0.4924	0.8	0.4382
TCGA-E9-A245-01A-22D-A16G-05	BRCA_luminal	47	Cancer	0.421525	3785.03	0.089942	0.312739	99.7263	0.243811	0.407346	0.9071	0.49	0.9007	0.75	0.8825
TCGA-AO-A12B-01A-11D-A10N-05	BRCA_luminal	63	Cancer	0.631825	8383.32	0.152786	0.460213	123.787	0.240708	0.34515	0.907	0.78	0.9893	0.95	0.9025
TCGA-A2-A0YD-01A-11D-A10A-05	BRCA_luminal	63	Cancer	0.57231	7858.31	0.187116	0.476221	123.781	0.11222	0.263413	0.6129	0.5	0.8334	0.9	0.7142
TCGA-AO-A125-01A-11D-A10N-05	BRCA_luminal	72	Cancer	0.929814	13018	0.276075	0.718775	153.463	0.277857	0.410952	0.9687	0.96	1	0.96	0.984
TCGA-AC-A3QP-01A-11D-A230-05	BRCA_luminal	79	Cancer	0.480614	4643.2	0.112561	0.418358	97.9182	0.134954	0.316902	0.654		0.8036	0.6	0.804
TCGA-B6-A0RO-01A-22D-A10P-05	BRCA_luminal	71	Cancer	0.61547	7279.51	0.162879	0.530427	104.447	0.195564	0.303716	0.9177	0.51	0.9022	0.8	0.8227
TCGA-A2-A25D-01A-12D-A16G-05	BRCA_luminal	90	Cancer	0.610107	12387	0.251413	0.515757	123.342	0.198763	0.433834	0.647	0.57	0.6707	0.8	0.6756
TCGA-E9-A1R7-01A-11D-A14N-05	BRCA_luminal	64	Cancer	0.630312	13512	0.311041	0.535915	126.907	0.151358	0.326113	0.9195	0.66	0.8459	0.8	0.8212
TCGA-EW-A1IY-01A-11D-A13K-05	BRCA_luminal	38	Cancer	0.535102	7691.54	0.165783	0.408367	109.545	0.0945048	0.302619	0.6124		0.651	0.7	0.6246
TCGA-E9-A1R3-01A-31D-A14N-05	BRCA_luminal	70	Cancer	0.434433	4230.77	0.10672	0.391389	102.573	0.224295	0.453617	0.7013	0.48	0.7451	0.82	0.6115
TCGA-GM-A2DO-01A-11D-A18O-05	BRCA_luminal	54	Cancer	0.425434	8748.6	0.199136	0.369749	120.356	0.177241	0.415	0.5188	0.93	0.3722	0.9	0.5741
TCGA-AO-A03L-01A-41D-A10P-05	BRCA_luminal	34	Cancer	0.683809	13397.7	0.296908	0.537324	136.812	0.281934	0.445261	0.7555	0.52	0.8408	0.7	0.7349
TCGA-AC-A3BB-01A-21D-A19Z-05	BRCA_luminal	46	Cancer	0.479691	8231	0.187912	0.432485	104.167	0.150945	0.37245	0.5719	0.26	0.6562	0.85	0.5299
TCGA-OL-A66O-01A-11D-A31V-05	BRCA_luminal	39	Cancer	0.796433	17998.7	0.39358	0.670884	152.755	0.237259	0.309494	0.9071		0.9822	0.8	0.8843
TCGA-E9-A5UO-01A-11D-A28C-05	BRCA_luminal	41	Cancer	0.856709	16639.5	0.374674	0.682582	155.396	0.247138	0.322457	0.97		0.9623	0.95	0.9698
TCGA-AO-A0JJ-01A-11D-A10P-05	BRCA_luminal	54	Cancer	0.576379	9282.92	0.216078	0.50981	121.278	0.156721	0.274331	0.5735	0.51	0.8083	0.7	0.6854
TCGA-A2-A0EP-01A-52D-A230-05	BRCA_luminal	56	Cancer	0.32302	4814.22	0.115304	0.303203	95.4033	0.0583891	0.248419	0.291		0.4183	0.75	0.3512
TCGA-D8-A3Z6-01A-11D-A23D-05	BRCA_luminal	56	Cancer	0.566173	9592.46	0.226216	0.537915	134.423	0.188008	0.29601	0.8258		0.9096	0.75	0.7739
TCGA-GM-A2DI-01A-31D-A18O-05	BRCA_luminal	52	Cancer	0.302305	4738.4	0.111382	0.299364	95.6527	0.113641	0.364936	0.4423	0.22	0.4623	0.8	0.3872
TCGA-D8-A1Y1-01A-21D-A14N-05	BRCA_luminal	80	Cancer	0.613525	9522.8	0.208063	0.475825	126.82	0.277274	0.454692	0.7145	0.59	0.8077	0.9	0.6898
TCGA-S3-AA12-01A-11D-A41Q-05	BRCA_luminal	82	Cancer	0.87466	10339.7	0.224131	0.446763	156.799	0.507067	0.518343	0.916			0.8	0.7992
TCGA-A2-A0T4-01A-31D-A10P-05	BRCA_luminal	62	Cancer	0.586767	10915	0.259476	0.516948	123.459	0.121488	0.215144	0.6565	0.49	0.772	0.8	0.6972
TCGA-E9-A227-01A-11D-A161-05	BRCA_luminal	42	Cancer	0.437894	4415.25	0.0953293	0.369905	103.21	0.175484	0.352278	0.6917	0.56	0.6461	0.8	0.6158
TCGA-A7-A3J1-01A-11D-A212-05	BRCA_luminal	63	Cancer	0.513387	8161.32	0.201485	0.465766	121.23	0.14297	0.301638	0.6212	0.55	0.7271	0.9	0.6485
TCGA-E9-A5UP-01A-11D-A28C-05	BRCA_luminal	63	Cancer	0.782814	13235.7	0.287836	0.592334	123.296	0.147615	0.341327	0.9306		0.9088	0.9	0.9162
TCGA-V7-A7HQ-01A-11D-A33F-05	BRCA_luminal	75	Cancer	0.524689	4945.2	0.11937	0.423956	101.687	0.192087	0.376855	0.8283		0.9088	0.7	0.7774
TCGA-PE-A5DC-01A-12D-A27Y-05	BRCA_luminal	72	Cancer	0.748408	16664.4	0.363387	0.620847	137.2	0.340074	0.514927	0.8743			0.85	0.7709
TCGA-AC-A8OR-01A-21D-A41Q-05	BRCA_luminal	75	Cancer	0.44182	4636.75	0.11902	0.333504	99.4871	0.157815	0.338771	0.9181			0.96	0.8006
TCGA-LL-A442-01A-11D-A244-05	BRCA_luminal	56	Cancer	0.516849	4486.6	0.104653	0.358577	105.851	0.250307	0.434345	0.8419		0.8025	0.9	0.7959
TCGA-BH-A0HK-01A-11D-A10P-05	BRCA_luminal	81	Cancer	0.841124	22723.8	0.478288	0.730803	143.68	0.186847	0.347733	0.7649	0.78	0.9163	0.925	0.8357
TCGA-C8-A3M7-01A-12D-A21R-05	BRCA_luminal	60	Cancer	0.524165	8031.12	0.18978	0.450915	110.523	0.156754	0.369696	0.7643	0.42	0.721	0.8	0.6962
TCGA-BH-A6R8-01A-21D-A33F-05	BRCA_luminal	46	Cancer	0.675192	5971.42	0.156779	0.445901	124.531	0.340059	0.422065	0.8101		0.81	0.85	0.7913
TCGA-E9-A22E-01A-11D-A161-05	BRCA_luminal	56	Cancer	0.434578	4156.08	0.100944	0.312373	100.703	0.243922	0.406053	0.5708	0.42	0.894	0.75	0.6539
TCGA-D8-A1XD-01A-11D-A14H-05	BRCA_luminal	36	Cancer	0.633828	7748.15	0.16753	0.476377	120.326	0.14283	0.291713	0.8792	0.78	0.9754	0.75	0.8916
TCGA-AN-A0XP-01A-11D-A10A-05	BRCA_luminal	69	Cancer	0.624774	9618.35	0.21006	0.530984	132.64	0.316932	0.398232	0.8264	0.57	0.8996	0.8	0.8277
TCGA-AR-A1AW-01A-21D-A12R-05	BRCA_luminal	65	Cancer	0.538263	11182.1	0.24995	0.465089	116.35	0.0879991	0.310208	0.408	0.24	0.4436	0.7	0.3857
TCGA-C8-A274-01A-11D-A16G-05	BRCA_luminal	63	Cancer	0.79837	14122.7	0.33402	0.662182	135.635	0.148862	0.26462	0.8969	0.79	0.9611	0.85	0.8912
TCGA-BH-A8G0-01A-11D-A357-05	BRCA_luminal	54	Cancer	0.422251	6180.48	0.142857	0.397922	103.735	0.0861623	0.256755	0.5613		0.6822	0.6	0.6126
TCGA-AR-A1AU-01A-11D-A12R-05	BRCA_luminal	39	Cancer	0.582606	6110.45	0.147842	0.425191	124.243	0.0984234	0.243017	0.8189	0.51	0.9182	0.8	0.7646
TCGA-BH-A0DV-01A-21D-A12R-05	BRCA_luminal	54	Cancer	0.458198	4990.95	0.128904	0.373432	110.886	0.0904284	0.253122	0.6021	0.31	0.7631	0.7	0.4856
TCGA-E2-A1BD-01A-11D-A12R-05	BRCA_luminal	53	Cancer	0.803958	11420.3	0.258175	0.654319	129.568	0.115317	0.277736	0.8409	0.65	0.98	0.9	0.7929
TCGA-AO-A12E-01A-11D-A10N-05	BRCA_luminal	51	Cancer	0.679472	17721.6	0.393949	0.583046	132.97	0.1803	0.331132	0.7656	0.56	0.9121	0.75	0.6979
TCGA-AR-A0TT-01A-31D-A10P-05	BRCA_luminal	53	Cancer	0.601866	8796.85	0.200381	0.443489	110.326	0.193496	0.4252	0.4679	0.4	0.5429	0.8	0.5199
TCGA-A2-A0T6-01A-11D-A10P-05	BRCA_luminal	50	Cancer	0.634477	13056.2	0.307666	0.557118	128.707	0.0869504	0.207303	0.5697	0.55	0.7721	0.775	0.7257
TCGA-E9-A1RG-01A-11D-A14H-05	BRCA_luminal	62	Cancer	0.477701	2470.43	0.0741921	0.334382	110.779	0.381653	0.538784	0.8038	0.71	0.7913	0.85	0.7904
TCGA-AC-A2FE-01A-11D-A19Z-05	BRCA_luminal	62	Cancer	0.52805	15307	0.344724	0.496373	120.528	0.0774953	0.307855	0.5556	0.37	0.5977	0.75	0.5379
TCGA-5L-AAT0-01A-12D-A41Q-05	BRCA_luminal	42	Cancer	0.506518	6198.88	0.150972	0.42971	105.268	0.18169	0.32581	0.6635			0.7	0.6501
TCGA-AC-A2B8-01A-11D-A17F-05	BRCA_luminal	84	Cancer	0.57229	9903.9	0.221695	0.477137	104.846	0.182715	0.361061	0.6425	0.53	0.7262	0.75	0.6892
TCGA-E9-A1N6-11A-32D-A145-05	BRCA_luminal	52	Normal	0.160148	1057.84	0.0498845	0.191859	90.2743	0.0634944	0.252793
TCGA-BH-A1FN-11A-34D-A13T-05	BRCA_luminal	34	Normal	0.101801	263.869	0.0355993	0.123671	88.4011	0.0622916	0.236917
TCGA-BH-A209-11A-42D-A161-05	BRCA_luminal	77	Normal	0.166246	1525.82	0.0589072	0.173257	87.8193	0.0664778	0.213495
TCGA-AC-A2FF-11A-13D-A17F-05	BRCA_luminal	40	Normal	0.185637	1827.88	0.0635427	0.217892	90.8794	0.0634459	0.226467
TCGA-A7-A13F-11A-42D-A12R-05	BRCA_luminal	44	Normal	0.116597	308.512	0.0372377	0.161027	88.3219	0.055722	0.218195
TCGA-A7-A13G-11A-51D-A13T-05	BRCA_luminal	79	Normal	0.0756888	-202.879	0.0279846	0.0785726	87.6272	0.0527949	0.21883
TCGA-BH-A1FD-11B-21D-A13T-05	BRCA_luminal	68	Normal	0.149549	715.556	0.0447017	0.166995	90.2309	0.0595623	0.2184
TCGA-BH-A1FB-11A-33D-A13T-05	BRCA_luminal	60	Normal	0.170184	1283.44	0.0528007	0.230566	89.2612	0.0555431	0.219245
TCGA-AC-A2FM-11B-32D-A19Z-05	BRCA_luminal	87	Normal	0.147859	716.762	0.0436207	0.204373	88.1166	0.0502461	0.210962
TCGA-BH-A1FH-11B-42D-A13T-05	BRCA_luminal	47	Normal	0.096101	93.5074	0.0325935	0.140063	88.4291	0.0565608	0.219994
TCGA-E9-A1RD-11A-33D-A161-05	BRCA_luminal	67	Normal	0.131121	1065.37	0.0494972	0.153748	88.8068	0.0667798	0.241403
TCGA-E9-A1NG-11A-52D-A14N-05	BRCA_luminal	62	Normal	0.0981469	214.212	0.0348769	0.126733	88.3443	0.0525483	0.20236
TCGA-BH-A0DH-11A-31D-A10Q-05	BRCA_luminal	63	Normal	0.279918	2481.45	0.0837474	0.276349	93.445	0.0877074	0.193074
TCGA-E9-A1NA-11A-33D-A145-05	BRCA_luminal	58	Normal	0.150958	1338.71	0.0568297	0.177402	89.1031	0.0544805	0.22197
TCGA-E2-A1B5-11A-23D-A12R-05	BRCA_luminal	46	Normal	0.134097	367.875	0.0383221	0.192803	87.9857	0.051856	0.189535
TCGA-A7-A0D9-11A-53D-A10Q-05	BRCA_luminal	37	Normal	0.053427	-427.924	0.0236032	0.069274	86.7841	0.0478943	0.146702
TCGA-BH-A1ES-11A-33D-A138-05	BRCA_luminal	35	Normal	0.140367	754.77	0.0436455	0.191839	88.6957	0.0745813	0.216706
TCGA-BH-A0BZ-11A-61D-A12R-05	BRCA_luminal	59	Normal	0.145704	882.088	0.047618	0.176859	89.524	0.0516485	0.205183
TCGA-BH-A0DK-11A-13D-A10Q-05	BRCA_luminal	49	Normal	0.284947	2851.7	0.0819373	0.347229	102.067	0.0678775	0.183344
TCGA-BH-A0C3-11A-23D-A12R-05	BRCA_luminal	47	Normal	0.191521	1806.1	0.0635195	0.22532	91.0674	0.0720721	0.210051
TCGA-BH-A1EO-11A-31D-A138-05	BRCA_luminal	68	Normal	0.0810549	121.618	0.0346369	0.102161	88.247	0.0517417	0.203581
TCGA-E9-A1RI-11A-41D-A16A-05	BRCA_luminal	43	Normal	0.0936533	156.328	0.0350357	0.105703	87.6389	0.0611615	0.207274
TCGA-BH-A1F8-11B-21D-A13T-05	BRCA_luminal	90	Normal	0.155429	1167.67	0.0506814	0.183625	89.4557	0.0524451	0.207098
TCGA-BH-A0H9-11A-22D-A093-05	BRCA_luminal	69	Normal	0.0680025	-385.692	0.0249541	0.0893176	88.122	0.0818305	0.190699
TCGA-E9-A1RF-11A-32D-A161-05	BRCA_luminal	68	Normal	0.103246	283.877	0.0369223	0.0949869	85.5178	0.0799126	0.214325
TCGA-BH-A1EW-11B-33D-A138-05	BRCA_luminal	38	Normal	0.353463	5350.5	0.124905	0.361054	95.0295	0.0688704	0.227122
TCGA-BH-A0DI-11A-32D-A12R-05	BRCA_luminal	63	Normal	0.22303	1518.75	0.0578607	0.327519	90.8914	0.067186	0.235525
TCGA-E2-A15K-11A-13D-A12R-05	BRCA_luminal	58	Normal	0.145799	1100.7	0.0524008	0.155895	90.2905	0.0693257	0.194688
TCGA-BH-A1F2-11A-32D-A13T-05	BRCA_luminal	53	Normal	0.09123	130.147	0.0326151	0.138828	87.959	0.0559425	0.217855
TCGA-E9-A1N4-11A-33D-A14N-05	BRCA_luminal	41	Normal	0.225194	1650.82	0.0594941	0.256556	93.7987	0.0754676	0.251614
TCGA-BH-A0BA-11A-22D-A10Q-05	BRCA_luminal	51	Normal	0.198236	2326.54	0.0691412	0.264768	89.1973	0.079018	0.202564
TCGA-BH-A0HA-11A-31D-A12R-05	BRCA_luminal	31	Normal	0.148337	533.794	0.0423298	0.210757	88.5076	0.0550788	0.210335
TCGA-E2-A1BC-11A-32D-A12R-05	BRCA_luminal	63	Normal	0.0603318	-313.841	0.026409	0.0869355	87.5695	0.0475178	0.200981
TCGA-BH-A0DQ-11A-12D-A10Q-05	BRCA_luminal	42	Normal	0.176566	578.967	0.042866	0.20201	91.0238	0.0849883	0.216613
TCGA-AC-A2FB-11A-13D-A17F-05	BRCA_luminal	65	Normal	0.143989	1271.52	0.0471606	0.167925	88.5344	0.0579787	0.21746
TCGA-BH-A1EY-11B-21D-A13T-05	BRCA_luminal	79	Normal	0.170128	1441.82	0.0574889	0.203898	91.7636	0.0518092	0.205166
TCGA-BH-A0DG-11A-43D-A12R-05	BRCA_luminal	30	Normal	0.131357	1016.73	0.044915	0.179133	88.8115	0.0548626	0.209298
TCGA-BH-A0BF-11A-31D-A12R-05	BRCA_luminal	56	Normal	0.165801	1210.87	0.0535014	0.203725	89.8233	0.0655352	0.195509
TCGA-E2-A15I-11A-32D-A138-05	BRCA_luminal	44	Normal	0.0902612	63.9442	0.0322458	0.126387	87.3877	0.0844721	0.226938
TCGA-BH-A1EU-11A-23D-A138-05	BRCA_luminal	83	Normal	0.11863	415.773	0.0376548	0.152817	89.8785	0.0584955	0.192646
TCGA-AC-A2FG-11A-22D-A17F-05	BRCA_luminal	79	Normal	0.23103	2008.42	0.0655898	0.257503	91.3697	0.0674144	0.238967
TCGA-BH-A0AZ-11A-22D-A12R-05	BRCA_luminal	47	Normal	0.146256	554.51	0.0407229	0.197011	90.9682	0.0624056	0.22557
TCGA-E9-A1RB-11A-33D-A161-05	BRCA_luminal	40	Normal	0.141176	872.332	0.0483148	0.151611	86.8635	0.0754751	0.216555
TCGA-BH-A0B8-11A-41D-A093-05	BRCA_luminal	64	Normal	0.0747731	-110.111	0.0291489	0.106365	86.7969	0.055696	0.197044
TCGA-BH-A0BT-11A-21D-A12R-05	BRCA_luminal	56	Normal	0.18231	1268.15	0.0518475	0.220566	89.1233	0.051258	0.1871
TCGA-BH-A1FM-11B-23D-A13T-05	BRCA_luminal	44	Normal	0.124105	568.212	0.0417472	0.173303	89.1059	0.0582965	0.214583
TCGA-BH-A1FJ-11B-42D-A13T-05	BRCA_luminal	66	Normal	0.144644	999.037	0.0504582	0.169387	90.8212	0.0521664	0.209607
TCGA-BH-A0AU-11A-11D-A12R-05	BRCA_luminal	45	Normal	0.179972	957.83	0.0500319	0.236456	91.4183	0.0641918	0.233464
TCGA-E2-A1IO-11A-21D-A145-05	BRCA_luminal	37	Normal	0.142844	1039.42	0.0483243	0.164817	90.2106	0.0594521	0.248122
TCGA-E2-A1IF-11A-22D-A145-05	BRCA_luminal	74	Normal	0.184597	1005.94	0.0494006	0.209117	89.6216	0.0592788	0.237246
TCGA-E9-A1NF-11A-73D-A14H-05	BRCA_luminal	60	Normal	0.0862516	-18.989	0.032667	0.10047	88.1273	0.0536106	0.205633
TCGA-BH-A1ET-11B-23D-A138-05	BRCA_luminal	55	Normal	0.140209	583.096	0.0414049	0.172954	88.9603	0.0625273	0.216687
TCGA-BH-A1FR-11B-42D-A13T-05	BRCA_luminal	73	Normal	0.145261	1063.82	0.0516452	0.180535	90.1209	0.052962	0.211524
TCGA-E9-A1RC-11A-33D-A161-05	BRCA_luminal	56	Normal	0.0931797	157.276	0.0357425	0.0839601	84.3018	0.0615778	0.208013
TCGA-E2-A1L7-11A-33D-A145-05	BRCA_luminal	40	Normal	0.25564	2814.38	0.084133	0.248824	93.0212	0.0664353	0.254003
TCGA-BH-A0H7-11A-13D-A10Q-05	BRCA_luminal	65	Normal	0.408905	3371.8	0.0961041	0.357751	96.9664	0.117112	0.224217
TCGA-BH-A0BJ-11A-23D-A10Q-05	BRCA_luminal	41	Normal	0.115307	331.745	0.0372274	0.178467	88.5525	0.0732575	0.190369
TCGA-BH-A0BM-11A-12D-A093-05	BRCA_luminal	54	Normal	0.100779	389.713	0.0373515	0.191226	89.6466	0.0733691	0.189058
TCGA-BH-A0E1-11A-13D-A10Q-05	BRCA_luminal	52	Normal	0.241378	1944.95	0.0668528	0.291624	89.4314	0.0670782	0.20026
TCGA-BH-A0C0-11A-21D-A10Q-05	BRCA_luminal	62	Normal	0.191977	1875.1	0.0647047	0.302927	89.551	0.0559205	0.187124
TCGA-BH-A204-11A-53D-A161-05	BRCA_luminal	80	Normal	0.110212	311.555	0.038642	0.120852	85.208	0.0715121	0.237975
TCGA-BH-A1FG-11B-12D-A13T-05	BRCA_luminal	88	Normal	0.12539	530.233	0.0395599	0.151943	89.3129	0.0578596	0.231008
TCGA-E9-A1N5-11A-41D-A14H-05	BRCA_luminal	45	Normal	0.166449	1068.58	0.0513257	0.208981	92.174	0.0695721	0.254063
TCGA-BH-A0BC-11A-22D-A093-05	BRCA_luminal	60	Normal	0.121454	278.04	0.036002	0.184983	89.5239	0.0582241	0.198885
TCGA-BH-A0HK-11A-11D-A10Q-05	BRCA_luminal	81	Normal	0.160602	916.027	0.0486084	0.215299	89.8979	0.0649625	0.181316
TCGA-BH-A0DP-11A-12D-A10Q-05	BRCA_luminal	60	Normal	0.352422	3963.42	0.102337	0.389939	97.3835	0.0708051	0.180522
TCGA-BH-A0BS-11A-11D-A12R-05	BRCA_luminal	55	Normal	0.174438	1288.7	0.055209	0.219181	90.9337	0.0587208	0.225952
TCGA-BH-A1FE-11B-14D-A13T-05	BRCA_luminal	31	Normal	0.126805	599.368	0.041914	0.177687	89.3626	0.0626052	0.24263
TCGA-E9-A1R7-11A-42D-A14N-05	BRCA_luminal	64	Normal	0.108808	507.251	0.0406531	0.128583	89.006	0.05685	0.215596
TCGA-BH-A1F5-11A-43D-A13T-05	BRCA_luminal	62	Normal	0.257566	3148.09	0.0866853	0.307012	99.9545	0.076169	0.249265
TCGA-BH-A0DV-11A-22D-A12R-05	BRCA_luminal	54	Normal	0.17404	1509.63	0.0585479	0.206176	90.1089	0.0749319	0.183628
TCGA-E9-A1NE-11A-43D-A14N-05	BRCA_luminal	28	Normal	0.109555	243.624	0.0362307	0.157243	88.2629	0.0513086	0.209923
TCGA-JW-A69B-01A-11D-A32T-05	CESC	44	Cancer	0.85146	24857.5	0.549383	0.626495	132.616	0.104509	0.218629	0.8727		0.8124	0.8	0.8143
TCGA-C5-A1BL-01A-11D-A13Z-05	CESC	32	Cancer	0.756025	20991.1	0.37879	0.563869	129.135	0.353445	0.566844	0.8706		0.5902	0.7	0.7019
TCGA-ZJ-AAXB-01A-11D-A42P-05	CESC	42	Cancer	0.719367	11082.9	0.196315	0.38824	95.0014	0.314169	0.50509	0.9365			0.85	0.8578
TCGA-EK-A2PK-01A-11D-A18K-05	CESC	43	Cancer	0.600676	10536.3	0.193838	0.439551	128.261	0.317284	0.493038	0.728		0.6123	0.9	0.6411
TCGA-FU-A3EO-01A-11D-A212-05	CESC	55	Cancer	0.815747	23642.1	0.568104	0.649056	124.379	0.0561695	0.225374	0.8827		0.9382	0.6	0.8512
TCGA-VS-A9UR-01A-11D-A42P-05	CESC	53	Cancer	0.768981	20671.5	0.402657	0.575152	122.998	0.104136	0.287893	0.9642			0.8	0.9212
TCGA-VS-A9V5-01A-11D-A42P-05	CESC	50	Cancer	0.777747	22527.2	0.504359	0.614962	124.704	0.17452	0.345684	0.9547			0.7	0.8255
TCGA-C5-A3HD-01B-11D-A212-05	CESC	51	Cancer	0.895027	20243	0.368651	0.63506	107.407	0.198647	0.369746	0.9806		0.8498	0.8	0.8583
TCGA-Q1-A5R2-01A-11D-A28C-05	CESC	64	Cancer	0.674896	18755	0.34238	0.504769	130.889	0.230518	0.470314	0.7917		0.7162	0.8	0.7277
TCGA-C5-A1BM-01A-11D-A13Z-05	CESC	78	Cancer	0.58099	9925.44	0.170414	0.453308	135.108	0.212553	0.378717	0.7503		0.5925	0.8	0.6715
TCGA-VS-A9UL-01A-11D-A42P-05	CESC	79	Cancer	0.903288	19027.5	0.419097	0.675271	133.088	0.248672	0.451858	0.9975			0.8	0.9403
TCGA-VS-A8EK-01A-12D-A37Q-05	CESC	65	Cancer	0.770741	21553.9	0.423163	0.604027	145.286	0.269886	0.523488	0.9434		0.7042	0.6	0.7466
TCGA-IR-A3LI-01A-11D-A212-05	CESC	48	Cancer	0.91082	26413.8	0.596293	0.687765	145.702	0.0716093	0.214273	0.9923		0.9771	0.95	1
TCGA-VS-A950-01A-11D-A42P-05	CESC	42	Cancer	0.663632	17978.8	0.338586	0.495487	136.274	0.3873	0.623636	0.9112			0.7	0.8853
TCGA-PN-A8MA-01A-11D-A36K-05	CESC	43	Cancer	0.850872	13744.3	0.275606	0.529568	100.062	0.347373	0.474441	0.876		0.7538	0.8	0.7455
TCGA-MA-AA3Y-01A-11D-A388-05	CESC	48	Cancer	0.57042	13474.3	0.257738	0.456702	114.308	0.128355	0.391305	0.7606		0.5181	0.6	0.6855
TCGA-HM-A6W2-06A-22D-A340-05	CESC	34	Cancer	0.574573	3481.78	0.0909219	0.293758	118.013	0.621329	0.710568	0.9837		0.8118	0.6	0.7913
TCGA-C5-A1ME-01A-11D-A13Z-05	CESC	40	Cancer	0.819682	20142.6	0.437002	0.632932	132.374	0.122884	0.259881	0.8946		0.8535	0.6	0.8627
TCGA-LP-A5U3-01A-11D-A28C-05	CESC	40	Cancer	0.832446	22683.2	0.432382	0.626646	139.108	0.163597	0.437783	0.8943		0.7467	0.7	0.867
TCGA-EA-A410-01A-11D-A244-05	CESC	51	Cancer	0.65378	7807.02	0.163904	0.336108	97.13	0.380051	0.533683	0.881		0.5945	0.75	0.7913
TCGA-IR-A3LA-01A-11D-A230-05	CESC	60	Cancer	0.782801	14481.3	0.262287	0.49464	111.476	0.56236	0.69144	0.9119		0.7732	0.8	0.7683
TCGA-C5-A1MJ-01A-11D-A14Z-05	CESC	61	Cancer	0.731126	19089.9	0.397617	0.527605	123.737	0.168189	0.392867	0.8229		0.8026	0.7	0.7699
TCGA-EK-A2IP-01A-11D-A17Z-05	CESC	28	Cancer	0.804182	19880.8	0.359903	0.564632	144.333	0.263851	0.560397	0.9347		0.8004	0.85	0.836
TCGA-MA-AA3Z-01A-11D-A388-05	CESC	43	Cancer	0.716863	17583.1	0.315134	0.518431	118.395	0.170322	0.456124	0.8979		0.6659	0.8	0.7913
TCGA-EK-A2R7-01A-11D-A18K-05	CESC	45	Cancer	0.70162	13971.3	0.262205	0.49804	101.484	0.198776	0.444985	0.8788		0.711	0.88	0.846
TCGA-VS-A959-01A-11D-A42P-05	CESC	76	Cancer	0.588997	12351.5	0.250689	0.474211	110.627	0.160902	0.36649	0.8583			0.6	0.8047
TCGA-DS-A1OA-01A-11D-A14Z-05	CESC	77	Cancer	0.722789	18048.7	0.366166	0.551717	136.982	0.252596	0.537106	0.7959		0.6851	0.7	0.7019
TCGA-EA-A3HQ-01A-11D-A212-05	CESC	60	Cancer	0.812259	21937.7	0.46621	0.638737	148.588	0.173967	0.45764	0.7937		0.7035	0.8	0.7303
TCGA-ZJ-AAXU-01A-11D-A42P-05	CESC	51	Cancer	0.648402	15362.2	0.29134	0.490496	99.4146	0.178563	0.454031	0.8415			0.95	0.838
TCGA-C5-A1BE-01B-11D-A13Z-05	CESC	64	Cancer	0.632235	13854.8	0.265812	0.459054	121.724	0.178047	0.438516	0.9053		0.7107	0.6	0.6948
TCGA-EK-A3GN-01A-11D-A212-05	CESC	47	Cancer	0.720471	18661.8	0.367616	0.548477	142.613	0.343197	0.524085	0.985		0.7836	0.6	0.9432
TCGA-VS-A9UB-01A-22D-A42P-05	CESC	54	Cancer	0.579249	12956.7	0.254268	0.436979	133.222	0.24128	0.41903	0.7571			0.7	0.6913
TCGA-C5-A1M8-01A-21D-A13Z-05	CESC	43	Cancer	0.914847	22673.1	0.451853	0.630694	149.905	0.274909	0.433711	0.9468		0.9609	0.85	0.9383
TCGA-VS-A9UU-01A-11D-A42P-05	CESC	42	Cancer	0.61905	18245.9	0.35755	0.491868	121.382	0.127182	0.351179	0.9541			0.6	0.8698
TCGA-C5-A3HL-01A-11D-A212-05	CESC	76	Cancer	0.643134	10630.8	0.201098	0.480493	115.145	0.139544	0.370253	0.9337		0.7673	0.75	0.7614
TCGA-DS-A1OB-01A-11D-A14Z-05	CESC	45	Cancer	0.692558	14455.4	0.257201	0.421922	121.373	0.360564	0.556655	0.8806		0.6592	0.8	0.7913
TCGA-DG-A2KL-01A-11D-A17Z-05	CESC	53	Cancer	0.709566	14696.7	0.278609	0.465871	122.691	0.248353	0.508194	0.748		0.6959	0.7	0.6774
TCGA-EA-A556-01A-11D-A26S-05	CESC	38	Cancer	0.223162	1318.99	0.0505261	0.208245	93.8177	0.284034	0.386023	0.9119		0.8019	0.75	0.802
TCGA-VS-AA62-01A-11D-A42P-05	CESC	51	Cancer	0.483658	11637.8	0.210965	0.394129	124.2	0.14955	0.40736	0.7387			0.75	0.7235
TCGA-EK-A2PM-01A-11D-A18K-05	CESC	81	Cancer	0.699383	8920.52	0.168275	0.414201	122.663	0.322901	0.473315	0.9874		0.8745	0.96	0.9342
TCGA-IR-A3LF-01A-21D-A230-05	CESC	64	Cancer	0.784588	24360.3	0.532427	0.637656	131.983	0.0423409	0.169382	0.9028		0.9134	0.6	0.8784
TCGA-VS-A8EH-01A-11D-A36K-05	CESC	56	Cancer	0.791787	14382	0.259729	0.560596	100.495	0.192142	0.387518	0.9632		0.8792	0.85	0.8928
TCGA-MY-A5BF-01A-11D-A26S-05	CESC	68	Cancer	0.839964	18845.5	0.373155	0.57441	126.801	0.0826179	0.270509	0.8559		0.8269	0.8	0.8149
TCGA-MY-A5BF-11A-11D-A26S-05	CESC	68	Normal	0.139679	1292.29	0.0546266	0.163567	87.4548	0.0348533	0.182403
TCGA-DG-A2KK-01A-11D-A17Z-05	CESC	51	Cancer	0.806538	26834.4	0.561404	0.626716	137.749	0.10062	0.267075	0.9155		0.8039	0.7	0.8043
TCGA-C5-A2LX-01A-11D-A18K-05	CESC	54	Cancer	0.734702	20756.4	0.418822	0.574553	131.117	0.282116	0.565894	0.6987		0.6631	0.9	0.6388
TCGA-JW-A5VL-01A-11D-A28C-05	CESC	37	Cancer	0.839416	23294.1	0.43299	0.620874	154.888	0.416175	0.69886	0.8333		0.5911	0.9	0.7841
TCGA-DS-A0VM-01A-11D-A10W-05	CESC	51	Cancer	0.714987	19103.1	0.377954	0.533196	141.995	0.268177	0.514209	0.8582		0.7816	0.75	0.8179
TCGA-Q1-A73O-01A-11D-A32T-05	CESC	37	Cancer	0.630682	11362.9	0.195389	0.432919	97.7966	0.200537	0.422046	0.8637		0.6425	0.7	0.7913
TCGA-Q1-A5R1-01A-11D-A28C-05	CESC	32	Cancer	0.745375	24761.6	0.530006	0.63389	129.73	0.122792	0.366793	0.9463		0.8214	0.75	0.8806
TCGA-EA-A439-01A-11D-A244-05	CESC	50	Cancer	0.669103	15278.5	0.285533	0.473841	135.057	0.106018	0.294017	0.8604		0.8377	0.65	0.821
TCGA-LP-A7HU-01A-11D-A340-05	CESC	53	Cancer	0.854205	27412.8	0.580843	0.650451	138.941	0.137435	0.349746	0.8415		0.7606	0.65	0.7953
TCGA-C5-A8YT-01A-11D-A37Q-05	CESC	36	Cancer	0.153658	1320.21	0.0554681	0.208111	96.0068	0.0570387	0.2291	0.8446		0.8518	0.75	0.7995
TCGA-C5-A8YQ-01A-11D-A37Q-05	CESC	79	Cancer	0.859664	18941.8	0.329107	0.613299	130.753	0.328825	0.545299	0.9169		0.7803	0.9	0.836
TCGA-EK-A2R8-01A-21D-A18K-05	CESC	48	Cancer	0.61783	11909.1	0.221195	0.424053	126.068	0.184982	0.42529	0.9097		0.6178	0.65	0.6573
TCGA-DS-A0VK-01A-21D-A10W-05	CESC	45	Cancer	0.658638	15104.6	0.295304	0.450183	131.755	0.166853	0.413641	0.9238		0.7559	0.65	0.907
TCGA-EA-A44S-01A-12D-A26S-05	CESC	31	Cancer	0.713837	13422.3	0.228329	0.48704	104.695	0.276684	0.530092	0.8494		0.6389	0.7	0.7913
TCGA-JX-A5QV-01A-22D-A28C-05	CESC	37	Cancer	0.688081	12149.4	0.23351	0.481047	122.626	0.248971	0.489856	0.9031		0.6904	0.6	0.879
TCGA-VS-A9UY-01A-11D-A42P-05	CESC	29	Cancer	0.848658	24684.4	0.46948	0.643312	152.663	0.424055	0.668196	0.8797			0.8	0.7969
TCGA-LP-A4AU-01A-32D-A244-05	CESC	35	Cancer	0.47372	10568.9	0.193377	0.386529	118.559	0.10489	0.346244	0.8835		0.5186	0.8	0.7913
TCGA-JW-A5VJ-01A-11D-A28C-05	CESC	56	Cancer	0.603343	4207.59	0.104038	0.371987	96.4565	0.156572	0.308462	0.9328		0.6619	0.9	0.8806
TCGA-C5-A7XC-01A-11D-A388-05	CESC	26	Cancer	0.576886	11896	0.224764	0.442718	101.482	0.266869	0.553275	0.8113		0.6523	0.6	0.7542
TCGA-VS-A9V3-01A-11D-A42P-05	CESC	62	Cancer	0.801442	22575.3	0.455183	0.62287	148.365	0.202662	0.478915	0.8613			0.8	0.8067
TCGA-FU-A3HY-01A-11D-A21R-05	CESC	47	Cancer	0.734442	19933.1	0.370255	0.54974	130.33	0.306474	0.545245	0.97		0.6281	0.75	0.7913
TCGA-DS-A1OC-01A-11D-A14Z-05	CESC	47	Cancer	0.713439	15288.3	0.29099	0.505918	110.594	0.247024	0.40932	0.8765		0.7332	0.8	0.7913
TCGA-EK-A2RA-01A-11D-A18K-05	CESC	74	Cancer	0.748372	20878	0.419918	0.597564	147.423	0.483369	0.670882	0.8606		0.6769	0.65	0.6573
TCGA-EK-A2RN-01A-12D-A212-05	CESC	45	Cancer	0.72073	14898	0.267754	0.47887	107.75	0.311876	0.542141	0.8321		0.6202	0.98	0.7824
TCGA-JW-A5VK-01A-11D-A28C-05	CESC	43	Cancer	0.94814	25293.8	0.470457	0.68874	152.465	0.35521	0.613903	0.9695		0.879	0.9	0.8926
TCGA-FU-A3TQ-01A-11D-A230-05	CESC	55	Cancer	0.72084	18724.4	0.329405	0.551894	125.887	0.204684	0.484002	0.8694		0.6992	0.6	0.6813
TCGA-ZJ-AAXJ-01A-11D-A42P-05	CESC	43	Cancer	0.728266	19147.6	0.387397	0.536751	126.731	0.102774	0.217647	0.9298			0.6	0.8309
TCGA-C5-A1M7-01A-11D-A13Z-05	CESC	37	Cancer	0.562752	14303	0.259648	0.426805	111.482	0.241851	0.461876	0.863		0.4058	0.6	0.6126
TCGA-EA-A5ZF-01A-11D-A28C-05	CESC	56	Cancer	0.704719	12702	0.205119	0.448986	99.7246	0.210796	0.383763	0.9205		0.8636	0.9	0.8745
TCGA-C5-A7X8-01A-11D-A36K-05	CESC	35	Cancer	0.840394	16635.8	0.345118	0.624261	118.084	0.0679034	0.192306	0.8011		0.9431	0.8	0.836
TCGA-C5-A2LZ-01A-11D-A212-05	CESC	65	Cancer	0.722489	18824.6	0.364056	0.579672	140.743	0.253721	0.522797	0.9065		0.6723	0.65	0.6573
TCGA-C5-A7UC-01A-11D-A357-05	CESC	48	Cancer	0.662998	14939.6	0.262671	0.49446	136.34	0.159491	0.460642	0.9602		0.7001	0.95	0.6823
TCGA-EK-A2RE-01A-11D-A18K-05	CESC	26	Cancer	0.722919	11859.6	0.183385	0.459041	138.113	0.26073	0.547819	0.9559		0.7649	0.7	0.7585
TCGA-C5-A1MQ-01A-11D-A14Z-05	CESC	35	Cancer	0.660848	18199.6	0.37194	0.508319	127.031	0.111562	0.371343	0.6851		0.7285	0.9	0.7157
TCGA-EA-A78R-01A-11D-A32T-05	CESC	54	Cancer	0.659949	16522.5	0.320278	0.485991	115.891	0.125755	0.323247	0.8194		0.6135	0.6	0.7653
TCGA-VS-A8QH-01A-11D-A37Q-05	CESC	76	Cancer	0.676784	15321.1	0.311752	0.463713	109.643	0.210242	0.456776	0.9591		0.6471	0.9	0.6201
TCGA-UC-A7PD-01A-11D-A357-05	CESC	21	Cancer	0.596518	11003.1	0.204536	0.467783	110.284	0.117865	0.383856	0.9282		0.6885	0.85	0.6687
TCGA-C5-A1ML-01A-11D-A14Z-05	CESC	49	Cancer	0.790596	9233.63	0.163044	0.4954	118.108	0.152598	0.385006	0.9034		0.8133	0.9	0.8794
TCGA-LP-A4AV-01A-11D-A244-05	CESC	63	Cancer	0.665773	13948.2	0.257898	0.471833	138.454	0.277763	0.487749	0.7249		0.7145	0.8	0.6992
TCGA-MY-A5BE-01A-21D-A26S-05	CESC	42	Cancer	0.519425	15027.9	0.290268	0.467617	116.407	0.0838207	0.31642	0.515		0.4374	0.8	0.3736
TCGA-C5-A1MK-01A-11D-A14Z-05	CESC	79	Cancer	0.618319	14856.8	0.292736	0.480407	130.868	0.246202	0.488357	0.8156		0.6067	0.8	0.76
TCGA-VS-A9UQ-01A-21D-A42P-05	CESC	32	Cancer	0.680512	20429.9	0.429517	0.558388	131.411	0.0786071	0.278507	0.9207			0.7	0.8471
TCGA-C5-A7CK-01A-11D-A32T-05	CESC	58	Cancer	0.754188	19227.3	0.398311	0.547026	132.125	0.183386	0.342886	0.9349		0.8208	0.6	0.8241
TCGA-ZJ-AAX8-01A-11D-A42P-05	CESC	58	Cancer	0.495548	10648.2	0.198593	0.40203	122.947	0.112892	0.341122	0.7279			0.7	0.6492
TCGA-VS-A8Q8-01A-11D-A37Q-05	CESC	26	Cancer	0.669612	9811.59	0.173103	0.466805	101.877	0.230342	0.503025	0.8266		0.709	0.7	0.775
TCGA-DG-A2KJ-01A-11D-A18K-05	CESC	50	Cancer	0.618554	12472.9	0.274905	0.479744	120.023	0.108013	0.374748	0.7749		0.7103	0.8	0.7049
TCGA-EK-A2GZ-01A-11D-A17Z-05	CESC	64	Cancer	0.586676	12333.2	0.243284	0.424913	95.5787	0.167312	0.341944	0.9341		0.5918	0.98	0.9211
TCGA-LP-A4AW-01A-11D-A244-05	CESC	52	Cancer	0.510061	14883.5	0.281685	0.38341	118.974	0.150096	0.40588	0.8351		0.5913	0.8	0.7866
TCGA-C5-A1M9-01A-11D-A13Z-05	CESC	46	Cancer	0.842564	25948	0.547639	0.648617	130.704	0.107842	0.343231	0.9458		0.9122	0.85	0.9316
TCGA-EA-A5O9-01A-11D-A28C-05	CESC	39	Cancer	0.858651	19972.7	0.376886	0.636381	145.822	0.254472	0.528016	0.9206		0.8647	0.9	0.8757
TCGA-HM-A6W2-01A-21D-A340-05	CESC	34	Cancer	0.696803	6197.56	0.164977	0.38148	123.15	0.248845	0.384001	0.8837		0.769	0.8
TCGA-VS-A8EL-01A-11D-A37Q-05	CESC	38	Cancer	0.641635	19169.4	0.360524	0.518164	123.428	0.18958	0.403194	0.7233		0.5777	0.8	0.6348
TCGA-FU-A2QG-01A-11D-A18K-05	CESC	29	Cancer	0.728572	13779.2	0.277977	0.536713	130.333	0.301295	0.632491	0.9496		0.5626	0.7	0.7019
TCGA-ZJ-A8QO-01A-11D-A37Q-05	CESC	73	Cancer	0.739857	18536.8	0.362026	0.556478	139.787	0.205371	0.435123	0.753		0.7071	0.8	0.6906
TCGA-EK-A2PL-01A-11D-A18K-05	CESC	36	Cancer	0.782448	17194.5	0.315543	0.551775	117.234	0.324333	0.547974	0.942		0.6109	0.8	0.7913
TCGA-DG-A2KH-01A-21D-A230-05	CESC	25	Cancer	0.795145	13922.2	0.276175	0.529146	105.726	0.0847223	0.275887	0.9927		0.8857	0.8	0.9005
TCGA-ZJ-AAXF-01A-31D-A42P-05	CESC	62	Cancer	0.521089	13224.9	0.24082	0.430439	100.243	0.153398	0.378967	0.755			0.8	0.6452
TCGA-UC-A7PF-01A-11D-A357-05	CESC	44	Cancer	0.610148	14905.3	0.281483	0.467479	120.323	0.140728	0.388153	0.7334		0.6511	0.6	0.6484
TCGA-EK-A3GM-01A-11D-A212-05	CESC	65	Cancer	0.804481	14400.3	0.29491	0.549766	104.466	0.044244	0.177857	0.975		0.8983	0.97	0.9342
TCGA-HM-A3JJ-11A-12D-A21R-05	CESC	40	Normal	0.0876135	307.948	0.0384288	0.109013	86.269	0.0459361	0.182486
TCGA-HM-A3JJ-01A-21D-A21R-05	CESC	40	Cancer	0.59868	16550	0.302615	0.452303	127.303	0.196493	0.458192	0.7819		0.6134	0.6	0.7144
TCGA-EK-A2H1-01A-11D-A17Z-05	CESC	20	Cancer	0.402802	6246.31	0.121529	0.319097	100.121	0.100567	0.345459	0.7654		0.5772	0.7	0.6919
TCGA-Q1-A73Q-01A-21D-A32T-05	CESC	46	Cancer	0.855669	19899.6	0.388362	0.604539	140.189	0.182883	0.366593	0.9532		0.8377	0.7	0.844
TCGA-C5-A1BF-01B-11D-A13Z-05	CESC	46	Cancer	0.671053	7724.55	0.181989	0.46632	92.5081	0.116449	0.322282	0.8071		0.7007	0.7	0.7019
TCGA-C5-A7CJ-01A-11D-A32T-05	CESC	42	Cancer	0.62737	13798.9	0.281871	0.468467	104.831	0.163979	0.383316	0.7322		0.6267	0.65	0.6469
TCGA-C5-A7CL-01A-11D-A32T-05	CESC	48	Cancer	0.663327	15142.8	0.275793	0.480587	126.919	0.202064	0.397727	0.8857		0.7185	0.75	0.7913
TCGA-FU-A23L-01A-11D-A16P-05	CESC	60	Cancer	0.573899	6547.35	0.152051	0.394626	97.2062	0.182663	0.35728	0.8349		0.6527	0.9	0.7863
TCGA-ZJ-A8QQ-01A-11D-A37Q-05	CESC	24	Cancer	0.739291	20176.5	0.393357	0.559293	131.903	0.148223	0.365954	0.9355		0.7467	0.8	0.7371
TCGA-EX-A69M-01A-11D-A32T-05	CESC	62	Cancer	0.776821	20018.9	0.393208	0.581843	122.77	0.12273	0.32761	0.8339		0.7877	0.75	0.785
TCGA-VS-A9V2-01A-11D-A42P-05	CESC	29	Cancer	0.632511	16782.2	0.346619	0.495277	127.771	0.232158	0.540746	0.8276			0.8	0.7838
TCGA-VS-A9UM-01A-11D-A42P-05	CESC	39	Cancer	0.74633	16761.4	0.292875	0.513932	133.769	0.336148	0.65913	0.7779			0.75	0.6607
TCGA-JW-A5VG-01A-11D-A28C-05	CESC	35	Cancer	0.728076	15552.1	0.268414	0.535087	136.926	0.17048	0.43082	0.8808		0.6125	0.95	0.8486
TCGA-C5-A8XH-01A-11D-A37Q-05	CESC	39	Cancer	0.719123	15172.6	0.304823	0.513709	132.056	0.132107	0.35661	0.8596		0.7269	0.8	0.7913
TCGA-VS-A953-01A-11D-A388-05	CESC	63	Cancer	0.931773	29247.7	0.52579	0.732026	152.755	0.226583	0.44128	0.9414		0.8762	0.8	0.8893
TCGA-Q1-A73P-01A-11D-A32T-05	CESC	45	Cancer	0.798323	22864.4	0.501347	0.632022	123.038	0.048937	0.205218	0.8995		0.8493	0.7	0.8577
TCGA-C5-A7CO-01A-11D-A357-05	CESC	68	Cancer	0.705709	18159	0.346771	0.516418	118.354	0.283327	0.499955	0.9331		0.7796	0.75	0.7757
TCGA-UC-A7PG-06A-11D-A42P-05	CESC	44	Cancer	0.705373	13124.9	0.25694	0.478332	122.711	0.398887	0.66776	0.8179			0.8	0.7773
TCGA-BI-A20A-01A-11D-A14Z-05	CESC	49	Cancer	0.64577	16036.9	0.309427	0.516847	129.391	0.268844	0.497739	0.8095		0.7507	0.7	0.7419
TCGA-VS-A9UV-01A-11D-A42P-05	CESC	74	Cancer	0.907638	26715	0.540013	0.713513	144.035	0.166938	0.396772	0.9512			0.7	0.8678
TCGA-HG-A9SC-01A-21D-A42P-05	CESC	49	Cancer	0.68257	15208.6	0.240828	0.405089	98.8625	0.264181	0.449039				0.7
TCGA-MU-A51Y-01A-11D-A26S-05	CESC	27	Cancer	0.603356	14871.6	0.269404	0.485507	123.285	0.0698948	0.267	0.7182		0.6443	0.8	0.6278
TCGA-RA-A741-01A-11D-A340-05	CESC	34	Cancer	0.605067	14889.4	0.253082	0.461685	128.89	0.164238	0.46433	0.8077		0.6568	0.85	0.7494
TCGA-C5-A1BQ-01C-11D-A212-05	CESC	65	Cancer	0.684946	17014.4	0.317333	0.486575	135.5	0.165282	0.449983	0.8333		0.6524	0.9	0.7841
TCGA-C5-A1BK-01B-11D-A13Z-05	CESC	36	Cancer	0.574271	16996.6	0.350629	0.462569	123.463	0.132649	0.416053	0.7137		0.5288	0.7	0.6217
TCGA-C5-A1BJ-01A-11D-A13Z-05	CESC	34	Cancer	0.509785	13857.6	0.269306	0.387067	118.403	0.118451	0.376243	0.8207		0.5249	0.8	0.7671
TCGA-EK-A2IR-01A-11D-A17Z-05	CESC	48	Cancer	0.916675	19448	0.352331	0.604114	123.407	0.301568	0.414933	0.9905		0.9649	0.9	0.9935
TCGA-VS-A9UD-01A-11D-A42P-05	CESC	73	Cancer	0.766546	17340.1	0.322507	0.569612	137.017	0.190888	0.460706	0.7549			0.8	0.7791
TCGA-C5-A8XJ-01A-11D-A37Q-05	CESC	74	Cancer	0.767165	17648.6	0.318561	0.532069	99.7579	0.177921	0.393595	0.8639		0.8393	0.7	0.8257
TCGA-JX-A3Q8-01A-11D-A21R-05	CESC	40	Cancer	0.874777	28041.9	0.591116	0.684212	152.274	0.217268	0.438892	0.901		0.8762	0.9	0.876
TCGA-UC-A7PI-01A-11D-A42P-05	CESC	44	Cancer	0.880276	22621.2	0.470799	0.636862	147.351	0.0701982	0.209071	0.9671			0.65	0.8785
TCGA-C5-A2LY-01A-31D-A18K-05	CESC	30	Cancer	0.639761	14013.5	0.260704	0.462949	126.592	0.178512	0.463279	0.7351		0.6834	0.8	0.6627
TCGA-4J-AA1J-01A-21D-A388-05	CESC	31	Cancer	0.767805	18084.4	0.318953	0.512122	105.395	0.323808	0.558983	0.9101		0.6553	0.7	0.7913
TCGA-VS-A94Z-01A-11D-A388-05	CESC	38	Cancer	0.54561	13926.9	0.26705	0.407931	126.359	0.197696	0.454267	0.6958		0.3891	0.8	0.5975
TCGA-EA-A3HR-01A-11D-A212-05	CESC	57	Cancer	0.727918	15408.4	0.278261	0.52633	137.434	0.206347	0.47432	0.9225		0.7908	0.75	0.7889
TCGA-EA-A5ZD-01A-11D-A28C-05	CESC	40	Cancer	0.508052	12044.1	0.209719	0.374233	124.297	0.196299	0.446516	0.7966		0.4773	0.6	0.7343
TCGA-C5-A7UE-01A-11D-A340-05	CESC	45	Cancer	0.660078	17460.1	0.335802	0.517008	122.675	0.177174	0.418721	0.9448		0.703	0.95	0.7019
TCGA-DS-A0VN-01A-21D-A10W-05	CESC	47	Cancer	0.636881	14678	0.284565	0.479103	121.979	0.30712	0.555156	0.6806		0.5838	0.55	0.5767
TCGA-C5-A902-01A-11D-A37Q-05	CESC	35	Cancer	0.822156	19442.7	0.36724	0.566729	127.136	0.126114	0.314193	0.8685		0.8329	0.8	0.8319
TCGA-ZJ-AB0H-01A-11D-A42P-05	CESC	48	Cancer	0.643433	15412.3	0.299982	0.485599	103.271	0.198123	0.500685	0.7472			0.95	0.7516
TCGA-MA-AA3X-01A-22D-A42P-05	CESC	50	Cancer	0.732472	12888.9	0.220906	0.434691	121.116	0.450366	0.667198	0.7854			0.8	0.7105
TCGA-C5-A901-01A-11D-A37Q-05	CESC	44	Cancer	0.739407	19908.8	0.403871	0.569933	138.97	0.101579	0.361572	0.8789		0.7789	0.7	0.836
TCGA-VS-A8QC-01A-11D-A37Q-05	CESC	51	Cancer	0.832739	25877.7	0.480853	0.637498	141.181	0.256316	0.456737	0.8814		0.7485	0.7	0.7392
TCGA-DS-A7WI-01A-12D-A357-05	CESC	43	Cancer	0.791524	17709.9	0.313891	0.561442	147.638	0.185389	0.407674	0.9134		0.7731	0.8	0.893
TCGA-Q1-A6DV-01A-11D-A32T-05	CESC	36	Cancer	0.751524	17442.1	0.372495	0.536502	125.466	0.123576	0.297373	0.9659		0.7418	0.6	0.7314
TCGA-DS-A3LQ-01A-21D-A21R-05	CESC	46	Cancer	0.739402	17897	0.346902	0.531118	132.679	0.223084	0.402789	0.8394		0.7779	0.75	0.7925
TCGA-C5-A2M1-01A-11D-A18K-05	CESC	37	Cancer	0.72099	23867	0.496554	0.590429	138.04	0.154665	0.419438	0.876		0.7457	0.7	0.7359
TCGA-BI-A0VS-01A-11D-A10W-05	CESC	48	Cancer	0.637262	12602.2	0.219777	0.428121	120.419	0.311123	0.508519	0.8462		0.5904	0.725	0.6126
TCGA-ZJ-AB0I-01A-11D-A42P-05	CESC	25	Cancer	0.789814	9891.21	0.174824	0.449823	113.558	0.435171	0.641239	0.9006			0.95	0.7887
TCGA-LP-A4AX-01A-12D-A244-05	CESC	45	Cancer	0.539423	13063.2	0.258809	0.448389	119.447	0.114104	0.352416	0.7282		0.5504	0.8	0.6414
TCGA-DS-A1O9-01A-11D-A14Z-05	CESC	75	Cancer	0.60942	15963.9	0.335693	0.420664	111.16	0.202955	0.36546	0.7224		0.555	0.7	0.6336
TCGA-EX-A1H5-01A-31D-A13Z-05	CESC	58	Cancer	0.792748	17482.9	0.33503	0.57678	146.066	0.168449	0.432604	0.9453		0.8744	0.6	0.8871
TCGA-EA-A5FO-01A-21D-A28C-05	CESC	59	Cancer	0.941563	29855.9	0.675053	0.758407	143.594	0.156271	0.441535	0.9915		0.8918	0.6	0.9076
TCGA-C5-A8ZZ-01A-11D-A37Q-05	CESC	41	Cancer	0.701334	10479.3	0.213934	0.486119	106.006	0.239134	0.470803	0.8624		0.7742	0.7	0.7913
TCGA-C5-A2M2-01A-21D-A18K-05	CESC	56	Cancer	0.907681	31094.9	0.669821	0.764059	145.59	0.0949002	0.253918	0.9742		0.8913	0.75	0.907
TCGA-VS-A9UJ-01A-11D-A42P-05	CESC	55	Cancer	0.698128	10447.3	0.224314	0.456494	125.258	0.27866	0.479992	0.9858			0.8	0.8912
TCGA-C5-A1MP-01A-11D-A14Z-05	CESC	34	Cancer	0.611439	12015.1	0.220682	0.450161	126.129	0.161423	0.394547	0.6595		0.5996	0.85	0.5643
TCGA-MA-AA41-01A-11D-A388-05	CESC	33	Cancer	0.739706	21630.5	0.409197	0.550047	129.922	0.170743	0.440761	0.9241		0.723	0.75	0.7092
TCGA-C5-A1MF-01A-11D-A13Z-05	CESC	49	Cancer	0.789214	19038.1	0.396181	0.536312	125.187	0.096658	0.31564	0.8307		0.7605	0.8	0.7806
TCGA-C5-A2LV-01A-11D-A18K-05	CESC	36	Cancer	0.782956	20993.4	0.403562	0.576055	141.748	0.31351	0.537393	0.8248		0.7856	0.85	0.7829
TCGA-FU-A3YQ-01A-11D-A230-05	CESC	35	Cancer	0.565722	16867	0.31165	0.463961	120.145	0.187594	0.441624	0.7135		0.5137	0.6	0.6126
TCGA-DS-A7WH-01A-22D-A357-05	CESC	34	Cancer	0.634111	17952.6	0.393242	0.466454	129.524	0.121291	0.340942	0.8581		0.7545	0.6	0.7466
TCGA-C5-A1MN-01A-11D-A14Z-05	CESC	42	Cancer	0.726533	20359.2	0.404835	0.549364	134.63	0.326103	0.561101	0.9354		0.7491	0.85	0.836
TCGA-MA-AA42-01A-12D-A388-05	CESC	75	Cancer	0.676232	20694.4	0.381956	0.518471	140.42	0.277319	0.487614	0.6233		0.602	0.75	0.5671
TCGA-VS-A8EI-01A-11D-A37Q-05	CESC	38	Cancer	0.591841	16399.8	0.31023	0.467263	128.66	0.183747	0.475391	0.84		0.5678	0.6	0.7019
TCGA-VS-A954-01A-11D-A388-05	CESC	67	Cancer	0.801828	20787.5	0.412673	0.610158	138.943	0.126772	0.3966	0.9		0.8409	0.9	0.8477
TCGA-VS-A94X-01A-11D-A388-05	CESC	40	Cancer	0.651727	9984.29	0.178562	0.422019	102.796	0.252308	0.447782	0.9396		0.6282	0.7	0.6126
TCGA-EX-A69L-01A-11D-A32T-05	CESC	41	Cancer	0.691311	15184.2	0.289566	0.512387	137.387	0.191794	0.440065	0.7161		0.538	0.7	0.6249
TCGA-Q1-A73R-01A-11D-A340-05	CESC	45	Cancer	0.900593	27854.1	0.621646	0.70557	138.205	0.139185	0.3258	0.9495		0.8715	0.6	0.8838
TCGA-Q1-A5R3-01A-11D-A28C-05	CESC	56	Cancer	0.755661	14944.1	0.255899	0.508761	124.947	0.220695	0.469847	0.8815		0.6336	0.8	0.6126
TCGA-C5-A7UH-01A-11D-A357-05	CESC	55	Cancer	0.709022	14255.9	0.257816	0.474017	124.815	0.437353	0.6883	0.8874		0.3494	0.95	0.6126
TCGA-VS-A8QA-01A-11D-A37Q-05	CESC	44	Cancer	0.861876	26354.4	0.592545	0.715475	128.22	0.081623	0.241365	0.9665		0.8672	0.7	0.8787
TCGA-DS-A1OD-01A-11D-A14Z-05	CESC	49	Cancer	0.614446	15601.1	0.293926	0.47076	132.6	0.19598	0.487228	0.6727		0.5801	0.8	0.566
TCGA-FU-A57G-01A-11D-A26S-05	CESC	49	Cancer	0.583675	5297.53	0.137224	0.351518	113.42	0.105848	0.254776	0.8441		0.8272	0.75	0.7988
TCGA-VS-A8Q9-01A-12D-A37Q-05	CESC	79	Cancer	0.722453	17608.6	0.334197	0.578289	139.226	0.257072	0.491266	0.9497		0.7557	0.8	0.7477
TCGA-Q1-A73S-01A-11D-A340-05	CESC	33	Cancer	0.587804	2301.37	0.0813351	0.372909	98.1716	0.471696	0.696004	0.9754		0.8314	0.8	0.8366
TCGA-ZJ-A8QR-01A-11D-A37Q-05	CESC	38	Cancer	0.790813	17932.8	0.323889	0.568773	136.827	0.398161	0.575518	0.9299		0.6225	0.8	0.7019
TCGA-EK-A3GK-01A-11D-A212-05	CESC	33	Cancer	0.772296	17576.9	0.322742	0.595432	135.381	0.28777	0.521128	0.9572		0.8472	0.96	0.9038
TCGA-ZJ-AAXD-01A-21D-A42P-05	CESC	35	Cancer	0.677012	13918.6	0.249988	0.493554	108.472	0.143135	0.425227	0.894			0.7	0.8289
TCGA-EA-A97N-01A-11D-A388-05	CESC	38	Cancer	0.63774	12338.1	0.233598	0.432661	102.806	0.185559	0.484197	0.8707		0.6646	0.6	0.6407
TCGA-C5-A1M5-01A-11D-A13Z-05	CESC	53	Cancer	0.779048	19952.4	0.385666	0.612915	144.218	0.323248	0.605679	0.8489		0.7155	0.9	0.8054
TCGA-LP-A5U2-01A-11D-A28C-05	CESC	30	Cancer	0.872788	22892.4	0.423162	0.632534	133.433	0.0854556	0.265312	0.9423		0.8177	0.8	0.8806
TCGA-EA-A3QE-01A-21D-A21R-05	CESC	45	Cancer	0.590726	16128.5	0.312211	0.469545	120.164	0.190436	0.44892	0.7391		0.4988	0.8	0.6562
TCGA-DG-A2KM-01A-11D-A17Z-05	CESC	46	Cancer	0.413242	10091.6	0.191956	0.375041	111.868	0.186145	0.466779	0.4043		0.3411	0.9	0.2605
TCGA-C5-A7CG-01A-11D-A32T-05	CESC	55	Cancer	0.724531	20617.9	0.429099	0.588611	135.344	0.150205	0.393556	0.664		0.6132	0.75	0.5802
TCGA-VS-A9U6-01A-11D-A42P-05	CESC	52	Cancer	0.666752	14411.7	0.289021	0.48866	106.229	0.155975	0.399815	0.8594			0.8	0.8054
TCGA-UC-A7PG-01A-11D-A42P-05	CESC	44	Cancer	0.651187	13540.2	0.258384	0.479856	123.536	0.253733	0.55922	0.907			0.6
TCGA-ZX-AA5X-01A-11D-A42P-05	CESC	64	Cancer	0.519183	14254.4	0.286144	0.400768	116.658	0.0982633	0.287164	0.6801			0.6	0.6837
TCGA-DS-A5RQ-01A-11D-A28C-05	CESC	80	Cancer	0.705293	14918.4	0.277987	0.510532	108.331	0.198026	0.47068	0.8641		0.6855	0.75	0.7913
TCGA-IR-A3L7-01A-21D-A212-05	CESC	37	Cancer	0.818739	23018.1	0.446817	0.588197	134.512	0.216913	0.480113	0.9646		0.8362	0.6	0.8422
TCGA-ZJ-AAXA-01A-11D-A42P-05	CESC	64	Cancer	0.615733	6318.43	0.151574	0.390085	106.656	0.384097	0.758415	0.9301			0.9	0.7641
TCGA-VS-A9V1-01A-11D-A42P-05	CESC	46	Cancer	0.644782	14176.7	0.297103	0.477885	120.138	0.11536	0.320192	0.95			0.6	0.8223
TCGA-ZJ-AAX4-01A-11D-A42P-05	CESC	85	Cancer	0.798516	18234.9	0.348988	0.593423	136.741	0.151231	0.425815	0.7676			0.7	0.6538
TCGA-MA-AA43-01A-11D-A42P-05	CESC	48	Cancer	0.68138	16866.7	0.352359	0.517491	129.686	0.0941039	0.266901	0.8786			0.8	0.8185
TCGA-EA-A50E-01A-21D-A26S-05	CESC	45	Cancer	0.634543	19404.6	0.395235	0.51816	131.355	0.184063	0.380812	0.7791		0.6441	0.6	0.7106
TCGA-FU-A3WB-01A-11D-A230-05	CESC	43	Cancer	0.883182	19286.4	0.378875	0.635381	135.948	0.122663	0.351241	0.951		0.9784	0.75	0.9439
TCGA-Q1-A6DT-01A-11D-A32T-05	CESC	55	Cancer	0.734224	18684	0.361934	0.528295	138.399	0.272135	0.472191	0.9398		0.7197	0.8	0.7054
TCGA-ZJ-AAXN-01A-11D-A42P-05	CESC	34	Cancer	0.680265	9271.83	0.157808	0.474905	105.707	0.207605	0.382151	0.8519			0.95	0.7556
TCGA-C5-A7CM-01A-11D-A340-05	CESC	35	Cancer	0.728495	19039.7	0.358028	0.586448	133.736	0.1173	0.326511	0.9379		0.7721	0.75	0.767
TCGA-EX-A1H6-01B-11D-A230-05	CESC	38	Cancer	0.688826	17614.7	0.386857	0.538788	127.522	0.0749904	0.238855	0.9355		0.9066	0.8	0.9229
TCGA-EA-A3HU-01A-11D-A212-05	CESC	43	Cancer	0.576312	13519	0.243363	0.439973	101.194	0.166674	0.386924	0.7091		0.5242	0.95	0.6155
TCGA-VS-A9UP-01A-11D-A42P-05	CESC	43	Cancer	0.661993	11544.6	0.214382	0.439618	114.366	0.137464	0.29202	0.9856			0.7	0.9358
TCGA-C5-A1BI-01B-11D-A13Z-05	CESC	31	Cancer	0.472841	9834.38	0.185364	0.342583	99.877	0.222702	0.456268	0.7599		0.4431	0.9	0.6845
TCGA-C5-A8XK-01A-11D-A37Q-05	CESC	30	Cancer	0.747642	17641.1	0.313851	0.521424	135.196	0.320606	0.520002	0.9216		0.655	0.85	0.7913
TCGA-FU-A5XV-01A-11D-A28C-05	CESC	32	Cancer	0.715433	15861.7	0.305738	0.507742	107.467	0.311988	0.556794	0.9222		0.6217	0.9	0.6126
TCGA-EA-A3HS-01A-11D-A212-05	CESC	35	Cancer	0.822896	18608.7	0.323709	0.560111	100.07	0.190512	0.486848	0.8793		0.8723	0.9	0.8806
TCGA-HM-A4S6-01A-11D-A26S-05	CESC	51	Cancer	0.647066	13773	0.257949	0.450042	130.971	0.264786	0.52148	0.758		0.5352	0.75	0.6126
TCGA-C5-A905-01A-11D-A37Q-05	CESC	37	Cancer	0.94837	21727.4	0.355492	0.556228	124.708	0.374667	0.713581	0.9631		0.2984	0.75	0.836
TCGA-VS-A952-01A-11D-A388-05	CESC	66	Cancer	0.876226	29749.4	0.619836	0.742197	136.025	0.16167	0.43508	0.9677		0.9117	0.7	0.931
TCGA-EK-A2RC-01A-11D-A18K-05	CESC	33	Cancer	0.656112	18018.1	0.336622	0.519898	126.372	0.248711	0.51186	0.7857		0.6873	0.92	0.7195
TCGA-C5-A1M6-01A-11D-A13Z-05	CESC	55	Cancer	0.764657	16758.3	0.314922	0.504194	104.612	0.106122	0.291735	0.973		0.8318	0.95	0.9253
TCGA-EA-A6QX-01A-12D-A340-05	CESC	49	Cancer	0.778773	22442.3	0.429129	0.597702	151.228	0.271885	0.544987	0.8595		0.6964	0.8	0.7019
TCGA-HG-A2PA-01A-11D-A212-05	CESC	38	Cancer	0.566141	14701.8	0.276071	0.412376	113.562	0.107483	0.301576	0.8595		0.7413	0.9	0.7307
TCGA-VS-A9UT-01A-11D-A42P-05	CESC	72	Cancer	0.339288	1155.97	0.0545236	0.209306	93.37	0.110309	0.311678	0.6021			0.8	0.5414
TCGA-VS-A8EG-01A-11D-A36K-05	CESC	36	Cancer	0.862011	21194.6	0.392169	0.641825	138.622	0.161477	0.420643	0.9579		0.798	0.8	0.7974
TCGA-VS-A8EB-01A-11D-A36K-05	CESC	41	Cancer	0.879852	20505.6	0.359657	0.622907	139.215	0.158997	0.399459	0.8856		0.8726	0.8	0.8551
TCGA-FU-A770-01A-11D-A340-05	CESC	33	Cancer	0.641616	16962.5	0.354502	0.459607	117.862	0.0502112	0.155266	0.9434		0.6504	0.8	0.624
TCGA-C5-A907-01A-11D-A37Q-05	CESC	47	Cancer	0.670854	11707.7	0.256856	0.459362	127.602	0.200117	0.384035	0.8817		0.6701	0.7	0.8499
TCGA-JW-A5VI-01A-11D-A28C-05	CESC	45	Cancer	0.680982	19188.9	0.329694	0.497133	136.404	0.134917	0.409745	0.8328		0.6398	0.9	0.7019
TCGA-IR-A3LK-01A-12D-A212-05	CESC	69	Cancer	0.823488	20380.9	0.379168	0.58648	104.219	0.350759	0.697412	0.9007		0.6216	0.9	0.8756
TCGA-MU-A8JM-01A-11D-A36K-05	CESC	46	Cancer	0.715853	17622.8	0.315559	0.513869	127.401	0.148641	0.364747	0.8739		0.7164	0.7	0.7015
TCGA-EK-A2H0-01A-11D-A17Z-05	CESC	24	Cancer	0.716717	20516.8	0.401855	0.554923	131.854	0.159189	0.383095	0.9453		0.7433	0.94	0.9164
TCGA-ZJ-AAXT-01A-11D-A42P-05	CESC	54	Cancer	0.622031	9366.53	0.158997	0.438386	103.218	0.262154	0.440438	0.917			0.9	0.7998
TCGA-EA-A43B-01A-81D-A244-05	CESC	43	Cancer	0.590482	17310.4	0.329727	0.492088	122.68	0.196016	0.444128	0.8035		0.5588	0.7	0.7437
TCGA-EA-A1QT-01A-11D-A14Z-05	CESC	47	Cancer	0.855116	22570.7	0.429293	0.600961	143.822	0.468287	0.68953	0.9188		0.4762	0.7	0.7019
TCGA-IR-A3LB-01A-11D-A244-05	CESC	53	Cancer	0.704493	19887.9	0.424332	0.541866	129.594	0.0614659	0.245066	0.8416		0.901	0.9	0.7955
TCGA-C5-A3HF-01A-11D-A212-05	CESC	24	Cancer	0.539355	12891	0.270466	0.433102	114.754	0.0674848	0.284916	0.8761		0.7106	0.65	0.6946
TCGA-EK-A2RL-01A-11D-A18K-05	CESC	32	Cancer	0.889361	27720.9	0.603203	0.735834	153.081	0.0992026	0.28885	0.9655		0.9434	0.7	0.9637
TCGA-C5-A1MH-01A-11D-A14Z-05	CESC	71	Cancer	0.529002	14921.6	0.286104	0.413362	121.602	0.219128	0.466748	0.6998		0.4817	0.6	0.6028
TCGA-VS-A8EC-01A-11D-A36K-05	CESC	55	Cancer	0.909706	21353.1	0.452064	0.686994	141.583	0.435532	0.60705	0.9982		0.8584	0.8	0.9253
TCGA-VS-A9UO-01A-11D-A42P-05	CESC	43	Cancer	0.769544	18061	0.398228	0.552812	124.679	0.0749415	0.182444	0.9849			0.7	0.8459
TCGA-VS-A9UZ-01A-11D-A42P-05	CESC	61	Cancer	0.706927	21280.8	0.46979	0.571423	121.159	0.0769263	0.215279	0.9245			0.6	0.8049
TCGA-VS-A94W-01A-12D-A37Q-05	CESC	39	Cancer	0.672978	14714.5	0.290175	0.494215	123.152	0.218721	0.501009	0.7744		0.6799	0.8	0.7019
TCGA-EK-A2RD-01A-12D-A212-05	CESC	47	Cancer	0.652032	16296.5	0.315186	0.515131	104.629	0.219345	0.500642			0.5945	0.85	0.6971
TCGA-EX-A8YF-01A-11D-A37Q-05	CESC	44	Cancer	0.665197	10608.5	0.207052	0.505604	102.512	0.127387	0.37912	0.8438		0.6554	0.8	0.6298
TCGA-EA-A4BA-01A-21D-A26S-05	CESC	49	Cancer	0.708978	7570.08	0.163323	0.43261	123.099	0.223013	0.401734	0.9561		0.9366	0.6	0.9509
TCGA-C5-A8XI-01A-11D-A37Q-05	CESC	69	Cancer	0.771825	21872	0.428022	0.612365	110.176	0.0706939	0.303415	0.8828		0.7713	0.85	0.7913
TCGA-XS-A8TJ-01A-11D-A36K-05	CESC	41	Cancer	0.634147	16236.6	0.308137	0.47234	129.513	0.196463	0.450149	0.8558		0.5671	0.7	0.7019
TCGA-DS-A0VL-01A-21D-A10W-05	CESC	25	Cancer	0.691816	16313.7	0.31209	0.525988	138.375	0.155199	0.442041	0.8885		0.721	0.75	0.8591
TCGA-EK-A2PG-01A-11D-A18K-05	CESC	88	Cancer	0.852441	23019	0.448168	0.646859	144.949	0.343757	0.676395	0.9763		0.7666	0.6	0.7605
TCGA-EX-A3L1-01A-11D-A21R-05	CESC	32	Cancer	0.467313	10028.8	0.177571	0.337427	109.4	0.0729905	0.236526	0.8307		0.4427	0.6	0.7806
TCGA-FU-A40J-01A-11D-A244-05	CESC	38	Cancer	0.722198	21902.7	0.470035	0.597717	143.277	0.231198	0.400751	0.8809		0.7711	0.75	0.7658
TCGA-C5-A7CH-01A-11D-A340-05	CESC	43	Cancer	0.76107	19709.6	0.379886	0.583116	137.163	0.241006	0.547158	0.9178		0.7504	0.8	0.7414
TCGA-EK-A2R9-01A-11D-A18K-05	CESC	58	Cancer	0.792525	20859.5	0.404543	0.603923	110.963	0.108348	0.392785	0.7735		0.7565	0.65	0.7029
TCGA-IR-A3LH-01A-21D-A212-05	CESC	49	Cancer	0.60184	15822.2	0.324527	0.456875	120.671	0.154207	0.419428	0.5391		0.6035	0.95	0.5688
TCGA-EK-A2RO-01A-11D-A18K-05	CESC	59	Cancer	0.717484	17661.9	0.330472	0.525116	138.975	0.13082	0.366086	0.8676		0.8662	0.65	0.8307
TCGA-C5-A3HE-01A-21D-A230-05	CESC	44	Cancer	0.62988	14250.8	0.30771	0.453543	128.702	0.147545	0.358673	0.8106		0.611	0.8	0.7019
TCGA-VS-A9V0-01A-11D-A42P-05	CESC	58	Cancer	0.545884	2221.63	0.0771811	0.302373	120.93	0.232219	0.375865	0.9785			0.65	0.8416
TCGA-HM-A3JK-01A-11D-A21R-05	CESC	64	Cancer	0.624839	15036.1	0.274188	0.442865	115.421	0.0684795	0.261377	0.7204		0.7654	0.65	0.7591
TCGA-EK-A2RJ-01A-11D-A18K-05	CESC	51	Cancer	0.395933	4096.89	0.0975544	0.285047	114.517	0.387011	0.541069	0.8127		0.5555	0.7	0.7019
TCGA-FU-A3HZ-01A-11D-A212-05	CESC	64	Cancer	0.737837	11082.7	0.235139	0.425839	114.63	0.479329	0.674056	0.9366		0.611	0.8	0.6126
TCGA-ZJ-AAXI-01A-11D-A42P-05	CESC	67	Cancer	0.844262	21355.3	0.406431	0.612843	140.951	0.262356	0.533516	0.9464			0.9	0.8198
TCGA-DR-A0ZL-01A-11D-A10W-05	CESC	53	Cancer	0.536757	12968.8	0.277324	0.40506	115.707	0.134611	0.385135	0.9638		0.5208	0.43	0.9253
TCGA-DS-A7WF-01A-11D-A357-05	CESC	41	Cancer	0.871166	24497.5	0.528322	0.692283	143.707	0.109136	0.327719	0.9203		0.853	0.9	0.862
TCGA-MY-A913-01A-11D-A37Q-05	CESC	28	Cancer	0.651882	10894.6	0.232298	0.493618	122.625	0.187643	0.435505	0.8626		0.7048	0.7	0.7019
TCGA-C5-A7UI-01A-11D-A36K-05	CESC	42	Cancer	0.678323	16687.7	0.31271	0.503375	116.895	0.24449	0.525183	0.7915		0.5655	0.95	0.7274
TCGA-MU-A5YI-01A-11D-A32T-05	CESC	60	Cancer	0.735456	17044.9	0.301526	0.5441	117.539	0.119288	0.325614	0.7683		0.8262	0.7	0.7466
TCGA-BI-A0VR-01A-11D-A10W-05	CESC	53	Cancer	0.59094	13619.6	0.248011	0.459874	115.181	0.159398	0.460062	0.7911		0.5989	0.7	0.7268
TCGA-C5-A7X5-01A-11D-A36K-05	CESC	72	Cancer	0.881757	23549.3	0.436271	0.662652	141.66	0.143071	0.314037	0.9609		0.9416	0.8	0.9574
TCGA-IR-A3LL-01A-11D-A212-05	CESC	60	Cancer	0.612447	15422.7	0.292827	0.440196	117.151	0.162548	0.430727	0.727		0.5838	0.9	0.6398
TCGA-EA-A3QD-01A-32D-A230-05	CESC	59	Cancer	0.695583	22169.2	0.458062	0.590347	134.832	0.118016	0.403443	0.5746		0.6654	0.8	0.6415
TCGA-EA-A3Y4-01A-51D-A244-05	CESC	40	Cancer	0.611977	13920.2	0.260231	0.436425	117.084	0.275233	0.502159	0.7234		0.4363	0.6	0.6126
TCGA-JX-A3Q0-01A-11D-A21R-05	CESC	63	Cancer	0.750829	14937.9	0.274987	0.475441	106.65	0.344141	0.674466	0.8454		0.4855	0.7	0.4302
TCGA-VS-A8EJ-01A-11D-A37Q-05	CESC	60	Cancer	0.664851	3217.53	0.0910377	0.385091	98.0871	0.166843	0.368863	0.9378		0.9324	0.7	0.9261
TCGA-JW-A5VH-01A-11D-A28C-05	CESC	53	Cancer	0.807547	12842	0.24856	0.465141	129.477	0.398392	0.604217	0.9656		0.6603	0.9	0.6355
TCGA-R2-A69V-01A-11D-A32T-05	CESC	42	Cancer	0.516079	11897.3	0.214729	0.409327	114.002	0.191229	0.3797	0.5152		0.4214	0.6	0.3548
TCGA-VS-A8QF-01A-21D-A37Q-05	CESC	42	Cancer	0.751982	23585.9	0.471321	0.626543	144.187	0.301873	0.604053	0.8492		0.6489	0.8	0.7019
TCGA-IR-A3LC-01A-11D-A212-05	CESC	40	Cancer	0.793765	24141.5	0.525583	0.638403	147.696	0.305859	0.533133	0.9047		0.8207	0.85	0.8806
TCGA-VS-A958-01A-11D-A42P-05	CESC	46	Cancer	0.575878	12281.8	0.210548	0.433641	108.106	0.192279	0.480035	0.7404			0.9	0.7246
TCGA-Q1-A6DW-01A-11D-A32T-05	CESC	44	Cancer	0.818161	19527.4	0.370198	0.604295	148.289	0.179804	0.408572	0.9053		0.7831	0.6	0.7799
TCGA-VS-A9U5-01A-11D-A42P-05	CESC	57	Cancer	0.75409	22754.1	0.476091	0.59922	139.685	0.183396	0.444675	0.8906			0.6	0.7372
TCGA-VS-A8QM-01A-11D-A37Q-05	CESC	47	Cancer	0.486983	11439.1	0.214152	0.392626	98.2197	0.138916	0.417276	0.6683		0.5565	0.6	0.5601
TCGA-DR-A0ZM-01A-12D-A10W-05	CESC	61	Cancer	0.494063	8022.2	0.156518	0.386774	113.259	0.275379	0.464818	0.7407		0.4731	0.55	0.6584
TCGA-VS-A9UC-01A-11D-A42P-05	CESC	32	Cancer	0.74336	16522.8	0.314049	0.53668	146.42	0.25056	0.462978	0.8256			0.9	0.8271
TCGA-GH-A9DA-01A-21D-A37Q-05	CESC	27	Cancer	0.791765	17962.3	0.354747	0.568915	128.781	0.104185	0.35119	0.8599		0.7604	0.7	0.7532
TCGA-EK-A3GJ-01A-21D-A212-05	CESC	51	Cancer	0.844709	22495.6	0.427286	0.628327	138.75	0.133512	0.373613	0.8311		0.8027	0.85	0.8029
TCGA-C5-A1BN-01B-11D-A14Z-05	CESC	26	Cancer	0.717215	10929	0.226009	0.446557	103.56	0.319542	0.566684	0.9711		0.6563	0.8	0.7913
TCGA-C5-A2LT-01A-11D-A18K-05	CESC	38	Cancer	0.631426	15744.1	0.300278	0.463169	134.506	0.235772	0.488132	0.8087		0.5766	0.65	0.6573
TCGA-JX-A3PZ-01A-11D-A21R-05	CESC	25	Cancer	0.631891	13396.8	0.212154	0.458716	130.308	0.34112	0.504349	0.7846		0.7494	0.9	0.718
TCGA-MA-AA3W-01A-11D-A388-05	CESC	54	Cancer	0.598039	16460.6	0.33393	0.472918	128.837	0.144431	0.453424	0.7537		0.4631	0.7	0.676
TCGA-C5-A1MI-01A-11D-A14Z-05	CESC	50	Cancer	0.74729	13404.2	0.264098	0.506351	114.519	0.147871	0.379685	0.8919		0.8228	0.8	0.8266
TCGA-FU-A3TX-01A-11D-A230-05	CESC	78	Cancer	0.866948	18525.7	0.30995	0.606302	142.92	0.0950584	0.262398	0.8888		0.7951	0.7	0.794
TCGA-C5-A2LS-01A-22D-A230-05	CESC	37	Cancer	0.787211	21111	0.44965	0.572402	128.539	0.0833753	0.285449	0.9867		0.7603	0.65	0.8806
TCGA-FU-A3NI-01A-11D-A21R-05	CESC	45	Cancer	0.730163	18089.2	0.364262	0.514509	119.921	0.155677	0.397106	0.8774		0.8532	0.8	0.8441
TCGA-C5-A8YR-01A-12D-A37Q-05	CESC	56	Cancer	0.744506	10695.9	0.210333	0.464893	138.039	0.414297	0.537904	0.8052		0.7462	0.6	0.7365
TCGA-EK-A2RK-01A-11D-A18K-05	CESC	67	Cancer	0.707214	12605.8	0.227758	0.44315	113.132	0.211112	0.46537	0.8772		0.7678	0.7	0.7618
TCGA-EA-A411-01A-11D-A244-05	CESC	50	Cancer	0.560567	11554.6	0.213602	0.398185	120.82	0.350104	0.524524	0.81		0.5903	0.65	0.6126
TCGA-EK-A2PI-01A-11D-A18K-05	CESC	44	Cancer	0.731967	12092.3	0.237964	0.533747	111.557	0.163268	0.300678	0.9382		0.9291	0.68	0.9266
TCGA-FU-A23K-01A-11D-A16P-05	CESC	28	Cancer	0.718774	17681.4	0.405074	0.565686	119.199	0.107716	0.326312	0.7949		0.7018	0.8	0.732
TCGA-EK-A2RM-01A-21D-A18K-05	CESC	40	Cancer	0.703499	15142.7	0.281412	0.522392	113.484	0.266912	0.455836	0.8933		0.9199	0.95	0.9253
TCGA-VS-A957-01A-11D-A42P-05	CESC	64	Cancer	0.948597	21370.1	0.412014	0.679745	131.297	0.124104	0.344961	0.9791			0.9	0.842
TCGA-JW-A852-01A-11D-A357-05	CESC	42	Cancer	0.78695	22629.8	0.451234	0.632753	140.961	0.197121	0.461052	0.9227		0.8249	0.9	0.9055
TCGA-EK-A2RB-01A-11D-A18K-05	CESC	48	Cancer	0.792854	22476.6	0.402808	0.585582	109.594	0.367498	0.544176	0.9314		0.7682	0.92	0.8985
TCGA-EA-A1QS-01A-61D-A230-05	CESC	46	Cancer	0.507143	11507.7	0.204952	0.389868	111.559	0.0753683	0.300612	0.7385		0.7595	0.6	0.6573
TCGA-EA-A3HT-01A-61D-A21R-05	CESC	68	Cancer	0.575699	12323.2	0.226567	0.400934	99.4177	0.1528	0.426184	0.7913		0.6804	0.85	0.7272
TCGA-EA-A5ZE-01A-11D-A28C-05	CESC	54	Cancer	0.691401	17945.4	0.367742	0.521994	131.21	0.101114	0.27609	0.7461		0.7729	0.7	0.6658
TCGA-MY-A5BD-01A-11D-A26S-05	CESC	62	Cancer	0.944797	26032.2	0.576168	0.735455	132.697	0.072313	0.269776	0.9705		0.9335	0.9	0.9567
TCGA-C5-A7X3-01A-11D-A357-05	CESC	70	Cancer	0.5137	13816.9	0.258523	0.443762	120.551	0.250241	0.518014	0.8025		0.4199	0.6	0.7423
TCGA-C5-A0TN-01A-21D-A14Z-05	CESC	21	Cancer	0.810407	13405.4	0.23874	0.51047	109.744	0.219245	0.46573	0.9126		0.8308	0.925	0.8918
TCGA-VS-A9UI-01A-11D-A42P-05	CESC	76	Cancer	0.703361	17512.8	0.359653	0.539961	137.332	0.341911	0.574257	0.885			0.6	0.7335
TCGA-VS-A9U7-01A-11D-A42P-05	CESC	30	Cancer	0.817563	21406.6	0.429355	0.632358	143.501	0.182217	0.513191	0.8304			0.9	0.4283
TCGA-FU-A3EO-11A-13D-A212-05	CESC	55	Normal	0.0652036	-124.867	0.0303251	0.0926686	84.944	0.0380205	0.189053
TCGA-2W-A8YY-01A-11D-A37Q-05	CESC	51	Cancer	0.755393	12467.4	0.281304	0.558399	140.771	0.349419	0.597807	0.9303		0.6655	0.7	0.6416
TCGA-VS-A9V4-01A-12D-A42P-05	CESC	63	Cancer	0.504841	6847.14	0.167893	0.295806	108.499	0.265125	0.369812	0.9719			0.6	0.7925
TCGA-VS-A94Y-01A-11D-A388-05	CESC	47	Cancer	0.667551	16480.1	0.293253	0.469444	134.475	0.27954	0.424477	0.8721		0.7369	0.8	0.836
TCGA-VS-A9UH-01A-11D-A42P-05	CESC	53	Cancer	0.544341	15721.6	0.2987	0.443799	127.862	0.146053	0.372073	0.6039			0.9	0.5426
TCGA-WL-A834-01A-11D-A357-05	CESC	57	Cancer	0.745227	20987.4	0.423543	0.540593	134.32	0.219934	0.454597	0.9403		0.7898	0.8	0.7877
TCGA-JW-AAVH-01A-11D-A388-05	CESC	46	Cancer	0.905328	21092.8	0.402527	0.609069	137.215	0.47163	0.78585	0.9653		0.4286	0.85	0.7913
TCGA-EX-A449-01A-11D-A244-05	CESC	42	Cancer	0.860965	26984.3	0.602398	0.703838	131.634	0.0968157	0.306423	0.9758		0.9178	0.8	0.9382
TCGA-VS-A9UA-01A-11D-A42P-05	CESC	60	Cancer	0.688259	13799.1	0.252449	0.513356	131.024	0.215069	0.447366				0.6
TCGA-W5-AA33-01A-11D-A418-05	CHOL	60	Cancer	0.582324	15995.8	0.367258	0.507349	124.974	0.111275	0.257989
TCGA-W5-AA2G-01A-11D-A418-05	CHOL	62	Cancer	0.585576	8534.63	0.202939	0.43435	121.342	0.154298	0.268585
TCGA-W5-AA34-11A-11D-A418-05	CHOL	75	Normal	0.163408	1225.94	0.0540504	0.134247	91.4753	0.0782946	0.265831
TCGA-W5-AA34-01A-11D-A418-05	CHOL	75	Cancer	0.508902	4873.36	0.117279	0.36848	114.577	0.16897	0.291919
TCGA-W5-AA39-01A-11D-A418-05	CHOL	81	Cancer	0.535827	2531.79	0.0827553	0.273501	96.9574	0.179981	0.32084
TCGA-W5-AA2I-11A-11D-A418-05	CHOL	66	Normal	0.250896	2456.32	0.0840885	0.181606	95.2084	0.126618	0.275421
TCGA-YR-A95A-01A-12D-A418-05	CHOL	52	Cancer	0.729565	13585.2	0.318663	0.598935	126.687	0.0425465	0.154845
TCGA-W6-AA0S-01A-11D-A418-05	CHOL	46	Cancer	0.694405	9813.6	0.225084	0.545121	137.932	0.186593	0.36156
TCGA-W5-AA2X-11A-11D-A418-05	CHOL	67	Normal	0.180804	1507.17	0.0666346	0.160237	97.747	0.198609	0.245617
TCGA-W5-AA2Z-01A-11D-A418-05	CHOL	29	Cancer	0.577895	8273.92	0.185635	0.503453	125.776	0.0807866	0.215005
TCGA-W5-AA2R-01A-11D-A418-05	CHOL	77	Cancer	0.607209	11496.2	0.237472	0.532044	105.765	0.09723	0.276362
TCGA-W5-AA2W-01A-11D-A418-05	CHOL	31	Cancer	0.798021	14436.9	0.323667	0.658066	138.625	0.0382356	0.176371
TCGA-W5-AA30-11A-11D-A418-05	CHOL	82	Normal	0.244718	2897.25	0.0845083	0.177516	94.0937	0.0830613	0.285932
TCGA-W5-AA2Q-01A-11D-A418-05	CHOL	68	Cancer	0.856393	11904.3	0.289148	0.664204	131.887	0.156941	0.252421
TCGA-W5-AA2Q-11A-11D-A418-05	CHOL	68	Normal	0.241837	2365.04	0.0795538	0.156664	96.6394	0.123101	0.325622
TCGA-ZD-A8I3-01A-11D-A418-05	CHOL	73	Cancer	0.692077	15593.2	0.351214	0.600069	129.196	0.169962	0.324546
TCGA-3X-AAVB-01A-31D-A418-05	CHOL	70	Cancer	0.590282	10950.6	0.223623	0.479515	116.044	0.161487	0.361172
TCGA-3X-AAVA-01A-11D-A418-05	CHOL	50	Cancer	0.723948	11931.5	0.278583	0.608539	133.819	0.0937737	0.204901
TCGA-W5-AA2U-01A-11D-A418-05	CHOL	78	Cancer	0.795315	21906.9	0.500692	0.687999	125.847	0.11429	0.283231
TCGA-W5-AA2O-01A-11D-A418-05	CHOL	57	Cancer	0.599029	5065.73	0.124796	0.43572	126.864	0.186361	0.29979
TCGA-ZH-A8Y8-01A-51D-A418-05	CHOL	73	Cancer	0.479402	5502.14	0.126733	0.333488	106.584	0.178373	0.306497
TCGA-ZH-A8Y4-01A-11D-A418-05	CHOL	58	Cancer	0.773406	14392.4	0.325675	0.591776	127.907	0.110076	0.27787
TCGA-W5-AA2R-11A-11D-A418-05	CHOL	77	Normal	0.195805	1426.64	0.0589727	0.127016	92.4058	0.100736	0.304945
TCGA-W5-AA38-01A-11D-A418-05	CHOL	55	Cancer	0.579048	9130.28	0.203848	0.472511	117.903	0.150305	0.276709
TCGA-3X-AAVE-01A-11D-A418-05	CHOL	60	Cancer	0.468809	5914.06	0.151581	0.41086	118.958	0.116878	0.259413
TCGA-ZU-A8S4-01A-11D-A418-05	CHOL	52	Cancer	0.428341	7627.61	0.171553	0.33152	109.509	0.125832	0.333554
TCGA-ZU-A8S4-11A-11D-A418-05	CHOL	52	Normal	0.146097	953.151	0.053473	0.118304	92.4687	0.0796427	0.23542
TCGA-W5-AA2H-01A-31D-A418-05	CHOL	70	Cancer	0.373324	7062.41	0.153447	0.332416	99.9181	0.120608	0.339754
TCGA-W5-AA2I-01A-32D-A418-05	CHOL	66	Cancer	0.824736	19959.5	0.43583	0.682721	137.461	0.127752	0.193033
TCGA-W5-AA30-01A-31D-A418-05	CHOL	82	Cancer	0.705989	19438.1	0.424866	0.579645	124.184	0.173042	0.313693
TCGA-4G-AAZO-01A-12D-A418-05	CHOL	71	Cancer	0.66814	8209.23	0.189184	0.569774	107.422	0.0544595	0.161579
TCGA-W5-AA2U-11A-11D-A418-05	CHOL	78	Normal	0.251966	2241.52	0.0777985	0.154523	95.4882	0.145456	0.302815
TCGA-ZH-A8Y5-01A-11D-A418-05	CHOL	69	Cancer	0.875533	21001.6	0.458991	0.74164	142.83	0.0476805	0.189076
TCGA-ZH-A8Y2-01A-11D-A418-05	CHOL	59	Cancer	0.512915	5172.04	0.113952	0.319315	136.795	0.33418	0.396017
TCGA-W5-AA31-01A-11D-A418-05	CHOL	71	Cancer	0.404311	2707.48	0.0836438	0.305284	99.3532	0.147931	0.27647
TCGA-W5-AA31-11A-11D-A418-05	CHOL	71	Normal	0.176454	1574.24	0.067005	0.15359	95.2682	0.116547	0.250067
TCGA-WD-A7RX-01A-12D-A418-05	CHOL	71	Cancer	0.641636	14658.4	0.329194	0.546599	129.032	0.192642	0.347963
TCGA-W5-AA2X-01A-11D-A418-05	CHOL	67	Cancer	0.356061	1938.54	0.06109	0.256482	101.563	0.259534	0.486714
TCGA-ZH-A8Y1-01A-11D-A418-05	CHOL	74	Cancer	0.685574	10338.1	0.236818	0.583061	129.987	0.124137	0.266207
TCGA-3X-AAV9-01A-72D-A418-05	CHOL	72	Cancer	0.430643	8947.38	0.202356	0.367335	96.9924	0.135437	0.347512
TCGA-W5-AA2T-01A-12D-A418-05	CHOL	64	Cancer	0.895394	22518.3	0.521254	0.744302	147.222	0.124167	0.351278
TCGA-4G-AAZT-01A-11D-A418-05	CHOL	62	Cancer	0.682619	10623.2	0.252771	0.593334	122.611	0.0892764	0.18911
TCGA-W5-AA36-01A-11D-A418-05	CHOL	51	Cancer	0.826862	18548.3	0.413324	0.692238	144.23	0.203139	0.28454
TCGA-ZH-A8Y6-01A-11D-A418-05	CHOL	41	Cancer	0.0940927	505.412	0.0424115	0.118156	90.3736	0.188029	0.380493
TCGA-3X-AAVC-01A-21D-A418-05	CHOL	72	Cancer	0.596391	7632.39	0.174914	0.441434	105.764	0.209281	0.405656
TCGA-A6-5662-01A-01D-1651-05	COAD	46	Cancer	0.844851	13221.1	0.264134	0.508077	101.354	0.312836	0.493792	0.9315	0.95	0.9674	0.85	0.9569
TCGA-AZ-6605-01A-11D-1837-05	COAD	77	Cancer	0.546502	12086.6	0.244888	0.402243	111.826	0.156388	0.409981	0.7052	0.26	0.6563	0.6	0.6114
TCGA-F4-6461-01A-11D-1772-05	COAD	41	Cancer	0.704264	20946.5	0.447524	0.576687	123.412	0.201771	0.370156	0.8282	0.59	0.8222	0.825	0.7498
TCGA-A6-2686-01A-01D-1407-05	COAD	81	Cancer	0.71544	21977.2	0.478354	0.564777	140.055	0.309902	0.559067	0.7057	0.55	0.6745	0.75	0.6683
TCGA-A6-5666-01A-01D-1651-05	COAD	78	Cancer	0.845722	15699.6	0.325343	0.469385	104.872	0.411344	0.625525	0.9678	0.92	0.7349	0.8	0.8924
TCGA-G4-6302-11A-01D-1721-05	COAD	90	Normal	0.512392	8250.97	0.194664	0.374753	106.73	0.17355	0.326031
TCGA-G4-6298-01A-11D-1721-05	COAD	90	Cancer	0.653467	14745.3	0.296724	0.440139	105.258	0.199809	0.438172	0.9523	0.61	0.7557	0.7	0.7918
TCGA-DM-A282-01A-12D-A16X-05	COAD	60	Cancer	0.775908	19562.7	0.372542	0.500484	127.041	0.22388	0.486207	0.9535		0.8478	0.8	0.8559
TCGA-CM-4748-01A-01D-1407-05	COAD	53	Cancer	0.6189	16085.7	0.312729	0.479718	133.166	0.238184	0.469883		0.63	0.76	0.75	0.7527
TCGA-AA-3502-11A-01D-1407-05	COAD	73	Normal	0.364412	6254.65	0.142574	0.341217	95.2181	0.0742952	0.313689
TCGA-AM-5821-01A-01D-1651-05	COAD	68	Cancer	0.685803	19619.9	0.412786	0.536415	135.285	0.424214	0.61831	0.8092	0.32	0.5545	0.75	0.6289
TCGA-G4-6302-01A-11D-1721-05	COAD	90	Cancer	0.410298	10988.1	0.237144	0.30746	103.487	0.0734523	0.28141	0.71		0.6062	0.785	0.6167
TCGA-CM-6164-01A-11D-1651-05	COAD	46	Cancer	0.607255	12601.4	0.236821	0.38404	98.648	0.247409	0.496774	0.9019	0.43	0.6424	0.8	0.6806
TCGA-QG-A5YV-01A-11D-A28O-05	COAD	64	Cancer	0.87921	22789.8	0.415239	0.610137	135.168	0.246917	0.504202	0.9584		0.8135	0.75	0.8848
TCGA-AD-A5EK-01A-11D-A28O-05	COAD	51	Cancer	0.84459	23932.1	0.468704	0.653801	129.883	0.202077	0.429273	0.9499		0.9652	0.65	0.9682
TCGA-D5-6931-01A-11D-1926-05	COAD	77	Cancer	0.615843	19164.8	0.403751	0.513379	132.322	0.282136	0.51986	0.8367	0.48	0.8046	0.675	0.7901
TCGA-D5-6927-01A-21D-1926-05	COAD	34	Cancer	0.551523	11747.3	0.230213	0.37511	113.493	0.140272	0.401675	0.7765		0.7585	0.75	0.7466
TCGA-CM-5341-01A-01D-1407-05	COAD	82	Cancer	0.685509	17856.5	0.35938	0.481284	117.991	0.158112	0.39855		0.5	0.7938	0.75	0.6573
TCGA-A6-A5ZU-01A-11D-A28O-05	COAD	59	Cancer	0.765557	17401.4	0.306199	0.487302	94.5329	0.263767	0.495891	0.7937		0.6977	0.7	0.7049
TCGA-DM-A1D7-01A-11D-A153-05	COAD	82	Cancer	0.680198	16034.3	0.328686	0.494065	107.675	0.201366	0.475972	0.9443	0.72	0.8116	0.8	0.8295
TCGA-CM-5862-01A-01D-1651-05	COAD	80	Cancer	0.854871	18876.5	0.342812	0.554555	102.599	0.409479	0.629305	0.9395	0.86	0.8434	0.85	0.8896
TCGA-AA-3660-11A-01D-1721-05	COAD	51	Normal	0.374903	4929.44	0.120655	0.277394	94.9265	0.0720726	0.287664
TCGA-AZ-6607-01A-11D-1837-05	COAD	69	Cancer	0.643162	20083.4	0.393112	0.510596	125.65	0.15103	0.429077	0.6976	0.5	0.7594	0.8	0.6945
TCGA-F4-6569-01A-11D-1772-05	COAD	60	Cancer	0.556573	13504.1	0.278078	0.433064	97.6474	0.166362	0.425058	0.6678	0.41	0.6711	0.675	0.6038
TCGA-CM-4743-01A-01D-1721-05	COAD	69	Cancer	0.540315	14407.7	0.321407	0.400032	121.041	0.153986	0.360768	0.8915	0.42	0.4726	0.675	0.5612
TCGA-F4-6805-01A-11D-1837-05	COAD	58	Cancer	0.567171	11519.5	0.239973	0.38361	116.56	0.131827	0.376804	0.7479	0.46	0.6872	0.775	0.6399
TCGA-G4-6298-11A-01D-1721-05	COAD	90	Normal	0.491774	8609.59	0.182959	0.37747	96.6985	0.097956	0.306553
TCGA-A6-2680-11A-01D-1551-05	COAD	72	Normal	0.463715	4488.51	0.111985	0.284396	94.1339	0.0647165	0.257131
TCGA-A6-2680-01A-01D-1407-05	COAD	72	Cancer	0.732261	16205	0.332542	0.518584	128.492	0.328942	0.568499		0.58	0.7741	0.7	0.769
TCGA-D5-6541-01A-11D-1721-05	COAD	49	Cancer	0.610001	14995.9	0.300734	0.421593	118.108	0.267067	0.535696	0.739	0.58	0.6274	0.725	0.6845
TCGA-D5-6529-01A-11D-1772-05	COAD	69	Cancer	0.614802	16989.1	0.330751	0.465354	116.677	0.212599	0.493982	0.7185	0.39	0.6167	0.71	0.6063
TCGA-D5-6533-01A-11D-1721-05	COAD	68	Cancer	0.682908	13811.7	0.283643	0.464894	123.191	0.269326	0.540772	0.9011	0.69	0.7767	0.85	0.7948
TCGA-A6-3809-01A-01D-A27A-05	COAD	71	Cancer	0.670454	21676.6	0.445343	0.555471	138.714	0.343979	0.568567			0.6272	0.8	0.6996
TCGA-CM-5348-01A-21D-1721-05	COAD	72	Cancer	0.639706	14693.1	0.292631	0.463204	107.057	0.357465	0.512039	0.7164	0.57	0.7419	0.7	0.7174
TCGA-CM-6674-01A-11D-1837-05	COAD	39	Cancer	0.562133	12264.1	0.226306	0.409844	122.878	0.165078	0.426295	0.8474	0.5	0.6848	0.8	0.7055
TCGA-A6-2681-01A-01D-1407-05	COAD	73	Cancer	0.672985	18354.5	0.346815	0.493626	127.027	0.225256	0.511447		0.56	0.7013	0.725	0.6939
TCGA-CM-6679-01A-11D-1837-05	COAD	58	Cancer	0.637906	15247.6	0.285285	0.479113	110.647	0.204968	0.513314	0.8152	0.39	0.7351	0.775	0.6281
TCGA-AD-6963-01A-11D-1926-05	COAD	58	Cancer	0.511894	8332.22	0.189786	0.320131	97.6784	0.191672	0.450597	0.9021	0.35	0.5605	0.7	0.6548
TCGA-D5-6922-01A-11D-1926-05	COAD	76	Cancer	0.660997	13267.1	0.282569	0.447331	118.025	0.344322	0.562284	0.8365	0.63	0.7585	0.675	0.7744
TCGA-D5-6924-01A-11D-1926-05	COAD	68	Cancer	0.663943	15497.4	0.311111	0.455251	108.624	0.241714	0.527101	0.7636	0.5	0.0651	0.65	0.6632
TCGA-D5-6530-01A-11D-1721-05	COAD	53	Cancer	0.674175	16076.7	0.293154	0.488639	126.61	0.279893	0.517398	0.839	0.73	0.6474	0.8	0.7916
TCGA-DM-A0X9-01A-11D-A153-05	COAD	71	Cancer	0.810322	24126	0.474221	0.627291	142.889	0.387221	0.612681	0.9334	0.76	0.7092	0.7	0.8374
TCGA-A6-2686-11A-01D-1551-05	COAD	81	Normal	0.476682	7550.23	0.167152	0.365592	95.5982	0.0816628	0.296599
TCGA-AA-3502-01A-01D-1407-05	COAD	73	Cancer	0.896745	24296.2	0.472098	0.660763	143.285	0.450805	0.663146	0.9358	0.82	0.763	0.8	0.8398
TCGA-AA-3660-01A-01D-1721-05	COAD	51	Cancer	0.733373	20265	0.387401	0.544414	124.589	0.28817	0.571447	0.9175	0.77	0.7986	0.85	0.893
TCGA-G4-6625-11A-01D-1772-05	COAD	77	Normal	0.377761	5773.56	0.137069	0.331957	96.4931	0.0704789	0.283517
TCGA-G4-6309-01A-21D-1837-05	COAD	40	Cancer	0.619032	9437.57	0.178472	0.440845	102.907	0.300664	0.578319	0.9478	0.8	0.7819	0.8	0.9214
TCGA-DM-A0XD-01A-12D-A153-05	COAD	65	Cancer	0.699338	20333.5	0.415094	0.532923	126.024	0.361698	0.56652	0.9314	0.66	0.7146	0.675	0.7887
TCGA-CK-4951-01A-01D-1407-05	COAD	79	Cancer	0.673603	20404	0.445292	0.518422	121.908	0.221018	0.505034	0.7516	0.6	0.6919	0.75	0.6729
TCGA-A6-6651-01A-21D-1837-05	COAD	55	Cancer	0.521419	7564.73	0.183227	0.343964	107.266	0.160296	0.385445	0.6086	0.38	0.7055	0.6	0.606
TCGA-5M-AAT6-01A-11D-A40X-05	COAD	40	Cancer	0.402891	4925.42	0.114171	0.268777	104.142	0.172054	0.391791	0.7275			0.8	0.6712
TCGA-A6-A56B-01A-31D-A28O-05	COAD	57	Cancer	0.760144	17267.4	0.361269	0.569093	124.812	0.21277	0.445942	0.9186		0.8829	0.7	0.8971
TCGA-A6-5657-01A-01D-1651-05	COAD	65	Cancer	0.535327	13760.5	0.289806	0.412624	121.862	0.175133	0.42231	0.8241	0.31	0.564	0.65	0.647
TCGA-CM-6676-01A-11D-1837-05	COAD	82	Cancer	0.621708	13048	0.272168	0.4341	117.087	0.223482	0.465039	0.9243	0.55	0.8288	0.75	0.7789
TCGA-F4-6703-01A-11D-1837-05	COAD	64	Cancer	0.389956	5218.2	0.127655	0.261784	101.299	0.0958528	0.318893	0.4242	0.17	0.465	0.725	0.3651
TCGA-F4-6809-01A-11D-1837-05	COAD	52	Cancer	0.609606	16733.1	0.321575	0.457302	112.517	0.155399	0.41808	0.7947	0.54	0.6855	0.8	0.7033
TCGA-DM-A0XF-01A-11D-A153-05	COAD	68	Cancer	0.5959	10727.5	0.241538	0.409699	111.227	0.199791	0.447503	0.9108	0.59	0.7427	0.65	0.7395
TCGA-D5-7000-01A-11D-1926-05	COAD	79	Cancer	0.732534	22127.2	0.428944	0.57268	134.566	0.334237	0.593995	0.8635	0.67	0.7041	0.7	0.7947
TCGA-AY-5543-01A-01D-1651-05	COAD	65	Cancer	0.692467	12497.8	0.275881	0.462673	121.784	0.302747	0.553065	0.9215	0.7	0.588	0.8	0.8266
TCGA-RU-A8FL-01A-11D-A36Y-05	COAD	51	Cancer	0.765874	15796.7	0.336429	0.503983	123.218	0.31395	0.527976	0.9941		0.8112	0.8	0.836
TCGA-F4-6463-01A-11D-1721-05	COAD	51	Cancer	0.61275	14007.1	0.269218	0.43816	96.3782	0.243408	0.469117	0.8678	0.57	0.691	0.8	0.7027
TCGA-DM-A1D0-01A-11D-A153-05	COAD	79	Cancer	0.747807	8479.88	0.195949	0.396816	119.197	0.198557	0.462344	0.9901	0.84	0.8725	0.7	0.9594
TCGA-G4-6625-01A-21D-1772-05	COAD	77	Cancer	0.594176	12889.1	0.27672	0.433375	105.319	0.18183	0.460983	0.7372	0.34	0.6485	0.6	0.6377
TCGA-CK-4950-01A-01D-1721-05	COAD	68	Cancer	0.608454	17202.1	0.368899	0.500552	124.133	0.231309	0.519182	0.8581	0.43	0.662	0.575	0.6376
TCGA-D5-6532-01A-11D-1721-05	COAD	61	Cancer	0.748289	19131.9	0.378467	0.568699	115.434	0.350451	0.633213	0.9524	0.78	0.6952	0.7	0.8245
TCGA-DM-A1D4-01A-21D-A153-05	COAD	80	Cancer	0.794605	22818	0.463793	0.619393	129.668	0.346484	0.587896	0.971	0.82	0.825	0.7	0.8848
TCGA-D5-6536-01A-11D-1721-05	COAD	73	Cancer	0.669667	15068.5	0.276077	0.433872	112.582	0.21506	0.379068	0.8639	0.74	0.6447	0.8	0.7527
TCGA-CM-6171-01A-11D-1651-05	COAD	77	Cancer	0.815042	23207.5	0.516324	0.587403	135.199	0.22194	0.407732	0.9107		0.7921	0.85	0.8398
TCGA-A6-6141-01A-11D-1772-05	COAD	31	Cancer	0.63934	16162.8	0.293632	0.477936	118.053	0.217319	0.501369	0.866		0.6421	0.625	0.7243
TCGA-CM-6678-01A-11D-1837-05	COAD	63	Cancer	0.663282	14831.8	0.33008	0.473029	121.327	0.190663	0.478465	0.951	0.65	0.7635	0.8	0.768
TCGA-CA-5796-01A-01D-1651-05	COAD	52	Cancer	0.778298	19282.5	0.369555	0.607799	123.205	0.245438	0.574836	0.9264	0.84	0.7817	0.8	0.9105
TCGA-D5-6531-01A-11D-1721-05	COAD	75	Cancer	0.808182	25055.2	0.515397	0.629491	134.693	0.338034	0.580359	0.8321	0.62	0.7735	0.8	0.7597
TCGA-DM-A285-01A-11D-A16X-05	COAD	71	Cancer	0.614879	18063.7	0.344239	0.48292	126.978	0.40354	0.598663	0.9391		0.7411	0.8	0.7305
TCGA-DM-A1HB-01A-22D-A17Z-05	COAD	75	Cancer	0.694892	22585.1	0.484317	0.56958	134.093	0.305159	0.568665	0.948	0.71	0.7261	0.7	0.7745
TCGA-AZ-4323-01A-21D-1837-05	COAD	37	Cancer	0.455276	11271.7	0.22586	0.342533	95.6576	0.106165	0.321375	0.6701	0.2	0.4385	0.35	0.4687
TCGA-D5-6540-01A-11D-1721-05	COAD	66	Cancer	0.761256	21713.1	0.469135	0.541845	138.666	0.277476	0.560735	0.8916	0.76	0.7509	0.8	0.8273
TCGA-G4-6586-01A-11D-1772-05	COAD	73	Cancer	0.758431	22110.8	0.472151	0.602018	138.335	0.306286	0.572637	0.9261	0.68	0.6727	0.775	0.8531
TCGA-CK-5914-01A-11D-1651-05	COAD	81	Cancer	0.818438	20985.8	0.426622	0.578501	130.158	0.236585	0.49396	0.9052	0.77	0.8588	0.8	0.8818
TCGA-D5-6929-01A-31D-1926-05	COAD	49	Cancer	0.621259	15466.7	0.283413	0.495286	113.475	0.293453	0.572845	0.838	0.48	0.7129		0.7439
TCGA-AZ-5403-01A-01D-1651-05	COAD	43	Cancer	0.51002	6613.96	0.151271	0.292922	99.6082	0.207581	0.468259	0.87	0.38	0.7107	0.75	0.7542
TCGA-A6-5667-11A-01D-1721-05	COAD	40	Normal	0.249402	2198.33	0.0678093	0.190501	92.9493	0.0556742	0.240698
TCGA-A6-6648-01A-11D-1772-05	COAD	56	Cancer	0.638384	9904.92	0.209424	0.364213	96.7217	0.261465	0.480005	0.9529	0.46	0.8242	0.725	0.7204
TCGA-CK-6748-01A-11D-1837-05	COAD	45	Cancer	0.769133	14827	0.289479	0.49034	141.468	0.215905	0.455024	0.7988	0.72	0.8964	0.725	0.8676
TCGA-NH-A8F8-01A-72D-A40X-05	COAD	79	Cancer	0.68444	17780.6	0.350045	0.505431	124.374	0.213754	0.448295	0.8809			0.85	0.7977
TCGA-CM-6677-01A-11D-1837-05	COAD	75	Cancer	0.704611	19914.1	0.413536	0.562537	136.777	0.411637	0.631686	0.8565	0.49	0.6882	0.625	0.6683
TCGA-AA-3655-01A-02D-1721-05	COAD	68	Cancer	0.756486	16850.8	0.334997	0.502507	134.105	0.24889	0.550301	0.8852	0.87	0.8236	0.95	0.841
TCGA-AA-3655-11A-01D-1721-05	COAD	68	Normal	0.338964	3947.69	0.098685	0.261348	92.5048	0.0590752	0.238458
TCGA-AD-6889-01A-11D-1926-05	COAD	76	Cancer	0.875173	28436.4	0.628228	0.69368	142.554	0.168678	0.405859	0.9399	0.87	0.346	0.8	0.8713
TCGA-A6-5665-01A-01D-1651-05	COAD	84	Cancer	0.739921	22933.2	0.501046	0.592824	134.526	0.199925	0.482942	0.9417	0.72	0.8376	0.75	0.8448
TCGA-A6-2675-01A-02D-1721-05	COAD	78	Cancer	0.572812	10531.7	0.22726	0.360496	115.926	0.201147	0.469615	0.7547	0.42	0.7337	0.4333	0.6193
TCGA-AA-3495-01A-01D-1407-05	COAD	79	Cancer	0.668679	18218.1	0.357841	0.536893	118.867	0.214287	0.480204	0.907	0.57	0.7426	0.7	0.7841
TCGA-AA-3662-01A-01D-1721-05	COAD	80	Cancer	0.698214	15377.1	0.284922	0.444536	121.124	0.35176	0.581374	0.8406	0.68	0.6438	0.9	0.8008
TCGA-AD-6899-01A-11D-1926-05	COAD	84	Cancer	0.697973	19486.9	0.37896	0.529425	128.664	0.183584	0.479848	0.7397	0.62	0.7582	0.6	0.7507
TCGA-D5-5539-01A-01D-1651-05	COAD	60	Cancer	0.695003	16341.1	0.321689	0.473405	127.265	0.321132	0.511097	0.8308	0.56	0.6812	0.8	0.7091
TCGA-AD-A5EJ-01A-11D-A28O-05	COAD	74	Cancer	0.737228	24092.6	0.517713	0.59834	136.774	0.134719	0.382182	0.9309		0.7444	0.65	0.7913
TCGA-AA-3713-01A-21D-1721-05	COAD	68	Cancer	0.645285	17592.4	0.363462	0.511051	130.389	0.381252	0.586973	0.8577	0.55	0.6396	0.765	0.7508
TCGA-G4-6297-01A-11D-1721-05	COAD	55	Cancer	0.659773	15861.8	0.298439	0.428174	121.246	0.268093	0.477265	0.7876	0.47	0.6269	0.775	0.6654
TCGA-AZ-4681-01A-01D-1407-05	COAD	79	Cancer	0.787801	11314.5	0.235858	0.454867	103.306	0.38575	0.662017		0.89	0.8887	0.8	0.904
TCGA-F4-6856-01A-11D-1926-05	COAD	45	Cancer	0.63827	19105.1	0.352308	0.501764	121.418	0.169764	0.420709	0.9244	0.6	0.7765	0.8	0.752
TCGA-AA-3488-01A-01D-1407-05	COAD	58	Cancer	0.808323	15582.1	0.303009	0.526185	134.208	0.272625	0.574451		0.82	0.8288	0.7	0.8806
TCGA-A6-2671-01A-01D-1407-05	COAD	85	Cancer	0.745387	15506.4	0.317884	0.485434	115.832	0.168309	0.428429		0.73	0.8338	0.75	0.8394
TCGA-A6-2671-11A-01D-1551-05	COAD	85	Normal	0.497428	8186.91	0.182431	0.379265	96.37	0.0649955	0.263949
TCGA-A6-6780-01A-11D-A27A-05	COAD	74	Cancer	0.750356	22625.6	0.443866	0.58866	129.149	0.329181	0.550418	0.7677	0.71	0.6669	0.6647	0.8
TCGA-DM-A28H-01A-11D-A16X-05	COAD	50	Cancer	0.774316	19813.4	0.383369	0.583437	118.533	0.330118	0.573923	0.9733	0.74	0.8623	0.65	0.8688
TCGA-CK-5913-01A-11D-1651-05	COAD	58	Cancer	0.762334	23413.7	0.47635	0.596657	131.561	0.365574	0.597914	0.8486	0.71	0.7184	0.8	0.7758
TCGA-CM-6680-01A-11D-1837-05	COAD	78	Cancer	0.72374	18324.1	0.35865	0.490501	130.95	0.370245	0.581179	0.8143	0.75	0.7198	0.8	0.7525
TCGA-AD-6548-01A-11D-1837-05	COAD	81	Cancer	0.619026	17395.4	0.333191	0.496381	101.645	0.354203	0.529963	0.8105	0.53	0.6858	0.525	0.6725
TCGA-AD-6901-01A-11D-1926-05	COAD	78	Cancer	0.678706	18003.9	0.353464	0.485369	119.05	0.202404	0.47043	0.7585	0.57	0.7223	0.6	0.7059
TCGA-AA-3511-01A-21D-1837-05	COAD	64	Cancer	0.697309	14187.9	0.281941	0.465598	136.285	0.276359	0.536576	0.8644	0.51	0.8015	0.725	0.7517
TCGA-NH-A8F7-01A-11D-A40X-05	COAD	53	Cancer	0.796967	12083.7	0.240031	0.444017	132.64	0.29451	0.55981	0.98			0.8
TCGA-CA-6716-01A-11D-1837-05	COAD	65	Cancer	0.860863	26234.3	0.533021	0.660639	139.492	0.198626	0.470714	0.936	0.75	0.9097	0.8	0.8988
TCGA-CA-5797-01A-01D-1651-05	COAD	56	Cancer	0.632149	7162.63	0.158987	0.351507	102.136	0.460453	0.646301	0.8782	0.65	0.6776	0.8	0.8122
TCGA-AA-3712-11A-01D-1721-05	COAD	65	Normal	0.405535	5455.79	0.131072	0.306985	94.8525	0.0598852	0.247071
TCGA-CA-6717-01A-11D-1837-05	COAD	57	Cancer	0.559439	15943.2	0.320684	0.450091	120.976	0.128482	0.408127	0.7057		0.626	0.8	0.6109
TCGA-4T-AA8H-01A-11D-A40X-05	COAD	42	Cancer	0.78608	21033.9	0.411084	0.59248	139.155	0.455624	0.692712	0.9865			0.6	0.8917
TCGA-A6-6650-01A-11D-1772-05	COAD	69	Cancer	0.895483	21640.3	0.40864	0.592861	123.893	0.37175	0.646936	0.9562	0.81	0.8552	0.8227	0.775
TCGA-A6-4107-01A-02D-1407-05	COAD	57	Cancer	0.773215	25164.2	0.50856	0.623864	138.733	0.268408	0.524084		0.64	0.831	0.725	0.7697
TCGA-CM-4750-01A-01D-1407-05	COAD	34	Cancer	0.748287	18137.6	0.36268	0.560217	130.956	0.333009	0.613916		0.69	0.7712	0.7	0.7913
TCGA-G4-6314-11A-01D-1721-05	COAD	76	Normal	0.472662	6458.87	0.151597	0.347808	95.3862	0.0773677	0.274131
TCGA-G4-6314-01A-11D-1721-05	COAD	76	Cancer	0.627747	11675.6	0.264307	0.408223	103.461	0.227893	0.463367	0.8386	0.51	0.7439	0.6	0.7626
TCGA-G4-6304-01A-11D-1926-05	COAD	66	Cancer	0.491828	12724.7	0.265314	0.348794	107	0.120307	0.272537	0.9593		0.5632	0.725	0.6126
TCGA-CK-4948-01B-11D-1651-05	COAD	45	Cancer	0.594935	8372	0.19055	0.358029	119.698	0.444355	0.5761	0.8599	0.51	0.5991	0.75	0.6854
TCGA-A6-2681-11A-01D-1551-05	COAD	73	Normal	0.349403	4401.93	0.113013	0.286912	94.0959	0.0785395	0.290662
TCGA-CM-4746-01A-01D-1407-05	COAD	61	Cancer	0.768888	14743.7	0.322517	0.521848	128.872	0.271028	0.490375		0.81	0.7778	0.8	0.7736
TCGA-G4-6299-01A-11D-1772-05	COAD	69	Cancer	0.697597	20886.6	0.455494	0.517915	129.015	0.170664	0.458313	0.8036	0.54	0.6846	0.75	0.6996
TCGA-A6-4105-01A-02D-1772-05	COAD	79	Cancer	0.727831	21813.1	0.440606	0.563079	129.122	0.210219	0.482058	0.7925	0.59	0.7825	0.65	0.7533
TCGA-CK-5915-01A-11D-1651-05	COAD	63	Cancer	0.925835	27597.6	0.53576	0.689286	135.063	0.294076	0.577272	0.9735	0.88	0.9353	0.8	0.9667
TCGA-AZ-6600-11A-01D-1772-05	COAD	64	Normal	0.290561	3709.57	0.0966546	0.270695	93.9829	0.0604038	0.256259
TCGA-AD-5900-01A-11D-1651-05	COAD	67	Cancer	0.650896	19721.9	0.435178	0.513423	116.969	0.203143	0.466994	0.8218	0.53	0.6895	0.85	0.7192
TCGA-CK-6746-01A-11D-1837-05	COAD	84	Cancer	0.851949	26126.6	0.530987	0.689568	136.734	0.440709	0.658782	0.852	0.85	0.8415	0.9	0.829
TCGA-CM-6166-01A-11D-1651-05	COAD	48	Cancer	0.772887	19956.9	0.395952	0.546866	129.438	0.323368	0.544547	0.9564	0.75	0.8261	0.825	0.8595
TCGA-A6-5661-01A-01D-1651-05	COAD	80	Cancer	0.741995	23578.8	0.486651	0.605637	130.473	0.182806	0.442606	0.9133	0.66	0.7708	0.72	0.7771
TCGA-AZ-4313-01A-01D-1407-05	COAD	51	Cancer	0.509363	7207.52	0.147432	0.3039	111.719	0.24655	0.474164	0.9596	0.52	0.4738	0.87	0.746
TCGA-G4-6320-11A-01D-1721-05	COAD	73	Normal	0.48692	8446.14	0.186143	0.364774	98.4585	0.0764276	0.291237
TCGA-AZ-6600-01A-11D-1772-05	COAD	64	Cancer	0.665262	17028.1	0.336642	0.52637	131.33	0.188824	0.493571	0.8075	0.51	0.7355	0.75	0.7366
TCGA-AZ-4614-01A-01D-1407-05	COAD	71	Cancer	0.816843	25258.7	0.516901	0.621929	145.446	0.351684	0.647072	0.9712	0.86	0.7851	0.8	0.9149
TCGA-NH-A6GC-01A-12D-A40X-05	COAD	66	Cancer	0.81264	15268.1	0.317541	0.538487	101.449	0.28115	0.601493	0.9045			0.65	0.8361
TCGA-G4-6320-01A-11D-1721-05	COAD	73	Cancer	0.828995	26423.5	0.531937	0.695004	145.372	0.3412	0.594372	0.9619	0.27	0.8206	0.75	0.7965
TCGA-CM-6165-01A-11D-1651-05	COAD	74	Cancer	0.738374	18221.9	0.338451	0.51954	126.685	0.200446	0.481014	0.8278	0.76	0.8752	0.8	0.8835
TCGA-A6-4107-11A-01D-1551-05	COAD	57	Normal	0.283586	3291.28	0.0907672	0.244448	92.6875	0.063301	0.266924
TCGA-G4-6323-01A-11D-1721-05	COAD	50	Cancer	0.636006	18677.6	0.369353	0.523177	134.602	0.312282	0.511551	0.9232	0.45	0.593	0.675	0.5896
TCGA-QL-A97D-01A-12D-A40X-05	COAD	84	Cancer	0.723631	19773.7	0.386653	0.550439	115.166	0.254624	0.583697	0.9135			0.8	0.7752
TCGA-D5-5538-01A-01D-1651-05	COAD	60	Cancer	0.717548	14856.5	0.292359	0.466842	136.427	0.450267	0.607199	0.7559	0.69	0.6422	0.8	0.6791
TCGA-F4-6570-01A-11D-1772-05	COAD	78	Cancer	0.733713	22730.7	0.477496	0.589625	122.824	0.262937	0.512059	0.6811	0.59	0.6984	0.8	0.6576
TCGA-F4-6807-01A-11D-1837-05	COAD	51	Cancer	0.609417	16204.7	0.309303	0.471137	108.203	0.214335	0.47333	0.6868	0.55	0.6722	0.8	0.667
TCGA-AY-6197-01A-11D-1721-05	COAD	60	Cancer	0.791204	20810.8	0.415582	0.583133	134.542	0.275173	0.556879	0.9293	0.78	0.7832	0.8	0.8412
TCGA-A6-5656-01A-21D-1837-05	COAD	74	Cancer	0.771718	17177.4	0.355532	0.559893	130.321	0.317783	0.600808	0.9606	0.81	0.8236	0.8022	0.7
TCGA-DM-A280-01A-12D-A16X-05	COAD	70	Cancer	0.523643	12570.3	0.248257	0.361943	112.07	0.20645	0.417671	0.9301	0.4	0.5404	0.75	0.5422
TCGA-AZ-4682-01B-01D-1407-05	COAD	61	Cancer	0.788656	12168.9	0.263798	0.477166	98.5439	0.305177	0.561082	0.9415	0.78	0.8272	0.725	0.8671
TCGA-5M-AATE-01A-11D-A40X-05	COAD	76	Cancer	0.765816	16785.7	0.303468	0.481914	101.866	0.242301	0.550011	0.9495			0.8	0.8443
TCGA-QG-A5YW-01A-11D-A28O-05	COAD	55	Cancer	0.76874	15768.2	0.331258	0.542755	100.857	0.37289	0.599163	0.8856		0.7093	0.65	0.7466
TCGA-CK-6747-01A-11D-1837-05	COAD	87	Cancer	0.78053	19135.6	0.372249	0.551062	126.436	0.29991	0.588691	0.9021	0.8	0.8211	0.75	0.851
TCGA-NH-A50V-01A-11D-A28O-05	COAD	69	Cancer	0.693148	21068.5	0.404658	0.54802	123.063	0.214132	0.468393	0.8372		0.7072	0.8	0.7894
TCGA-AU-6004-01A-11D-1721-05	COAD	69	Cancer	0.57431	17663.1	0.375884	0.452411	117.955	0.160538	0.42257	0.7837	0.47	0.6043	0.75	0.6553
TCGA-QG-A5Z2-01A-11D-A28O-05	COAD	61	Cancer	0.722778	23340.8	0.497375	0.602401	133.975	0.190024	0.474814	0.9298		0.7013	0.65	0.8806
TCGA-AZ-4308-01A-01D-1407-05	COAD	47	Cancer	0.653401	10818.8	0.210721	0.459038	112.978	0.225915	0.534899		0.69	0.7725	0.805	0.8171
TCGA-AZ-4615-01A-01D-1407-05	COAD	84	Cancer	0.682216	20765.7	0.451477	0.559553	129.729	0.229531	0.501758	0.7739	0.67	0.7129	0.75	0.7509
TCGA-D5-6920-01A-11D-1926-05	COAD	77	Cancer	0.592746	14569	0.30074	0.455698	113.342	0.157712	0.400977	0.8786		0.9529	0.725	0.8457
TCGA-DM-A28E-01A-11D-A16X-05	COAD	72	Cancer	0.823389	13548.4	0.258791	0.522384	133.306	0.232075	0.527362	0.9794	0.92	0.8483	0.8	0.9195
TCGA-A6-6652-01A-11D-1772-05	COAD	59	Cancer	0.81178	15332.5	0.321444	0.531341	133.396	0.257933	0.518437	0.9645	0.84	0.8599	0.8	0.9147
TCGA-AA-3506-11A-01D-1407-05	COAD	77	Normal	0.334344	5392.15	0.128985	0.289504	92.6889	0.0629481	0.27204
TCGA-AD-6888-01A-11D-1926-05	COAD	73	Cancer	0.721613	14932.8	0.288478	0.44636	114.939	0.339047	0.569267	0.9835	0.57	0.774	0.7	0.7802
TCGA-AD-6895-01A-11D-1926-05	COAD	84	Cancer	0.643376	19048.3	0.417942	0.492842	128.15	0.188431	0.454134	0.848	0.57	0.784	0.8	0.7422
TCGA-AZ-4684-01A-01D-1407-05	COAD	49	Cancer	0.639561	11779.7	0.245855	0.43991	125.023	0.330338	0.585125	0.8359	0.47	0.6898	0.75	0.729
TCGA-DM-A288-01A-11D-A16X-05	COAD	68	Cancer	0.809365	21722.3	0.432759	0.589021	116.719	0.326486	0.613786	0.9718	0.81	0.7783	0.8	0.8526
TCGA-AZ-6601-11A-01D-1772-05	COAD	68	Normal	0.418202	5560.02	0.130243	0.328242	95.5617	0.06339	0.266526
TCGA-D5-6535-01A-11D-1721-05	COAD	80	Cancer	0.685929	16890.9	0.342522	0.517431	105.909	0.296849	0.578315	0.8625	0.61	0.6739	0.8	0.6964
TCGA-CA-6718-01A-11D-1837-05	COAD	46	Cancer	0.633423	20090.8	0.413165	0.513196	125.682	0.134796	0.39359	0.7723	0.47	0.6568	0.775	0.6664
TCGA-AD-6965-01A-11D-1926-05	COAD	62	Cancer	0.837032	20028.5	0.371468	0.574043	125.09	0.454185	0.684813	0.9398	0.78	0.4024	0.76	0.8692
TCGA-CA-5255-01A-11D-1837-05	COAD	45	Cancer	0.552599	17153.3	0.335193	0.444063	115.643	0.134354	0.381505	0.9746	0.26	0.701	0.65	0.6927
TCGA-AA-3489-01A-21D-1837-05	COAD	75	Cancer	0.542407	14465.2	0.284446	0.450035	115.604	0.147813	0.431136	0.5679	0.32	0.5112	0.7	0.4634
TCGA-AY-A54L-01A-11D-A28O-05	COAD	74	Cancer	0.786206	21614.8	0.403176	0.567446	134.082	0.405597	0.61087	0.993		0.7086	0.75	0.836
TCGA-NH-A5IV-01A-42D-A36Y-05	COAD	90	Cancer	0.804545	19759	0.381477	0.556678	137.831	0.332294	0.632044	0.8343		0.6376	0.7	0.7855
TCGA-F4-6808-01A-11D-1837-05	COAD	54	Cancer	0.696336	14351.2	0.270843	0.458045	102.796	0.367986	0.558282	0.9628	0.56	0.7005	0.8	0.6939
TCGA-G4-6322-01A-11D-1721-05	COAD	65	Cancer	0.825129	23098.9	0.429203	0.623996	148.393	0.507919	0.647031	0.9237	0.88	0.7516	0.8	0.8249
TCGA-G4-6322-11A-01D-1721-05	COAD	65	Normal	0.389052	5467.22	0.132415	0.313556	95.1029	0.0637862	0.243277
TCGA-G4-6311-11A-01D-1721-05	COAD	80	Normal	0.473032	7893.4	0.176079	0.396302	97.5035	0.0886024	0.314361
TCGA-G4-6297-11A-01D-1721-05	COAD	55	Normal	0.331986	5366	0.12428	0.283882	94.3396	0.0712776	0.265379
TCGA-A6-A566-01A-11D-A28O-05	COAD	55	Cancer	0.604413	18981.5	0.398714	0.496443	130.071	0.263475	0.466341	0.5387		0.6176	0.8	0.5854
TCGA-CA-6715-01A-21D-1837-05	COAD	63	Cancer	0.804281	11791.9	0.243525	0.482572	101.591	0.351208	0.608916	0.9696	0.89	0.7615	0.7	0.9473
TCGA-CK-6751-01A-11D-1837-05	COAD	88	Cancer	0.710231	21617.3	0.447549	0.551838	134.416	0.364624	0.605529	0.8724		0.7749	0.725	0.7702
TCGA-AA-3488-11A-01D-1407-05	COAD	58	Normal	0.317535	4891.72	0.11644	0.291663	93.9539	0.06062	0.271134
TCGA-G4-6321-01A-11D-1721-05	COAD	60	Cancer	0.621152	20106.1	0.429339	0.530924	126.363	0.174814	0.478507	0.9111	0.56	0.6456	0.75	0.6939
TCGA-G4-6588-01A-11D-1772-05	COAD	58	Cancer	0.724195	21729.8	0.468499	0.572236	138.479	0.243654	0.519647	0.8929		0.7091	0.825	0.7913
TCGA-AZ-4315-01A-01D-1407-05	COAD	61	Cancer	0.688067	17615.5	0.356398	0.494941	110.382	0.214173	0.493461	0.8901	0.66	0.718	0.725	0.79
TCGA-DM-A1D8-01A-11D-A153-05	COAD	50	Cancer	0.775167	21827.8	0.433758	0.593445	141.815	0.325385	0.600699	0.9629	0.75	0.8625	0.9	0.8736
TCGA-A6-3810-01A-01D-A27A-05	COAD	62	Cancer	0.681609	11131.3	0.230884	0.403272	94.3909	0.161664	0.405691		0.62	0.7654	0.75	0.759
TCGA-A6-6649-01A-11D-1772-05	COAD	66	Cancer	0.669919	18271.6	0.37458	0.531456	106.182	0.12772	0.371672	0.8365	0.42	0.7881	0.715	0.7857
TCGA-NH-A8F7-06A-31D-A40X-05	COAD	53	Cancer	0.772394	11029.3	0.232592	0.41105	101.596	0.447282	0.715243	0.9928			0.7	0.784
TCGA-CM-6675-01A-11D-1837-05	COAD	35	Cancer	0.862669	28693.4	0.590573	0.741736	159.873	0.577613	0.746687	0.9398	0.93	0.7519	0.825	0.9288
TCGA-F4-6704-01A-11D-1837-05	COAD	60	Cancer	0.60714	10000.8	0.205792	0.366919	115.396	0.309922	0.550016	0.7281	0.49	0.7354	0.85	0.6413
TCGA-CM-6169-01A-11D-1651-05	COAD	67	Cancer	0.678236	17203.3	0.319345	0.478105	118.526	0.352452	0.591674	0.6466	0.67	0.6653	0.775	0.6415
TCGA-5M-AAT5-01A-21D-A40X-05	COAD		Cancer	0.709763	9402.9	0.20311	0.436319	93.5164	0.291296	0.546013	0.9752			0.75	0.817
TCGA-A6-2684-11A-01D-1551-05	COAD	75	Normal	0.428642	5411.44	0.130275	0.337549	95.2844	0.0740526	0.2776
TCGA-A6-2679-01A-02D-1407-05	COAD	73	Cancer	0.69167	20576.2	0.400415	0.557642	133.47	0.280396	0.566102		0.48	0.6493	0.7	0.6226
TCGA-CM-6172-01A-11D-1651-05	COAD	70	Cancer	0.765675	18774.5	0.358261	0.554656	125.195	0.140169	0.383011	0.9019	0.74	0.8593	0.8	0.867
TCGA-D5-6539-01A-11D-1721-05	COAD	45	Cancer	0.487876	9178.11	0.203375	0.341412	100.632	0.142178	0.371586	0.9021	0.23	0.7623	0.755	0.684
TCGA-G4-6626-01A-11D-1772-05	COAD	90	Cancer	0.741849	14097.3	0.279445	0.467063	100.246	0.252588	0.459049	0.9692	0.6	0.7985	0.775	0.7946
TCGA-G4-6294-01A-11D-1772-05	COAD	75	Cancer	0.834653	17262.1	0.359714	0.502378	135.622	0.211071	0.48057	0.9313	0.81	0.8291	0.8	0.8756
TCGA-A6-5664-01A-21D-1837-05	COAD	80	Cancer	0.529169	13675.8	0.281846	0.405756	116.622	0.142024	0.37582	0.7481	0.39	0.6443	0.7	0.6426
TCGA-D5-6928-01A-11D-1926-05	COAD	80	Cancer	0.52322	14915.6	0.313762	0.43416	122.059	0.20161	0.442007	0.4425	0.31	0.5196	0.55	0.4635
TCGA-QG-A5YX-01A-11D-A28O-05	COAD	61	Cancer	0.859179	15736.9	0.344918	0.526891	101.941	0.373183	0.650983	0.9711		0.7635	0.8	0.8641
TCGA-AZ-4616-01A-21D-1837-05	COAD	82	Cancer	0.622819	17461.6	0.346784	0.486799	119.247	0.230268	0.491369	0.8922	0.5	0.6975	0.75	0.6906
TCGA-AZ-6601-01A-11D-1772-05	COAD	68	Cancer	0.608837	18141.9	0.361916	0.508039	131.705	0.244615	0.488803	0.7586	0.46	0.6208	0.775	0.5991
TCGA-AZ-6603-01A-11D-1837-05	COAD	77	Cancer	0.683739	11507	0.232363	0.406422	101.856	0.295281	0.609852	0.8307	0.63	0.7255	0.8	0.7362
TCGA-CM-5349-01A-21D-1721-05	COAD	68	Cancer	0.603488	16095.8	0.307069	0.444011	112.84	0.144566	0.364852	0.8342	0.51	0.7455	0.6	0.7367
TCGA-AA-3663-01A-01D-1721-05	COAD	42	Cancer	0.771832	21238.1	0.422752	0.628193	139.782	0.307764	0.529065	0.9107	0.79	0.8441	0.7	0.8893
TCGA-AZ-6598-11A-01D-1772-05	COAD	77	Normal	0.404219	5971.75	0.143216	0.325125	94.6759	0.0781147	0.303106
TCGA-CM-5344-01A-21D-1721-05	COAD	39	Cancer	0.636944	9560.41	0.219956	0.373409	102.435	0.267264	0.507194	0.8858	0.54	0.7627	0.825	0.7177
TCGA-CM-5861-01A-01D-1651-05	COAD	63	Cancer	0.77199	22974.5	0.490327	0.586765	148.623	0.265107	0.453805	0.9434	0.74	0.7317	0.775	0.8646
TCGA-F4-6460-01A-11D-1772-05	COAD	51	Cancer	0.616397	8030.16	0.160074	0.39269	94.0262	0.163282	0.400212	0.8504	0.6	0.81	0.73	0.7696
TCGA-CM-6170-01A-11D-1651-05	COAD	73	Cancer	0.712607	11595	0.262619	0.433902	98.576	0.248876	0.487806	0.8533	0.77	0.7727	0.675	0.7895
TCGA-G4-6317-02A-11D-2064-05	COAD	51	Cancer	0.904873	13146.2	0.280826	0.535538	130.863	0.347747	0.676839	0.9643		0.8859	0.825
TCGA-A6-5659-01A-01D-1651-05	COAD	82	Cancer	0.860069	25038.4	0.50672	0.622144	147.567	0.415825	0.673942	0.9207	0.75	0.7853	0.7587	0.8
TCGA-DM-A28A-01A-21D-A16X-05	COAD	78	Cancer	0.833095	20381.6	0.394424	0.563085	131.569	0.19879	0.411343	0.926	0.87	0.9077	0.8	0.9182
TCGA-AA-3713-11A-01D-1721-05	COAD	68	Normal	0.342528	4492.1	0.110794	0.27882	94.3864	0.0688476	0.288654
TCGA-WS-AB45-01A-11D-A40X-05	COAD	52	Cancer	0.479185	13481.6	0.2873	0.366794	108.085	0.093635	0.210958	0.41			0.75	0.2093
TCGA-CM-4751-01A-02D-1837-05	COAD	62	Cancer	0.62325	20138	0.406656	0.523365	132.064	0.312997	0.572802	0.8345	0.5	0.6884	0.8	0.6852
TCGA-AZ-6599-11A-01D-1772-05	COAD	72	Normal	0.343729	3795.81	0.101093	0.272546	92.8089	0.0670906	0.261789
TCGA-AZ-6599-01A-11D-1772-05	COAD	72	Cancer	0.875419	23422	0.458855	0.661953	145.795	0.495097	0.630732	0.983	0.17	0.7101	0.8	0.7203
TCGA-AY-6386-01A-21D-1721-05	COAD	66	Cancer	0.674225	19636.9	0.39356	0.497986	127.81	0.234947	0.466082	0.9177	0.7	0.637	0.6	0.8266
TCGA-D5-6926-01A-11D-1926-05	COAD	65	Cancer	0.671197	16588.3	0.312883	0.430442	116.701	0.226913	0.506843	0.7962	0.5	0.4774	0.425	0.6854
TCGA-A6-2685-01A-01D-1407-05	COAD	48	Cancer	0.480446	6650.41	0.143339	0.285167	99.5204	0.132688	0.392043	0.7011	0.36	0.682	0.725	0.6328
TCGA-A6-2685-11A-01D-1551-05	COAD	48	Normal	0.29629	3351.07	0.0890323	0.241525	94.6939	0.0628506	0.267884
TCGA-CK-5916-01A-11D-1651-05	COAD	71	Cancer	0.682868	21378.8	0.452429	0.532578	123.023	0.203721	0.456802	0.773	0.59	0.6663	0.8	0.7022
TCGA-F4-6806-01A-11D-1837-05	COAD	59	Cancer	0.718167	22523.3	0.447397	0.581396	133.099	0.294125	0.580063	0.8933	0.71	0.7206	0.8	0.8361
TCGA-A6-6782-01A-11D-1837-05	COAD	82	Cancer	0.662905	15571.9	0.309955	0.465527	117.407	0.225471	0.529828	0.7666	0.52	0.7443	0.655	0.6936
TCGA-A6-6653-01A-11D-1772-05	COAD	82	Cancer	0.856291	26221.1	0.589356	0.664582	139.513	0.164432	0.440855	0.8776	0.68	0.9007	0.755	0.826
TCGA-AA-3494-01A-01D-1407-05	COAD	55	Cancer	0.707821	9718.98	0.204571	0.379064	99.3474	0.297553	0.56945		0.74	0.8576	0.7	0.8646
TCGA-AA-3494-11A-01D-1407-05	COAD	55	Normal	0.297914	4269.54	0.104723	0.265911	93.9382	0.0610913	0.270148
TCGA-AZ-6608-01A-11D-1837-05	COAD	55	Cancer	0.85978	10243.8	0.250881	0.507264	102.522	0.403914	0.666994	0.9872	0.89	0.8969	0.8	0.9534
TCGA-DM-A1DB-01A-11D-A153-05	COAD	68	Cancer	0.78165	14553.5	0.293518	0.519977	102.075	0.171219	0.470847	0.9712	0.83	0.8033	0.7	0.8767
TCGA-DM-A1HA-01A-11D-A153-05	COAD	82	Cancer	0.930739	25992	0.541549	0.707815	140.187	0.367754	0.599184	0.9825	0.97	0.8541	0.95	0.925
TCGA-3L-AA1B-01A-11D-A36Y-05	COAD	61	Cancer	0.631605	17559.8	0.346943	0.473058	120.719	0.201513	0.450116	0.9025		0.6238	0.7	0.7913
TCGA-D5-6898-01A-11D-1926-05	COAD	51	Cancer	0.689449	11646	0.246823	0.42948	120.321	0.333879	0.567061	0.8272	0.58	0.6413	0.675	0.7443
TCGA-DM-A1DA-01A-11D-A153-05	COAD	71	Cancer	0.904487	28804.3	0.568265	0.735567	164.443	0.505074	0.763659	0.9639	0.92	0.808	0.75	0.8875
TCGA-A6-2679-11A-01D-1551-05	COAD	73	Normal	0.387679	7464.22	0.165142	0.349446	96.1584	0.0998411	0.361337
TCGA-AM-5820-01A-01D-1651-05	COAD	59	Cancer	0.706238	13284.2	0.285094	0.457091	125.781	0.34691	0.577351	0.921	0.77	0.8054	0.8	0.8495
TCGA-AA-3509-11A-01D-1407-05	COAD	54	Normal	0.210968	2411.44	0.0706813	0.204759	91.3708	0.0475385	0.232765
TCGA-AA-3509-01A-01D-1407-05	COAD	54	Cancer	0.782422	18174	0.364709	0.493805	127.489	0.208705	0.526684	0.8848	0.81	0.6803	0.75	0.8674
TCGA-A6-6137-01A-11D-1772-05	COAD	55	Cancer	0.694821	14099.1	0.282816	0.469899	120.812	0.281002	0.538043	0.8932	0.3	0.7052	0.725	0.6883
TCGA-NH-A6GA-01A-11D-A36Y-05	COAD	58	Cancer	0.747335	19285.1	0.369044	0.541413	133.607	0.273106	0.509715	0.9305		0.8057	0.8	0.8064
TCGA-A6-A565-01A-31D-A28O-05	COAD	34	Cancer	0.431986	7444.89	0.153976	0.303781	106.979	0.0873481	0.295763	0.7185		0.5829	0.65	0.5864
TCGA-A6-2677-01A-01D-A27A-05	COAD	68	Cancer	0.878102	18423.4	0.400482	0.591047	133.991	0.37321	0.621912		0.93	0.8742	0.85	0.8869
TCGA-CM-6163-01A-11D-1651-05	COAD	74	Cancer	0.654224	14546.5	0.301662	0.455437	117.909	0.16879	0.447071	0.8208	0.47	0.7044	0.65	0.717
TCGA-D5-6932-01A-11D-1926-05	COAD	69	Cancer	0.722494	13345.6	0.299374	0.485865	100.229	0.262083	0.516777	0.8657	0.63	0.5818	0.775	0.7758
TCGA-CM-4752-01A-01D-1407-05	COAD	58	Cancer	0.589072	10532.2	0.227496	0.382977	95.7383	0.297067	0.520915		0.42	0.6209	0.75	0.5893
TCGA-G4-6303-01A-11D-1772-05	COAD	54	Cancer	0.789923	16453.6	0.347054	0.533418	121.94	0.244686	0.506614	0.8767	0.68	0.8365	0.8	0.8252
TCGA-CM-6167-01A-11D-1651-05	COAD	57	Cancer	0.464971	9548.98	0.202614	0.320245	95.9015	0.11162	0.338958	0.6777	0.25	0.6438	0.7	0.5728
TCGA-A6-2672-01B-03D-2299-05	COAD	82	Cancer	0.733016	20993.3	0.461418	0.595519	140.574	0.269364	0.491674
TCGA-AA-3492-01A-01D-1407-05	COAD	90	Cancer	0.829694	25399.9	0.562179	0.650121	144.874	0.287593	0.579077	0.8819	0.82	0.8096	0.725	0.8306
TCGA-CM-6161-01A-11D-1651-05	COAD	36	Cancer	0.704947	15458.4	0.303507	0.518895	120.513	0.326891	0.552267	0.8613	0.66	0.778	0.8	0.8054
TCGA-A6-2682-01A-01D-1407-05	COAD	70	Cancer	0.601483	10326.6	0.212616	0.376234	107.857	0.262386	0.474322	0.8396		0.6202	0.725	0.7927
TCGA-CM-5864-01A-01D-1651-05	COAD	60	Cancer	0.837629	21573.6	0.401094	0.60026	139.99	0.431441	0.613764	0.9308	0.75	0.7853	0.8	0.874
TCGA-G4-6306-01A-11D-1772-05	COAD	71	Cancer	0.782657	20089.2	0.370678	0.539481	117.685	0.34438	0.596759	0.9687	0.74	0.7942	0.8	0.8287
TCGA-D5-6538-01A-11D-1721-05	COAD	79	Cancer	0.938287	28253.7	0.551295	0.729033	139.551	0.342295	0.591113	0.9839	0.92	0.901	0.78	0.9535
TCGA-A6-6140-01A-11D-1772-05	COAD	62	Cancer	0.756052	10708.2	0.234985	0.474543	98.3492	0.202686	0.455427	0.9463	0.81	0.8337	0.775	0.8851
TCGA-D5-6537-01A-11D-1721-05	COAD	64	Cancer	0.770562	19056.3	0.360603	0.505097	129.037	0.387402	0.575601	0.9619	0.81	0.8194	0.85	0.8767
TCGA-DM-A28C-01A-11D-A16X-05	COAD	74	Cancer	0.80685	16009.5	0.346001	0.557948	110.327	0.188951	0.44957	0.9766	0.87	0.8821	0.8	0.9374
TCGA-DM-A28M-01A-12D-A16X-05	COAD	63	Cancer	0.807882	20998.5	0.419675	0.534878	135.252	0.349851	0.609273	0.9807	0.76	0.7957	0.6	0.8391
TCGA-G4-6310-01A-11D-1721-05	COAD	69	Cancer	0.649897	13686.9	0.280539	0.444126	116.126	0.189349	0.451591	0.9473	0.55	0.9103	0.8	0.8603
TCGA-D5-5541-01A-01D-1651-05	COAD	63	Cancer	0.712997	11420.4	0.243956	0.437193	101.114	0.284942	0.562614	0.8364	0.61	0.8638	0.8	0.7648
TCGA-D5-6534-01A-21D-1926-05	COAD	62	Cancer	0.516167	14041.6	0.293449	0.400019	107.882	0.135033	0.398364	0.4894	0.34	0.6258	0.8	0.5402
TCGA-G4-6315-01A-11D-1721-05	COAD	66	Cancer	0.650222	13548.2	0.276236	0.458553	110.541	0.193891	0.438146	0.9798	0.37	0.8251	0.76	0.8102
TCGA-AA-3712-01A-21D-1721-05	COAD	65	Cancer	0.704422	15411.8	0.268526	0.461081	125.799	0.288776	0.556057	0.8715	0.66	0.7867	0.825	0.7887
TCGA-A6-5660-01A-01D-1651-05	COAD	73	Cancer	0.793166	19609.9	0.427804	0.555916	128.323	0.393748	0.596226	0.8908		0.8516	0.85	0.8604
TCGA-CM-5868-01A-01D-1651-05	COAD	59	Cancer	0.643476	11018.1	0.220155	0.41942	113.672	0.299378	0.54705	0.9042	0.5	0.7746	0.73	0.7415
TCGA-AA-3697-01A-01D-1721-05	COAD	77	Cancer	0.739419	17037.7	0.312603	0.497552	111.463	0.326246	0.620753	0.9038	0.67	0.7639	0.725	0.8171
TCGA-AA-3697-11A-01D-1721-05	COAD	77	Normal	0.337191	5464.83	0.12856	0.296938	94.0409	0.0616393	0.265833
TCGA-A6-2684-01A-01D-A27A-05	COAD	75	Cancer	0.636548	16439.9	0.313855	0.465278	118.014	0.210469	0.504713	0.7705	0.64	0.713	0.7058	0.725
TCGA-DM-A28K-01A-21D-A16X-05	COAD	75	Cancer	0.851174	22065.5	0.434938	0.605454	136.106	0.30299	0.518932	0.9606	0.9	0.7345	0.75	0.8406
TCGA-A6-6142-01A-11D-1772-05	COAD	56	Cancer	0.582891	5380.72	0.127006	0.31238	110.665	0.304578	0.469948	0.7844	0.45	0.6622	0.775	0.6378
TCGA-AA-3506-01A-01D-1407-05	COAD	77	Cancer	0.705122	18147.5	0.359557	0.520042	129.899	0.360832	0.610786	0.8641	0.64	0.7229	0.725	0.7979
TCGA-CM-5860-01A-01D-1651-05	COAD	44	Cancer	0.703392	21377.6	0.413562	0.534499	129.631	0.336615	0.60263	0.787	0.56	0.7767	0.75	0.7451
TCGA-AZ-5407-01A-01D-1721-05	COAD	51	Cancer	0.745633	21977.3	0.432738	0.603455	141.941	0.311316	0.618066	0.938	0.77	0.7059	0.75	0.8533
TCGA-NH-A6GB-01A-11D-A36Y-05	COAD	71	Cancer	0.749984	20720.5	0.37921	0.569564	134.69	0.408787	0.586509	0.9031		0.6056	0.7	0.7019
TCGA-AY-A69D-01A-11D-A36Y-05	COAD	55	Cancer	0.757575	18545.5	0.381045	0.537179	124.664	0.155134	0.338184	0.9468		0.7585	0.6	0.751
TCGA-CA-5256-01A-01D-1407-05	COAD	54	Cancer	0.759301	15047.1	0.322771	0.528676	115.659	0.307213	0.592495	0.9154	0.67	0.7816	0.8	0.8469
TCGA-T9-A92H-01A-11D-A36Y-05	COAD	82	Cancer	0.797103	18175.8	0.343725	0.52304	102.844	0.2654	0.553938	0.9673		0.8205	0.65	0.8238
TCGA-4N-A93T-01A-11D-A36Y-05	COAD	67	Cancer	0.809938	18650.1	0.334909	0.562863	117.606	0.261507	0.584658	0.9752		0.7915	0.75	0.7898
TCGA-F4-6459-01A-11D-1772-05	COAD	61	Cancer	0.685674	14430.2	0.284306	0.471389	105.87	0.179187	0.419514	0.8241	0.46	0.909	0.8	0.7145
TCGA-A6-6138-01A-11D-1772-05	COAD	61	Cancer	0.689345	18407.2	0.365458	0.529629	118.174	0.226998	0.494843	0.7306	0.62	0.6837	0.7	0.7069
TCGA-G4-6317-01A-11D-1721-05	COAD	51	Cancer	0.75383	12829.5	0.263328	0.448599	127.654	0.267158	0.571141	0.99	0.76	0.8938	0.7	0.8967
TCGA-AA-3510-01A-01D-1407-05	COAD	70	Cancer	0.67323	16274.3	0.309268	0.457564	122.99	0.205033	0.482474			0.7471	0.75	0.8091
TCGA-AA-3663-11A-01D-1721-05	COAD	42	Normal	0.2169	1938.34	0.0655327	0.187463	91.0033	0.0563816	0.233276
TCGA-D5-5537-01A-21D-1926-05	COAD	83	Cancer	0.770683	22402.1	0.435397	0.559869	126.15	0.278914	0.549841	0.9103	0.71	0.7975	0.65	0.8361
TCGA-A6-2675-11A-01D-1721-05	COAD	78	Normal	0.33911	4501.99	0.112536	0.252045	95.6399	0.0948551	0.247254
TCGA-AA-3495-11A-01D-1407-05	COAD	79	Normal	0.415528	6566.12	0.152097	0.336356	94.4467	0.0667338	0.272395
TCGA-CM-4747-01A-01D-1407-05	COAD	47	Cancer	0.705495	18922.1	0.375275	0.521605	117.256	0.209162	0.485624	0.9176	0.59	0.7792	0.75	0.7833
TCGA-D5-6923-01A-11D-1926-05	COAD	57	Cancer	0.631794	10176.6	0.228366	0.374295	117.085	0.14407	0.408528	0.8442	0.64	0.6964	0.8	0.7805
TCGA-NH-A50T-01A-11D-A28O-05	COAD	68	Cancer	0.839987	17769.4	0.363804	0.580511	100.434	0.397361	0.634207	0.9744		0.8381	0.9	0.9101
TCGA-QG-A5Z1-01A-11D-A28O-05	COAD	71	Cancer	0.806413	21927.6	0.410293	0.561717	132.697	0.212321	0.462011	0.9059		0.8914	0.65	0.8827
TCGA-CM-5863-01A-21D-1837-05	COAD	60	Cancer	0.562041	15342.8	0.298089	0.433939	115.739	0.198716	0.440118	0.8391	0.89	0.6313	0.5	0.792
TCGA-G4-6311-01A-11D-1721-05	COAD	80	Cancer	0.59315	12651.8	0.25881	0.437325	119.843	0.250362	0.481298	0.8414	0.42	0.7015	0.725	0.7042
TCGA-D5-5540-01A-01D-1651-05	COAD	73	Cancer	0.881884	22106.4	0.447339	0.582758	105.909	0.216238	0.435531	0.9401	0.89	0.925	0.8	0.9467
TCGA-AA-3492-11A-01D-1407-05	COAD	90	Normal	0.407761	6457.19	0.153052	0.3379	94.9924	0.0699102	0.275795
TCGA-DM-A28G-01A-11D-A16X-05	COAD	75	Cancer	0.754596	20894.4	0.411995	0.562231	127.301	0.367995	0.583327	0.9597	0.99	0.7802	0.75	0.9182
TCGA-G4-6628-01A-11D-1837-05	COAD	78	Cancer	0.643239	19769.3	0.431133	0.534441	130.079	0.2814	0.509624	0.7433	0.56	0.6475	0.75	0.6779
TCGA-A6-A567-01A-31D-A28O-05	COAD	56	Cancer	0.679226	10252.7	0.195064	0.411154	103.306	0.295685	0.533137	0.938		0.7938	0.65	0.8594
TCGA-G4-6295-11A-01D-1721-05	COAD	70	Normal	0.455015	6646.98	0.153888	0.346199	96.6842	0.117664	0.349222
TCGA-CM-6168-01A-11D-1651-05	COAD	84	Cancer	0.556505	14227.5	0.281665	0.421257	112.624	0.168198	0.391895	0.7102	0.35	0.6592	0.7	0.6256
TCGA-SS-A7HO-01A-21D-A36Y-05	COAD	44	Cancer	0.838985	16296.4	0.313364	0.556513	136.313	0.492432	0.672274	0.9817		0.7375	0.7	0.7578
TCGA-AU-3779-01A-01D-1721-05	COAD	80	Cancer	0.665682	11618.7	0.256217	0.419984	116.367	0.185619	0.46804	0.8145	0.62	0.7163	0.675	0.7508
TCGA-CM-6162-01A-11D-1651-05	COAD	48	Cancer	0.467252	3589.5	0.0928642	0.265126	95.0299	0.171754	0.402291	0.5751	0.49	0.6202	0.76	0.5884
TCGA-AY-6196-01A-11D-1721-05	COAD	47	Cancer	0.554412	13138	0.25179	0.38449	101.697	0.183858	0.422192	0.3793	0.38	0.5515	0.74	0.5077
TCGA-AZ-6606-01A-11D-1837-05	COAD	81	Cancer	0.80034	25670.2	0.53743	0.635739	134.861	0.153677	0.382376	0.9639	0.8	0.8371	0.8	0.8824
TCGA-5M-AAT4-01A-11D-A40X-05	COAD	74	Cancer	0.714916	19218.6	0.372538	0.53791	128.691	0.283286	0.591367	0.972			0.7	0.8372
TCGA-NH-A50U-01A-33D-A36Y-05	COAD	42	Cancer	0.82736	19639.4	0.366173	0.532184	140.894	0.426004	0.708399	0.9268		0.7436	0.6	0.7334
TCGA-AA-3496-01A-21D-1837-05	COAD	83	Cancer	0.723779	17920.7	0.358734	0.519412	132.938	0.295065	0.476924	0.762	0.74	0.7266	0.75	0.7004
TCGA-DM-A1D9-01A-11D-A153-05	COAD	67	Cancer	0.748602	16772.9	0.334672	0.541862	136.193	0.365033	0.583193	0.9628	0.81	0.8399	0.75	0.8888
TCGA-AY-A71X-01A-12D-A36Y-05	COAD	54	Cancer	0.908171	24228.3	0.478075	0.687061	144.217	0.365748	0.585879	0.993		0.8363	0.9	0.8424
TCGA-A6-5667-01A-21D-1721-05	COAD	40	Cancer	0.696077	12036.9	0.264661	0.419233	119.358	0.224684	0.517753	0.9105	0.68	0.8568	0.6	0.8666
TCGA-5M-AATA-01A-31D-A40X-05	COAD		Cancer	0.634148	13853.2	0.291432	0.450684	118.945	0.173453	0.405903	0.9035			0.6	0.8795
TCGA-CA-5254-01A-21D-1837-05	COAD	42	Cancer	0.80121	25284.1	0.525217	0.630324	126.061	0.344395	0.65032	0.9048	0.71	0.6113	0.75	0.7914
TCGA-AY-A8YK-01A-11D-A40X-05	COAD	44	Cancer	0.557503	7222.73	0.14311	0.33906	99.0122	0.270669	0.553846	0.9477			0.75	0.9395
TCGA-DM-A1D6-01A-21D-A153-05	COAD	88	Cancer	0.828304	19450.1	0.351558	0.562864	124.321	0.183276	0.399628	0.9861	0.9	0.9304	0.6	0.9916
TCGA-G4-6307-01A-11D-1721-05	COAD	37	Cancer	0.661909	7873.6	0.159643	0.364031	115.754	0.266936	0.584576	0.9759	0.7	0.8367	0.8	0.8348
TCGA-CK-4947-01B-11D-1651-05	COAD	46	Cancer	0.637462	18130.1	0.361319	0.523673	129.198	0.35633	0.593292	0.8189	0.59	0.6208	0.8	0.7223
TCGA-G4-6627-01A-11D-1772-05	COAD	84	Cancer	0.512361	13983.3	0.281688	0.420545	107.218	0.145799	0.382278	0.7862		0.6144	0.375	0.6509
TCGA-F4-6854-01A-11D-1926-05	COAD	77	Cancer	0.682768	15582.2	0.325066	0.485183	122.943	0.213825	0.511113	0.874	0.66	0.7149	0.8	0.79
TCGA-AA-3510-11A-01D-1407-05	COAD	70	Normal	0.351781	6267.08	0.144396	0.323006	93.9737	0.0737911	0.299948
TCGA-CK-4952-01A-01D-1721-05	COAD	48	Cancer	0.831047	23241.7	0.478011	0.589471	156.398	0.510313	0.705448	0.9292	0.85	0.7267	0.525	0.8372
TCGA-AZ-6598-01A-11D-1772-05	COAD	77	Cancer	0.865577	27447.3	0.603706	0.675353	148.029	0.18848	0.50224	0.8714	0.85	0.8613	0.8	0.8718
TCGA-CK-5912-01A-11D-1651-05	COAD	81	Cancer	0.792197	10971.4	0.235078	0.447833	102.627	0.377038	0.616701	0.9244	0.78	0.7562	0.8	0.9025
TCGA-DM-A28F-01A-11D-A16X-05	COAD	73	Cancer	0.760341	16435.4	0.332742	0.550853	126.425	0.456129	0.64323	0.9587	0.7	0.689	0.8	0.7866
TCGA-A6-6654-01A-21D-1837-05	COAD	65	Cancer	0.558454	14135.3	0.280547	0.406743	108.881	0.149934	0.373038	0.5848	0.32	0.6069	0.7	0.5196
TCGA-AD-6964-01A-11D-1926-05	COAD	58	Cancer	0.497365	8879.84	0.161287	0.351273	101.135	0.248434	0.486899	0.6166	0.51	0.7744	0.6	0.6854
TCGA-F4-6855-01A-11D-1926-05	COAD	70	Cancer	0.690855	17423.2	0.345282	0.499646	130.36	0.23617	0.499828	0.7754	0.65	0.6607	0.775	0.726
TCGA-CA-6719-01A-11D-1837-05	COAD	77	Cancer	0.740688	19482.9	0.406018	0.545876	129.068	0.311373	0.607208	0.814	0.57	0.7712	0.75	0.7307
TCGA-G4-6293-01A-11D-1721-05	COAD	49	Cancer	0.633385	16655.5	0.336715	0.490755	116.786	0.360129	0.587278	0.8604	0.6	0.6079	0.8	0.7764
TCGA-CM-4744-01A-01D-1407-05	COAD	69	Cancer	0.713251	21267.2	0.447014	0.568965	136.354	0.458069	0.648278	0.9146	0.81	0.6355	0.75	0.7982
TCGA-A6-2682-11A-01D-1551-05	COAD	70	Normal	0.383583	7208.08	0.158785	0.352516	96.3352	0.072214	0.282147
TCGA-AD-6890-01A-11D-1926-05	COAD	65	Cancer	0.702735	14165.2	0.284951	0.455604	107.73	0.246629	0.531922	0.9084	0.6	0.6504	0.8	0.7392
TCGA-G4-6295-01A-11D-1721-05	COAD	70	Cancer	0.640652	8683.74	0.186187	0.346477	120.218	0.479565	0.687345	0.8722	0.69	0.5958	0.775	0.8042
TCGA-A6-6781-01A-22D-1926-05	COAD	43	Cancer	0.56025	11442	0.232353	0.416492	111.847	0.140225	0.318883	0.5951	0.46	0.7003	0.6558	0.7
TCGA-FA-A4XK-01A-11D-A31Y-05	DLBC	40	Cancer	0.807323	28000.8	0.582105	0.709088	134.791	0.538843	0.80226
TCGA-FF-8062-01A-11D-2211-05	DLBC	60	Cancer	0.60009	20453.7	0.447764	0.549003	119.372	0.244016	0.578879
TCGA-GR-A4D5-01A-11D-A31Y-05	DLBC	46	Cancer	0.457645	14264.9	0.30168	0.385343	103.327	0.112253	0.349108
TCGA-FF-8041-01A-11D-2211-05	DLBC	28	Cancer	0.738065	22346.8	0.43864	0.630921	125.122	0.194334	0.518817
TCGA-FA-A82F-01A-11D-A383-05	DLBC	48	Cancer	0.746632	24580.9	0.519754	0.660935	127.244	0.358992	0.67727
TCGA-FF-A7CX-01A-12D-A383-05	DLBC	46	Cancer	0.93978	34819.9	0.763971	0.874354	154.636	0.287319	0.690581
TCGA-GS-A9TW-01A-11D-A383-05	DLBC	23	Cancer	0.696856	22009.3	0.461652	0.588913	111.174	0.274062	0.581505
TCGA-FA-A86F-01A-11D-A383-05	DLBC	64	Cancer	0.54446	18215.5	0.391704	0.483794	121.611	0.150009	0.43959
TCGA-FF-A7CW-01A-11D-A383-05	DLBC	72	Cancer	0.619041	19729.9	0.409826	0.572359	128.237	0.236046	0.58449
TCGA-FM-8000-01A-11D-2211-05	DLBC	70	Cancer	0.835971	27191.6	0.581663	0.759114	144.287	0.461089	0.80725
[truncated: 7,068 more rows]

## Sheet: SuppData3
Supplementary Data 3: SampleID, normal tissue-type, age group and mitotic age estimates of 7 mitotic clocks for eGTEX samples
SampleID	TissueType	Age	stemTOC	epiTOC2	epiTOC1	EpiCMIT_hyper	RepliTali	HypoClock	EpiCMIT_hypo
GTEX-11EM3-1326-SM-GW24C	Breast-Mammary	20-29	0.131555	483.092	0.0408866	0.150045	-2.22399	0.0737143	0.239799
GTEX-11EMC-2026-SM-GW242	Breast-Mammary	60-69	0.117186	743.997	0.0451958	0.184407	2.3818	0.0665217	0.231122
GTEX-11GSP-0926-SM-GW21X	Breast-Mammary	60-69	0.304072	2412.14	0.0785055	0.297566	7.03954	0.0660991	0.220118
GTEX-13D11-1026-SM-GW1D7	Breast-Mammary	50-59	0.175406	1347.54	0.0554911	0.201674	-0.864514	0.0670614	0.240269
GTEX-13PL6-2926-SM-GW1SN	Breast-Mammary	40-49	0.130508	1353.52	0.0562103	0.185355	3.08129	0.0838822	0.263333
GTEX-147F3-1626-SM-GW1DU	Breast-Mammary	50-59	0.120525	398.545	0.0381582	0.14916	0.297186	0.0635433	0.22768
GTEX-14BIL-2526-SM-GW1SZ	Breast-Mammary	50-59	0.0932487	429.619	0.0396173	0.142265	-3.46568	0.0610086	0.215905
GTEX-14BIN-1826-SM-GW1X6	Breast-Mammary	50-59	0.161255	989.708	0.0494605	0.204998	-3.72081	0.0633061	0.213017
GTEX-14E6C-1326-SM-GW1D1	Breast-Mammary	40-49	0.0772481	108.081	0.0326746	0.113448	-5.72294	0.0503068	0.202556
GTEX-14H4A-2526-SM-GW1GY	Breast-Mammary	40-49	0.204766	2219.15	0.0738685	0.236852	0.410957	0.0716724	0.242236
GTEX-14PHY-1926-SM-GW2A6	Breast-Mammary	60-69	0.155762	1207.09	0.0546102	0.186123	0.982387	0.0636797	0.222527
GTEX-14PJ6-2026-SM-GW1R5	Breast-Mammary	60-69	0.279041	3906.96	0.101273	0.297983	13.1257	0.0828918	0.249595
GTEX-14PK6-1526-SM-GW21C	Breast-Mammary	70-79	0.0951453	252.896	0.0355829	0.136183	-7.42109	0.0612302	0.206462
GTEX-15CHQ-0426-SM-GW1QF	Breast-Mammary	60-69	0.153921	882.317	0.0461975	0.155746	4.28532	0.095603	0.292755
GTEX-15CHR-1026-SM-GW218	Breast-Mammary	50-59	0.0737698	-64.0482	0.0293883	0.113246	1.03974	0.0824068	0.262423
GTEX-15DDE-0726-SM-GW1RC	Breast-Mammary	50-59	0.112468	726.544	0.0458285	0.184157	-1.2007	0.0699275	0.236486
GTEX-15ER7-1626-SM-GW1VP	Breast-Mammary	20-29	0.23443	2238.78	0.0730416	0.237028	0.648759	0.0778061	0.258009
GTEX-15EU6-2426-SM-GW1RL	Breast-Mammary	50-59	0.0738136	131.683	0.0315819	0.113532	-6.36173	0.0496116	0.211184
GTEX-15SHU-0826-SM-GW21B	Breast-Mammary	40-49	0.0761297	-131.427	0.0291023	0.137032	-7.54203	0.0602076	0.208903
GTEX-16NGA-0826-SM-GW1UD	Breast-Mammary	40-49	0.112254	839.84	0.0455582	0.171904	0.0194967	0.0637495	0.230237
GTEX-17HG3-0126-SM-GW1R6	Breast-Mammary	30-39	0.130861	1032.67	0.0507471	0.177185	1.89587	0.0717643	0.245186
GTEX-18D9U-2326-SM-GW1S1	Breast-Mammary	40-49	0.0555156	-310.407	0.025218	0.0915561	-9.46094	0.0539198	0.202965
GTEX-18QFQ-0826-SM-GW1CA	Breast-Mammary	30-39	0.0843384	7.8786	0.0312585	0.109384	-5.33765	0.04882	0.211406
GTEX-1AYD5-2526-SM-GW1DB	Breast-Mammary	50-59	0.0985805	438.55	0.0398996	0.119713	-5.0539	0.0544824	0.207917
GTEX-1C6WA-2426-SM-GW1RG	Breast-Mammary	60-69	0.104344	557.266	0.037951	0.13939	-2.59124	0.052608	0.21893
GTEX-1F5PL-1026-SM-GW1AX	Breast-Mammary	40-49	0.131485	1270.5	0.0517362	0.180063	-1.40194	0.0704336	0.227864
GTEX-1F88E-0326-SM-GW1CC	Breast-Mammary	60-69	0.0873481	507.462	0.0415371	0.162592	-3.82341	0.0700153	0.229513
GTEX-1GMR3-2626-SM-GW1E8	Breast-Mammary	40-49	0.151079	1303.47	0.0534261	0.158255	-1.55986	0.0545109	0.23353
GTEX-1GN1W-1926-SM-GW1DD	Breast-Mammary	50-59	0.147431	1732.66	0.0591701	0.193209	-2.68279	0.0666137	0.223957
GTEX-1GPI6-0626-SM-GW1S3	Breast-Mammary	60-69	0.0949916	67.9863	0.0318478	0.110004	-4.00614	0.0556847	0.211442
GTEX-1GTWX-2826-SM-GW1E9	Breast-Mammary	60-69	0.127776	596.852	0.0416829	0.154633	-5.59565	0.0464543	0.198753
GTEX-1GZ2Q-2626-SM-GW1PZ	Breast-Mammary	40-49	0.0742284	137.804	0.0336291	0.11076	5.87218	0.127959	0.32361
GTEX-1GZ4H-0326-SM-GW1RT	Breast-Mammary	50-59	0.150186	1484.56	0.0585303	0.195338	-0.302296	0.0782168	0.257018
GTEX-1H3VE-2226-SM-GW1S4	Breast-Mammary	40-49	0.0625785	-60.2589	0.0291536	0.104656	-3.05628	0.0617788	0.224662
GTEX-1IDJE-0826-SM-GW1GS	Breast-Mammary	50-59	0.114886	850.581	0.0484052	0.207876	-5.23139	0.0614462	0.210653
GTEX-1IKOH-2326-SM-GW1T3	Breast-Mammary	60-69	0.153003	1168.02	0.0522366	0.187443	-3.11143	0.0652631	0.227865
GTEX-S341-1526-SM-GW24F	Breast-Mammary	40-49	0.176428	1414.52	0.059516	0.214724	-3.1585	0.0692739	0.225626
GTEX-S4P3-1326-SM-GW2AH	Breast-Mammary	50-59	0.136147	548.553	0.0409964	0.184375	-3.04781	0.0704098	0.23962
GTEX-SE5C-2126-SM-GW1G8	Breast-Mammary	40-49	0.0951209	469.033	0.0397253	0.158395	0.0903639	0.0805264	0.26857
GTEX-T6MO-0326-SM-GW1ZU	Breast-Mammary	40-49	0.145012	989.129	0.0500808	0.191487	-1.6924	0.0697527	0.243705
GTEX-U3ZN-1926-SM-GW1U4	Breast-Mammary	30-39	0.101686	448.866	0.0400013	0.157819	-5.55141	0.061718	0.214083
GTEX-UJHI-1426-SM-GW1SO	Breast-Mammary	50-59	0.167447	1557.25	0.0614828	0.205859	-0.0127528	0.0845351	0.254585
GTEX-WI4N-1426-SM-GW1FZ	Breast-Mammary	40-49	0.113492	492.952	0.0402042	0.144184	-0.184481	0.0617772	0.216175
GTEX-WRHU-0326-SM-GW1U1	Breast-Mammary	50-59	0.256198	2099.37	0.0698417	0.246214	6.79289	0.0800175	0.261049
GTEX-X15G-1626-SM-GW1D9	Breast-Mammary	50-59	0.106899	477.42	0.04006	0.159233	-1.30793	0.0678727	0.225744
GTEX-X8HC-0826-SM-GW2B2	Breast-Mammary	50-59	0.139071	756.879	0.0462928	0.167414	0.514367	0.0667064	0.230989
GTEX-XUW1-2326-SM-GW2AA	Breast-Mammary	50-59	0.131688	779.035	0.0471641	0.165495	-1.06069	0.0735358	0.249427
GTEX-XUZC-1626-SM-GW1CI	Breast-Mammary	30-39	0.184066	2581.59	0.0786876	0.219942	7.00504	0.0712865	0.251243
GTEX-XV7Q-2326-SM-GW1VQ	Breast-Mammary	40-49	0.132996	632.701	0.0441481	0.152541	-1.64712	0.0672811	0.241408
GTEX-YFC4-1426-SM-GW1SR	Breast-Mammary	40-49	0.116375	906.458	0.0479248	0.209425	-2.86531	0.0725968	0.232617
GTEX-ZC5H-2626-SM-GW1G6	Breast-Mammary	40-49	0.137832	1212.88	0.0553172	0.211982	0.858732	0.0680695	0.238079
GTEX-ZXES-0826-SM-GW2BT	Breast-Mammary	30-39	0.116276	112.902	0.0343166	0.170411	-1.0564	0.0714367	0.225762
GTEX-1117F-2726-SM-GW1F9	Colon-Transverse	60-69	0.302207	5817.05	0.134041	0.28061	2.50113	0.0603747	0.263814
GTEX-111FC-2326-SM-GW2AK	Colon-Transverse	60-69	0.308124	5823.23	0.133006	0.273981	8.1682	0.0683575	0.274096
GTEX-111VG-2226-SM-GW1XW	Colon-Transverse	60-69	0.149489	1307.76	0.0511323	0.157763	-13.0298	0.0375223	0.186949
GTEX-111YS-1626-SM-GW23H	Colon-Transverse	60-69	0.448267	4845.12	0.122452	0.318775	15.7906	0.0679494	0.247434
GTEX-113JC-1826-SM-GW29S	Colon-Transverse	50-59	0.23666	2673.22	0.0789743	0.199902	2.85075	0.0612278	0.253559
GTEX-1192W-1826-SM-GW248	Colon-Transverse	60-69	0.470145	10029.6	0.212782	0.407699	21.1165	0.076909	0.291472
GTEX-1192X-2626-SM-GW1EK	Colon-Transverse	50-59	0.359876	6100.97	0.14514	0.306367	7.35465	0.0663068	0.253761
GTEX-11DXX-1826-SM-GW1UB	Colon-Transverse	60-69	0.488619	6218.18	0.147562	0.328552	20.7044	0.0750238	0.268129
GTEX-11DXZ-1726-SM-GW1EW	Colon-Transverse	50-59	0.39204	6785.38	0.152527	0.339253	20.8781	0.0799387	0.305761
GTEX-11EM3-1526-SM-GW249	Colon-Transverse	20-29	0.231744	2491.38	0.076523	0.187076	12.5793	0.0644251	0.251887
GTEX-11EMC-1526-SM-GW23O	Colon-Transverse	60-69	0.410228	5263.88	0.127089	0.321932	13.8973	0.0669378	0.26937
GTEX-11GS4-1926-SM-GW2CA	Colon-Transverse	60-69	0.376324	6686.67	0.148094	0.312744	14.123	0.0655458	0.28706
GTEX-11I78-1226-SM-GW192	Colon-Transverse	50-59	0.281644	3878.73	0.102945	0.249226	11.2845	0.0677035	0.259595
GTEX-11ONC-2026-SM-GW1YJ	Colon-Transverse	60-69	0.32902	5935.31	0.13393	0.291047	9.39491	0.0726674	0.295634
GTEX-11P82-1026-SM-GW1XX	Colon-Transverse	20-29	0.230608	3063.88	0.0837188	0.204339	12.7751	0.066005	0.273929
GTEX-11TT1-1026-SM-GW1AF	Colon-Transverse	20-29	0.22327	2512.84	0.075657	0.195702	6.78074	0.0603832	0.256532
GTEX-11TTK-2426-SM-GW24B	Colon-Transverse	60-69	0.166884	1122.51	0.0492312	0.158733	-10.077	0.0371424	0.199607
GTEX-11UD2-2426-SM-GW1BM	Colon-Transverse	50-59	0.160721	1070.36	0.0522727	0.13616	-12.4435	0.0509077	0.181324
GTEX-11WQC-2126-SM-GW1Z4	Colon-Transverse	60-69	0.420903	8943.45	0.193839	0.369538	20.1238	0.0840095	0.304493
GTEX-11ZTS-1726-SM-GW2BJ	Colon-Transverse	60-69	0.461811	10037.6	0.212645	0.410354	28.3177	0.117432	0.370055
GTEX-11ZTT-1326-SM-GW19N	Colon-Transverse	60-69	0.450521	8353.87	0.17979	0.339264	18.8015	0.0782632	0.246297
GTEX-11ZU8-2226-SM-GW2B5	Colon-Transverse	60-69	0.370693	8107.44	0.172904	0.335766	8.05587	0.0729926	0.281463
GTEX-11ZUS-2226-SM-GW1Z3	Colon-Transverse	30-39	0.334659	7669.32	0.164624	0.310226	8.02573	0.0643522	0.273341
GTEX-1211K-1726-SM-GW1U8	Colon-Transverse	60-69	0.3842	5496.12	0.133341	0.3136	20.5738	0.0806715	0.294688
GTEX-12584-2626-SM-GW1ZC	Colon-Transverse	40-49	0.377911	9743.7	0.195044	0.323918	12.4878	0.0811298	0.307158
GTEX-12696-2126-SM-GW1BJ	Colon-Transverse	60-69	0.375342	6215.2	0.140426	0.317307	17.5154	0.0672292	0.286046
GTEX-12KS4-2426-SM-GW1BA	Colon-Transverse	30-39	0.260165	3133.51	0.0858319	0.216829	3.00196	0.0614045	0.253074
GTEX-12WSE-2626-SM-GW1VB	Colon-Transverse	20-29	0.0617102	-219.142	0.0278745	0.086462	-16.2097	0.0401529	0.175949
GTEX-12WSF-2826-SM-GW1FS	Colon-Transverse	70-79	0.0810215	758.91	0.041458	0.118204	-13.8063	0.0415313	0.178225
GTEX-12WSI-1626-SM-GW1AC	Colon-Transverse	50-59	0.304588	5352.19	0.126309	0.280404	11.6926	0.072396	0.287955
GTEX-12ZZW-2526-SM-GW1AB	Colon-Transverse	50-59	0.29194	4683.11	0.11481	0.251418	1.11066	0.062276	0.24333
GTEX-12ZZX-2626-SM-GW2BU	Colon-Transverse	40-49	0.284291	4482.81	0.110594	0.249807	5.53423	0.0640027	0.282803
GTEX-12ZZY-2826-SM-GW29L	Colon-Transverse	60-69	0.266322	3643.7	0.0983741	0.243794	9.22853	0.0713302	0.2868
GTEX-12ZZZ-2426-SM-GW24E	Colon-Transverse	60-69	0.271245	2595.36	0.0766228	0.191371	-10.1902	0.0504946	0.167672
GTEX-13111-0726-SM-GW1Z8	Colon-Transverse	50-59	0.0673666	313.524	0.0347491	0.0989019	-14.6207	0.0396539	0.182076
GTEX-13112-1826-SM-GW1TV	Colon-Transverse	50-59	0.156195	989.944	0.0504563	0.154259	-9.07882	0.0462988	0.183443
GTEX-1399R-2226-SM-GW21Z	Colon-Transverse	30-39	0.322121	3642.88	0.0987875	0.260165	19.8585	0.0773387	0.301343
GTEX-139TT-2026-SM-GW1YB	Colon-Transverse	60-69	0.384072	6632.55	0.152883	0.309786	20.0018	0.0859004	0.306711
GTEX-139YR-2126-SM-GW1G2	Colon-Transverse	50-59	0.354331	5241.28	0.128224	0.304097	17.8282	0.0761699	0.303018
GTEX-13CF2-1926-SM-GW22O	Colon-Transverse	60-69	0.271281	3059.71	0.0872668	0.243851	2.25758	0.058114	0.252051
GTEX-13N1W-2326-SM-GW1FV	Colon-Transverse	70-79	0.436256	11768.7	0.244076	0.391751	13.974	0.0689503	0.287195
GTEX-13NYS-2726-SM-GW1GE	Colon-Transverse	60-69	0.358353	7927.7	0.169949	0.329197	7.72033	0.0673054	0.298992
GTEX-13NZB-1826-SM-GW1AH	Colon-Transverse	30-39	0.320003	6671.99	0.145368	0.29438	7.00058	0.0716307	0.280936
GTEX-13O3P-2326-SM-GW19Y	Colon-Transverse	50-59	0.282085	5659.29	0.133047	0.269407	3.48457	0.066734	0.269548
GTEX-13OW5-2626-SM-GW1SS	Colon-Transverse	60-69	0.259208	3840.02	0.0991389	0.237463	0.0669694	0.04862	0.226139
GTEX-13OW7-2426-SM-GW1Z7	Colon-Transverse	50-59	0.261977	3501.88	0.093782	0.228497	2.6908	0.055497	0.252362
GTEX-13OW8-2626-SM-GW1R9	Colon-Transverse	60-69	0.316789	5304.13	0.118796	0.243712	1.71617	0.0633781	0.261702
GTEX-13PL6-1826-SM-GW243	Colon-Transverse	40-49	0.229204	3079.73	0.0839734	0.211191	1.47106	0.0561302	0.265971
GTEX-13QIC-2726-SM-GW2B8	Colon-Transverse	60-69	0.324252	6358.57	0.141282	0.283695	2.73341	0.0647307	0.260211
GTEX-13QJC-2026-SM-GW23U	Colon-Transverse	60-69	0.316785	5148.17	0.123474	0.284088	3.5769	0.0490719	0.235531
GTEX-13SLW-2726-SM-GW1FX	Colon-Transverse	70-79	0.325055	5455.06	0.123329	0.294882	0.55892	0.0439877	0.224483
GTEX-13SLX-2826-SM-GW1YI	Colon-Transverse	50-59	0.289666	4184.24	0.106589	0.247004	5.08125	0.0626128	0.276916
GTEX-13X6I-2626-SM-GW1U3	Colon-Transverse	60-69	0.351192	6607.01	0.149524	0.310775	14.4474	0.0891656	0.323269
GTEX-145MH-2526-SM-GW19X	Colon-Transverse	50-59	0.334296	6533.19	0.145577	0.292581	5.38947	0.0676419	0.255189
GTEX-1477Z-1826-SM-GW1TG	Colon-Transverse	60-69	0.324386	5243.55	0.124617	0.273957	7.96171	0.0671796	0.293421
GTEX-147GR-2726-SM-GW1TI	Colon-Transverse	60-69	0.366544	6917.31	0.14912	0.322059	13.6269	0.0696157	0.296287
GTEX-14A5I-2626-SM-GW1R2	Colon-Transverse	50-59	0.347913	5308.79	0.127535	0.290529	14.0609	0.0737557	0.278957
GTEX-14A6H-1826-SM-GW1RY	Colon-Transverse	30-39	0.300812	5398.15	0.125065	0.250592	5.18828	0.0621034	0.251867
GTEX-14ABY-2426-SM-GW1UN	Colon-Transverse	50-59	0.268893	4162.63	0.104361	0.244701	2.44403	0.0546137	0.259674
GTEX-14AS3-1126-SM-GW1UG	Colon-Transverse	40-49	0.320031	2851.22	0.0826298	0.220093	6.00674	0.0542136	0.231471
GTEX-14BIM-2426-SM-GW1QP	Colon-Transverse	60-69	0.11457	934.804	0.0479392	0.137115	-12.4818	0.038671	0.193165
GTEX-14BIN-3026-SM-GW1QX	Colon-Transverse	50-59	0.268179	3644.52	0.0951514	0.223201	3.37033	0.0506177	0.231817
GTEX-14BMV-2426-SM-GW1RK	Colon-Transverse	50-59	0.345521	7055.39	0.161269	0.315465	10.0111	0.0701367	0.293191
GTEX-14DAQ-2726-SM-GW1E6	Colon-Transverse	60-69	0.303977	4528.18	0.115378	0.263871	5.75029	0.060094	0.268199
GTEX-14DAR-1526-SM-GW1WG	Colon-Transverse	50-59	0.296578	2631.76	0.0766782	0.227657	11.095	0.0608146	0.259318
GTEX-14E6D-2226-SM-GW1DI	Colon-Transverse	50-59	0.23888	4035.25	0.101429	0.229145	-7.16409	0.0436649	0.214099
GTEX-14E7W-2526-SM-GW1AR	Colon-Transverse	70-79	0.405852	10081.7	0.207031	0.351588	15.9561	0.0752188	0.304807
GTEX-14H4A-1926-SM-GW1DE	Colon-Transverse	40-49	0.0759301	211.67	0.0340692	0.101969	-15.7262	0.0395405	0.171859
GTEX-14LZ3-2726-SM-GW1WK	Colon-Transverse	60-69	0.310874	4498.02	0.112021	0.274721	11.3005	0.0765572	0.275162
GTEX-14PJ4-1926-SM-GW1DO	Colon-Transverse	60-69	0.442058	8504.66	0.185685	0.382171	22.7533	0.0819725	0.308796
GTEX-14PJM-2626-SM-GW1RJ	Colon-Transverse	50-59	0.233825	3539.56	0.0954017	0.226952	3.40752	0.0645435	0.276279
GTEX-14PK6-1726-SM-GW1WH	Colon-Transverse	70-79	0.423153	5957.14	0.13655	0.330596	17.617	0.073589	0.273642
GTEX-14PN3-1826-SM-GW1UC	Colon-Transverse	60-69	0.318525	3549.07	0.0979935	0.229906	-1.85796	0.0426087	0.209817
GTEX-15CHQ-2526-SM-GW1E3	Colon-Transverse	60-69	0.308861	5674.32	0.128381	0.283854	2.07794	0.0532964	0.244432
GTEX-15CHR-1426-SM-GW22K	Colon-Transverse	50-59	0.420076	9305.21	0.200255	0.381044	23.5812	0.0839575	0.301617
GTEX-15D79-2626-SM-GW1RH	Colon-Transverse	50-59	0.381029	6932.71	0.159877	0.316789	9.42638	0.0657924	0.266824
GTEX-15DDE-2726-SM-GW1TP	Colon-Transverse	50-59	0.346631	5370.45	0.129192	0.292465	6.83569	0.0586764	0.271998
GTEX-15DYW-2326-SM-GW1RO	Colon-Transverse	60-69	0.253779	3566.68	0.09328	0.222364	-1.10486	0.0529835	0.251594
GTEX-15EO6-2126-SM-GW1DH	Colon-Transverse	50-59	0.267314	4465.31	0.111844	0.250615	7.49343	0.0765294	0.312479
GTEX-15EU6-1926-SM-GW1D3	Colon-Transverse	50-59	0.243178	4217.79	0.105992	0.229384	-4.37211	0.0445228	0.226505
GTEX-15RIE-1826-SM-GW1EB	Colon-Transverse	60-69	0.280614	4103.64	0.103214	0.253028	10.8508	0.0560163	0.265525
GTEX-15SDE-1026-SM-GW1E5	Colon-Transverse	50-59	0.380313	4786.19	0.118348	0.27867	8.97062	0.0636778	0.255755
GTEX-15SHU-2526-SM-GW1EC	Colon-Transverse	40-49	0.123323	927.939	0.0439117	0.141642	-7.94492	0.0393933	0.223247
GTEX-15SHV-1326-SM-GW1DY	Colon-Transverse	60-69	0.333361	3282.67	0.0916077	0.242047	10.2764	0.0617353	0.264443
GTEX-15SHW-2526-SM-GW1QY	Colon-Transverse	60-69	0.382122	5993.58	0.137712	0.300042	9.39615	0.0618919	0.23827
GTEX-15SKB-2626-SM-GW1DC	Colon-Transverse	60-69	0.258696	4130.46	0.101254	0.226866	-0.106421	0.0535211	0.223095
GTEX-15SZO-2626-SM-GW1CT	Colon-Transverse	50-59	0.298061	5008.1	0.121088	0.266356	-0.501151	0.0491527	0.237136
GTEX-16AAH-1326-SM-GW22B	Colon-Transverse	50-59	0.36125	5716.65	0.12518	0.273346	8.64135	0.0666579	0.226572
GTEX-16NPV-2626-SM-GW1R1	Colon-Transverse	50-59	0.248445	4081.64	0.101912	0.24498	3.7061	0.0715269	0.304312
GTEX-16YQH-2526-SM-GW1DF	Colon-Transverse	30-39	0.266762	3952.91	0.100253	0.245422	11.2377	0.061868	0.245019
GTEX-17EVQ-1826-SM-GW1Q1	Colon-Transverse	70-79	0.312138	6443.45	0.143052	0.290173	12.8597	0.0873451	0.3301
GTEX-17HGU-2426-SM-GW1GQ	Colon-Transverse	50-59	0.336166	4181.25	0.107941	0.27156	6.9425	0.0569418	0.250892
GTEX-18A7A-2226-SM-GW1RX	Colon-Transverse	50-59	0.210737	2991.16	0.0830242	0.198203	-0.827695	0.0483306	0.237452
GTEX-18D9B-2526-SM-GW22E	Colon-Transverse	60-69	0.360408	5087.6	0.127143	0.308515	11.8233	0.0673588	0.269002
GTEX-18D9U-1926-SM-GW1D2	Colon-Transverse	40-49	0.210055	2416.53	0.0736651	0.195349	-3.87232	0.0511916	0.239008
GTEX-19HZE-2626-SM-GW1BU	Colon-Transverse	70-79	0.347144	5904.79	0.143237	0.313237	7.15952	0.0669565	0.275149
GTEX-1A32A-2426-SM-GW1GU	Colon-Transverse	50-59	0.305991	4891.79	0.11623	0.263407	13.8456	0.0771319	0.317515
GTEX-1A3MV-1126-SM-GW1TJ	Colon-Transverse	30-39	0.257339	3255.74	0.0877176	0.220609	7.64547	0.0612137	0.259902
GTEX-1A3MX-2226-SM-GW1EF	Colon-Transverse	60-69	0.120172	756.552	0.0431867	0.133856	-10.8818	0.0389132	0.19164
GTEX-1AX9I-2626-SM-GW1RQ	Colon-Transverse	60-69	0.366238	7688.09	0.1675	0.326506	8.07343	0.0712645	0.293944
GTEX-1AYD5-1726-SM-GW1UK	Colon-Transverse	50-59	0.335731	6443.21	0.14728	0.316778	12.1943	0.0855159	0.323871
GTEX-1B8KE-1926-SM-GW1QT	Colon-Transverse	50-59	0.131762	1493.6	0.0540338	0.150231	-10.7346	0.0464303	0.19247
GTEX-1B98T-2826-SM-GW1UE	Colon-Transverse	60-69	0.330555	5881.23	0.155551	0.315034	25.4857	0.0586714	0.25745
GTEX-1BAJH-2326-SM-GW1RI	Colon-Transverse	70-79	0.352282	7294.48	0.167714	0.319619	16.2055	0.0840481	0.3224
GTEX-1C4CL-2126-SM-GW21V	Colon-Transverse	30-39	0.308857	3986.04	0.0992964	0.246826	10.6281	0.0666768	0.282768
GTEX-1C64N-2326-SM-GW22X	Colon-Transverse	50-59	0.371796	7128.91	0.152199	0.309513	10.3261	0.0644857	0.287545
GTEX-1C64O-2326-SM-GW22L	Colon-Transverse	60-69	0.413222	4826.52	0.122582	0.291883	9.70526	0.0599443	0.257853
GTEX-1C6WA-2726-SM-GW1DK	Colon-Transverse	60-69	0.27208	2316.43	0.0727797	0.220886	0.926116	0.0552903	0.235154
GTEX-1CAMQ-1926-SM-GW1WS	Colon-Transverse	40-49	0.309062	5705.26	0.129711	0.282472	8.91015	0.0692201	0.306089
GTEX-1CAV2-1826-SM-GW1EG	Colon-Transverse	40-49	0.374486	8156.25	0.171868	0.330428	6.3973	0.0588867	0.26518
GTEX-1CB4H-2126-SM-GW1QJ	Colon-Transverse	60-69	0.239152	4514.07	0.111329	0.239348	4.24133	0.0719258	0.282737
GTEX-1E2YA-2626-SM-GW1QZ	Colon-Transverse	50-59	0.324637	5697.47	0.132445	0.292589	13.6788	0.0838625	0.334811
GTEX-1EN7A-2626-SM-GW1S2	Colon-Transverse	40-49	0.257919	3825.66	0.0992223	0.235737	4.21896	0.0652142	0.296121
GTEX-1F52S-2626-SM-GW1PV	Colon-Transverse	60-69	0.260106	3781.22	0.102591	0.232679	2.50052	0.0554402	0.250399
GTEX-1F5PK-1926-SM-GW1AY	Colon-Transverse	50-59	0.321634	4265.2	0.10499	0.266928	9.43288	0.0657504	0.25768
GTEX-1F5PL-2126-SM-GW1TK	Colon-Transverse	40-49	0.374341	4922.74	0.122778	0.290485	17.6746	0.074368	0.298792
GTEX-1F6I4-2626-SM-GW1WQ	Colon-Transverse	60-69	0.326476	6402.2	0.141037	0.286983	4.78678	0.0638843	0.265639
GTEX-1F6IF-1226-SM-GW2A1	Colon-Transverse	60-69	0.335254	6061.82	0.139067	0.298122	6.24217	0.0716392	0.291479
GTEX-1F6RS-2526-SM-GW1E4	Colon-Transverse	60-69	0.155104	1697.59	0.0582415	0.162875	-11.5466	0.0400997	0.190799
GTEX-1F75A-2726-SM-GW1UL	Colon-Transverse	50-59	0.263162	2842.1	0.0807108	0.225262	-0.543251	0.0493847	0.208295
GTEX-1F75W-2226-SM-GW1BY	Colon-Transverse	60-69	0.299451	6500.07	0.144512	0.285568	5.45507	0.0683148	0.288529
GTEX-1F88E-2226-SM-GW1RS	Colon-Transverse	60-69	0.149625	1624.09	0.0588437	0.156867	-8.01621	0.0430157	0.211789
GTEX-1GL5R-2426-SM-GW1TE	Colon-Transverse	50-59	0.380527	4851.83	0.118976	0.283443	10.0753	0.0571466	0.257134
GTEX-1GMR2-1726-SM-GW1DS	Colon-Transverse	50-59	0.0582422	-175.707	0.0288414	0.0779137	-11.9771	0.0414743	0.198425
GTEX-1GMR3-2826-SM-GW1RA	Colon-Transverse	40-49	0.227251	3076.26	0.0863895	0.21671	4.95495	0.0549179	0.253712
GTEX-1GTWX-2326-SM-GW1E2	Colon-Transverse	60-69	0.419609	11561.5	0.235683	0.390646	15.1906	0.0754555	0.306864
GTEX-1GZ4I-2426-SM-GW1GO	Colon-Transverse	50-59	0.261474	3479.48	0.0967229	0.226852	-2.18138	0.0498738	0.241113
GTEX-1GZHY-2626-SM-GW1WJ	Colon-Transverse	50-59	0.359399	5480.96	0.125726	0.274864	4.45609	0.056764	0.228377
GTEX-1H11D-2626-SM-GW1WM	Colon-Transverse	40-49	0.318863	3535.14	0.0979885	0.265352	10.7034	0.0588044	0.246399
GTEX-1H1DF-2526-SM-GW1PY	Colon-Transverse	40-49	0.216358	2897.48	0.0800065	0.206911	2.06062	0.0597818	0.244847
GTEX-1H1ZS-2326-SM-GW22W	Colon-Transverse	70-79	0.355412	8471.83	0.181563	0.345329	12.0769	0.0673385	0.304606
GTEX-1H23P-2426-SM-GW1RE	Colon-Transverse	60-69	0.268159	4767.85	0.116737	0.249935	2.44275	0.0646029	0.286002
GTEX-1H2FU-2726-SM-GW1TF	Colon-Transverse	60-69	0.232399	1937.68	0.0668663	0.187156	0.746167	0.0554709	0.234797
GTEX-1H3VE-2426-SM-GW1WI	Colon-Transverse	40-49	0.288632	4187.98	0.105743	0.223505	-0.76228	0.0512071	0.209955
GTEX-1H3VY-2426-SM-GW1DQ	Colon-Transverse	50-59	0.312378	3817.44	0.0970573	0.249085	4.46033	0.0562123	0.23729
GTEX-1HB9E-2426-SM-GW1TC	Colon-Transverse	50-59	0.26234	3730.09	0.0992515	0.242087	3.27544	0.055564	0.247981
GTEX-1HCVE-2526-SM-GW1QI	Colon-Transverse	50-59	0.296448	4076.01	0.106355	0.255188	9.47406	0.0691852	0.289817
GTEX-1HGF4-2126-SM-GW1GX	Colon-Transverse	60-69	0.166419	2347.34	0.0693049	0.173934	-9.16067	0.0407616	0.209353
GTEX-1HSKV-2226-SM-GW1BW	Colon-Transverse	60-69	0.386851	9275.11	0.191693	0.346473	6.81766	0.0675894	0.279294
GTEX-1I6K6-1826-SM-GW1PW	Colon-Transverse	30-39	0.350561	7204.54	0.156857	0.303645	10.2137	0.0680235	0.280569
GTEX-1ICLY-2626-SM-GW1RB	Colon-Transverse	50-59	0.445778	11634	0.230951	0.384986	12.6698	0.0669473	0.275899
GTEX-1IDJH-2726-SM-GW1X1	Colon-Transverse	70-79	0.399821	7592.32	0.161555	0.328099	18.4338	0.0683799	0.282747
GTEX-1IDJI-2326-SM-GW1GZ	Colon-Transverse	50-59	0.317764	4672.46	0.114985	0.26681	11.0881	0.0681959	0.255544
GTEX-1IDJU-2026-SM-GW1GM	Colon-Transverse	60-69	0.3723	3531.4	0.0998521	0.255416	7.51439	0.0541212	0.238889
GTEX-1IDJV-2726-SM-GW1WP	Colon-Transverse	60-69	0.437313	11896.2	0.24077	0.398276	17.4685	0.0884116	0.335652
GTEX-1IGQW-2326-SM-GW29Y	Colon-Transverse	60-69	0.321976	6035.49	0.1367	0.30307	12.6105	0.085101	0.33745
GTEX-1IKJJ-2426-SM-GW1PX	Colon-Transverse	60-69	0.23931	2455.82	0.0766346	0.197929	-1.59122	0.0490621	0.208695
GTEX-1IKK5-2726-SM-GW1C3	Colon-Transverse	60-69	0.324883	6432.91	0.144598	0.291807	4.59048	0.0620499	0.265191
GTEX-1IY9M-2126-SM-GW1QM	Colon-Transverse	60-69	0.339727	5727.68	0.128566	0.279155	3.2907	0.0558171	0.232643
GTEX-1J1OQ-2726-SM-GW1QH	Colon-Transverse	40-49	0.23295	3692.49	0.0987712	0.22411	3.40124	0.060862	0.262158
GTEX-1J1R8-1126-SM-GW1T4	Colon-Transverse	40-49	0.403264	5093.69	0.125585	0.279402	13.6092	0.0685607	0.268427
GTEX-1J8Q2-2426-SM-GW219	Colon-Transverse	60-69	0.378103	9003.16	0.188243	0.347624	12.2625	0.0851339	0.347663
GTEX-1J8Q3-2326-SM-GW1BV	Colon-Transverse	60-69	0.359304	4288.35	0.112753	0.277655	10.8147	0.0669615	0.266003
GTEX-1JK1U-1526-SM-GW2CH	Colon-Transverse	60-69	0.362211	4988.9	0.123502	0.279259	18.2136	0.0843336	0.308228
GTEX-1JMOU-2426-SM-GW2CD	Colon-Transverse	60-69	0.239714	4208.8	0.110606	0.223967	8.23918	0.0736616	0.258613
GTEX-1JMPZ-2426-SM-GW177	Colon-Transverse	30-39	0.209858	3511.46	0.0946062	0.20838	-0.617871	0.0562139	0.250065
GTEX-1JMQJ-2826-SM-GW1EP	Colon-Transverse	50-59	0.303146	6060.45	0.13913	0.27725	4.7324	0.0642101	0.257901
GTEX-1JN1M-2626-SM-GW1VZ	Colon-Transverse	60-69	0.172983	1425.9	0.0575765	0.176452	-0.248666	0.0639229	0.185976
GTEX-1JN6P-1926-SM-GW1EO	Colon-Transverse	60-69	0.315087	6787.59	0.152459	0.28888	4.89087	0.0623308	0.271583
GTEX-1JN76-1226-SM-GW211	Colon-Transverse	20-29	0.205756	1805.47	0.0643386	0.164868	11.9295	0.0676626	0.253102
GTEX-RUSQ-1226-SM-GW19J	Colon-Transverse	50-59	0.423428	8244.2	0.178706	0.350423	18.8407	0.075646	0.283955
GTEX-RVPU-1626-SM-GW1ZJ	Colon-Transverse	50-59	0.259365	3229.63	0.090332	0.234755	5.38101	0.0616068	0.272552
GTEX-RVPV-2226-SM-GW23T	Colon-Transverse	60-69	0.178657	2006.96	0.0635273	0.17829	-4.87373	0.0520366	0.217506
GTEX-S33H-2126-SM-GW1AJ	Colon-Transverse	30-39	0.0562705	63.3706	0.0308369	0.0977078	-14.5498	0.0428746	0.183101
GTEX-S341-1426-SM-GW1XN	Colon-Transverse	40-49	0.287166	3557.05	0.0974452	0.247016	2.70087	0.0556661	0.243257
GTEX-S4Z8-1526-SM-GW1US	Colon-Transverse	60-69	0.0627916	-186.998	0.0273311	0.0643428	-4.29902	0.059358	0.245369
GTEX-S7SE-2226-SM-GW19R	Colon-Transverse	50-59	0.166096	1886.67	0.0596592	0.157266	-9.7331	0.0528962	0.184951
GTEX-SIU8-2426-SM-GW2BZ	Colon-Transverse	50-59	0.235947	2653.68	0.0768372	0.212994	5.11527	0.0533323	0.247432
GTEX-SJXC-2226-SM-GW23Z	Colon-Transverse	60-69	0.366813	7600.79	0.166089	0.321777	10.724	0.0674052	0.299391
GTEX-SN8G-2726-SM-GW1YA	Colon-Transverse	50-59	0.294503	4865.98	0.117678	0.244907	3.61832	0.0677423	0.255905
GTEX-T2IS-2726-SM-GW1ZR	Colon-Transverse	20-29	0.27632	4166.12	0.105269	0.227055	4.10446	0.0556687	0.233102
GTEX-T2YK-2126-SM-GW193	Colon-Transverse	50-59	0.230414	4344.19	0.104924	0.227137	-4.22694	0.0587217	0.208227
GTEX-T8EM-1426-SM-GW19O	Colon-Transverse	40-49	0.263363	4496.99	0.111347	0.247417	14.9874	0.0723041	0.261404
GTEX-TSE9-1826-SM-GW245	Colon-Transverse	60-69	0.399577	9732.76	0.197992	0.335358	4.62338	0.0687724	0.253657
GTEX-U3ZH-1326-SM-GW1U2	Colon-Transverse	30-39	0.166498	1304.77	0.0549978	0.159533	0.889497	0.056924	0.24692
GTEX-U3ZM-1126-SM-GW1YU	Colon-Transverse	40-49	0.314381	4686.15	0.114931	0.260527	7.91913	0.0583907	0.240975
GTEX-U8T8-1326-SM-GW19F	Colon-Transverse	60-69	0.328956	6699.13	0.147128	0.299282	6.49487	0.071522	0.294381
GTEX-UJHI-1126-SM-GW1B7	Colon-Transverse	50-59	0.378924	6274.48	0.145783	0.31594	18.4111	0.0809811	0.288751
GTEX-UPJH-2026-SM-GW1ZF	Colon-Transverse	50-59	0.146182	941.033	0.0493956	0.146893	-9.62684	0.0461118	0.191169
GTEX-UPK5-2226-SM-GW2AP	Colon-Transverse	40-49	0.290988	3978.37	0.102881	0.253833	2.28037	0.0565717	0.246339
GTEX-UTHO-2526-SM-GW1B2	Colon-Transverse	60-69	0.410609	7788.1	0.170698	0.346629	22.0006	0.0815703	0.30654
GTEX-W5X1-1726-SM-GW1ZH	Colon-Transverse	40-49	0.292792	5525.37	0.128632	0.278879	4.96884	0.071364	0.306836
GTEX-WFG8-1526-SM-GW2C7	Colon-Transverse	20-29	0.231126	2426.38	0.0737599	0.197081	12.1902	0.064013	0.266106
GTEX-WH7G-1326-SM-GW1H6	Colon-Transverse	40-49	0.309711	4198.9	0.106031	0.261467	15.827	0.0737488	0.295269
GTEX-WK11-2326-SM-GW1BH	Colon-Transverse	50-59	0.282143	4777.49	0.115114	0.247865	0.742097	0.0505423	0.228283
GTEX-WOFL-2626-SM-GW1FR	Colon-Transverse	60-69	0.210408	3385.99	0.0903859	0.203484	-5.15148	0.0481475	0.233134
GTEX-WQUQ-2526-SM-GW1YS	Colon-Transverse	60-69	0.447221	11815.5	0.243249	0.40126	19.3451	0.0814933	0.303553
GTEX-WRHU-2326-SM-GW1ZI	Colon-Transverse	50-59	0.331327	5227.24	0.125672	0.284948	8.85027	0.0647779	0.252641
GTEX-WVLH-2426-SM-GW1ZT	Colon-Transverse	50-59	0.310406	4398.63	0.112382	0.265617	6.5369	0.0621925	0.261344
GTEX-WWYW-2326-SM-GW1YR	Colon-Transverse	50-59	0.120539	1150.03	0.0518369	0.136958	-10.9536	0.0491002	0.195938
GTEX-WXYG-1826-SM-GW1FQ	Colon-Transverse	50-59	0.132799	1123.09	0.0544734	0.144844	-4.92474	0.0500908	0.233253
GTEX-WY7C-1626-SM-GW1WC	Colon-Transverse	50-59	0.0748928	134.855	0.033424	0.100971	-13.8013	0.039657	0.188915
GTEX-WYBS-2326-SM-GW2AI	Colon-Transverse	60-69	0.0892626	200.598	0.0353315	0.105371	-10.8827	0.0456778	0.195069
GTEX-X261-1826-SM-GW1ES	Colon-Transverse	50-59	0.26376	5521.89	0.11753	0.255255	-0.28936	0.0582846	0.245073
GTEX-X4EO-2526-SM-GW22T	Colon-Transverse	60-69	0.307956	3053.6	0.0873156	0.203507	-4.30043	0.0436708	0.200759
GTEX-X4EP-2726-SM-GW2AY	Colon-Transverse	60-69	0.250893	3320.04	0.0892551	0.220362	2.37969	0.0537507	0.242461
GTEX-X4XX-2526-SM-GW1CH	Colon-Transverse	60-69	0.332293	6377.61	0.148417	0.290807	5.2234	0.0610297	0.264526
GTEX-X4XY-2626-SM-GW23M	Colon-Transverse	60-69	0.401887	10501.2	0.212404	0.351534	11.5485	0.0651146	0.274534
GTEX-X585-2626-SM-GW23A	Colon-Transverse	50-59	0.364756	7364.22	0.160189	0.317227	6.04906	0.0617726	0.278181
GTEX-X5EB-0926-SM-GW22S	Colon-Transverse	40-49	0.0561855	-54.1771	0.0301431	0.080916	-14.9841	0.041088	0.186311
GTEX-X62O-2626-SM-GW2BO	Colon-Transverse	50-59	0.341898	5833.08	0.137232	0.294384	12.6014	0.0691346	0.301274
GTEX-X8HC-2426-SM-GW1BF	Colon-Transverse	50-59	0.265633	3229.54	0.0859097	0.217047	4.40118	0.0564944	0.231411
GTEX-XBEC-2426-SM-GW1EU	Colon-Transverse	50-59	0.372612	6104.59	0.143197	0.316735	13.2247	0.073305	0.294506
GTEX-XBED-1526-SM-GW1XS	Colon-Transverse	60-69	0.288623	3542.3	0.0914918	0.235803	0.784554	0.0477807	0.223058
GTEX-XMD2-2526-SM-GW247	Colon-Transverse	60-69	0.300529	5768.53	0.13013	0.279456	-0.068065	0.0564744	0.259904
GTEX-XMK1-1726-SM-GW2AO	Colon-Transverse	40-49	0.310627	5753.21	0.135757	0.282234	14.7536	0.0823364	0.297536
GTEX-XPT6-1126-SM-GW246	Colon-Transverse	20-29	0.111201	932.245	0.044838	0.123064	-8.94543	0.0476727	0.1757
GTEX-XPVG-1826-SM-GW2BB	Colon-Transverse	50-59	0.407254	4982.59	0.123215	0.294838	21.2393	0.0840652	0.299689
GTEX-XQ3S-2626-SM-GW1CK	Colon-Transverse	20-29	0.181093	1569.95	0.0585459	0.162084	-0.892032	0.0513794	0.237255
GTEX-XUJ4-2026-SM-GW1WN	Colon-Transverse	60-69	0.414686	6448.42	0.14432	0.312608	19.9223	0.0885761	0.307655
GTEX-XV7Q-2126-SM-GW1WA	Colon-Transverse	40-49	0.317725	3386.44	0.0942985	0.25107	8.33292	0.0667021	0.285786
GTEX-XYKS-2226-SM-GW1F7	Colon-Transverse	60-69	0.338756	4687.48	0.115325	0.273393	8.75688	0.0637094	0.26192
GTEX-Y111-1426-SM-GW1YN	Colon-Transverse	50-59	0.223067	3104.16	0.0860193	0.208538	3.3972	0.0573389	0.247818
GTEX-YB5E-1626-SM-GW1B9	Colon-Transverse	40-49	0.338285	4499.89	0.111973	0.266242	15.6668	0.0660389	0.26961
GTEX-YFCO-1426-SM-GW1A4	Colon-Transverse	40-49	0.395837	5657.2	0.132869	0.327036	13.9299	0.066682	0.273109
GTEX-YJ89-2426-SM-GW1Y9	Colon-Transverse	60-69	0.247951	4143.56	0.106776	0.22154	-1.85219	0.0522443	0.220918
GTEX-Z93S-2426-SM-GW1UT	Colon-Transverse	50-59	0.284831	4148.67	0.101005	0.239367	-0.770684	0.0479641	0.225034
GTEX-ZAB4-2226-SM-GW1GJ	Colon-Transverse	40-49	0.296846	4860.62	0.116795	0.256753	9.09227	0.0681138	0.297852
GTEX-ZDTS-2526-SM-GW1GB	Colon-Transverse	60-69	0.373028	7920.45	0.164667	0.327233	9.67106	0.0602753	0.278437
GTEX-ZDXO-1826-SM-GW229	Colon-Transverse	60-69	0.172783	1879.91	0.0638053	0.167845	23.702	0.0483773	0.247638
GTEX-ZVZP-1926-SM-GW1XM	Colon-Transverse	50-59	0.290025	3623.39	0.0928513	0.243587	1.77867	0.0490762	0.233905
GTEX-ZVZQ-2526-SM-GW1UV	Colon-Transverse	60-69	0.199481	1874.96	0.0634609	0.176858	-4.74731	0.042685	0.205782
GTEX-ZYFG-1926-SM-GW23Q	Colon-Transverse	60-69	0.401067	6389.83	0.144424	0.323013	17.4549	0.0752944	0.295235
GTEX-ZYY3-2026-SM-GW1GL	Colon-Transverse	60-69	0.321558	4093.94	0.105904	0.267686	7.86827	0.0583545	0.251855
GTEX-117XS-1326-SM-GW22U	Kidney-Cortex	60-69	0.102527	296.86	0.0402743	0.119633	-11.5106	0.0482718	0.153519
GTEX-117YW-1226-SM-GW1UU	Kidney-Cortex	50-59	0.14594	924.061	0.0485782	0.154762	-5.18565	0.0411554	0.202996
GTEX-1192W-1326-SM-GW1BO	Kidney-Cortex	60-69	0.132114	1122.89	0.052178	0.154006	-5.8175	0.0420347	0.199055
GTEX-1192X-2026-SM-GW1GI	Kidney-Cortex	50-59	0.125125	663.577	0.0442331	0.143983	-10.3129	0.0386277	0.158912
GTEX-11EMC-1326-SM-GW1UW	Kidney-Cortex	60-69	0.0886644	337.848	0.0387468	0.127385	-11.7556	0.0439179	0.170023
GTEX-11NV4-1526-SM-GW1YO	Kidney-Cortex	60-69	0.0933849	692.936	0.0452411	0.13131	-3.71	0.0473277	0.172128
GTEX-11UD2-2126-SM-GW1YM	Kidney-Cortex	50-59	0.1134	657.71	0.0450946	0.136845	-4.34134	0.0503266	0.174718
GTEX-11WQC-1426-SM-GW1EM	Kidney-Cortex	60-69	0.126468	985.323	0.0538352	0.143367	-3.65818	0.0483969	0.185469
GTEX-11WQK-1926-SM-GW29M	Kidney-Cortex	50-59	0.104126	571.698	0.0431	0.131546	-5.92414	0.0422553	0.193998
GTEX-11ZU8-1826-SM-GW1BE	Kidney-Cortex	60-69	0.0917609	257	0.0374768	0.114545	-7.75863	0.0424269	0.173885
GTEX-1212Z-1626-SM-GW2AS	Kidney-Cortex	60-69	0.138653	995.93	0.05255	0.14933	-2.57848	0.0460826	0.193318
GTEX-12696-0926-SM-GW2AJ	Kidney-Cortex	60-69	0.111035	533.344	0.041549	0.142381	3.04574	0.0358761	0.178943
GTEX-12KS4-1826-SM-GW19V	Kidney-Cortex	30-39	0.0612597	-88.8575	0.0302387	0.0931344	-11.9001	0.0406459	0.164496
GTEX-12WSA-2126-SM-GW23P	Kidney-Cortex	60-69	0.0916642	406.192	0.0398694	0.131629	-5.87015	0.0343865	0.163647
GTEX-12WSD-2226-SM-GW21W	Kidney-Cortex	60-69	0.239643	3137.52	0.0901811	0.231843	6.84412	0.0634327	0.265095
GTEX-12WSF-2126-SM-GW2C8	Kidney-Cortex	70-79	0.205791	2073.3	0.0692275	0.200018	6.87356	0.0517222	0.247419
GTEX-12WSI-1826-SM-GW1EH	Kidney-Cortex	50-59	0.0920708	622.342	0.0449812	0.129814	-8.68806	0.0428666	0.183352
GTEX-12ZZW-2126-SM-GW23V	Kidney-Cortex	50-59	0.11645	727.089	0.0458814	0.157043	-2.04213	0.0384615	0.17038
GTEX-12ZZX-2226-SM-GW1BD	Kidney-Cortex	40-49	0.0733728	287.737	0.0384657	0.128618	-6.2911	0.0477736	0.160469
GTEX-12ZZY-2226-SM-GW1EI	Kidney-Cortex	60-69	0.106621	472.126	0.0422311	0.128639	-9.09573	0.0429328	0.186779
GTEX-12ZZZ-1026-SM-GW1F4	Kidney-Cortex	60-69	0.13314	849.817	0.049033	0.13832	-6.04987	0.0507381	0.181747
GTEX-13112-2126-SM-GW2BK	Kidney-Cortex	50-59	0.0814256	214.928	0.0353461	0.132895	0.889859	0.0382111	0.164934
GTEX-13N1W-2126-SM-GW1XQ	Kidney-Cortex	70-79	0.105303	428.059	0.040657	0.133593	-10.4604	0.0414195	0.170637
GTEX-13NYS-1426-SM-GW195	Kidney-Cortex	60-69	0.102239	634.695	0.0459849	0.128607	-10.3149	0.0505269	0.165577
GTEX-13O3P-1926-SM-GW2C3	Kidney-Cortex	50-59	0.0934053	90.8191	0.0344122	0.113086	-9.47303	0.0369042	0.169124
GTEX-13OW5-2026-SM-GW23Y	Kidney-Cortex	60-69	0.0669478	-148.375	0.029771	0.105113	-10.447	0.0331319	0.153239
GTEX-13QJC-1226-SM-GW1H7	Kidney-Cortex	60-69	0.153103	1347.11	0.0563463	0.166299	-8.92486	0.0435845	0.166935
GTEX-13SLX-1526-SM-GW29U	Kidney-Cortex	50-59	0.0949419	439.496	0.0403764	0.12762	-8.52595	0.0410927	0.183445
GTEX-13W46-2326-SM-GW1ZG	Kidney-Cortex	50-59	0.136908	1003.63	0.0514743	0.151619	0.759163	0.0479243	0.191317
GTEX-148VJ-1926-SM-GW22I	Kidney-Cortex	70-79	0.153061	1495.83	0.0596307	0.165292	-6.63529	0.0507579	0.182161
GTEX-14A5H-2526-SM-GW22F	Kidney-Cortex	60-69	0.179183	2054.04	0.065712	0.17642	-3.1985	0.0569765	0.209602
GTEX-14C39-2126-SM-GW22J	Kidney-Cortex	40-49	0.0799362	-0.708063	0.0334132	0.105635	-10.708	0.0382514	0.17577
GTEX-15DDE-2126-SM-GW1SW	Kidney-Cortex	50-59	0.16623	1604.69	0.0625545	0.166997	0.161837	0.0482319	0.201833
GTEX-15SHU-2026-SM-GW22D	Kidney-Cortex	40-49	0.0928019	212.685	0.0363465	0.128623	-11.4517	0.0370536	0.170392
GTEX-1B98T-2526-SM-GW1SX	Kidney-Cortex	60-69	0.1108	575.109	0.044606	0.131624	-8.45278	0.0518746	0.160883
GTEX-1F6IF-1626-SM-GW1TL	Kidney-Cortex	60-69	0.0993415	579.586	0.0437841	0.132548	-9.22674	0.045735	0.177398
GTEX-1GTWX-1826-SM-GW2A3	Kidney-Cortex	60-69	0.147384	1053.89	0.0529443	0.16074	-3.00478	0.0428578	0.184394
GTEX-1H1ZS-2026-SM-GW22H	Kidney-Cortex	70-79	0.131435	1005.86	0.0529019	0.151167	-8.47719	0.0461148	0.159497
GTEX-S33H-1426-SM-GW22P	Kidney-Cortex	30-39	0.0739129	-173.734	0.0287263	0.101541	-13.299	0.0365401	0.169159
GTEX-SIU8-1826-SM-GW1AO	Kidney-Cortex	50-59	0.0873705	462.269	0.0419341	0.124584	-6.29699	0.0514972	0.168884
GTEX-UTHO-2326-SM-GW1FP	Kidney-Cortex	60-69	0.115291	724.824	0.046739	0.129324	-7.2719	0.0410078	0.171128
GTEX-WOFL-1826-SM-GW1ZV	Kidney-Cortex	60-69	0.0983484	486.042	0.0420001	0.128205	-7.84072	0.0388063	0.192896
GTEX-WRHU-0526-SM-GW196	Kidney-Cortex	50-59	0.0975241	616.563	0.0454143	0.124498	-9.86057	0.0473366	0.1704
GTEX-WWYW-2226-SM-GW1YQ	Kidney-Cortex	50-59	0.0899018	550.871	0.0435978	0.126117	-5.09147	0.0462838	0.166535
GTEX-X261-1126-SM-GW1YZ	Kidney-Cortex	50-59	0.0868171	498.369	0.042578	0.121553	-8.77809	0.0479832	0.165093
GTEX-X4EP-1926-SM-GW2AD	Kidney-Cortex	60-69	0.132438	868.589	0.0484993	0.158256	-5.76717	0.0398721	0.198611
GTEX-X4XX-2326-SM-GW1CN	Kidney-Cortex	60-69	0.232478	3472.96	0.100014	0.234358	6.53132	0.0591301	0.231255
GTEX-X585-2126-SM-GW23B	Kidney-Cortex	50-59	0.164886	2132.7	0.0703052	0.186832	-1.32479	0.0437456	0.207409
GTEX-X62O-1926-SM-GW19P	Kidney-Cortex	50-59	0.115661	623.602	0.0460186	0.130901	-6.79517	0.0507609	0.159087
GTEX-YFC4-1926-SM-GW244	Kidney-Cortex	40-49	0.0654478	-239.746	0.0268089	0.0941619	-12.6179	0.0388892	0.167607
GTEX-1117F-1026-SM-GW2CO	Lung	60-69	0.222435	3159.77	0.0854531	0.200419	6.63315	0.0678285	0.271894
GTEX-113JC-1326-SM-GW1F2	Lung	50-59	0.181075	2344.77	0.074274	0.180291	0.885403	0.0499711	0.210475
GTEX-1192W-0626-SM-GW224	Lung	60-69	0.184623	1834.28	0.0631046	0.161005	0.286736	0.0649016	0.217562
GTEX-1192X-1326-SM-GW191	Lung	50-59	0.133049	1438.87	0.0560791	0.143725	-1.36634	0.0513618	0.208028
GTEX-11DXZ-0726-SM-GW23R	Lung	50-59	0.0933342	213.44	0.0346858	0.09826	-5.51146	0.0402735	0.173364
GTEX-11DYG-0626-SM-GW1XU	Lung	60-69	0.10775	526.67	0.0391731	0.11919	-1.50998	0.0503817	0.210318
GTEX-11GSP-0726-SM-GW2CL	Lung	60-69	0.0898206	628.123	0.0424999	0.107201	0.559322	0.0503006	0.213199
GTEX-11I78-0126-SM-GW226	Lung	50-59	0.10475	676.071	0.0441583	0.104558	-5.83183	0.0502421	0.163149
GTEX-11NV4-1126-SM-GW17Z	Lung	60-69	0.171132	1762.72	0.0596858	0.156302	4.41593	0.0481581	0.228377
GTEX-11TTK-0926-SM-GW19B	Lung	60-69	0.16036	1621.31	0.0595441	0.147636	-0.108975	0.0580813	0.18662
GTEX-11WQK-1226-SM-GW2CV	Lung	50-59	0.11056	820.259	0.0464988	0.109849	-2.17742	0.0485529	0.20397
GTEX-11XUK-0326-SM-GW19G	Lung	40-49	0.13162	1158.34	0.0513686	0.131277	0.598503	0.0553987	0.201589
GTEX-11ZTS-1226-SM-GW1A7	Lung	60-69	0.133996	1282.6	0.0539538	0.136336	0.729044	0.0565254	0.228595
GTEX-11ZUS-0126-SM-GW2BW	Lung	30-39	0.166639	1769.19	0.0584444	0.14699	1.42228	0.0500565	0.252593
GTEX-1212Z-1026-SM-GW1UX	Lung	60-69	0.154414	1542.3	0.0568061	0.149334	-0.965179	0.0410623	0.190921
GTEX-12584-1426-SM-GW1UR	Lung	40-49	0.139347	953.879	0.0478256	0.125465	2.19243	0.0449084	0.228794
GTEX-12WSA-1026-SM-GW18E	Lung	60-69	0.0937916	469.396	0.0384025	0.103365	-1.86207	0.0422013	0.193765
GTEX-12WSD-0826-SM-GW21I	Lung	60-69	0.201792	2582.67	0.0746287	0.188448	6.03276	0.0616445	0.253231
GTEX-12WSE-0826-SM-GW22V	Lung	20-29	0.0760853	98.5548	0.0336315	0.0874623	-4.92672	0.0414998	0.197709
GTEX-12ZZX-0926-SM-GW18L	Lung	40-49	0.155415	1442.87	0.055556	0.143316	0.184913	0.0503445	0.224168
GTEX-13111-0426-SM-GW1YH	Lung	50-59	0.193322	3074.01	0.0824441	0.18621	0.544367	0.0519677	0.220106
GTEX-13112-0826-SM-GW1ST	Lung	50-59	0.138783	1429.44	0.0557115	0.138351	-1.12504	0.0470696	0.203948
GTEX-139TT-0726-SM-GW1XV	Lung	60-69	0.175251	1619.98	0.056169	0.140177	-2.05473	0.0516038	0.209871
GTEX-139YR-0926-SM-GW1FL	Lung	50-59	0.15936	2006.88	0.0678838	0.147788	-6.73984	0.0419126	0.156326
GTEX-13CF2-0726-SM-GW1FT	Lung	60-69	0.18008	2036.37	0.0674027	0.186138	1.48431	0.0455548	0.208438
GTEX-13FXS-0826-SM-GW2AX	Lung	50-59	0.127864	1026.39	0.0484237	0.129316	0.405171	0.0516526	0.234113
GTEX-13IVO-1026-SM-GW1EL	Lung	70-79	0.206678	2875.49	0.0814437	0.185183	7.07924	0.0650849	0.239777
GTEX-13NYS-1626-SM-GW1VT	Lung	60-69	0.120474	688.566	0.0425503	0.113572	-4.89769	0.0492073	0.178105
GTEX-13NZA-1426-SM-GW1VS	Lung	60-69	0.120137	582.944	0.0413964	0.120222	-2.26089	0.0481935	0.204561
GTEX-13O3P-1026-SM-GW1UY	Lung	50-59	0.119613	890.996	0.0452561	0.121566	-4.54186	0.041168	0.186391
GTEX-13OVK-0126-SM-GW1XG	Lung	40-49	0.106263	492.106	0.0395735	0.103974	-2.01167	0.0501815	0.201385
GTEX-13OW5-0726-SM-GW1V7	Lung	60-69	0.0957699	488.259	0.0381178	0.105725	-4.33625	0.0381746	0.166718
GTEX-13OW8-1726-SM-GW1U6	Lung	60-69	0.225618	2662.65	0.0771866	0.193251	3.35437	0.0591823	0.25447
GTEX-13PL6-2426-SM-GW1UQ	Lung	40-49	0.147849	1481.95	0.0561916	0.137965	1.57519	0.0506891	0.218338
GTEX-13QIC-0326-SM-GW1TX	Lung	60-69	0.156229	1381.37	0.0546239	0.148344	0.738941	0.0482652	0.208276
GTEX-13RTJ-1126-SM-GW18K	Lung	60-69	0.176163	2130.28	0.0684126	0.175077	5.33658	0.0525025	0.23977
GTEX-13W46-1426-SM-GW1AA	Lung	50-59	0.152152	1583.74	0.0590277	0.148477	0.109214	0.053383	0.197852
GTEX-145MH-0626-SM-GW1ZB	Lung	50-59	0.117238	1110.5	0.0512647	0.137985	1.52268	0.0467135	0.220106
GTEX-146FH-1226-SM-GW1RN	Lung	50-59	0.123114	1000.99	0.0487186	0.118315	-1.12365	0.0472029	0.217822
GTEX-14753-0826-SM-GW1E7	Lung	60-69	0.158886	1445.06	0.0555706	0.135368	-3.45166	0.0485509	0.20615
GTEX-1477Z-0626-SM-GW1RM	Lung	60-69	0.131043	1474.58	0.055993	0.141289	-0.122123	0.0497996	0.216744
GTEX-14A5I-0926-SM-GW2DC	Lung	50-59	0.0837932	178.744	0.034439	0.0807566	-11.2943	0.0434414	0.147653
GTEX-14A6H-0526-SM-GW1DA	Lung	30-39	0.0692284	66.4929	0.031647	0.0758762	-5.4104	0.0392739	0.179061
GTEX-14AS3-0926-SM-GW1X7	Lung	40-49	0.105071	425.728	0.0371185	0.0993977	0.0115057	0.0494328	0.200733
GTEX-14BIM-0726-SM-GW18T	Lung	60-69	0.14337	1433.87	0.0550453	0.146494	-0.351905	0.0448754	0.197271
GTEX-14BIN-0226-SM-GW188	Lung	50-59	0.113711	939.359	0.0476203	0.115765	1.27289	0.054864	0.225553
GTEX-14BMV-0826-SM-GW1QQ	Lung	50-59	0.111007	775.676	0.0455972	0.110182	-2.77568	0.0473296	0.202529
GTEX-14DAR-0226-SM-GW1WU	Lung	50-59	0.0760389	135.715	0.0324799	0.0968801	-5.70196	0.0424581	0.171858
GTEX-14E6C-1426-SM-GW1CP	Lung	40-49	0.197365	2537.97	0.072507	0.176009	2.28544	0.0546448	0.245978
GTEX-14E7W-1326-SM-GW217	Lung	70-79	0.164181	1718.08	0.060723	0.14928	-0.342674	0.0530809	0.228205
GTEX-14JFF-1126-SM-GW1CX	Lung	60-69	0.137661	1330.75	0.053939	0.143478	2.21147	0.0447395	0.21849
GTEX-14JG1-0926-SM-GW1CZ	Lung	40-49	0.112591	1094.38	0.0503001	0.122092	-2.49028	0.0462994	0.190238
GTEX-14JG6-0326-SM-GW1ED	Lung	30-39	0.0735396	-11.2551	0.0318583	0.0884473	-2.49039	0.0425683	0.194114
GTEX-14LZ3-0726-SM-GW18U	Lung	60-69	0.0734946	-18.0623	0.0296028	0.0951774	-1.07536	0.0427523	0.212262
GTEX-14PJ4-0626-SM-GW1QR	Lung	60-69	0.138889	1485.77	0.0555724	0.153275	4.01062	0.0552718	0.244344
GTEX-14PJ6-0426-SM-GW1C8	Lung	60-69	0.119259	759.143	0.0442331	0.118456	-3.35101	0.0441399	0.203289
GTEX-14PJM-0926-SM-GW2CR	Lung	50-59	0.0978399	866.123	0.0470136	0.10857	5.15423	0.0720268	0.269471
GTEX-14PJO-0926-SM-GW1RZ	Lung	60-69	0.128049	1256.5	0.0546645	0.137578	3.37421	0.0543393	0.237164
GTEX-14PK6-0326-SM-GW1C7	Lung	70-79	0.144856	1489.98	0.0559981	0.149858	-0.41667	0.0443247	0.205443
GTEX-14PN3-0926-SM-GW1DX	Lung	60-69	0.145864	942.261	0.0483456	0.136977	-1.16047	0.0426257	0.20208
GTEX-15CHR-0726-SM-GW1RR	Lung	50-59	0.0915074	608.472	0.0418655	0.10529	-1.74497	0.0464586	0.203972
GTEX-15D1Q-0526-SM-GW2DA	Lung	40-49	0.102737	760.002	0.0441782	0.111032	-1.12122	0.0524562	0.207983
GTEX-15D79-1026-SM-GW1CY	Lung	50-59	0.115	926.447	0.0477721	0.119102	-4.05711	0.0409347	0.196539
GTEX-15DDE-0826-SM-GW21H	Lung	50-59	0.0988963	598.415	0.0413968	0.108674	-1.21671	0.0446455	0.196227
GTEX-15EO6-0326-SM-GW1T5	Lung	50-59	0.0938296	513.001	0.0392581	0.111976	-0.847894	0.0422236	0.212603
GTEX-15EU6-1226-SM-GW17S	Lung	50-59	0.0665584	208.171	0.034413	0.0780438	-8.57927	0.0429652	0.145706
GTEX-15G1A-0426-SM-GW1BS	Lung	30-39	0.0812848	340.332	0.0379819	0.087135	-7.87641	0.0428125	0.166665
GTEX-15RIE-0326-SM-GW1GV	Lung	60-69	0.105055	829.355	0.0441268	0.116355	-1.90409	0.0482952	0.221859
GTEX-15RJE-1026-SM-GW2CM	Lung	40-49	0.0921808	481.029	0.0390446	0.104753	-0.888345	0.0576237	0.236937
GTEX-15SDE-0226-SM-GW1S7	Lung	50-59	0.125998	1106.15	0.0513394	0.127221	-2.06657	0.0456484	0.18104
GTEX-15SHV-0326-SM-GW1QS	Lung	60-69	0.148009	2130.53	0.0658714	0.148138	4.16742	0.0560831	0.242232
GTEX-15SHW-0926-SM-GW1RW	Lung	60-69	0.168282	1672.13	0.0617476	0.151597	3.13106	0.0604478	0.25241
GTEX-15SKB-0826-SM-GW1S9	Lung	60-69	0.111458	1180.51	0.0514368	0.140643	0.857056	0.0518541	0.231075
GTEX-15SZO-0926-SM-GW2DF	Lung	50-59	0.10465	503.626	0.0412821	0.101407	-3.92174	0.0478191	0.210722
GTEX-15UF6-1226-SM-GW1WV	Lung	70-79	0.110429	926.173	0.045271	0.123652	-0.985558	0.0479328	0.19728
GTEX-15UKP-1926-SM-GW22M	Lung	20-29	0.0647419	-74.4536	0.0307187	0.069303	-6.61108	0.0404613	0.173912
GTEX-16AAH-0426-SM-GW1DR	Lung	50-59	0.115439	936.058	0.0474654	0.107291	-4.72938	0.0429246	0.176655
GTEX-16NPV-0726-SM-GW2DE	Lung	50-59	0.0785804	372.846	0.0379273	0.0940874	-2.97535	0.0493916	0.206003
GTEX-16YQH-1626-SM-GW17E	Lung	30-39	0.109574	416.014	0.0387337	0.101893	-1.94517	0.0467427	0.190558
GTEX-17EVQ-1526-SM-GW1R3	Lung	70-79	0.10479	1026.6	0.0475333	0.126766	0.945587	0.0559774	0.239728
GTEX-17HG3-0326-SM-GW231	Lung	30-39	0.197463	1980.65	0.0661555	0.166938	-1.12759	0.0480308	0.220389
GTEX-18465-0626-SM-GW1C9	Lung	50-59	0.150205	1544.73	0.0579121	0.148025	1.52017	0.047133	0.211474
GTEX-18A66-0926-SM-GW29X	Lung	60-69	0.0858008	161.682	0.0341414	0.096311	-3.31611	0.0461895	0.205874
GTEX-18D9B-1026-SM-GW1QG	Lung	60-69	0.151227	1871.66	0.0642817	0.160125	0.75241	0.0553343	0.234147
GTEX-18D9U-0526-SM-GW1XD	Lung	40-49	0.121778	848.211	0.0451209	0.117074	-1.03115	0.0433719	0.204434
GTEX-19HZE-0526-SM-GW1RP	Lung	70-79	0.177133	1978.18	0.066376	0.147228	-5.26131	0.042334	0.168753
GTEX-1A3MV-0526-SM-GW2DB	Lung	30-39	0.0946743	490.072	0.0395353	0.101732	-2.29644	0.0460691	0.204604
GTEX-1A3MX-0726-SM-GW1DP	Lung	60-69	0.144597	1265.04	0.0531219	0.142143	-3.48759	0.0460153	0.205856
GTEX-1AX9I-0826-SM-GW1R7	Lung	60-69	0.171918	1999	0.0667278	0.158239	4.05712	0.0518974	0.24683
GTEX-1AYD5-1226-SM-GW1EA	Lung	50-59	0.110777	774.457	0.0444595	0.117028	-1.36462	0.0472416	0.215213
GTEX-1B98T-1226-SM-GW1S5	Lung	60-69	0.20634	3256.42	0.0866999	0.230181	7.10789	0.0544905	0.254871
GTEX-1BAJH-1326-SM-GW1FE	Lung	70-79	0.19346	3006.21	0.0837194	0.200885	7.86854	0.0586892	0.240023
GTEX-1C4CL-0826-SM-GW1D4	Lung	30-39	0.111042	669.422	0.0442355	0.116769	-1.16069	0.0476519	0.21249
GTEX-1C64N-1126-SM-GW1CB	Lung	50-59	0.154007	1860.57	0.0650151	0.167397	-0.0462888	0.0496431	0.20973
GTEX-1C64O-1226-SM-GW1TA	Lung	60-69	0.0994526	982.389	0.0475656	0.118923	-2.3745	0.0451773	0.191307
GTEX-1CAMQ-1026-SM-GW1QU	Lung	40-49	0.0868383	542.213	0.0411092	0.104213	-2.88528	0.0465288	0.195491
GTEX-1CAV2-0626-SM-GW29Z	Lung	40-49	0.130182	1259.01	0.0543792	0.142425	-3.18878	0.0532764	0.205717
GTEX-1E1VI-0926-SM-GW1DZ	Lung	50-59	0.11631	848.813	0.045962	0.125657	-3.2685	0.0412533	0.196151
GTEX-1EN7A-0826-SM-GW1R8	Lung	40-49	0.1285	1214.46	0.0539743	0.130216	0.407974	0.0511405	0.213617
GTEX-1F52S-0726-SM-GW1QO	Lung	60-69	0.152625	1965.47	0.0658204	0.162215	3.88832	0.0517305	0.232653
GTEX-1F5PK-0526-SM-GW189	Lung	50-59	0.0949614	966.748	0.047393	0.124184	-2.16054	0.0542511	0.216827
GTEX-1F6I4-1026-SM-GW1WX	Lung	60-69	0.160876	1193.4	0.0519931	0.145996	0.061083	0.0433524	0.202491
GTEX-1F6IF-1826-SM-GW1EE	Lung	60-69	0.0865922	398.338	0.038012	0.105371	-4.98497	0.0465379	0.204809
GTEX-1F75B-1026-SM-GW2D8	Lung	50-59	0.116757	1060.01	0.0510809	0.118676	2.1375	0.0586833	0.243884
GTEX-1F75W-0626-SM-GW2D9	Lung	60-69	0.108273	814.479	0.0466487	0.112325	-2.11588	0.0486556	0.201784
GTEX-1F88E-0226-SM-GW1TM	Lung	60-69	0.111317	857.585	0.0457037	0.128434	-1.44887	0.0449586	0.198151
GTEX-1GL5R-0526-SM-GW1DT	Lung	50-59	0.121578	1018.61	0.0503979	0.124932	1.57361	0.0501538	0.23507
GTEX-1GMR2-0126-SM-GW1WR	Lung	50-59	0.0747815	86.6346	0.0318185	0.0927147	-1.60025	0.0496456	0.215798
GTEX-1GMR3-0226-SM-GW1C2	Lung	40-49	0.146077	1373.43	0.0545324	0.129713	-2.02535	0.0508725	0.187693
GTEX-1GN1W-1026-SM-GW17F	Lung	50-59	0.0909279	514.949	0.0400053	0.103607	-6.48243	0.0447646	0.16885
GTEX-1GPI6-0726-SM-GW2D7	Lung	60-69	0.134398	1067.54	0.0489025	0.122004	-1.93715	0.0483595	0.214509
GTEX-1GTWX-0626-SM-GW1S8	Lung	60-69	0.118704	1187.93	0.0526414	0.130352	0.269754	0.0531322	0.226195
GTEX-1GZHY-0826-SM-GW1RD	Lung	50-59	0.115904	1017.28	0.049958	0.122667	-2.13404	0.0463087	0.212884
GTEX-1H11D-0726-SM-GW1XA	Lung	40-49	0.103976	350.137	0.037395	0.102459	-4.08262	0.042844	0.173974
GTEX-1H1DF-1226-SM-GW1D5	Lung	40-49	0.224171	2559.61	0.0764789	0.182624	2.83719	0.0608335	0.254401
GTEX-1H23P-1026-SM-GW1WW	Lung	60-69	0.142012	1207.78	0.0510616	0.140827	-1.48518	0.0439794	0.196131
GTEX-1H3VE-1026-SM-GW2CS	Lung	40-49	0.0868127	689.922	0.0441886	0.10517	-1.5178	0.050565	0.200931
GTEX-1H3VY-1426-SM-GW2CN	Lung	50-59	0.115555	816.551	0.0462754	0.123564	0.0775609	0.04548	0.20558
GTEX-1HB9E-0726-SM-GW1XB	Lung	50-59	0.124822	935.664	0.046051	0.128954	0.211389	0.0491218	0.211157
GTEX-1HCVE-0626-SM-GW1CF	Lung	50-59	0.120895	1509.53	0.0576852	0.142941	3.09805	0.0577	0.258648
GTEX-1HR9M-0826-SM-GW18A	Lung	60-69	0.0903634	585.209	0.0401061	0.115964	-2.08866	0.0479113	0.206822
GTEX-1I6K6-0926-SM-GW2CT	Lung	30-39	0.118104	1121.75	0.0520576	0.11426	0.956556	0.0597259	0.238383
GTEX-1IDJI-0626-SM-GW1WO	Lung	50-59	0.0857632	342.332	0.0376135	0.08969	-6.00006	0.0428717	0.166704
GTEX-1IDJU-0226-SM-GW1T6	Lung	60-69	0.0875279	520.608	0.0403457	0.107437	-2.73865	0.0437688	0.192571
GTEX-1IGQW-0726-SM-GW1CE	Lung	60-69	0.100334	763.806	0.0440624	0.123191	-3.13152	0.0448137	0.199611
GTEX-1IKJJ-0926-SM-GW1DJ	Lung	60-69	0.115819	1005.24	0.0484121	0.112972	-2.84045	0.0452444	0.21249
GTEX-1IKK5-1926-SM-GW1QN	Lung	60-69	0.143178	1673.97	0.0587852	0.14069	0.364046	0.0504924	0.207638
GTEX-1IL2U-0926-SM-GW1DV	Lung	60-69	0.156342	1680.12	0.0586099	0.16168	-1.29137	0.045473	0.223291
GTEX-1J1OQ-0926-SM-GW21Y	Lung	40-49	0.0845511	-9.84611	0.0308574	0.0676101	-9.1833	0.0638279	0.147902
GTEX-1J1R8-0226-SM-GW1C1	Lung	40-49	0.13086	1319.38	0.0545463	0.123024	-2.09497	0.0497086	0.198539
GTEX-1J8JJ-1126-SM-GW1Q2	Lung	60-69	0.178836	2058.73	0.0683771	0.164193	1.08013	0.0524526	0.219429
GTEX-1J8Q3-0826-SM-GW1TO	Lung	60-69	0.125041	1299.17	0.053515	0.13788	-1.42094	0.0450332	0.206418
GTEX-1JK1U-1126-SM-GW1VL	Lung	60-69	0.14947	1272.83	0.0542805	0.139965	-0.012637	0.0494588	0.212797
GTEX-1JMOU-0526-SM-GW2CI	Lung	60-69	0.140261	1520.97	0.0580408	0.140138	2.28027	0.058408	0.243024
GTEX-1JMQJ-2126-SM-GW2D5	Lung	50-59	0.125901	1264.22	0.0536032	0.12966	-0.813117	0.0489637	0.21885
GTEX-1JN76-0826-SM-GW1SB	Lung	20-29	0.0654615	106.726	0.0333475	0.0795804	-7.08946	0.04667	0.17105
GTEX-1KXAM-0426-SM-GW2CW	Lung	60-69	0.119302	1073.18	0.0509738	0.123106	-2.16223	0.0497388	0.206678
GTEX-1L5NE-0726-SM-GW17C	Lung	50-59	0.11081	838.579	0.0465607	0.121877	-3.55064	0.0494653	0.188858
GTEX-1LC47-1126-SM-GW2CJ	Lung	60-69	0.105033	863.588	0.0464101	0.105195	-1.17131	0.0557474	0.21443
GTEX-1LG7Y-0826-SM-GW2D2	Lung	50-59	0.0932143	688.748	0.0438963	0.10813	-0.037977	0.0462402	0.215021
GTEX-1LSNL-1126-SM-GW2D6	Lung	50-59	0.129462	1195.83	0.05337	0.12705	0.999494	0.0473563	0.213769
GTEX-1LSVX-0626-SM-GW2CX	Lung	60-69	0.118083	991.844	0.0494933	0.133207	0.405599	0.0523513	0.229229
GTEX-1LVA9-1126-SM-GW2D1	Lung	50-59	0.229899	2954.91	0.0824485	0.186275	5.61552	0.0564172	0.244364
GTEX-1LVAO-1226-SM-GW2D4	Lung	60-69	0.130601	1200.99	0.0519286	0.139461	3.19955	0.058213	0.255998
GTEX-1MCC2-0726-SM-GW2CC	Lung	30-39	0.103853	1173.5	0.0529873	0.120194	-2.00927	0.0540792	0.212925
GTEX-1MGNQ-0826-SM-GW2D3	Lung	40-49	0.0988361	713.566	0.0435477	0.109983	-3.30526	0.0430439	0.196294
GTEX-1MJK2-1126-SM-GW179	Lung	50-59	0.124823	1204.1	0.0524573	0.137818	-2.14925	0.0504275	0.18669
GTEX-1N2EE-1626-SM-GW17A	Lung	60-69	0.137788	946.526	0.0487336	0.134486	0.150943	0.0467005	0.205201
GTEX-1N5O9-1226-SM-GW17M	Lung	60-69	0.108232	635.355	0.044232	0.110586	-3.46684	0.0486515	0.166294
GTEX-1N7R6-0726-SM-GW1W9	Lung	20-29	0.054022	-222.877	0.0265616	0.0542726	-11.6468	0.0387622	0.121426
GTEX-1NHNU-0426-SM-GW1ZY	Lung	50-59	0.0797723	378.782	0.0381663	0.105365	-6.19529	0.0416464	0.184099
GTEX-1NUQO-1026-SM-GW2CK	Lung	20-29	0.0970364	475.342	0.0405138	0.0936304	-3.83448	0.0474349	0.201467
GTEX-1O97I-1526-SM-GW2CY	Lung	60-69	0.117693	1204.47	0.0534942	0.124216	1.45122	0.0533371	0.224381
GTEX-1OFPY-0226-SM-GW2CZ	Lung	60-69	0.100155	1021.78	0.0483764	0.111697	-2.90698	0.0468343	0.180291
GTEX-1OJC3-0726-SM-GW1W7	Lung	20-29	0.0804685	222.825	0.0350277	0.081585	-4.02849	0.042752	0.171512
GTEX-1OZHM-0826-SM-GW18Y	Lung	40-49	0.0544582	-404.01	0.0241698	0.0700363	-13.5486	0.0504038	0.115255
GTEX-1PBJJ-1326-SM-GW1VU	Lung	30-39	0.128357	1284.33	0.0535236	0.133734	0.229233	0.0496038	0.196251
GTEX-1QCLY-1026-SM-GW2CF	Lung	30-39	0.0834305	620.344	0.0430013	0.104296	-3.06947	0.0513962	0.213492
GTEX-1QMI2-0926-SM-GW178	Lung	60-69	0.171827	2481.92	0.0704906	0.170112	3.10935	0.0524698	0.217262
GTEX-1R46S-1226-SM-GW2CU	Lung	60-69	0.105771	870.263	0.0468715	0.10691	-0.98771	0.0523633	0.182111
GTEX-1RAZR-0726-SM-GW1VY	Lung	40-49	0.169686	1513	0.0585481	0.126862	1.85066	0.0574154	0.199145
GTEX-RUSQ-0626-SM-GW19E	Lung	50-59	0.112483	973.131	0.0480733	0.115274	-0.641998	0.0554922	0.20457
GTEX-RVPU-0526-SM-GW19H	Lung	50-59	0.132232	1369.76	0.0551029	0.134682	-0.208285	0.0510785	0.211186
GTEX-RVPV-1726-SM-GW1XI	Lung	60-69	0.0993409	350.372	0.0368703	0.0965473	-5.48039	0.0481114	0.183301
GTEX-S33H-0626-SM-GW1ZK	Lung	30-39	0.0864629	333.219	0.0369628	0.0949992	-4.82595	0.0467332	0.202323
GTEX-S341-0326-SM-GW23W	Lung	40-49	0.0963631	378.146	0.0390235	0.114079	-4.30348	0.0455632	0.204879
GTEX-S4Z8-0426-SM-GW2DD	Lung	60-69	0.105661	597.886	0.0409886	0.1078	-0.760367	0.0504661	0.22639
GTEX-S7SE-0926-SM-GW181	Lung	50-59	0.242071	3253.97	0.0855394	0.204253	12.3741	0.0644797	0.285908
GTEX-SIU8-0926-SM-GW2A7	Lung	50-59	0.217546	2273.01	0.0696163	0.170288	2.58325	0.052167	0.237112
GTEX-SN8G-0926-SM-GW23D	Lung	50-59	0.177512	2034.33	0.0685048	0.168741	2.69893	0.0486297	0.223732
GTEX-SNOS-0426-SM-GW1SU	Lung	40-49	0.102679	815.394	0.0462826	0.105552	-2.63579	0.05085	0.197704
GTEX-T2YK-0826-SM-GW1A9	Lung	50-59	0.146826	1346.04	0.0551353	0.127855	-0.603647	0.0527604	0.204539
GTEX-T6MO-0426-SM-GW1GH	Lung	40-49	0.0815141	317.82	0.0367717	0.0763517	-8.73662	0.0447097	0.159712
GTEX-T8EM-0326-SM-GW1ZN	Lung	40-49	0.0863523	647.627	0.0425922	0.107414	-2.18096	0.0478698	0.208656
GTEX-TSE9-0726-SM-GW1WE	Lung	60-69	0.093146	470.744	0.0385942	0.113345	-2.40279	0.0472996	0.217038
GTEX-U3ZH-0526-SM-GW19I	Lung	30-39	0.0932517	407.092	0.0399498	0.0984087	-1.00417	0.0527081	0.195065
GTEX-U3ZM-0426-SM-GW2BF	Lung	40-49	0.0959958	374.496	0.0385571	0.0997003	-3.81507	0.0526421	0.190224
GTEX-U8T8-2226-SM-GW17X	Lung	60-69	0.097282	844.874	0.0460353	0.123868	-0.877627	0.0518109	0.203679
GTEX-U8XE-1426-SM-GW1VC	Lung	30-39	0.0774001	97.1471	0.0327018	0.0917477	-2.1217	0.0411329	0.205259
GTEX-UJHI-0726-SM-GW1W5	Lung	50-59	0.0893288	286.008	0.0360638	0.104318	-4.39987	0.044035	0.187555
GTEX-UPJH-0826-SM-GW19D	Lung	50-59	0.117542	1169.44	0.0525432	0.123765	-0.306112	0.0511437	0.205165
GTEX-UPK5-1126-SM-GW2BY	Lung	40-49	0.0643175	-192.985	0.0268295	0.078063	-2.46632	0.0417712	0.205461
GTEX-W5X1-0526-SM-GW241	Lung	40-49	0.147971	1190.26	0.0534307	0.1443	-2.17626	0.0556624	0.208499
GTEX-WFG8-0926-SM-GW18N	Lung	20-29	0.0742371	97.345	0.0329393	0.0794726	-4.63419	0.0427401	0.177864
GTEX-WH7G-0726-SM-GW18W	Lung	40-49	0.1106	434.838	0.03894	0.100527	-3.37256	0.0488304	0.180546
GTEX-WHWD-0626-SM-GW1B4	Lung	50-59	0.0907913	538.104	0.040854	0.0982402	-4.7505	0.0458533	0.195511
GTEX-WK11-0526-SM-GW18G	Lung	50-59	0.117515	863.151	0.046502	0.12299	3.92363	0.0483275	0.227926
GTEX-WOFL-1126-SM-GW29K	Lung	60-69	0.0837669	2.83923	0.031741	0.082822	-5.66023	0.0436087	0.183111
GTEX-WQUQ-1126-SM-GW184	Lung	60-69	0.117247	864.14	0.0453685	0.114596	-4.48061	0.0451465	0.189814
GTEX-WRHU-0226-SM-GW18F	Lung	50-59	0.151162	1164.4	0.0498696	0.128294	0.453657	0.0482498	0.222417
GTEX-WVLH-0826-SM-GW182	Lung	50-59	0.133313	1017.55	0.0484946	0.129792	-1.04676	0.0472061	0.205188
GTEX-WWYW-0926-SM-GW186	Lung	50-59	0.214991	3428.66	0.0865131	0.187288	4.05419	0.0533729	0.233813
GTEX-WXYG-0726-SM-GW18D	Lung	50-59	0.0920269	195.272	0.0352294	0.095979	-4.88184	0.0444037	0.187721
GTEX-WY7C-0426-SM-GW1VR	Lung	50-59	0.104661	791.458	0.0435195	0.112405	0.121162	0.0472847	0.235282
GTEX-WYBS-1126-SM-GW1Z1	Lung	60-69	0.174357	2486.86	0.072997	0.168008	2.96909	0.0569662	0.207046
GTEX-WZTO-0426-SM-GW1TS	Lung	40-49	0.132862	1174.91	0.0519464	0.12586	-0.690499	0.0473729	0.223976
GTEX-X261-1026-SM-GW18Q	Lung	50-59	0.123852	613.234	0.0415766	0.119036	0.563592	0.045471	0.212624
GTEX-X4EO-0926-SM-GW1Z5	Lung	60-69	0.236879	3575.77	0.092015	0.213761	17.009	0.082451	0.327305
GTEX-X4EP-0526-SM-GW18O	Lung	60-69	0.0960957	365.466	0.0366588	0.0960279	-0.0441075	0.0400695	0.193799
GTEX-X4XY-1026-SM-GW18J	Lung	60-69	0.243098	3119.15	0.0840291	0.19992	11.8356	0.0677474	0.28392
GTEX-X5EB-0426-SM-GW18S	Lung	40-49	0.0906257	170.268	0.0330987	0.0858337	-7.38674	0.0389127	0.15684
GTEX-X62O-0726-SM-GW1ER	Lung	50-59	0.105062	1010.38	0.0480602	0.107905	-1.21929	0.0495432	0.198417
GTEX-X8HC-0926-SM-GW183	Lung	50-59	0.0955006	384.8	0.0375626	0.108425	-1.13456	0.0432474	0.200523
GTEX-XBEC-1026-SM-GW18I	Lung	50-59	0.111381	660.316	0.042958	0.117126	-0.988262	0.046174	0.207355
GTEX-XBED-0826-SM-GW17W	Lung	60-69	0.0944793	665.668	0.0436037	0.0976946	-4.85695	0.0466819	0.161527
GTEX-XMD1-1026-SM-GW1VA	Lung	60-69	0.096253	530.254	0.0397304	0.113174	-3.82835	0.0428502	0.184167
GTEX-XPT6-1226-SM-GW2AZ	Lung	20-29	0.0821557	-17.3375	0.0315044	0.0655244	-8.88481	0.0405846	0.157312
GTEX-XPVG-1026-SM-GW1B6	Lung	50-59	0.0963743	623.057	0.0419146	0.112986	-0.905574	0.0475021	0.19594
GTEX-XQ3S-0926-SM-GW1CL	Lung	20-29	0.066887	-50.6139	0.0300001	0.0737818	-4.18753	0.0405954	0.173391
GTEX-XUJ4-1426-SM-GW22Z	Lung	60-69	0.121823	504.574	0.0410249	0.0946048	-7.18467	0.0500266	0.14988
GTEX-XV7Q-0426-SM-GW1TT	Lung	40-49	0.0852111	316.756	0.0367205	0.0835402	-8.76121	0.0428945	0.149697
GTEX-XYKS-0526-SM-GW18H	Lung	60-69	0.165558	1728.15	0.0601123	0.162302	3.56994	0.0532416	0.215195
GTEX-YB5E-0726-SM-GW2CQ	Lung	40-49	0.0814302	455.56	0.039568	0.0896891	-0.812686	0.0491426	0.196948
GTEX-YEC3-0226-SM-GW17H	Lung	50-59	0.0821537	313.148	0.0361111	0.09796	-2.2672	0.0460296	0.209647
GTEX-YFC4-1126-SM-GW2BS	Lung	40-49	0.103243	316.568	0.0379581	0.0953655	-2.26313	0.0473052	0.189837
GTEX-YFCO-0426-SM-GW1FK	Lung	40-49	0.123092	1046.32	0.0492848	0.131779	-2.40411	0.0457489	0.209569
GTEX-YJ89-0826-SM-GW1FD	Lung	60-69	0.119309	1052.04	0.0495258	0.126332	-0.805038	0.05031	0.213211
GTEX-Z93S-0626-SM-GW18C	Lung	50-59	0.153466	1440.74	0.0553214	0.141879	2.9873	0.0474014	0.238644
GTEX-ZAB4-0626-SM-GW1G5	Lung	40-49	0.150423	1830.44	0.0641854	0.155782	4.62868	0.0545853	0.237129
GTEX-ZDTS-1026-SM-GW23S	Lung	60-69	0.209773	3168.96	0.0854716	0.189684	-0.246156	0.049774	0.209184
GTEX-ZDXO-1326-SM-GW21U	Lung	60-69	0.108199	582.194	0.0421562	0.112423	-0.798018	0.0491481	0.213004
GTEX-ZYFG-0226-SM-GW1G9	Lung	60-69	0.194726	2282.86	0.0712496	0.175257	7.02784	0.0567521	0.254568
GTEX-ZYY3-0926-SM-GW1XT	Lung	60-69	0.133087	689.248	0.0421247	0.126017	-6.93929	0.0364476	0.185508
GTEX-11XUK-2226-SM-GW2AB	Muscle-Skeletal	40-49	0.0918225	-107.183	0.0303461	0.134688	-3.91817	0.0626798	0.279264
GTEX-12584-0526-SM-GW1W4	Muscle-Skeletal	40-49	0.0673575	-306.963	0.0257778	0.129947	-5.86721	0.0573603	0.277666
GTEX-12WSF-0926-SM-GW2AE	Muscle-Skeletal	70-79	0.0885862	-68.2899	0.0312587	0.139683	-5.55461	0.0613807	0.277232
GTEX-13RTJ-2726-SM-GW22R	Muscle-Skeletal	60-69	0.10251	-102.921	0.030534	0.136233	-4.89876	0.0642624	0.27514
GTEX-13SLX-0326-SM-GW1V9	Muscle-Skeletal	50-59	0.0856562	115.054	0.0348127	0.137039	-4.57744	0.0683206	0.275724
GTEX-13X6I-0526-SM-GW1GF	Muscle-Skeletal	60-69	0.0759301	-67.3961	0.0310678	0.138003	-7.36173	0.0604844	0.274734
GTEX-13X6K-0326-SM-GW1AG	Muscle-Skeletal	60-69	0.0750399	-33.337	0.0316832	0.13844	-4.12423	0.0640909	0.266333
GTEX-14753-0526-SM-GW1QL	Muscle-Skeletal	60-69	0.0787521	-120.133	0.0302563	0.129386	-5.34838	0.0590425	0.269834
GTEX-147GR-0126-SM-GW1T2	Muscle-Skeletal	60-69	0.0777163	-69.2824	0.0312652	0.12652	-5.95076	0.0614543	0.278522
GTEX-148VJ-0326-SM-GW1GP	Muscle-Skeletal	70-79	0.10208	333.525	0.0373634	0.1501	-4.76586	0.0637844	0.278499
GTEX-14A5H-0326-SM-GW1T1	Muscle-Skeletal	60-69	0.0914642	120.486	0.03468	0.136939	-5.56835	0.0607546	0.266241
GTEX-14B4R-1726-SM-GW1AZ	Muscle-Skeletal	30-39	0.0785742	-5.59354	0.0326093	0.129188	-5.01853	0.0661098	0.264107
GTEX-15D1Q-0926-SM-GW1S6	Muscle-Skeletal	40-49	0.0776566	-82.1731	0.0318324	0.125486	-0.206595	0.0709729	0.310653
GTEX-15DCD-0626-SM-GW1R4	Muscle-Skeletal	70-79	0.100021	140.577	0.0348729	0.146793	-6.00394	0.0592501	0.28215
GTEX-15SHU-0626-SM-GW1RF	Muscle-Skeletal	40-49	0.0902817	35.3591	0.0335881	0.144224	-6.16185	0.0566482	0.271569
GTEX-1F6IF-0226-SM-GW1QW	Muscle-Skeletal	60-69	0.0787354	-110.998	0.0302868	0.133645	-2.26462	0.0648469	0.286609
GTEX-1F75B-0526-SM-GW1CD	Muscle-Skeletal	50-59	0.0851737	64.6862	0.03368	0.134946	-6.36269	0.0624561	0.276703
GTEX-1F88E-1826-SM-GW1QK	Muscle-Skeletal	60-69	0.0892611	10.4768	0.0329149	0.138073	-5.81157	0.0605988	0.276492
GTEX-1GPI6-0326-SM-GW1QV	Muscle-Skeletal	60-69	0.10201	339.665	0.0387911	0.156104	-2.60452	0.0692283	0.290012
GTEX-1H1ZS-0626-SM-GW1DG	Muscle-Skeletal	70-79	0.0847462	-5.45737	0.0324103	0.132999	-4.62856	0.0627246	0.287505
GTEX-1H3NZ-0326-SM-GW1D6	Muscle-Skeletal	60-69	0.0913825	-88.8775	0.0314557	0.141105	-6.16979	0.0584051	0.279521
GTEX-1H3O1-0626-SM-GW1RV	Muscle-Skeletal	60-69	0.089948	66.9527	0.0333415	0.132155	-3.27011	0.0666834	0.289621
GTEX-1IKOE-0326-SM-GW1E1	Muscle-Skeletal	30-39	0.0647637	-92.3267	0.0302952	0.125255	-6.52905	0.0624454	0.268576
GTEX-1J8QM-2226-SM-GW1GN	Muscle-Skeletal	60-69	0.080584	-6.605	0.0321035	0.131206	-4.47583	0.0622212	0.26626
GTEX-SNOS-1526-SM-GW24A	Muscle-Skeletal	40-49	0.0638695	-345.989	0.0255222	0.112391	-10.1713	0.0574021	0.243245
GTEX-T6MO-1826-SM-GW1Y2	Muscle-Skeletal	40-49	0.0727739	-225.082	0.0277014	0.114681	-3.74713	0.062773	0.271203
GTEX-T8EM-1326-SM-GW2BQ	Muscle-Skeletal	40-49	0.0701599	-328.992	0.025403	0.120328	-5.29761	0.0621206	0.274084
GTEX-U3ZH-1926-SM-GW1XZ	Muscle-Skeletal	30-39	0.0763095	-242.187	0.0272592	0.130857	-4.30547	0.0697292	0.293468
GTEX-W5WG-1926-SM-GW2AV	Muscle-Skeletal	50-59	0.081813	-51.6148	0.0312288	0.130784	-4.66559	0.0587806	0.275113
GTEX-W5X1-2726-SM-GW19S	Muscle-Skeletal	40-49	0.0872652	14.669	0.0330445	0.135758	-6.25179	0.0684783	0.267804
GTEX-WOFL-0626-SM-GW1G1	Muscle-Skeletal	60-69	0.080695	-25.7485	0.0314752	0.12462	-5.80884	0.0640109	0.287761
GTEX-WWYW-0526-SM-GW194	Muscle-Skeletal	50-59	0.0848814	-25.9542	0.0325606	0.127754	-4.16492	0.0736815	0.263701
GTEX-WYBS-0526-SM-GW1Y3	Muscle-Skeletal	60-69	0.0823287	-233.089	0.0275175	0.142029	-6.67827	0.0613335	0.273032
GTEX-X4EO-0526-SM-GW1XH	Muscle-Skeletal	60-69	0.0848966	-196.226	0.0283213	0.148818	-7.11427	0.0587891	0.272347
GTEX-X4EP-0926-SM-GW1XJ	Muscle-Skeletal	60-69	0.100437	-190.144	0.029216	0.143117	-4.75066	0.0591647	0.267794
GTEX-X4XY-0626-SM-GW1XO	Muscle-Skeletal	60-69	0.0705299	-127.297	0.0291914	0.122804	-3.26916	0.0657398	0.288072
GTEX-X585-0626-SM-GW227	Muscle-Skeletal	50-59	0.0946188	-144.724	0.0305677	0.132	0.637428	0.0655867	0.286973
GTEX-X5EB-2326-SM-GW1TW	Muscle-Skeletal	40-49	0.0738616	-186.677	0.0285159	0.136815	-7.35951	0.0569714	0.260872
GTEX-X62O-1226-SM-GW1ZE	Muscle-Skeletal	50-59	0.069821	99.7857	0.0340546	0.13988	-4.78404	0.0639135	0.276364
GTEX-XMD1-0626-SM-GW19T	Muscle-Skeletal	60-69	0.0746013	77.3548	0.0340133	0.137396	-4.74798	0.0677198	0.274157
GTEX-XMD2-0526-SM-GW1Y1	Muscle-Skeletal	60-69	0.0790839	-148.305	0.0296617	0.136277	-2.55869	0.068184	0.308727
GTEX-XMK1-2326-SM-GW1SM	Muscle-Skeletal	40-49	0.0938021	185.476	0.0365677	0.123685	-3.55842	0.0679946	0.284231
GTEX-XV7Q-2926-SM-GW1TR	Muscle-Skeletal	40-49	0.0778941	-112.345	0.0306069	0.131952	-3.71941	0.0632974	0.28633
GTEX-XYKS-2426-SM-GW1W1	Muscle-Skeletal	60-69	0.0906688	-93.8372	0.0307158	0.135547	-6.7589	0.0714399	0.275748
GTEX-Y111-0326-SM-GW1Z6	Muscle-Skeletal	50-59	0.0827566	-87.0594	0.0309812	0.119775	-7.37744	0.0640535	0.255513
GTEX-ZVZP-2526-SM-GW1EJ	Muscle-Skeletal	50-59	0.099124	172.694	0.0355642	0.136886	-2.72104	0.0740709	0.290305
GTEX-ZVZQ-0526-SM-GW2A9	Muscle-Skeletal	60-69	0.0754793	-267.498	0.0268545	0.13758	-2.52163	0.0673659	0.30602
GTEX-11EM3-1726-SM-GW199	Ovary	20-29	0.0520332	-193.459	0.0288963	0.062195	-4.52979	0.0720487	0.227384
GTEX-11EMC-1726-SM-GW2AF	Ovary	60-69	0.0502323	-373.648	0.0258852	0.074263	-7.82793	0.0620912	0.243366
GTEX-11GSP-0226-SM-GW1Q3	Ovary	60-69	0.0564656	-253.208	0.0281994	0.0763608	-4.91349	0.0597833	0.227159
GTEX-11I78-1926-SM-GW2BI	Ovary	50-59	0.0456459	-369.84	0.0242905	0.0653208	-2.11442	0.06986	0.268854
GTEX-11VI4-1026-SM-GW223	Ovary	40-49	0.0607601	-220.894	0.0287549	0.0758713	-1.59048	0.0853536	0.271002
GTEX-11XUK-1626-SM-GW1YD	Ovary	40-49	0.0502766	-242.844	0.0279173	0.0614906	-5.25212	0.0746088	0.249357
GTEX-11ZTS-1926-SM-GW1GA	Ovary	60-69	0.0559022	-238.539	0.0279817	0.0874888	-6.73371	0.0570309	0.222541
GTEX-11ZTT-1826-SM-GW1BG	Ovary	60-69	0.0472333	-304.898	0.025977	0.0656093	-6.94918	0.0558802	0.231533
GTEX-12WSD-2726-SM-GW1UA	Ovary	60-69	0.0516517	-270.244	0.0277902	0.0668438	-6.01443	0.0609037	0.233358
GTEX-12WSG-1426-SM-GW1FC	Ovary	50-59	0.0540149	-5.63018	0.0314899	0.0737017	-5.03201	0.0661423	0.242828
GTEX-12WSJ-1226-SM-GW2BN	Ovary	40-49	0.0411318	-474.637	0.0237697	0.0658238	-3.39397	0.0724633	0.259809
GTEX-12WSK-1926-SM-GW1AP	Ovary	40-49	0.0428368	-411.932	0.0247622	0.0703459	-6.56754	0.0764546	0.235464
GTEX-12ZZX-2026-SM-GW222	Ovary	40-49	0.039231	-525.653	0.0218763	0.0596158	-4.4455	0.0706735	0.249918
GTEX-133LE-1226-SM-GW1A3	Ovary	20-29	0.0437477	-345.472	0.0257965	0.0657454	-8.75015	0.0563453	0.207741
GTEX-1399U-1726-SM-GW1CW	Ovary	50-59	0.046521	-427.667	0.0244962	0.060125	-5.65658	0.0670958	0.24429
GTEX-13FTY-1826-SM-GW23X	Ovary	40-49	0.0745611	-60.1473	0.0302289	0.0813422	-3.08704	0.0622108	0.259457
GTEX-13N11-0526-SM-GW1A6	Ovary	50-59	0.0623693	-60.4684	0.0317518	0.0762955	-5.47525	0.062469	0.234323
GTEX-13O3O-2726-SM-GW29N	Ovary	60-69	0.0617981	-28.1473	0.0323199	0.0783043	-8.76724	0.064372	0.239043
GTEX-13OVJ-2426-SM-GW2BA	Ovary	50-59	0.0591551	-323.741	0.0256681	0.0748014	-4.55131	0.0588421	0.242638
GTEX-13PL7-2326-SM-GW1Z9	Ovary	60-69	0.050229	-340.176	0.0255056	0.0732032	-12.4529	0.0500411	0.201709
GTEX-13QBU-1526-SM-GW1YG	Ovary	40-49	0.0553554	-154.905	0.0298113	0.0672307	-3.15986	0.0725554	0.260604
GTEX-13QIC-1526-SM-GW1D8	Ovary	60-69	0.0509911	-364.452	0.0249637	0.0688316	-8.35628	0.0602488	0.230422
GTEX-13QJC-1526-SM-GW29O	Ovary	60-69	0.0802799	-28.5197	0.031889	0.105451	-16.8506	0.0488628	0.210298
GTEX-13SLX-2426-SM-GW1EY	Ovary	50-59	0.0593139	-181.93	0.0291616	0.0713325	-3.04444	0.0747045	0.252839
GTEX-13VXT-1526-SM-GW1ZA	Ovary	20-29	0.0415624	-508.839	0.0226008	0.0595852	-4.22945	0.0665569	0.256301
GTEX-13X6H-1026-SM-GW24H	Ovary	50-59	0.0430713	-594.671	0.0213277	0.0577987	-12.7218	0.0718021	0.214249
GTEX-145LS-2326-SM-GW16E	Ovary	60-69	0.0513645	-232.675	0.0278027	0.0714952	-9.23276	0.0649253	0.220452
GTEX-145ME-1226-SM-GW1CQ	Ovary	40-49	0.048391	-364.972	0.0257805	0.0678849	-13.6539	0.0506351	0.21417
GTEX-146FH-2526-SM-GW1H1	Ovary	50-59	0.0498016	-210.632	0.0284635	0.0732012	-4.88364	0.066282	0.248308
GTEX-14AS3-1326-SM-GW16Q	Ovary	40-49	0.0516748	-342.482	0.0258532	0.0620984	-5.92711	0.0685181	0.225053
GTEX-14BIM-2026-SM-GW16J	Ovary	60-69	0.0577345	-189.151	0.0286825	0.0768156	-11.3765	0.0548292	0.205372
GTEX-14BIN-1426-SM-GW234	Ovary	50-59	0.0506313	-329.509	0.0259646	0.0644852	-8.45326	0.0585444	0.234616
GTEX-14BMU-1726-SM-GW16P	Ovary	20-29	0.0479941	-398.782	0.0245835	0.0694122	-4.56588	0.0647666	0.244928
GTEX-14DAQ-2226-SM-GW21P	Ovary	60-69	0.0379234	-668.176	0.0193562	0.0598567	-10.3443	0.0523599	0.217687
GTEX-14H4A-2226-SM-GW16W	Ovary	40-49	0.0533012	-289.109	0.0271543	0.0684832	-3.21569	0.0698795	0.236219
GTEX-14JG6-0626-SM-GW16R	Ovary	30-39	0.0509635	-347.782	0.0255973	0.0628939	-4.38303	0.0716307	0.243343
GTEX-14LZ3-2326-SM-GW1VH	Ovary	60-69	0.0653807	-208.2	0.0278866	0.100765	-14.3916	0.0560597	0.179855
GTEX-14PHW-2226-SM-GW16D	Ovary	60-69	0.0496372	-258.834	0.0279967	0.0791349	-1.3803	0.0697383	0.251692
GTEX-14PHY-1626-SM-GW237	Ovary	60-69	0.044508	-455.181	0.0241502	0.063756	-8.07492	0.0570871	0.227768
GTEX-14PJ6-1426-SM-GW16N	Ovary	60-69	0.0523763	-346.713	0.025961	0.0763738	-9.21724	0.0564595	0.212186
GTEX-14PJM-2426-SM-GW174	Ovary	50-59	0.043535	-378.857	0.0249546	0.0668443	-1.27513	0.0768032	0.261125
GTEX-14PKU-1226-SM-GW233	Ovary	40-49	0.0533932	-447.028	0.023378	0.0710135	-6.96275	0.0667622	0.233032
GTEX-14PN3-1526-SM-GW1UZ	Ovary	60-69	0.0438327	-426.659	0.0243466	0.0668432	-5.07631	0.0603675	0.243886
GTEX-14PQA-2626-SM-GW16M	Ovary	50-59	0.0528296	-196.887	0.028597	0.0669905	-5.84637	0.0667837	0.235598
GTEX-15DCD-2126-SM-GW16C	Ovary	70-79	0.0511927	-287.268	0.0265936	0.0661136	-5.94283	0.0641018	0.235823
GTEX-15DDE-2326-SM-GW1VI	Ovary	50-59	0.0497291	-303.207	0.0262856	0.0675413	-0.576009	0.0727469	0.271488
GTEX-15DYW-2626-SM-GW16A	Ovary	60-69	0.05607	-92.36	0.0316322	0.0744664	-0.341394	0.0751898	0.2593
GTEX-15EOM-1526-SM-GW16Z	Ovary	20-29	0.0460318	-401.666	0.0246421	0.0634003	-4.63087	0.0653904	0.236209
GTEX-15ER7-2326-SM-GW1VO	Ovary	20-29	0.0441067	-399.003	0.0241419	0.0596567	-5.51639	0.0679239	0.247677
GTEX-15ETS-1426-SM-GW175	Ovary	40-49	0.0556833	-219.445	0.0281311	0.0784352	-7.50041	0.056675	0.221356
GTEX-15FZZ-0826-SM-GW1VD	Ovary	30-39	0.0832248	148.249	0.0343945	0.0993136	-13.2566	0.0477623	0.19959
GTEX-15SDE-0926-SM-GW16H	Ovary	50-59	0.0548892	-125.237	0.0301	0.0670255	-5.88337	0.0697988	0.236351
GTEX-15SHU-2726-SM-GW16S	Ovary	40-49	0.0492337	-293.463	0.0265747	0.0732172	-9.55702	0.0516288	0.218546
GTEX-15UF6-2026-SM-GW21M	Ovary	70-79	0.0352912	-769.738	0.0172718	0.0537647	-4.57184	0.0697437	0.256545
GTEX-16MT8-2226-SM-GW21N	Ovary	60-69	0.0312934	-848.543	0.0159578	0.0474012	-9.4867	0.0510684	0.219189
GTEX-16NGA-0426-SM-GW16O	Ovary	40-49	0.0398323	-490.966	0.0220638	0.0550346	-8.09824	0.0587244	0.229804
GTEX-16NPV-2326-SM-GW1V1	Ovary	50-59	0.0406863	-410.268	0.0245749	0.0635627	-3.74353	0.0595352	0.242404
GTEX-17F9Y-2226-SM-GW239	Ovary	70-79	0.0517208	-355.175	0.0262304	0.0644131	-0.437374	0.0722167	0.26783
GTEX-17HG3-1826-SM-GW238	Ovary	30-39	0.047314	-453.238	0.0241217	0.069145	-3.02328	0.0700883	0.254134
GTEX-17JCI-2326-SM-GW232	Ovary	60-69	0.0440837	-505.416	0.0227218	0.0595989	-9.62438	0.0561829	0.229169
GTEX-183WM-1926-SM-GW16G	Ovary	70-79	0.0489973	-201.428	0.0280781	0.0728052	-6.12258	0.0629172	0.229058
GTEX-18A7A-2626-SM-GW16T	Ovary	50-59	0.0486474	-216.961	0.0283638	0.0577127	-8.42095	0.0629682	0.221902
GTEX-18D9A-0826-SM-GW171	Ovary	30-39	0.0442787	-447.295	0.0237083	0.0597694	-6.69488	0.0601943	0.228383
GTEX-19HZE-2226-SM-GW16V	Ovary	70-79	0.0521464	-200.041	0.02876	0.0655078	-7.31143	0.0727283	0.224198
GTEX-1A32A-2726-SM-GW1V2	Ovary	50-59	0.0482661	-484.491	0.023611	0.0637804	-6.07887	0.0571846	0.243576
GTEX-1A3MW-2726-SM-GW172	Ovary	60-69	0.0461545	-508.451	0.0222541	0.0660993	-5.47003	0.070232	0.245312
GTEX-1AMEY-0926-SM-GW16U	Ovary	30-39	0.0476535	-214.875	0.0284013	0.0711155	-9.00315	0.0619634	0.219036
GTEX-1AMFI-1426-SM-GW173	Ovary	50-59	0.0436185	-433.496	0.0240519	0.06626	-0.430235	0.0796245	0.267916
GTEX-1C475-0426-SM-GW176	Ovary	40-49	0.0539365	-238.764	0.02904	0.0803563	-12.9825	0.080251	0.188379
GTEX-1CAMS-2126-SM-GW21Q	Ovary	40-49	0.0426807	-520.639	0.0225119	0.0632875	-8.67037	0.067187	0.223181
GTEX-1CAV2-1526-SM-GW1VG	Ovary	40-49	0.0798177	-130.94	0.0292441	0.0896744	0.464655	0.0746011	0.272758
GTEX-1CB4H-2526-SM-GW1GW	Ovary	60-69	0.050971	-289.638	0.0272816	0.0791634	-4.19904	0.0628321	0.248381
GTEX-1EWIQ-2226-SM-GW16Y	Ovary	70-79	0.0502826	-161.489	0.0292245	0.0751798	-8.77337	0.0659528	0.210504
GTEX-1F48J-2326-SM-GW16X	Ovary	50-59	0.0545787	-302.774	0.0278713	0.0819303	-6.04136	0.0690091	0.223412
GTEX-1F52S-2226-SM-GW1QC	Ovary	60-69	0.0508747	-107.91	0.0307124	0.0767146	-3.20338	0.0642084	0.237462
GTEX-1F5PL-1626-SM-GW1QA	Ovary	40-49	0.0471703	-382.954	0.0250128	0.061558	-6.7741	0.0572832	0.22497
GTEX-1F6RS-2726-SM-GW1QD	Ovary	60-69	0.0536599	-179.545	0.028893	0.0732421	-6.54201	0.0576952	0.224526
GTEX-1GN1W-1426-SM-GW1Q9	Ovary	50-59	0.0518037	-313.758	0.0265203	0.0728539	-5.00151	0.0615109	0.230929
GTEX-1GZHY-2426-SM-GW1Q8	Ovary	50-59	0.0510174	-220.649	0.028109	0.0734836	-1.40949	0.0709368	0.265073
GTEX-1H1CY-1926-SM-GW1Q5	Ovary	60-69	0.0605803	90.6053	0.0342028	0.0792913	-2.10942	0.0751078	0.257069
GTEX-1H1DF-2326-SM-GW1C6	Ovary	40-49	0.0607392	-147.698	0.0295664	0.0773699	-5.13881	0.0652407	0.254736
GTEX-1H2FU-2326-SM-GW1QE	Ovary	60-69	0.0556345	-217.478	0.0292305	0.070127	-6.19858	0.0609882	0.230316
GTEX-1HBPH-2726-SM-GW169	Ovary	40-49	0.0664661	140.588	0.0316686	0.0795337	-2.46402	0.0724881	0.243903
GTEX-1HCU6-2226-SM-GW236	Ovary	60-69	0.0542081	-305.072	0.0269366	0.0710245	-8.48846	0.0546826	0.223193
GTEX-1HCU8-2126-SM-GW1EN	Ovary	60-69	0.0698673	187.911	0.0370845	0.0851683	-4.37091	0.064603	0.240329
GTEX-1HCUA-1326-SM-GW235	Ovary	50-59	0.044233	-441.378	0.0236533	0.0662887	-12.7145	0.0588722	0.206493
GTEX-1HSGN-2426-SM-GW1Q6	Ovary	40-49	0.0565136	-166.101	0.030033	0.0686072	-3.90568	0.0659055	0.251067
GTEX-1IDJE-1126-SM-GW1QB	Ovary	50-59	0.0470795	-375.571	0.0252248	0.0617466	-8.00137	0.0566373	0.225214
GTEX-1IDJI-1526-SM-GW1Q4	Ovary	50-59	0.0574867	-100.458	0.0327082	0.0818456	-2.44023	0.0723281	0.235329
GTEX-1IDJU-1126-SM-GW1VJ	Ovary	60-69	0.0485525	-353.118	0.0256861	0.0681252	-5.96727	0.0546632	0.228752
GTEX-1IKOE-2326-SM-GW21T	Ovary	30-39	0.0742123	-234.163	0.0273615	0.0742276	-1.48996	0.0796533	0.241688
GTEX-1J1OQ-1626-SM-GW1Q7	Ovary	40-49	0.06471	23.2216	0.0330649	0.0750362	-4.3231	0.066335	0.24515
GTEX-1J8JJ-0826-SM-GW16I	Ovary	60-69	0.0593097	-60.1098	0.0320657	0.0765914	-4.88593	0.0775676	0.24556
GTEX-1J8QM-1326-SM-GW21O	Ovary	60-69	0.0403319	-523.864	0.0226944	0.0675145	-8.99297	0.0573857	0.226256
GTEX-1JMOU-1626-SM-GW1W6	Ovary	60-69	0.0967924	-156.772	0.0310714	0.133288	-16.6096	0.0723009	0.198622
GTEX-1JN1M-2126-SM-GW212	Ovary	60-69	0.0451148	-346.543	0.0257279	0.0658451	-5.43499	0.0723334	0.239445
GTEX-1JN76-1426-SM-GW215	Ovary	20-29	0.0485852	-421.588	0.0245143	0.0660876	-1.39514	0.0724785	0.263841
GTEX-1K9T9-2426-SM-GW1SD	Ovary	50-59	0.0465179	-424.343	0.0251096	0.0670861	-6.48837	0.0581771	0.224117
GTEX-1KANC-1026-SM-GW1SK	Ovary	50-59	0.058231	-135.179	0.0300919	0.0692853	-5.28992	0.0658744	0.243282
GTEX-1LGOU-1026-SM-GW1SC	Ovary	20-29	0.0491083	-387.808	0.0251855	0.0633225	-3.3022	0.0677	0.245821
GTEX-1LKK1-1626-SM-GW1SI	Ovary	50-59	0.0458816	-353.875	0.0260935	0.0689142	-8.39069	0.0624643	0.226762
GTEX-1LVAM-1826-SM-GW1SL	Ovary	50-59	0.0369312	-631.807	0.0204556	0.0578671	-9.56675	0.0572853	0.230046
GTEX-1MCC2-1026-SM-GW1SA	Ovary	30-39	0.0440736	-442.094	0.0244524	0.0574874	-8.51736	0.0639596	0.231955
GTEX-1MCYP-1426-SM-GW1SJ	Ovary	20-29	0.0497676	-369.063	0.0261481	0.0582299	-6.5709	0.0691296	0.221609
GTEX-1N7R6-1826-SM-GW1VV	Ovary	20-29	0.0440115	-491.122	0.0227943	0.051055	-7.89935	0.0577517	0.223852
GTEX-1NUQO-1726-SM-GW1SE	Ovary	20-29	0.0436898	-478.495	0.0234019	0.053732	-6.8395	0.0656791	0.222295
GTEX-1NV5F-1626-SM-GW2CG	Ovary	60-69	0.0556361	-165.988	0.0298883	0.0748565	1.47406	0.0834744	0.280804
GTEX-1PBJI-2026-SM-GW1SF	Ovary	20-29	0.048469	-312.458	0.0259769	0.0757962	-2.87506	0.0686307	0.253421
GTEX-1PIEJ-1626-SM-GW1VX	Ovary	20-29	0.0504211	-279.117	0.0267441	0.0629759	-2.58362	0.0772967	0.255675
GTEX-1QEPI-2726-SM-GW216	Ovary	60-69	0.0469796	-351.041	0.0254741	0.0694103	-5.30307	0.0701078	0.246043
GTEX-1QP28-1326-SM-GW1W8	Ovary	50-59	0.0511075	-372.546	0.0250522	0.0660227	-8.08946	0.0582737	0.231236
GTEX-1QP67-1526-SM-GW2CB	Ovary	40-49	0.0618844	-113.046	0.0308238	0.0670781	-6.03275	0.0678398	0.240753
GTEX-1QPFJ-1726-SM-GW213	Ovary	30-39	0.0523257	-327.841	0.0268584	0.0652208	-3.93169	0.0661565	0.2326
GTEX-1R46S-1826-SM-GW2CE	Ovary	60-69	0.0523978	-173.576	0.0298106	0.0792475	-5.97489	0.0717431	0.252292
GTEX-1R9JW-1226-SM-GW214	Ovary	30-39	0.0466333	-352.722	0.0258483	0.0588618	-4.20573	0.0661033	0.243178
GTEX-1R9PN-0626-SM-GW1SG	Ovary	40-49	0.0436468	-453.085	0.023277	0.0583463	-3.19479	0.073615	0.25404
GTEX-1RDX4-0826-SM-GW1VW	Ovary	50-59	0.0395466	-447.304	0.0238711	0.0650337	-3.78791	0.0742263	0.264882
GTEX-1RNTQ-1726-SM-GW1SH	Ovary	20-29	0.0431354	-492.209	0.0230345	0.0559981	-2.56704	0.0659718	0.247074
GTEX-1S5ZU-2326-SM-GW1ZZ	Ovary	20-29	0.0412627	-439.923	0.0236309	0.063065	-5.51897	0.0706673	0.248607
GTEX-P4PP-2426-SM-GW23I	Ovary	30-39	0.0432074	-468.473	0.0229867	0.0567702	-14.2932	0.0543154	0.202317
GTEX-POMQ-1426-SM-GW1ZQ	Ovary	20-29	0.0459663	-339.457	0.0255418	0.0612013	-6.01111	0.0678702	0.228746
GTEX-R55G-1526-SM-GW1Y7	Ovary	40-49	0.0674711	-148.028	0.0298482	0.0925884	-14.8503	0.044524	0.20087
GTEX-RWS6-1026-SM-GW1A1	Ovary	60-69	0.050736	-224.221	0.0272704	0.0674846	-9.59645	0.0574024	0.219013
GTEX-S341-0726-SM-GW1Y6	Ovary	40-49	0.0477025	-394.298	0.0251202	0.0608444	-6.37008	0.0645156	0.236538
GTEX-S4P3-0926-SM-GW1YV	Ovary	50-59	0.047266	-396.91	0.0247378	0.0662903	-4.88495	0.0671888	0.250811
GTEX-S4UY-1026-SM-GW23C	Ovary	40-49	0.0986859	1400.96	0.0438251	0.136127	-5.66823	0.0578509	0.231543
GTEX-S7SF-1326-SM-GW2BM	Ovary	20-29	0.0439688	-564.389	0.0214478	0.0588021	1.78688	0.0793075	0.288975
GTEX-SE5C-0826-SM-GW1GG	Ovary	40-49	0.0472898	-343.747	0.0264925	0.0591883	0.128072	0.0710035	0.263328
GTEX-SN8G-2426-SM-GW1GD	Ovary	50-59	0.0504881	-316.543	0.0266247	0.0658787	-4.00951	0.0673613	0.256974
GTEX-T2IS-2026-SM-GW1ZS	Ovary	20-29	0.0487354	-408.684	0.0249974	0.0603954	-3.98101	0.0683933	0.253373
GTEX-T5JW-0426-SM-GW1BB	Ovary	20-29	0.0440481	-373.216	0.025179	0.061061	-3.81415	0.0796297	0.24323
GTEX-T6MO-1126-SM-GW18Z	Ovary	40-49	0.0593215	-197.263	0.0297259	0.0677654	-10.7477	0.0669095	0.212474
GTEX-TML8-0926-SM-GW2AN	Ovary	40-49	0.045188	-462.974	0.0236914	0.0617775	-5.94818	0.0645951	0.245793
GTEX-TMMY-1726-SM-GW2C9	Ovary	40-49	0.0429337	-623.553	0.0198859	0.0573815	-8.49529	0.0544546	0.229712
GTEX-TSE9-2226-SM-GW1VN	Ovary	60-69	0.0498773	-358.916	0.0257496	0.0652649	-5.72479	0.0609127	0.245639
GTEX-U3ZN-1026-SM-GW1U5	Ovary	30-39	0.0506552	-280.291	0.0273194	0.0677954	-4.33824	0.0629753	0.240749
GTEX-UJHI-1226-SM-GW1ZL	Ovary	50-59	0.0401295	-515.344	0.0218431	0.0572679	-2.30833	0.0669462	0.253623
GTEX-W5WG-0926-SM-GW1YX	Ovary	50-59	0.0455089	-446.992	0.0240061	0.0605413	-5.51843	0.0635162	0.246156
GTEX-WEY5-0626-SM-GW1FH	Ovary	40-49	0.0526831	-287.642	0.0276715	0.0691418	-10.4329	0.0555484	0.211979
GTEX-WI4N-2526-SM-GW1AM	Ovary	40-49	0.0548311	-269.29	0.0284611	0.0674865	-9.49205	0.0538249	0.207467
GTEX-WRHU-2026-SM-GW2BC	Ovary	50-59	0.0453057	-449.072	0.0237375	0.0639392	-6.73656	0.0612653	0.233045
GTEX-WWYW-2726-SM-GW1BC	Ovary	50-59	0.0490256	-336.637	0.027004	0.070161	-8.5223	0.0592578	0.210801
GTEX-WXYG-1426-SM-GW1H5	Ovary	50-59	0.0612076	-79.7963	0.0318412	0.0918308	-7.92753	0.053121	0.232369
GTEX-WYVS-1526-SM-GW1VM	Ovary	40-49	0.0524878	-290.082	0.027253	0.063582	-5.21928	0.0703827	0.239222
GTEX-X15G-1726-SM-GW1F5	Ovary	50-59	0.0608137	-117.648	0.0306318	0.0869043	-3.40428	0.07071	0.266018
GTEX-X4EP-2426-SM-GW23J	Ovary	60-69	0.0604333	-275.459	0.0274903	0.0811029	-4.2939	0.0638418	0.240755
GTEX-X8HC-2726-SM-GW2AL	Ovary	50-59	0.0438284	-438.515	0.0239821	0.0633704	-4.62741	0.0622871	0.246616
GTEX-XMD2-2726-SM-GW1ET	Ovary	60-69	0.0484356	-348.174	0.0260922	0.0741096	-4.82022	0.0698131	0.24823
GTEX-XOT4-2726-SM-GW2B4	Ovary	60-69	0.0521459	-242.099	0.0291662	0.0813766	-6.30359	0.0579645	0.237206
GTEX-XUJ4-1326-SM-GW1U9	Ovary	60-69	0.0453174	-440.65	0.0237443	0.064411	-2.41815	0.0731081	0.256862
GTEX-XUW1-0126-SM-GW29T	Ovary	50-59	0.0487759	-321.229	0.0260595	0.0689452	-2.16828	0.0698296	0.259498
GTEX-XUZC-1026-SM-GW1CO	Ovary	30-39	0.0521138	-323.289	0.0269903	0.0609611	-4.14146	0.0787417	0.248499
GTEX-XYKS-1726-SM-GW1Y5	Ovary	60-69	0.0516605	-289.354	0.0265123	0.0679394	-3.36648	0.0805	0.266207
GTEX-Y114-1726-SM-GW2BE	Ovary	50-59	0.0551783	-344.357	0.0261116	0.0737404	-5.545	0.0648008	0.259372
GTEX-YFC4-2726-SM-GW2C1	Ovary	40-49	0.0373362	-645.294	0.0202217	0.0567124	-4.92977	0.0578242	0.240437
GTEX-ZAJG-2726-SM-GW1Z2	Ovary	50-59	0.0566321	-217.235	0.028844	0.0681056	-12.0619	0.0573048	0.210561
GTEX-ZLWG-0926-SM-GW1GK	Ovary	50-59	0.0481322	-312.027	0.0271549	0.0609608	-1.68506	0.0709697	0.26457
GTEX-ZP4G-0626-SM-GW1H3	Ovary	20-29	0.0411577	-505.693	0.0228045	0.0563624	-1.74706	0.0722187	0.2631
GTEX-ZPIC-1426-SM-GW2B6	Ovary	40-49	0.0442495	-428.424	0.0239887	0.0626799	-10.9216	0.0495465	0.206784
GTEX-ZVT2-0326-SM-GW1B8	Ovary	50-59	0.0505954	-306.172	0.0268598	0.0852651	-4.84619	0.0651816	0.235572
GTEX-ZVT3-2626-SM-GW1FA	Ovary	60-69	0.0592217	-69.3802	0.0313356	0.089654	-5.39813	0.063635	0.241358
GTEX-ZYFG-1726-SM-GW29P	Ovary	60-69	0.0442955	-457.119	0.0237081	0.0620493	-6.12108	0.0600159	0.240749
GTEX-ZYWO-1926-SM-GW1BL	Ovary	40-49	0.0466624	-419.165	0.0247893	0.0597932	-7.29503	0.0714155	0.236027
GTEX-ZZPU-2126-SM-GW1YK	Ovary	50-59	0.0442884	-473.313	0.0237389	0.064787	-7.61499	0.0596903	0.226965
GTEX-111FC-2026-SM-GW2C2	Prostate	60-69	0.128916	1817.77	0.0516579	0.189157	-1.63262	0.0766597	0.229402
GTEX-117YW-1426-SM-GW24I	Prostate	50-59	0.241375	3284.74	0.0778771	0.235495	4.0142	0.0562939	0.244218
GTEX-1192X-2126-SM-GW1EQ	Prostate	50-59	0.142166	2442.3	0.0652039	0.202421	-0.936875	0.0572182	0.232346
GTEX-11DYG-2526-SM-GW197	Prostate	60-69	0.0920146	1600.77	0.0482318	0.158186	-2.47326	0.0677551	0.221835
GTEX-11NV4-1826-SM-GW29Q	Prostate	60-69	0.112328	1310.12	0.043586	0.173496	-3.87567	0.053346	0.214501
GTEX-11ONC-0626-SM-GW1BN	Prostate	60-69	0.158049	3153.43	0.0700945	0.219874	-1.62574	0.0624847	0.213708
GTEX-11TT1-2026-SM-GW1A8	Prostate	20-29	0.0626711	1058.48	0.0364887	0.146788	-5.51597	0.0537165	0.209686
GTEX-11UD2-2626-SM-GW2BV	Prostate	50-59	0.172464	2050.46	0.0558825	0.235793	2.15995	0.0567294	0.222689
GTEX-11WQC-1926-SM-GW1FO	Prostate	60-69	0.142161	2087.71	0.0553571	0.182558	0.770577	0.0615515	0.231087
GTEX-11WQK-2726-SM-GW1XL	Prostate	50-59	0.0809446	1275.42	0.0401528	0.165796	-6.01796	0.0503233	0.204319
GTEX-11ZU8-0526-SM-GW1AE	Prostate	60-69	0.10942	1664.29	0.0499338	0.188773	-2.14319	0.0552457	0.21654
GTEX-11ZUS-2126-SM-GW1ZD	Prostate	30-39	0.0705533	1064.87	0.0382685	0.147231	-2.21963	0.0618518	0.216379
GTEX-12696-2226-SM-GW2AG	Prostate	60-69	0.237288	3426.63	0.0840246	0.257379	3.37731	0.0583447	0.240589
GTEX-12KS4-2526-SM-GW1AD	Prostate	30-39	0.0902164	1199.69	0.0380026	0.148411	-5.14412	0.0594621	0.219385
GTEX-12WSA-2426-SM-GW1XF	Prostate	60-69	0.197154	2162.04	0.060445	0.239389	-1.0411	0.0565302	0.21969
GTEX-12WSE-2526-SM-GW1B5	Prostate	20-29	0.0636431	1032.15	0.0382455	0.151716	-5.61022	0.0549964	0.21056
GTEX-12WSF-2526-SM-GW2AW	Prostate	70-79	0.225038	3688.49	0.0893149	0.233212	7.5494	0.0686711	0.279697
GTEX-12ZZW-2626-SM-GW1A2	Prostate	50-59	0.0897082	1509.35	0.0471542	0.175205	-4.68	0.0619236	0.208426
GTEX-12ZZY-2526-SM-GW1ZO	Prostate	60-69	0.119708	1904.28	0.0491418	0.194601	-3.31695	0.0622778	0.220573
GTEX-13111-1326-SM-GW1V5	Prostate	50-59	0.121963	1996.11	0.0551586	0.173625	-3.45074	0.0502257	0.23039
GTEX-13112-2226-SM-GW1FY	Prostate	50-59	0.11464	1664.28	0.0500731	0.183429	1.52305	0.0552454	0.233284
GTEX-139TT-1726-SM-GW1G3	Prostate	60-69	0.105191	1759.98	0.0497611	0.17739	-1.49685	0.057869	0.226345
GTEX-139YR-1326-SM-GW1XY	Prostate	50-59	0.144858	1633.85	0.0432393	0.208196	-3.97723	0.0576316	0.201739
GTEX-13FHP-2726-SM-GW2A8	Prostate	50-59	0.102691	1614.91	0.0476074	0.175941	-1.52638	0.0585793	0.218129
GTEX-13FTW-1226-SM-GW21A	Prostate	40-49	0.0891079	1224.99	0.0388499	0.165051	-0.362673	0.0530578	0.217932
GTEX-13IVO-1326-SM-GW19W	Prostate	70-79	0.105572	1666.14	0.049785	0.171296	-1.54333	0.0584676	0.222584
GTEX-13N1W-2526-SM-GW1FU	Prostate	70-79	0.0929508	1508.95	0.0448479	0.171688	-1.14303	0.0599897	0.236402
GTEX-13NYS-1026-SM-GW19Z	Prostate	60-69	0.107483	1936.86	0.0551611	0.173831	-3.47144	0.0599567	0.217843
GTEX-13NZA-2226-SM-GW1FG	Prostate	60-69	0.0857613	1504.89	0.0461982	0.169059	-0.0849672	0.0630661	0.230497
GTEX-13OW5-2426-SM-GW1AL	Prostate	60-69	0.136053	1282.45	0.0488004	0.158997	-6.56466	0.0431143	0.135371
GTEX-13W46-2826-SM-GW19U	Prostate	50-59	0.119058	1625.04	0.0476812	0.197851	-2.10221	0.0600843	0.219377
GTEX-13X6I-2226-SM-GW2AR	Prostate	60-69	0.158027	2207.09	0.0624875	0.214627	-1.2924	0.0547258	0.236116
GTEX-147GR-2526-SM-GW1AW	Prostate	60-69	0.172971	3127.95	0.0746517	0.212969	-0.0281903	0.0530419	0.234984
GTEX-14BMV-2326-SM-GW1T8	Prostate	50-59	0.144691	1803.18	0.0525309	0.219258	-4.37414	0.0523102	0.196111
GTEX-14C39-2226-SM-GW1T7	Prostate	40-49	0.0922047	1512.78	0.0456875	0.178869	-2.8063	0.0610998	0.217559
GTEX-14JG1-2426-SM-GW22A	Prostate	40-49	0.0850162	1522.05	0.0437301	0.165433	0.0498281	0.0600287	0.239376
GTEX-14PJO-2826-SM-GW1BR	Prostate	60-69	0.184684	2436.45	0.0651742	0.208612	6.66141	0.0741326	0.267862
GTEX-15CHQ-2826-SM-GW1AQ	Prostate	60-69	0.273013	4344.42	0.100384	0.244685	-0.0167732	0.0560261	0.241478
GTEX-15CHR-1226-SM-GW1AU	Prostate	50-59	0.109198	1382.71	0.0466149	0.181547	-2.22892	0.0664712	0.212918
GTEX-15G1A-1326-SM-GW1TB	Prostate	30-39	0.096069	1457.15	0.0465304	0.158412	-2.58237	0.0520751	0.227169
GTEX-15SKB-2226-SM-GW1BT	Prostate	60-69	0.18597	3036.28	0.0771436	0.242908	1.21001	0.0593045	0.243977
GTEX-15SZO-2126-SM-GW1AS	Prostate	50-59	0.126147	1836.95	0.0522642	0.194122	-4.80862	0.0516481	0.20294
GTEX-15UKP-0626-SM-GW1SV	Prostate	20-29	0.0753586	1140.31	0.0401925	0.131288	-6.50087	0.054237	0.209163
GTEX-16YQH-2326-SM-GW1UM	Prostate	30-39	0.0953548	1404.7	0.044476	0.185907	-4.58933	0.054301	0.204784
GTEX-17EVQ-2626-SM-GW1WT	Prostate	70-79	0.0853306	1161.13	0.0369996	0.171178	-4.87715	0.0607437	0.213494
GTEX-17HGU-2226-SM-GW22C	Prostate	50-59	0.131875	1812.39	0.0507255	0.180895	-0.746055	0.0531607	0.224333
GTEX-1A3MV-0826-SM-GW1X5	Prostate	30-39	0.0588141	1076.34	0.0315584	0.14377	-3.66171	0.0599753	0.227882
GTEX-1B8KE-1026-SM-GW1UF	Prostate	50-59	0.085801	1319.58	0.040705	0.16303	-4.3287	0.0523943	0.203918
GTEX-1B98T-2626-SM-GW29W	Prostate	60-69	0.174549	2452.69	0.0637008	0.192838	1.66944	0.0538653	0.236906
GTEX-1CAMQ-2226-SM-GW1T9	Prostate	40-49	0.102432	1659.08	0.0472565	0.161435	1.39183	0.0620093	0.249166
GTEX-1E2YA-2226-SM-GW1XE	Prostate	50-59	0.0677911	967.99	0.0344785	0.150958	-6.83223	0.0586616	0.202233
GTEX-1F5PK-1126-SM-GW2A4	Prostate	50-59	0.0990499	1688.75	0.0489359	0.159964	-1.73436	0.0617064	0.223687
GTEX-1F6IF-0326-SM-GW1BZ	Prostate	60-69	0.123991	2260.23	0.0581861	0.179651	-3.92948	0.0560322	0.22494
GTEX-1F75A-2226-SM-GW1WY	Prostate	50-59	0.121444	1575.13	0.0463983	0.17754	-1.62597	0.0606571	0.233467
GTEX-1F75W-2526-SM-GW1UO	Prostate	60-69	0.122262	1914.25	0.0531634	0.191216	3.5237	0.0540868	0.253128
GTEX-1GL5R-1226-SM-GW1X2	Prostate	50-59	0.251653	5135.37	0.113506	0.289064	4.26233	0.0551732	0.25056
GTEX-1GMR3-1826-SM-GW1BX	Prostate	40-49	0.0928587	1450.89	0.0449385	0.182059	-5.17496	0.0547209	0.206587
GTEX-1GN73-1626-SM-GW22G	Prostate	60-69	0.111204	1723.99	0.052214	0.16943	-5.68552	0.0593945	0.199921
GTEX-1GTWX-2126-SM-GW2A5	Prostate	60-69	0.149667	2121.41	0.0570937	0.18113	-1.81611	0.0527282	0.22252
GTEX-1GZ2Q-2426-SM-GW1WZ	Prostate	40-49	0.0702324	1400.46	0.0424059	0.14688	-1.30758	0.0665152	0.250978
GTEX-1H11D-1726-SM-GW24G	Prostate	40-49	0.055415	830.176	0.0300583	0.143737	-4.05354	0.0668353	0.212852
GTEX-1H1ZS-2226-SM-GW1TQ	Prostate	70-79	0.394994	3498.91	0.0890091	0.341147	5.38876	0.0496813	0.218263
GTEX-1H3NZ-2826-SM-GW1WL	Prostate	60-69	0.0719869	1045.44	0.0386233	0.150397	-6.27112	0.0503481	0.21987
GTEX-1H3VE-2126-SM-GW1UI	Prostate	40-49	0.105464	1144.58	0.0403055	0.181851	-5.25869	0.050281	0.197139
GTEX-1HR9M-2026-SM-GW1X8	Prostate	60-69	0.192541	2384.97	0.0671532	0.212752	-7.14751	0.0447207	0.192925
GTEX-1HSKV-1726-SM-GW1X4	Prostate	60-69	0.108381	1611.45	0.047139	0.187068	-1.48597	0.0496115	0.220496
GTEX-1I6K6-2126-SM-GW1X3	Prostate	30-39	0.0791135	987.261	0.0357166	0.152372	-3.1977	0.0545176	0.22875
GTEX-1ICLY-2826-SM-GW1UJ	Prostate	50-59	0.163253	1840.91	0.0530503	0.221771	-2.08774	0.0499015	0.212857
GTEX-1IDJH-2426-SM-GW1AV	Prostate	70-79	0.231989	3306.47	0.0830995	0.249093	6.14954	0.058544	0.238807
GTEX-1IGQW-2226-SM-GW1TH	Prostate	60-69	0.0928741	1505.85	0.044269	0.154942	-4.31761	0.0502172	0.228541
GTEX-1IKJJ-2026-SM-GW1TD	Prostate	60-69	0.170915	2618.18	0.0662035	0.206166	4.21278	0.0597175	0.256298
GTEX-1IKK5-2326-SM-GW2A2	Prostate	60-69	0.208187	3197.47	0.0786092	0.249599	5.97208	0.0580396	0.229899
GTEX-1IL2U-2826-SM-GW1TN	Prostate	60-69	0.133357	2037.43	0.0550946	0.185201	4.3475	0.0612444	0.251461
GTEX-1IY9M-2426-SM-GW22N	Prostate	60-69	0.21848	2538.91	0.069163	0.249205	-3.06087	0.0554883	0.196345
GTEX-1J1R8-0726-SM-GW1UH	Prostate	40-49	0.0847166	1371.53	0.0415374	0.163884	-5.60518	0.0550711	0.214511
GTEX-1J8Q3-0926-SM-GW1X9	Prostate	60-69	0.0876939	1183.68	0.0394941	0.16038	-3.41896	0.0551121	0.216537
GTEX-RUSQ-1426-SM-GW1YP	Prostate	50-59	0.0714456	1305.49	0.0417836	0.151361	-4.39352	0.0609851	0.220988
GTEX-RVPU-1826-SM-GW1XP	Prostate	50-59	0.15635	2146.76	0.0549952	0.228045	-0.454454	0.0543345	0.21081
GTEX-RWSA-2026-SM-GW2BR	Prostate	40-49	0.0925692	1134.6	0.0416665	0.173625	-6.10317	0.0520313	0.21687
GTEX-S33H-1826-SM-GW1Y8	Prostate	30-39	0.0866303	1363.95	0.04386	0.143661	-7.1587	0.057213	0.205798
GTEX-S3XE-1326-SM-GW1W3	Prostate	50-59	0.133822	2004.31	0.0516775	0.199434	-1.6027	0.0597447	0.228865
GTEX-S4Q7-1026-SM-GW1YE	Prostate	20-29	0.0774558	1460.99	0.0413935	0.14533	-5.41872	0.0726459	0.227917
GTEX-S7PM-2426-SM-GW29V	Prostate	60-69	0.128578	1918.72	0.0521871	0.19294	-0.726004	0.0553008	0.218788
GTEX-S7SE-2426-SM-GW2BP	Prostate	50-59	0.096619	1601.3	0.0488886	0.157866	-4.3876	0.0851383	0.223484
GTEX-S95S-1026-SM-GW1A5	Prostate	60-69	0.109793	1627.23	0.0514125	0.198407	-4.01583	0.0523256	0.216717
GTEX-SIU8-2226-SM-GW1BI	Prostate	50-59	0.13232	1185.1	0.0386346	0.181735	1.91896	0.0546901	0.213639
GTEX-SJXC-2026-SM-GW19M	Prostate	60-69	0.212827	3409.68	0.0828207	0.266744	2.91035	0.0631589	0.208191
GTEX-SNMC-0926-SM-GW1EX	Prostate	20-29	0.109721	1587.62	0.0444776	0.171892	-0.304676	0.0637713	0.217663
GTEX-SNOS-1026-SM-GW22Q	Prostate	40-49	0.129015	1680.55	0.046943	0.174784	-4.56817	0.060243	0.211305
GTEX-SUCS-1126-SM-GW1SP	Prostate	70-79	0.0761611	758.686	0.0418227	0.130007	-10.6587	0.0483081	0.217997
GTEX-T8EM-1826-SM-GW2BH	Prostate	40-49	0.172209	2368.36	0.063214	0.239929	-1.77708	0.0580232	0.220962
GTEX-U3ZH-0926-SM-GW1TY	Prostate	30-39	0.227491	3384.96	0.0806412	0.205032	4.66698	0.0582038	0.263497
GTEX-U3ZM-0926-SM-GW1ZM	Prostate	40-49	0.0690522	1356.66	0.0389252	0.156822	-3.85041	0.0586062	0.226523
GTEX-U412-2026-SM-GW1AI	Prostate	60-69	0.118461	1840.05	0.0586291	0.167225	-6.20823	0.0550587	0.232259
GTEX-U8T8-2126-SM-GW2C6	Prostate	60-69	0.319501	2126.52	0.0626964	0.301562	-5.99572	0.0505099	0.172295
GTEX-UPK5-2526-SM-GW2C4	Prostate	40-49	0.0739918	1113.66	0.0360751	0.156167	-3.52171	0.061908	0.223638
GTEX-UTHO-2726-SM-GW1B3	Prostate	60-69	0.143889	2078.16	0.0582404	0.182996	-1.23855	0.0571877	0.226034
GTEX-WFG8-1826-SM-GW2B1	Prostate	20-29	0.0898251	1438.99	0.0444164	0.144679	-1.16686	0.0665873	0.244503
GTEX-WHSE-2826-SM-GW1CM	Prostate	20-29	0.0682073	1173.68	0.0370768	0.145924	-3.8545	0.0551452	0.215672
GTEX-WL46-2126-SM-GW1GC	Prostate	50-59	0.0829252	1411.02	0.0456833	0.154699	-3.42543	0.0576921	0.225065
GTEX-WOFL-2126-SM-GW1H4	Prostate	60-69	0.0918888	1236.9	0.0427734	0.166972	-3.96972	0.0548344	0.219458
GTEX-WQUQ-2726-SM-GW1YT	Prostate	60-69	0.177241	2729.92	0.0738226	0.205429	2.14725	0.0571238	0.221798
GTEX-WVLH-2826-SM-GW19C	Prostate	50-59	0.0832569	1402.29	0.0442155	0.154425	-3.10672	0.0690021	0.225631
GTEX-WY7C-2026-SM-GW1WF	Prostate	50-59	0.11187	1626.62	0.0475474	0.163618	-0.0127201	0.0520063	0.230492
GTEX-WYJK-0626-SM-GW1WD	Prostate	50-59	0.0979726	1554.64	0.0461023	0.177867	-1.29102	0.0554819	0.213388
GTEX-WZTO-0926-SM-GW1WB	Prostate	40-49	0.098372	1560.92	0.0460955	0.168902	-2.3816	0.0624457	0.218355
GTEX-X261-2226-SM-GW1F6	Prostate	50-59	0.604946	7594.58	0.194732	0.405236	20.9018	0.0668857	0.219376
GTEX-X3Y1-1026-SM-GW1UP	Prostate	40-49	0.0566112	827.743	0.0365024	0.112196	-10.1166	0.0465248	0.200817
GTEX-X4XY-2826-SM-GW1FB	Prostate	60-69	0.244468	4173.19	0.0961474	0.251259	10.1972	0.0644976	0.262912
GTEX-X585-2726-SM-GW19Q	Prostate	50-59	0.0873282	1473.14	0.0471175	0.158399	-1.00746	0.0717184	0.215963
GTEX-X62O-2726-SM-GW1EV	Prostate	50-59	0.0751791	1507.4	0.0449425	0.157869	-1.64522	0.0573484	0.224807
GTEX-XBED-1826-SM-GW1F8	Prostate	60-69	0.117216	1811.84	0.0513639	0.167744	0.0474229	0.062022	0.237738
GTEX-XBEW-2226-SM-GW2BG	Prostate	40-49	0.0779574	1238.53	0.0398965	0.1521	-2.09597	0.0632496	0.238276
GTEX-XGQ4-1826-SM-GW1BK	Prostate	50-59	0.133058	1761.85	0.0532597	0.191772	-2.75654	0.0557665	0.214389
GTEX-XMD1-2626-SM-GW2BD	Prostate	60-69	0.107766	1942	0.0529329	0.189393	-0.447477	0.0697514	0.23038
GTEX-XMK1-1026-SM-GW1G4	Prostate	40-49	0.0783151	1281.41	0.0421481	0.154156	-2.66331	0.0552025	0.229243
GTEX-XPT6-1526-SM-GW1W2	Prostate	20-29	0.0568751	516.168	0.0332244	0.122431	-10.5107	0.0476542	0.213228
GTEX-XPVG-2026-SM-GW2AQ	Prostate	50-59	0.0767095	1233.72	0.042125	0.159952	-5.57459	0.0484057	0.203323
GTEX-XQ3S-2526-SM-GW1CJ	Prostate	20-29	0.0638342	1157.68	0.0345458	0.137697	-2.28679	0.064422	0.227167
GTEX-Y111-2326-SM-GW1FN	Prostate	50-59	0.127412	1742.12	0.0482894	0.180597	-1.23981	0.0603998	0.227636
GTEX-YB5E-1826-SM-GW2AC	Prostate	40-49	0.0883351	1509.51	0.0449382	0.153469	-1.12717	0.0715355	0.245034
GTEX-YEC3-2226-SM-GW2B9	Prostate	50-59	0.174682	2146.13	0.0594129	0.251745	3.86115	0.0614852	0.222336
GTEX-YJ89-2726-SM-GW198	Prostate	60-69	0.0789971	1465.74	0.044807	0.150606	-4.51894	0.0599368	0.209144
GTEX-111FC-1926-SM-GW23G	Testis	60-69	0.0547442	-350.745	0.0252813	0.0511808	-13.1184	0.079534	0.123394
GTEX-1192W-2326-SM-GW2AU	Testis	60-69	0.0803027	93.6163	0.034667	0.104845	-12.5948	0.0601709	0.202211
GTEX-11NV4-1726-SM-GW1ZP	Testis	60-69	0.0502386	-318.801	0.0261834	0.0431043	-11.1371	0.0847919	0.120907
GTEX-11TT1-2226-SM-GW2BX	Testis	20-29	0.0456005	-533.43	0.0215282	0.0408735	-10.195	0.0791319	0.133367
GTEX-11UD2-2826-SM-GW23F	Testis	50-59	0.0414611	-543.939	0.0218856	0.0543136	-12.5357	0.073086	0.155983
GTEX-11ZUS-2726-SM-GW1TZ	Testis	30-39	0.0433179	-509.127	0.0225835	0.0408348	-12.1838	0.0780875	0.12602
GTEX-1212Z-0326-SM-GW2C5	Testis	60-69	0.0504946	-646.093	0.0197022	0.0310532	-15.5027	0.0799713	0.0930606
GTEX-12696-0226-SM-GW1XR	Testis	60-69	0.0483561	-493.47	0.0224938	0.0388042	-12.0781	0.0853426	0.129743
GTEX-12KS4-0226-SM-GW2AT	Testis	30-39	0.0479117	-477.603	0.0227022	0.0489296	-11.9951	0.0743582	0.155592
GTEX-12WSA-0126-SM-GW1YY	Testis	60-69	0.059405	-73.1759	0.0307049	0.0649144	-8.19218	0.0694613	0.171097
GTEX-12WSE-0126-SM-GW23K	Testis	20-29	0.0519075	-487.854	0.0233982	0.042206	-13.5877	0.0846876	0.130362
GTEX-12ZZW-0626-SM-GW1F1	Testis	50-59	0.0695419	-28.4607	0.0327873	0.0869494	-11.9793	0.0694988	0.162696
GTEX-12ZZY-0126-SM-GW1SQ	Testis	60-69	0.0610959	-231.349	0.0279904	0.0408687	-11.8938	0.0889744	0.112721
GTEX-13112-0226-SM-GW2AM	Testis	50-59	0.0463256	-476.879	0.0233538	0.0430987	-11.7271	0.0865651	0.126859
GTEX-1399R-1626-SM-GW1U7	Testis	30-39	0.0579616	-288.817	0.0280743	0.0852964	-11.3488	0.0606915	0.189588
GTEX-139YR-1426-SM-GW1XK	Testis	50-59	0.0457817	-567.805	0.020962	0.0535211	-11.4075	0.0711425	0.145352
GTEX-13FTW-1326-SM-GW1RU	Testis	40-49	0.051128	-293.533	0.027196	0.0536528	-10.1807	0.0867502	0.151819
GTEX-13NYS-1126-SM-GW1Y4	Testis	60-69	0.081173	232.6	0.0383347	0.0947244	-12.5199	0.0643945	0.192873
GTEX-13NZA-2526-SM-GW23E	Testis	60-69	0.0517622	-452.837	0.0235636	0.0460309	-12.2357	0.07428	0.121487
GTEX-13O3P-2526-SM-GW1V8	Testis	50-59	0.0459517	-600.943	0.0207127	0.0473313	-12.4754	0.0709142	0.140304
GTEX-13OW5-2526-SM-GW19A	Testis	60-69	0.0673833	-37.8658	0.0322943	0.0539005	-10.4552	0.0886858	0.132954
GTEX-13W46-0126-SM-GW1AN	Testis	50-59	0.0611675	-247.453	0.0277727	0.040071	-11.9589	0.0931163	0.111147
GTEX-147GR-0626-SM-GW1CU	Testis	60-69	0.0926308	265.887	0.0370129	0.0895398	-11.4956	0.0629943	0.167017
GTEX-148VJ-2526-SM-GW1VF	Testis	70-79	0.101705	250.659	0.0361713	0.108665	-12.9708	0.0532851	0.198366
GTEX-14C39-0526-SM-GW16B	Testis	40-49	0.0574296	-285.654	0.0272663	0.0469812	-12.3236	0.082688	0.111182
GTEX-14E6D-1226-SM-GW1CS	Testis	50-59	0.0649445	-92.814	0.031645	0.0600713	-12.4099	0.0775456	0.134645
GTEX-15CHQ-2726-SM-GW1VK	Testis	60-69	0.0737945	-139.809	0.0297405	0.0711602	-10.2727	0.0604084	0.180575
GTEX-15D1Q-2326-SM-GW21J	Testis	40-49	0.0592475	-293.815	0.0272284	0.0757262	-11.7147	0.0566669	0.186203
GTEX-15EU6-2326-SM-GW16L	Testis	50-59	0.0538181	-314.632	0.0270276	0.0413112	-9.91904	0.0906729	0.124182
GTEX-15G1A-1526-SM-GW21L	Testis	30-39	0.0535066	-391.311	0.0248128	0.0601453	-11.7942	0.0597607	0.16167
GTEX-18465-1526-SM-GW1GT	Testis	50-59	0.0584465	-330.264	0.0262271	0.0468515	-10.6607	0.0832989	0.13129
GTEX-1A3MV-0726-SM-GW1V4	Testis	30-39	0.0425008	-608.979	0.0203845	0.0340992	-12.2449	0.0848547	0.124719
GTEX-1B98T-0626-SM-GW21S	Testis	60-69	0.0388824	-695.013	0.018547	0.0325229	-15.4635	0.0749861	0.0891714
GTEX-1C64N-2826-SM-GW21K	Testis	50-59	0.0385211	-735.574	0.0173399	0.0300213	-15.853	0.0786389	0.0997106
GTEX-1CAMQ-2326-SM-GW21R	Testis	40-49	0.0499399	-450.286	0.0234636	0.0456198	-11.5683	0.0811716	0.142041
GTEX-1F5PK-1226-SM-GW1V3	Testis	50-59	0.0552656	-322.093	0.0267735	0.0745736	-11.6013	0.0623314	0.183089
GTEX-1F6IF-0526-SM-GW1C5	Testis	60-69	0.0528398	-379.363	0.0256168	0.0544968	-12.3277	0.08002	0.134242
GTEX-1GL5R-0826-SM-GW1H2	Testis	50-59	0.048457	-301.655	0.0258474	0.0524895	-12.0651	0.0658261	0.149392
GTEX-1GTWX-2226-SM-GW16F	Testis	60-69	0.0515843	-285.978	0.0271693	0.0431899	-12.04	0.0958085	0.114928
GTEX-1H1ZS-2826-SM-GW1VE	Testis	70-79	0.0612033	-129.126	0.0299979	0.0622982	-8.56351	0.0791389	0.166526
GTEX-S33H-0126-SM-GW1ZW	Testis	30-39	0.0468334	-522.501	0.022125	0.0413239	-12.3481	0.0800065	0.13899
GTEX-SIU8-2326-SM-GW1FW	Testis	50-59	0.0970713	181.672	0.0362177	0.09882	-10.607	0.0658552	0.208855
GTEX-SNOS-1126-SM-GW1TU	Testis	40-49	0.0545776	-437.303	0.0237344	0.0457519	-14.4557	0.0741392	0.112258
GTEX-T8EM-0126-SM-GW23L	Testis	40-49	0.0466685	-455.323	0.0239739	0.0438227	-11.9276	0.0851616	0.130686
GTEX-U3ZH-1526-SM-GW1YW	Testis	30-39	0.0512119	-483.308	0.0231952	0.0499744	-11.037	0.0814992	0.159802
GTEX-WOFL-0526-SM-GW221	Testis	60-69	0.0721536	-31.1473	0.0322828	0.087408	-13.242	0.0574788	0.186584
GTEX-X261-2326-SM-GW24K	Testis	50-59	0.0554154	-501.407	0.023178	0.0532805	-10.9831	0.0764661	0.14934
GTEX-X4XX-0726-SM-GW1CG	Testis	60-69	0.0689125	25.7924	0.0342448	0.0732772	-9.20221	0.0755526	0.179416
GTEX-X585-0126-SM-GW1EZ	Testis	50-59	0.088274	228.713	0.0385551	0.0922297	-10.7968	0.0633548	0.195321
GTEX-X62O-0326-SM-GW228	Testis	50-59	0.0544887	-354.379	0.0257685	0.0517956	-13.1893	0.0721409	0.133211
GTEX-117YW-0003-SM-GW185	Whole Blood	50-59	0.296707	5066.07	0.115979	0.221139	8.85863	0.0779646	0.236233
GTEX-11DYG-0004-SM-GW225	Whole Blood	60-69	0.135754	1287.18	0.0540784	0.102576	-7.62456	0.0590362	0.123525
GTEX-11EMC-0004-SM-GW1YF	Whole Blood	60-69	0.104707	956.378	0.048556	0.0867024	-5.21516	0.0625568	0.139331
GTEX-11TT1-0001-SM-GW21F	Whole Blood	20-29	0.0660439	251.463	0.0353616	0.0571478	-14.0561	0.0529918	0.102431
GTEX-11ZU8-0002-SM-GW18V	Whole Blood	60-69	0.0883978	85.9824	0.0321499	0.0632532	-10.7236	0.0499849	0.111047
GTEX-11ZUS-0003-SM-GW1V6	Whole Blood	30-39	0.210442	2542.31	0.074223	0.154454	2.48567	0.058092	0.201479
GTEX-12KS4-0003-SM-GW1BP	Whole Blood	30-39	0.119158	941.735	0.0486551	0.089418	-5.6745	0.0553904	0.139399
GTEX-12WSA-0001-SM-GW187	Whole Blood	60-69	0.0703255	24.61	0.0313989	0.0519543	-12.7558	0.0475992	0.0986724
GTEX-12WSE-0002-SM-GW19L	Whole Blood	20-29	0.0823686	458.838	0.0407696	0.0637406	-11.5338	0.0652501	0.106335
GTEX-12WSI-0004-SM-GW2CP	Whole Blood	50-59	0.147868	1333.02	0.0549679	0.11306	-2.50713	0.0534645	0.170285
GTEX-12ZZW-0003-SM-GW18R	Whole Blood	50-59	0.107299	492.992	0.0379125	0.0835987	-8.85228	0.0490486	0.124077
GTEX-12ZZY-0004-SM-GW19K	Whole Blood	60-69	0.166649	1466.56	0.058482	0.117706	-2.11359	0.0647234	0.163079
GTEX-139YR-0004-SM-GW1DM	Whole Blood	50-59	0.0917607	497.598	0.0406362	0.0728567	-8.93856	0.0523813	0.12679
GTEX-13NYS-0003-SM-GW1FJ	Whole Blood	60-69	0.093227	463.689	0.0395327	0.0759929	-12.4048	0.0525077	0.133163
GTEX-13NZA-0003-SM-GW1F3	Whole Blood	60-69	0.111695	808.597	0.0469921	0.0867036	-6.72458	0.0554118	0.141702
GTEX-13OW5-0003-SM-GW2B3	Whole Blood	60-69	0.0560235	-126.535	0.0290046	0.0522382	-12.8517	0.045467	0.0995647
GTEX-13QIC-0004-SM-GW2BL	Whole Blood	60-69	0.188369	2994.08	0.0774009	0.148428	-1.48692	0.0612896	0.173042
GTEX-13SLX-0003-SM-GW18M	Whole Blood	50-59	0.302694	4774.19	0.104698	0.220561	16.0986	0.0976763	0.277686
GTEX-14A6H-0003-SM-GW21E	Whole Blood	30-39	0.0687078	229.37	0.0352169	0.0575987	-9.86179	0.0519293	0.121813
GTEX-14C39-0004-SM-GW17K	Whole Blood	40-49	0.0933511	605.104	0.0429345	0.0709657	-8.78828	0.0559334	0.113872
GTEX-14E6D-0002-SM-GW17I	Whole Blood	50-59	0.076907	345.566	0.0379468	0.0661538	-10.4469	0.0540433	0.105478
GTEX-15CHQ-0002-SM-GW21D	Whole Blood	60-69	0.12219	1074.68	0.0495152	0.0959363	-9.26729	0.057124	0.146377
GTEX-15D1Q-0004-SM-GW17J	Whole Blood	40-49	0.0720775	310.222	0.0379244	0.066172	-8.1323	0.0540858	0.122972
GTEX-15DDE-0001-SM-GW17D	Whole Blood	50-59	0.133453	821.478	0.0473357	0.088628	-8.98046	0.049601	0.121854
GTEX-15EU6-0003-SM-GW17V	Whole Blood	50-59	0.0628351	245.587	0.0355857	0.0527886	-13.2843	0.053388	0.0990497
GTEX-15SHU-0001-SM-GW17T	Whole Blood	40-49	0.111216	658.413	0.0438386	0.0916293	-6.99184	0.0473123	0.138716
GTEX-1A3MV-0002-SM-GW17U	Whole Blood	30-39	0.0656986	40.2049	0.0320284	0.0497682	-9.83539	0.0556505	0.110748
GTEX-1B98T-0003-SM-GW1CR	Whole Blood	60-69	0.214205	3489.67	0.0960834	0.197472	13.6315	0.06489	0.227005
GTEX-1C64N-0003-SM-GW1CV	Whole Blood	50-59	0.217283	2670.84	0.0811339	0.186808	9.76628	0.0688081	0.229156
GTEX-1CAMQ-0003-SM-GW1ZX	Whole Blood	40-49	0.0564784	-173.796	0.0282966	0.0496592	-10.628	0.0478596	0.112061
GTEX-1GMR3-0001-SM-GW1BQ	Whole Blood	40-49	0.106001	875.255	0.0473366	0.085802	-6.65073	0.0513756	0.14417
GTEX-1GTWX-0001-SM-GW1GR	Whole Blood	60-69	0.159683	2262.01	0.0690938	0.13804	-4.18189	0.0555672	0.15025
GTEX-1H1ZS-0002-SM-GW1AK	Whole Blood	70-79	0.221182	3237.09	0.0867536	0.191177	2.44108	0.0645032	0.187492
GTEX-1H3VE-0001-SM-GW18P	Whole Blood	40-49	0.0570234	-149.511	0.028752	0.0438404	-11.8436	0.0557444	0.106847
GTEX-1I6K6-0004-SM-GW1DL	Whole Blood	30-39	0.0720122	327.494	0.0374917	0.0690131	-11.3317	0.0498869	0.110946
GTEX-1J1R8-0004-SM-GW22Y	Whole Blood	40-49	0.0655981	-121.584	0.0292284	0.0434333	-8.34692	0.0498064	0.115859
GTEX-SNOS-0004-SM-GW1FF	Whole Blood	40-49	0.0740792	437.777	0.0393692	0.0623362	-12.3643	0.0457152	0.105628
GTEX-U3ZH-0003-SM-GW1FM	Whole Blood	30-39	0.0876711	418.022	0.0395087	0.0690042	-8.46166	0.0481745	0.126389
GTEX-U3ZM-0004-SM-GW1C4	Whole Blood	40-49	0.0835743	430.788	0.0401192	0.0608402	-11.127	0.0523376	0.113014
GTEX-U8XE-0004-SM-GW1FI	Whole Blood	30-39	0.154589	1393.56	0.0558759	0.114174	-0.671923	0.0558835	0.176633
GTEX-WFG8-0004-SM-GW21G	Whole Blood	20-29	0.056967	-108.539	0.030319	0.0413199	-11.3008	0.0471548	0.110806
GTEX-WH7G-0004-SM-GW17G	Whole Blood	40-49	0.0597788	-44.2035	0.0304209	0.0469802	-13.1179	0.0543634	0.10039
GTEX-WRHU-0003-SM-GW18B	Whole Blood	50-59	0.24764	3321.35	0.0879305	0.177796	7.86041	0.0709965	0.233967
GTEX-WWYW-0004-SM-GW17Q	Whole Blood	50-59	0.118181	857.163	0.0465708	0.0957432	-9.14999	0.0555796	0.123142
GTEX-X261-0002-SM-GW17B	Whole Blood	50-59	0.0921162	423.212	0.0392028	0.0690627	-6.60553	0.0508689	0.140028
GTEX-X4EP-0002-SM-GW17R	Whole Blood	60-69	0.094773	433.589	0.0392452	0.0719218	-0.733467	0.0601131	0.149714
GTEX-X4XX-0004-SM-GW17N	Whole Blood	60-69	0.262559	4480.47	0.108173	0.188866	1.60213	0.061939	0.190529
GTEX-X585-0003-SM-GW17P	Whole Blood	50-59	0.152466	1354.22	0.0540961	0.121505	-3.38102	0.0541918	0.177798
GTEX-X5EB-0001-SM-GW17Y	Whole Blood	40-49	0.0598253	69.0043	0.0323295	0.0521468	-17.4316	0.044135	0.0851188
GTEX-XMK1-0003-SM-GW2B7	Whole Blood	40-49	0.0795128	258.795	0.0355057	0.0641663	-8.8143	0.0434801	0.124531
GTEX-XPT6-0004-SM-GW1DN	Whole Blood	20-29	0.0536332	-257.36	0.026704	0.0400716	-12.1451	0.0442446	0.116388
GTEX-YFC4-0001-SM-GW1YL	Whole Blood	40-49	0.0984119	431.602	0.0394791	0.069285	-11.7618	0.0457144	0.108493
GTEX-YFCO-0001-SM-GW29R	Whole Blood	40-49	0.073297	126.783	0.0340117	0.0533773	-14.4355	0.0532764	0.0916175
GTEX-ZAB4-0001-SM-GW24D	Whole Blood	40-49	0.102513	345.112	0.038028	0.0709677	-8.9877	0.0617672	0.129128

## Sheet: SuppData4
Supplementary Data 4: Sample ID, cell-type and study, age and mitotic age estimate of 7 mitotic clocks for all sorted immune cells.
SampleID	CellType	Age	stemTOC	epiTOC2	epiTOC1	EpiCMIT_hyper	RepliTali	HypoClock	EpiCMIT_hypo
S00JT7	MO_BP	72	0.10262	549.434	0.0422773	0.0617873	86.9477	0.0656137	0.112882
S00Q4T	MO_BP	55	0.0978859	382.666	0.0411255	0.0609885	87.0299	0.0702889	0.100787
S00P20	MO_BP	62	0.0985235	571.657	0.0436039	0.0652692	87.4115	0.077634	0.105194
S00PED	MO_BP	64	0.102848	377.737	0.0401365	0.063115	87.0978	0.0642005	0.0980857
S00PVG	MO_BP	64	0.0942876	255.73	0.0378384	0.0553869	86.4408	0.0701353	0.0976312
S00R1V	MO_BP	57	0.090599	206.991	0.0372285	0.0532802	86.7743	0.0647276	0.0947177
S00NXK	MO_BP	62	0.109656	323.543	0.0378274	0.0502259	86.0693	0.0673935	0.0997655
S00PQQ	MO_BP	55	0.0952253	272.943	0.0376898	0.0577937	86.1049	0.0620826	0.0946047
S00SV4	MO_BP	57	0.0955063	378.681	0.0390382	0.0577409	86.3972	0.0713791	0.106108
S00PCH	MO_BP	63	0.104438	386.325	0.04035	0.0595764	86.1004	0.0703229	0.0993091
S00M1E	MO_BP	52	0.107312	395.126	0.0400093	0.0595918	86.6957	0.0635334	0.0932698
S00P6T	MO_BP	62	0.10363	427.199	0.0401503	0.0606456	85.9356	0.0594604	0.101355
S00V65	MO_BP	66	0.0948635	374.795	0.0398813	0.0605651	85.7757	0.0654848	0.100897
S00RBB	MO_BP	63	0.101128	265.21	0.038463	0.0588031	87.5229	0.0689358	0.0988335
S00PYA	MO_BP	66	0.103684	481.766	0.0421133	0.0683183	86.4629	0.0660925	0.0909367
S00Q6P	MO_BP	68	0.0958166	415.686	0.040248	0.061361	86.9487	0.064849	0.0987965
S00W45	MO_BP	67	0.0885301	319.072	0.037169	0.0558716	87.2122	0.0591887	0.100863
S00Q5R	MO_BP	71	0.0998981	280.64	0.0374312	0.0583519	86.9308	0.0594355	0.106461
S00MBV	MO_BP	51	0.0934828	187.897	0.0366675	0.0581151	86.0106	0.0587873	0.0988059
S00SMM	MO_BP	75	0.0974324	395.315	0.0388492	0.0558246	87.494	0.0549084	0.103522
S00KHR	MO_BP	69	0.0988814	357.096	0.0393987	0.0572841	87.0921	0.0701326	0.0953414
S00WRX	MO_BP	54	0.0991883	388.524	0.0406453	0.0592937	87.0039	0.0623245	0.0973132
S00QE9	MO_BP	39	0.0863644	293.878	0.0388812	0.0555859	86.3882	0.0633831	0.0962508
S00PBJ	MO_BP	45	0.0903234	240.439	0.0376549	0.0555147	86.2428	0.0577785	0.0976578
S00W29	MO_BP	54	0.0972632	317.481	0.0387681	0.0595776	85.5557	0.0540368	0.090637
S00M80	MO_BP	74	0.113372	720.091	0.0462906	0.0713496	86.0026	0.0582837	0.105192
S00SYZ	MO_BP	74	0.101197	247.646	0.0377023	0.0587358	86.8019	0.0749566	0.100075
S00UME	MO_BP	50	0.103683	480.219	0.0417501	0.0626318	87.0662	0.0668272	0.111544
S00U1J	MO_BP	60	0.110751	394.879	0.0397406	0.0583808	85.6364	0.057188	0.0916663
S00UKI	MO_BP	55	0.0962948	328.863	0.0391985	0.0545305	86.7234	0.0731329	0.104596
S00PWE	MO_BP	50	0.100298	442.109	0.0412168	0.0617868	86.6133	0.0617374	0.109505
S00S2P	MO_BP	63	0.100524	341.549	0.0397842	0.0602618	86.6413	0.0793366	0.102028
S00RD7	MO_BP	58	0.099863	512.009	0.0423634	0.0621731	86.2774	0.0664321	0.0972806
S00SPG	MO_BP	54	0.0830128	99.0544	0.0342818	0.0521913	86.8179	0.0633072	0.112891
S00HE8	MO_BP	53	0.0885049	280.553	0.0387111	0.0555464	86.4185	0.0760256	0.105299
S00P04	MO_BP	33	0.0824341	219.89	0.0371379	0.049978	87.184	0.0592119	0.104532
S00D9Y	MO_BP	69	0.114747	515.851	0.0423781	0.0663572	87.9233	0.063887	0.10408
S00QQM	MO_BP	66	0.0990547	478.785	0.0417167	0.0667575	86.1592	0.0624725	0.108913
S00KKL	MO_BP	73	0.104979	435.565	0.0405024	0.0598701	85.6908	0.0690161	0.108973
S00FPV	MO_BP	70	0.115261	463	0.0415291	0.0683093	86.3993	0.0618928	0.102254
S00N36	MO_BP	57	0.080659	237.656	0.0354651	0.0493136	86.518	0.0603914	0.0989477
S00JU5	MO_BP	54	0.087432	278.04	0.0376591	0.0536635	86.5765	0.0720429	0.104968
S00Q00	MO_BP	75	0.111193	326.568	0.0387879	0.0562936	87.0618	0.0925376	0.102666
S00K0O	MO_BP	49	0.083315	60.5966	0.0343517	0.0464217	86.6817	0.0764952	0.100598
S00JD2	MO_BP	46	0.0818351	132.584	0.0347243	0.0487757	85.2019	0.070358	0.0939984
S00FK4	MO_BP	56	0.0824278	217.413	0.036514	0.0522728	86.1625	0.067477	0.102755
S000GZ	MO_BP	54	0.0992329	367.634	0.039603	0.0603048	86.8816	0.0670715	0.0992246
S00R0X	MO_BP	63	0.0952543	216.054	0.0363215	0.0599473	85.2184	0.0544903	0.114118
S00DQ0	MO_BP	51	0.10376	251.615	0.0373602	0.0551644	85.8396	0.0556683	0.0976981
S00FUL	MO_BP	35	0.10752	410.41	0.0408393	0.059055	86.1174	0.0651336	0.0895282
S00KEX	MO_BP	57	0.0981103	361.365	0.0379956	0.0567965	86.0327	0.0550324	0.09364
S00JYY	MO_BP	70	0.119046	522.313	0.0428301	0.0670699	86.101	0.0620468	0.108634
S00J9A	MO_BP	29	0.100484	396.014	0.0407538	0.0560188	87.1641	0.0577216	0.110905
S00GEC	MO_BP	61	0.122126	720.813	0.046209	0.0721817	86.9926	0.0573363	0.100473
S00PK1	MO_BP	59	0.104209	664.152	0.044208	0.0674188	86.1211	0.0549851	0.104901
S00SE1	MO_BP	61	0.100089	463.653	0.0418187	0.066322	85.9796	0.0561013	0.0970285
S00E9U	MO_BP	56	0.113028	656.661	0.0432408	0.0682053	86.6985	0.0599139	0.112349
S00RC9	MO_BP	35	0.0857266	173.081	0.0367137	0.0526819	86.1933	0.0561194	0.102151
S00HVB	MO_BP	67	0.0923581	197.65	0.0357992	0.0579419	85.5988	0.050101	0.090309
S00RAD	MO_BP	62	0.107079	418.97	0.0413531	0.0678009	86.8432	0.0606377	0.0980216
S00G5U	MO_BP	56	0.0942457	323.478	0.0395934	0.0584042	85.7348	0.0821338	0.101242
S00P4X	MO_BP	66	0.104693	578.074	0.0429264	0.0652598	86.2561	0.054211	0.100173
S00QPO	MO_BP	65	0.10738	515.434	0.0428485	0.064473	86.8477	0.0639828	0.100619
S00QWA	MO_BP	69	0.111386	637.331	0.0445662	0.0698775	85.542	0.0638767	0.0945229
S010MF	MO_BP	66	0.0904135	219.993	0.0372716	0.0557668	86.2283	0.0687107	0.096804
S00WKA	MO_BP	69	0.102754	444.534	0.0406372	0.0743258	85.5793	0.0518783	0.109292
S00P8P	MO_BP	68	0.104921	537.467	0.042515	0.0669946	87.2154	0.0607461	0.103784
S00RMQ	MO_BP	68	0.109742	597.033	0.0432516	0.0632932	85.9323	0.0591287	0.0975923
S00M2C	MO_BP	58	0.103091	374.237	0.0398817	0.0627222	85.3917	0.0535156	0.0896877
S00S4L	MO_BP	48	0.086946	196.003	0.0363232	0.0538185	86.651	0.0589004	0.0970689
S00M48	MO_BP	75	0.0952733	284.058	0.0381498	0.0660328	85.5025	0.0543853	0.090514
S00V57	MO_BP	65	0.089255	69.108	0.0344149	0.0532713	88.3431	0.0946044	0.106423
S00KFV	MO_BP	63	0.0947566	56.2433	0.0340144	0.050402	87.311	0.0942261	0.104898
S00S7F	MO_BP	64	0.0919661	177.128	0.0369649	0.0545504	85.639	0.0891153	0.101471
S00NHF	MO_BP	33	0.0822113	18.6619	0.0334335	0.0422514	86.593	0.0893063	0.104203
S00QTG	MO_BP	49	0.0862314	162.871	0.036542	0.0494269	86.3025	0.0990851	0.104104
S00GBI	MO_BP	41	0.0811037	50.3225	0.0334568	0.0455299	86.6749	0.078379	0.0993592
S00J3M	MO_BP	49	0.0993559	121.332	0.034374	0.0497754	86.158	0.0627199	0.106589
S00SHW	MO_BP	64	0.1012	156.46	0.0376445	0.0523561	86.2572	0.109431	0.104995
S00VGM	MO_BP	68	0.100568	297.811	0.0389489	0.0562967	86.8011	0.0973268	0.110576
S00TA5	MO_BP	68	0.106056	775.386	0.0469782	0.0578978	86.7039	0.0787414	0.0953986
S00G9M	MO_BP	41	0.0918359	261.46	0.0374488	0.0577758	87.8568	0.0634337	0.12012
S00PDF	MO_BP	30	0.0904526	140.654	0.035781	0.0482464	86.9331	0.0763471	0.095558
S00FVJ	MO_BP	48	0.10328	314.162	0.0389384	0.0574283	85.9518	0.076369	0.0939116
S00H5Q	MO_BP	65	0.0907774	189.387	0.0354312	0.0536167	86.6586	0.0815338	0.108894
S00QRK	MO_BP	65	0.0853682	367.897	0.0391293	0.0615388	86.2377	0.0732789	0.106464
S00N52	MO_BP	56	0.0860229	180.33	0.035652	0.0553058	86.2897	0.0760266	0.110152
S00WQZ	MO_BP	60	0.0941478	207.223	0.0375537	0.0541026	87.8022	0.098263	0.103597
S007WC	MO_BP	64	0.104821	250.135	0.037804	0.0562668	87.2092	0.0644779	0.107845
S00GWD	MO_BP	36	0.0868454	150.314	0.0356646	0.0470657	87.684	0.079849	0.111288
S00WP0	MO_BP	67	0.103821	504.073	0.0419482	0.065148	86.7677	0.0861002	0.102113
S00N7Z	MO_BP	61	0.0999154	102.574	0.0357567	0.0519658	84.3652	0.0820886	0.0991552
S00T6D	MO_BP	64	0.108387	261.288	0.0399789	0.0559754	86.2388	0.100093	0.101578
S00DP2	MO_BP	66	0.102925	341.683	0.0395193	0.0602942	86.6149	0.0836676	0.0974984
S00K4G	MO_BP	41	0.0757132	91.0953	0.0335506	0.0466223	87.2582	0.0744125	0.109341
S00G7Q	MO_BP	59	0.084498	43.1424	0.0343826	0.0537752	88.3915	0.0884586	0.116138
S00NUQ	MO_BP	64	0.0917305	107.39	0.0349585	0.0499229	88.0649	0.0812476	0.113648
S00DKC	MO_BP	64	0.092482	302.108	0.0392749	0.0575384	87.0899	0.0837604	0.108002
S00U93	MO_BP	49	0.0846247	276.511	0.0386624	0.0489535	86.5363	0.0839661	0.107267
S00T4H	MO_BP	66	0.0947284	188.408	0.036782	0.0558419	86.5256	0.0935932	0.110078
S00JV3	MO_BP	23	0.0778683	-15.1021	0.0327929	0.0404362	87.2997	0.0897858	0.100963
S00NVO	MO_BP	66	0.0907054	227.128	0.0369486	0.0539076	87.3261	0.0765543	0.113989
S0100M	MO_BP	69	0.108757	519.75	0.0448003	0.0628526	87.7127	0.0932719	0.109954
S00QY6	MO_BP	49	0.0980165	256.895	0.038389	0.0571249	86.7621	0.100558	0.105742
S00GSL	MO_BP	34	0.0960316	157.275	0.0368276	0.0502313	86.4314	0.11237	0.107316
S00NQY	MO_BP	57	0.103681	522.555	0.042058	0.063921	85.7966	0.0718004	0.0985206
S00U5B	MO_BP	58	0.101076	292.134	0.0407043	0.0536953	86.1497	0.0903598	0.0985292
S007PQ	MO_BP	64	0.104528	355.334	0.0391778	0.0604472	87.2303	0.0896138	0.101486
S0012M	MO_BP	38	0.10293	245.159	0.0372379	0.0509409	85.8443	0.08281	0.10421
S003R1	MO_BP	50	0.0983718	271.846	0.0380617	0.0549999	86.8641	0.0667254	0.0946249
S002WW	MO_BP	49	0.0854657	118.87	0.0342683	0.0560708	86.0217	0.0550097	0.0997594
S002XU	MO_BP	49	0.0917683	268.455	0.0373649	0.0600984	85.7796	0.0582195	0.101046
S007CF	MO_BP	62	0.0877915	167.416	0.0353048	0.0507962	87.6546	0.0733719	0.0998479
S007DD	MO_BP	52	0.0891483	191.65	0.0362499	0.0517413	85.4413	0.081145	0.10112
S0010Q	MO_BP	61	0.0953143	275.303	0.0374408	0.0573064	85.8905	0.0699427	0.100454
S0032E	MO_BP	65	0.114336	888.992	0.0476265	0.0789435	86.5078	0.0525758	0.109498
S003AZ	MO_BP	67	0.130736	771.264	0.0478679	0.0752674	86.9331	0.0868262	0.106031
S002FT	MO_BP	60	0.0937986	270.302	0.0372778	0.0565721	86.3432	0.0575351	0.0970426
S004N5	MO_BP	60	0.121341	360.015	0.0423334	0.0518549	87.4032	0.129685	0.125935
S0064Z	MO_BP	55	0.0926552	325.323	0.0389904	0.0601359	85.5348	0.0726034	0.0994767
S004M7	MO_BP	64	0.102244	480.06	0.0417192	0.0665183	85.4855	0.0730064	0.0999814
S00630	MO_BP	42	0.086809	168.447	0.0360223	0.0540908	87.4498	0.0644266	0.100426
S000X1	MO_BP	51	0.080727	240.463	0.0371923	0.0535543	86.2372	0.0672148	0.103338
S005WK	MO_BP	66	0.10223	374.009	0.0394849	0.0617453	86.9018	0.0690309	0.0946586
S007VE	MO_BP	33	0.102435	296.682	0.0386508	0.0533489	85.876	0.0717442	0.0926919
S003JH	MO_BP	66	0.100683	411.141	0.0401769	0.0602578	86.8869	0.0712446	0.0962214
S0041C	MO_BP	63	0.104451	445.152	0.0419768	0.0564784	87.1932	0.0898541	0.11063
S005N1	MO_BP	55	0.103232	388.146	0.0423703	0.0586778	86.1643	0.0923709	0.104374
S007F9	MO_BP	65	0.105984	545.506	0.0446848	0.0608634	87.0869	0.097825	0.108632
S005VM	MO_BP	58	0.0936483	221.123	0.0372029	0.0567776	87.2009	0.0919144	0.104627
S002MF	MO_BP	67	0.109365	576.059	0.0432382	0.0736843	86.852	0.0573248	0.115508
S006XE	MO_BP	66	0.128951	550.083	0.0450526	0.0642983	86.284	0.137711	0.13777
S003Q3	MO_BP	55	0.0946474	309.442	0.0398273	0.0552299	86.5762	0.0971836	0.110173
S00382	MO_BP	62	0.0918806	198.798	0.0362016	0.0542523	86.351	0.0591265	0.106457
S001GV	MO_BP	65	0.111141	562.893	0.0435782	0.0734914	86.9088	0.0727057	0.106343
S007G7	MO_BP	64	0.0970576	278.563	0.0375613	0.0553931	86.7621	0.0777687	0.100272
S001C2	MO_BP	66	0.0983068	575.323	0.0426644	0.0676851	90.0648	0.0548517	0.109549
S002EV	MO_BP	48	0.0867964	242.241	0.0371621	0.0568794	86.0061	0.0576058	0.10712
S0031G	MO_BP	63	0.102755	364.471	0.0393675	0.0610492	86.2527	0.0633403	0.0991123
S00WKA	NEU_BP	69	0.0882825	23.7468	0.033398	0.0524434	86.1066	0.0979648	0.106484
S00PDF	NEU_BP	30	0.0931385	95.8041	0.0342756	0.0459201	86.6917	0.0641647	0.108891
S00W29	NEU_BP	54	0.095095	109.43	0.0353897	0.0515694	86.2317	0.0852995	0.103105
S00JYY	NEU_BP	70	0.0973888	126.797	0.0337797	0.0464877	85.7611	0.0577552	0.0972809
S00P20	NEU_BP	62	0.101451	127.2	0.0364366	0.0511373	86.6721	0.0899819	0.100118
S00GSL	NEU_BP	34	0.0865593	21.2127	0.0338282	0.040916	86.1803	0.0776937	0.0913004
S00QRK	NEU_BP	65	0.102867	215.207	0.0381074	0.0520503	85.4795	0.0840642	0.100802
[truncated: 2,089 more rows]

## Sheet: SuppData5
Supplementary Data 5: SampleID, EpiSCORE cell-type fraction estimates for TCGA-BLCA samples. EC=endothelial cell, Epi=epithelial cell, Fib=fibroblast, IC=immune-cell.
[truncated: 435 more rows]

[truncated: 16 more sheets: SuppData6, SuppData7, SuppData8, SuppData9, SuppData10, SuppData11, SuppData12, SuppData13, SuppData14, SuppData15, SuppData16, SuppData17, SuppData18, SuppData19, SuppData20, SuppData21]
