# Supplementary material for: An improved epigenetic counter to track mitotic age in normal and precancerous tissues
Source: Nat Commun. 2024 May 17;15:4211. doi: 10.1038/s41467-024-48649-8 (PMC11101651; doi:10.1038/s41467-024-48649-8)
Supplement: Supplementary file 6 — Source Data [file 41467_2024_48649_MOESM6_ESM.xlsx]

## Sheet: Fig.1b
Hannum	Age	cg20327258	cg23062112	cg07365816	cg08659394	cg14575559	cg13294856	cg18560328	cg21229268	cg20078466	cg23091824	cg03865257	cg16443455	cg11250773	cg10687823	cg12892303	cg12781700	cg13583934	cg12065366	cg25203031	cg17404915	cg22299454	cg10698404	cg09097345	cg05404701	cg24010885	cg17712694	cg20707222	cg08901752	cg11297107	cg17876581	cg02450646	cg12799781	cg01718742	cg10263370	cg15774465	cg16491617	cg11832210	cg23156475	cg07686635	cg16944092	cg08285388	cg26510017	cg15745900	cg15402399	cg00039793	cg06963053	cg05009934	cg14213543
GSM989863	101	0.00710708	0.0491906	0.00576636	0.00483959	0.013873	0.0250023	0.0151087	0.037698	0.0108389	0.00351091	0.017552	0.0127001	0.143885	0.0183177	0.141999	0.0471708	0.0340965	0.0298691	0.0189372	0.00105322	0.0492629	0.0159887	0.00628786	0.0194313	0.0190911	0.0494713	0.033735	0.0178164	0.00990025	0.0168847	0.0255646	0.0312142	0.0856018	0.127921	0.0217492	0.0798184	0.00836155	0.00152363	0.0257945	0.0534917	0.0805104	0.14896	0.0270589	0.0175836	0.00940909	0.0154212	0.0649218	0.0491855
GSM989882	96	0.00646191	0.23878	0.0118194	0.0668473	0.0282652	0.0297227	0.184438	0.161739	0.00253387	0.0151963	0.0345469	0.00175415	0.224119	0.0133257	0.167223	0.247894	0.0365177	0.228331	0.102516	0.0257184	0.0684998	0.00940223	0.143731	0.0467401	0.0137758	0.266105	0.125461	0.0158822	0.041626	0.0122615	0.0229127	0.128864	0.30672	0.272684	0.0469999	0.180246	0.082385	3.52322e-05	0.186251	0.0405329	0.080987	0.219933	0.23656	0.141217	0.00692876	0.0196345	0.175894	0.0430643
GSM989849	93	0.00769373	0.196069	0.0136789	0.0131545	0.0229839	0.0288671	0.125009	0.158144	0.00854101	0.00610771	0.0407684	0.00251815	0.207807	0.0139828	0.186084	0.110714	0.0353847	0.18787	0.0819392	0.0192273	0.101166	0.0198536	0.00094587	0.02123	0.00501248	0.171744	0.0931444	0.0157992	0.0359636	0.0271276	0.0231631	0.0787991	0.258949	0.183416	0.0397077	0.112058	0.0339974	3.39089e-05	0.0584833	0.0581842	0.0876075	0.165818	0.136057	0.086708	3.39089e-05	0.0191065	0.120735	0.0404324
GSM990581	93	0.00650963	0.0742877	0.00157576	0.0109134	0.0134747	0.0344796	0.0230191	0.07329	0.00993358	0.00102215	0.0535431	3.56464e-05	0.213379	0.024981	0.295122	0.0407136	0.0292146	0.0610455	0.0235811	0.00793106	0.0468874	3.56464e-05	0.00108314	0.0145317	3.56464e-05	0.133103	0.0350515	3.56464e-05	0.0177578	0.0421223	0.0142077	0.0677592	0.137423	0.138067	3.56464e-05	0.0275731	0.0432182	0.00825855	0.0323802	0.0443413	0.076723	0.139801	0.0563737	0.0242813	0.0112704	0.0093708	0.0589415	0.0339047
GSM989845	92	0.00771745	0.140057	0.0114967	0.0118217	0.0164532	0.0228669	0.0428715	0.0802857	0.00141561	0.0158815	0.0370487	0.00722455	0.115668	0.0164728	0.224996	0.0828888	0.045058	0.107892	0.0241219	0.00604456	0.0631515	0.0167072	0.0149168	0.029283	0.0150677	0.0922341	0.0538746	0.018391	0.027335	0.0234115	0.0158272	0.0555328	0.159573	0.234542	0.0203512	0.0815379	0.0247049	0.00883842	0.0265849	0.0515888	0.0792521	0.184924	0.055333	0.0449134	0.00468823	0.0206103	0.0949637	0.0378226
GSM990033	92	0.012531	0.153865	0.023965	0.00455522	0.00873064	0.0195367	0.255973	0.185512	0.00249404	0.0372201	0.305188	0.0133465	0.118275	0.0198316	0.256634	0.115506	0.0343459	0.237041	0.027098	0.015021	0.102653	0.0068126	0.082613	0.0234734	0.0010717	0.153341	0.160776	0.0112876	0.031959	0.0287289	0.0141641	0.0177009	0.225804	0.278592	0.00468869	0.144529	0.0851308	0.00102793	0.0333485	0.0380855	0.0831603	0.214549	0.0503957	0.0398934	0.000238247	0.0177809	0.101592	0.0211917
GSM990434	92	0.0120063	0.132043	0.0112923	0.0038357	0.0104809	0.00889919	0.133587	0.0756299	0.00155409	0.0047153	0.166009	0.00330805	0.196305	0.0176172	0.102512	0.0922322	0.00214286	0.206044	0.0478566	0.0333871	0.0506286	0.00254223	2.87841e-05	0.00397112	0.00639742	0.209951	0.0311908	0.016381	0.0208797	0.0244004	0.00699633	0.0460755	0.180927	0.176892	0.011525	0.0907404	0.0591724	2.87841e-05	0.0166021	0.0485621	0.0705884	0.209181	0.139425	0.0405348	2.87841e-05	0.0126954	0.0623243	2.87841e-05
GSM990588	92	0.00620617	0.129511	0.00453581	0.0364926	0.0213561	0.0197974	0.0181841	0.103514	0.0162386	0.0299357	0.0333935	0.00105422	0.154091	0.0189281	0.162947	0.0655701	0.0272638	0.158693	0.0372646	0.0198226	0.076006	0.00364214	0.00640397	0.012188	0.00871098	0.116014	0.0451884	0.0126564	0.0303865	0.00830242	0.0207227	0.0260383	0.158003	0.106305	3.68782e-05	0.0825427	0.0135719	0.00114456	0.0346682	0.0494554	0.0821158	0.127259	0.0533937	0.0310829	0.00748632	0.013091	0.106137	0.0114887
GSM990620	92	0.0108826	0.0540737	0.00405683	0.0110467	0.0232873	0.0330754	0.00141927	0.0269813	0.00472032	0.00530274	0.0223971	0.00758015	0.150785	0.0224507	0.174185	0.0579027	0.0434869	0.0459633	0.0341919	0.0176408	0.0379178	2.80656e-05	0.00458991	0.0061861	0.0164379	0.0629139	0.03669	0.0186191	0.0113743	0.0210281	0.0114474	0.0145705	0.102428	0.105482	2.80656e-05	0.048618	0.00896092	0.00287383	0.0382888	0.044006	0.0820365	0.12209	0.023947	0.0152124	2.80656e-05	0.0128449	0.0630675	0.0152529
GSM990558	91	0.0150381	0.137735	0.00883702	0.00568914	0.0180962	0.0362192	0.0888603	0.0543071	0.00438733	0.011604	0.0252997	0.00254307	0.145103	0.0196871	0.223557	0.0724258	0.0318759	0.229076	0.0392992	3.90192e-05	0.0509814	0.000950549	0.00368492	0.0211407	0.00989599	0.176329	0.0501629	0.0121112	0.0241105	0.0149069	0.012221	0.047154	0.137758	0.136781	0.0215243	0.0851853	0.0460312	0.00449981	0.0389507	0.0249774	0.0946252	0.155068	0.138584	0.0223859	0.00862648	0.00674513	0.0973672	0.0173097
GSM990427	90	0.00788772	0.157067	0.0446047	0.0399958	0.0134663	0.0332059	0.106268	0.160857	0.0206667	0.0129225	0.0332074	0.000372475	0.15544	0.0132168	0.166837	0.0649313	0.0449103	0.154292	0.0455316	0.00170649	0.0520614	0.00350043	0.0185136	0.0223355	0.00462448	0.158684	0.0833888	0.0185431	0.0471659	0.0152903	0.0148673	0.0758449	0.253769	0.246901	0.031396	0.131316	0.0277893	4.31994e-05	0.039946	0.0269105	0.0695878	0.208262	0.104306	0.0451541	4.31994e-05	0.0137025	0.13659	0.00962721
GSM990562	90	0.00209922	0.177066	0.00535665	0.0197859	0.00981868	0.0251207	0.0985381	0.107891	0.00455905	0.0342507	0.0183432	2.96838e-05	0.196656	0.0187887	0.178974	0.0940862	0.0193812	0.216956	0.0503248	0.0130534	0.0723112	0.00372688	0.00091486	0.0157399	0.0088677	0.135212	0.0617429	0.00923787	0.0129943	0.0107704	0.0149529	0.0501823	0.187967	0.165518	0.004438	0.100333	0.030731	2.96838e-05	0.0272087	0.0687969	0.0757005	0.166005	0.121593	0.0716602	2.96838e-05	0.0131872	0.110266	0.0157877
GSM990595	90	0.00877783	0.235137	0.00293738	0.00797783	0.0310691	0.039836	0.298084	0.315534	5.17116e-05	0.0271752	0.0563331	0.0312153	0.327681	0.0162635	0.167169	0.165887	0.0535088	0.432549	0.206161	0.0454398	0.149396	0.0319492	0.0116858	0.0187022	0.0216062	0.36137	0.0753627	0.00170134	0.0232753	0.00177275	0.0169144	0.18392	0.478304	0.493042	0.0287804	0.301644	0.0641213	0.0118088	0.21888	0.0225238	0.0592739	0.255919	0.137963	0.173832	0.00635302	5.17116e-05	0.17654	0.0605397
GSM989828	89	0.0103854	0.0865822	0.0088604	0.00655951	0.0205242	0.0176023	0.00791862	0.0489542	0.0110604	0.00971584	0.0397757	0.0049818	0.1136	0.0234433	0.0685492	0.0930402	0.0419079	0.0438785	0.0226056	0.00737579	0.0296302	0.0114005	0.00975515	0.0175985	0.0105152	0.0741792	0.0274703	0.0269623	0.0146158	0.0497995	0.0283534	0.0147745	0.086062	0.0743512	0.00211907	0.046286	0.0173553	0.00551241	0.0223892	0.0744427	0.0787018	0.146066	0.0384234	0.0245636	0.00809938	0.0158445	0.0834137	0.044684
GSM989890	89	3.22004e-05	0.0464884	0.0038739	3.22004e-05	0.0138581	0.021579	0.011675	0.0194954	0.0102171	3.22004e-05	0.0185718	3.22004e-05	0.13683	0.0127439	0.182791	0.0522459	0.0176096	0.0351394	0.0229053	0.0158826	0.0569385	0.0101676	0.00145088	0.00505151	0.0146049	0.174715	0.0267698	0.00687807	0.00957585	0.0173806	0.00867895	0.0231376	0.044089	0.0594479	0.0133776	0.0421111	0.00967167	0.00200897	0.0297433	0.0209132	0.0612708	0.12687	0.0240348	0.00797867	3.22004e-05	0.0185327	0.0538575	0.0345698
GSM989900	89	0.00670996	0.0635727	0.0120996	0.0039252	0.0271693	0.027112	0.0233694	0.0441975	0.00642683	0.00918165	0.0167818	0.00241891	0.0929539	0.012091	0.159586	0.0873284	0.029104	0.0459896	0.0408933	0.010914	0.0380236	0.0151129	0.0624393	0.00987043	0.0131278	0.0870348	0.0538248	0.015778	0.0134451	0.0246266	0.0118477	0.0274966	0.106667	0.11103	0.0191361	0.0515602	0.0158088	0.00096503	0.0324544	0.0460649	0.0802561	0.141849	0.011188	0.0151167	0.00837035	0.0097495	0.0587407	0.0283521
GSM989904	89	0.00485112	0.0893287	0.00551022	0.0104692	0.00956151	0.0245063	0.0415259	0.0747491	0.0025363	0.00327913	0.0300363	0.0166378	0.302696	0.016352	0.136601	0.0474548	0.0347392	0.0588912	0.0443562	0.00983829	0.0414341	0.0159144	0.00404806	0.0157084	0.0147098	0.113834	0.0460385	0.0175354	0.0173572	0.0157514	0.0115268	0.0261797	0.125811	0.227154	0.0141405	0.117847	0.0188258	3.32765e-05	0.0274087	0.0583691	0.0791676	0.144115	0.0347391	0.0306443	0.00024986	0.0178594	0.0924007	0.0496664
GSM989910	89	0.00784295	0.0893733	0.00577742	0.00285249	0.0151456	0.0212672	0.0214718	0.0611772	0.0044486	0.0100081	0.0274125	0.0034174	0.115389	0.0126179	0.217044	0.0666479	0.0214577	0.064061	0.0414154	0.0059579	0.0519813	0.0131943	0.0152955	0.0145006	0.00695722	0.0568061	0.0322381	0.0162498	0.00907496	0.0163111	0.00134786	0.045796	0.0718153	0.0718171	0.00780433	0.0457671	0.0173292	0.00130012	0.0313016	0.0440436	0.0461105	0.14351	0.0201831	0.0259113	0.00064093	0.00988636	0.066261	0.0243334
GSM990421	89	0.0109508	0.178435	0.0198271	0.0124454	0.0127367	0.0238072	0.0471963	0.0877819	3.44947e-05	0.0101527	0.0292306	0.00297895	0.227304	0.0230341	0.223575	0.107621	0.0159664	0.132891	0.0545568	0.0162885	0.0336143	3.44947e-05	0.0723756	0.0034822	0.00452921	0.165435	0.0280286	0.017921	0.024674	0.0212654	0.00541807	0.0530486	0.189717	0.245382	3.44947e-05	0.117295	0.0280975	0.000296277	0.045974	0.0354284	0.093675	0.142498	0.0720706	0.0464914	0.0137912	0.0118301	0.10239	0.0159344
GSM990467	89	0.00611383	0.0757058	0.00732491	0.00579471	0.00672646	0.00707856	0.0736759	0.0621995	0.0100785	0.00475392	0.00701898	0.00353848	0.091051	0.0242969	0.173834	0.0619294	0.0201811	0.0449227	0.0296889	0.0140952	0.034816	0.00333149	0.00489748	0.00554827	0.0103471	0.105469	0.0448205	0.00517618	0.0223554	0.0139193	0.0162139	0.0202984	0.0924582	0.16149	0.00387774	0.114977	0.0257078	2.26093e-05	0.0239835	0.0451581	0.0685272	0.115653	0.0229615	0.0282502	2.26093e-05	0.0153339	0.053892	0.00663387
GSM990546	89	0.00414813	0.0713026	0.00701602	4.32614e-05	0.018911	0.0223872	0.0307611	0.0469329	0.0133116	0.0187201	0.0174132	0.00330982	0.178744	0.0272416	0.128796	0.0485602	0.0315879	0.0722382	0.0369379	0.00412259	0.0404739	0.00994198	0.00690029	0.00916773	0.00415963	0.114364	0.0533255	0.0158829	0.0178007	0.0182097	0.0184966	0.0366199	0.0801641	0.121815	0.0123333	0.0624397	0.0176455	7.8555e-05	0.0348941	0.0724606	0.0835857	0.121977	0.0180388	0.00945364	4.32614e-05	0.0172568	0.0741528	0.0379777
GSM990547	89	0.0159348	0.164694	0.0144908	0.0155888	0.0119644	0.0200186	0.0513673	0.0659086	0.00262034	0.0256314	0.0506071	0.00318975	0.204	0.0256536	0.128301	0.0516658	0.0335159	0.153957	0.0409269	0.0129595	0.0462619	0.00691006	0.0011337	0.0963939	0.0157623	0.0964564	0.0421148	0.0119252	0.035517	0.00937713	0.0419368	0.0761027	0.194952	0.127847	0.00496573	0.11379	0.0566253	0.00220731	0.0877088	0.0531574	0.0933077	0.197102	0.129088	0.0665597	0.00643495	0.0174613	0.11028	0.0226904
GSM990591	89	2.67804e-05	0.0873031	2.67804e-05	0.00364914	0.0261648	0.0215532	0.00644535	0.0561172	2.67804e-05	2.67804e-05	0.0357171	0.00474291	0.146265	0.0116661	0.107577	0.0327175	0.0318892	0.0332918	0.038823	0.0109024	0.0284686	0.000628751	0.000215188	0.00281504	0.00230335	0.0530114	0.0219117	0.00781714	0.019299	0.0193576	0.0059669	0.0199321	0.0950772	0.13099	0.0113964	0.0343229	0.0103016	0.00478403	0.0251066	0.0417405	0.0625704	0.097409	0.069511	0.0145458	0.00458439	0.0151251	0.0451137	0.0293811
GSM990615	89	0.0100661	0.0797263	3.13801e-05	0.00946436	0.0116805	0.0279662	3.13801e-05	0.0855489	3.13801e-05	0.00913547	0.00712166	0.0015047	0.108741	0.0220005	0.0712732	0.0929349	0.0189367	0.0525156	0.0268878	0.00806642	0.059736	0.0030886	0.00311016	0.0013287	0.0022918	0.0706414	0.0334012	0.012301	0.0204647	0.024464	0.0138987	0.0102317	0.078835	0.0740811	0.00576031	0.0709639	0.0252109	0.00145707	0.0253722	0.0333029	0.0805821	0.114652	0.0406978	0.0253853	0.00428136	0.00754833	0.0850822	0.00511171
GSM989873	88	0.0124155	0.111028	0.0303583	0.0139427	0.0402617	0.0271327	0.0373689	0.149875	0.00655107	0.0287751	0.0352608	0.00792804	0.157035	0.0125513	0.197623	0.0865346	0.0362169	0.197704	0.0759192	0.0305843	0.0815423	0.0218658	0.00447945	0.0196262	0.00359823	0.236931	0.104944	0.00843278	0.0334455	0.0162782	0.0223851	0.125013	0.254746	0.317097	0.0171699	0.0977116	0.063936	0.00560184	0.0679311	0.0385349	0.076563	0.190652	0.150917	0.117501	0.00597048	0.0124102	0.190485	0.0544283
GSM990069	88	0.00787537	0.0733744	0.0161273	0.0521662	0.00883065	0.0155657	0.0654519	0.144629	0.00231241	0.0156156	0.0288895	0.00132716	0.128301	0.0210102	0.0651851	0.043568	0.0190354	0.111026	0.035966	0.0146943	0.0693008	0.00289588	0.00726606	0.00573708	0.0110735	0.0886088	0.0984807	0.0120275	0.0149595	0.0292438	0.0173115	0.0365621	0.125726	0.242621	0.00630728	0.111329	0.0105903	4.06845e-05	0.035788	0.024911	0.0752374	0.159861	0.170069	0.0121611	0.00606515	0.00619794	0.0666942	0.0398935
GSM990584	88	0.000438412	0.080806	3.49197e-05	0.00614833	0.0144158	0.0174998	0.00650831	0.0396086	0.000973536	0.0145435	0.00604876	3.49197e-05	0.103903	0.0305965	0.169654	0.0333883	0.012649	0.0576271	0.032309	0.000807563	0.0362084	0.00490827	0.0145539	0.00400635	0.000387996	0.0334952	0.0235491	0.00110861	0.0124333	0.016971	0.00520732	0.0546727	0.0798873	0.111848	0.012202	0.0362435	0.0137934	0.000971095	0.0261018	0.0599001	0.0906838	0.125398	0.0191822	0.0185803	0.000539548	3.49197e-05	0.0537021	0.0116597
GSM990602	88	0.0045783	0.0759679	0.00627068	0.00964498	0.0269003	0.0208639	0.0241721	0.134067	6.44273e-06	0.00992762	0.0362531	0.000342323	0.324285	0.011428	0.102925	0.104037	0.0355939	0.0529525	0.0391915	0.019071	0.106989	6.44273e-06	0.0800958	0.0203272	0.012173	0.073572	0.0264395	0.0140932	0.0179858	0.00459645	0.0100485	0.0397178	0.0638646	0.171004	0.00297828	0.111939	0.0207598	0.00443774	0.0348792	0.0410527	0.0879389	0.139958	0.0435682	0.0216096	0.0108219	0.0147318	0.0818035	0.0321351
GSM989832	87	0.00692526	0.196565	0.0235929	0.0762728	0.0196281	0.0269	0.175407	0.136951	0.0135551	0.0721102	0.0643547	0.00379776	0.244847	0.0294977	0.131828	0.143634	0.0347226	0.196282	0.108717	0.0465721	0.0806046	0.0100466	0.087148	0.0221692	0.00748263	0.205334	0.118323	0.0164023	0.0308999	0.0258663	0.0100124	0.0740885	0.223807	0.286363	0.0508759	0.177215	0.0890829	0.00281025	0.0903393	0.0446059	0.0813139	0.154989	0.157394	0.0928132	0.00396945	0.0209427	0.143657	0.0384135
GSM989867	87	0.00934442	0.0588027	0.00822931	0.00557697	0.0322061	0.0325744	0.00622476	0.0468252	0.0124532	0.0130885	0.0141953	0.00797635	0.0851419	0.0263914	0.134645	0.0700281	0.0427477	0.0385786	0.0272673	0.00199771	0.0448048	0.0258992	0.0170573	0.0174753	0.01511	0.0460388	0.039594	0.0173887	0.0101841	0.0168319	0.0199527	0.0235523	0.0722384	0.108248	0.00853778	0.0445625	0.00798683	0.00782094	0.0248965	0.043771	0.0802167	0.145815	0.0162633	0.012343	0.0032133	0.00929045	0.0584481	0.0584062
GSM989871	87	0.00761275	0.129728	0.00801821	0.00778737	0.0220499	0.0207538	0.0602753	0.0839161	0.000861782	0.0299265	0.0520633	0.00830314	0.152716	0.0164927	0.195753	0.06962	0.0378433	0.172773	0.0456097	0.0133338	0.0488782	0.0148101	0.00432962	0.0253655	0.000958854	0.133237	0.100437	0.0132308	0.0267253	0.017358	0.0162698	0.0418434	0.134472	0.236349	0.00573228	0.0985999	0.0321294	0.00335346	0.077995	0.0395167	0.0760507	0.17467	0.0993974	0.0494971	0.00325412	0.0114436	0.0857597	0.0390226
GSM990044	87	0.00330008	0.146083	0.0059715	0.0207663	0.0198253	0.0188376	0.0689083	0.0304897	0.00159756	4.68446e-05	0.00849941	4.68446e-05	0.0982152	0.0244666	0.162647	0.081218	0.0430148	0.0700986	0.0328913	0.00581093	0.293959	0.00839689	4.68446e-05	4.68446e-05	4.68446e-05	0.212376	0.0579674	0.0079315	0.00946855	0.0182396	0.00771668	0.0349225	0.0815472	0.148507	0.0118692	0.11064	0.0182717	4.68446e-05	0.0308292	0.0397398	0.0768558	0.141248	0.181112	0.0154287	4.68446e-05	0.033639	0.101519	0.0315292
GSM990563	87	0.0112587	0.0492677	4.01947e-05	0.00556098	0.0188379	0.0253444	0.0244298	0.0610822	0.00184971	0.0164198	0.0199861	0.00660371	0.1007	0.0252653	0.183013	0.077289	0.0290566	0.0917702	0.0388553	0.0147464	0.0518917	0.0134677	0.00960509	0.0136164	0.00519662	0.0673452	0.0357916	0.0133299	0.0182389	0.0327008	0.0207473	0.0116205	0.104112	0.0977596	0.00999704	0.0699243	0.0156388	0.00423441	0.0325438	0.0539158	0.0857012	0.126908	0.032218	0.0208971	0.00278838	0.0069436	0.108313	0.0385812
GSM990578	87	0.0035632	0.119849	3.38939e-05	0.0485132	0.0150679	0.0281738	0.0519732	0.130235	0.00714884	0.0119836	0.017268	0.00403645	0.160059	0.0237161	0.218053	0.13638	0.027619	0.0842197	0.0173581	0.0293646	0.0557921	0.0140288	0.0776399	0.0104126	0.0140591	0.126234	0.0434035	0.0183599	0.0151552	0.0132687	0.00729113	0.0888095	0.114957	0.197153	0.0224776	0.0868856	0.00793851	0.0025569	0.0344574	0.0512864	0.0629843	0.130764	0.0722223	0.0204397	3.38939e-05	0.0182336	0.0838904	0.0230125
GSM989956	86	0.0130718	0.212623	0.015781	0.0276076	0.0151713	0.0280232	0.13384	0.0944822	0.0242803	0.005597	0.0339641	0.00674365	0.247193	0.0233832	0.259543	0.153528	0.0360922	0.225	0.105591	0.104048	0.113025	0.0137516	0.00264886	0.0352288	0.0147635	0.195558	0.0933044	0.0145929	0.0270747	0.0417713	0.0153387	0.0897139	0.233729	0.315887	0.0269564	0.162534	0.0488053	0.00641945	0.126903	0.0456991	0.102127	0.248425	0.205729	0.130214	0.00926676	0.0152846	0.127276	0.037738
GSM990001	86	0.00261326	0.160302	0.00317732	0.0257127	0.00531934	0.00491744	0.0362599	0.0757219	3.6051e-05	3.6051e-05	0.0102959	3.6051e-05	0.152472	0.00688589	0.154521	0.124678	0.0205201	0.133642	0.0382588	0.000349239	0.0584086	0.00338272	3.6051e-05	3.6051e-05	0.00202701	0.108822	0.042517	0.00447957	0.0261249	0.00643813	0.00739738	0.0366503	0.18378	0.204489	3.6051e-05	0.0864889	0.0337561	3.6051e-05	0.000504363	0.0437683	0.0691524	0.138234	0.0223334	0.0315271	3.6051e-05	3.6051e-05	0.115796	0.0150721
GSM990063	86	0.0106636	0.227861	0.0201949	0.0234972	0.0189391	0.0269541	0.166197	0.0725368	0.0229668	0.0557647	0.0324554	0.00760013	0.181054	0.0223263	0.234263	0.174267	0.0344942	0.272256	0.0416949	0.016563	0.0818337	0.0139295	0.00322319	0.119193	0.00163231	0.242452	0.0551423	0.0201348	0.0617194	0.0385189	0.0154746	0.0965996	0.189492	0.287784	0.112204	0.120284	0.116264	0.00289511	0.0978813	0.0555773	0.0764994	0.258045	0.203432	0.0864973	0.00630169	0.0205806	0.103043	0.0207034
GSM990560	86	0.0110701	0.235568	0.00532542	0.0692051	0.0199213	0.0181614	0.101549	0.140148	3.83115e-05	0.0481088	0.0330805	0.000955409	0.194722	0.03388	0.169099	0.118504	0.0226144	0.298892	0.0534172	0.0332378	0.117801	0.00686198	3.83115e-05	0.029513	0.0118682	0.200753	0.0569375	0.00736451	0.0293088	0.0235814	0.0216239	0.0695862	0.188082	0.289579	0.00107384	0.195747	0.0619226	0.00436718	0.0887357	0.0475899	0.0857545	0.155475	0.0832261	0.1016	0.0192311	0.0214644	0.115255	0.0367057
GSM990612	86	0.00939737	0.0509743	0.00352588	3.36689e-05	0.0141287	0.0308831	0.0120032	0.0347897	0.000853562	0.00798215	0.124855	0.000305459	0.128837	0.0235914	0.190063	0.0605605	0.0319876	0.0291591	0.0399895	0.00733545	0.031781	0.00325227	6.82254e-05	0.0124884	0.0105018	0.0613088	0.0260611	0.00697842	0.0219336	0.0313036	0.0131842	0.0200296	0.0643202	0.116583	0.00118499	0.0471654	0.0164262	0.00546917	0.0179151	0.0607024	0.104714	0.153074	0.0436259	0.0161456	0.00137773	0.016308	0.0713267	0.0141643
GSM989866	85	0.00681823	0.116417	0.0088429	0.00906385	0.0222098	0.0197165	0.0399518	0.079352	0.00647599	0.0105404	0.02354	0.0186519	0.140367	0.0105582	0.138769	0.0918794	0.0330563	0.0882847	0.0659541	0.0180768	0.055244	0.0155486	0.0464358	3.19871e-05	0.00592378	0.143195	0.047525	0.0157924	0.0173264	0.0128413	0.0130768	0.0400324	0.165981	0.255271	0.0253013	0.092084	0.0385511	0.000177014	0.0227371	0.0403022	0.0607265	0.158891	0.0388589	0.0389324	0.00300139	0.0119008	0.102141	0.0326272
GSM989872	85	0.00661121	0.120238	0.00406807	0.013231	0.0291722	0.0237528	0.135588	0.0546772	0.00283979	0.0196045	0.0173833	0.00452609	0.1692	0.0188032	0.183245	0.0320442	0.0231027	0.114814	0.040559	0.0225107	0.0316359	0.0123857	0.00834884	0.0302071	0.00658231	0.123472	0.0381563	0.0134281	0.0152053	0.0262819	0.0147263	0.0408722	0.133702	0.155796	0.0279473	0.0781531	0.0217086	0.00421234	0.0240161	0.0394283	0.070591	0.159296	0.0610583	0.0240195	0.00164132	0.000931478	0.0890017	0.0355616
GSM989902	85	0.00796147	0.0872615	0.00757373	0.00597801	0.0275946	0.0293996	0.0479746	0.0747838	0.00425067	0.0268264	0.0338558	0.0173944	0.0912067	0.0240748	0.168849	0.0849037	0.0268254	0.0769117	0.0244741	0.0160569	0.0494617	0.0186123	0.00517105	0.0200941	0.0138183	0.0666986	0.0425059	0.0149756	0.0183599	0.0229383	0.0189476	0.0320152	0.134939	0.145282	0.0127482	0.0626313	0.0398474	0.0111754	0.0497483	0.057371	0.0834324	0.140684	0.0335347	0.0179033	0.00169996	0.017778	0.0751744	0.0596222
GSM989911	85	0.0109608	0.06126	3.05541e-05	0.0048684	0.00956202	0.0160463	0.0379338	0.060616	0.00349261	0.00294955	0.00398798	0.00409916	0.138418	0.0127999	0.315517	0.0304736	0.0321927	0.0391194	0.0374271	0.0076795	0.060362	0.00360022	0.00288362	0.0154852	0.00514937	0.0609603	0.0238642	0.00225286	0.00713482	0.011767	0.0069121	0.0176348	0.131934	0.081536	0.0199127	0.0478145	0.0244725	3.05541e-05	0.0158269	0.0481294	0.0625039	0.14093	0.0146561	0.0295629	0.00418302	0.00541661	0.0654961	0.0332471
GSM989921	85	0.00353566	0.138557	3.83988e-05	0.0240863	0.0086484	0.0294204	0.0307243	0.0583028	0.0104995	3.83988e-05	0.0133344	3.83988e-05	0.105904	0.0169091	0.218181	0.0637489	0.0141767	0.139483	0.0235771	0.0238399	0.0555191	0.0140153	3.83988e-05	0.0104684	0.0122476	0.132075	0.0676064	0.0189493	0.00864907	0.0203897	0.0212429	0.0275848	0.178484	0.180424	3.83988e-05	0.076915	0.0301923	3.83988e-05	0.0399801	0.000911441	0.052863	0.144702	0.0553879	0.0386908	3.83988e-05	0.00638666	0.0751622	0.0161943
GSM990020	85	0.00822895	0.117151	0.00739123	0.0246428	0.0108156	0.0167164	0.00967625	0.0713938	1.03575e-05	0.0021169	0.0248761	0.00143903	0.085306	0.0149938	0.180221	0.0377644	0.0344014	0.108515	0.0347282	0.00840547	0.0404583	0.0025586	0.00415105	0.00825467	0.0187353	0.137457	0.0340932	0.0142803	0.0130428	0.017333	0.00726481	0.0164754	0.222018	0.141027	0.0313379	0.0572888	0.010313	0.00527179	0.0195436	0.0468965	0.0770937	0.146037	0.0370393	0.0152272	1.03575e-05	0.00730432	0.0971144	0.018373
GSM990055	85	0.0132617	0.160817	0.0121008	0.00893212	0.0167766	0.0228876	0.0614944	0.13021	0.0149951	0.024478	0.0201864	0.0230467	0.169413	0.0237786	0.169016	0.121769	0.0533765	0.172978	0.0647426	0.0309071	0.0736433	0.0108278	0.0111999	0.00613279	0.011651	0.108852	0.0629639	0.020795	0.0395455	0.0195086	0.019756	0.0751196	0.17082	0.2164	0.0147388	0.144448	0.0590685	0.00644297	0.0546152	0.0623986	0.0810534	0.135341	0.0419864	0.0446807	0.00505063	0.0164922	0.107752	0.0191398
GSM990406	85	0.00702814	0.126487	0.00282118	0.0106078	0.0157481	0.0126939	0.0217623	0.104997	0.00795917	0.00482649	0.0224279	0.010593	0.11258	0.0129005	0.135861	0.0955518	0.022005	0.116017	0.0221379	0.0237769	0.0421883	0.00388315	0.0146339	0.00270149	0.0138649	0.123708	0.0381066	0.0144606	0.0494159	0.00878078	0.00491953	0.037534	0.150805	0.127628	0.0182577	0.0652054	0.0354486	0.0022016	0.0593737	0.0442439	0.0795707	0.139183	0.0411677	0.0429751	0.00185264	0.0291535	0.0865892	0.0237262
GSM990557	85	0.000254499	0.114267	0.00952681	0.00615078	0.0129399	0.0180256	0.0840797	0.0850626	0.004975	3.46603e-05	0.0233926	0.004227	0.183751	0.0118139	0.144198	0.0527255	0.0273777	0.129972	0.024831	0.00114825	0.133543	0.00864151	3.46603e-05	0.0126358	0.0174874	0.0831455	0.0433069	0.0196692	0.0161612	0.0239759	0.011049	0.0491089	0.185292	0.10308	0.0204295	0.0962004	0.0267836	0.00431661	0.0427494	0.0351225	0.0770235	0.157177	0.0858445	0.0356909	3.46603e-05	0.00871023	0.0834386	0.0174397
GSM990559	85	0.00532504	0.131271	0.0153559	0.00810509	0.0167052	0.0326799	0.02152	0.0648583	3.68047e-05	0.0266989	0.0374583	3.68047e-05	0.133836	0.0202465	0.230852	0.0639872	0.0313803	0.16793	0.0326779	0.0112935	0.0895806	0.00840066	0.00773784	0.0355182	0.018111	0.11314	0.0338246	0.014922	0.0241177	0.0228913	0.01029	0.0444384	0.161297	0.166552	0.0155808	0.0622625	0.0275271	0.00546627	0.0465751	0.0507827	0.0815642	0.137085	0.053515	0.0309307	0.0035062	0.020595	0.0649219	0.029215
GSM990569	85	0.0115747	0.172475	0.00760411	0.0184521	0.0306707	0.0244302	0.0342887	0.119231	0.00672969	0.00996441	0.0287506	0.00293819	0.126851	0.0133906	0.0504073	0.0944724	0.0342022	0.224183	0.0379718	0.00490817	0.0469826	0.00891927	0.0704657	0.00489555	0.0214481	0.16094	0.0516376	0.0152822	0.0231182	0.0177225	0.0155525	0.0558417	0.158835	0.202238	0.0072228	0.0820927	0.0336518	0.00604958	0.0327341	0.0577385	0.0846424	0.136258	0.101126	0.0370417	0.00451462	0.00831854	0.10596	0.0537484
GSM990571	85	0.00473476	0.0954708	0.00870188	0.00935316	0.0228956	0.028374	0.00826228	0.064333	0.00605512	0.00717535	0.0244635	0.00148281	0.15898	0.0288197	0.185599	0.0626408	0.0311042	0.0792727	0.012027	0.0134903	0.0242735	3.69519e-05	0.0140079	0.0106209	0.00880007	0.0411767	0.0225785	0.0157045	0.0210868	3.69519e-05	0.00780917	0.0274293	0.104986	0.0597531	3.69519e-05	0.0558148	0.0337975	0.0115317	0.0327633	0.0495064	0.080534	0.143072	0.0187283	0.0395408	0.00392085	0.00780624	0.0825287	0.00886165
GSM990572	85	0.00664067	0.146738	0.00375923	0.0100429	0.0159245	0.0237308	0.0992	0.102818	0.00378378	0.0154703	0.0205029	4.08647e-05	0.165626	0.0249916	0.162318	0.118455	0.0368533	0.138164	0.0586358	0.0116135	0.0597854	4.08647e-05	0.00240206	0.0145325	4.08647e-05	0.138263	0.109182	0.0182053	0.0258103	0.0174997	0.000406552	0.0586605	0.18761	0.239043	0.0112368	0.0751364	0.0273188	0.0067107	0.0451374	0.0454304	0.079148	0.159502	0.103236	0.0372633	4.08647e-05	0.0131035	0.10921	4.08647e-05
GSM990576	85	0.00962097	0.0777763	0.00986213	0.00388666	0.0171249	0.027037	0.00746684	0.0559267	0.00917603	0.0107912	0.0151524	0.0118084	0.126773	0.0255957	0.142548	0.0423435	0.0388932	0.0604934	0.0279954	0.0114609	0.0560795	0.00686632	0.00931893	0.0118971	0.00168969	0.0684692	0.0351862	0.00659699	0.0172261	0.0202417	0.0242386	0.0354754	0.0704372	0.10407	0.00517175	0.0477218	0.0427613	0.00152406	0.0398293	0.0465805	0.083137	0.133106	0.0216826	0.0199445	0.0056022	0.0182356	0.0798535	0.0287471
GSM989850	84	0.0101913	0.0595567	0.00617018	0.00845126	0.0297463	0.0196395	0.017113	0.0441207	0.00460526	0.00120832	0.0142192	0.00597968	0.201036	0.0161224	0.141609	0.076049	0.0399351	0.0346942	0.0157903	0.00797168	0.0245997	0.018245	0.00320983	0.0193811	0.0192351	0.0418771	0.0352754	0.0155986	0.0128854	0.00877537	0.0167874	0.00982778	0.0228938	0.086443	0.00262323	0.0294508	0.0296246	0.00777127	0.0317932	0.0555776	0.0709973	0.156435	0.0214727	0.00780466	0.00704965	0.0223017	0.0671312	0.042989
GSM989865	84	0.0104043	0.194043	0.00313237	0.0094639	0.0227443	0.0131921	0.0851941	0.123797	3.86067e-05	0.0236861	0.0447937	0.00994961	0.216265	0.00969866	0.167694	0.150544	0.0298113	0.171412	0.0691894	0.0179541	0.0862943	0.0150433	0.0433743	0.0173498	0.0129525	0.187925	0.0739194	0.0163226	0.0352922	0.0239432	0.0251824	0.0830787	0.240485	0.27112	0.0207718	0.129579	0.0681942	0.00199533	0.0765298	0.0601209	0.061988	0.160845	0.0756942	0.0438501	0.00198653	0.0237417	0.112212	0.0416178
GSM989888	84	0.00872218	0.157888	0.00973519	0.028003	0.00615879	0.0187164	0.0377027	0.0841881	0.0110957	0.0221976	0.0429215	0.0109231	0.154283	0.0113395	0.194659	0.128326	0.0339481	0.149381	0.0676824	0.0488801	0.0871323	0.00522867	0.0563101	0.0081114	0.0110464	0.144502	0.0749891	0.0209436	0.0329526	0.0202636	0.0211992	0.0370344	0.240851	0.224029	0.0352115	0.159656	0.0323533	0.002551	0.0419581	0.0568825	0.0698117	0.212151	0.101639	0.0536149	0.00640591	0.0138887	0.106071	0.0376238
GSM989915	84	0.00777206	0.0561389	0.00941604	0.00200037	0.0217103	0.0184849	3.22928e-05	0.0374886	0.00542625	3.22928e-05	0.0250883	0.0079478	0.0850565	0.0157854	0.122681	0.0796409	0.0315005	0.0469453	0.0335554	0.00179428	0.0522968	0.0148332	0.00749947	0.00737248	0.00499314	0.102009	0.0353275	0.0111073	0.0137072	0.0243307	0.0222609	0.00987254	0.0743774	0.0466575	0.004262	0.0359258	0.0165379	3.22928e-05	0.0180473	0.0379546	0.0534454	0.120725	0.0182654	0.0154233	0.00296416	0.020421	0.0637833	0.0267667
GSM989923	84	0.00166687	0.104077	0.0025442	3.58016e-05	0.026756	0.0176399	0.0273119	0.0662365	3.58016e-05	0.0128107	0.00506677	0.0154341	0.0684795	0.00209355	0.0368217	0.0113893	0.0447702	0.109297	0.0234771	0.021739	0.070395	0.0082718	0.0125838	0.00362838	0.0123265	0.0655062	0.0438829	0.016761	0.0100481	0.00712288	0.00636119	0.0150467	0.129879	0.135091	3.58016e-05	0.0784862	0.0138222	0.00865958	0.0313822	0.0400905	0.0650207	0.152076	0.0183397	0.0244685	0.00121129	0.00845553	0.145512	0.0336737
GSM989928	84	0.0081348	0.0681502	0.00270667	0.00719264	0.0221554	0.0270715	0.0154787	0.0608718	0.00042098	0.0249044	0.0319571	0.00896925	0.0878146	0.01863	0.134985	0.0489525	0.0348177	0.076677	0.0243674	0.00985048	0.0422815	0.00243475	0.00236885	0.0103742	0.0078766	0.160965	0.0467603	0.0177226	0.0122927	0.0147115	0.00513521	0.0180414	0.109842	0.136339	0.00353436	0.0545833	0.0204288	0.00145039	0.0349032	0.036727	0.0811695	0.158481	0.0651475	0.0324236	0.00358664	0.0140088	0.0850197	0.0381564
GSM990005	84	0.00698656	0.146504	0.0039119	0.016207	0.0174971	0.0203877	0.113566	0.103436	0.0129269	0.0135579	0.0464476	0.017405	0.219153	0.0108173	0.216596	0.071362	0.0300999	0.193971	0.0331276	0.0167195	0.0794829	0.0104433	0.0241991	0.00113406	0.011335	0.141935	0.0582149	0.0172269	0.0440833	0.0132088	0.0107266	0.0563154	0.196914	0.236827	0.0100231	0.135012	0.0388522	0.00111559	0.0676268	0.0636087	0.0806009	0.157161	0.0681883	0.0549487	0.00300394	0.0116685	0.113106	0.038144
GSM990409	84	0.0128375	0.127455	0.00688819	0.0438963	0.00500885	0.0135611	0.0360195	0.150946	3.61976e-05	0.0102722	0.0359153	3.61976e-05	0.230215	0.00651275	0.151646	0.0955123	0.0229147	0.120989	0.0720985	0.0185455	0.0625601	3.61976e-05	3.61976e-05	0.00450517	0.00307183	0.130996	0.0697882	0.0107031	0.0336499	0.007727	0.010354	0.042298	0.245767	0.255736	3.61976e-05	0.180091	0.0458038	3.61976e-05	0.0803819	0.0528935	0.0642668	0.169268	0.0658914	0.083231	3.61976e-05	0.00439725	0.10842	0.0311153
GSM990443	84	0.0103999	0.0826922	0.00627408	0.0371525	0.0134151	0.0239563	0.0392195	0.0600023	0.0129254	0.0238409	0.0315813	0.00535059	0.116339	0.021345	0.189617	0.0486541	0.0307829	0.0605639	0.0225178	0.0103649	0.0465969	0.00155947	0.00756825	0.0078299	0.00774811	0.0744533	0.0403805	0.00993116	0.0275248	0.0121958	0.0177089	0.0462188	0.15024	0.156225	0.00251268	0.0566076	0.0263405	0.011221	0.0268578	0.046742	0.079724	0.155278	0.10541	0.0328317	0.00918183	0.01207	0.0949636	0.0194481
GSM990486	84	0.0119897	0.10543	0.00383507	0.00555881	0.0240875	0.0185876	0.0741712	0.0523755	0.00238928	0.0185919	0.0144141	0.0139316	0.0907078	0.0184991	0.153663	0.0441317	0.0317473	0.122644	0.0376345	0.0309737	0.101194	0.00461497	3.83356e-05	0.00608736	0.00585309	0.0968003	0.0368568	0.0130652	0.00799823	0.0290531	0.0190354	0.0528873	0.144564	0.149455	3.83356e-05	0.0707072	0.0167497	0.000449412	0.0328505	0.0444316	0.0644307	0.134778	0.0255074	0.0364445	0.00329462	0.00801829	0.0812827	0.0167722
GSM990573	84	0.00174598	0.178067	0.00566365	0.0584253	0.0197171	0.0217968	0.0956185	0.065235	0.00809212	0.0271487	0.0964676	1.14453e-05	0.182601	0.0231537	0.273017	0.12859	0.0348151	0.218768	0.0451645	0.0727349	0.0749306	0.00867823	1.14453e-05	0.015057	0.0173071	0.27418	0.0545201	0.0104267	0.0139768	0.0618596	1.14453e-05	0.0474644	0.216441	0.177764	0.00665897	0.176184	0.0859467	1.14453e-05	0.054914	0.0583951	0.0942518	0.167383	0.136105	0.0624172	1.14453e-05	0.00274572	0.131414	0.0251268
GSM990579	84	2.93685e-05	0.0664183	0.000645421	0.00311286	0.0103798	0.0191506	0.052778	0.0677622	0.0042368	0.0124717	0.0135841	2.93685e-05	0.0780441	0.0160575	0.158466	0.0473935	0.0188764	0.0686149	0.0108139	0.00185355	0.0317409	0.00449314	0.0562466	0.0067	0.0066543	0.0763195	0.0319476	0.00894324	0.00976981	0.0197459	0.0134824	0.0251389	0.0916975	0.104456	0.0106124	0.0686595	0.00679542	0.00275249	0.0388683	0.0326414	0.0716049	0.088441	0.0401751	0.0110844	0.00347765	0.0134089	0.0485063	0.014796
GSM989836	83	0.0130955	0.110737	0.0319553	0.0191845	0.0229595	0.0292728	0.0530389	0.0797824	0.0128562	0.0211407	0.0530143	0.0167757	0.0957722	0.0250972	0.190176	0.0629232	0.0375264	0.0991129	0.0369471	0.0108196	0.0688161	0.017494	0.034223	0.0173099	0.0170925	0.0950047	0.197075	0.0135598	0.0270252	0.0644158	0.0137418	0.0106092	0.10827	0.300932	0.0229556	0.0740349	0.0483622	0.00571755	0.0473627	0.0637036	0.0962246	0.175525	0.114375	0.0379177	0.00817485	0.0141214	0.112644	0.054569
GSM990027	83	0.00624703	0.0924919	0.0141862	0.00425685	0.00859112	0.0197854	0.0744521	0.1105	4.19463e-05	0.0140166	0.014583	0.00130752	0.102027	0.0146615	0.156386	0.0475146	0.0410972	0.126146	0.0284293	0.0102396	0.0782468	0.00592385	0.00019403	0.00904275	0.00283065	0.120784	0.0571357	0.0179235	0.0206575	0.0138092	0.0109433	0.0469712	0.166274	0.248764	0.0188833	0.0988234	0.0252184	4.19463e-05	0.0358112	0.0556697	0.0526015	0.125835	0.0693497	0.0394697	0.000935016	0.00499813	0.0823884	0.0261982
GSM990064	83	0.00830547	0.170244	0.0409797	0.0354548	0.0130779	0.0246099	0.12107	0.214533	0.00526095	0.0918997	0.0951033	0.00253883	0.246232	0.0128926	0.223481	0.124994	0.0288158	0.120238	0.0669571	0.081577	0.125291	4.47034e-05	0.0727944	0.0446831	0.0126435	0.283859	0.20569	0.019518	0.0160069	0.0395795	0.00787984	0.0667824	0.311496	0.341617	0.0136019	0.109679	0.0903379	0.00200615	0.0314919	0.077479	0.0633078	0.23223	0.328002	0.113346	0.00225144	0.0140335	0.124721	0.0181146
GSM990398	83	0.00482503	0.205836	0.000152018	0.0284613	0.0184296	0.0189635	0.155771	0.116343	0.0113952	0.0266107	0.0295544	3.93708e-05	0.210186	0.0171835	0.100458	0.109388	0.0246389	0.197973	0.0522101	0.0170114	0.0707429	0.00879385	0.0167564	0.0408961	0.00559066	0.219626	0.111889	0.0215679	0.0182447	0.0182448	0.0157781	0.112484	0.193703	0.181686	0.0416888	0.111441	0.080274	3.93708e-05	0.07573	0.0400163	0.0875179	0.20128	0.149843	0.0685769	0.00749756	0.000152536	0.0929323	0.00530124
GSM990544	83	0.000659449	0.0734132	0.0136611	0.0164044	0.0256733	0.0331021	0.0023081	0.0922075	0.00027504	0.0107636	0.00899934	0.00170851	0.135738	0.0239611	0.14899	0.0490155	0.0282701	0.115448	0.0190519	0.0148888	0.021841	0.010546	0.00298277	0.0110204	0.00640182	0.122116	0.0422717	0.0087737	0.0213632	0.0195595	0.0203345	0.0295823	0.11462	0.117754	3.21657e-05	0.0532754	0.0298461	0.0100058	0.052053	0.0557329	0.0676202	0.155083	0.0324934	0.012846	0.00671753	0.00501264	0.0594901	0.0209544
GSM990574	83	0.00590431	0.117764	0.00604754	0.00199666	3.17586e-05	0.026078	0.0127498	0.0340296	0.00379905	0.00388707	0.028784	0.00010517	0.0505684	0.0324216	0.155985	0.023228	0.0172987	0.162985	0.0134099	0.00645663	0.0278364	0.00634098	3.17586e-05	0.00717425	3.17586e-05	0.123205	0.0397356	0.011885	0.0113262	0.0266082	0.0135099	0.0200638	0.0750586	0.12905	0.0118285	0.0491843	0.00668818	0.00167945	0.00976799	0.0415024	0.0844464	0.118972	0.0703504	0.0212664	3.17586e-05	0.0191558	0.0533635	0.00737676
GSM990605	83	0.0146808	0.149106	0.00285516	0.0238186	0.0124641	0.0362448	0.241602	0.131179	3.64508e-05	0.0139524	0.0426853	3.64508e-05	0.198794	0.0224969	0.171476	0.136364	0.0290373	0.236706	0.0764237	0.0403148	0.0398686	3.64508e-05	0.0938646	0.000382825	3.64508e-05	0.21778	0.0980594	0.00989023	0.0223124	0.00547077	0.00223195	0.0983276	0.167685	0.152623	0.0615483	0.129179	0.0612398	3.64508e-05	0.0856594	0.0353822	0.0785473	0.145439	0.135751	0.0769502	3.64508e-05	0.0110338	0.147243	0.0208182
GSM990606	83	0.0200482	0.0877826	2.18243e-05	2.18243e-05	0.0160873	0.0215164	0.0102722	0.055037	2.18243e-05	0.00080283	0.0282706	2.18243e-05	0.122945	0.0218112	0.205228	0.0775397	0.0135108	0.110533	0.00311992	0.0171189	0.0200501	0.00182432	0.000383972	0.0118841	2.18243e-05	0.0680981	0.0231649	0.00132332	0.0242266	0.0307674	0.00568771	0.0149627	0.0672907	0.124917	2.18243e-05	0.0885891	0.0216982	0.00985112	0.0344534	0.0454944	0.0897705	0.119324	0.0305598	0.0225521	2.18243e-05	2.18243e-05	0.0700886	2.18243e-05
GSM989837	82	0.016086	0.160242	0.0156838	0.0216692	0.0196983	0.0248789	0.0903711	0.102598	0.0175684	0.0156718	0.0256921	0.00876077	0.131859	0.0184334	0.100212	0.227504	0.0211091	0.190988	0.0675208	0.0274772	0.0620307	0.0164511	0.00726124	0.0239993	0.0094261	0.195737	0.0747224	0.0157438	0.0248441	0.0180987	0.0201193	0.0485064	0.180979	0.108348	0.0244422	0.12354	0.0503484	0.00867979	0.0778144	0.040406	0.0726053	0.1588	0.073187	0.0496584	0.00605252	0.0147675	0.100239	0.0396082
GSM989859	82	0.00883757	0.142507	0.000951092	0.00490551	0.0227659	0.0266163	0.0375548	0.074811	0.00779462	0.00819601	0.0301575	0.00500531	0.125641	0.0158476	0.162516	0.125302	0.0371322	0.137274	0.0506704	0.0186666	0.0566065	0.0141701	0.00409943	0.0186239	0.00976398	0.110799	0.0496765	0.0154069	0.0241586	0.0289523	0.0113332	0.0392891	0.180901	0.176454	0.0219646	0.105165	0.0299087	0.00511501	0.0398347	0.0571064	0.0770558	0.179142	0.0531067	0.0449186	0.00742936	0.0168596	0.0831901	0.0335618
GSM990023	82	0.0128796	0.074335	0.00677693	0.000132731	0.0075466	0.0217545	0.0242351	0.142486	4.35905e-05	0.0110474	0.0277269	0.0078859	0.134716	0.0125699	0.19088	0.136986	0.0378856	0.0799753	0.0345735	0.0284178	0.063965	4.35905e-05	0.00294727	0.0017082	0.00643972	0.119297	0.0426949	0.0141896	0.0133481	0.00737723	0.0122395	0.0205519	0.141697	0.195455	4.35905e-05	0.0724501	0.0229074	4.35905e-05	0.041959	0.0518404	0.073838	0.133897	0.0406912	0.0296295	0.00444712	0.0141522	0.0882545	0.00781975
GSM990026	82	0.00636315	0.12054	0.0186393	0.026143	0.0164546	0.0258309	0.101315	0.0881426	0.00813045	0.0155367	0.0319971	0.00144827	0.189344	0.0220737	0.177785	0.0932645	0.0368978	0.183176	0.0430584	0.0325919	0.0687702	0.0159262	0.0261657	0.0193206	0.00818395	0.220893	0.102266	0.0149764	0.0324493	0.019619	0.0089688	0.0375729	0.197499	0.28892	0.00908203	0.09446	0.0284828	0.00442727	0.0362585	0.0475534	0.0648628	0.182858	0.0805727	0.0380344	0.00136792	0.0145832	0.129078	0.0275605
GSM990040	82	0.00243458	0.0840201	0.00691795	0.000649905	0.0106019	0.0169296	0.0460864	0.106793	0.0116876	0.00939089	0.019043	0.00429263	0.152477	0.013155	0.200061	0.0847885	0.0260456	0.0881373	0.0563077	0.0227493	0.071242	0.0061506	3.83836e-05	0.00429163	0.0204625	0.0895086	0.0569005	0.0188284	0.0261602	0.0140766	0.011709	0.0511818	0.140741	0.244133	3.83836e-05	0.0914431	0.0302226	0.00167783	0.0576255	0.070802	0.0804344	0.163325	0.0538907	0.0266276	0.00411726	0.00828525	0.0852804	0.013024
GSM990403	82	0.0165824	0.163816	0.00950242	0.0558547	0.0175991	0.0170196	0.12262	0.123845	0.0134561	0.0273831	0.0422342	4.03098e-05	0.180555	0.0181105	0.134428	0.187348	0.0339527	0.150524	0.0588066	0.0422874	0.0799422	0.00870083	4.03098e-05	0.00887988	0.0025523	0.147384	0.0615726	0.0132792	0.0262713	0.0274634	4.03098e-05	0.0582784	0.203758	0.176994	0.0219261	0.116705	0.146636	4.03098e-05	0.0547929	0.0391781	0.0771272	0.147689	0.126791	0.0549714	4.03098e-05	0.00235019	0.096362	0.0149219
GSM990457	82	0.0148682	0.1233	0.0012889	0.00807552	0.015218	0.0228333	0.063996	0.0791511	0.00992527	3.31572e-05	0.0152027	0.00650856	0.127747	0.0365347	0.198895	0.059006	0.0305354	0.148939	0.0435057	0.0136935	0.108114	0.000412743	0.00220498	0.0108577	3.31572e-05	0.0776755	0.0368129	0.0150819	0.0165625	0.0209809	0.0111809	0.030862	0.129117	0.157119	0.00252428	0.0991914	0.0433499	0.00222101	0.0217636	0.0500394	0.0925387	0.148936	0.0502194	0.0299877	3.31572e-05	0.00783266	0.118301	0.0298121
GSM990550	82	0.00100244	0.145181	0.00953106	0.0247736	0.0134831	0.021048	0.146884	0.120355	0.0030214	0.0338948	0.0156092	0.00770391	0.230462	0.0135788	0.180175	0.14795	0.0242935	0.192311	0.0417658	0.0173686	0.0643123	0.00645066	2.87024e-05	0.0154236	0.00981867	0.173274	0.0355678	0.00997746	0.0271071	0.0218884	0.0019351	0.0790756	0.205996	0.228139	0.00515916	0.0958484	0.0257355	0.00812058	0.063712	0.0521993	0.0726804	0.145272	0.0740042	0.0572835	0.000854555	0.00385444	0.0920924	0.0179313
GSM990556	82	0.00355472	0.0548498	0.0196111	0.0684504	0.0149306	0.0235001	0.011799	0.027019	0.00440393	3.74899e-05	0.00445746	0.00121439	0.106894	0.0234695	0.139443	0.0599659	0.0289874	0.0683081	0.0313305	0.0115863	0.0529133	0.0112195	0.0370086	0.0136243	0.0107583	0.059847	0.0295841	0.00499041	0.00850575	0.0172862	0.015877	0.0258576	0.030077	0.0834474	0.00613166	0.0410567	0.00761715	0.00386191	0.0313836	0.0497212	0.0705256	0.133683	0.0136783	0.0180635	0.00424334	0.00725567	0.0528273	0.0310252
GSM990580	82	0.00756818	0.220922	0.0165798	0.135261	0.0141224	0.0389913	0.12062	0.158079	0.00300695	0.0731967	0.187085	0.00575777	0.254393	0.0204197	0.20384	0.124256	0.0334952	0.326803	0.0776261	0.0420616	0.10177	0.00396633	0.0185567	0.0523422	0.00825584	0.262237	0.0599957	0.0109523	0.0397819	0.0112545	0.00750562	0.12399	0.300981	0.257575	0.0161133	0.209254	0.136431	1.81282e-05	0.182416	0.0518335	0.0736354	0.220264	0.157881	0.112806	1.81282e-05	0.00483765	0.151179	0.0101147
GSM990598	82	0.0132763	0.123278	4.17118e-05	0.011014	0.0197386	0.0228088	0.0802728	0.137128	4.17118e-05	0.0281507	0.0494549	0.00744344	0.212824	0.0170009	0.195683	0.108838	0.018691	0.0943011	0.0520454	0.0358622	0.0251864	0.00690638	0.000147373	0.00941256	0.00961492	0.139502	0.0487428	0.0101086	0.030964	0.0119355	0.00658739	0.0405266	0.183885	0.256159	4.17118e-05	0.0884168	0.0471384	0.00359893	0.0553278	0.0508382	0.0897654	0.139286	0.0665775	0.04776	0.00352518	0.0105274	0.0908323	0.0242375
GSM989969	81	0.00274934	0.110801	0.00491898	0.0160371	0.017994	0.0276843	0.0640722	0.0638963	0.0169955	0.0121172	0.039118	0.00601225	0.129392	0.0151148	0.13555	0.087471	0.0236978	0.186418	0.0405299	0.0272566	0.0557139	0.0152263	0.00805799	0.0162009	0.00691097	0.0895304	0.0445982	0.0142034	0.0238154	0.0397435	0.0130119	0.0329001	0.107223	0.195649	0.0271936	0.0703644	0.0180114	0.00725737	0.0391757	0.035586	0.0644167	0.135178	0.0645889	0.0339345	0.00191317	0.00895197	0.0860883	0.0403109
GSM990039	81	0.0122776	0.159219	0.0338001	0.0159464	0.0158846	0.0154588	0.0692718	0.143077	0.0148453	0.0377448	0.0225223	0.0075843	0.16246	0.0168774	0.168023	0.0787126	0.0378476	0.199976	0.0248302	0.0256064	0.110957	0.00456497	0.322577	0.014246	0.0149206	0.136975	0.301253	0.0237999	0.0392994	0.0272128	0.0147962	0.0476429	0.19256	0.305488	0.0717981	0.112717	0.098023	3.56357e-05	0.0519421	0.0551729	0.0736463	0.261174	0.106575	0.0406116	0.013606	0.0135052	0.0770674	0.0153776
GSM990049	81	0.0123075	0.125461	0.011408	0.0135403	0.0152008	0.0253852	0.0421023	0.0846892	0.00462438	0.0125066	0.0268348	0.0145639	0.23429	0.0143029	0.175508	0.0522935	0.0359919	0.102012	0.0307917	0.0121816	0.0607533	0.0122826	0.00478704	0.0103051	0.0150484	0.104882	0.0423869	0.013677	0.023928	0.0174875	0.0213829	0.0392554	0.119712	0.191644	0.00347854	0.0551345	0.0194306	0.00489928	0.0572673	0.0432147	0.0724027	0.147466	0.0301779	0.0220194	0.00942387	0.0133996	0.0631911	0.0229388
GSM990423	81	3.55334e-05	0.414294	0.0117345	0.0473204	0.0186259	0.0269813	0.346439	0.239528	3.55334e-05	0.0759821	0.0213121	0.00211364	0.439687	0.00693432	0.320893	0.214905	0.00357112	0.212603	0.143725	0.182164	0.231105	0.0186263	3.55334e-05	0.0142157	0.00773934	0.585377	0.0728791	3.55334e-05	0.0345838	0.00751588	0.0134834	0.152537	0.38971	0.181627	0.0106967	0.416	0.0757007	3.55334e-05	0.0787934	0.030917	0.0314843	0.330456	0.177911	0.227574	3.55334e-05	0.0155266	0.177126	3.55334e-05
GSM990454	81	0.00375141	0.0991173	0.00658366	0.00985404	0.00549467	0.00847111	0.0599208	0.039565	0.00537768	0.00527242	0.0299452	0.00773145	0.117297	0.0157848	0.124857	0.0172575	0.0303876	0.126301	0.0307405	0.0230154	0.0380741	0.00151973	2.98211e-05	2.98211e-05	0.00876292	0.0721998	0.0315377	0.00966522	0.0124705	0.011592	0.031663	0.0258754	0.1173	0.105532	2.98211e-05	0.0664345	0.0261319	2.98211e-05	0.0102849	0.0438148	0.0832171	0.148881	0.0474448	0.0232457	2.98211e-05	0.00659937	0.071032	0.0166062
GSM990565	81	0.0122105	0.0914782	0.000482934	0.00901634	0.0240394	0.0297046	0.017095	0.0403789	0.00394151	0.0117099	0.0554574	0.0122357	0.209905	0.0200315	0.114837	0.0515743	0.0290377	0.189872	0.0399481	0.0232596	0.0847703	3.75576e-05	0.000560742	0.0149986	0.0080424	0.0509611	0.0414512	0.0160523	0.0136673	0.0220621	0.0168124	0.0094626	0.0638736	0.265573	0.0308494	0.20352	0.0036255	0.00773144	0.0841567	0.0496482	0.0850018	0.087295	0.227707	0.0441764	0.00322001	0.00403007	0.0621169	0.0374497
GSM989844	80	0.0080037	0.0589578	0.00906153	0.00521211	0.028474	0.0191854	0.0161799	0.0232331	0.00795629	0.0164642	0.0189041	2.68511e-05	0.0838393	0.0162499	0.229596	0.0615886	0.0232297	0.0557314	0.0157469	2.68511e-05	0.0396104	0.0163389	0.00871794	0.00473607	0.0085135	0.034647	0.0341357	0.00212267	0.0102288	0.0227787	0.0114113	0.0169559	0.0460537	0.093824	0.0164489	0.0428294	0.0174009	0.00222439	0.0128613	0.0346567	0.0856699	0.132433	0.0251386	0.0119469	0.00122358	0.0110372	0.0707757	0.031452
GSM989951	80	0.0153232	0.0866735	0.00872878	2.87725e-05	0.0201383	0.0222177	0.0286008	0.0570338	0.0059486	0.0122002	0.0491705	2.87725e-05	0.0896002	0.0171853	0.145934	0.0724623	0.0381195	0.0648909	0.0442941	0.00845076	0.0330643	0.0144421	0.00133275	0.0142126	0.0166336	0.0740678	0.0388017	0.0146576	0.0215532	0.0277926	0.013645	0.0356927	0.0925876	0.195296	0.0122834	0.0568858	0.00689835	0.00406246	0.0279147	0.0395123	0.071223	0.14414	0.033575	0.019341	0.00203428	0.00726808	0.063678	0.0332137
GSM990000	80	0.00683324	0.0809453	0.0115907	0.000273269	0.0128784	0.0234821	0.0408868	0.096741	0.00508053	0.00958402	0.0287435	3.25217e-05	0.100627	0.0182221	0.199553	0.0662245	0.0315632	0.0396951	0.0295706	0.00811008	0.0500304	0.00513797	0.00125435	0.00125293	0.00344766	0.261122	0.0913675	0.0226007	0.0187308	0.0237068	0.00595473	0.0284845	0.112316	0.147311	0.00921969	0.0547619	0.00840805	0.00201197	0.01586	0.0516397	0.075845	0.126918	0.0756764	0.00847824	3.25217e-05	0.00687989	0.0765118	0.0184374
GSM990006	80	0.0144354	0.129689	0.0125372	0.0119846	0.0107892	0.0217834	0.0423446	0.138582	0.00432359	0.0277212	0.0200392	3.80339e-05	0.153201	0.0177384	0.211136	0.087735	0.0375853	0.165191	0.0446852	0.0413949	0.0805477	0.00527692	3.80339e-05	0.00579545	0.00611791	0.11674	0.0406705	0.018095	0.0341706	0.0214717	0.0174091	0.0412293	0.173911	0.268369	0.0152251	0.0880027	0.030136	3.80339e-05	0.038104	0.0479959	0.0723693	0.14932	0.0504762	0.0638594	0.00926138	0.0116797	0.0847824	0.00755854
GSM990018	80	0.0148203	0.125712	4.44311e-05	0.00990277	0.0131479	0.0200441	0.0417033	0.0709239	4.44311e-05	0.00775165	0.026503	0.00399655	0.128305	0.0171033	0.181364	0.0879191	0.0534217	0.118139	0.0358144	0.0200125	0.0672572	0.00609685	0.0192745	0.00728042	0.0155656	0.0933036	0.0430836	0.0139854	0.0129734	0.0178471	0.00876419	0.0249833	0.109568	0.207511	4.44311e-05	0.0615698	0.0288967	4.44311e-05	0.0213344	0.0584205	0.0789918	0.156295	0.0514676	0.0314999	0.0015004	0.0124672	0.0710572	0.021071
GSM990036	80	0.00298226	0.164897	0.00113837	0.00525271	0.00595242	0.0163344	0.0301899	0.0549928	0.00346616	0.00909365	0.0286364	0.00587232	0.102696	0.00697707	0.205936	0.0798078	0.0291986	0.137932	0.0182862	0.00809497	0.0642962	4.03459e-05	0.0089879	0.00859552	0.00437227	0.141879	0.0545887	0.0064371	0.0189882	0.0205829	0.00975301	0.0263433	0.174082	0.272383	0.0034629	0.110004	0.0553749	0.0024031	0.0437577	0.0375207	0.06392	0.125347	0.0998812	0.0334697	0.0015219	0.00599183	0.0659801	0.016128
GSM990397	80	0.00868841	0.106038	0.00841461	0.03823	0.00214631	0.0250856	0.0502759	0.097784	0.000631737	0.0211558	0.0240511	0.00138822	0.156696	0.0251921	0.0775679	0.152552	0.0230968	0.187327	0.0371511	0.0177166	0.0393161	4.75319e-05	0.0254283	0.00996384	0.0164535	0.144369	0.055579	0.011542	0.0236093	0.0209003	0.0328157	0.0494292	0.191788	0.209316	0.00409856	0.124546	0.0807494	0.00279783	0.000351226	0.0313046	0.090715	0.14642	0.0964866	0.0430145	0.00310046	0.00820219	0.0908637	0.00648594
GSM990470	80	0.0048636	0.0855752	0.00890135	2.6809e-05	0.00989063	0.015349	0.134845	0.0505218	0.00271915	0.0171032	0.0118273	0.00671283	0.128723	0.0182008	0.163845	0.0771539	0.0251742	0.153859	0.0153497	0.0234857	0.0278119	0.00252452	0.00434265	0.00983047	0.00282877	0.0880653	0.023495	0.00808931	0.0145852	0.0159458	0.0158904	0.0450464	0.10241	0.111335	0.0229655	0.075862	0.00639923	0.00631062	0.0212782	0.0433253	0.0553517	0.144162	0.126624	0.0169731	0.00436694	0.0111448	0.0905197	0.0200595
GSM990553	80	0.0146151	0.145126	0.0257737	0.0129966	0.0273862	0.0324606	0.0384883	0.0704195	0.0112613	0.0394292	0.0480652	0.00971919	0.167502	0.0242037	0.148921	0.12577	0.0303828	0.166313	0.0448427	0.0209427	0.0770229	0.0050788	0.0916193	0.0336071	0.0119796	0.0955663	0.0817643	0.0157295	0.0323976	0.0278196	0.0173557	0.0361448	0.207261	0.177925	0.0203089	0.102979	0.0350221	0.00788933	0.042169	0.059699	0.091027	0.142242	0.0639513	0.0399924	0.00365189	0.0111101	0.108363	0.0300658
GSM990583	80	0.00307205	0.179494	2.87497e-05	0.0141671	0.0111557	0.0181057	0.040418	0.129497	2.87497e-05	0.0302137	0.0329486	2.87497e-05	0.218455	0.0139463	0.160837	0.162383	0.0385571	0.222368	0.0370976	0.0385733	0.0909787	0.000415036	0.0774766	0.0223879	0.0120624	0.105319	0.100136	0.00242108	0.0179213	0.0210349	0.00878068	0.0700176	0.203384	0.204418	0.0355337	0.118125	0.0344363	0.00145619	0.0689393	0.053576	0.0753484	0.131879	0.143471	0.0478287	0.000695108	0.00904714	0.100605	0.0221952
GSM989847	79	0.0082694	0.324796	0.00512885	0.0544145	0.0252285	0.0304455	0.185655	0.194115	0.00736363	0.048486	0.0413434	0.0151154	0.348812	0.0192769	0.170648	0.0697845	0.0460968	0.269455	0.105072	0.183578	0.152917	0.017411	0.0199565	0.0276001	0.0105716	0.271827	0.0822698	0.0173714	0.0530558	0.0234834	0.0205855	0.0980178	0.322574	0.196697	0.0361996	0.287799	0.0806897	0.000469253	0.109879	0.0594206	0.0718568	0.215578	0.15273	0.214222	0.00714744	0.0287059	0.150116	0.059049
GSM989857	79	0.00799246	0.134206	0.00870095	0.00937709	0.0359429	0.0235116	0.0469411	0.106816	0.00769682	0.0400994	0.0416137	0.00475027	0.135303	0.02798	0.0818969	0.0799885	0.0415174	0.176111	0.0475132	0.0222855	0.0427526	0.0117981	0.00219823	0.0144885	0.00892788	0.152884	0.0385218	0.0225775	0.0180296	0.0315899	0.0101808	0.0514945	0.201396	0.217311	0.00659964	0.0714338	0.0306725	0.00128978	0.0669676	0.0707206	0.0930469	0.132218	0.0892387	0.082288	0.00618536	0.0141492	0.155144	0.0427103
GSM989861	79	0.0124475	0.0524013	0.010013	0.0055826	0.0218133	0.0180505	0.0140515	0.0423393	0.00412532	0.00735387	0.019489	3.88908e-05	0.0974592	0.0212931	0.152199	0.058979	0.0330641	0.0435237	0.0309482	0.00459149	0.0289121	0.00820675	0.0064493	0.0106873	0.00432285	0.061032	0.0254585	0.0157883	0.0120464	0.0233112	0.0146614	0.0181674	0.0858479	0.308443	0.00190895	0.0687888	0.0148706	0.00343546	0.0368351	0.061907	0.067891	0.162982	0.0366052	0.0204964	0.0109159	0.010418	0.0717973	0.0295589
GSM989864	79	0.00138885	0.113791	0.00748604	0.00648653	0.0227829	0.0227607	0.0179728	0.0715023	0.013831	0.0120302	0.020104	0.00631123	0.113181	0.0193967	0.149749	0.0786895	0.0245057	0.0563487	0.0340287	0.0130881	0.0431608	0.0152235	0.0143926	0.0160393	0.0071189	0.0737421	0.0335543	0.018419	0.0173883	0.024198	0.00923414	0.0245034	0.127303	0.172694	0.0134099	0.0590897	0.0183195	0.0013865	0.0499737	0.0460767	0.0681783	0.150388	0.0380812	0.0382262	0.00333565	0.0161196	0.0950303	0.0405689
GSM989893	79	0.000961329	0.108488	0.00674684	0.00643258	0.0348542	0.0275502	0.0351888	0.0492308	0.0156455	4.05003e-05	0.0362876	0.00250201	0.145659	0.0199156	0.110064	0.0626162	0.0400539	0.124532	0.0388854	0.0179178	0.0526581	0.00951591	4.05003e-05	0.0171147	0.0104581	0.0825129	0.0328361	0.0145307	0.0152183	0.0270743	0.00441062	0.0287527	0.0974378	0.16099	0.015362	0.0674219	0.0454037	0.00297602	0.0340765	0.057526	0.0687511	0.144341	0.0400908	0.0356678	0.00342816	0.0192537	0.096324	0.0379221
GSM989898	79	0.01271	0.150687	0.00519001	0.0459591	0.0142828	0.0204882	0.0739379	0.106637	0.00514321	0.0463112	0.0451278	0.0122284	0.184561	0.0179007	0.152042	0.0610378	0.0300434	0.140106	0.0795557	0.0130817	0.0630991	0.0118345	0.00076273	0.0307965	0.00918448	0.101559	0.050289	0.0243768	0.0212272	0.0274549	0.0175584	0.0517769	0.16306	0.204365	0.0238615	0.119232	0.052092	0.00308867	0.0371857	0.0550668	0.072636	0.147781	0.0844598	0.0792373	0.00675189	0.0186272	0.113422	0.0463368
GSM989901	79	0.0079186	0.0434108	0.00729549	0.00260524	0.017389	0.0140918	0.0115555	0.0181219	3.28199e-05	0.00223201	0.00498415	3.28199e-05	0.0753025	0.0111916	0.127578	0.0466308	0.0442728	0.027485	0.0132971	0.00782544	0.0461271	0.00934388	0.00507746	0.0104023	0.0136377	0.0320398	0.0257441	0.0205506	0.0107217	0.0257919	0.0207715	0.0145219	0.0192563	0.0867152	0.0121562	0.0243866	0.0161948	0.0018375	0.0199153	0.0415567	0.056134	0.132067	0.0102386	0.0127759	3.28199e-05	0.00743779	0.0393708	0.0331535
GSM990028	79	0.00360879	0.0684571	0.00667404	0.00730746	0.00989631	0.0241364	0.0202443	0.0535356	0.00410363	0.0102458	0.0145008	0.0101122	0.109527	0.0188445	0.114627	0.0547585	0.0382612	0.108176	0.0396534	0.0171545	0.0543361	0.00404129	4.84161e-05	0.00766638	0.00392624	0.10285	0.0393777	0.00982633	0.0430715	0.0188711	0.0225508	0.0282261	0.122532	0.194748	4.84161e-05	0.0926938	0.0212862	4.84161e-05	0.0407497	0.048008	0.0796915	0.153778	0.0893728	0.0457569	0.00312534	0.00875712	0.0864938	0.0163489
GSM990410	79	0.0121672	0.0579939	0.00199774	0.00962914	0.0139228	0.0279776	0.00632463	0.0844674	0.00138744	4.20265e-05	0.0232725	0.00796306	0.118591	0.023833	0.106335	0.0459139	0.0219231	0.0680127	0.0165415	4.20265e-05	0.0232032	0.0046897	0.0503214	0.00754413	0.00507773	0.069407	0.0183612	0.012114	0.0108745	0.0218915	0.0152963	0.0204394	0.0962786	0.117347	0.00739993	0.048107	0.0190458	0.00546548	0.0116673	0.0548201	0.0670977	0.132152	0.0264638	0.0151992	4.20265e-05	0.0146019	0.0609817	0.0250467
GSM990429	79	0.00471356	0.113861	0.000614039	4.76128e-05	0.00871737	0.0170508	0.0938637	0.167266	4.76128e-05	0.00876301	0.0213925	0.00837964	0.118958	0.0264623	0.0904669	0.0824215	0.0107437	0.0991553	0.0334397	0.0331217	0.0638292	4.76128e-05	0.00835052	0.00718843	4.76128e-05	0.132512	0.0842514	0.0187648	0.0250733	0.0056272	0.0129096	0.0433871	0.192079	0.268613	0.0232798	0.173652	0.0318718	4.76128e-05	0.041424	0.0375303	0.0827194	0.155804	0.0773228	0.0515305	4.76128e-05	0.010089	0.102743	0.0104083
GSM990432	79	0.00889048	0.198163	0.0116226	0.0183858	0.00224023	0.0112554	0.22197	0.168304	3.57114e-05	0.0215012	0.0332042	0.00519041	0.19851	0.0287463	0.213456	0.101072	0.0178162	0.294012	0.0998232	0.0431941	0.0620161	0.00616165	0.00533964	0.0610706	0.0111623	0.221066	0.0649345	0.00540556	0.0235418	0.0242722	0.0153862	0.0868804	0.234957	0.243642	0.0356256	0.168331	0.0548841	0.00416954	0.0460425	0.0532188	0.0942149	0.198852	0.149811	0.0708633	0.002077	0.0124568	0.106903	3.57114e-05
GSM990456	79	0.0105185	0.0501246	0.00795912	0.0175773	0.008669	0.0391122	0.00427697	0.0343194	0.00977724	0.00826062	0.0351692	0.0064543	0.064345	0.0315808	0.105483	0.0113153	0.0169807	0.0686717	0.0332348	0.00737145	0.00993426	0.00596071	0.00869847	0.00267339	0.00449719	0.0443279	0.0415133	0.00471457	0.0172241	0.0213651	0.0104413	0.00552712	0.0535021	0.0265055	0.00448482	0.0305233	0.033433	0.00476622	0.0201984	0.0438154	0.117804	0.166473	0.0644279	0.024807	0.00760079	0.0137377	0.0730777	0.0266616
GSM990469	79	0.00822119	0.0723544	0.00527336	0.00899779	0.0162187	0.0200719	0.018326	0.0604225	0.00704709	0.00970298	0.00955995	0.00206241	0.0962047	0.0121254	0.10082	0.0242639	0.0169573	0.145477	0.0257415	0.0230145	0.0373829	0.00423261	0.0521339	0.00799487	0.00683101	0.0404672	0.0239528	0.0103441	0.0121161	0.0140598	0.0143213	0.0201871	0.119449	0.107138	0.0252587	0.0503045	0.011663	0.000583548	0.020709	0.0251111	0.07744	0.129436	0.0277779	0.0125754	0.00274697	0.00819345	0.0608559	0.01003
GSM990493	79	0.0030274	0.199183	0.0108278	0.0464793	0.00570775	0.0218847	0.0326913	0.106527	0.00824885	0.0102578	0.0375944	0.00663538	0.173009	0.0363177	0.189044	0.117831	0.0340169	0.178461	0.0451933	0.0136285	0.046027	0.00973953	0.00027677	0.01748	0.0064253	0.140519	0.0463726	0.0169301	0.0296224	0.0382399	0.0146758	0.0435266	0.168068	0.215395	4.90019e-05	0.122261	0.0491	0.00147444	0.0631172	0.0381112	0.0779567	0.175308	0.0936412	0.0545736	0.010757	0.0143731	0.0980845	0.0190779
GSM990554	79	0.00509764	0.187456	0.0174294	0.0412134	0.0157292	0.0337397	0.0949402	0.123202	0.00659951	0.0110387	0.0334421	0.00245023	0.182855	0.0189591	0.176431	0.0849419	0.0300529	0.168907	0.0946268	0.0477516	0.0443553	0.0116468	0.0509302	0.0200268	0.0150317	0.142796	0.0787934	0.0151887	0.0424938	0.0283715	0.0133026	0.0445638	0.20059	0.189651	0.0229698	0.141854	0.106688	0.00410212	0.032874	0.0586401	0.075461	0.148776	0.137853	0.0538185	0.0102033	0.0143979	0.111082	0.0298856
GSM990619	79	0.0137905	0.0864231	0.00583801	0.00810192	0.018362	0.0368692	0.0253302	0.0297015	3.25463e-05	0.0138136	0.0439012	3.25463e-05	0.139991	0.0336477	0.158151	0.040317	0.0356583	0.0344015	0.0459194	0.0218275	0.0420982	0.00301121	0.000791875	0.0186797	0.00652638	0.0428011	0.0362262	0.0139672	0.0219516	0.0468969	0.0217942	0.0182782	0.083969	0.148139	0.00589472	0.0472481	0.0132007	3.25463e-05	0.0169736	0.0512259	0.0972357	0.131685	0.0269301	0.020325	0.00027712	0.01881	0.0839179	0.00893727
GSM989875	78	0.0118172	0.183254	0.0135558	0.0970398	0.0268108	0.0202437	0.0757567	0.141765	0.00819553	0.00561364	0.0650715	0.00270156	0.179633	0.0117743	0.165082	0.058359	0.0298981	0.213752	0.0970706	0.037839	0.0856108	0.0186923	0.0179245	0.0227215	0.00991755	0.182008	0.0942362	0.0158668	0.037058	0.0183189	0.0157784	0.0327972	0.208049	0.299024	0.0159354	0.113948	0.0762327	0.00333219	0.0230977	0.0348544	0.0771106	0.182161	0.0762167	0.0527708	0.00338034	0.0138285	0.131107	0.0326086
GSM989907	78	0.00595221	0.0711146	0.00809926	0.00715905	0.020123	0.0213698	0.0440466	0.0844631	0.00456029	0.0268485	0.0395221	0.00622836	0.0843839	0.0199307	0.175664	0.0666373	0.0381304	0.047373	0.0264644	0.00564552	0.0377415	0.0212106	0.00230151	0.0197612	0.00512533	0.0739278	0.0519601	0.0092628	0.00746182	0.0218472	0.0128288	0.0233333	0.125722	0.162893	0.0267453	0.099976	0.0344901	0.00884691	0.0333765	0.0414361	0.069578	0.15851	0.0542615	0.0248589	0.0057762	0.0152903	0.0730256	0.0490559
GSM989933	78	0.00756674	0.194429	3.47493e-05	0.014953	0.0205634	0.00579065	0.141457	0.118335	0.00872843	0.0113507	0.0390393	3.47493e-05	0.175379	0.0178142	0.26707	0.135015	0.0378904	0.196936	0.0636695	0.0770186	0.0871361	0.00829462	0.0230316	0.0159167	0.0037177	0.156003	0.0710147	0.00940361	0.0304291	0.0196279	0.0179745	0.0683779	0.260381	0.249155	0.0273467	0.144343	0.0454767	3.47493e-05	0.0580211	0.0573738	0.0685836	0.165049	0.114861	0.0691731	3.47493e-05	0.0144835	0.11684	0.0391564
GSM989934	78	0.00530537	0.0830177	0.00066145	0.00741813	0.0318452	0.0227288	0.0146109	0.0398355	0.00148781	2.99309e-05	0.0209514	0.0101949	0.0836023	0.0193847	0.178874	0.0718518	0.028986	0.0524055	0.0167357	0.0128454	0.143619	0.0099465	0.000812746	0.00275454	0.00560882	0.0637063	0.0372454	0.0177548	0.0141225	0.0189063	0.0309025	0.0145246	0.0695096	0.0590693	2.99309e-05	0.0580913	0.0168018	2.99309e-05	0.0264526	0.0592458	0.0804603	0.144221	0.0334471	0.0361424	2.99309e-05	0.0161462	0.0890703	0.0276758
GSM990022	78	0.00375588	0.15943	0.00326797	0.00504998	0.0105932	0.0240009	0.0359378	0.0996298	0.00478677	0.0152762	0.0352679	0.00747307	0.174908	0.02086	0.134725	0.0580695	0.0378452	0.0940361	0.0474399	0.0427868	0.0804122	0.00570371	0.0259795	0.00244956	0.00980629	0.139162	0.0429915	0.00963878	0.044277	0.0148963	0.00976632	0.0830455	0.192207	0.28967	5.28989e-05	0.112741	0.0621813	0.00584489	0.0534765	0.0513322	0.0657795	0.161864	0.0417816	0.0689437	0.00344931	0.0121049	0.0921725	0.0348825
GSM990412	78	0.00408234	0.12735	0.0204812	0.00212641	0.01582	0.0206665	0.0175511	0.0559248	4.27119e-05	0.0112236	0.0121378	0.0119265	0.124585	0.0121564	0.19931	0.0646086	0.0164065	0.0863127	0.0270422	0.0138034	0.0281375	0.00310545	0.0129658	0.0035889	0.00631648	0.130351	0.0612552	0.0131413	0.00716904	0.0136454	0.0187702	0.0263277	0.090901	0.0337359	0.00313114	0.0562131	0.0275983	4.27119e-05	0.0221776	0.041545	0.0904062	0.15085	0.0156406	0.0189753	0.0038391	4.27119e-05	0.0687676	0.0222255
GSM990445	78	2.5874e-05	0.150175	0.00136235	0.00351292	2.5874e-05	0.0250887	0.0535315	0.109097	0.00092388	2.5874e-05	0.0241716	0.00451499	0.186532	0.0115018	0.135437	0.0279221	0.0314186	0.122728	0.0355737	0.0253334	0.0526992	2.5874e-05	0.0518319	0.00108453	0.00439169	0.138563	0.0371892	0.0147423	0.0271568	0.0203594	0.00550619	0.0239706	0.158029	0.203917	0.013617	0.100335	0.0159883	2.5874e-05	0.0148598	0.047265	0.0758237	0.128203	0.0359175	0.0333256	0.00367069	0.00424467	0.0933476	0.00157793
GSM990460	78	0.00942555	0.199938	0.00284643	0.0857954	0.00851035	0.0254617	0.154034	0.114992	0.00437306	0.0762435	0.0303527	0.00323136	0.214678	0.0210871	0.178254	0.138443	0.0254468	0.249795	0.0855154	0.0487697	0.0687023	0.00136476	2.71776e-05	0.0850348	0.0038942	0.175302	0.0413306	0.0126499	0.0452843	0.00393443	0.00392343	0.0697905	0.245409	0.253362	0.00210425	0.140943	0.113227	0.00737707	0.0441305	0.0323679	0.0543777	0.16028	0.235468	0.124184	2.71776e-05	0.0146327	0.144642	0.0188223
GSM990495	78	0.00353518	0.133779	0.00533143	0.026928	0.0173172	0.0158226	0.0611035	0.136915	4.75806e-05	0.0052542	0.0671798	0.000596941	0.141407	0.0277149	0.143788	0.0886367	0.0185344	0.129194	0.0487234	0.0203331	0.0442353	0.00550733	0.0188219	0.00972069	0.0118226	0.12807	0.029695	0.0186089	0.0113598	0.0277704	0.0158613	0.0311919	0.159736	0.218917	0.00722134	0.0789812	0.0272745	4.75806e-05	0.0290282	0.0362263	0.079694	0.178755	0.0592192	0.0444468	0.00108119	0.00706973	0.0903951	0.0119189
GSM990589	78	0.00544313	0.0939732	3.01969e-05	0.0011877	0.0296781	0.0252914	0.0153922	0.0720402	0.0216743	0.0134073	0.0222702	0.00310084	0.132748	0.0175871	0.133479	0.0717003	0.0256309	0.0818854	0.0316869	0.0278285	0.0738419	0.0086847	0.0176852	0.0191612	0.0120573	0.0853572	0.0348537	0.010609	0.0186748	0.0160245	0.0213543	0.0343807	0.195242	0.152866	0.00240894	0.101084	0.0362168	0.0039039	0.0372983	0.0561941	0.0840329	0.133589	0.0443608	0.0231654	0.000634106	3.01969e-05	0.0987344	0.020139
GSM990616	78	0.0017235	0.0733958	0.00475046	0.00615404	0.015107	0.0342735	1.2934e-05	0.0580203	1.2934e-05	0.00520608	0.0175039	1.2934e-05	0.169164	0.0110403	0.15424	0.0342226	0.0313513	0.0716002	0.0138639	0.00647206	0.0359519	0.00134956	0.00102921	0.000243375	0.0163444	0.110752	0.0254842	0.0138872	0.0246487	0.018218	0.00277319	0.0345942	0.118569	0.170925	1.2934e-05	0.0577498	0.0373439	1.2934e-05	0.0195781	0.0476481	0.0831471	0.127272	0.0398972	0.0181617	1.2934e-05	0.00420422	0.0743691	1.2934e-05
GSM990623	78	0.00621277	0.0647691	4.11733e-05	0.00510677	0.0215409	0.0198526	0.0189273	0.085551	0.00943923	0.00961251	0.0183039	0.00264407	0.124743	0.0179447	0.155735	0.0483776	0.0356167	0.0585366	0.0329127	0.00539699	0.0527988	0.00433535	0.0322469	0.00464384	0.00595733	0.0929414	0.036152	0.0131246	0.0174181	0.0113058	0.0102951	0.0225294	0.109473	0.193706	4.11733e-05	0.0513078	0.0255147	0.00676099	0.0198666	0.0490816	0.0832377	0.155171	0.0331533	0.0358521	0.0035518	0.00643113	0.0838947	0.0150891
GSM989839	77	0.0153483	0.190773	0.00824169	0.0273965	0.0259484	0.0346894	0.0650827	0.12214	5.39903e-05	0.019499	0.0327218	0.0159446	0.217384	0.0231519	0.175404	0.141709	0.0396328	0.198628	0.0849931	0.0493256	0.0871397	0.0184187	0.0328886	0.0224524	0.0162247	0.165156	0.0737066	0.0118606	0.0430166	0.0281636	0.0153582	0.0817932	0.22232	0.25242	0.0213232	0.172413	0.100884	0.00495385	0.0606526	0.0570437	0.0958402	0.17748	0.117217	0.0843782	0.00977637	0.018267	0.1644	0.0488038
GSM989869	77	0.00907699	0.086599	0.0130299	0.0104677	0.0186122	0.0252016	0.0316524	0.0607275	0.00126072	0.0127002	0.0142861	0.00861351	0.12439	0.0143551	0.181005	0.093381	0.033007	0.0545373	0.0214337	0.0183795	0.0300746	0.0129282	0.00562191	0.0136438	0.0101212	0.0510104	0.0421745	0.0222297	0.0172607	0.0169617	0.00720884	0.0225053	0.0814618	0.10948	0.0163419	0.0645546	0.022971	0.00118067	0.0396338	0.025151	0.0758744	0.151708	0.0285164	0.01154	0.003521	0.0066929	0.0704627	0.043177
GSM990003	77	0.016738	0.0961858	5.23632e-05	0.0061762	0.0156247	0.0274562	0.0386366	0.0510271	0.00677507	0.00834823	0.0236423	0.00538515	0.141668	0.0209665	0.1293	0.0599398	0.0442963	0.0346279	0.0328442	0.00790817	0.0759588	0.0152264	0.0385224	0.0050298	0.018228	0.0956934	0.0439279	0.0231438	0.0237304	0.0321991	0.00775464	0.0360356	0.0981093	0.177967	0.00934113	0.0427335	0.0150449	5.23632e-05	0.0222752	0.0579805	0.0827583	0.157439	0.0450171	0.0256836	0.0029398	0.0145426	0.0758847	0.00897411
GSM990017	77	0.0155192	0.162264	0.0145161	0.0163753	0.0124398	0.0296414	0.0518892	0.106408	0.0139074	0.0425401	0.0322451	0.0077392	0.1411	0.00591521	0.148251	0.0919717	0.0299628	0.176951	0.0413594	0.0269485	0.0469449	0.00866018	0.0255914	0.0139935	0.0115087	0.154968	0.0660916	0.0185109	0.0268506	0.0145757	0.0156858	0.0234011	0.17771	0.226426	0.00999397	0.0894749	0.0734665	3.46093e-05	0.0258835	0.0474545	0.0702785	0.175982	0.103522	0.0511067	3.46093e-05	0.0169375	0.106976	0.0266161
GSM990038	77	0.00403709	0.237624	0.0252552	0.0783121	0.0196122	0.0321549	0.232583	0.203144	0.00698515	0.0568523	0.0500711	0.017738	0.254985	0.0164314	0.233161	0.0929817	0.0418502	0.261804	0.118936	0.0566089	0.112778	0.00907727	0.000979958	0.0252662	0.0215974	0.28123	0.0776749	0.0107368	0.0444232	0.0280822	0.0196324	0.110496	0.290309	0.362116	0.0414178	0.22478	0.166524	0.00557345	0.118745	0.0385536	0.0683459	0.304444	0.259877	0.114261	0.0111603	0.0102741	0.15177	0.0208898
GSM990054	77	0.0113067	0.105586	0.0140838	0.0271124	0.0229561	0.0238368	0.0258316	0.109601	0.00109301	0.0185643	0.0100026	0.013344	0.130711	0.0217622	0.186994	0.0599927	0.0312664	0.125903	0.0463856	0.0153402	0.0739642	0.0113114	0.00155234	0.0112414	0.00709978	0.119854	0.046657	0.00937556	0.0160188	0.0187175	0.019074	0.0448663	0.136425	0.194767	0.0133869	0.0803342	0.0471606	0.000515658	0.043664	0.0699749	0.0722384	0.164583	0.0292836	0.0357188	0.00178562	0.017401	0.0870544	0.0199831
GSM990399	77	0.00650777	0.127924	0.00176572	0.0516695	0.0115336	0.0278969	0.0383108	0.122073	0.00341914	0.00614267	0.0427094	3.71969e-05	0.157109	0.0154638	0.155756	0.119793	0.023168	0.17851	0.0382262	0.0153638	0.0509305	0.00364016	0.0022239	0.0122827	3.71969e-05	0.149935	0.0590206	0.0078009	0.0185785	0.0189112	0.0108623	0.0548018	0.171953	0.158071	0.00653454	0.0653694	0.0168681	0.00472906	0.0273974	0.0583764	0.0757387	0.124463	0.072732	0.0352687	0.00668473	0.0050283	0.0641566	0.0199467
GSM990463	77	0.00647842	0.169828	0.00692346	0.0140959	0.0107216	0.0196546	0.0778052	0.107803	0.0101658	0.0386657	0.0163166	0.00339869	0.19918	0.0168922	0.107668	0.0937438	0.0153893	0.194195	0.079347	0.0250826	0.0598154	2.54763e-05	0.030811	0.0137416	0.0083124	0.139105	0.0439597	0.012337	0.0267645	0.015678	0.0116804	0.0613788	0.206928	0.180936	2.54763e-05	0.142492	0.0506333	0.00150153	0.0272016	0.0300824	0.0621865	0.163425	0.0968293	0.0616906	2.54763e-05	0.0154137	0.114493	0.0137381
GSM990552	77	0.00647862	0.0954139	0.011194	0.019571	0.0226053	0.033024	0.0477937	0.0709416	0.00402378	0.0284117	0.104537	4.48826e-05	0.152275	0.0194287	0.0720953	0.120564	0.0190388	0.0891968	0.0186074	0.00616955	0.0490101	0.0100681	4.48826e-05	0.0168968	0.00807702	0.100405	0.0476528	0.00836809	0.0213762	0.00986254	0.0257901	0.0483751	0.112024	0.0865258	0.0181828	0.0856639	0.00826634	0.0136283	0.0256963	0.0550952	0.0880279	0.14326	0.0345646	0.0447501	4.48826e-05	0.0095909	0.0876196	0.0255279
GSM990586	77	0.00908464	0.0667061	0.00453032	0.0060837	0.0247403	0.0252556	0.0303411	0.0951692	0.00463013	0.0148948	0.0328857	4.69782e-05	0.173813	0.0209814	0.112275	0.12968	0.0246241	0.0802637	0.0585158	0.0143431	0.0371262	0.011347	0.0566392	0.0096131	0.015536	0.0733609	0.038118	0.0122135	0.0232161	0.0150607	0.0177591	0.034679	0.149404	0.165075	0.0271156	0.0898768	0.0240605	0.00201441	0.0608711	0.0553354	0.0773284	0.148829	0.0233292	0.019908	0.00362874	0.0128922	0.0812785	0.0141755
GSM990597	77	0.00739566	0.168703	4.8889e-06	0.00427851	0.0188166	0.0302273	0.0554089	0.134085	0.000517695	0.0277627	0.0211981	0.00666545	0.159138	0.0197247	0.141057	0.111266	0.0345991	0.203169	0.02659	0.0285067	0.0540802	0.0080786	0.015559	0.0195378	0.00302933	0.15458	0.0548587	0.0141087	0.0275431	0.0170152	0.0263803	0.0522367	0.189646	0.263535	0.00415444	0.122654	0.0475144	4.8889e-06	0.031463	0.0449752	0.0914897	0.136992	0.0635244	0.0439775	4.8889e-06	0.00725912	0.10162	0.0165588
GSM990622	77	0.00813191	0.0828972	1.20364e-05	0.00244431	0.0112316	0.0144251	0.0116016	0.0431839	1.20364e-05	1.20364e-05	0.0314066	0.00819388	0.086057	0.0105495	0.153808	0.0500268	0.0164206	0.0606991	0.00887932	0.0071494	0.04219	1.20364e-05	0.00361284	0.00082907	1.20364e-05	0.0696758	0.0306225	0.00393238	0.0173752	0.0171165	0.0146309	0.00514649	0.0434272	0.137806	1.20364e-05	0.0536175	0.0115768	1.20364e-05	0.0181156	0.0383127	0.0646943	0.118001	0.0129849	0.0100082	0.00138595	1.20364e-05	0.065184	0.00590489
GSM989853	76	0.0122	0.167524	0.00741518	0.0204158	0.0181101	0.0274788	0.0904847	0.119071	0.0140163	0.0152464	0.0372488	0.00152658	0.165477	0.0226993	0.188958	0.0883592	0.0434211	0.136083	0.0646662	0.0271745	0.0755265	0.0210348	0.0309876	0.0179209	0.0170052	0.136716	0.0701336	0.0119846	0.0257256	0.0296625	0.0161202	0.064637	0.192435	0.256213	0.00374399	0.130323	0.0581932	0.00333063	0.0601991	0.0672859	0.0818082	0.164772	0.101848	0.0740655	0.00619256	0.0163443	0.114799	0.0414035
GSM989877	76	0.0102201	0.0649499	0.00900084	0.00389558	0.0145703	0.0233373	0.0234196	0.0397002	0.00747524	0.0158715	0.0213565	0.00280434	0.0829527	0.0135114	0.155069	0.0446196	0.0284548	0.0377632	0.0277436	0.00588724	0.0386897	0.0193037	0.00339421	0.0092703	0.013767	0.03986	0.0342309	0.0150962	0.0128244	0.0311409	0.0104055	0.0177003	0.0579392	0.0723349	0.0214891	0.0790444	0.0171397	0.00519844	0.0301819	0.0562136	0.0731935	0.122236	0.0210545	0.026348	0.00322847	0.0145282	0.046811	0.0512076
GSM989884	76	0.00724658	0.114677	0.0124254	0.0098106	0.0229232	0.0258855	0.0712983	0.0554397	0.00468224	0.00255128	0.0211029	0.00706059	0.128886	0.0237867	0.170956	0.0414982	0.029595	0.159497	0.0428355	0.00977938	0.0533728	0.0230227	0.012409	0.0139143	0.00690506	0.179603	0.0802751	0.0108935	0.0256535	0.0196048	0.0317715	0.0648815	0.152771	0.219231	0.00750192	0.072872	0.0398961	0.00480224	0.0423845	0.0427629	0.068509	0.137	0.0557637	0.0290551	0.0113415	0.010643	0.0878532	0.0145701
GSM989913	76	0.0112811	0.129975	0.00487815	0.0173167	0.0201275	0.0175036	0.0303459	0.122441	0.0112716	0.0151293	0.0231163	3.4951e-05	0.129424	0.00907552	0.148695	0.0551052	0.0370111	0.128118	0.0569778	0.0216845	0.0477868	0.0172219	0.00267565	0.0151384	0.0132848	0.0930217	0.0686587	0.0118169	0.02234	0.0170808	0.0131546	0.0561911	0.176372	0.234711	0.00313689	0.0973838	0.0315908	3.4951e-05	0.0451475	0.0498951	0.0687763	0.218364	0.0984203	0.0506533	0.0120863	0.00780862	0.0933953	0.0278325
GSM989922	76	0.00734495	0.178603	0.00324009	0.000981755	0.021421	0.0251794	0.0670604	0.0773027	4.33045e-05	0.00571006	0.027487	0.00396622	0.143016	0.0165109	0.144122	0.0928222	0.0429284	0.129191	0.0247451	0.0285018	0.0422548	0.000408628	0.0109546	0.00223486	0.0132194	0.113364	0.0597715	0.0209254	0.0256612	0.0198128	0.0144362	0.0313175	0.15461	0.184108	0.00895998	0.111924	0.0267802	4.33045e-05	0.0410871	0.063863	0.0788368	0.166503	0.0390727	0.0200945	4.33045e-05	0.00538058	0.097135	0.0228652
GSM989944	76	0.0156996	0.147043	0.00205618	0.00619525	0.0242606	0.0313381	0.0492166	0.104042	0.00809043	0.0159946	0.0222022	0.0155775	0.141545	0.0169275	0.160801	0.101903	0.0415902	0.128578	0.0345309	0.0295733	0.0868243	0.0135339	0.0280124	0.0189296	0.010081	0.0954563	0.0885321	0.0181629	0.0229683	0.0184751	0.00562336	0.0321662	0.149762	0.261455	0.0113544	0.110428	0.0289696	0.00516582	0.0582473	0.0583861	0.10238	0.165269	0.0404695	0.0494256	0.00454125	0.0135101	0.104224	0.0354138
GSM989960	76	0.00520128	0.0820904	0.00351672	0.0084644	0.0141748	0.0227468	0.0356615	0.0691443	4.20074e-05	0.03344	0.052916	0.0113401	0.168456	0.0145687	0.0905807	0.0378407	0.0317835	0.100695	0.0593311	0.014106	0.0714314	0.00327344	0.0182439	0.0102541	0.00769314	0.124608	0.0308677	0.0159037	0.0257992	0.0292609	0.00595294	0.028977	0.172089	0.141147	4.20074e-05	0.047672	0.024019	4.20074e-05	0.0312322	0.0411166	0.0752876	0.135674	0.0579812	0.027057	0.00596107	0.0171471	0.0860733	0.0246393
GSM990021	76	0.00825189	0.123176	0.00912036	0.0754763	0.020197	0.0265411	0.0664785	0.088772	4.62053e-05	0.0361739	0.0504723	0.00785111	0.136064	0.0139652	0.161533	0.0444262	0.0448087	0.123815	0.0587589	0.0194467	0.083859	0.0159234	0.072318	0.00935539	0.00970897	0.14137	0.0719158	0.0169101	0.0241821	0.0134656	0.0165088	0.0503766	0.178462	0.232008	0.00459705	0.0946516	0.0457431	0.0103529	0.0375562	0.0474476	0.0805902	0.166676	0.139214	0.0588169	0.00473078	0.0120935	0.0987822	0.0198
GSM990024	76	0.00815824	0.126003	0.00668018	0.000745397	0.00206601	0.0236882	0.045326	0.0780214	3.78451e-05	0.0101966	0.0120539	3.78451e-05	0.149299	3.78451e-05	0.154075	0.0462208	0.0326478	0.117603	0.034434	0.0247179	0.0607709	0.00124058	0.0217649	0.00586978	0.0098897	0.106631	0.0382625	0.0170526	0.0233666	0.00819142	0.00532087	0.0301427	0.163704	0.206375	0.00432952	0.0935202	0.0336575	3.78451e-05	0.0322871	0.0405414	0.0729277	0.145432	0.0655751	0.0301593	0.00707995	0.0140669	0.0823597	0.0308922
GSM990047	76	0.008661	0.105682	3.63981e-05	0.00559659	0.00673205	0.0157627	0.117088	0.112629	3.63981e-05	3.63981e-05	0.0479493	3.63981e-05	0.171269	0.00990179	0.179148	0.0751844	0.0328981	0.148924	0.0612018	0.0109628	0.0702093	3.63981e-05	0.059863	0.000987061	0.0123586	0.135391	0.0485119	0.00459762	0.024206	0.00918573	0.00695025	0.0371105	0.210147	0.11321	3.63981e-05	0.088018	0.0707012	3.63981e-05	0.0328146	0.0633027	0.0721593	0.16569	0.0576285	0.0314183	3.63981e-05	0.010507	0.0872377	0.00794242
GSM990065	76	0.00709908	0.0944039	0.0136329	0.0143558	0.0119148	0.0187455	0.0116331	0.078733	0.0120078	0.0231863	0.0533976	0.00668168	0.150186	0.025483	0.165417	0.081042	0.0396467	0.0729734	0.035686	0.0184852	0.0454667	0.0202284	0.00989886	0.00838076	0.00127132	0.0534064	0.0480116	0.0186065	0.018155	0.0509732	0.0189042	0.028517	0.110315	0.106614	0.0105226	0.0707402	0.0120654	0.00528619	0.0463466	0.049494	0.0867056	0.185878	0.051223	0.0202906	0.00570672	0.0122501	0.0769386	0.0161058
GSM990348	76	0.0081799	0.0964558	0.0363221	0.00594864	0.0168849	0.00433126	0.0607504	0.0996162	0.00841066	0.0180412	0.0165685	0.00113398	0.22851	0.0164392	0.196748	0.141694	0.0306726	0.0789435	0.0432642	0.0167519	0.0825972	4.12846e-05	0.0409047	0.01201	0.0122182	0.0886638	0.0604381	0.0149291	0.0351533	0.010772	0.0107128	0.0503157	0.178156	0.172359	4.12846e-05	0.0865879	0.142428	0.00106371	0.0936754	0.0479459	0.0604352	0.151945	0.117983	0.0392755	0.00562003	0.0203925	0.0644575	0.0257896
GSM990400	76	0.0128907	0.0936008	0.00775856	0.00866737	0.0170982	0.0169179	0.0373497	0.0649986	0.00406244	0.00382601	0.021302	0.0110898	0.128815	0.0239389	0.0822933	0.0901073	0.0247432	0.103205	0.0211164	0.01878	0.0343999	0.0125619	0.00437245	0.00395716	0.00351096	0.101314	0.0528401	0.016477	0.0225646	0.022768	0.0140865	0.0410467	0.135167	0.157499	0.00363166	0.0855015	0.0629182	3.78084e-05	0.0342848	0.0456814	0.0824266	0.15728	0.136865	0.0274205	0.00519018	0.0104021	0.0697404	0.00570085
GSM990431	76	0.0105719	0.162347	0.0073758	0.00298617	0.0104432	0.0248083	0.135261	0.155161	0.00211004	0.0127712	0.0364242	2.83356e-05	0.189245	0.0255516	0.21028	0.0948785	0.0252471	0.169728	0.0438745	0.0234988	0.107854	0.00724205	2.83356e-05	0.0167051	0.00603248	0.240448	0.0651099	2.83356e-05	0.0260523	0.0309178	0.00787554	0.0936427	0.238634	0.16432	0.0292449	0.165494	0.0553376	2.83356e-05	0.0262922	0.051316	0.0635226	0.168335	0.0863136	0.05631	2.83356e-05	0.00831629	0.100472	0.0187699
GSM990437	76	3.48809e-05	0.0413489	3.48809e-05	0.0108299	0.00504664	0.0188223	0.00274727	0.0292597	0.00672734	3.48809e-05	0.0480343	3.48809e-05	0.117996	0.0183964	0.0943845	0.0312199	0.0218263	0.0335126	0.00728793	3.48809e-05	0.00748285	0.00142945	3.48809e-05	3.48809e-05	3.48809e-05	0.0154369	0.0373459	0.0138279	0.0150673	0.0213122	0.0147365	0.0212231	0.0422903	0.0427033	3.48809e-05	0.0380127	0.0185184	3.48809e-05	0.0183211	0.0443214	0.081363	0.119034	0.0682171	0.00116243	3.48809e-05	0.0168443	0.0399895	0.00685915
GSM990466	76	0.0102827	0.0505112	0.0141865	0.00185244	0.0106871	0.0146412	0.0280858	0.0795254	0.0120709	0.0127846	0.00639906	0.00853539	0.0883589	0.0209765	0.0981518	0.03945	0.0189866	0.0698085	0.0665185	0.0119717	0.0699662	0.00300604	0.00361885	0.00139215	0.00927231	0.0551067	0.0240665	0.0123696	0.0237623	0.0174254	0.0197871	0.0243255	0.123306	0.0655656	0.0110779	0.0649658	0.00960094	0.00268593	0.0370153	0.0430249	0.0772096	0.147792	0.0255187	0.0174031	0.00889466	0.0164146	0.0500244	0.0116121
GSM990471	76	0.00327297	0.0461234	0.00506799	0.00233197	0.00598686	0.00373625	0.0242331	0.0103916	0.00931315	0.0123435	0.00788872	0.00662079	0.0765344	0.0174249	0.123744	0.027596	0.0175874	0.0240681	0.0244241	2.77453e-05	0.022459	0.00943582	0.00144849	0.0063978	0.00997526	0.0309605	0.063103	0.0153386	0.00649403	0.0146386	0.00771828	0.0166271	0.0588549	0.0800666	0.0110007	0.0183774	0.00988936	0.00391022	0.0245206	0.0405879	0.0616405	0.132865	0.0132367	0.0149035	2.77453e-05	0.0125034	0.0494165	0.0182023
GSM990481	76	0.0137853	0.244351	0.0130742	0.0228415	0.0107522	0.016587	0.0822097	0.153353	0.00593287	0.0114054	0.062156	0.00647207	0.187935	0.0122499	0.125007	0.0883706	0.025607	0.278362	0.0498475	0.0333879	0.0585963	0.00900803	0.0426005	0.0113009	0.0130393	0.157354	0.0469777	0.0112763	0.0268816	0.0181011	0.00916955	0.057206	0.257034	0.189324	3.54383e-05	0.165689	0.0401814	0.0021441	0.0472915	0.0380371	0.0721819	0.180815	0.107183	0.100263	0.00327421	0.0135035	0.12671	0.0115328
GSM990482	76	0.00886928	0.0882598	0.0081909	0.0146052	0.0142429	0.0209792	0.0227079	0.0359987	0.00779907	3.12129e-05	0.0438107	3.12129e-05	0.0770158	0.0171372	0.115831	0.0915709	0.0169001	0.0611922	0.0391786	0.00855954	0.058853	3.12129e-05	0.00159627	0.00646392	0.0129221	0.0801265	0.0452984	0.0126022	0.0134272	0.0301929	0.0207745	0.0177856	0.0832776	0.05949	0.0054823	0.0527095	0.0108403	0.00143647	0.0207616	0.0429285	0.0659282	0.136269	0.03731	0.0275233	0.00367529	0.0122034	0.0535848	0.0100978
GSM990564	76	0.0108083	0.171912	0.0145114	0.00766911	0.0174569	0.0313284	0.113066	0.0933094	0.00655865	0.014961	0.0258357	0.0017014	0.146369	0.0304088	0.191186	0.102954	0.0235378	0.176512	0.0636601	0.0280112	0.0934078	0.0035999	0.00621638	0.0240116	0.0147627	0.162365	0.0559666	0.0175588	0.0329554	0.0163215	0.0168225	0.0372267	0.216404	0.379941	0.0134657	0.130196	0.122496	0.00844342	0.0754295	0.0552102	0.0856036	0.1874	0.0808498	0.0606941	0.00459051	0.00444961	0.0952731	0.0216847
GSM990568	76	0.00547216	0.0390996	0.00118505	0.00241387	0.00635083	0.0184085	0.00575632	0.0280936	3.1584e-05	0.00544842	0.027271	3.1584e-05	0.0799932	0.021516	0.111076	0.0263572	0.0119287	0.0368161	0.0181425	0.02755	0.0133177	3.1584e-05	0.00866789	0.00603021	0.00899642	0.0104874	0.0237107	0.0240711	0.0118441	0.0256211	0.00546103	0.0052666	0.0411617	0.0486429	0.00898899	0.0231576	0.010309	0.00646124	0.00121728	0.0163813	0.0695047	0.101498	0.0340427	0.0236802	0.00154044	0.00406871	0.0515097	0.00156581
GSM990577	76	2.80967e-05	0.0600932	0.0145583	0.00608265	0.0201782	0.0282248	0.0283595	0.0958115	0.0153149	0.0203884	0.040146	0.0044492	0.145031	0.0197143	0.162435	0.144174	0.0329915	0.127001	0.0517779	0.0078956	0.0634916	0.0066366	0.0306627	0.0160181	0.00691045	0.157795	0.1143	0.0159753	0.0185017	0.0381915	0.0216335	0.0268368	0.153014	0.207994	0.0143106	0.107508	0.0284122	0.00512303	0.032344	0.0475498	0.0895033	0.15992	0.0766078	0.0253075	2.80967e-05	0.00882269	0.0883466	0.0236999
GSM989834	75	0.0184613	0.074853	0.00686813	0.0356262	0.0221679	0.0262877	0.0197194	0.0579129	0.000279201	0.0127305	0.0261147	0.010642	0.11826	0.0208229	0.158945	0.0860756	0.0338006	0.0406285	0.0248798	0.0115105	0.0327756	0.0178996	0.00543641	0.0144923	0.00835784	0.0552178	0.0490031	0.00954646	0.0144981	0.0249168	0.0198573	0.0218833	0.067834	0.0923112	0.00818421	0.0452209	0.0303387	0.00491315	0.0319733	0.0551298	0.0712573	0.162383	0.0250659	0.0156433	0.0105744	0.0182883	0.0615327	0.0586777
GSM989856	75	4.45177e-05	0.178522	0.0120815	0.0158476	0.0344668	0.0241966	0.0691376	0.123367	0.00956558	0.020731	0.0570905	0.00626493	0.120496	0.0164077	0.233246	0.0628988	0.0386117	0.0901051	0.0553648	0.0286573	0.0466748	0.0238437	0.180999	0.0205651	0.00962874	0.111155	0.114184	0.0187911	0.030366	0.0203137	0.012202	0.0315454	0.153389	0.12452	0.0153478	0.1274	0.0306386	0.00294599	0.0507126	0.0489041	0.0836656	0.173331	0.0551317	0.0286328	0.00899069	0.0129434	0.10306	0.0586346
GSM989929	75	0.0155569	0.0928206	0.00437842	0.00898631	0.0159586	0.0279033	0.0192206	0.0515555	0.0114202	0.00212613	0.0169701	0.0173919	0.11435	0.00957956	0.141216	0.0609484	0.0344783	0.0428496	0.0253306	0.0163698	0.0419296	0.0105034	0.0430402	0.0081943	0.0114719	0.0568903	0.0407498	0.0195463	0.0247603	0.0118004	0.0123367	0.0184434	0.0588957	0.120413	0.00728403	0.0339608	0.00961556	0.00379542	0.0188496	0.0607145	0.0807649	0.144581	0.0506157	0.0152842	0.00268841	0.006924	0.0801375	0.0434632
GSM989967	75	0.00767328	0.167327	0.0125791	0.0617888	0.0200742	0.0265302	0.0712579	0.0844054	0.0119828	0.0151097	0.0402707	0.00688845	0.160071	0.0209609	0.0880164	0.0149042	0.0215464	0.258085	0.0417854	0.0227146	0.0473049	0.00824918	0.0160158	0.0132445	0.0105347	0.0664615	0.0553246	0.0138414	0.0294376	0.0304539	0.0139361	0.059001	0.162807	0.14355	0.0205311	0.109099	0.0479946	0.00254398	0.0470672	0.0516677	0.0817777	0.177177	0.135274	0.0528727	0.00442419	0.0107314	0.115736	0.0302258
GSM990029	75	0.00899695	0.101166	0.00295361	0.00325244	0.0173563	0.031818	0.0794813	0.0313422	0.00757602	0.000506199	0.0816684	4.4186e-05	0.0966405	0.0212774	0.112949	0.0683959	0.0299336	0.0865749	0.0311138	0.00884287	0.0543257	0.00102616	0.00635566	0.0109463	0.00657134	0.114647	0.0419753	0.0119502	0.0286698	0.0245081	0.0165937	0.0362755	0.0955721	0.228752	0.0145109	0.051496	0.0254795	0.0037541	0.0165572	0.0516652	0.0716474	0.161722	0.127074	0.0212079	0.0034983	0.00701751	0.0699786	0.0162437
GSM990052	75	0.00998756	0.090472	0.00511066	0.0087091	0.0190188	0.0250057	0.044818	0.0675089	0.0116075	0.0214699	0.0270658	0.0102874	0.148347	0.0165256	0.213965	0.0605729	0.0447359	0.117764	0.038214	0.0325805	0.0594887	0.00747504	0.0302016	0.0104276	0.00354972	0.12731	0.0436573	0.0153096	0.023946	0.0235561	0.0236459	0.0421627	0.153093	0.208496	4.78943e-05	0.0905557	0.0574351	0.007371	0.0408333	0.0596033	0.0789725	0.16608	0.052746	0.036102	0.0132483	0.0216254	0.0760031	0.0306295
GSM990066	75	0.0111728	0.061468	0.00639719	0.00809896	0.0136744	0.0188769	0.019606	0.0513318	0.0141849	0.0112122	0.0204875	0.0134251	0.11311	0.0166623	0.143953	0.0428782	0.0325741	0.0338266	0.0338836	0.0202555	0.0560762	0.00715687	0.0154382	0.0190302	0.013464	0.051708	0.0381473	0.0187506	0.0181251	0.0230634	0.0160566	0.0370847	0.0951533	0.0935618	0.00831105	0.0658808	0.0254678	5.39926e-05	0.0339221	0.0594197	0.084592	0.145013	0.0446825	0.0246436	0.0136146	0.0120579	0.0795497	0.0395324
GSM990459	75	0.0137289	0.114618	0.0128644	0.0197963	0.00882996	0.0162818	0.0834118	0.152703	0.000532158	0.0260994	0.018121	0.00678098	0.13885	0.0103915	0.158069	0.0403534	0.0196317	0.198828	0.0685145	0.0295495	0.0471741	0.0056633	0.181609	0.0112763	0.00415286	0.11507	0.114443	0.00695428	0.0311801	0.010373	0.0127459	0.0443464	0.210847	0.255687	0.00623152	0.0826325	0.0294823	0.000895716	0.0503724	0.0333315	0.0758985	0.141805	0.100614	0.043522	0.00293014	0.00903843	0.0898183	0.00815512
GSM990513	75	0.000844157	0.0919506	0.00222806	0.0109073	0.00580949	0.0164097	0.0330165	0.0596037	4.18466e-05	0.00822505	0.0216713	4.18466e-05	0.117133	0.014484	0.111099	0.057941	0.0241149	0.139048	0.0404555	0.00732374	0.0348602	0.00082714	4.18466e-05	0.00674401	0.00596389	0.0455382	0.0358018	0.0101279	0.0107373	0.00396239	0.00925173	0.0156668	0.128804	0.202109	0.0171454	0.0551043	0.0162375	0.00183873	0.0128687	0.00711794	0.0686706	0.105881	0.0763039	0.0323457	0.000334832	0.00983267	0.050974	0.00710685
GSM990594	75	0.00966571	0.222067	0.00663914	0.0162255	0.00977997	0.0241767	0.263728	0.197942	2.83217e-05	0.0442169	0.0238099	0.00460241	0.243441	0.0156547	0.188393	0.135544	0.0334101	0.229805	0.0555205	0.0275332	0.0587472	0.00234216	0.0027192	0.018565	0.00432891	0.164965	0.0639967	0.0378862	0.0571507	0.0109042	0.0111409	0.0943274	0.225306	0.282558	0.0350071	0.181426	0.13326	0.00500217	0.0385315	0.0547882	0.0770107	0.213817	0.158425	0.0794128	0.00616711	0.0109114	0.138871	0.0240933
GSM990601	75	0.0107424	0.0775753	0.00526128	0.0105693	0.00696414	0.0218963	0.0144886	0.115825	2.73878e-05	0.0127607	0.0280131	0.0101554	0.132301	0.0140634	0.190274	0.0861686	0.0324419	0.116212	0.0602149	0.00668474	0.0598444	0.00669099	0.0801999	2.73878e-05	0.0180152	0.100247	0.143381	0.0189623	0.0242871	0.0134372	0.0108012	0.0183926	0.105348	0.216344	2.73878e-05	0.0716671	0.0264002	0.00344568	0.0212772	0.0445765	0.0726811	0.146901	0.0461072	0.0343723	2.73878e-05	2.73878e-05	0.100405	0.00574418
GSM989851	74	0.00713948	0.125998	0.0135081	0.0349255	0.027548	0.033621	0.0838799	0.107846	4.0999e-05	0.039785	0.0434514	0.00486696	0.170176	0.0173736	0.174934	0.0681228	0.0344801	0.149652	0.0550793	0.0318894	0.0693173	0.0152111	0.0261825	0.0186392	0.00310862	0.130984	0.103829	0.021707	0.0343316	0.0217897	0.0185054	0.0289198	0.167785	0.232654	0.00292989	0.134843	0.0330843	0.00386616	0.0478915	0.0563862	0.0866098	0.169214	0.0910565	0.0637619	0.00791651	0.0119213	0.123757	0.052454
GSM989852	74	0.0105787	0.156133	0.0121638	0.0192003	0.0313701	0.0271424	0.144843	0.112269	0.0127134	0.00659962	0.0906095	0.0130008	0.204003	0.033897	0.136154	0.0503329	0.043898	0.259342	0.0679764	0.054062	0.0881464	0.0259104	0.0189715	0.02562	2.87013e-05	0.186631	0.101251	0.0306876	0.0232256	0.032311	0.00900626	0.0917378	0.251338	0.293579	0.0386145	0.129597	0.0710806	0.00377946	0.119865	0.0524853	0.0905413	0.146399	0.110804	0.0819122	0.00349141	0.0164286	0.118871	0.0473062
GSM989860	74	0.00557875	0.0713779	0.00702978	0.00254911	0.0214263	0.0306466	0.00775978	0.0322708	0.00119556	0.00837401	0.0315931	0.00696765	0.0739701	0.0159536	0.145247	0.0312205	0.0372745	0.0337908	0.0352904	0.00947745	0.0434381	0.00455066	0.00467893	0.0182785	0.00615467	0.0523563	0.0468079	0.0193676	0.0171046	0.0273197	0.0386314	0.0230318	0.0928321	0.0595775	0.00883377	0.0373318	0.0125746	0.00237514	0.0415018	0.0566468	0.0745344	0.151699	0.0289991	0.0149279	0.00262508	0.0224552	0.0740517	0.0368891
GSM989868	74	0.00789957	0.112604	0.0104253	0.00895625	0.0161916	0.0263436	0.0371312	0.0535355	0.00576713	0.00456265	0.0247723	0.00888259	0.111791	0.0163434	0.208691	0.0818333	0.0361515	0.0708032	0.0448658	0.0070611	0.0520783	0.0132071	0.0281489	0.0154634	0.0120374	0.0776958	0.0643526	0.0155529	0.0116556	0.0295582	0.0119533	0.0333676	0.13463	0.0375986	0.010198	0.0711814	0.010379	0.00111649	0.0448788	0.0427927	0.089647	0.154943	0.0534526	0.0377268	0.00533425	0.00844781	0.0899369	0.0502759
GSM989914	74	0.00454965	0.120342	0.0124868	0.0348905	0.0128709	0.0139171	0.170621	0.0997005	3.94023e-05	0.0328453	0.0274323	3.94023e-05	0.109071	0.0105074	0.149759	0.0693159	0.0302309	0.119224	0.0703215	0.023662	0.0949826	0.0157208	0.131584	0.0120952	0.009805	0.134736	0.0614201	0.0129029	0.0267473	0.0143818	0.0119617	0.0421602	0.213608	0.287222	0.00687937	0.0809127	0.0193571	0.0023955	0.0605079	0.0369389	0.0715729	0.160922	0.0915446	0.0393344	3.94023e-05	0.0124499	0.143852	0.0312355
GSM989942	74	0.00861686	0.140999	0.00474059	0.00762246	0.0142727	0.020763	0.0570566	0.110367	3.69341e-05	0.00548991	0.0226748	0.0199332	0.116246	0.0178809	0.187612	0.0616961	0.049297	0.148874	0.0424132	0.00984477	0.0730755	0.00814196	0.0327704	0.00250612	0.00491879	0.122677	0.0603743	0.0118895	0.0143132	0.0209157	0.0024177	0.0418052	0.179473	0.246905	3.69341e-05	0.0898757	0.0479547	3.69341e-05	0.0498825	0.0543228	0.076944	0.155611	0.0953023	0.0650637	6.10408e-05	0.0113553	0.116254	0.040599
GSM990015	74	0.00921071	0.21086	0.0150713	0.0161079	0.0151231	0.02485	0.173917	0.0904724	0.00952175	0.015068	0.0328205	0.0102504	0.18861	0.022596	0.264072	0.162526	0.0570348	0.172394	0.0417633	0.0238334	0.0960729	0.0216903	0.0110434	0.00979296	0.00708626	0.170017	0.050307	0.0178856	0.0428475	0.0210854	0.0173357	0.0837822	0.261447	0.282669	0.019106	0.166901	0.049285	4.629e-05	0.0828481	0.0612654	0.0818978	0.169103	0.0830405	0.0982859	0.00753489	0.0116757	0.100595	0.0299166
GSM990034	74	0.00823842	0.106995	0.00427004	0.0282251	0.0155611	0.0202189	0.0740242	0.0947714	0.000318261	0.0138423	0.0141741	0.00269943	0.165709	0.0187451	0.216281	0.0902784	0.0364191	0.163462	0.0240888	0.00936972	0.0689129	5.06732e-05	0.0367481	0.00670214	0.00489921	0.145875	0.132744	0.0115124	0.0210463	0.0200575	0.0102431	0.044058	0.189256	0.188663	0.0620923	0.0781494	0.0405908	0.00227103	0.00592818	0.0320771	0.067872	0.179405	0.079807	0.0210723	5.06732e-05	0.00414537	0.0702143	0.0215538
GSM990061	74	0.00988837	0.094211	0.0102635	0.0344834	0.0147286	0.0213363	0.107773	0.0936291	0.0249358	0.0210826	0.0285252	0.0152051	0.114284	0.0243427	0.206972	0.0506128	0.0366206	0.0857745	0.037636	0.0238534	0.0446482	0.0103949	0.0336681	0.0174499	0.0198596	0.0962176	0.0485833	0.0200586	0.0252418	0.0273062	0.022843	0.0384881	0.108148	0.145768	0.0206148	0.0925899	0.0130976	0.0027152	0.038275	0.0454454	0.0818564	0.154335	0.0371273	0.0224935	0.011128	0.0170475	0.0600943	0.0234998
GSM990422	74	0.00296763	0.141344	0.00774363	0.027511	0.0150833	0.0243767	0.0319556	0.0632588	0.0453924	6.9735e-05	0.00326651	0.0128167	0.169588	0.00175094	0.129272	0.0397165	0.000948795	0.133723	0.0557137	0.0233887	0.120537	0.0183464	6.9735e-05	0.00762931	0.0160582	0.158917	0.0842851	6.9735e-05	0.0145279	0.00748013	0.019768	0.0413021	0.180985	0.102548	0.0214497	0.0501427	0.0382875	0.0151778	0.159969	0.0460828	0.0506939	0.173847	0.0553705	0.0194904	0.0112826	0.0298628	0.0509795	0.023306
GSM990489	74	0.00713002	0.0624342	0.0148412	0.00428468	0.0126999	0.0227049	5.16036e-05	0.0451313	0.0108563	5.16036e-05	0.0188883	5.16036e-05	0.0772186	0.0248401	0.0745943	0.0363492	0.0267406	0.0506329	0.0327109	0.0171237	0.0281415	0.00294901	0.00239884	0.00933921	0.00377071	0.0460495	0.0344518	0.0148801	0.0179617	0.0171801	0.0166257	0.0103371	0.0700873	0.132772	0.00208193	0.0417107	0.0076935	5.16036e-05	0.0163749	0.0457646	0.068505	0.137573	0.0221864	0.0114121	0.0067237	0.00973836	0.0353813	0.0223062
GSM990561	74	0.00449537	0.147672	0.00650408	5.90089e-05	0.0175605	0.0346517	0.0489494	0.0819587	1.81408e-05	0.0122291	0.0260788	0.0211557	0.152484	0.0240658	0.237009	0.0701518	0.0267895	0.177602	0.0406717	0.00310671	0.0736066	0.0150442	0.00632966	1.81408e-05	0.0042912	0.0994679	0.0430529	0.0130753	0.0253014	0.0247526	0.0105691	0.025628	0.158651	0.203194	0.0108598	0.0848524	0.0348586	0.0100461	0.0426689	0.0453186	0.083592	0.112558	0.0345641	0.0281187	1.81408e-05	0.0138069	0.103347	0.0144648
GSM990603	74	0.00801115	0.209057	4.51289e-05	0.0504807	0.0238016	0.0322279	0.0567678	0.107454	0.00602078	0.0255136	0.0290104	0.00910163	0.18087	0.0226811	0.121255	0.0458375	0.024281	0.177954	0.0486305	0.030115	0.0427638	0.00165983	0.0159317	0.0137669	0.0110952	0.14608	0.0629724	0.00811621	0.0381901	0.0144693	0.00123667	0.0196867	0.163958	0.138524	0.0326182	0.11441	0.0458081	0.00679597	0.046981	0.0601783	0.0664387	0.1437	0.0591621	0.0550568	0.0044071	0.00893641	0.0893822	0.0168403
GSM990610	74	0.00843966	0.178396	0.00157729	0.0299206	0.0159791	0.0368735	0.158469	0.213858	0.0117781	0.00775998	0.0536366	0.00210001	0.196501	0.0278948	0.140548	0.111964	0.0219761	0.257879	0.0390382	0.0557057	0.0768063	0.0041272	0.00192721	0.164648	0.00294375	0.215739	0.0329998	0.0103897	0.00959562	0.0180848	0.00477479	0.0838022	0.182492	0.314934	2.6713e-05	0.171548	0.0531398	0.000540374	0.0748498	0.0320947	0.102123	0.149066	0.209368	0.0477857	0.00411853	0.00739244	0.0849288	0.0381743
GSM989833	73	0.0123599	0.0683343	0.00376169	0.00365861	0.0276503	0.0348775	0.0193353	0.0779088	0.00517742	0.00910479	0.0298505	0.00306417	0.156664	0.0111429	0.147604	0.0524255	0.0429892	0.0531761	0.0402798	0.00853473	0.0353856	0.0165671	0.00736752	0.0193983	0.00701036	0.0680861	0.035709	0.0149927	0.0228686	0.0127414	0.0182951	0.0167557	0.109878	0.111938	0.00740133	0.0419663	0.0263691	0.00553382	0.0414607	0.0564826	0.0941902	0.154581	0.0426611	0.031732	5.56432e-05	0.0182581	0.0907227	0.068016
GSM989835	73	0.00850741	0.1131	0.0134015	0.0170298	0.0329531	0.0291921	0.0616054	0.0799683	0.00011916	0.0398034	0.0548778	0.00702881	0.133617	0.0298384	0.14695	0.0499182	0.0451112	0.115485	0.0413239	0.0336633	0.0762845	0.0293475	0.00196191	0.0229654	0.0126098	0.0841303	0.0300447	0.0138359	0.0135745	0.038058	0.0221434	0.0244619	0.131581	0.146156	0.0182011	0.10002	0.0143486	0.00263605	0.030502	0.0698974	0.0951113	0.157334	0.0904027	0.0618071	0.009497	0.0271703	0.0930739	0.0448223
GSM989858	73	0.00768161	0.117752	0.00550283	0.00336514	0.0228126	0.0306699	0.0667709	0.0905327	0.00874752	0.0158666	0.0530102	0.00104701	0.0873031	0.016171	0.132512	0.139596	0.0428375	0.138436	0.0321061	0.0298752	0.0670446	0.0145371	4.24194e-05	0.0253815	0.00907918	0.0937414	0.0849455	0.0189329	0.0175152	0.0208267	0.00441277	0.113262	0.0911704	0.111684	0.0237122	0.124613	0.0246091	0.00173923	0.0461809	0.0625533	0.084265	0.175488	0.0329788	0.0246844	0.00742542	0.0125723	0.106865	0.0573579
GSM989870	73	0.00598248	0.0382455	0.00663753	0.00313483	0.026361	0.0196893	0.0216481	0.0291152	0.00865849	0.00405535	0.0159893	0.0114681	0.0765217	0.0147688	0.16547	0.0474485	0.035412	0.0692704	0.0432951	0.00866524	0.0364576	0.0138061	3.86302e-05	0.00935839	0.00898843	0.0471489	0.0253465	0.0187666	0.0102688	0.0181453	0.0112627	0.0126824	0.0330587	0.0433313	0.00704311	0.0295029	0.00462967	0.00687168	0.0320044	0.0474045	0.0749356	0.138581	0.0107256	0.0151309	0.00669994	0.0103271	0.0525389	0.0344261
GSM989879	73	0.0120362	0.264689	0.0222972	0.0120085	0.0314208	0.0310084	0.0777789	0.126857	0.00259893	0.0128474	0.0391565	4.26386e-05	0.145664	0.0134886	0.134301	0.0682764	0.0387186	0.340572	0.222982	0.15425	0.0583307	0.015485	0.0304947	0.0201154	0.011809	0.0932295	0.100799	0.0122953	0.0172756	0.0361643	0.0214029	0.0247264	0.183256	0.187321	0.0192091	0.0818428	0.268251	0.00623751	0.041522	0.0416232	0.0841722	0.204487	0.124486	0.0343147	0.00262925	0.0151213	0.088719	0.0543385
GSM989881	73	0.00963054	0.164294	0.00365307	0.00915013	0.0217164	0.0183975	0.0717723	0.0707179	0.0113914	0.0164787	0.0331882	0.00932879	0.176251	0.0146608	0.169493	0.0644199	0.030885	0.186053	0.0538409	0.0202219	0.0433984	0.00237375	0.005196	0.0167884	0.0107214	0.118908	0.0512282	0.0139896	0.0206526	0.0299577	0.015292	0.0310714	0.171049	0.238601	0.0108422	0.0972545	0.0498994	0.00519721	0.0380999	0.0543948	0.0747946	0.171503	0.0588323	0.0587865	0.00809647	4.23234e-05	0.0797217	0.0441946
GSM989887	73	0.00575704	0.252123	0.0130278	0.0167644	0.0281371	0.0286733	0.0473877	0.0984999	0.0107171	0.0106378	0.0132613	0.00455203	0.143722	0.0145248	0.155824	0.0507044	0.0304407	0.236988	0.0772046	0.021063	0.162004	0.0100477	0.00278758	0.0119446	0.00948062	0.106731	0.0574906	0.0120419	0.026382	0.0248054	0.0134746	0.0565216	0.21714	0.094304	0.00783323	0.184351	0.0232173	4.09609e-05	0.119474	0.0511006	0.0650846	0.173562	0.0790931	0.0639104	0.00248312	0.01987	0.193173	0.031622
GSM989897	73	0.00610214	0.177245	0.00966128	0.0200132	0.0363156	0.020094	0.0410134	0.0995184	0.00373472	0.019647	0.0396324	0.0165911	0.150629	0.0142005	0.0932597	0.0552898	0.0359956	0.257187	0.0537069	0.0138513	0.0507083	0.0135711	0.0527208	0.0240976	0.00127339	0.0871358	0.0457768	0.0133589	0.0208781	0.022603	0.024789	0.0435404	0.187375	0.0607943	0.00172999	0.110652	0.0292352	3.60911e-05	0.057916	0.0454887	0.0869381	0.151097	0.059323	0.0642326	0.011349	0.0151695	0.106057	0.0508962
GSM989905	73	3.3756e-05	0.133856	0.00306577	0.0285636	0.0223377	0.0231418	0.0618459	0.0685689	0.00677373	0.0166651	0.0310143	0.0152401	0.13355	0.0146594	0.130539	0.0469399	0.0295604	0.177111	0.049304	0.00665953	0.0678349	0.0198278	0.0434338	0.0094724	0.0146667	0.113422	0.0584473	0.00390276	0.00600131	0.0267951	0.0125817	0.0275775	0.157985	0.107296	0.0107065	0.0901081	0.0293408	0.00338764	0.0459194	0.056199	0.0735722	0.154287	0.0735961	0.0624473	3.3756e-05	0.0203062	0.101597	0.0501713
GSM989964	73	0.01033	0.0478446	0.006496	3.40903e-05	0.017789	0.0184436	0.0284483	0.0422049	0.00473423	0.00967104	0.0300905	0.00393468	0.114079	0.00756062	0.120284	0.0720625	0.0458121	0.0618841	0.0313567	0.0192018	0.0498476	0.0180846	0.0176971	0.010084	0.0107222	0.0559368	0.0340143	0.0162154	0.0209594	0.0158686	0.0139401	0.0116694	0.106414	0.022819	0.0216919	0.044574	0.0166512	0.00149003	0.0177169	0.0504761	0.0677839	0.121296	0.0368862	0.0190732	3.40903e-05	0.0160624	0.0653826	0.0208218
GSM990016	73	0.0178381	0.248004	0.00776896	0.0152722	0.021444	0.0225075	0.150783	0.16489	4.45323e-05	0.00680996	0.0301382	4.45323e-05	0.197618	0.0185862	0.186645	0.0613421	0.0355919	0.333824	0.0883043	0.0329435	0.136598	4.45323e-05	0.0274313	0.0258452	0.0123089	0.179256	0.0859566	0.0151372	0.030746	0.0163568	0.0149868	0.100421	0.264411	0.337408	0.0111451	0.128212	0.0739687	4.45323e-05	0.0779336	0.0385336	0.0678043	0.20734	0.113773	0.110184	0.00144994	0.0187571	0.130303	0.0219352
GSM990042	73	0.00238925	0.0488018	0.00483815	0.00214255	0.0097835	0.0179806	0.0455536	0.0558279	0.00375247	0.00570324	0.0320914	2.99851e-05	0.118897	0.0161785	0.160977	0.0259202	0.0374699	0.0746816	0.0136358	0.0216763	0.0375858	0.00247009	0.0340911	0.0062478	0.00497392	0.0637299	0.0354471	0.00967653	0.0266448	0.0139019	0.0127771	0.0230474	0.0598689	0.0583301	0.00697805	0.0548162	0.00437856	2.99851e-05	0.0110276	0.029201	0.0752679	0.118473	0.0342214	0.0259479	2.99851e-05	0.010704	0.0674161	0.0146145
GSM990059	73	0.0134587	0.16565	0.0140489	0.0134902	0.0146056	0.015484	0.0367784	0.0498798	5.51451e-05	0.0340367	0.0248325	0.012146	0.106893	0.0195177	0.259687	0.0873207	0.0312478	0.0983825	0.0431285	0.0112466	0.10016	0.0129611	5.51451e-05	0.00360795	0.00766873	0.112464	0.0190799	0.0261867	0.0216126	0.0320458	0.0126152	0.0724763	0.168693	0.215514	0.0141644	0.078779	0.0362156	0.00941823	0.0623431	0.0320427	0.0884433	0.184977	0.113682	0.0283176	0.00915916	0.0311932	0.100339	0.024573
GSM990060	73	0.00816493	0.0630762	0.0116651	0.00316247	0.0169706	0.018051	0.00366045	0.0210236	0.0123275	0.0142881	0.00741683	0.0131523	0.10171	0.0224411	0.0977068	0.0636137	0.0373953	0.0488427	0.0325362	0.0150971	0.0358001	0.0118071	0.0207937	0.00448911	0.00766207	0.0800604	0.05211	0.0203848	0.0150263	0.0174893	0.0175349	0.0434444	0.0629934	0.119827	0.00883205	0.0451845	0.0201352	0.00196931	0.0432714	0.0519673	0.0640914	0.13115	0.0506655	0.0248157	0.00286955	0.014756	0.0747375	0.0332718
GSM990062	73	0.00941276	0.130098	0.00827707	0.0292307	0.0175068	0.0265423	0.0867276	0.0558554	0.0172285	0.0215853	0.0598097	0.0107982	0.231994	0.0120543	0.126109	0.110124	0.0300908	0.122605	0.0696707	0.0382261	0.0813856	0.0137048	0.0225851	0.0202818	0.0150878	0.162866	0.0655657	0.0169533	0.0213465	0.0231165	0.0217492	0.0758435	0.214972	0.242051	0.0187106	0.110562	0.0721322	0.00554278	0.0596211	0.0590051	0.079145	0.166894	0.0887348	0.0431754	0.00782589	0.032515	0.084324	0.0251151
GSM990096	73	0.0089929	0.135759	0.0104296	0.00525815	0.0286746	0.0283972	0.306811	0.217156	0.0032733	0.00754426	0.114705	0.00499917	0.19391	0.0148807	0.0549873	0.0600095	0.0202268	0.037551	0.0596917	0.0110056	0.125794	0.0112147	3.80429e-05	0.00866325	0.0101626	0.0535974	0.03269	0.0127135	0.0210238	0.0216899	0.0178634	0.0682976	0.0835656	0.0487724	0.00230945	0.0306644	0.00319489	3.80429e-05	0.0257486	0.0304839	0.0750276	0.124651	0.0741121	0.0582945	0.00452151	0.0633433	0.0498311	0.0197928
GSM990441	73	0.00959471	0.0860794	0.0122669	0.0313795	0.0129784	0.0161199	0.0375022	0.0711554	2.89569e-05	0.017557	0.0405976	0.00606312	0.148531	0.0267626	0.112202	0.0759191	0.0231018	0.0882258	0.0263157	0.00708837	0.0572487	0.0117033	0.0273638	2.89569e-05	0.00293967	0.0753963	0.0650704	0.00366864	0.0257259	0.0337203	0.0137015	0.112642	0.147867	0.187802	0.000660342	0.08798	0.0305673	0.00329317	0.0287753	0.035565	0.100256	0.151487	0.0593665	0.0327405	0.00640884	0.0137606	0.0599853	0.00778357
GSM990492	73	0.000130228	0.141754	0.0110998	0.0219077	0.00696199	0.0289561	0.0581272	0.0504458	0.018385	0.0063549	0.026042	0.00912027	0.138334	0.0181377	0.0981283	0.0315775	0.0290707	0.11478	0.0428474	0.0108249	0.0616608	0.00269771	6.01247e-05	0.00648773	0.0104558	0.0564405	0.0526694	0.0104998	0.0163237	0.012594	0.0302972	0.0480821	0.118435	0.0581375	0.0010994	0.0708138	0.0175834	0.00190464	0.0157955	0.0476374	0.0552891	0.152942	0.0394745	0.0247415	6.01247e-05	0.0118784	0.100449	0.0125687
GSM990551	73	0.00091767	0.132239	0.0013586	0.00490478	0.00174253	0.02329	0.0899434	0.0468643	0.021903	0.0386698	0.0772572	3.06908e-05	0.154635	0.0174545	0.173531	0.0912256	0.0226083	0.259775	0.051785	0.0279869	0.04563	0.00190705	3.06908e-05	0.0148298	0.0141916	0.155333	0.0630185	0.0115258	0.0184841	0.0162675	0.012865	0.0308918	0.178226	0.191707	0.011631	0.0860819	0.0492032	0.0106934	0.0424257	0.0434894	0.0762401	0.129288	0.0578036	0.0278817	3.06908e-05	0.0165739	0.0887976	0.0417104
GSM990555	73	0.0048019	0.0618266	3.34845e-05	3.34845e-05	0.0149936	0.033632	0.000709834	0.0549702	0.0102737	0.0177908	0.00830145	0.000546867	0.0798417	0.0173422	0.0731728	0.157339	0.0253998	0.0339637	0.031954	0.014161	0.0492564	0.00624709	0.0179942	0.0196074	0.00648927	0.0538255	0.0282276	0.0192689	0.0181473	0.0176947	0.00909184	0.036179	0.0866914	0.0966042	0.00713875	0.0409591	0.00875306	3.34845e-05	0.0361458	0.0601101	0.0749231	0.125023	0.0311276	0.0103417	3.34845e-05	0.0116664	0.0880714	0.0255393
GSM990567	73	0.00381928	0.145021	0.000181897	0.0422963	0.0180398	0.0239533	0.0708429	0.11464	3.13272e-05	0.0285836	0.031542	0.00161123	0.195094	0.030167	0.194384	0.0798065	0.0256874	0.122429	0.0601378	0.0321546	0.0465016	0.000140343	0.00151449	0.022834	0.0100634	0.130669	0.0658642	0.0140573	0.0312219	0.0288661	0.0129839	0.0548271	0.180967	0.21552	0.0152163	0.118076	0.0558167	0.00579484	0.080199	0.0457856	0.0791211	0.132087	0.0530175	0.0655067	0.00725126	0.0214324	0.0742784	0.0233206
GSM990627	73	0.00138561	0.0958589	2.49171e-05	0.00632057	0.00981733	0.0127363	0.0134626	0.0811159	2.49171e-05	0.00306377	0.00670997	2.49171e-05	0.132842	0.0177797	0.142654	0.0359912	0.0140381	0.119844	0.0406708	0.00935024	0.0526355	2.49171e-05	0.0366322	0.00802236	2.49171e-05	0.0864116	0.0840185	0.00710786	0.0252017	0.00737341	0.0101835	0.016626	0.143352	0.256553	0.00629986	0.118708	0.0154397	2.49171e-05	0.0352103	0.0304839	0.0502541	0.106669	0.0376571	0.0113239	0.0035121	2.49171e-05	0.0427463	0.020384
GSM989855	72	0.00653904	0.0740659	0.0110265	0.00613837	0.0251331	0.0272211	0.0289691	0.0378357	0.00678721	0.0163101	0.0417682	0.000696844	0.12009	0.0136507	0.229145	0.0751274	0.0315056	0.0479615	0.0366042	0.021206	0.0406762	0.0292746	0.0121729	0.00930101	0.00181912	0.0491741	0.0299105	0.0168496	0.014871	0.0234031	0.0131497	0.0242562	0.0668404	0.0179451	0.000680513	0.0383829	0.0194589	0.00482386	0.0249444	0.0462643	0.0891389	0.142472	0.0274658	0.017509	0.00302075	0.0095241	0.0633889	0.0288494
GSM989894	72	0.00747925	0.0635337	0.00584396	0.000914816	0.0273445	0.0132872	0.0259171	0.058498	0.00451221	0.000237813	0.0169336	0.00442194	0.101952	0.0135745	0.109276	0.0470883	0.0342936	0.0499888	0.047457	0.00102865	0.0579659	0.0143967	0.0163888	0.0136666	0.0101304	0.0735963	0.0411	0.00777335	0.0152308	0.0166524	0.00598039	0.0385035	0.0840652	0.118916	0.00262657	0.0451205	0.0156863	0.00505281	0.03549	0.0498717	0.0739271	0.149416	0.0152864	0.0211919	0.00370023	0.0118089	0.069396	0.0537921
GSM989899	72	0.0109449	0.0695463	0.00436697	0.0104401	0.0263295	0.0260445	0.0201537	0.0478704	0.00683631	3.51692e-05	0.023119	3.51692e-05	0.114727	0.017053	0.125637	0.0274247	0.0323527	0.0495142	0.0247375	0.00567657	0.0271354	0.0207339	0.00607511	0.0168163	0.00471492	0.0386715	0.0293324	0.010758	0.0119268	0.0197905	0.00435635	0.0270953	0.077709	0.0942319	3.51692e-05	0.0630243	0.0235047	0.00470135	0.0132252	0.0428589	0.0669281	0.140485	0.0310968	0.0113504	3.51692e-05	0.0263409	0.07251	0.0313459
GSM989970	72	0.010054	0.114114	0.00292661	0.00452972	0.0207005	0.0193867	0.0236273	0.0846253	0.0149185	0.00990431	0.0251366	0.0105791	0.114243	0.0135718	0.112317	0.0823909	0.0271498	0.0900985	0.0506964	0.0327855	0.059979	0.00833423	0.00217054	0.0107147	0.00592607	0.0807154	0.0498538	0.0107565	0.0164958	0.0208747	0.0293815	0.0345097	0.161171	0.113455	0.00860474	0.0732966	0.0163617	3.33502e-05	0.0302032	0.0322671	0.0489728	0.131043	0.0499051	0.0261331	0.00282498	0.0179684	0.0701381	0.0381063
GSM990449	72	0.00324839	0.0732192	0.00786292	0.00581958	0.00413649	0.0164307	0.0336728	0.0606059	0.0020792	0.0107856	0.00973966	0.000125023	0.0878308	0.0100588	0.04929	0.0564056	0.0182292	0.154418	0.0387118	0.0150481	0.0225448	0.00402304	4.57356e-05	4.57356e-05	0.00537669	0.0836901	0.0200696	0.0112611	0.0161049	0.0058471	0.0137956	0.00734636	0.124916	0.0529819	0.00764138	0.0771591	0.00877588	0.00524654	0.00664801	0.0361453	0.0477396	0.136144	0.0279421	0.0117526	0.00355275	0.0128582	0.0254486	0.0107612
GSM990494	72	0.00737181	0.125641	0.00948417	0.0232736	0.00902014	0.0262743	0.0798252	0.0904977	0.00847691	0.0022216	0.0458994	0.0107792	0.143236	0.0202929	0.16672	0.0247649	0.029203	0.222395	0.0196069	8.86446e-05	0.0409829	0.00916338	4.59378e-05	0.0184039	0.00688422	0.186037	0.0431026	0.0158508	0.0181747	0.0139734	0.00694663	0.0464612	0.214723	0.140478	0.00209027	0.068526	0.0405713	4.59378e-05	0.0240492	0.0409469	0.0676071	0.164352	0.0412397	0.0494916	6.47668e-05	0.00481972	0.0851222	0.0129579
GSM990585	72	0.00558289	0.0417731	3.25225e-05	3.25225e-05	3.25225e-05	0.0109337	0.0146821	0.0371226	3.25225e-05	3.25225e-05	0.0113808	0.00140986	0.125052	0.0156295	0.100366	0.111534	0.00791173	0.0999068	0.0309524	3.25225e-05	0.0311173	0.00795058	3.25225e-05	0.0322428	0.00661743	0.0335279	0.0321753	0.00646965	0.00575933	0.0238095	0.0127636	0.0115447	0.0437538	0.0896477	3.25225e-05	0.0376901	0.0173042	0.00222391	0.0102288	0.0256822	0.0518326	0.0941753	0.0123208	0.0122624	3.25225e-05	3.25225e-05	0.031666	0.0205221
GSM989842	71	0.00749881	0.127627	0.017071	0.0235116	0.0299516	0.0300831	0.0256392	0.063697	0.00653325	0.0103113	0.0385026	3.84377e-05	0.157099	0.0164094	0.133732	0.0520456	0.0358104	0.0735103	0.0407892	0.00411105	0.0531402	0.0175577	0.00319988	0.0144025	0.0114484	0.0557843	0.0510526	0.013528	0.0150308	0.0265952	0.0220284	0.0255307	0.117431	0.118	0.0131568	0.061422	0.0138174	0.00586879	0.0396725	0.0477289	0.0801778	0.153547	0.0394758	0.0232473	0.00223692	0.0153922	0.0837338	0.0299921
GSM989916	71	0.0100743	0.0848303	0.00533071	0.00656145	0.0181926	0.0285892	0.0292772	0.048772	0.0211369	0.00990942	0.0205858	0.00628418	0.132901	0.0210634	0.0971427	0.0633392	0.0193313	0.0507707	0.0343017	0.0170411	0.0481789	0.00582113	0.000465158	0.0151955	0.0103749	0.0672871	0.0394797	0.0149809	0.0169946	0.0203723	0.014371	0.0347152	0.07541	0.103253	0.0214867	0.0915136	0.0140729	3.2954e-05	0.0382548	0.0472943	0.0611302	0.145346	0.0362336	0.0202312	0.0138218	0.0168068	0.0707689	0.0365721
GSM989953	71	0.0114148	0.0845407	0.0103315	0.00901293	0.0153809	0.0362167	0.0266832	0.089391	0.00610641	0.0199197	0.0243676	0.0192521	0.147129	0.0123035	0.079647	0.109146	0.0207936	0.0616308	0.0518469	0.0168804	0.0618251	0.0118814	0.0741465	0.00116841	0.00957772	0.0910002	0.0350262	0.0131929	0.0179645	0.0250124	0.0161702	0.035549	0.187242	0.119784	3.92796e-05	0.0630451	0.0270758	0.00838611	0.0327841	0.043806	0.080813	0.164059	0.0407176	0.0392975	0.0232255	0.0260767	0.0868895	0.0280522
GSM990002	71	0.010432	0.122937	0.00769777	0.00636582	0.0142501	0.0406787	0.0484012	0.0716034	0.0216482	0.0161061	0.0160576	0.00906125	0.102978	0.0129946	0.121469	0.067948	0.0449523	0.104373	0.0509362	0.0202774	0.0384203	0.006067	0.0416104	0.00717703	0.0116583	0.103211	0.0573294	0.0185242	0.0185833	0.0174444	0.0347596	0.0301281	0.110526	0.130455	0.0103761	0.047676	0.0310272	0.00605699	0.0466321	0.0432608	0.0667615	0.156561	0.0440395	0.0399652	0.0117563	0.0188407	0.0781452	0.0307268
GSM990025	71	0.00616444	0.0731224	0.00712712	0.00672901	0.0132862	0.0201425	0.0272473	0.0491915	0.0150106	0.0242271	0.00943321	0.011958	0.0971661	0.0141401	0.130113	0.0589041	0.0472554	0.0613037	0.0345576	0.0162727	0.0326872	5.53306e-05	0.019291	0.00664671	0.0082109	0.0798198	0.0491304	0.0159391	0.014166	0.0200174	0.0113269	0.0284112	0.121233	0.122468	0.0197624	0.0831286	0.0162288	5.53306e-05	0.0335373	0.0630546	0.0832309	0.158521	0.0317155	0.0324203	0.0073761	5.53306e-05	0.0885786	0.0210596
GSM990050	71	0.0168189	0.171868	0.0191349	0.00585769	0.0169431	0.0247679	0.0895719	0.103236	0.00624462	0.0330206	0.0307213	0.0132551	0.156263	0.0185747	0.180664	0.0620816	0.0369467	0.182433	0.0892865	0.0467148	0.0765304	0.00880045	0.025078	0.0274033	0.0179705	0.126463	0.0975198	0.0145061	0.0259008	0.0181839	0.0101377	0.0364431	0.194855	0.31907	0.0201815	0.106206	0.0561394	0.00401316	0.038211	0.0470018	0.076241	0.148299	0.178989	0.0640625	0.00989616	0.0161807	0.108013	0.0327554
GSM990051	71	0.00955053	0.0450092	0.00762778	0.00227472	0.0241203	0.0234651	0.0134848	0.0361602	0.0120844	0.00730032	0.0289245	0.00475657	0.0825696	0.0240275	0.0928186	0.0292112	0.0431162	0.0421751	0.0330364	0.00752194	0.15656	0.0140029	0.0214348	0.0140028	0.00484299	0.0561822	0.0292999	0.0114885	0.0184228	0.0346631	0.0159009	0.0222669	0.092721	0.00980838	0.0130578	0.0553868	0.00955238	0.00900337	0.0221178	0.0731365	0.0686202	0.116962	0.0253993	0.0125235	0.0125579	0.0127293	0.0478968	0.0355243
GSM990082	71	0.0145324	0.147517	0.014197	0.00747007	0.0165041	0.0299368	0.127208	0.102293	0.00125431	0.0230513	0.0600069	3.80416e-05	0.19816	0.0300081	0.234344	0.0839502	0.0368256	0.176321	0.0708342	0.0561154	0.0570783	0.00267231	0.00155599	0.0209409	0.0135774	0.173921	0.0521367	0.0162493	0.0664595	0.054252	0.00895243	0.0907762	0.222695	0.182292	0.00817012	0.151728	0.0999152	3.80416e-05	0.0427828	0.0512946	0.0683762	0.191563	0.17137	0.0489371	0.0105924	0.012243	0.134367	0.0416982
GSM990484	71	0.0133185	0.146636	0.00938197	0.00635907	0.0085826	0.0288128	0.0325335	0.0709652	0.00177083	0.0113492	0.0131789	0.0050736	0.0724346	0.0178861	0.149173	0.0341846	0.0283432	0.0951958	0.0198878	0.0169754	0.00309014	0.00182374	0.00197597	0.00965212	0.0185248	0.0688582	0.0321769	0.0126745	0.0176805	0.0121691	0.0157208	0.0278321	0.122069	0.0663301	0.0113967	0.0696652	0.0145412	0.00265662	0.0221006	0.0571704	0.0685732	0.143954	0.0271633	0.0285476	0.00509052	0.0147745	0.0571043	3.84284e-05
GSM990582	71	0.00384306	0.0605449	3.30078e-05	0.0113748	0.0150267	0.0303007	0.00913029	0.0657053	0.000506238	0.0110966	0.0111243	3.30078e-05	0.13764	0.0269244	0.198667	0.0463813	0.0361338	0.0849082	0.0263178	0.00510586	0.0412222	3.30078e-05	0.0106879	0.00773717	0.00283469	0.0612023	0.0455528	0.00860418	0.0110922	0.0195212	0.000398391	0.0181829	0.108911	0.154658	3.30078e-05	0.0511069	0.00780746	0.0016106	0.0177577	0.0376642	0.07799	0.147538	0.0306392	0.0134683	3.30078e-05	0.0154941	0.0483646	0.045298
GSM990590	71	2.5483e-05	0.0925567	0.00186064	0.0180974	0.0257805	0.0215993	0.0423009	0.110678	0.00388743	0.0319291	0.0101842	0.00503473	0.183611	0.0237401	0.225008	0.0862911	0.0287468	0.0972906	0.0300363	0.0266711	0.0386013	0.00811762	0.0140085	0.0207668	0.012523	0.141318	0.0470991	0.00715399	0.0262373	0.0140023	0.0131155	0.055336	0.147177	0.198225	2.5483e-05	0.0404431	0.0255677	0.00598191	0.0377535	0.0601595	0.0933183	0.141215	0.0480013	0.0433588	0.00775685	0.0138341	0.0609566	2.5483e-05
GSM990624	71	0.00270569	0.083883	0.00155282	3.19269e-05	0.0176513	0.0356048	0.0206623	0.061906	0.0230639	0.0078252	0.0277802	0.00858589	0.152323	0.0348034	0.137395	0.0301728	0.0402024	0.0608232	0.0299368	0.02198	0.0215159	0.0133772	0.0107117	0.0194485	0.000861577	0.0594665	0.0369026	0.00731341	0.0109789	0.0201971	0.0124032	0.0277648	0.0635656	0.141785	0.00161998	0.0743391	0.0145288	3.19269e-05	0.0176289	0.0485935	0.0746568	0.128912	0.0167586	0.0215786	0.0111992	3.19269e-05	0.0658682	0.0240162
GSM989925	70	0.00429777	0.051153	0.0016922	0.00723135	0.0182935	0.024288	0.011386	0.0457821	0.00979097	3.5555e-05	0.00256753	3.5555e-05	0.127352	0.00853902	0.113879	0.0188755	0.0248637	0.0725136	0.0407179	0.0173845	0.062105	3.5555e-05	0.00323055	0.00132841	0.011187	0.0659842	0.0233676	0.00946879	0.00898557	0.0287611	0.0215439	0.00648643	0.106515	0.13255	0.0176583	0.053044	0.0205551	0.000756186	0.0276865	0.0716091	0.0669308	0.144432	0.0569526	0.0250085	0.0120741	0.0112716	0.0541688	0.024498
GSM989957	70	0.00942387	0.0717486	0.00340475	0.0135588	0.0200476	0.0234593	0.0262214	0.0547074	0.0204078	0.0194599	0.0708632	0.0135823	0.0780276	0.021904	0.122164	0.0194367	0.0409794	0.0397264	0.0340221	0.000413621	0.0500286	0.00460744	0.0115546	0.0166863	0.011818	0.0712637	0.0398893	0.0146751	0.0161227	0.0428281	0.0135941	0.0229712	0.0775736	0.119346	0.00504628	0.037287	0.00443845	0.00270684	0.0549392	0.0605693	0.083486	0.144277	0.0588224	0.0162609	0.0143131	0.0165805	0.0658816	0.0388418
GSM990007	70	0.135437	0.132206	0.0107253	0.0120232	0.019541	0.02269	0.0295282	0.0765331	0.00897126	0.0221618	0.0274369	0.00270522	0.153815	0.0161208	0.155962	0.0632931	0.0398268	0.132377	0.051356	0.0172465	0.0532013	0.0114825	0.0437586	0.0180888	0.00648057	0.101074	0.0476976	0.0215924	0.0320358	0.0153467	0.0237626	0.0393792	0.142312	0.169534	0.0120847	0.0824361	0.0185793	0.0023252	0.0356477	0.0611307	0.0787551	0.17976	0.0602233	0.0467337	0.0109204	0.0144664	0.0992469	0.0213201
GSM990010	70	0.00546897	0.139849	0.00777496	0.00627919	0.0120374	0.00617957	0.0640682	0.0997641	4.15998e-05	0.013738	0.0499236	4.15998e-05	0.151455	0.0170588	0.110918	0.185239	0.0288869	0.154735	0.0549427	4.15998e-05	0.0547456	0.000690626	4.15998e-05	0.00328701	0.00126166	0.167259	0.058819	0.0111582	0.0247818	0.0233915	0.00700507	0.0233693	0.184834	0.24281	4.15998e-05	0.0818756	0.047307	4.15998e-05	0.0402765	0.0426531	0.0560118	0.193505	0.059598	0.0507235	0.00148178	0.0125452	0.11582	0.0142636
GSM990013	70	0.0112599	0.0992365	0.00693328	0.0126344	0.0148932	0.0236561	0.0360763	0.0382668	0.00568125	0.00291361	0.0240177	4.38241e-05	0.11833	0.0101449	0.147098	0.0443255	0.0350972	0.0766257	0.05084	0.0213703	0.067298	0.000187694	4.38241e-05	0.00874208	0.00772114	0.0824922	0.0411828	0.0181734	0.016218	0.0156966	0.00872347	0.0485661	0.10126	0.160005	4.38241e-05	0.0930019	0.024064	0.00182462	0.0457689	0.0461124	0.0734648	0.14046	0.0252835	0.0359005	4.38241e-05	0.00398338	0.0749773	0.0348
GSM990014	70	0.0102986	0.162177	0.0177174	0.0274575	0.0152108	0.026384	0.0583485	0.145739	0.00490779	0.0365048	0.0193375	0.00313862	0.18086	0.00499477	0.168549	0.056524	0.0431096	0.196464	0.0895755	0.057237	0.103022	0.00492585	4.04502e-05	4.04502e-05	0.0160312	0.153707	0.0794107	0.0156547	0.0550459	0.0116578	0.0151239	0.0490402	0.342395	0.408677	0.00093338	0.137314	0.054306	0.002067	0.106874	0.0445621	0.0785628	0.179986	0.0941464	0.119503	0.00142162	0.0180856	0.123434	0.0217969
GSM990032	70	0.00261298	0.183154	0.00142586	0.0168493	0.0144091	0.0222659	0.122608	0.0923549	0.00493337	0.026265	0.0246397	0.00599942	0.221379	0.0200462	0.141585	0.150955	0.0399335	0.25342	0.0555513	0.0376196	0.0874133	0.0167424	0.00019325	0.00293386	0.00183744	0.178886	0.0470259	0.0180307	0.0361567	0.0133998	0.0171477	0.0782718	0.212846	0.125626	4.17608e-05	0.145716	0.110218	4.17608e-05	0.0419561	0.066188	0.0740929	0.133255	0.0810841	0.0541628	4.17608e-05	0.021658	0.101884	0.0203296
GSM990056	70	0.0146965	0.127719	0.019888	0.0215125	0.0213662	0.0263824	0.0372121	0.0713937	0.0123732	0.0238047	0.0215795	0.011309	0.133822	0.0162115	0.0936397	0.106168	0.0366104	0.143019	0.0479503	0.0389847	0.0598017	0.0234178	0.00888186	0.0127713	0.00952598	0.116912	0.0371179	0.0220986	0.0291999	0.0302356	0.0182455	0.03834	0.163952	0.248582	0.0105761	0.0879377	0.03124	0.00565565	0.0324605	0.0728489	0.0738102	0.144371	0.0766587	0.0388715	0.00848802	0.0100106	0.0712631	0.0216322
GSM990104	70	0.00318739	0.0889257	0.00307618	0.0111827	0.0125591	0.0326418	0.0222204	0.068789	0.0077598	0.000660594	0.0285278	0.0130735	0.179477	0.0264676	0.113566	0.120248	0.0200888	0.138044	0.0525456	0.0549127	0.0686142	0.0121186	0.00600483	0.0236746	0.0175447	0.188571	0.0600369	0.015601	0.0268765	0.0440867	0.0170997	0.0742016	0.205635	0.275652	0.0192079	0.153499	0.0311688	4.92391e-05	0.0723194	0.0338691	0.0717804	0.15462	0.124492	0.0456265	0.00336942	0.0182283	0.0869335	0.0231592
GSM990402	70	0.00900465	0.0683936	4.08759e-05	4.08759e-05	0.00652831	0.0155856	4.08759e-05	0.065963	0.00215937	0.00613604	0.0544157	4.08759e-05	0.118162	0.0109069	0.0986192	0.0947926	0.0159792	0.0346092	0.0105172	4.08759e-05	0.0439258	0.000578512	0.0823476	4.08759e-05	0.00737688	0.0806504	0.0348693	0.00123328	0.0183197	0.0095962	0.00807567	0.021664	0.086539	0.0811491	0.00152252	0.0616641	0.0208154	0.00247352	0.0153049	0.0478779	0.0786669	0.131455	0.0236264	0.0116921	4.08759e-05	0.0127271	0.0414557	0.0117529
GSM990462	70	0.0054778	0.0561936	0.0103544	0.0113665	0.0116571	0.0106917	0.0185314	0.0412766	0.000275555	0.00712865	0.0124228	0.012334	0.0895539	0.0212867	0.173346	0.0303999	0.0157239	0.0644628	0.0140887	0.00630707	0.0331513	2.51868e-05	0.00470838	0.00904145	0.00396632	0.0691456	0.0230795	0.0139389	0.0127385	0.0178143	0.0207056	0.0139124	0.0611842	0.143683	0.00963158	0.0428697	0.0176248	0.00340204	0.0223868	0.0423357	0.0762841	0.134494	0.0140577	0.0185258	0.0035747	0.00585103	0.048827	0.0134589
GSM990607	70	0.0134714	0.0782124	4.53538e-05	0.00833977	0.0314429	0.0347785	0.00397553	0.0588707	0.020134	0.0242633	0.0257322	4.53538e-05	0.132363	0.0320813	0.215018	0.141783	0.02585	0.0743614	0.0358779	0.0206233	0.0699641	4.53538e-05	0.00109037	0.0215162	0.00813578	0.0646935	0.0461502	0.0109949	0.0151948	0.0155306	0.0194306	0.0168287	0.0672238	0.0989488	0.0104556	0.0401605	0.0296329	0.000826199	0.0340013	0.0453942	0.0949388	0.129956	0.0308246	0.031886	4.53538e-05	0.0213114	0.0740734	0.0070064
GSM990614	70	0.0126765	0.0712849	2.838e-05	0.0116411	0.0182095	0.0273212	2.838e-05	0.0577831	0.00690017	0.011529	0.00812823	0.00670401	0.121999	0.0216493	0.15079	0.0177977	0.0335856	0.0376062	0.0285983	0.0139828	0.0460525	0.00296518	2.838e-05	2.838e-05	0.00817994	0.0489488	0.0454628	0.00933179	0.0146856	0.011982	0.0107413	0.0105661	0.078364	0.0837997	0.00250103	0.0594526	0.0103087	0.00953278	0.0224817	0.0511359	0.0765368	0.132305	0.0187	0.0162453	0.00342959	0.0105494	0.0502507	0.0129541
GSM990621	70	0.00791056	0.109235	3.07009e-05	0.00558901	0.0180849	0.033653	0.0398199	0.0798908	0.000299068	0.013761	0.0123481	0.00290572	0.113018	0.0151644	0.12536	0.0357802	0.031286	0.083922	0.021092	0.00285403	0.0482332	0.000250414	0.0643213	0.010847	0.00964937	0.0663599	0.0388656	0.0152777	0.0218334	0.0144892	0.0088416	0.0225021	0.135823	0.152272	3.07009e-05	0.0544859	0.0149788	0.00248718	0.0337739	0.0456752	0.0803264	0.139487	0.0551246	0.0276323	0.00606041	0.0144037	0.0731053	0.0118355
GSM989895	69	0.00964756	0.0642689	0.00752469	0.00865037	0.0238859	0.0239577	0.0115652	0.0562589	0.00619867	0.00976875	0.0110474	0.00306067	0.0917325	0.0207496	0.155621	0.0314603	0.0319354	0.0637853	0.0204325	0.0171064	0.0601151	0.0107106	0.000741792	0.0139024	0.00444726	0.0542954	0.0360947	0.0165466	0.0165711	0.0154906	0.018459	0.0192951	0.0692622	0.120498	0.01464	0.0430249	0.00796076	3.65938e-05	0.0434819	0.0420139	0.0662888	0.135468	0.0266004	0.0125587	0.00678017	0.00835279	0.0654957	0.0421586
GSM989918	69	0.00393031	0.116573	0.00516691	0.0215593	0.0215874	0.0203439	0.0517014	0.121905	3.87686e-05	0.0311701	0.0531296	0.00388739	0.150449	0.0106516	0.146181	0.0576721	0.0380642	0.104386	0.0416898	0.0260605	0.0464065	0.000885567	0.0631311	0.00463549	0.0145541	0.123612	0.0849328	0.0209304	0.0243092	0.0203461	0.0111433	0.0471835	0.215758	0.275554	0.0183597	0.0811287	0.0359427	3.87686e-05	0.0289004	0.0516078	0.0772486	0.15782	0.10004	0.0494088	0.00510431	0.0155768	0.0993976	0.0295346
GSM989932	69	0.00579054	0.150291	0.00460324	0.0236567	0.0291789	0.0265413	0.128297	0.0711677	0.00204568	0.0307238	0.0563666	0.00469953	0.153849	0.0185834	0.116939	0.159422	0.0344883	0.161289	0.0615181	0.0430391	0.0699303	0.00910383	0.00516825	0.0216226	0.0127532	0.145949	0.058784	0.00628914	0.0478195	0.0238464	0.0129691	0.0561877	0.18772	0.253343	0.0122965	0.105773	0.0475454	0.00408569	0.0574155	0.0593445	0.0728084	0.163434	0.225149	0.0485413	0.0136428	0.0143451	0.0828858	0.0410643
GSM989959	69	0.00973422	0.144658	0.00692278	0.0535613	0.0180524	0.0248089	0.0812698	0.0640902	0.00996699	0.0320165	0.0580417	0.00948355	0.176852	0.0193833	0.127523	0.0563836	0.025164	0.229227	0.064668	0.020285	0.0758456	0.0101601	0.0180431	0.0187262	0.0103135	0.128174	0.0613369	0.0087686	0.0299847	0.0333489	0.0200111	0.0476968	0.201247	0.228585	0.00401254	0.127287	0.0543978	3.19745e-05	0.0398592	0.0084317	0.0795872	0.200684	0.0868778	0.0504406	0.0103332	0.0137025	0.101876	0.0282859
GSM989973	69	0.00905665	0.0756421	0.000399312	0.0049767	0.0236507	0.0245582	0.0251302	0.0561323	0.0192427	0.0206494	0.0309537	0.00275751	0.0986363	0.026202	0.132819	0.0586681	0.0362847	0.0827583	0.0443262	0.0191087	0.0606233	0.0155095	0.00198716	0.0172801	0.014419	0.111237	0.078265	0.0143112	0.0239538	0.0301963	0.0155172	0.032001	0.111272	0.104416	0.000651482	0.0753998	0.0105029	3.72832e-05	0.040008	0.0600113	0.056856	0.151797	0.0542469	0.0313234	0.00195758	0.0185017	0.0703688	0.0357698
GSM990035	69	0.00579044	0.126821	0.0017622	0.0177814	0.0157045	0.0207306	0.0575116	0.0650777	0.00283866	0.00524368	0.0417077	3.92767e-05	0.136017	0.0112707	0.114979	0.0515806	0.0256485	0.16355	0.0485998	0.0205269	0.0514507	0.00349419	3.92767e-05	0.00224223	0.00179836	0.115507	0.0352578	0.0154637	0.0201294	0.0174792	0.00979311	0.0436102	0.187382	0.251632	0.00279343	0.117548	0.0247646	3.92767e-05	0.0411556	0.0452786	0.0770982	0.17641	0.0796266	0.0542161	3.92767e-05	0.0101974	0.118327	0.0161928
GSM990041	69	0.00567851	0.0559413	0.00424282	0.00282622	0.0142948	0.017044	0.000164007	0.0403576	0.00889749	0.00265492	0.00981284	0.00637192	0.0791408	0.00771148	0.0959245	0.0502382	0.0321153	0.0828055	0.0204676	4.04178e-05	0.0449309	4.04178e-05	4.04178e-05	0.0144046	0.00363506	0.0697254	0.0365175	0.0104459	0.0170766	0.0153765	0.00763105	0.0270297	0.0859384	0.0951764	0.0123626	0.043445	0.0271336	4.04178e-05	0.0184802	0.0303286	0.084549	0.11941	0.0185131	0.0266884	0.00276293	0.00961804	0.0572711	0.0159828
GSM990046	69	0.0109636	0.0705921	0.000490724	9.15875e-06	0.0162634	0.0210626	0.0129659	0.0627451	9.15875e-06	9.15875e-06	0.0166576	9.15875e-06	0.102231	0.0109068	0.133905	0.0319072	0.0328658	0.0559601	0.0211822	0.0085989	0.0458414	0.000223596	0.0016148	9.15875e-06	0.00712885	0.0468761	0.0369634	0.0159662	0.0132148	0.0101088	0.00979954	0.0121288	0.0850876	0.110995	0.00560114	0.0343244	0.0116476	0.000417869	0.0148375	0.0671542	0.0691227	0.12476	0.0196758	0.01605	9.15875e-06	6.30555e-05	0.0503897	9.15875e-06
GSM990048	69	0.0084731	0.0437852	0.00141696	4.19054e-05	0.0116026	0.0109451	4.19054e-05	0.0336432	0.00730728	0.00496605	0.0110367	4.19054e-05	0.101021	0.00721104	0.165757	0.0205166	0.0332283	0.0330787	0.0375605	4.19054e-05	0.0449334	0.00113263	4.19054e-05	0.00183424	0.0121886	0.0555624	0.0482449	4.19054e-05	0.00855207	0.0122863	0.0172637	0.0184165	0.0854561	0.0901738	4.19054e-05	0.0320947	0.00964906	4.19054e-05	0.010468	0.0535665	0.0787135	0.126868	0.0112061	0.027539	4.19054e-05	0.00719021	0.0540159	0.0173814
GSM990058	69	0.0146681	0.103726	0.00974293	0.00612241	0.0190079	0.0224548	0.0321449	0.0538122	0.0179493	0.0213271	0.0167022	0.0146843	0.136268	0.0281841	0.152217	0.0729945	0.0464261	0.0796139	0.046368	0.0105094	0.0476936	0.00543169	0.00560597	0.00916038	0.0137491	0.0802069	0.039583	0.0247261	0.0267401	0.0283694	0.0160725	0.0379094	0.13212	0.203053	0.0238647	0.158121	0.0369323	0.00738003	0.0414696	0.0437222	0.0872269	0.140344	0.0584604	0.0327305	0.00669081	0.0157933	0.0625987	0.0168339
GSM990408	69	0.00383471	0.053507	0.00348702	0.00733692	3.40882e-05	0.0225871	0.00177895	0.0307065	0.000830123	0.00820984	0.0147298	0.00865376	0.0954358	0.0185606	0.124378	0.0600703	0.0209322	0.0352422	0.0211521	0.00429087	0.0133107	0.0038028	6.45222e-05	0.00291075	0.00697792	0.0475459	0.0326882	0.0108734	0.0116165	0.0110005	0.00262372	0.0122367	0.0591039	0.0418042	3.40882e-05	0.0598877	0.00173638	3.40882e-05	0.0161576	0.0419118	0.0830846	0.120468	0.0148601	0.00850654	0.00315384	0.010605	0.0504925	0.0323702
GSM990418	69	5.07584e-05	0.0681968	5.07584e-05	0.00684898	0.00743127	0.0177275	0.0548818	0.0510766	0.00378679	0.00685963	0.0250873	0.0102266	0.0889734	0.0231401	0.120661	0.0985084	0.0220076	0.121168	0.0297788	0.010651	0.019626	5.07584e-05	5.07584e-05	5.07584e-05	0.00236448	0.146717	0.0374326	0.0122287	0.0290906	0.020858	0.0193807	0.0113407	0.0703915	0.101415	5.07584e-05	0.0304563	0.0317568	0.000991875	0.00975505	0.0291507	0.0806608	0.123837	0.0448742	0.00605671	5.07584e-05	0.00903994	0.0389354	0.0106354
GSM990453	69	0.00358036	0.11029	0.00321624	0.0251643	0.0101839	0.0226682	0.0151685	0.0837554	0.00521541	0.0128753	0.058152	0.00750068	0.147831	0.0258296	0.185169	0.0323355	0.0136826	0.147402	0.0453709	0.024044	0.0384753	0.00311971	0.016774	0.0050858	2.53951e-05	0.0880298	0.0413562	0.00961542	0.0197734	0.032301	0.0189651	0.0270492	0.187212	0.0880419	2.53951e-05	0.146178	0.0538841	0.0070202	0.00867551	0.0481187	0.0662765	0.174959	0.106297	0.0351406	0.00472429	0.00810156	0.0880706	0.0110853
GSM990468	69	0.00391856	0.0816163	0.00324713	0.0177738	0.0188297	0.0209779	0.057681	0.0793824	0.00493603	0.00435339	0.0172075	0.0115729	0.143405	0.0195773	0.208602	0.0523953	0.0218412	0.0718536	0.043164	0.00873878	0.0620695	0.00503299	0.00106064	0.00661294	0.00498349	0.102432	0.0240141	0.0131223	0.0302259	0.0157461	0.019905	0.0277061	0.169923	0.0918298	0.0077458	0.105396	0.0172728	0.00203838	0.026774	0.046545	0.0705444	0.127731	0.0263422	0.0254526	0.00723918	0.00721911	0.0695496	0.0156363
GSM990475	69	0.00131341	0.039429	2.61727e-05	0.00535356	0.0108229	0.0235845	0.00767356	0.0299128	0.00677232	0.00273729	0.0232042	2.61727e-05	0.0894419	0.0202827	0.134181	0.0342011	0.0157141	0.0435397	0.0210826	0.0152035	0.0389257	0.0150597	2.61727e-05	0.00149889	0.00282451	0.0392471	0.0206154	0.0159503	0.0201216	0.0197377	0.0273717	0.0215554	0.0638789	0.0629144	0.00651646	0.0411502	0.0170939	0.00486008	0.0289739	0.0408029	0.0611171	0.117749	0.0139751	0.020458	0.0031527	0.0076331	0.0341499	0.017349
GSM990477	69	0.00407673	0.128789	0.00102937	0.0275593	0.0113608	0.0266731	0.0364258	0.096985	0.00659113	2.64096e-05	0.0102057	0.00808993	0.111384	0.0166328	0.10742	0.106976	0.0161568	0.186381	0.0407611	0.0222456	0.0323839	0.00669029	0.00368303	0.0190621	0.00856318	0.0833804	0.0280765	0.0113849	0.0164221	0.00976098	0.0107535	0.0235446	0.125068	0.160519	0.00685826	0.142851	0.0194525	2.64096e-05	0.065894	0.043876	0.070132	0.143934	0.0783875	0.0513194	0.00291713	0.0102296	0.105579	0.0103945
GSM990508	69	0.00875823	0.139024	0.0102392	0.0154466	0.0226935	0.0187548	0.0209494	0.107475	0.0086394	0.0403312	0.0283637	2.13969e-05	0.194704	0.0111592	0.161717	0.0847449	0.0216528	0.0938169	0.0550412	0.0325188	0.0308818	0.00326834	0.0259787	0.0033429	0.00106273	0.172712	0.033499	0.0148827	0.0232521	0.0242604	0.00957022	0.0417829	0.153854	0.194814	0.104278	0.105844	0.0330238	2.13969e-05	0.0512336	0.0549837	0.0594568	0.145704	0.0226297	0.0301573	2.13969e-05	0.0135758	0.0632161	0.0111211
GSM990524	69	0.0072095	0.104436	0.0224629	0.0116214	0.00689899	0.0221454	0.119118	0.0581217	0.00216171	0.034926	0.0234923	0.00257976	0.12537	0.0146343	0.0998341	0.0310646	0.035602	0.142396	0.0429241	0.0256895	0.0483134	0.013881	0.0138558	0.011882	0.0110399	0.0952886	0.0539765	0.0146017	0.0170696	0.0122544	0.01208	0.0511862	0.14064	0.14402	0.0277734	0.0912586	0.0441258	0.00285931	0.0376826	0.0286964	0.0886188	0.128688	0.107523	0.046327	3.8911e-05	0.00355022	0.0677687	0.0162077
GSM990545	69	4.72918e-05	0.0635406	0.00733943	0.0168182	0.011579	0.0216907	0.0250129	0.0826108	0.0116492	0.0109176	0.0177069	0.0083057	0.152374	0.0258474	0.138314	0.068961	0.0274957	0.0906354	0.0460864	0.00692547	0.0533626	0.0214461	2.95995e-05	0.00983756	0.00883875	0.0420528	0.0418146	0.00785086	0.00950972	0.0206105	2.95995e-05	0.0150234	0.0678073	0.128957	2.95995e-05	0.0471386	0.0134672	2.95995e-05	0.0420986	0.0455257	0.0648781	0.112166	0.0674412	0.0138132	2.95995e-05	0.00342758	0.0927133	0.0227809
GSM990570	69	0.00849624	0.047466	3.48733e-05	0.00220529	0.0231612	0.0333574	0.0231856	0.0942444	3.48733e-05	0.00548794	0.0128074	0.00380914	0.133506	0.0282708	0.0752981	0.0526875	0.035369	0.0734263	0.0262137	0.0153002	0.0427609	0.0021192	0.0111107	0.0116272	0.00259921	0.0544155	0.030857	0.00385589	0.0140895	0.011764	0.018316	0.0275866	0.125113	0.161598	3.48733e-05	0.0467337	0.0116556	0.00423351	0.0366235	0.0509662	0.0791714	0.147224	0.0277957	0.0254096	3.48733e-05	0.00739882	0.0653881	0.0234148
GSM990604	69	0.00176501	0.0880096	0.00225864	0.00137572	0.0134914	0.0396758	0.00865059	0.0499106	0.00771831	0.000127473	0.0070445	0.0254122	0.143092	0.0257716	0.102361	0.0408353	0.0261544	0.0538759	0.0226347	0.0152628	0.0408554	3.6692e-05	0.00394511	0.00964966	0.0135195	0.0409783	0.0432952	0.010176	0.0190249	0.0199454	0.0109184	0.019727	0.0683289	0.113329	3.6692e-05	0.0512905	0.0233599	3.6692e-05	0.0234727	0.0578268	0.0708071	0.11737	0.0135375	0.0205478	0.00387507	0.000276041	0.0866482	0.0211506
GSM990611	69	3.00916e-05	0.111809	0.00583449	3.00916e-05	0.0070374	0.0263642	0.0275049	0.0796659	3.00916e-05	0.0315125	0.0395744	3.00916e-05	0.17195	0.0258489	0.174875	0.0833206	0.0149849	0.182865	0.0357074	0.0209097	0.0512644	3.00916e-05	0.0436338	0.0107566	0.0136241	0.073657	0.0211004	0.0170915	0.030264	0.00554342	0.0189541	0.0432248	0.165087	0.163721	3.00916e-05	0.0993095	0.0677267	0.00243867	0.0343165	0.041707	0.0915932	0.153389	0.0585312	0.0289611	0.00355877	0.0075023	0.0916421	0.0233541
GSM990617	69	0.00183153	0.18578	0.00496492	0.00921289	0.010736	0.0162406	0.14837	0.0971629	2.87885e-05	0.0234079	0.0136357	0.00501007	0.183555	0.0143833	0.113343	0.104914	0.0293534	0.167863	0.0484153	0.0337393	0.0665447	2.87885e-05	0.00269868	2.87885e-05	0.00550487	0.138216	0.0817724	0.00672492	0.0168417	0.0134805	0.00495406	0.0742546	0.176596	0.30438	0.0233612	0.112863	0.0559233	2.87885e-05	0.0528829	0.0193272	0.0801966	0.130423	0.0919355	0.0636632	0.00271958	0.00829176	0.105085	0.0134593
GSM989843	68	0.00954467	0.112764	0.0053137	0.00370513	0.023821	0.0242555	0.0321848	0.0746587	0.00529064	0.0112276	0.020312	3.77226e-05	0.137749	0.0135278	0.088559	0.0895948	0.0355083	0.0957697	0.0602283	0.00506065	0.0745662	0.00312663	0.0518276	0.0183239	0.0058128	0.0823591	0.0388758	0.0116758	0.0262292	0.0285211	0.00639724	0.0637794	0.169754	0.068299	0.0244352	0.0646361	0.0215966	3.77226e-05	0.0542589	0.0529996	0.0734039	0.142144	0.0363727	0.0304387	0.0139316	0.019256	0.0675946	0.0372942
GSM989848	68	0.00528499	0.065741	0.00781088	0.00660856	0.025105	0.0244794	0.0218058	0.0591539	0.0124012	3.59816e-05	0.0268667	0.00228657	0.0937849	0.0177766	0.123529	0.0371971	0.0426361	0.039838	0.029734	0.00471768	0.0610161	0.0223219	0.00825183	0.0135025	0.0137315	0.05179	0.0362486	0.00696052	0.0239982	0.0189569	0.00906514	0.020746	0.0646499	0.157566	3.59816e-05	0.0806483	0.0083415	0.00663674	0.0302219	0.0460301	0.0846074	0.131118	0.0319285	0.0195854	3.59816e-05	0.0094791	0.0813685	0.0418649
GSM989891	68	0.00898461	0.102325	0.0101652	0.0114088	0.0264404	0.0225305	0.0510554	0.080377	0.00640129	0.00758543	0.0314646	0.0142704	0.22878	0.0134184	0.183358	0.0679661	0.0303393	0.102314	0.074798	0.024382	0.0585302	0.00475817	0.034813	0.0188589	0.0101876	0.130157	0.0832713	0.025801	0.0362566	0.025678	0.00313262	0.0322208	0.170331	0.110706	0.0298328	0.0697847	0.0285222	0.00382979	0.0691232	0.0680813	0.0857579	0.181104	0.0831201	0.0360889	0.0166736	0.0175471	0.082585	0.0451038
GSM989903	68	0.00423526	0.044167	0.0143592	0.00422129	0.0359918	0.0247421	0.0124524	0.0625418	0.0060398	0.0113063	0.0136619	0.0114676	0.0972387	0.0149011	0.107096	0.0291648	0.0363939	0.041812	0.0377078	0.00560849	0.0387186	0.0157468	0.0233509	0.0153706	0.00787901	0.026461	0.0410792	0.0186681	0.0173984	0.016757	0.0182128	0.018287	0.0696397	0.127566	0.00724234	0.0492697	0.00374572	0.000866647	0.0446361	0.057736	0.0873394	0.136551	0.020082	0.0148103	0.00160193	0.0200451	0.0725763	0.0474706
GSM989927	68	0.00538242	0.153923	0.00695872	4.36727e-05	0.0106226	0.0180312	0.0344558	0.0665216	4.36727e-05	0.00475508	0.0304781	0.00964405	0.164983	0.0264326	0.160608	0.0584717	0.0307719	0.0984765	0.0524341	0.0216413	0.0618762	4.36727e-05	0.0103773	4.36727e-05	0.00801206	0.0936414	0.0489145	0.0118854	0.0172332	0.0109289	4.36727e-05	0.0313124	0.146771	0.159216	4.36727e-05	0.0488041	0.0314512	4.36727e-05	0.0266492	0.0594015	0.0555385	0.112284	0.0704227	0.0395855	0.00317581	4.36727e-05	0.0772149	0.0158085
GSM989941	68	0.014031	0.0896247	0.00221913	0.0211252	0.0161139	0.0226372	0.034598	0.0752121	0.00186783	0.00819216	0.0176136	0.0063827	0.108249	0.0124508	0.185635	0.0782412	0.0283261	0.114142	0.0394412	0.0134666	0.0646065	0.0111636	0.00362598	0.00681807	0.00296119	0.104009	0.0474241	0.0149114	0.0194017	0.0169994	0.0239708	0.0285216	0.13942	0.227011	3.25796e-05	0.0682685	0.00897822	3.25796e-05	0.0289291	0.0518097	0.0708084	0.155495	0.0466165	0.0418074	0.000604782	0.0180226	0.0719516	0.0260188
GSM990030	68	0.00692456	0.083759	0.0115039	0.0329828	0.010526	0.0215144	0.116464	0.0686841	0.00708093	0.0214806	0.0244942	0.0156112	0.1469	0.0174093	0.151106	0.0344933	0.0254503	0.132989	0.0391193	0.00834342	0.0607086	0.00030346	0.0386208	4.3637e-05	0.0064098	0.122016	0.0338743	0.0109964	0.0147813	0.0260427	0.00850675	0.0245385	0.122802	0.255191	0.00152357	0.0809336	0.0257654	4.3637e-05	0.0344309	0.0477837	0.0778007	0.173339	0.123247	0.0324897	0.00126344	0.0107624	0.0763073	0.0141636
GSM990045	68	0.00976594	0.19727	0.0104081	0.0257524	0.0143266	0.0216554	0.204195	0.138839	0.00210901	0.0904188	0.0331321	0.00860226	0.222017	0.0179713	0.144615	0.178776	0.0382871	0.216926	0.0916727	0.0413586	0.0769516	0.00188414	0.163281	0.0275408	0.00416104	0.221485	0.0858527	0.0087076	0.0330181	0.0277965	0.0129085	0.0915227	0.255876	0.3371	0.0370746	0.190246	0.0749048	2.19339e-05	0.0758645	0.0374172	0.0672043	0.168976	0.191544	0.109034	0.00420916	0.0143951	0.184473	0.0278299
GSM990087	68	0.00910138	0.18855	0.00973508	0.022975	0.0184926	0.0162352	0.121719	0.100044	0.00525997	0.0284351	0.119806	0.00543842	0.130373	0.0200282	0.162121	0.0680714	0.0140364	0.22137	0.0714269	0.0207831	0.101124	0.00820153	0.00449944	0.0139848	0.015812	0.202679	0.088867	0.0244777	0.0276455	0.0366568	0.00865036	0.059803	0.232075	0.217558	0.0355795	0.152559	0.028466	0.00441414	0.0780549	0.0476305	0.0711749	0.154694	0.0749953	0.0528289	0.0133541	0.0171459	0.10305	0.0284931
GSM990424	68	0.00280428	0.146608	4.61609e-05	0.0167736	0.00441541	0.0145672	0.0653873	0.103345	0.00781001	0.012165	0.037007	4.61609e-05	0.203475	0.0205815	0.15376	0.0659749	0.0163538	0.188628	0.0413391	0.0157644	0.0903932	0.00782728	0.00303068	0.0114089	0.00476788	0.136861	0.0397033	0.00955603	0.020232	0.0322352	0.00932128	0.0364668	0.19076	0.174275	4.61609e-05	0.108274	0.0310448	4.61609e-05	0.0526074	0.0389504	0.113214	0.175692	0.0879848	0.0477517	4.61609e-05	0.00594451	0.0619217	0.0053334
GSM990425	68	0.00611913	0.0816527	0.00607857	0.00207697	0.00632363	0.0186144	0.0181163	0.0906377	0.00941301	0.000459685	0.0248094	0.000304611	0.0864013	0.0188553	0.138169	0.024886	0.0113606	0.0702357	0.0367071	0.0126403	0.053915	0.00793177	0.0553171	3.91334e-05	0.0101448	0.0256811	0.0333006	0.0142628	0.0167349	0.0223576	0.00530521	0.0266253	0.0724781	0.155922	3.91334e-05	0.0971914	0.00923768	0.000437904	0.0133064	0.0376208	0.0667858	0.113493	0.0546807	0.0133315	0.0137306	0.00320425	0.0280867	0.0217552
GSM990447	68	0.00565068	0.143667	0.0385818	0.0230243	0.00565177	0.00940111	0.182387	0.147816	0.00274717	0.0412477	0.0292176	2.7044e-05	0.19457	0.0207262	0.15195	0.0974334	0.033176	0.191959	0.0897127	0.0273668	0.0442161	0.00372135	2.7044e-05	0.00986189	0.010643	0.12212	0.128596	0.0205873	0.0802933	0.0326535	0.0234362	0.0259713	0.332357	0.0994139	0.0569457	0.183671	0.112753	0.00407551	0.0272029	0.0648954	0.0644819	0.251368	0.0691256	0.0358832	0.00558565	0.00758294	0.122609	0.007287
GSM990488	68	0.00663745	0.127708	0.00934179	0.00291194	0.00945174	0.018532	0.0509959	0.0933702	0.0100649	0.0056506	0.0658679	0.0038243	0.169735	0.0229025	0.168284	0.066116	0.0346763	0.148223	0.0605815	0.00951269	0.0401363	0.0109365	0.0121639	0.0121516	0.00763	0.129005	0.0903775	0.0208946	0.0170242	0.0408318	0.0112038	0.0446888	0.157878	0.183557	0.0238973	0.111663	0.0403759	5.92717e-05	0.0254657	0.0364882	0.080189	0.133589	0.135566	0.0426323	0.00525065	0.0125044	0.0829988	0.00852476
GSM990491	68	0.00313235	0.164893	0.00242312	0.0216653	0.010967	0.0151738	0.163539	0.114089	0.0119523	0.0415077	0.0325655	0.0057635	0.23944	0.0189566	0.192535	0.157926	0.0195854	0.244263	0.0750359	0.035448	0.0625181	0.0179711	0.00837544	3.94433e-05	0.0197355	0.191407	0.0866293	0.0241888	0.0247184	0.0255774	0.00823253	0.0729733	0.28553	0.0658671	0.0285946	0.209076	0.0459589	0.00214818	0.0704477	0.0356025	0.0700809	0.185335	0.106044	0.107556	0.00266668	0.0273202	0.155652	0.0157519
GSM990496	68	0.00944078	0.061991	0.00500109	0.00937433	0.00975783	0.0212478	0.0552702	0.108372	0.000375365	0.00307146	0.011291	0.00548039	0.147156	0.0120702	0.130319	0.162205	0.019313	0.12057	0.0606601	0.0270648	0.0639911	0.00232506	0.0720907	4.23395e-05	0.0116491	0.0832169	0.0579061	0.0193649	0.0276489	0.00546349	0.00823226	0.0285013	0.142757	0.153497	0.00790777	0.0819994	0.0160027	0.00248493	0.0230436	0.0445155	0.0637657	0.142845	0.118799	0.0344433	0.00957451	0.0099964	0.076718	0.0118265
GSM990625	68	0.00706897	0.105677	0.00123728	3.34006e-05	0.0154331	0.0297269	0.0135678	0.0861468	3.34006e-05	3.34006e-05	0.00417569	0.00766311	0.105109	0.0255658	0.250133	0.0601363	0.0210455	0.0917182	0.222104	0.00022779	0.0554317	3.34006e-05	0.0107972	0.0105147	0.00224462	0.0605518	0.0297581	0.00325751	0.0216697	0.0102205	0.0174167	0.00792679	0.0957587	0.133527	0.00176845	0.0404544	0.0294268	3.34006e-05	0.0199601	0.0421428	0.0802412	0.120563	0.0252888	0.0146076	3.34006e-05	0.000747025	0.057286	0.0116347
GSM989827	67	0.00820513	0.0724303	0.00849878	0.016057	0.0281734	0.0285421	0.020531	0.0437233	0.00805276	0.01162	0.0312382	0.00984526	0.100366	0.0186521	0.0856621	0.059999	0.0376399	0.0200767	0.028488	0.0109812	0.0367269	0.0208981	0.0236703	0.016083	0.0123921	0.0456741	0.0354046	0.0185189	0.0216458	0.0270534	0.0140613	0.0163746	0.0621754	0.0952366	0.0117101	0.0416199	0.0193643	0.00577808	0.0346012	0.0451823	0.0763374	0.136246	0.0364844	0.0297729	0.0121326	0.0193281	0.0898265	0.0528441
GSM989878	67	0.00867636	0.0526085	0.0158427	0.00451532	0.0193359	0.0177784	0.0285322	0.0432008	0.00596723	0.0133166	0.0364194	0.00153766	0.0995236	0.0213573	0.16381	0.0377618	0.028569	0.0339883	0.0482183	0.01276	0.0357439	0.00982699	0.00220884	0.00744537	0.0114318	0.0424074	0.049702	0.0156407	0.0263327	0.0191515	0.0155178	0.030194	0.0900598	0.091826	0.0135572	0.0470123	0.00214066	0.00350339	0.0188842	0.0478833	0.0791508	0.148901	0.0151485	0.020295	0.00931211	0.0176218	0.0576549	0.00775746
GSM989954	67	0.00201581	0.0541124	0.000572264	0.00742527	0.0216397	0.0218523	0.0131476	0.024181	0.0229851	3.76553e-05	0.0126411	0.00485052	0.0717203	0.0193698	0.161912	0.0553153	0.0239899	0.0346538	0.0232947	0.00976182	0.0366458	0.0113138	0.000786083	0.00711753	0.00293095	0.0366371	0.0200098	0.0168013	0.0109092	0.0236691	0.00879215	0.0198532	0.061511	0.084542	0.012576	0.0437196	0.0115048	0.00525399	0.030392	0.0381061	0.0874002	0.132217	0.0301983	0.0143247	0.000208814	0.0189756	0.0691255	0.0193157
GSM990004	67	0.0122532	0.15954	0.0160864	0.0140652	0.0187883	0.0256214	0.20709	0.148597	0.0151772	0.0153408	0.0325599	0.00542263	0.182233	0.0199492	0.156928	0.0679851	0.0400905	0.160937	0.0575434	0.0278063	0.0831609	0.00310344	0.0413746	0.00361543	0.010581	0.14641	0.085046	0.0174606	0.0323951	0.0280233	0.0159517	0.0685128	0.199982	0.286257	0.0353435	0.128494	0.0532844	0.00798161	0.0615541	0.0527542	0.0802295	0.166892	0.130308	0.0560988	0.00261089	0.00746944	0.111962	0.0254484
GSM990008	67	0.0100293	0.14036	0.00869302	0.0071971	0.0146866	0.027606	0.0435234	0.103833	0.0132906	0.0177947	0.0260246	0.00389258	0.146596	0.0152028	0.191257	0.123564	0.0397497	0.126933	0.0882927	0.0218403	0.0696158	0.0100656	0.010357	0.0026982	0.0120868	0.15077	0.0754034	0.00663608	0.033371	0.0187966	0.0197856	0.0298585	0.172921	0.250209	0.00619072	0.0834541	0.0496316	0.00292609	0.0304827	0.0531993	0.0756848	0.162332	0.0746715	0.054125	0.00209594	0.0057206	0.0903256	0.0279315
GSM990012	67	0.012376	0.120508	0.0183021	0.0102303	0.0200421	0.0254496	0.0329631	0.088475	3.1817e-05	0.00595522	0.0186083	3.1817e-05	0.120062	0.015591	0.124138	0.0726446	0.0352935	0.136031	0.0616751	0.0307776	0.0669464	0.0144458	0.00372791	0.00712615	0.00912464	0.11582	0.047371	0.0122272	0.0250206	0.020799	0.00817909	0.0191447	0.167186	0.184663	0.015492	0.0579729	0.0257452	3.1817e-05	0.0451107	0.0478789	0.0766457	0.153876	0.0642315	0.0577972	0.00509854	0.00684815	0.0939774	0.0256128
GSM990068	67	0.0106669	0.126294	0.0131543	0.0116742	0.0152288	0.0256199	0.0697147	0.0839783	0.00762535	0.0279039	0.0301942	0.014715	0.200359	0.0195491	0.174504	0.0496721	0.0121214	0.0928257	0.050804	0.0385387	0.0668886	0.0019278	0.00869371	0.0215447	0.0185873	0.117041	0.0579563	0.0102651	0.019558	0.0270093	0.017786	0.0445149	0.17941	0.290527	0.00866772	0.110672	0.0486345	0.00895094	0.0695796	0.0624741	0.0785776	0.169666	0.101453	0.0233561	0.00349175	0.0251494	0.107231	0.0260961
GSM990337	67	0.00615474	0.065163	0.0235967	0.0012295	0.00796872	0.0221447	0.0700262	0.124289	0.00625719	0.00818546	0.0101784	0.010851	0.0915975	0.0146966	0.167063	0.0668133	0.0308381	0.0709775	0.0499124	0.0395641	0.0597121	0.00735468	0.00378259	0.00565567	0.00808403	0.0762003	0.116269	0.0152366	0.0174006	0.0169544	0.014241	0.036728	0.129702	0.162222	0.0279351	0.119635	0.0364681	0.00681885	0.0267387	0.0279482	0.0579433	0.138757	0.0740859	0.0217918	4.3057e-05	0.0114214	0.0507076	0.0204492
GSM990465	67	0.0091642	0.0646773	0.0120423	0.0169354	0.00963578	0.0232731	0.0122571	0.0809006	0.0057999	0.0261187	0.0227618	0.000559957	0.0971164	0.0203541	0.132666	0.0461889	0.0178287	0.0799615	0.0338154	0.00620152	0.0426927	2.68843e-05	0.00309029	0.0192718	0.00856925	0.0818765	0.0350766	0.0104227	0.0304319	0.0213154	0.0171866	0.0234201	0.107133	0.172847	0.00909995	0.0627291	0.0224258	0.00706439	0.0105856	0.0627338	0.0645461	0.140033	0.0252647	0.0259791	0.00298596	0.01199	0.0762663	0.0108688
GSM990575	67	0.00741514	0.0622578	0.0057917	0.00218213	0.0154303	0.0337756	0.0111252	0.0396292	0.0197352	0.0229756	0.082013	0.00787841	0.130475	0.024118	0.203553	0.0325899	0.0245449	0.0674287	0.0284583	0.00794633	0.0456575	0.0209286	0.000390739	0.0110222	0.012436	0.0409169	0.034188	0.0100866	0.0111292	0.0382044	0.0105124	0.0306786	0.0374108	0.0976812	0.00531745	0.0390721	0.0164143	0.00975164	0.0331012	0.0456923	0.0965886	0.126845	0.047501	0.0162582	0.00630599	0.0126647	0.0897735	0.0344711
GSM989829	66	0.0125244	0.104874	0.0100971	0.00754985	0.0268816	0.0228458	0.0264754	0.0631278	0.00199851	0.00264226	0.0276146	0.007706	0.121395	0.0144752	0.158994	0.0415098	0.0380247	0.0755227	0.051813	0.021512	0.0576038	0.0160476	0.00250691	0.0148816	0.011317	0.0790368	0.0536918	0.0144504	0.0172411	0.0309013	0.0192934	0.0190866	0.115925	0.162676	0.0242713	0.0807507	0.0319655	0.00546959	0.0409478	0.0487734	0.0747427	0.150395	0.0400244	0.0276649	0.0120713	0.0221111	0.103803	0.0595448
GSM989874	66	0.0113101	0.0859388	0.005886	0.00902548	0.0288138	0.0160015	0.0280387	0.061034	0.00164618	0.00849059	0.0250424	0.00673819	0.124036	0.013116	0.123198	0.0466709	0.0313582	0.0759103	0.0545365	0.0131893	0.0352313	0.0222267	4.83285e-05	0.010116	0.0113699	0.0368286	0.0475233	0.0212638	0.0214713	0.0230574	0.020533	0.030948	0.12459	0.154697	0.0202602	0.0710612	0.0153322	0.0063106	0.0411943	0.0472783	0.0686669	0.176332	0.0281581	0.0309115	0.00656945	0.00809155	0.0712271	0.0350272
GSM989912	66	0.00326979	0.150088	0.0140294	0.0206267	0.0199447	0.0184732	0.0268225	0.137936	3.90992e-05	0.00720149	0.0367498	3.90992e-05	0.174591	0.0162921	0.157805	0.0496064	0.0338312	0.158456	0.0469436	0.0335701	0.0940361	0.00849383	0.131143	0.022168	0.0107465	0.151526	0.045276	0.00844028	0.0333518	0.0250583	0.00768539	0.0493627	0.244618	0.288335	0.0179967	0.151761	0.0367885	0.000981368	0.0534052	0.0400931	0.0610474	0.172911	0.102985	0.0555747	3.90992e-05	0.0123418	0.0895236	0.0442766
GSM989920	66	0.000770104	0.128615	0.00956111	0.0276115	0.0156936	0.0280578	0.125373	0.0643015	0.00055338	3.49189e-05	0.0198328	0.00416401	0.16284	0.0153121	0.0926734	0.053766	0.0296381	0.145635	0.048419	0.0152742	0.0552123	3.49189e-05	3.49189e-05	0.016206	0.0094871	0.119925	0.0281352	0.00816903	0.011701	0.025626	0.0122765	0.0427003	0.155487	0.162816	3.49189e-05	0.0671733	0.0180085	3.49189e-05	0.0327075	0.0474253	0.0784703	0.162167	0.0589589	0.0366565	0.00218908	0.00739416	0.0736066	0.00435226
GSM990019	66	0.00974709	0.106497	4.2275e-05	4.2275e-05	0.00927385	0.0158971	0.0264087	0.0727507	0.016687	4.2275e-05	0.0261263	0.00147865	0.0943486	0.0147155	0.119863	0.0407054	0.0422678	0.0509242	4.2275e-05	0.00519657	0.0397449	4.2275e-05	4.2275e-05	0.00800505	0.00403513	0.051318	0.0594796	0.00203445	0.0114468	0.0159045	0.0198874	0.0213147	0.0949978	0.161852	4.2275e-05	0.0650977	0.0231039	4.2275e-05	0.0059034	0.0616027	0.065062	0.156123	0.0246168	0.0203459	0.0088736	0.00228985	0.0747089	0.0239569
GSM990043	66	0.00681124	0.0913742	0.00499385	0.000276278	0.0120422	0.0196806	0.0172564	0.0503132	0.0042857	0.000340041	0.0231945	0.00496366	0.104367	0.0193758	0.124091	0.0934855	0.0407015	0.0822527	0.0207302	0.0123817	0.0345286	0.0067062	0.0298465	0.010142	0.00946608	0.113095	0.0371896	0.0184209	0.024004	0.0181234	0.00889968	0.0265792	0.130771	0.225905	0.0102204	0.0689986	0.0323053	0.00485498	0.0282165	0.0374186	0.0747687	0.149677	0.0196139	0.0365698	6.00732e-05	0.0204504	0.101579	0.0448988
GSM990122	66	0.0104289	0.0763196	0.0108488	0.0172096	0.0164461	0.0219719	0.00849348	0.0729915	0.014798	0.0181347	0.0279204	0.0124363	0.15511	0.0218126	0.129341	0.0353078	0.024246	0.141901	0.0379164	0.0230946	0.0363239	0.00747418	0.0287736	0.00398522	0.00788998	0.0669801	0.0401183	0.0195528	0.0195403	0.0128617	0.0242023	0.0229817	0.103746	0.109235	0.00760057	0.0741367	0.0636859	0.00220764	0.0148266	0.0574582	0.0703401	0.15903	0.0580517	0.0267884	0.000261286	0.0232064	0.0539962	0.0145768
GSM990280	66	0.00479644	0.0424301	0.00648285	2.01404e-05	0.0153903	0.0169375	0.0212532	0.0365377	0.0123831	2.01404e-05	0.0228614	0.00681669	0.0867897	0.0125961	0.0743292	0.03397	0.0272151	0.119107	0.0328506	2.01404e-05	0.0243727	0.00383573	2.01404e-05	0.00558467	0.00949703	0.0585657	0.0230731	0.0150826	0.0144528	0.00633915	0.0100796	0.0135505	0.0490085	0.0596675	0.0170243	0.0614514	0.011926	0.0027779	0.0252604	0.0647692	0.0656517	0.141181	0.0173416	0.0306088	0.00219989	0.00892588	0.0465215	0.013173
GSM990284	66	0.0099683	0.112345	0.00808218	0.0164747	0.0209756	0.0270966	0.0671648	0.0730009	0.00632083	0.027902	0.035469	0.0124241	0.116072	0.0222508	0.124952	0.0732707	0.0259484	0.0822084	0.033325	0.0201834	0.0416718	0.00444955	0.00589141	0.0100363	0.00651931	0.0597816	0.0508176	0.011517	0.0187776	0.0124109	0.0211089	0.027855	0.145517	0.140049	3.89774e-05	0.0697016	0.0144275	6.98531e-05	0.0387478	0.0613818	0.0708658	0.137715	0.0515105	0.0502861	0.00019914	0.00577822	0.060789	0.0258387
GSM990311	66	0.0109691	0.0968824	0.00628382	0.0124553	0.0181917	0.0104404	0.130818	0.0974102	0.00371164	0.0074909	0.0336155	0.00508732	0.183347	0.0245359	0.176241	0.0901777	0.0416205	0.134852	0.0333971	0.0135332	0.0653629	3.61336e-05	0.00177198	0.0206777	0.000690438	0.10784	0.0735489	0.00953061	0.00613975	0.0163489	0.0214187	0.0389315	0.128604	0.216346	0.0117342	0.0916423	0.0247517	3.61336e-05	0.0741599	0.0451222	0.064131	0.206266	0.0778199	0.0348161	0.00829381	0.0197044	0.0648849	0.0121725
GSM990345	66	0.00767331	0.0810902	0.0159911	0.012434	0.00966491	0.0139643	0.0190964	0.0912368	0.00280727	0.00631458	0.0149585	4.1387e-05	0.147164	0.00662141	0.0278773	0.0975585	0.0337206	0.122326	0.0345838	0.0129994	0.0439852	0.0133905	0.00500906	0.00296589	0.00863816	0.0760288	0.018307	0.0108295	0.0224499	0.0154891	0.00558117	0.0107788	0.143466	0.179609	0.002186	0.0936974	0.0123021	0.00919685	0.059443	0.0356097	0.0541373	0.141788	0.0349463	0.0404669	4.1387e-05	0.0224076	0.0880574	0.0123045
GSM990378	66	0.00995781	0.0867185	0.00754983	0.0301902	0.00280339	0.0121898	0.126737	0.0466186	2.66945e-05	0.0210107	0.0175959	2.66945e-05	0.162454	0.0168415	0.150551	0.0347293	0.0256784	0.0645276	0.0432955	0.00216656	0.0611743	0.000223555	0.0147776	0.000405876	0.00077682	0.0810523	0.0397392	0.00932416	0.026112	0.0117996	0.0132738	0.0131846	0.148784	0.0775371	0.00173332	0.105688	0.0199963	2.66945e-05	0.0182049	0.0549124	0.0697677	0.108315	0.0230573	0.0288992	0.00365199	0.0135557	0.0750587	0.0188764
GSM990388	66	0.0125627	0.204973	0.00565801	0.0105804	0.013437	0.0165413	0.26235	0.0980749	0.0109179	0.0109162	0.0208155	0.0119531	0.25841	0.0168678	0.158477	0.205585	0.0423416	0.256473	0.0801143	0.0181961	0.0442815	3.19442e-05	0.00865924	0.0166133	0.007019	0.0939806	0.0395596	0.018239	0.0253607	0.00717655	0.00951611	0.0626025	0.204365	0.168197	0.0766119	0.0954138	0.0513602	0.0035714	0.0333723	0.034783	0.0693181	0.20262	0.0309732	0.0457507	0.00363861	3.19442e-05	0.0548766	0.0335365
GSM990405	66	0.0120646	0.109149	0.00282404	3.28455e-05	0.0116832	0.0171714	0.0152188	0.0566987	0.00793625	0.0155784	0.0115856	0.00491715	0.170626	0.0212474	0.102316	0.0478649	0.0299397	0.144309	0.0275149	0.0172443	0.0407508	3.28455e-05	0.000960726	0.0123867	0.0116081	0.0874482	0.0555606	0.0138567	0.022046	0.0160731	0.00483706	0.105033	0.126306	0.102001	0.0137176	0.0509858	0.0315045	3.28455e-05	0.0194914	0.0267432	0.0855502	0.120213	0.0371241	0.031705	0.00849726	0.00463467	0.0621378	0.00909468
GSM990407	66	0.00862287	0.193415	0.00965591	0.0129069	0.00868749	0.0162913	0.0346903	0.120669	0.0034861	0.0120945	0.0366016	0.0105812	0.188948	0.0249663	0.0635518	0.145385	0.0254627	0.204753	0.0511004	0.0236689	0.0764778	0.0044512	0.00371054	0.010447	0.00557842	0.227655	0.0412671	0.0155561	0.0467878	0.0207457	0.0145658	0.0133941	0.303806	0.30876	4.80974e-05	0.104502	0.0400993	4.80974e-05	0.0743188	0.036522	0.0674767	0.138529	0.0838401	0.090939	0.0040399	0.0145414	0.181345	0.00933856
GSM990428	66	0.00510812	0.0403495	0.00336048	0.00949121	0.00684781	0.0290829	0.0194326	0.0471879	0.0137077	0.00168718	0.039104	4.22084e-05	0.162255	0.0294373	0.102603	0.0369418	0.00321445	0.0866503	0.0366867	0.0132782	0.0374707	0.00450966	0.00495497	4.22084e-05	4.22084e-05	0.063197	0.0543676	0.00392896	0.0213633	0.0246164	4.22084e-05	0.0241054	0.0834437	0.132944	4.22084e-05	0.0520471	0.00295844	0.00746321	0.0279561	0.0500684	0.0912875	0.138661	0.0648001	0.00771896	4.22084e-05	0.0154594	0.0516778	4.22084e-05
GSM990435	66	0.00525152	0.052082	0.00263192	0.00984638	0.0224148	0.0177367	0.00570562	0.0331981	0.00759358	4.53606e-05	0.01864	4.53606e-05	0.064565	0.0252178	0.117201	0.0170878	0.0296248	0.0900635	0.0117884	0.000784794	0.0328358	0.00470627	4.53606e-05	4.53606e-05	0.0033596	0.0263833	0.0426179	0.0136246	0.0112414	0.0320514	0.0152981	0.0234724	0.0454624	0.0636861	4.53606e-05	0.0316869	0.00491116	4.53606e-05	0.0090332	0.0569143	0.084809	0.153468	0.0600669	0.0190815	0.00618426	0.00517724	0.0480815	4.53606e-05
GSM990480	66	0.0215666	0.0628552	0.00589461	0.00570254	0.0201159	0.0230957	0.02156	0.0506508	3.50589e-05	0.0072312	0.0145357	0.00333462	0.119615	0.0177497	0.0725742	0.0324595	0.0268684	0.0487868	0.0140054	0.0230066	0.0488855	0.00467437	0.0108944	0.00241845	0.0103611	0.0230408	0.0481093	0.0216675	0.0140673	0.0115554	0.0239118	0.024412	0.109259	0.0399707	0.00117151	0.0475573	0.0151768	3.50589e-05	0.0110319	0.051776	0.0656132	0.150597	0.0653046	0.0249335	0.0131091	0.0143081	0.0497722	0.0214385
GSM990548	66	3.66634e-05	0.0889883	0.00824848	0.0011843	0.0167884	0.0291777	0.0263155	0.0786735	3.66634e-05	0.00670701	0.0282853	3.66634e-05	0.184532	0.0243204	0.100162	0.00999603	0.0327359	0.149692	0.0333329	3.66634e-05	0.0443478	0.000671917	0.0244581	0.0120237	0.0189242	0.0977437	0.0360869	0.0105369	0.027736	0.0126447	0.0164997	0.0343466	0.122006	0.161528	0.00731463	0.0790734	0.0207945	0.00436159	0.0254254	0.0636301	0.0861643	0.122388	0.155537	0.018182	0.00852742	0.0102437	0.151048	0.0131661
GSM990593	66	0.000712292	0.0637409	0.002885	3.65966e-05	0.0101037	0.0306571	0.00180873	0.0703349	3.65966e-05	3.65966e-05	0.00998583	0.00322646	0.12851	0.019078	0.0653966	0.119706	0.0261035	0.0869018	0.029202	0.0245934	0.0245612	0.000212993	0.00156464	0.00749841	3.65966e-05	0.0405663	0.026902	0.0200527	0.024508	0.00613982	0.0144876	0.0408117	0.075299	0.0890324	0.00188118	0.0530743	0.0206065	3.65966e-05	0.0424281	0.0508501	0.0862164	0.132866	0.013741	0.0232667	0.00970883	0.00689901	0.0596993	0.0385911
GSM990596	66	0.00615267	0.107846	0.000135023	0.00176761	0.0212584	0.027386	0.00665728	0.0517053	0.00737472	0.0166785	0.0324626	5.2175e-05	0.0929842	0.0286932	0.0734886	0.0997668	0.0306628	0.126401	0.00472197	0.022082	0.0231918	5.2175e-05	0.00155069	0.0108891	0.0148132	0.0702701	0.0159109	0.0147959	0.0245119	0.0446522	0.0216641	0.0243316	0.0864307	0.133634	5.2175e-05	0.0520477	0.00752829	0.0145119	0.032403	0.0369415	0.0837388	0.146908	0.118965	0.0212066	0.0124955	5.2175e-05	0.0634363	0.0247896
GSM990613	66	0.00475282	0.10904	0.00559226	0.0160838	0.0179393	0.023958	0.0247247	0.117123	0.00754349	0.0173849	0.0140993	3.1351e-05	0.119774	0.0180584	0.187458	0.0275114	0.0348234	0.129217	0.0553949	0.0130487	0.0495359	0.00951598	0.00129798	0.0112764	0.0069435	0.104946	0.042832	0.0195294	0.018811	0.0190274	0.00332719	0.0453678	0.15029	0.210152	0.00243079	0.0620854	0.0205149	0.00279585	0.0158814	0.0474807	0.0825318	0.14013	0.0450364	0.0369863	0.0055256	0.00315068	0.098274	0.00475106
GSM989908	65	0.00715826	0.151286	0.0114623	0.0161413	0.0242091	0.0136549	0.037522	0.062082	0.00251623	0.00232262	0.034554	0.00225219	0.115993	0.0097998	0.113865	0.0926537	0.0261535	0.140857	0.04663	0.012022	0.0622638	0.0130391	0.0126721	0.0172207	0.00221403	0.095567	0.0248602	0.0132895	0.0212577	0.0232174	0.0150221	0.0390629	0.188425	0.229229	0.0150977	0.096146	0.0188942	0.00121661	0.048218	0.0525757	0.0703534	0.16647	0.0295837	0.0454644	0.00628087	0.0110435	0.0922714	0.0341241
GSM989909	65	0.00897841	0.0857157	3.95627e-05	0.00900391	0.0161343	0.01428	0.0114873	0.0385449	0.00209978	0.00597717	0.0181848	0.00556518	0.0706159	0.016264	0.0913907	0.0523581	0.0205196	0.0669372	0.0473033	0.00125887	0.0559453	0.0162133	3.95627e-05	0.00423009	0.00971972	0.075514	0.0373286	0.00965761	0.00620546	0.022814	0.00976625	0.0198291	0.0994324	0.0539639	0.0111891	0.0827372	0.0119799	3.95627e-05	0.0336699	0.0504304	0.0783482	0.135067	0.0347408	0.0285954	0.00312025	0.00811133	0.0850097	0.0224981
GSM989926	65	0.00349001	0.101502	3.4373e-05	0.00538386	0.0240761	0.0158959	0.0235763	0.0426478	0.00923474	3.4373e-05	0.0147715	3.4373e-05	0.105041	0.0221339	0.0563571	0.0928734	0.0302454	0.110731	0.0436234	0.00455351	0.0318119	0.00375102	0.000961974	0.00512785	0.0126549	0.0540475	0.0219878	0.0143927	0.0134568	0.0181859	0.00955348	3.4373e-05	0.109106	0.134701	0.000622056	0.0397044	0.014033	3.4373e-05	0.0378432	0.0227248	0.0797538	0.144757	0.0292058	0.0210356	3.4373e-05	0.0115251	0.0624743	0.00854842
GSM989974	65	0.012196	0.0689961	4.30917e-05	0.00359578	0.0115233	0.0185851	0.00870492	0.0375336	0.00184591	0.010918	0.016599	0.0171945	0.0766105	0.0159425	0.105246	0.0288512	0.0277209	0.0588288	0.0340707	0.0145255	0.0362327	0.00540216	0.0239745	0.0165836	0.00676929	0.0498743	0.0355854	0.0168907	0.0106132	0.0237436	0.0122401	0.0165905	0.0582964	0.04098	0.00756116	0.0336176	0.024661	0.00533293	0.0414327	0.0538153	0.0764971	0.152404	0.0145576	0.0248295	0.00304889	0.0208692	0.0517057	0.0360501
GSM989981	65	0.00819824	0.0938466	0.00262679	0.00264995	0.0141204	0.0222717	0.00698945	0.0315317	0.00131398	0.0062941	0.0173351	0.000878658	0.076263	0.0147853	0.14081	0.0357212	0.0279148	0.034732	0.0248026	3.60308e-05	0.0266223	0.00902062	0.00529829	0.00685917	0.000574383	0.0487771	0.0293718	0.0172709	0.0180974	0.033927	0.00238731	0.0207337	0.0615638	0.101817	0.00403588	0.0351139	0.00912015	0.00543118	0.00663885	0.0476582	0.0694454	0.128947	0.0250129	0.0162049	3.60308e-05	0.0115075	0.068563	0.0373576
GSM990110	65	0.00373893	0.122217	0.0194422	0.00396543	0.0145904	0.0305019	0.14552	0.11768	0.00590451	0.0232425	0.00728438	0.000308912	0.166012	0.021716	0.105523	0.0507386	0.0192503	0.190235	0.048175	0.0133834	0.0468524	0.00400351	3.93853e-05	0.0109531	0.00219116	0.155686	0.0336803	0.0139659	0.0100647	0.0141452	0.0164543	0.0568835	0.231452	0.1832	0.00050632	0.110696	0.013388	3.93853e-05	0.0311213	0.0301782	0.0649042	0.123197	0.043282	0.0236359	3.93853e-05	0.0119654	0.0988281	0.0228493
GSM990310	65	0.0621215	0.0609316	0.00855202	3.53476e-05	0.0147739	0.028616	0.00821122	0.0296656	0.00129094	0.0113858	0.0292988	0.00852456	0.0864036	0.0248751	0.141632	0.234443	0.0313596	0.174833	0.0180791	0.00292006	0.061639	0.0111766	0.000686383	0.00598037	0.00785396	0.0419208	0.0384483	0.0161664	0.00886579	0.0100751	0.0113371	0.0374563	0.0628271	0.129958	3.53476e-05	0.0593436	0.00415556	0.000188466	0.00308389	0.0440552	0.0738604	0.145962	0.0159986	0.0194636	3.53476e-05	0.00608107	0.028621	0.0259889
GSM990332	65	0.0117302	0.105248	0.0183364	0.0160082	0.0195292	0.0375152	0.0179842	0.0972358	3.32448e-05	0.00670664	0.0145061	0.00616829	0.153626	0.0200674	0.107239	0.0928367	0.0292946	0.143026	0.0867731	0.0274847	0.0401039	0.010495	0.00538624	0.00842202	0.000426374	0.143118	0.0321357	0.0180996	0.0240609	0.0240591	0.0207292	0.0366704	0.13467	0.24337	0.0217361	0.0845638	0.0499974	3.32448e-05	0.022525	0.0453276	0.0878368	0.127312	0.0448074	0.0330933	0.00594347	0.00787762	0.0549685	0.0057774
GSM990363	65	0.00844675	0.0850452	3.66735e-05	0.00199368	0.0212311	0.0161004	0.0562579	0.102408	0.00691075	0.00192184	0.0195915	3.66735e-05	0.199882	0.0205296	0.0329456	0.0668144	0.0253096	0.107178	0.0564207	0.0342609	0.00988905	0.00727415	0.00294953	0.000578622	0.0173184	0.0877714	0.0245051	0.0173192	0.0161718	0.00740643	0.0121258	0.0212231	0.148016	0.154923	0.00560536	0.0658945	0.0890185	0.00281893	0.028597	0.0370899	0.0646337	0.122643	0.0131685	0.0279451	0.00401539	0.00657716	0.0669636	0.0221091
GSM990389	65	0.00996776	0.100652	0.00996939	0.0211493	0.0110769	0.0153228	0.00819632	0.0624607	0.00433969	0.0082159	0.0130399	0.0142827	0.134674	0.016042	0.158419	0.0433254	0.0176271	0.0427108	0.0562905	0.0224203	0.0474649	2.86559e-05	0.00897432	0.0111804	0.0104702	0.0874664	0.0382168	0.0160511	0.0199458	0.00776228	0.0225998	0.0146018	0.123945	0.170972	2.86559e-05	0.0604909	0.0130657	2.86559e-05	0.0269274	0.0265307	0.0507618	0.123435	0.0492752	0.0288111	0.00343993	0.00991888	0.0504448	0.0293966
GSM990415	65	0.00935936	0.132501	0.0126792	0.148518	0.0125407	0.0253972	0.0414102	0.0759164	0.00298091	0.000677748	0.014907	0.00060097	0.174253	0.0259818	0.11491	0.0536414	0.0200078	0.226704	0.0575605	0.0398945	0.0379772	0.0129635	0.0254945	0.00596041	4.10087e-05	0.188919	0.0389876	0.0130237	0.0121716	0.0143136	0.00311738	0.0442647	0.126929	0.152022	0.00690911	0.0795959	0.0660659	4.10087e-05	0.0696922	0.03302	0.0834505	0.167475	0.0577105	0.0781974	0.00795359	0.0130715	0.0925094	4.10087e-05
GSM990420	65	0.00625245	0.0460358	4.12368e-05	0.0123484	0.0119212	0.0174589	0.00779164	0.0263567	0.0082725	4.12368e-05	0.0318666	0.000280445	0.0822756	0.0209442	0.126547	0.0322372	0.0229864	0.0332718	0.0141417	4.12368e-05	0.0514174	0.0136133	0.00311699	0.00281083	0.0088933	0.0506742	0.0332115	0.00882524	0.00692012	0.0410483	4.12368e-05	0.0173768	0.0808238	0.0842512	0.00404492	0.0219435	0.00795359	0.00587924	0.0169986	0.0371893	0.0920999	0.116033	0.0257002	0.0189268	0.0033309	0.0132428	0.0513641	0.0216042
GSM990426	65	0.00385349	0.0866429	0.0152904	0.019509	0.00484369	0.0273968	0.0578118	0.116387	0.00546655	0.0114325	0.0201382	0.0103974	0.136121	0.0237522	0.12109	0.086793	0.020315	0.105784	0.0461838	0.0187169	0.0543539	0.00267239	0.00561962	3.98117e-05	0.0252436	0.0952429	0.0465972	0.00742249	0.012312	0.034905	0.0141583	0.0531209	0.119469	0.109332	3.98117e-05	0.0965529	0.0416962	0.00100041	0.0262053	0.0727601	0.103014	0.162443	0.106807	0.0352861	3.98117e-05	0.000755848	0.0782363	0.00807157
GSM990440	65	0.00206052	0.108665	0.00487182	0.00979164	0.00754666	0.0118053	0.0587811	0.104999	0.00817032	0.0105293	0.0402079	2.86209e-05	0.128493	0.0219044	0.139147	0.12815	0.0236807	0.122554	0.0446335	0.0403913	0.0701463	0.00596038	2.86209e-05	0.0100839	0.00857709	0.0886094	0.0530138	0.0103739	0.0130913	0.00571066	0.00977929	0.0502866	0.177974	0.104404	2.86209e-05	0.0832514	0.0401141	0.00542895	0.0430658	0.0320972	0.0736993	0.150405	0.0940473	0.0478231	0.00649736	0.0084851	0.0720545	0.00954849
GSM990442	65	0.0105207	0.0659612	0.0134208	0.0138072	0.0209821	0.0170987	0.0209303	0.0386412	2.76148e-05	0.00803566	0.0283819	0.000948538	0.0798911	0.0254615	0.155168	0.0431059	0.0230022	0.0368494	0.0219144	0.0069588	0.0118697	2.76148e-05	0.0483086	0.00333824	0.010336	0.0740125	0.0358489	0.0165531	0.016456	0.012704	0.0240966	0.0288645	0.0932587	0.0800674	2.76148e-05	0.0409144	0.00768707	2.76148e-05	0.0152768	0.052587	0.0720393	0.123523	0.0288884	0.00456033	0.00487913	0.00514847	0.0467324	0.0174702
GSM990478	65	0.00668326	0.124364	4.51868e-05	0.0033089	0.0112585	0.023192	0.0972797	0.0506038	0.00714377	0.00293434	0.029718	0.0086135	0.151625	0.0166912	0.148962	0.0715774	0.0350942	0.117209	0.044574	0.00658184	0.0412619	4.51868e-05	0.00276085	0.023153	0.00281929	0.14677	0.0540106	0.0135865	0.0107454	0.0205946	0.0195805	0.023551	0.140508	0.101687	0.0217758	0.0784029	0.0196271	0.00422771	0.0162989	0.0461544	0.0888188	0.153578	0.0340056	0.0410192	0.00679041	4.51868e-05	0.0625503	0.0120959
GSM990599	65	0.00978456	0.159478	0.00509077	0.0197708	0.00918674	0.0259983	0.0432643	0.187949	0.000605288	0.0293273	0.0482266	0.00810924	0.190814	0.0151262	0.11849	0.15291	0.0253689	0.135671	0.0730296	0.0129466	0.0544995	0.00142352	0.00336428	4.98801e-06	0.00160256	0.100901	0.0347489	0.0135185	0.0344851	0.0133339	0.015167	0.032053	0.209574	0.218587	0.000162786	0.143808	0.0241263	0.0143718	0.0347983	0.0442935	0.0787921	0.132855	0.0429401	0.0354245	0.00482603	0.0111559	0.0837874	0.00143341
GSM989830	64	0.0118819	0.0838087	0.00485815	0.00474774	0.0249904	0.0232463	0.026037	0.0527352	0.00314761	0.0128601	0.0560065	0.000640836	0.130723	0.024755	0.175989	0.0380281	0.0302837	0.0497356	0.0642891	0.0144462	0.0687701	0.0180899	0.0180613	0.0195084	0.0184358	0.0791581	0.0417535	0.0161307	0.0176281	0.0307475	0.0218321	0.0451691	0.108456	0.172225	0.00938651	0.0700065	0.0106176	0.00517435	0.0224199	0.061542	0.0740308	0.146827	0.0273565	0.0176234	0.00460072	0.0188819	0.0806161	0.0424196
GSM989963	64	0.00361803	0.173008	0.0118756	0.0150906	0.0192627	0.0286498	0.0322097	0.0578943	0.0277442	0.00247191	0.037185	3.70942e-05	0.141323	0.020052	0.138264	0.0585848	0.0320045	0.180837	0.0851887	0.0493652	0.0529273	0.00122642	0.00832627	0.0171423	0.000319153	0.103625	0.0413928	0.0151863	0.0340684	0.0474081	0.0120971	0.0446476	0.129446	0.240638	0.0235725	0.0803428	0.0178022	0.00328244	0.037311	0.0441683	0.0717946	0.191179	0.0909883	0.0444235	0.00782458	0.0137869	0.099311	0.0274081
GSM990031	64	0.00742508	0.0460907	0.0019688	3.8754e-05	0.0139007	0.0225149	0.00176199	0.0602394	0.00362021	0.00580276	0.0233911	0.00458824	0.0779502	0.010838	0.168752	0.0383263	0.0281176	0.0264892	0.0378008	0.00623027	0.0385361	3.8754e-05	0.00924111	3.8754e-05	0.00194545	0.0303353	0.0305245	0.0114912	0.0107128	0.0216978	0.00875221	0.0109271	0.0595842	0.12793	3.8754e-05	0.0505416	0.0108459	0.00113861	0.0131617	0.0451428	0.0810682	0.110498	0.0192559	0.0137799	0.00160235	0.00917558	0.0644588	0.0188703
GSM990067	64	0.00736869	0.0656749	0.0119714	0.0105775	0.0146989	0.0389323	0.0212688	0.0369194	0.0114313	0.00644341	0.0429105	0.00874389	0.160713	0.0177485	0.0808313	0.0496214	0.0375065	0.0880208	0.0301823	0.0089016	0.0476658	0.010876	0.0107099	0.00796456	0.0119173	0.0830602	0.0242363	0.0154302	0.0253275	0.0290465	0.0231607	0.0225177	0.0782584	0.121034	0.0141155	0.0456668	0.0381775	0.00288443	0.0274246	0.0453895	0.0729763	0.158679	0.049039	0.0212911	0.0123101	0.0179404	0.0673981	0.0194827
GSM990084	64	3.30022e-05	0.116452	0.00728696	0.00514226	0.0211355	0.0263866	0.124695	0.121988	0.022226	3.30022e-05	0.0538821	0.0116122	0.171409	0.0238723	0.142625	0.0659066	0.0436488	0.254505	0.0647083	0.076606	0.0635206	0.0116772	0.00421693	0.0142687	0.0110442	0.158443	0.0610905	0.0268549	0.0274039	0.0321321	0.00598799	0.0518802	0.156911	0.21594	0.0240971	0.121986	0.129013	3.30022e-05	0.0236044	0.0279609	0.0797558	0.15489	0.144619	0.0342966	0.00139464	0.0256308	0.0901506	0.0258005
GSM990089	64	0.00859834	0.129778	0.0118815	0.0194406	0.0216962	0.0232366	0.0943253	0.0482824	0.0095388	0.00877515	0.0353744	0.0023218	0.163223	0.0134426	0.170539	0.0713459	0.02422	0.120265	0.0222797	0.0110894	0.0784529	0.0136122	3.22996e-05	0.0134278	0.00480541	0.134333	0.0493634	0.0263077	0.0158548	0.0324884	0.0106902	0.0509701	0.173237	0.122013	0.0086906	0.088477	0.0333097	0.0045436	0.046994	0.0466977	0.0949452	0.136944	0.0662363	0.0176779	0.00386627	0.0163359	0.070917	0.035579
GSM990099	64	0.0106233	0.134213	0.00569399	0.00973329	0.0112437	0.0171402	0.090979	0.119079	3.0664e-05	0.00295311	0.0209887	0.0106149	0.121549	0.0211839	0.141317	0.0402757	0.0328524	0.135295	0.0525794	0.0179575	0.0546751	0.00922444	3.0664e-05	0.0386542	0.00445887	0.0937506	0.067975	0.00692217	0.0248066	0.0220675	0.0251034	0.0414912	0.117684	0.209382	0.00258073	0.121919	0.102776	0.0150127	0.0605084	0.0525369	0.0821722	0.181814	0.0408183	0.0232312	0.00207595	0.0140671	0.0583532	0.0227729
GSM990117	64	0.00983014	0.172077	0.0123646	0.0274189	0.0227491	0.023971	0.0595147	0.139767	0.00261765	0.0174851	0.0520084	0.0131342	0.161381	0.0153421	0.0997804	0.032692	0.0333486	0.242698	0.0325762	0.0168766	0.056525	0.0133962	0.00521584	0.0129158	0.0144825	0.142925	0.0588315	0.00969552	0.0283048	0.0248619	0.0166053	0.0349705	0.256686	0.172172	0.015786	0.11889	0.0447037	0.00282204	0.0258095	0.0485212	0.0874672	0.175026	0.0770167	0.0303741	0.0102781	0.0120046	0.111774	0.021475
GSM990121	64	0.014321	0.137498	0.0133107	0.0268405	0.016821	0.0307343	0.0588371	0.10257	0.00525479	0.0111818	0.0354043	0.00720763	0.17331	0.0271898	0.105895	0.0587158	0.0363293	0.149953	0.0413294	0.0174652	0.0452428	0.0139056	0.0337438	0.000382907	0.0141765	0.0787964	0.0817627	0.0232533	0.0310043	0.01348	4.3228e-05	0.0432553	0.232182	0.154738	0.00182668	0.0863174	0.0151439	0.00377716	0.0505574	0.0500557	0.0788276	0.160263	0.0400876	0.0654669	0.00704617	0.00517147	0.0766109	0.0119998
GSM990282	64	0.00619369	0.105789	0.00232192	0.0102964	0.00779955	0.0155595	0.0614196	0.0981811	0.00305281	2.70111e-05	0.0147098	0.00371506	0.112998	0.0107699	0.118018	0.0571089	0.0310795	0.111051	0.0229745	2.70111e-05	0.0353707	0.0200027	0.0125746	0.013055	0.00889226	0.0466887	0.0372535	0.0124934	0.00561851	0.00785688	0.0135895	0.0335963	0.147854	0.17378	0.0173721	0.0551299	0.00828704	0.00349762	0.0237169	0.043561	0.0732989	0.140412	0.0238991	0.0231011	0.00789156	0.00852835	0.0440914	0.00928229
GSM990293	64	0.00970377	0.0920664	0.0138996	0.00531715	0.0165423	0.0179686	0.025765	0.0857057	0.00700096	3.48147e-05	0.0148948	0.00477904	0.14202	0.0213674	0.174661	0.0301553	0.0396666	0.0952321	0.0155947	0.0309335	0.0348616	0.00515183	0.00367844	0.00812669	0.013805	0.0797472	0.0367483	0.0219035	0.0131103	0.0132447	0.0145612	0.0220355	0.106854	0.0947751	3.48147e-05	0.0682182	0.0184979	0.000995118	0.0431128	0.0507368	0.067359	0.150693	0.0384597	0.0196736	0.00286872	0.0105776	0.0541867	0.0228847
GSM990297	64	0.0122664	0.166396	0.00697901	0.0246068	0.010272	0.0251011	0.0517823	0.121639	0.00368199	0.0368753	0.017793	0.000493865	0.142368	0.0174411	0.142274	0.0870115	0.0315509	0.154278	0.0494489	0.0137006	0.0439945	0.00282175	2.99919e-05	0.0128823	0.00479634	0.113159	0.0758231	0.0127652	0.0510989	0.0157807	0.016862	0.0152624	0.175082	0.206478	0.00909495	0.129456	0.0322736	0.0021567	0.048394	0.0417831	0.0807328	0.134867	0.0960194	0.039726	0.00616542	0.00650045	0.0701268	0.0232391
GSM990307	64	0.00863069	0.152951	0.0120468	0.0124293	0.00827855	0.0182045	0.0913206	0.15094	3.29924e-05	0.0253974	0.0169548	0.0203773	0.167121	0.0134587	0.173913	0.14842	0.0195098	0.0889935	0.123303	0.0379927	0.0634769	0.00231739	0.0361621	3.29924e-05	0.00779899	0.156089	0.0489709	0.0118142	0.0241241	0.0198488	0.0125428	0.0639878	0.175441	0.270648	3.29924e-05	0.0815281	0.0366813	0.000697069	0.0574064	0.0362588	0.062967	0.166164	0.0221064	0.0490007	0.00155366	0.00668103	0.0950501	0.0137911
GSM990308	64	0.00775828	0.120385	0.0195534	0.00127887	0.00978686	0.0155383	0.0550014	0.136486	0.00537721	0.0107707	0.0312126	0.0127954	0.201674	0.0119171	0.148115	0.099087	0.0352872	0.117126	0.0556843	0.0233411	0.0505811	0.00242577	0.0638077	0.00395762	3.23439e-05	0.126906	0.0581643	0.0160575	0.0286818	0.00884494	0.00716888	0.0608733	0.177221	0.173896	0.00703187	0.145837	0.037073	0.0109406	0.0442546	0.0341581	0.0744187	0.175478	0.0728164	0.0481327	0.00216807	0.0126095	0.101357	0.0532538
GSM990335	64	0.011892	0.106094	0.0103556	3.08499e-05	0.00883626	0.0266582	0.0351031	0.0854629	0.000553319	0.0194425	0.00854765	0.00220823	0.176953	0.0116894	0.174626	0.0119866	0.0153318	0.151493	0.0290067	0.0307621	0.0518688	0.000861795	3.08499e-05	0.00344308	0.0022588	0.123177	0.0402407	0.00937291	0.0302385	0.0195592	0.0128953	0.0578417	0.1061	0.162774	0.0162558	0.0757458	0.0302842	3.08499e-05	0.0383995	0.0385957	0.0578967	0.149569	0.0435242	0.0197836	0.00657938	0.0252519	0.0451855	0.0146258
GSM990364	64	0.0181478	0.169008	0.00505259	0.0230485	0.0111721	0.0140208	0.130884	0.143787	0.0176516	0.00205617	0.0211541	2.95579e-05	0.127586	0.00704418	0.243591	0.18444	0.0341853	0.173279	0.0240696	0.0359397	0.0608628	2.95579e-05	2.95579e-05	0.00858245	2.95579e-05	0.160174	0.12038	0.0122752	0.0279912	0.0085494	0.00908563	0.173391	0.248863	0.249468	2.95579e-05	0.0970742	0.0219841	2.95579e-05	0.0786635	0.0324552	0.0682686	0.170082	0.0244433	0.0223609	0.00286665	0.00234874	0.0881999	0.0187197
GSM990370	64	0.0104671	0.112681	0.00700006	0.00715464	0.00932526	0.0208759	0.0471363	0.097607	3.28794e-05	0.0108176	0.0217209	0.00155717	0.166119	0.0238303	0.103449	0.0495459	0.0229916	0.104178	0.0254545	0.0180976	0.0373665	0.0150631	0.0356817	0.00382296	0.00597339	0.129229	0.0325869	0.0177709	0.0205228	0.00534436	0.0135594	0.0370003	0.16992	0.187652	0.00413042	0.0968254	0.0553946	0.000433049	0.0593238	0.04992	0.0689958	0.12149	0.0436216	0.0487691	3.28794e-05	0.00753931	0.077358	0.0164752
GSM990401	64	0.00425977	0.0565515	0.00802003	0.00175891	0.00842573	0.0330119	0.0145016	0.0232858	0.00123278	4.9973e-05	0.0281426	4.9973e-05	0.0628091	0.0426387	0.129577	0.0456631	0.033077	0.0586332	0.0304759	4.9973e-05	0.0193643	0.0110215	0.023326	4.9973e-05	0.000389131	0.0484127	0.0272154	0.00636706	0.00878723	0.0280959	0.00445837	0.0214961	0.0849607	0.0566309	4.9973e-05	0.0340424	0.0134517	4.9973e-05	0.00314579	0.0403501	0.0693291	0.124824	0.045198	0.0229335	0.00310227	0.0107187	0.0748936	0.00881593
GSM990411	64	0.00830558	0.0809476	0.00383664	0.00411149	0.0165329	0.0201746	0.014569	0.0475765	0.00497698	3.76486e-05	0.0171355	0.0035843	0.110351	0.0095963	0.0883924	0.0539336	0.0221571	0.0712445	0.0266234	0.00181821	0.0269821	0.00926514	0.0351941	0.00215956	0.00304104	0.109232	0.0254029	0.0171711	0.00901963	0.0094254	0.0123607	0.0445805	0.1808	0.0934977	0.00154667	0.0769629	0.0485447	3.76486e-05	0.0393475	0.0331127	0.0658353	0.120888	0.0652637	0.0314281	3.76486e-05	0.00999436	0.0615606	0.0125099
GSM990498	64	0.0105365	0.103745	0.0115501	0.0221943	0.0157098	0.0214813	0.0472197	0.0804481	0.00955068	3.18627e-05	0.012127	0.00421982	0.146439	0.013482	0.109991	0.0412041	0.0297656	0.128634	0.0411549	0.00630846	0.0291225	0.00430492	0.00150558	0.00389048	0.00854616	0.102531	0.0433721	0.00856631	0.0229941	0.0171033	0.0212598	0.0352468	0.148119	0.211667	0.0114176	0.0659191	0.0480153	0.00128644	0.0415713	0.0623539	0.0686262	0.155258	0.0511896	0.0426231	0.00362143	0.00799533	0.0564679	0.0201744
GSM990608	64	0.00955051	0.0772705	0.00742589	0.00779304	0.0186041	0.0394502	0.0239271	0.0565416	0.000597981	0.0176321	0.0278404	0.00315242	0.159208	0.0215452	0.146118	0.077652	0.0176074	0.0482071	0.0467753	0.0166217	0.0450884	2.76665e-05	0.0233462	0.0193892	0.0127786	0.0712341	0.0309978	0.00966089	0.0398787	0.0237142	0.0188364	0.0271652	0.0922359	0.154471	0.00814605	0.0793726	0.00657783	0.00579247	0.0108369	0.0522417	0.0793363	0.135022	0.0364046	0.0037856	0.00201155	0.00265672	0.0830425	0.0523612
GSM990618	64	0.00646134	0.133749	0.0125333	0.00899435	0.0255306	0.02602	0.0404598	0.0836456	0.00714077	0.0207118	0.0255762	0.000894084	0.177002	0.022339	0.136097	0.153685	0.0380803	0.18971	0.0492344	0.031936	0.0398426	3.77534e-05	3.77534e-05	0.0182423	3.77534e-05	0.141169	0.0421129	0.0135986	0.0217882	0.0272205	0.0132629	0.0377449	0.182679	0.279403	0.00859228	0.0958607	0.0356002	0.00303408	0.0386742	0.053918	0.0937304	0.138907	0.0879241	0.0447767	0.0039743	0.00953652	0.0816781	0.00158623
GSM989841	63	0.00545387	0.075024	0.00740052	0.0223492	0.0202508	0.0359407	0.0187249	0.0558455	0.00899192	0.0188226	0.0430126	0.0126398	0.0994664	0.0223736	0.096181	0.0430308	0.0430739	0.0546052	0.0318709	0.0116271	0.0535599	0.015543	0.00214841	0.00729543	0.00991677	0.0549767	0.038388	0.0150154	0.0265967	0.0261409	0.0142514	0.0260653	0.0750336	0.154377	0.00727709	0.0555167	0.0201612	0.00309218	0.0334875	0.0483532	0.0982243	0.163325	0.0397893	0.0236218	0.00494794	0.0132846	0.0702513	0.0403578
GSM989906	63	0.0143706	0.108744	0.0116197	0.00280862	0.0201279	0.0165093	0.0153488	0.0374014	0.0111816	3.63824e-05	0.0243691	3.63824e-05	0.103329	0.0176864	0.132003	0.0332916	0.0305697	0.0590624	0.0467657	0.0178512	0.0405948	0.0119564	0.0206612	0.0160652	0.0064545	0.0588143	0.0334387	0.0122526	0.0164036	0.0240419	0.0169339	0.0260712	0.0860578	0.141254	0.0073628	0.0561687	0.0126152	3.63824e-05	0.0142216	0.0441471	0.078917	0.139398	0.0340735	0.0208393	3.63824e-05	0.0205036	0.0808698	0.0343105
GSM989919	63	0.00536497	0.0765944	0.0116711	0.00421008	0.01943	0.0269367	0.020224	0.0366304	3.19981e-05	0.00581949	0.0560591	0.0109304	0.100141	0.0213009	0.0995483	0.0546607	0.0408102	0.042505	0.037416	0.00756513	0.0297668	0.0145229	0.00254226	0.0178531	0.0100928	0.0472679	0.0405053	0.0118442	0.0143753	0.0579846	0.0139687	0.0259866	0.0910578	0.0820126	0.00995823	0.0335195	0.0183051	0.00202689	0.0245905	0.0514536	0.0914434	0.155203	0.0600968	0.0235061	0.00341888	0.0246804	0.0647403	0.0151713
GSM989931	63	0.00812888	0.155853	0.0131343	0.00417419	0.0170127	0.019352	0.0775038	0.0795522	0.00614192	0.0244327	0.0185234	9.30371e-05	0.138999	0.0179428	0.109704	0.0459283	0.0395097	0.146591	0.0671986	0.0338759	0.0508556	0.00832496	0.0340383	0.0127743	0.00601606	0.139915	0.0526786	0.0120963	0.0184099	0.0102722	0.00685671	0.0313379	0.172745	0.24343	0.000163548	0.118323	0.0457953	0.016629	0.0499256	0.0513521	0.0682245	0.20078	0.0526373	0.0596064	0.00948872	0.0170653	0.0935747	0.0176994
GSM989950	63	0.0112086	0.11278	0.00781921	0.0188156	0.0221403	0.023964	0.0159007	0.0677057	0.013291	0.0179333	0.0369494	0.00272471	0.142264	0.0163403	0.0657668	0.125579	0.0263864	0.138399	0.0513258	0.0304724	0.053637	0.00473826	0.091628	0.0145487	0.00784399	0.0748935	0.0430638	0.0119943	0.0199445	0.0400347	0.0154387	0.0420622	0.226334	0.232959	0.0121234	0.105496	0.0246562	0.00474209	0.0333736	0.0514616	0.0850756	0.172282	0.0617458	0.0599028	0.00297658	0.0111128	0.090888	0.0229743
GSM989986	63	0.010001	0.0823639	0.000868817	0.00089617	0.0200782	0.0267072	0.00272385	0.058651	0.0220208	0.00401902	0.0397412	0.0110141	0.0795244	0.0197887	0.116842	0.0258636	0.0417335	0.0462979	0.0372418	0.00637677	0.0379289	0.0118169	0.00600986	0.0152631	0.0116137	0.0541531	0.0302555	0.0160804	0.0173188	0.0372485	0.0167835	0.0224321	0.0611866	0.139388	0.0151044	0.0396674	0.00714758	0.00270988	0.0156405	0.0534188	0.088295	0.158198	0.0410765	0.0241478	0.00439991	0.00962361	0.0742883	0.0323873
GSM990009	63	0.013639	0.0664646	0.0126601	0.0119971	0.0112678	0.0180819	0.0163665	0.0789719	0.00241189	3.93143e-05	0.0237433	0.00134215	0.126856	0.0136614	0.147302	0.0512305	0.0451115	0.10814	0.0430462	0.0100131	0.0569342	0.00537564	0.0819998	3.93143e-05	0.0148986	0.070677	0.0570571	0.0191669	0.0223474	0.0141837	0.00701732	0.0238339	0.100514	0.188868	3.93143e-05	0.0623498	0.0339853	0.000853022	0.0373879	0.0538358	0.0828268	0.133327	0.0425321	0.0205133	0.00904604	0.010992	0.0790795	0.0084349
GSM990037	63	0.0111834	0.0879964	0.0109016	0.0129789	0.0136521	0.0281237	0.0325072	0.0779724	0.01685	0.013561	0.0285713	0.00489609	0.103794	0.0166593	0.163976	0.05474	0.0415568	0.0676446	0.0394529	0.0165139	0.0646013	0.0128756	0.0267036	0.00809593	0.00977778	0.0494249	0.0311964	0.0105071	0.0214576	0.0269488	0.01791	0.0383108	0.105175	0.178608	0.0139541	0.0605664	0.0304389	0.00554218	0.0497086	0.0486597	0.0670633	0.133223	0.0214705	0.0296037	0.0102401	0.0151555	0.0763062	0.0531535
GSM990273	63	0.0123172	0.0966272	0.0114378	0.0140477	0.017496	0.0162269	0.0672732	0.0979491	0.00546715	3.65236e-05	0.00980131	0.00224605	0.11694	0.0215419	0.105791	0.0301442	0.0286272	0.0763507	0.0532989	0.0204313	0.0474179	0.00711499	0.0206509	0.00475423	0.0114649	0.117043	0.032796	0.0146644	0.0265366	0.00974678	0.0122064	0.0704377	0.102989	0.11108	0.0179155	0.0565451	0.0152317	0.00526826	0.0216541	0.0756895	0.068167	0.13255	0.0681948	0.0331002	0.00428717	0.00950402	0.0470314	0.0208556
GSM990301	63	0.0030448	0.0882351	3.17823e-05	0.00922937	0.0090455	0.0141397	0.0256922	0.0650805	0.010433	0.0136363	0.0300936	0.00433793	0.146563	0.0207947	0.120365	0.0485044	0.0419811	0.0803412	0.0385273	0.00784949	0.0399998	4.83277e-05	0.000985885	0.00053296	0.00854699	0.114729	0.0464703	0.0127224	0.0189527	0.0139355	0.00911058	0.0186637	0.145744	0.175012	3.17823e-05	0.0723791	0.0122125	3.17823e-05	0.0340638	0.0576441	0.0731734	0.13856	0.0715343	0.0404944	0.000430972	0.00857437	0.0719281	0.0173531
GSM990306	63	0.00687571	0.130724	0.00207779	0.0107068	0.0148458	0.0117365	0.0893346	0.0995166	0.0136221	0.0117673	0.0250289	0.0120462	0.130784	0.00765797	0.0768811	0.0525839	0.0192012	0.116921	0.0640085	0.00814454	0.0427331	0.00790256	0.000116124	3.84772e-05	0.013502	0.103823	0.0333138	0.0138351	0.0295472	0.0184525	0.00698951	0.024981	0.193827	0.17857	0.0162034	0.102185	0.0130195	0.0012348	0.0351441	0.0144328	0.0641145	0.146562	0.0520512	0.033588	3.84772e-05	0.0114233	0.0706712	3.84772e-05
GSM990360	63	0.00452157	0.11649	0.00673462	0.00249466	0.00952968	0.0151914	0.088944	0.144715	2.97702e-05	0.0220507	0.0256805	2.97702e-05	0.241344	0.0140366	0.114571	0.0873358	0.0390236	0.149174	0.0566694	0.0266224	0.0587227	0.00505839	0.0508041	2.97702e-05	2.97702e-05	0.154854	0.0455377	0.0064022	0.00718352	0.00614574	0.0108988	0.0313253	0.174348	0.134256	0.0879052	0.105765	0.0239646	0.00323732	0.0647629	0.0365383	0.0733622	0.12995	0.0400398	0.0458658	2.97702e-05	0.0034303	0.0978018	0.0156606
GSM990366	63	0.00160018	0.226172	0.00661669	0.0457527	0.00740029	0.0189728	0.159063	0.132081	2.78993e-05	2.78993e-05	0.0506923	0.00210981	0.192484	0.0180985	0.0813534	0.0717133	0.0236233	0.260559	0.0499047	0.0230291	0.0663194	0.00460387	0.000601401	0.0360932	0.00970568	0.204425	0.0599169	0.0153427	0.0313251	0.00588349	0.00358919	0.065574	0.222563	0.266004	2.78993e-05	0.148409	0.100672	2.78993e-05	0.0599487	0.0397978	0.0464664	0.136319	0.0870475	0.0766574	2.78993e-05	0.0116651	0.1081	0.0159404
GSM990385	63	0.00861896	0.14087	0.0163271	0.0229015	0.0114999	0.0171652	0.0476109	0.112407	0.0094977	0.0223861	0.0112713	0.00114426	0.132962	0.0198819	0.201829	0.0894998	0.030429	0.094661	0.0555431	0.0377802	0.0756982	0.00756431	0.0334722	0.00822807	0.0124993	0.159516	0.10341	0.0166846	0.0213854	0.0155637	0.0142281	0.0376992	0.176491	0.242286	0.0208041	0.0962814	0.037236	0.00200474	0.0457674	0.0423763	0.0678972	0.174989	0.0678076	0.0516964	0.00821341	0.0144589	0.0684046	0.0175933
GSM989831	62	0.011546	0.0580704	0.00389895	0.00484157	0.0327342	0.0440777	0.0166435	0.0398753	0.00528345	0.0135275	0.0171745	0.00500927	0.0890387	0.0220506	0.13805	0.0518518	0.0412659	0.0731316	0.0456113	0.00854094	0.0375419	0.0166424	0.0103143	0.0178687	0.015308	0.0549892	0.0364192	0.012738	0.0265246	0.0203605	0.00973981	0.0101889	0.0638775	0.131675	0.010787	0.0466495	0.00144463	0.00731363	0.0175411	0.0633065	0.0795693	0.131981	0.0142294	0.0178476	0.0072957	0.0197582	0.084339	0.0381747
GSM989889	62	0.00349234	0.0974775	0.00281228	0.0238272	0.0249285	0.0442724	0.114115	0.0846135	6.59352e-05	6.59352e-05	0.0084457	0.00342317	0.14823	0.0103555	0.150738	0.0547323	0.00897862	0.134674	0.0227356	6.59352e-05	0.0547573	0.0397111	0.023891	0.0206472	0.0343596	0.138207	0.0816029	0.00415563	0.00637014	0.0110339	0.0290938	0.0450253	0.0915765	0.144575	0.0231098	0.126709	0.0276108	0.00484423	0.0187043	0.0335383	0.0513989	0.22652	0.0693418	0.0324622	6.59352e-05	0.0169953	0.0747492	0.0601952
GSM989892	62	0.0135568	0.164753	0.0138311	0.0282022	0.0223198	0.0299639	0.170547	0.124443	0.00652579	0.0412938	0.0326601	0.00115924	0.228003	0.0139565	0.20044	0.109611	0.0290475	0.203289	0.0503275	0.0310912	0.0948695	0.0162513	0.0016235	0.0250451	0.0101497	0.174579	0.102369	0.0168972	0.0213633	0.023408	0.0047825	0.0384963	0.251015	0.300483	0.0198545	0.145172	0.0496038	0.00263074	0.0748033	0.0453351	0.0849294	0.19446	0.139879	0.0524917	0.00737874	0.0146799	0.126732	0.0530406
GSM989939	62	0.00631547	0.176385	0.00572537	0.0288411	0.0127469	0.0230684	0.0917389	0.11902	0.00316959	0.0246752	0.0274733	0.00795077	0.14352	0.011554	0.150314	0.0842979	0.0418986	0.212342	0.0456502	0.030684	0.0479538	0.0105479	0.0246774	0.0185811	0.0134521	0.128149	0.0810666	0.0112065	0.0247282	0.0166636	0.0267076	0.0475507	0.198527	0.183904	0.0202267	0.107006	0.0384883	0.0027837	0.0628422	0.0443261	0.0770712	0.186973	0.0986068	0.0331441	0.00327984	0.00841637	0.0702932	0.0241303
GSM989949	62	3.40785e-05	0.0683882	0.000567043	0.00286307	0.0102376	0.0163243	0.0201712	0.0297353	0.00123167	3.40785e-05	0.0254861	3.40785e-05	0.0840575	0.0127823	0.114112	0.0498027	0.0209719	0.0387787	0.0283082	3.40785e-05	0.0288024	0.00940029	3.40785e-05	0.00346539	0.00499445	0.0536893	0.0300797	0.0105781	0.0209183	0.0176384	0.0177481	0.025438	0.0448784	0.0497008	3.40785e-05	0.0351114	0.00626753	3.40785e-05	0.0214171	0.0349782	0.0627243	0.126373	0.0307296	0.0233568	0.00194396	0.00727951	0.0538001	0.0171855
GSM990057	62	0.0132086	0.0578582	0.0100895	0.00601555	0.0205241	0.0237724	0.0319372	0.0524047	0.0142325	0.010768	0.0223648	0.00982123	0.128293	0.0216511	0.137959	0.0472689	0.0454349	0.0868543	0.0213083	0.0286473	0.0423768	0.00669455	0.0299679	0.0105566	0.00883743	0.0725995	0.040889	0.0136576	0.0201119	0.0208128	0.0153335	0.0294918	0.106364	0.177779	0.00872172	0.0437801	0.00789718	0.00177445	0.026412	0.0720376	0.0727849	0.142115	0.0279764	0.00839835	0.0081745	0.0189863	0.0650844	0.0282568
GSM990073	62	0.0170626	0.131686	0.014139	0.00548766	0.0120462	0.0287	0.0992075	0.068769	0.00614587	0.0170858	0.047628	0.00998038	0.220968	0.036853	0.148515	0.0626676	0.0261085	0.131955	0.0636685	0.0323634	0.0673905	0.0110443	0.0184139	0.00432477	0.00405796	0.144891	0.0381297	0.018745	0.0203624	0.0534585	0.0113355	0.0367379	0.169851	0.190951	0.000836836	0.0954836	0.0406836	0.00735956	0.0577556	0.0537666	0.0655706	0.162833	0.0469773	0.0410671	0.0131644	0.0171473	0.0701585	0.0314154
GSM990106	62	0.00492551	0.121685	0.0131555	3.30448e-05	0.00256134	0.021485	0.106661	0.149006	0.0120448	0.012489	0.0655332	0.00600691	0.170504	0.0179713	0.103556	0.070608	0.0213471	0.231282	0.075913	0.0521197	0.0507806	3.30448e-05	3.30448e-05	0.00943069	0.0024468	0.214105	0.0672521	0.0145511	0.0147214	0.0126143	0.00900914	0.0717572	0.195354	0.207844	0.0101682	0.114312	0.104757	0.00177806	0.0794286	0.0289501	0.0668935	0.171698	0.117434	0.0913343	3.30448e-05	0.00948803	0.0626727	0.0252055
GSM990113	62	0.00622753	0.125929	0.0052579	0.00881121	0.0174419	0.0193299	0.0896978	0.129559	0.00962613	3.9453e-05	0.0282426	0.00217399	0.169862	0.0195632	0.126485	0.100843	0.0360405	0.151269	0.0443772	0.053522	0.0729156	0.00428861	0.00260862	0.0553187	0.00118306	0.130325	0.0610603	0.0160357	0.0302131	0.0153767	0.0069328	0.0736655	0.16624	0.20083	3.9453e-05	0.122852	0.0503005	0.001995	0.0340502	0.0565465	0.0740489	0.161009	0.071574	0.0637081	0.00650066	0.00400437	0.0760437	0.00759875
GSM990290	62	0.0052087	0.124438	0.0166751	0.00565879	0.00602202	0.0194825	0.15034	0.0665522	0.00897517	2.98118e-05	0.0296164	0.0276933	0.166698	0.0130297	0.0842241	0.0753373	0.0256387	0.129543	0.0306621	0.0179292	0.0621266	0.00690691	0.0029596	0.00991198	0.0046433	0.100905	0.0339658	0.0105283	0.0219578	0.0150855	0.0169498	0.0530883	0.106787	0.113638	0.0123841	0.0858821	0.0427018	2.98118e-05	0.0167277	0.0454868	0.0702136	0.129698	0.105458	0.0519001	0.00309036	0.00992533	0.0491938	2.98118e-05
GSM990347	62	0.0119234	0.0829231	3.45652e-05	0.0167299	0.0103709	0.0222407	0.0191915	0.0337568	0.0132368	0.00153756	0.0158959	0.00493374	0.0783132	0.0244852	0.159592	0.0515499	0.0226219	0.0755059	0.0395424	0.0151376	0.051934	0.00302474	0.020035	0.0195018	0.00104146	0.0384685	0.030977	0.0124348	0.0137823	0.0110799	0.00651186	0.0308728	0.0969976	0.15878	0.00775398	0.0480308	0.0187644	3.45652e-05	0.039496	0.0524768	0.0594131	0.125123	0.0222227	0.0134893	0.00243992	0.0248968	0.0410699	0.0332087
GSM990358	62	0.0136426	0.186333	0.00405441	0.0051502	0.0092378	0.00854986	0.0276814	0.121544	2.66415e-05	0.00961103	0.0193403	2.66415e-05	0.232286	0.00960974	0.0738822	0.0160266	0.0149374	0.312896	0.0158356	0.0407177	0.0658377	0.00197891	2.66415e-05	0.000213901	0.00648243	0.246669	0.042788	0.012963	0.037334	0.021853	0.0116103	0.0486251	0.222507	0.275493	0.00591474	0.0776754	0.0847816	2.66415e-05	0.0128093	0.0460915	0.0616875	0.134195	0.078278	0.0187794	0.0100173	0.023728	0.0617548	0.00622976
GSM990359	62	3.00751e-05	0.109331	9.75417e-05	0.00141999	0.00566855	0.0251041	0.0224466	0.0923699	3.00751e-05	0.0198736	0.00944949	3.00751e-05	0.190754	0.00269234	0.124933	0.0855135	0.0465137	0.0799273	0.0344168	0.0105932	0.0338248	0.0028582	0.0517263	0.00732757	0.00348957	0.0785458	0.0358047	0.0176951	0.0146571	0.00838334	0.0107476	0.0303774	0.1442	0.0878614	3.00751e-05	0.0663536	0.0283941	0.00110114	0.019141	0.054137	0.0768687	0.181471	0.0697429	0.0442509	3.00751e-05	0.00930045	0.0740031	0.00631243
GSM990379	62	0.00733323	0.089892	3.69189e-05	0.00383725	0.0097166	0.0234249	0.0256074	0.07331	3.69189e-05	0.00988631	0.0106963	0.00824792	0.16014	0.00646255	0.056333	0.0627294	0.0303062	0.0441199	0.0181843	0.0308374	0.0153066	0.00210965	0.0219424	0.00515354	0.00741501	0.0395328	0.0404739	0.00499425	0.0176047	0.0140864	0.0167372	0.0186006	0.0785769	0.102289	0.00564476	0.0768771	0.0189994	0.00522959	3.69189e-05	0.0528853	0.0673008	0.131336	0.0461459	0.0232298	0.0066955	0.0078947	0.0620273	0.00410777
GSM990533	62	0.0183169	0.0636212	0.012483	0.0108234	0.0220691	0.0291407	0.00405049	0.0697052	0.0233086	0.0317049	0.0725377	0.0118707	0.149203	0.0300252	0.124796	0.112059	0.0373937	0.0639669	0.0448956	0.0201834	0.0545651	0.0159173	0.0310161	0.015882	0.0195614	0.0502095	0.0519218	0.0189218	0.0284964	0.0355226	0.0262607	0.0366377	0.0741784	0.142554	0.00244173	0.0507396	0.0235686	0.00770021	0.0418606	0.078153	0.0878608	0.134705	0.0594794	0.0279738	0.0143314	0.0165337	0.0789697	0.0327241
GSM989971	61	0.00676623	0.0621513	0.00290203	0.00548795	0.0143182	0.0144756	0.0281246	0.0409809	0.0059455	0.0131474	0.0160343	3.43187e-05	0.0769683	0.0166952	0.0854934	0.0396072	0.0133084	0.073178	0.0334942	0.0107923	0.0193402	0.0143419	0.0143467	0.00457231	0.0065326	0.0441027	0.0285829	0.00833975	0.0187065	0.0195371	0.0161186	0.0289907	0.116563	0.135713	0.0114986	0.0547691	0.0193645	3.43187e-05	0.0312108	0.0359487	0.0373338	0.126353	0.0385555	0.0234132	0.000865906	0.00685958	0.0513461	0.0189151
GSM990114	61	0.00617396	0.0701233	0.00183286	0.00729831	0.0072686	0.00750002	0.0150898	0.0453431	0.0129158	3.23665e-05	0.00838881	3.23665e-05	0.140572	0.0105326	0.0958631	0.0423272	0.0269317	0.0741304	0.0144005	0.0208256	0.0534465	0.00309381	0.000750524	0.00948466	0.00807726	0.0853593	0.0357095	0.0127296	0.0151642	0.0212221	0.00972301	0.020504	0.110368	0.17812	0.00579318	0.056961	0.0568813	0.000532975	0.0397507	0.0401887	0.063629	0.141453	0.0188059	0.0531375	3.23665e-05	0.00677887	0.0857131	3.23665e-05
GSM990287	61	0.00483125	0.172318	0.0171023	0.00380271	0.00517802	0.0177948	0.0249553	0.0914108	3.54006e-05	0.0212616	0.0696376	3.54006e-05	0.20263	0.0112338	0.0723611	0.054185	0.0279282	0.124646	0.0660967	0.0251454	0.0360024	3.54006e-05	0.000818051	0.000590688	0.00626615	0.128376	0.0543055	0.0145294	0.0509855	0.00663379	0.0163012	0.0255262	0.204789	0.136473	3.54006e-05	0.168989	0.0631432	0.00102043	0.0626187	0.0489387	0.0664892	0.142898	0.128555	0.0573687	0.00129	0.00875635	0.0856993	0.0311198
GSM990313	61	0.0206821	0.157471	0.0142789	0.0168686	0.0203101	0.0164318	0.0989261	0.142648	0.000171605	0.00193172	0.0160003	0.0176613	0.172177	0.0281261	0.174146	0.0625101	0.0233288	0.164247	0.0715315	0.0507204	0.0548674	0.0122703	0.00524402	0.00346307	0.0174786	0.0848803	0.0683664	0.024436	0.0281795	0.0183861	0.0186143	0.0583202	0.172636	0.210326	0.0361541	0.0881063	0.0497842	0.00256642	0.0543966	0.0619221	0.0639525	0.145725	0.0954857	0.0450761	3.92756e-05	0.0282035	0.0803539	0.00927739
GSM990315	61	0.00740951	0.141365	0.0186547	0.00807628	0.0147338	0.0154565	0.0686995	0.114839	0.00842479	0.0230649	0.0341556	3.45593e-05	0.16614	0.0149294	0.125963	0.0575634	0.0239417	0.125742	0.0749188	0.0381435	0.0615751	0.0106502	0.00147365	0.00236758	0.00299044	0.162566	0.0569419	0.00954134	0.0209014	0.0149883	0.000741286	0.0565403	0.122787	0.166313	0.00770895	0.130712	0.0385303	3.45593e-05	0.0905843	0.0524211	0.0639574	0.126649	0.0515271	0.0482372	3.45593e-05	0.0131457	0.0812439	0.019874
GSM990322	61	0.0102147	0.112892	0.00514315	0.0832349	0.0192814	0.019627	0.142263	0.162433	0.00996289	0.00584034	0.0291294	3.37256e-05	0.246518	0.0178041	0.0947642	0.102711	0.0277994	0.127208	0.0687472	0.0267198	0.061982	0.00844341	0.00115473	0.0193382	0.0115518	0.103308	0.0561835	0.00999708	0.0347352	0.0259327	0.0127037	0.0626378	0.161636	0.185685	0.0502046	0.102451	0.0621724	3.37256e-05	0.0536722	0.0563016	0.0795654	0.17854	0.0466903	0.051395	3.37256e-05	0.012686	0.0761636	0.0327624
GSM990336	61	0.00663949	0.117409	0.0119634	4.02535e-05	0.00297565	0.012253	0.0246565	0.142624	0.00945365	0.0126919	0.042174	4.02535e-05	0.146517	0.0198005	0.162115	0.0859629	0.0289145	0.105146	0.0752427	4.02535e-05	0.0501875	4.02535e-05	0.000565358	0.0106348	0.00248857	0.0661499	0.0410222	0.0104273	0.0263266	0.0190562	0.00862427	0.0413498	0.128216	0.208572	0.00145565	0.100632	0.0205334	4.02535e-05	0.0472389	0.0735465	0.0581237	0.102635	0.0395486	0.0280027	0.00475667	0.00196391	0.0454389	0.0137959
GSM990376	61	0.00241414	0.136402	0.00943713	0.0495072	0.00867583	0.0161173	0.0215978	0.0948416	3.87544e-05	0.00399062	0.0147151	3.87544e-05	0.116627	0.011321	0.143333	0.0558347	0.066425	0.0951083	0.0415083	0.0231182	0.0537629	3.87544e-05	0.0406965	0.00146869	0.0108541	0.0460729	0.0447898	0.0150857	0.0241792	0.00643497	0.0109729	0.0433558	0.185541	0.15985	0.0174447	0.07785	0.0199238	0.002999	0.0279356	0.0501181	0.0789897	0.150641	0.0613232	0.0314449	0.0010449	0.0122938	0.0713703	0.0194526
GSM990382	61	0.0100938	0.110986	0.0103959	7.53743e-06	0.00357138	0.00836329	0.045946	0.0501575	7.53743e-06	7.53743e-06	0.0304914	7.53743e-06	0.15482	0.0118743	0.0856369	0.1322	0.0324353	0.0919272	0.0441726	0.0241397	0.0666405	7.53743e-06	0.037937	0.00616826	7.53743e-06	0.0931575	0.0920009	0.00469747	0.0165355	0.0072851	0.00460922	0.0122816	0.169915	0.141333	7.53743e-06	0.0710125	0.0206041	0.00322106	0.0263937	0.0473673	0.0643218	0.125405	0.0785959	0.0424029	0.00121872	7.53743e-06	0.0591983	0.00230847
GSM990387	61	0.00941819	0.114556	0.00111739	0.0210515	0.01451	0.0244934	0.028763	0.0862827	0.00420307	3.22587e-05	0.0207621	0.0125793	0.206122	0.0168819	0.133702	0.0618908	0.0335822	0.110821	0.0476461	0.0162846	0.0237852	0.00380612	0.00263497	0.00412576	0.00997447	0.0544975	0.0527234	0.0177287	0.0176596	0.0175313	0.0146064	0.0292705	0.133562	0.10883	0.00950435	0.0636166	0.0203385	3.22587e-05	0.0322547	0.0585749	0.0540558	0.143064	0.019188	0.0323188	0.0051348	0.0209368	0.0715356	0.0210813
GSM990416	61	0.00422243	0.062063	0.00628226	0.0174669	0.0129953	0.0162842	0.00036235	0.0423567	0.00727121	1.05761e-05	0.0272019	0.0125379	0.0995119	0.027275	0.0848745	0.0799606	0.02629	0.0908178	0.0240444	0.00617952	0.0321528	1.05761e-05	0.00174131	1.05761e-05	1.05761e-05	0.0448726	0.043248	0.0146555	0.0145349	0.0293549	0.0104851	0.0256181	0.0873957	0.0881451	0.00456577	0.0730169	0.00372323	1.05761e-05	1.05761e-05	0.0262208	0.0912298	0.127427	0.0896433	0.0134013	1.05761e-05	0.0119312	0.0664839	0.0098275
GSM990452	61	0.00989766	0.10147	0.005046	0.0008951	2.8726e-05	0.020074	0.11469	0.0770576	0.000657362	0.0036064	0.0111247	0.00656411	0.129785	0.0150674	0.368904	0.0322188	0.0104398	0.118397	0.0358049	0.0101549	0.110719	0.00160912	0.012313	0.00827668	0.00255185	0.132827	0.0547557	0.0199385	0.0223556	0.00430996	0.00912471	0.0324738	0.264399	0.175432	2.8726e-05	0.0620396	0.0263097	2.8726e-05	0.0382888	0.0673989	0.0751823	0.155212	0.0448591	0.0441111	0.00259189	0.00748883	0.0615293	0.00504554
GSM990473	61	0.00378515	0.0378734	0.00604242	0.00879903	0.00650824	0.0177006	0.0189626	0.0650874	0.00390175	0.00998742	0.0167878	0.00791786	0.112496	0.016129	0.0993607	0.0553375	0.0137371	0.0719279	0.0260306	0.0439783	0.0280838	2.64545e-05	0.00437265	0.00741208	0.00428963	0.0732879	0.0268814	0.00123298	0.0170216	0.0138281	0.0214363	0.0218175	0.106415	0.113445	2.64545e-05	0.0554977	0.0270906	0.00527642	0.0152066	0.0439424	0.0683273	0.13764	0.0361449	0.0126559	0.00134577	0.0102979	0.0530583	0.0208149
GSM990626	61	0.00420754	0.099717	6.93857e-06	6.93857e-06	0.0114594	0.0260815	0.0212827	0.0824944	6.93857e-06	0.00510412	0.0113475	0.0025805	0.126674	0.0221562	0.0900227	0.0787009	0.0192718	0.180065	0.0486151	0.00636267	0.0478998	6.93857e-06	0.000662977	0.0122271	0.014935	0.0641212	0.0625877	0.0149244	0.0187264	6.93857e-06	0.0184072	0.0310301	0.139464	0.230723	0.0118994	0.0770383	0.0198191	0.00016739	0.0176589	0.0423762	0.0624043	0.13807	0.0220273	0.0344863	6.93857e-06	0.0122402	0.0778532	0.0165378
GSM989846	60	0.00405935	0.0692931	0.00617612	0.00946502	0.0170185	0.0239824	0.0169615	0.0371222	4.43636e-05	0.00281491	0.0256553	0.0029269	0.0804736	0.0223879	0.138055	0.0419413	0.0339812	0.0541633	0.0500066	4.43636e-05	0.0528559	0.013773	0.00120466	0.00772476	0.00725106	0.0572984	0.0284039	0.0146468	0.0101486	0.0229027	0.0109717	0.00991342	0.0589107	0.107766	0.0275599	0.0694378	0.00953153	4.43636e-05	0.0247623	0.0630055	0.0851912	0.150709	0.0197524	0.0319803	0.00233335	0.0290172	0.0744577	0.0430125
GSM989952	60	0.044579	0.0936167	0.00546093	3.73694e-05	0.0179127	0.028084	0.027033	0.0555117	0.00604692	0.0286356	0.0188075	0.0011772	0.0999266	0.0180599	0.11083	0.0332055	0.036053	0.0435179	0.0216463	0.0103394	0.0420543	0.0173782	0.0345606	0.00931381	0.00619088	0.0567107	0.0368488	0.0104628	0.0137097	0.022505	0.0119433	0.0342119	0.105279	0.107262	0.00798807	0.0549493	0.0183848	3.73694e-05	0.0309693	0.0410802	0.0675845	0.141349	0.0257024	0.016981	0.000243366	0.00985016	0.0727956	0.0298938
GSM990053	60	0.020171	0.0827555	0.00609117	0.0131068	0.0187263	0.0271426	0.0277626	0.0492666	0.0174438	0.0238331	0.0166819	0.0205501	0.0877552	0.0137374	0.0817389	0.115005	0.0473071	0.0841134	0.0356604	0.0166776	0.0671319	0.0202785	4.41904e-05	0.00380784	0.0293709	0.0563556	0.0399845	0.0196738	0.0216017	0.0174788	0.0212254	0.0498762	0.12608	0.149538	0.00241	0.0665391	0.0203261	0.00724758	0.0339848	0.0611005	0.0723462	0.171307	0.0277426	0.0281757	0.00594595	0.0163088	0.0699308	0.0372033
GSM990076	60	0.00530994	0.0814343	0.0154506	0.0139362	0.0217401	0.021401	0.0386175	0.106556	3.44393e-05	0.0128341	0.0113641	0.00643349	0.124685	0.0255462	0.0984766	0.0703901	0.0257083	0.16234	0.0296203	0.00916017	0.035895	0.0140757	0.0133651	0.00846722	0.01461	0.088565	0.0470415	0.0219874	0.0177088	0.0326656	0.0263417	0.0331209	0.104968	0.090279	0.0154071	0.0765414	0.0257148	0.000971862	0.028297	0.0668727	0.0699165	0.126464	0.0251617	0.0233997	0.00772641	0.0173151	0.0464669	0.0150549
GSM990094	60	0.00511751	0.0842966	0.0119058	3.70483e-05	0.0176802	0.0271694	0.029383	0.0657155	0.0116013	0.000533256	0.0588325	3.70483e-05	0.0988105	0.0230378	0.221568	0.0497852	0.0410093	0.12212	0.0451421	0.00299275	0.0572134	0.00908673	3.70483e-05	0.0184989	0.00165347	0.0569897	0.0301337	0.00563897	0.0111425	0.0291621	0.0137577	0.0404448	0.0490059	0.128611	0.00337776	0.0631467	0.0438195	0.0039672	0.0187677	0.0534772	0.067753	0.121973	0.0707038	0.0106414	3.70483e-05	0.0155233	0.0575402	0.0140479
GSM990296	60	0.00923335	0.111736	0.0075145	3.03754e-05	0.0133287	0.02882	0.029536	0.0595502	3.03754e-05	3.03754e-05	0.0208733	3.03754e-05	0.111378	0.0143604	0.120839	0.0396381	0.0388358	0.126742	0.0513212	0.000517508	0.0326831	0.00851491	0.0208804	0.00721715	0.0021796	0.070871	0.070758	0.0106502	0.0128173	0.00411245	0.00537519	0.0433844	0.124216	0.103377	0.000328745	0.0635364	0.0323804	3.03754e-05	0.0113153	0.0452637	0.0756672	0.125209	0.0458091	0.0214898	3.03754e-05	0.0169368	0.052163	0.0183675
GSM990300	60	0.00827539	0.200988	0.015248	0.0177558	0.00579231	0.0195109	0.0302837	0.16221	0.0204156	0.0106833	0.0533717	0.00557748	0.202137	0.0164044	0.113951	0.0915661	0.0204993	0.172544	0.0579612	0.0275331	0.0582552	0.00742464	0.00517509	0.00763111	0.00874431	0.144021	0.0704602	0.0181453	0.0245992	0.0135105	0.00522362	0.0332313	0.19775	0.287218	0.0220873	0.0906559	0.0484049	0.00300483	0.0746392	0.0447746	0.0629345	0.198817	0.112623	0.0447346	0.00665823	0.00596535	0.109843	0.0155304
GSM990304	60	0.0154553	0.121738	0.00979496	0.0732259	0.0151443	0.0259582	0.0985123	0.139234	0.0147001	0.0246253	0.0459214	0.00117273	0.181746	0.0240869	0.14872	0.13225	0.0194862	0.197478	0.0571092	0.0303476	0.0736359	0.00437143	0.0286201	0.00248923	0.00917449	0.146927	0.0643222	0.020361	0.044561	0.0159709	0.0172872	0.043549	0.170561	0.195844	0.00461854	0.103095	0.0562373	0.00577274	0.0451158	0.0470767	0.0738926	0.1666	0.0698477	0.0613975	0.00267211	0.0136391	0.124811	3.25612e-05
GSM990342	60	0.000339783	0.0383916	0.00827227	0.00815518	0.00326266	0.0101725	0.017261	0.0281167	0.0134203	0.0102757	0.00549947	1.36795e-05	0.0882899	0.0177456	0.108306	0.0207439	0.00768965	0.128577	0.0296365	1.36795e-05	0.0315448	0.010745	1.36795e-05	0.0140638	1.36795e-05	0.0745165	0.0206061	0.012008	0.0218422	0.018587	0.0183746	0.0393861	0.0574446	0.15521	1.36795e-05	0.0708655	0.00921593	0.00422344	0.0596917	0.0167719	0.0531216	0.114677	0.0132124	0.00986125	1.36795e-05	0.0266568	0.0374945	0.0133065
GSM990362	60	0.00648445	0.162559	0.0175343	0.0178098	0.017255	0.0170414	0.308961	0.169572	0.0181646	0.00231407	0.0156894	0.0142886	0.189435	0.0129163	0.125333	0.0491005	0.0331908	0.18354	0.0618092	0.040747	0.0605076	0.0072381	0.00508529	0.0126946	0.00257666	0.122087	0.0599061	0.0146012	0.024385	0.0144189	0.011545	0.060833	0.228829	0.247707	0.00960109	0.142591	0.0435562	0.00225137	0.0763673	0.0524157	0.0683274	0.166275	0.079301	0.0978987	0.00571096	0.0160039	0.105717	0.0295549
GSM990419	60	0.0136217	0.0764204	0.00311136	0.0202217	0.00659555	0.0200741	0.0159085	0.0603424	4.31512e-05	0.0060157	0.0133467	4.31512e-05	0.0854065	0.0501615	0.128055	0.0757291	0.0255653	0.0780696	0.0457128	0.00244559	0.0255592	0.0181153	4.31512e-05	4.31512e-05	0.0121309	0.0420954	0.037466	0.00231363	0.0132019	0.0169009	0.00539608	0.0159893	0.0646954	0.0519203	4.31512e-05	0.0519998	0.0222869	4.31512e-05	0.000662484	0.0233116	0.071223	0.117627	0.0223024	0.0203767	0.00762568	0.00373405	0.0536292	0.00747489
GSM990451	60	0.00817011	0.0786637	0.00407684	0.0129948	0.01178	0.024411	0.0225718	0.0720081	0.00666802	3.15424e-05	0.0180853	0.00132883	0.138659	0.0199538	0.0890009	0.0224426	0.023286	0.0673659	0.0362763	0.00757159	0.0328763	0.000660877	0.0021278	0.00254746	0.00614117	0.092896	0.0704239	0.00623872	0.0111178	0.0136066	0.00857818	0.015334	0.0967725	0.1128	3.15424e-05	0.0461827	0.00956621	0.00334744	0.0249507	0.0401141	0.069301	0.164093	0.078294	0.0227695	3.15424e-05	0.00471309	0.0645219	0.0116837
GSM990512	60	0.00316345	0.142147	0.012733	0.0400929	0.00959479	0.0292098	0.0788932	0.131033	0.0145492	0.0132872	0.0163648	0.011663	0.174195	0.00985647	0.103738	0.0808974	0.0251127	0.150232	0.088314	0.0418285	0.0315982	1.63605e-05	1.63605e-05	0.0221934	0.00595862	0.112878	0.0519274	0.00798446	0.0199791	0.00708535	0.000621293	0.0736052	0.249209	0.235703	0.0194428	0.165512	0.0486303	0.00460848	0.0407379	0.0524582	0.0857088	0.164605	0.0860407	0.0890755	1.63605e-05	0.00760613	0.0916934	0.0121466
GSM990514	60	0.00315051	0.0458562	5.08583e-05	0.000586736	0.0145589	0.00995719	0.00818555	0.041434	5.08583e-05	0.00505206	0.0127608	0.000641073	0.0797519	0.0112275	0.0499739	0.0686291	0.0206366	0.0440698	0.0151308	0.00638441	0.0227253	0.00587989	0.00941097	0.0117763	0.00883281	0.0680188	0.0280123	0.0151017	0.010164	0.0122516	0.0128764	0.0127461	0.0631319	0.0680576	5.08583e-05	0.0386484	0.000768535	0.0019709	0.0172838	0.0394421	0.0606412	0.120718	0.0157879	0.00569587	0.000416444	0.00997116	0.0299592	0.00467407
GSM989924	59	0.00080865	0.0875423	0.00676814	0.00190998	0.0148882	0.0269553	0.0154859	0.0457174	0.00345048	0.00472016	0.00900662	0.0148573	0.0701955	0.0227468	0.0860638	0.0135009	0.0273423	0.0369467	0.0296441	0.00219849	0.0301582	0.0210515	0.0172878	0.0106149	0.0122702	0.0513383	0.0414131	0.0146288	0.0157793	0.0145583	0.00891098	0.0117131	0.0705533	0.131906	0.00236561	0.0328893	0.0117619	0.0015793	0.0425775	0.0277073	0.0692945	0.158151	0.0259003	0.0196574	3.34522e-05	0.0032079	0.0617634	0.0222619
GSM989938	59	0.00873988	0.0779963	0.000260692	0.00593924	0.0190332	0.0172509	0.0148587	0.0398643	0.0101765	0.00261437	0.0295791	0.0140995	0.0882044	0.0138923	0.106187	0.0376844	0.0382997	0.0835311	0.0193296	0.00335752	0.0472432	0.0067729	0.00730679	0.0205396	0.00404926	0.0501187	0.0441469	0.0112341	0.0230891	0.0117655	0.0139332	0.0226417	0.0995818	0.189267	0.0187871	0.06811	0.0108261	0.00138768	0.017749	0.0453736	0.0791222	0.149681	0.0304694	0.0253398	0.0101569	0.00789177	0.0605593	0.0250876
GSM989943	59	0.00074947	0.0904368	0.00449844	3.79614e-05	0.0204682	0.0261318	0.00659155	0.0460652	3.79614e-05	3.79614e-05	0.000165201	3.79614e-05	0.0591438	0.0111207	0.116836	0.022579	0.0262712	0.0216214	0.0215192	0.0219646	0.0389413	0.00268119	0.00613385	0.00479265	3.79614e-05	0.0532944	0.0314596	0.00580057	0.0175724	0.00323617	0.00397705	0.0160423	0.0983393	0.170013	3.79614e-05	0.0624786	0.0050449	3.79614e-05	0.00687185	0.0349397	0.0656114	0.125567	0.0177341	0.0211697	0.00170772	0.00248582	0.0440994	0.00980899
GSM989946	59	0.00723699	0.124061	0.00363526	0.00378824	0.0210966	0.0170231	0.0265879	0.068016	0.00590331	0.0100628	0.0320465	0.00444107	0.112653	0.0198606	0.144332	0.0360649	0.0308016	0.0951484	0.0326565	0.0188185	0.0497568	0.013531	0.00969367	0.00230753	0.00953855	0.0977927	0.0367934	0.00752822	0.0189699	0.0138591	0.0214816	0.0279498	0.141501	0.147598	0.00356853	0.0589514	0.0297174	0.00324378	0.0564537	0.0683314	0.0735548	0.148599	0.0344589	0.0392464	0.00367184	0.0177368	0.094491	0.0271455
GSM989989	59	0.00272055	0.067138	0.0065371	0.00363415	0.015222	0.0207477	0.0179542	0.0561727	0.000291767	0.00514551	0.0280164	0.00971512	0.114369	0.0185153	0.122534	0.0618254	0.0274762	0.13851	0.0376803	0.0141023	0.0371098	0.00990538	0.00643618	0.017438	0.0143164	0.10471	0.0520595	0.0144928	0.0145974	0.0261705	0.0170391	0.0252511	0.0914932	0.163629	0.00810484	0.0849488	0.0106429	0.0071586	0.0196612	0.0448277	0.0821292	0.132709	0.0416519	0.00979582	0.0040473	0.0177582	0.0735678	0.0365854
GSM990116	59	0.0132205	0.0480447	0.0118926	0.00948478	0.0139116	0.0214114	0.0134156	0.0190235	0.00740353	0.00947141	0.013116	0.000489649	0.0769574	0.0206187	0.161717	0.0190469	0.037563	0.0307752	0.0345037	0.0102843	0.0286981	0.00334893	0.00413283	0.0084629	0.00769385	0.0380363	0.0285178	0.011666	0.0191607	0.0139336	0.0149738	0.017336	0.0338994	0.0504243	0.000590223	0.027204	0.00902913	3.55073e-05	0.013492	0.0622786	0.07082	0.121113	0.0131686	0.00453687	0.00226686	0.013859	0.0503152	0.0263404
GSM990302	59	0.00970437	0.154373	0.0121322	0.0162323	0.0201789	0.0183329	0.0539266	0.0600675	3.33208e-05	0.0256616	0.0321016	0.0189429	0.177954	0.0291185	0.181126	0.137947	0.0288814	0.185542	0.041666	3.33208e-05	0.0693184	0.00302666	3.33208e-05	0.00761121	0.0112653	0.174385	0.0445004	0.0189346	0.0206258	0.0110637	0.00904125	0.0367007	0.188693	0.172639	0.0097544	0.11863	0.0394993	0.00156595	0.0467893	0.0688021	0.0735279	0.13289	0.0623992	0.0463898	0.00831965	0.008245	0.0824064	0.0100393
GSM990316	59	0.00436582	0.120388	0.0262763	0.00393374	0.00836722	0.0173623	0.0352637	0.129376	0.00989774	0.0134296	0.0198967	0.00910201	0.208101	0.0160133	0.147052	0.119363	0.0218965	0.151263	0.0836541	0.0566628	0.0604798	0.00910938	2.98074e-05	0.00838606	0.00713412	0.146374	0.0346308	0.00971916	0.0452162	0.0165343	0.0134254	0.0681629	0.171202	0.182427	0.00565526	0.130865	0.0660531	2.98074e-05	0.042262	0.0553207	0.0555001	0.153728	0.0512761	0.0500613	2.98074e-05	0.00821274	0.0663281	0.0165572
GSM990320	59	0.0129544	0.103345	0.0143433	0.0185559	0.00851484	0.0194218	0.0815863	0.0790187	0.00693661	0.0141187	0.0316245	0.015374	0.1305	0.0193889	0.183033	0.0926618	0.0230983	0.079687	0.0540021	0.0252026	0.0553468	0.00704302	0.000347122	0.00524538	0.00917729	0.0816793	0.0538522	0.0187422	0.0209486	0.0211097	0.0132549	0.0383434	0.12959	0.0958066	0.00918288	0.102369	0.0404701	3.47821e-05	0.0324813	0.044626	0.0681345	0.136049	0.0557229	0.0508687	0.00584368	0.00276092	0.0651732	0.0234501
GSM990321	59	0.00634584	0.129752	0.0139125	0.0142726	0.0135129	0.0227816	0.0975031	0.0936301	0.00227435	0.0182366	0.0288017	0.0050187	0.15649	0.0177893	0.13222	0.0792525	0.0261824	0.130236	0.0420889	0.0412684	0.0495797	0.00524732	0.0753141	0.0136354	3.25777e-05	0.0927759	0.0326813	0.0114264	0.0292738	0.0212823	0.0206217	0.03921	0.156011	0.215971	3.25777e-05	0.109264	0.0311944	0.00214456	0.0721494	0.0475762	0.07484	0.128795	0.0402376	0.061793	0.0053558	0.0320841	0.0745997	0.0406982
GSM990328	59	0.0093543	0.152715	0.0018939	0.0709612	0.0192262	0.0193952	0.041578	0.127818	0.0108298	0.0118584	0.0285893	0.0101316	0.160486	0.011673	0.17913	0.0995758	0.0307893	0.162879	0.0414479	0.0306586	0.0574384	0.0153958	0.0142826	0.0156552	0.0109523	0.161856	0.0510287	0.0155271	0.0318302	0.0162922	0.0217063	0.0441353	0.200166	0.235128	0.0895907	0.110561	0.031733	3.51536e-05	0.0528333	0.0535966	0.0698951	0.151316	0.0771009	0.0217886	0.00585341	0.0120865	0.0910968	0.0102124
GSM990333	59	0.00856163	0.17037	0.00536148	0.0361517	0.0049857	0.0230032	0.0188278	0.083189	0.000233071	3.75092e-05	0.0300956	0.00283773	0.140524	0.0152257	0.156884	0.0571588	0.0349157	0.107855	0.0794776	0.0409144	0.0529961	0.00835925	0.0155209	0.0153714	3.75092e-05	0.110518	0.0474268	0.00851813	0.0347362	0.0132315	0.00841108	0.0859888	0.169096	0.22554	0.0126407	0.0886202	0.0192968	3.75092e-05	0.0823669	0.0242056	0.07286	0.166375	0.0796473	0.0504648	0.00124385	0.0259968	0.055198	0.0186543
GSM990338	59	0.00843164	0.110764	0.0276512	0.0107349	0.0114315	0.0227549	0.0575312	0.115035	0.0191183	0.0229761	0.0295345	0.0106633	0.131389	0.0239587	0.125069	0.146764	0.0210993	0.153419	0.00866153	0.0339449	0.0606025	0.00963409	0.00538741	0.00521176	0.0177827	0.072312	0.0710685	0.0206669	0.0142053	0.0159536	0.0236149	0.0436473	0.154165	0.175883	0.0114782	0.0649264	0.0215926	4.33574e-05	0.0583214	0.0434809	0.0810761	0.123768	0.0787326	0.0410655	0.00763236	0.00980073	0.0851795	0.0321175
GSM990352	59	0.0059191	0.108341	0.00342592	0.0307339	0.0149955	0.0230668	0.0136654	0.0649106	0.00625257	2.87875e-05	0.00994528	0.00255845	0.144347	0.00905359	0.0781189	0.0434533	0.0389778	0.0952994	0.0475435	0.0144493	0.0320581	0.00328153	0.0142715	0.0105149	2.87875e-05	0.0332609	0.0385706	0.0100612	0.0204615	0.0161656	0.0144878	0.0199745	0.100761	0.129321	2.87875e-05	0.0464639	0.0252085	0.00410683	0.0265891	0.0422494	0.0878918	0.135989	0.0141617	0.0189974	0.00882223	0.0160443	0.0454164	0.0184142
GSM990371	59	0.00562488	0.085695	0.003443	0.00235227	0.0153034	0.0145191	0.0558476	0.0485203	0.00835713	0.00370562	0.016719	3.05593e-05	0.0813829	0.017528	0.110883	0.0328685	0.0337245	0.0566783	0.0190419	0.0163625	0.0198135	0.00203169	3.05593e-05	0.00432565	0.0151874	0.0509696	0.0488569	0.011429	0.0239528	0.00770273	0.0092665	0.0203323	0.0973851	0.129942	3.05593e-05	0.0640369	0.0138527	3.05593e-05	0.0256386	0.0584163	0.0766677	0.171762	0.0614373	0.0211812	0.000193229	0.00651752	0.054251	0.0108501
GSM990386	59	0.0133931	0.0666055	0.0176158	0.00867991	0.0119425	0.0206572	0.0240283	0.0713662	0.00467414	0.00768093	0.0155025	0.00856881	0.127577	0.0183085	0.139702	0.0779223	0.0408053	0.172197	0.0201615	0.0171606	0.0361029	0.0144765	0.00843481	0.00932003	0.019776	0.0667497	0.0376437	0.0081231	0.0187496	0.0140176	0.0242236	0.0358135	0.142089	0.152569	0.00540656	0.0544904	0.023303	3.22864e-05	0.0227362	0.0418724	0.0725301	0.126298	0.0270764	0.0282845	0.00319242	0.010779	0.0598526	0.0130365
GSM990414	59	0.011439	0.122104	0.0179521	0.0179821	0.0203458	0.0266139	0.057537	0.124267	0.0121524	0.00727072	0.0361735	0.00683689	0.228408	0.0241644	0.131968	0.0716105	0.0333674	0.137415	0.0556808	0.0382868	0.0478288	4.46623e-05	0.0126414	5.45754e-05	0.00961819	0.120256	0.0609421	0.00565436	0.0247483	0.0249107	0.00857154	0.0395824	0.214664	0.13653	4.46623e-05	0.101104	0.0306508	0.0010311	0.0435672	0.0497397	0.0811704	0.149101	0.0751541	0.0343405	0.00562735	0.0127844	0.087881	0.0234426
GSM990436	59	3.31753e-05	0.0929866	3.31753e-05	0.0144302	0.0094789	0.0138243	0.0137692	0.0698685	0.00025855	0.00636573	0.00821111	3.31753e-05	0.115259	0.0211128	0.0611736	0.0888026	0.0485579	0.0862681	0.0318679	0.00238245	0.0295656	3.31753e-05	0.00327285	0.00644982	0.00143345	0.0761485	0.0514799	0.022585	0.00952579	3.31753e-05	0.0102537	0.0287871	0.13351	0.166306	3.31753e-05	0.0786363	0.0157488	0.00171897	0.00451518	0.0365343	0.0739018	0.138288	0.0511704	0.0229265	0.00151724	0.000515297	0.0884689	3.31753e-05
GSM990566	59	0.00683603	0.111234	0.0118477	0.00417599	0.0233808	0.0321939	0.0272656	0.0706645	0.00891096	0.0147849	0.0382886	3.47535e-05	0.161872	0.0246863	0.13507	0.0363441	0.0277995	0.115894	0.0602081	0.0201299	0.049465	0.00517994	3.47535e-05	0.0068759	0.00999411	0.0930925	0.0474624	0.0167031	0.0121247	0.0280908	0.0159489	0.0297988	0.128904	0.0679455	0.0067478	0.0954808	0.0224345	0.00420659	0.0178377	0.0732128	0.0933313	0.146529	0.0681311	0.0371937	0.00626157	0.00555949	0.0889289	0.0224817
GSM989961	58	0.00613358	0.0834459	0.00904009	0.0071278	0.0217838	0.0205908	0.0232653	0.10513	0.00472976	0.0211986	0.0247914	0.00810905	0.0871168	0.0210879	0.0700287	0.0554206	0.0314472	0.0373169	0.0399157	0.00864972	0.0580602	0.0206002	0.010804	0.0188946	0.014658	0.0545371	0.0359926	0.0122632	0.0115883	0.0226136	0.0127496	0.0266453	0.086174	0.181239	4.91272e-05	0.0469434	0.00843575	0.00323095	0.0188982	0.047339	0.081279	0.148817	0.0195375	0.0315741	0.00492507	0.00695368	0.0609769	0.0352287
GSM989962	58	0.00716642	0.0484222	0.010388	0.00493536	0.016546	0.0298871	0.0215151	0.0543404	0.00647893	0.0178696	0.0198719	3.72208e-05	0.106597	0.016138	0.159553	0.0386827	0.0313571	0.119513	0.0383365	0.0286974	0.0310561	0.0134957	0.00162614	0.0106625	0.00747122	0.0401321	0.0340249	0.00889336	0.0190081	0.023782	0.00959659	0.0219307	0.0730283	0.141083	0.0100011	0.0483893	0.0311009	0.000768272	0.0238971	0.0493608	0.0802711	0.151863	0.0283041	0.0167988	0.00512659	0.00890234	0.0690526	0.0284514
GSM989979	58	0.0118424	0.0591707	0.00283888	0.0066839	0.0186524	0.0152993	0.0584904	0.0486589	0.00857193	0.0179591	0.0122116	0.0114532	0.170886	0.0108314	0.112196	0.0829858	0.0281272	0.0821436	0.0410776	0.0138633	0.0373174	0.0122202	0.00847324	0.00532776	0.0166742	0.0524129	0.0453953	0.0145712	0.0196501	0.0313763	0.0113024	0.0310778	0.0815127	0.0980736	0.00276859	0.0541496	0.00929039	5.99314e-05	0.0102282	0.0522007	0.0694613	0.146375	0.0307139	0.0148819	0.00958918	0.0122877	0.124185	0.0291565
GSM990100	58	0.0182817	0.0687097	0.00919897	0.011184	0.0109082	0.0140523	0.0445578	0.11282	0.00877027	0.0147403	0.038504	0.00576783	0.11732	0.0224474	0.119641	0.0407442	0.0332257	0.115343	0.0498577	0.0264974	0.0590949	4.15444e-05	0.00225867	0.00472217	0.0191405	0.114231	0.053271	0.0133058	0.0129939	0.0110403	0.0130653	0.0320594	0.152507	0.156095	4.15444e-05	0.0847366	0.0568989	0.000403504	0.0218963	0.0639503	0.0737448	0.175309	0.0655355	0.0371278	4.15444e-05	0.0145499	0.0727918	0.0316551
GSM990272	58	0.0076146	0.120427	0.000759614	0.00822052	0.0143586	0.0189298	0.136282	0.12092	0.0121918	0.0238781	0.0212051	4.36758e-05	0.185923	0.021869	0.12493	0.0934278	0.0310729	0.190785	0.0558231	0.0453023	0.0547508	0.00249408	0.00200712	0.00646905	0.0138161	0.144269	0.0474337	0.020524	0.0330966	0.0122909	0.111331	0.0593535	0.193781	0.175035	0.0356277	0.161094	0.0137622	0.0165018	0.0442035	0.0410379	0.0650546	0.176978	0.0480759	0.0487641	0.00455987	0.0109085	0.0663923	0.00916811
GSM990286	58	0.0111059	0.122613	0.00592183	0.00282573	0.0104986	0.0113009	0.0292065	0.114288	3.37286e-05	0.0141104	0.0331132	0.00364122	0.132323	0.0196098	0.0809012	0.0392913	0.0350815	0.0436045	0.0230652	0.0302705	0.0264824	0.00489115	3.37286e-05	0.00404933	0.0123973	0.0844877	0.038698	0.00730097	0.0265547	0.0134581	0.00896906	0.0191822	0.127657	0.0812195	0.012695	0.0801744	0.012887	3.37286e-05	0.0231634	0.0529424	0.0739966	0.142012	0.0204812	0.0144848	0.00801744	0.0147385	0.0605098	0.00358555
GSM990298	58	0.0131148	0.0775817	0.00388969	0.00682511	0.00657261	0.0237743	0.0133026	0.0208661	0.0131729	3.30814e-05	0.0199036	0.00823359	0.0658248	0.0100775	0.0722095	0.0312169	0.0293134	0.0441455	0.018327	3.30814e-05	0.0299891	0.00326308	0.00295502	0.0086792	0.00286713	0.0522856	0.0327539	0.0063094	0.00875324	0.0115995	0.0122416	0.0170565	0.0650592	0.0974579	3.30814e-05	0.0467899	0.0276001	0.00226842	0.0128802	0.0312268	0.0683958	0.151932	0.0177724	0.0162753	0.000710778	0.0109788	0.0555384	3.30814e-05
GSM990334	58	0.014277	0.217876	3.85284e-05	0.000765576	0.0118195	0.0192007	0.0536832	0.108259	0.00583139	0.0102625	0.0364314	0.0155122	0.261025	0.0164941	0.148546	0.0954249	0.0211486	0.123406	0.0827706	0.0264706	0.0994921	0.0147767	0.00995357	0.00919589	0.00994068	0.175279	0.0668092	0.0124724	0.044977	0.0227102	0.00722549	0.149515	0.19577	0.291812	0.0228723	0.126075	0.0721946	3.85284e-05	0.0410762	0.0554015	0.0914526	0.178532	0.0687518	0.0453227	0.00312638	0.0126912	0.079409	0.0167451
GSM990339	58	0.0118726	0.100356	0.00758022	0.0103337	0.0249162	0.0262786	0.0324779	0.0722918	0.0198388	0.0129937	0.0230858	2.90482e-05	0.137667	0.0190704	0.103411	0.0453987	0.015913	0.112425	0.0498137	0.012022	0.0696937	0.00197835	0.0543508	0.0116653	0.00528188	0.0936946	0.0375009	0.0143703	0.0218727	0.020004	0.017593	0.0608678	0.159587	0.135796	0.00883123	0.0800125	0.0193148	0.00244826	0.0612406	0.0414709	0.0730418	0.129957	0.0283894	0.0222948	2.90482e-05	0.00446979	0.0584797	0.0238083
GSM990372	58	0.0126684	0.135727	0.0067731	0.0515306	0.0121534	0.016041	0.0975524	0.0830489	0.00124236	0.0109016	0.0324294	2.6105e-05	0.192451	0.0161092	0.155856	0.0796475	0.0315691	0.167742	0.0443725	0.0396722	0.0496232	2.6105e-05	2.6105e-05	0.00325845	0.0104708	0.0947394	0.0467909	0.0109491	0.0311513	0.00953251	0.00267093	0.0646942	0.166577	0.169288	2.6105e-05	0.140252	0.0549839	0.00159826	0.0297154	0.0522962	0.0666995	0.135569	0.080252	0.0482034	9.36344e-05	0.012857	0.109045	0.030584
GSM990374	58	0.00863445	0.0669681	0.00102314	0.00863936	0.0114286	0.01502	0.0277923	0.0360719	0.00638536	0.0207955	0.00272981	0.0046552	0.120757	0.0198597	0.110159	0.0627878	0.0265925	0.0898186	0.00174315	0.00703955	0.0362742	3.53077e-05	0.00475208	0.000230782	0.0141716	0.0376603	0.056566	0.0178915	0.0109405	0.0134492	0.00901546	0.011972	0.0669804	0.0445085	3.53077e-05	0.0290745	0.00667762	0.00195785	0.0151341	0.0641279	0.0753407	0.111688	0.00771552	0.012253	3.53077e-05	0.00857218	0.0667544	0.00166324
GSM990383	58	0.00758934	0.0847124	1.00492e-05	0.00351278	0.00871399	0.0197814	0.00357008	0.10998	0.00483115	0.0059505	1.00492e-05	0.00222555	0.164328	0.0343124	0.0578808	0.0558052	0.0272864	0.0871302	0.0390974	0.0304793	0.02042	1.00492e-05	1.00492e-05	8.0909e-05	0.0110825	0.106645	0.0368918	0.0145426	0.0126379	0.0147048	0.003689	0.0154843	0.0761795	0.128272	1.00492e-05	0.0298216	0.0171027	0.000946164	0.031232	0.031078	0.0699719	0.125786	0.0257819	0.00518427	0.00343691	0.0123997	0.033017	1.00492e-05
GSM990390	58	0.00424728	0.183673	0.00222447	0.0191588	0.0116534	0.0146041	0.111689	0.091292	2.70129e-05	0.0111002	0.0208238	2.70129e-05	0.211077	0.0172485	0.105404	0.202865	0.0240582	0.247298	0.0591682	0.0246054	0.0583253	0.00858877	2.70129e-05	0.0186765	0.0169556	0.193697	0.0650499	0.0147272	0.0723569	0.0145569	0.00580364	0.077629	0.253417	0.262511	0.0233154	0.135721	0.0325736	2.70129e-05	0.0652004	0.0481412	0.0770923	0.176517	0.0734951	0.0794312	0.00256719	0.00395928	0.104325	0.00603848
GSM990404	58	0.0105472	0.0337975	0.00252154	0.000379039	0.0164961	0.0149177	0.0140048	0.0192811	0.00967675	0.0129951	0.0132756	0.000930271	0.125397	0.00949144	0.104692	0.0402294	0.0344658	0.0280127	0.0567384	0.00739847	0.0309721	3.52587e-05	0.00153933	3.52587e-05	0.00365976	0.0277501	0.0266267	0.0215585	0.0131008	0.028782	0.0158599	0.0211785	0.0239997	0.0256005	0.00210438	0.0308737	0.00146873	0.0048711	0.0165674	0.0532714	0.0808258	0.128871	0.0249819	0.00559572	0.00470546	0.00894437	0.0534743	0.0211249
GSM990417	58	0.00372879	0.0334862	0.000309896	3.68469e-05	0.00523206	0.0175295	3.68469e-05	0.033988	0.00492877	3.68469e-05	0.0222519	3.68469e-05	0.10453	0.00893244	0.0678657	0.0515678	0.021786	0.0438327	0.0187918	0.000926613	0.0389691	3.68469e-05	0.00681348	0.00516698	0.00644338	0.0322688	0.0209496	0.0151708	0.0108761	0.0353549	0.00745757	0.000462188	0.0600082	0.0870859	3.68469e-05	0.0305224	0.00959988	3.68469e-05	3.68469e-05	0.0441489	0.068973	0.134288	0.0235874	0.0186851	0.000987692	3.68469e-05	0.0470775	3.68469e-05
GSM990458	58	0.0152551	0.0931573	0.00380447	0.0173517	0.0107004	0.0134781	0.0198432	0.141	0.00580493	0.0194737	0.00362194	0.00312565	0.148694	0.0228534	0.107257	0.136663	0.0212525	0.168093	0.0422067	0.0130029	0.0525057	3.04029e-05	3.04029e-05	0.0100337	0.00108184	0.159762	0.0472279	0.0137242	0.0319443	0.00986927	0.00808613	0.0332442	0.22955	0.0838323	3.04029e-05	0.107105	0.0239372	0.0055999	0.0756032	0.0346992	0.0877891	0.138994	0.0836907	0.0531972	0.000840967	0.00773046	0.0758611	0.00365847
GSM990543	58	0.00755232	0.0447741	0.00636928	0.00289931	0.023842	0.0255546	0.0139206	0.0415549	0.00563264	0.0195308	0.0503554	0.0033615	0.129523	0.0187905	0.131575	0.0359118	0.0382038	0.0638894	0.0393805	0.000417076	0.0273376	0.013724	0.00583299	0.020577	0.00382596	0.0364231	0.0371104	0.0184802	0.0149551	0.0550431	0.00914987	0.0235866	0.0641282	0.11334	0.00363175	0.0551055	0.00278676	0.00653761	0.0275582	0.0616891	0.0830304	0.143647	0.0286533	0.0192104	0.000405007	0.0212091	0.06758	0.0370144
GSM990600	58	0.00614034	0.0788925	2.70537e-05	0.0163519	0.0173055	0.0290133	2.70537e-05	0.129274	5.38747e-05	0.0199901	0.0166018	0.00500791	0.122015	0.0144439	0.190202	0.0331512	0.0245527	0.0370215	0.0376601	0.0101991	0.0558743	0.00287418	0.00641216	0.0198266	0.0103075	0.0710973	0.0237828	0.0227765	0.0197727	0.0111385	0.0170726	0.0196103	0.0819142	0.051819	2.70537e-05	0.0647192	0.0287574	2.70537e-05	0.0262661	0.0353022	0.0633138	0.149283	0.0194131	0.0309224	0.00949672	2.70537e-05	0.0739134	0.00847251
GSM989883	57	0.00927582	0.0612151	0.00783119	0.00835242	0.0156447	0.0247699	0.0136844	0.0568015	0.0110983	0.00125807	0.0219611	0.00128338	0.106138	0.0186658	0.127719	0.0445344	0.041648	0.0562657	0.0340594	0.0147107	0.0504713	0.0143803	0.00839239	0.00819069	0.00755924	0.0398279	0.0456631	0.0111316	0.0202091	0.0242391	0.0182356	0.0296005	0.0996382	0.133229	0.0153153	0.0456746	0.0186246	0.00563844	0.0190069	0.0418352	0.0547578	0.137065	0.0222962	0.0145133	0.00623237	0.0143031	0.12079	0.0424062
GSM990090	57	0.0102907	0.0699831	0.00882466	0.0181149	0.0194061	0.0223282	0.0436584	0.0869057	0.00993199	3.40791e-05	0.0286839	0.0182244	0.126732	0.0172926	0.0911095	0.048186	0.0421094	0.114188	0.051519	0.0484976	0.0405206	0.0115827	0.000883395	0.0179913	0.0100201	0.0976147	0.0390938	0.0132207	0.022015	0.0358111	0.0143953	0.0502746	0.101145	0.166017	0.00773718	0.0748483	0.0324175	0.00154616	0.0489384	0.0498629	0.0600048	0.139498	0.0537203	0.0443999	0.00844736	0.0043658	0.0710995	0.029951
GSM990118	57	0.00952111	0.0696841	0.00967151	0.00767142	0.0135138	0.0131176	0.0464352	0.0568283	3.82237e-05	3.82237e-05	0.0187524	0.0100242	0.102346	0.0135454	0.106262	0.0372719	0.0228128	0.0605417	0.017695	0.01643	0.0416909	0.00418628	3.82237e-05	0.0018989	0.00148206	0.0397771	0.0336986	0.00676303	0.00732682	0.00951668	0.00757175	0.0186216	0.067146	0.0984005	0.00400502	0.0697636	0.0402481	3.82237e-05	0.0238851	0.0517659	0.0661553	0.144192	0.0318027	0.0212974	0.00930804	0.0080999	0.0587992	0.0386933
GSM990119	57	0.00644825	0.205187	0.000259673	0.0014531	0.0144034	0.0223097	0.221973	0.121066	2.51946e-05	0.00172248	0.0666824	0.00702039	0.226693	0.0210382	0.215964	0.0402719	0.0315595	0.316526	0.0382989	0.0204905	0.0392425	0.000438509	2.51946e-05	0.00830279	0.0038958	0.157133	0.0452808	0.012856	0.0100863	0.0204462	0.0208413	0.0380631	0.179969	0.156903	0.00786681	0.0957686	0.0523088	2.51946e-05	0.0236954	0.0423066	0.0686337	0.132658	0.149946	0.0214163	2.51946e-05	0.0464929	0.159359	0.0301147
GSM990276	57	0.0132136	0.142921	0.00599471	0.00481909	0.00892337	0.02137	0.0270491	0.153864	3.15276e-05	0.0003871	0.0157818	3.15276e-05	0.134042	0.0103769	0.124173	0.0429853	0.0276392	0.130474	0.0390052	0.0250977	0.033125	0.00436233	0.158287	0.0139387	0.0147435	0.150511	0.0436713	0.0122179	0.0177186	0.00928927	0.0136711	0.0177218	0.134807	0.261772	0.0191379	0.106801	0.0423647	0.00304926	0.0277119	0.0403928	0.0773399	0.138793	0.0460775	0.0508817	0.00629569	0.0118073	0.0731736	0.0188419
GSM990317	57	0.00444865	0.107246	0.0111949	0.060048	0.00952897	0.022415	0.0793894	0.0816678	0.00936621	0.00407362	0.0356433	0.00572373	0.143597	0.00606095	0.134665	0.0685726	0.0240789	0.0988758	0.0384781	0.0137085	0.0436947	0.000633824	0.0987082	0.00652087	0.00112561	0.0851983	0.0999927	0.00609679	0.0201082	0.00833999	0.00945019	0.015529	0.144445	0.16808	0.00934385	0.0502008	0.0327461	0.00211511	0.0553718	0.0610969	0.0544391	0.138362	0.0281124	0.0196275	0.00231674	0.0104713	0.0543959	0.0228649
GSM990341	57	0.0133423	0.0888378	0.0173936	0.0182128	0.015421	0.0176353	0.125585	0.0817043	0.0115468	0.00487319	0.0131509	3.41935e-05	0.174318	0.013821	0.150396	0.0543833	0.0235458	0.211894	0.0829041	0.0230857	0.0778438	0.0263235	0.00308701	0.0183009	0.00063737	0.121749	0.0474073	0.014032	0.0107415	0.0110485	0.00327878	0.0598522	0.14481	0.213674	0.00895821	0.101435	0.0531221	3.41935e-05	0.0793139	0.0439117	0.0564306	0.205174	0.146986	0.056374	0.00621295	0.0159503	0.0721592	0.00298471
GSM990344	57	0.00420052	0.152695	0.00774577	0.0101337	0.0180673	0.000817687	0.0663769	0.0732307	0.00491306	0.000475937	0.0215483	0.00847126	0.151658	0.0202684	0.11485	0.0536404	0.0361601	0.179063	0.0550306	0.0407188	0.0335209	0.00179084	0.00234668	0.00126363	0.0110978	0.117027	0.0493611	0.0166209	0.0233577	0.0146166	0.0179746	0.0635248	0.122306	0.204834	0.00834743	0.0993357	0.0389384	3.59348e-05	0.0278269	0.0557939	0.0603762	0.139463	0.0699254	0.0183443	0.00706602	0.0105768	0.0602874	0.0224541
GSM990365	57	0.00449248	0.140824	0.000938041	0.0323992	0.00617857	0.0215905	0.0655506	0.127435	0.000153098	0.0210572	0.0467721	0.00544831	0.210787	0.0110525	0.189121	0.149186	0.0241691	0.23608	0.0630635	0.044423	0.0589166	8.91531e-05	3.06887e-05	0.0110121	3.06887e-05	0.145016	0.120787	0.0178634	0.0357976	0.00765272	0.0165575	0.0886303	0.196119	0.177829	0.00455265	0.143518	0.039406	3.06887e-05	0.0611512	0.0501615	0.0561861	0.148001	0.0738433	0.0370822	3.06887e-05	0.00842644	0.0752566	3.06887e-05
GSM990368	57	0.002503	0.143267	3.10837e-05	0.0342978	0.0094331	0.0186987	0.0202786	0.0771205	0.00516344	0.0201579	0.0778084	0.0075227	0.151946	0.0178054	0.148983	0.0545684	0.03721	0.17235	0.0415688	0.0221521	0.0468376	0.00226428	3.10837e-05	0.00120057	0.00484276	0.120351	0.0503279	0.0207297	0.018519	0.0160757	0.0184985	0.0487045	0.109581	0.151871	0.0105741	0.0907754	0.05585	0.00152586	0.0142798	0.03437	0.0647328	0.134723	0.0676028	0.0171444	0.00295605	0.0110801	0.0857171	0.00262462
GSM990430	57	0.0119744	0.0711748	0.004897	0.0426304	0.0135015	0.0140532	0.0163603	0.0456133	0.00318311	0.00614305	0.0227	4.14011e-05	0.092984	0.011353	0.0722503	0.0387932	0.0186294	0.0776484	0.0303626	0.0127905	0.0398741	0.00544748	0.0182318	0.000719585	0.00857383	0.0414151	0.0336406	0.0111323	0.0159589	0.0144612	0.0132639	0.0228238	0.0795643	0.0749707	4.14011e-05	0.0496661	0.00702228	0.000817915	4.14011e-05	0.0330225	0.0863063	0.157717	0.0431135	0.0233421	0.00169214	0.00409417	0.0579311	0.0147729
GSM990461	57	0.00607074	0.0452545	0.000862568	0.00864431	0.00565631	0.029744	0.0768468	0.0853717	0.00434675	0.00652989	0.0196816	0.00970081	0.151717	0.0200819	0.148648	0.0514216	0.0230428	0.113627	0.0348582	0.0145207	0.0440676	0.00749463	0.0188568	0.00236612	0.00487917	0.0531919	0.100527	0.00670476	0.0362955	0.0183452	0.000246677	0.0438154	0.0965034	0.120589	0.00580441	0.0533145	0.0253099	0.00314292	0.0157524	0.0552258	0.0790079	0.136552	0.0221707	0.0254925	0.00801145	0.0170788	0.038668	0.0218361
GSM990487	57	3.03718e-05	0.0577684	0.0149375	0.0033616	3.03718e-05	0.0141401	0.0127902	0.0170141	3.03718e-05	0.00323054	0.0244313	3.03718e-05	0.0435141	0.00997811	0.123086	0.0467148	0.0261233	0.0514317	0.0180842	3.03718e-05	0.0112618	3.03718e-05	0.00853194	3.03718e-05	0.0105742	0.0544723	0.0420927	0.0197503	0.0181702	0.0196266	0.00875159	0.0375453	0.070366	0.0958932	0.00460969	0.0571656	0.0275208	3.03718e-05	0.0308589	0.0366264	0.0439379	0.134161	0.0552326	0.0314154	0.00241652	0.0140698	0.0504911	3.03718e-05
GSM990527	57	0.00634813	0.108159	0.00959831	0.0149253	0.0177696	0.0409973	0.0483491	0.0479441	0.00452289	0.0249168	0.016478	0.0028236	0.100765	0.0247557	0.147888	0.0719104	0.0227538	0.0733299	0.0267286	0.0152891	0.0361827	0.0205452	3.90263e-05	0.00469533	0.00909399	0.0484389	0.0384203	0.0130821	0.0128846	0.0415965	0.00481293	0.0307742	0.0590272	0.104863	0.00132307	0.0399747	0.00494725	0.00620624	0.0192373	0.046206	0.0750641	0.134524	0.0469035	0.0283964	0.0051042	0.00980353	0.0735942	0.027917
GSM989854	56	0.00740711	0.096218	0.0127211	0.00802759	0.0202904	0.0248863	0.0638551	0.0620766	0.00153246	0.0199791	0.0365832	0.00818673	0.122011	0.0204585	0.0986436	0.0320773	0.0412435	0.0567632	0.0518506	0.010168	0.0375556	0.00870267	0.0703291	0.0168907	0.0174056	0.079564	0.0544323	0.0236201	0.0242066	0.0307283	0.013908	0.0318147	0.127539	0.178574	0.0147627	0.0725499	0.0392605	0.00481439	0.0275792	0.0635316	0.0854963	0.151817	0.0518587	0.0331154	0.00705105	0.0150329	0.0720342	0.0315115
GSM989966	56	0.00712806	0.0513086	0.004622	0.0142373	0.00914571	0.0166053	0.00701313	0.0613108	0.0120298	0.0087083	0.0414519	0.00319738	0.0992183	0.0261811	0.10366	0.0328957	0.0223155	0.0606874	0.0327353	0.00888014	0.0309231	0.0150799	0.00493639	0.00391711	0.00737633	0.0351315	0.0195961	0.00626847	0.0112514	0.0237517	0.0250596	0.0222639	0.0703046	0.109204	0.00103448	0.0404274	0.00997089	0.00695483	0.0250488	0.0358926	0.0696801	0.119825	0.0263536	0.0146089	3.30512e-05	0.0124294	0.0678284	0.0184072
GSM989990	56	0.00531999	0.0600123	4.01534e-05	4.01534e-05	0.00773835	0.0244759	0.0252504	0.03977	0.0101356	0.0074297	0.0312244	4.01534e-05	0.0773605	0.0141423	0.0904391	0.010347	0.0298663	0.0472607	0.0204649	0.00229742	0.0359297	0.0108254	0.000455719	0.00753247	0.00710164	0.0326137	0.0321077	0.0119405	0.0104041	0.0298281	0.0180642	0.0170867	0.0548454	0.0413466	4.01534e-05	0.0390633	0.0208337	4.01534e-05	0.0124645	0.0376049	0.0804355	0.138745	0.0217102	0.0138043	0.00569354	0.0062436	0.0523014	0.0348176
GSM990011	56	0.0164042	0.175032	0.00715835	0.0291518	0.0167613	0.0183921	0.112908	0.138586	0.00239469	0.035604	0.0249177	0.00388251	0.211625	0.00935039	0.190068	0.0890926	0.0327349	0.229881	0.0732963	0.0520999	0.0989939	0.00939896	0.0257802	0.0153067	0.00950967	0.170101	0.0837185	0.0108118	0.0483166	0.0221602	0.0134568	0.0618504	0.233966	0.246647	0.0117817	0.139239	0.078238	5.49115e-05	0.0793543	0.0420491	0.0937976	0.165421	0.128953	0.0772139	0.00305465	0.0274364	0.108452	0.0131197
GSM990377	56	0.00594337	0.0900857	0.00868212	0.00402614	0.0165724	0.0259783	0.0260931	0.068013	0.00153086	3.21326e-05	0.0254757	0.00660604	0.182813	0.0137911	0.0648439	0.0259888	0.0271515	0.143041	0.0237238	0.0143547	0.0251957	3.21326e-05	0.00586362	0.00454266	0.00674979	0.098333	0.0736662	0.0116433	0.0149997	0.0166062	0.00841446	0.0192289	0.146129	0.137018	0.0125816	0.0841639	0.0151556	3.21326e-05	0.0191082	0.0406323	0.055635	0.13895	0.0480221	0.0384775	0.00289261	3.21326e-05	0.0725868	3.21326e-05
GSM990380	56	0.00239943	0.11317	0.0127615	0.0540916	0.00865681	0.016692	0.161808	0.185993	3.54884e-05	0.0052857	0.0417367	0.000888103	0.203882	0.021467	0.0485807	0.0867869	0.0263159	0.114681	0.0276737	0.0219255	0.041055	0.000662646	0.020322	0.00757732	3.54884e-05	0.119466	0.0618791	0.0132287	0.0201343	0.0108246	0.0065365	0.0650662	0.150084	0.186098	0.00719976	0.0733273	0.0526819	0.00105187	0.0687109	0.045439	0.0655785	0.202131	0.0374437	0.0601014	0.00455429	3.54884e-05	0.0699559	0.0248112
GSM990438	56	0.0108332	0.0614012	0.0130603	0.00821025	0.0126516	0.0200479	0.014909	0.0554957	3.36007e-05	3.36007e-05	0.0143927	3.36007e-05	0.147899	0.0180284	0.179462	0.0429798	0.033168	0.0572833	0.0340341	0.0178039	0.0394446	0.0105755	3.36007e-05	0.00180035	0.00554733	0.0668092	0.033663	0.00828103	0.0308828	0.0109819	0.0115686	0.0282351	0.110777	0.171325	0.00716486	0.0571496	0.0201165	3.36007e-05	0.00188853	0.036938	0.0896453	0.138785	0.0677972	0.0136239	0.00597923	0.00545117	0.0504318	0.0104537
GSM990455	56	0.00728507	0.0279866	3.28289e-05	0.00705307	0.00839984	0.0342179	0.00373517	0.0125137	0.00247037	3.28289e-05	0.00232373	3.28289e-05	0.0612941	0.0310413	0.0666088	0.018979	0.0263976	0.0496772	0.0222604	0.00906001	0.0148535	0.00801676	0.00557658	0.00141972	0.00668898	0.0328464	0.0209491	0.0114355	0.0113627	0.0132548	0.0325643	0.00839433	0.0547072	0.0445967	3.28289e-05	0.0317822	0.0073747	0.00307857	0.0135076	0.0608795	0.0873029	0.166248	0.0227456	0.0226745	0.00042783	0.00761606	0.0549666	0.018627
GSM990464	56	0.0100495	0.0656365	0.00121665	0.0128637	0.00666752	0.0137577	0.0200398	0.0627618	0.0179285	0.00145889	0.0100445	0.00642361	0.0994266	0.0150941	0.1068	0.0231411	0.0222639	0.0554379	0.0257087	0.0127813	0.0389654	0.0101148	0.0200043	0.00308859	0.00884616	0.0446394	0.0187457	0.0166869	0.013242	0.0179722	0.0162833	0.0117494	0.076673	0.0821913	0.00865608	0.0673122	0.00653331	0.00352658	0.0100046	0.0428942	0.0857992	0.130863	0.0195898	0.0135292	0.00223147	0.0197458	0.0547644	0.010562
GSM990506	56	0.0127652	0.0741701	0.00366643	0.00939052	0.0175445	0.0228511	0.00494203	0.0312723	0.00181587	0.00638954	0.00742244	2.35578e-05	0.113275	0.0198172	0.0624099	0.0223529	0.0115618	0.0576572	0.0249586	0.0210267	0.0368449	0.00454359	2.35578e-05	0.0011454	0.0137968	0.0470735	0.0228598	0.00944285	0.00956399	0.0119333	0.00799983	0.0219553	0.0818737	0.134583	2.35578e-05	0.0391502	0.00980272	2.35578e-05	0.00191773	0.0196578	0.0681865	0.133078	0.0268667	0.0307913	0.00185025	0.00476358	0.0487535	0.00888037
GSM990509	56	0.00592839	0.0288984	0.00933912	0.00171901	0.011065	0.0131696	0.00957644	0.0763267	0.00422039	0.0153454	0.0152528	0.0059302	0.157695	0.0177494	0.288096	0.0280721	0.0181615	0.0756141	0.00734253	0.0164535	0.0111029	5.58028e-05	0.0524993	5.58028e-05	0.00375816	0.112744	0.0236672	0.010208	0.00567832	0.0139705	0.00972042	0.013921	0.0949332	0.0735671	0.00915796	0.0275687	0.00387637	0.00196102	0.00502142	0.00829225	0.0553919	0.127004	0.137354	0.00285988	0.000742259	0.00437834	0.0250787	0.0238225
GSM990511	56	0.00646121	0.143571	0.0001601	0.00845693	0.00902433	0.0235258	0.062414	0.0934921	3.92815e-05	0.0183243	0.0357945	0.00809048	0.183241	0.0191363	0.181454	0.0497039	0.0238749	0.175498	0.0273991	0.0171181	0.0358667	0.00257825	0.00241726	0.00396667	0.00456499	0.110094	0.056791	0.0148378	0.030869	0.00871087	0.00948768	0.034869	0.216834	0.207877	0.0312352	0.125659	0.0532293	0.0024359	0.0392558	0.0461433	0.066992	0.135727	0.0624593	0.0364451	0.00185985	0.0111819	0.0670084	0.00813641
GSM990587	56	0.0072853	0.0752385	0.00797137	0.00540399	0.0170314	0.0365649	0.0220228	0.117827	0.00541346	0.0058563	0.0200768	0.001383	0.137376	0.0264838	0.113673	0.0333252	0.0310335	0.194983	0.049757	0.0160405	0.0714639	0.0221227	0.00774167	0.00951359	0.00551357	0.0844191	0.061077	0.0154871	0.0208475	0.0196446	0.0161238	0.0158304	0.147778	0.20424	0.0089017	0.0751446	0.0287429	0.00041412	0.0355278	0.0535461	0.0966746	0.145857	0.0593002	0.0370796	0.00855486	0.0157161	0.069943	0.0766069
GSM989896	55	0.00675077	0.172	0.00431696	0.0125602	0.025711	0.0122134	0.114187	0.10453	0.0114867	0.0112561	0.0527504	0.0164339	0.138844	0.00492439	0.132403	0.0749339	0.0319366	0.210769	0.0575091	0.028669	0.077274	0.0171885	0.0786994	0.0145049	0.00887196	0.257965	0.0345625	0.0100216	0.0234712	0.00924686	0.0242989	0.0558572	0.18667	0.205014	0.0413791	0.136953	0.0406449	4.99496e-05	0.0625803	0.0397738	0.0448779	0.183165	0.0707732	0.0459157	0.00330466	0.0102845	0.114072	0.0430224
GSM989977	55	0.00479564	0.12709	0.00767639	0.00437461	0.0190361	0.0292415	0.0133727	0.0775275	0.00961946	0.0215858	0.0441061	0.0106242	0.173183	0.0254104	0.123098	0.0443483	0.0240836	0.0933785	0.0789299	0.0212697	0.0601687	0.0119314	0.0187441	0.00604424	0.00971403	0.0765512	0.0339389	0.0178804	0.0221812	0.0287592	0.0186125	0.0216345	0.153429	0.202559	0.0218243	0.0678125	0.0265474	0.00789417	0.0351125	0.0505627	0.0882792	0.162637	0.0581775	0.0416956	0.00949094	0.0180288	0.101864	0.0250468
GSM990086	55	0.00674975	0.087151	0.00418566	0.00728731	0.0255362	0.026542	0.0644268	0.0802261	0.00525429	0.0192426	0.0307349	0.0110158	0.143108	0.029565	0.149181	0.0560908	0.0268759	0.0837144	0.0463326	0.0358933	0.0579806	0.0118336	0.00100727	0.0117278	0.00738614	0.0758767	0.0332569	0.0238051	0.0242013	0.0465197	0.0168812	0.037971	0.130257	0.0930973	0.00609509	0.0703528	0.0137689	0.0092536	0.0353072	0.0297307	0.0705788	0.160988	0.0432921	0.00950317	0.011363	0.0181875	0.0494042	0.016418
GSM990112	55	0.00325951	0.0765677	0.00575224	0.00592185	0.00989823	0.00965324	0.026923	0.0535386	0.00315912	0.00215123	0.0225501	0.0161885	0.104383	0.0100815	0.119435	0.0541545	0.028758	0.139589	0.0279112	0.0205679	0.0378081	3.55405e-05	0.0525923	0.0166455	0.0052949	0.0922375	0.0338364	0.0113902	0.0149993	0.0163969	0.0193636	0.0610128	0.138294	0.145738	0.00604193	0.0685549	0.0264331	3.55405e-05	0.0198717	0.0357282	0.0641443	0.13029	0.05553	0.0343186	3.55405e-05	3.55405e-05	0.0867888	0.00246328
GSM990274	55	0.00749748	0.0936596	0.0143105	0.0119482	0.0166877	0.0109122	0.0136972	0.161782	0.00635727	0.00575811	0.0366057	0.00660272	0.250607	0.0147926	0.152292	0.0357344	0.032614	0.127914	0.0159258	0.0224483	0.0380402	0.00619337	4.27399e-05	0.00615236	0.00695672	0.0921749	0.0303353	0.0147583	0.0276038	0.0109098	0.0136054	0.0229984	0.188369	0.159335	0.0203989	0.0812862	0.0511827	0.000440494	0.0333561	0.0332755	0.0734082	0.113123	0.0197626	0.0543633	0.00656757	0.00882368	0.0695938	0.0161161
GSM990281	55	0.00549068	0.0957979	4.36648e-06	0.0239394	0.0129872	0.0262834	0.0125813	0.0913004	0.00200492	0.00360232	0.0223098	4.36648e-06	0.130888	0.0125053	0.0349258	0.0979343	0.0274469	0.154941	0.0327996	0.0109009	0.0399363	0.00520273	0.00202033	0.0132971	0.00737579	0.0866233	0.0388653	0.014495	0.0155878	0.0105626	0.00279716	0.0454194	0.141611	0.192203	0.0107064	0.109337	0.026067	4.36648e-06	0.02184	0.0481665	0.0643847	0.128854	0.0316742	0.0187847	0.00465376	0.011059	0.0544082	0.00510848
GSM990294	55	0.00932858	0.156905	0.00513313	0.00635735	0.00823327	0.0130312	0.0386819	0.0981427	0.0113384	0.00400334	0.0523425	0.00118494	0.16136	0.0209193	0.0794141	0.0104777	0.0371889	0.0943179	0.0441881	0.0146223	0.0804064	0.00423246	0.0279842	0.00423548	0.014136	0.0677886	0.0316022	0.0243963	0.0201424	0.00869318	0.00696721	0.0528172	0.155034	0.14065	0.0114521	0.110897	0.0657577	3.18366e-05	0.0290755	0.0379003	0.05961	0.178053	0.0180471	0.0307373	0.00632645	0.0203665	0.0852207	0.0208498
GSM990319	55	0.0108561	0.176977	0.0120343	0.0255827	0.00598592	0.00695769	0.0765572	0.115855	3.82897e-05	0.0253832	0.105741	0.0130058	0.107977	0.0199478	0.140553	0.081769	0.0324702	0.156863	0.0536738	0.0309955	0.0547637	0.00742639	0.0045278	0.0157449	0.00489351	0.144954	0.056672	0.00878338	0.0336013	0.00707975	0.00369885	0.112145	0.209527	0.196413	0.0332253	0.128496	0.0779553	0.0103494	0.0842068	0.0471214	0.0593436	0.173714	0.0773887	0.0469641	0.006658	0.0153156	0.0582709	0.0108497
GSM990325	55	0.00890834	0.163706	0.0165084	5.01827e-05	0.0154964	0.0104711	0.124779	0.0661246	0.00614404	0.0143891	0.0169767	0.00424477	0.0880602	0.0263489	0.063436	0.0775476	0.0338931	0.135852	0.0464319	0.024001	0.0591084	0.0100255	0.00620523	0.00869862	0.00459136	0.0850668	0.056554	0.0200319	0.0145113	0.0134359	0.00667713	0.0333114	0.156483	0.144899	0.0158318	0.0796175	0.0325948	5.01827e-05	0.079243	0.0370748	0.0648871	0.141827	0.0883676	0.0455802	0.0066515	0.00185298	0.0531002	0.0483139
GSM990361	55	0.0114612	0.161142	0.0173954	0.0151644	0.0136739	0.0149553	0.0824094	0.126786	0.0116308	0.0227712	0.0423259	0.0048739	0.186851	0.0147486	0.162439	0.0952544	0.0367852	0.170884	0.0623657	0.0720951	0.0586288	0.00676173	3.89477e-05	0.0102309	0.0102147	0.167539	0.0552717	0.00998683	0.0243838	0.0177173	0.0185562	0.0424569	0.199336	0.274086	0.0338312	0.173062	0.0528633	0.0040493	0.103804	0.0476652	0.0747561	0.201103	0.086168	0.0757318	0.0134536	0.0150237	0.0932647	0.0131089
GSM990381	55	0.00397097	0.130503	0.0112087	0.00837764	0.0103979	0.0141628	0.0135117	0.0703087	3.48848e-05	3.48848e-05	0.0132432	0.00141575	0.137836	0.0156848	0.0853894	0.0461101	0.0418946	0.0934737	0.0291538	0.0285771	0.0137749	0.00878349	0.111781	0.00496343	0.0152485	0.0592226	0.0390488	0.0120151	0.0143086	0.00339539	0.0102681	0.0202491	0.130887	0.201263	3.48848e-05	0.0576755	0.020731	6.72595e-05	0.0233369	0.0398573	0.0774496	0.142118	0.025219	0.0154484	0.0010606	0.00379005	0.071503	0.0190613
GSM990392	55	0.00161308	0.0813738	0.00683707	0.00428873	0.0162803	0.0192506	0.0215739	0.0920476	0.00300887	0.018644	0.0219835	0.00637179	0.136189	0.0181559	0.110124	0.0366611	0.0349203	0.089942	0.0235563	0.0286642	0.0521905	0.00516448	0.00312901	0.0130871	0.0082293	0.052781	0.0562509	0.0191508	0.0417068	0.0168398	0.0129088	0.044697	0.131502	0.194701	0.017605	0.0786738	0.0278082	0.00244008	0.0310054	0.0594484	0.0753284	0.136648	0.0580557	0.0313051	0.00668828	0.0113756	0.0769237	0.0247783
GSM990516	55	0.00596208	0.254344	0.00476399	0.0341583	0.0163813	0.018283	0.0775904	0.113272	0.00130936	0.00112321	0.0337069	0.00386224	0.21101	0.0161521	0.13984	0.154739	0.0411667	0.200476	0.0475072	0.0386282	0.0623992	3.89588e-05	0.0441749	3.89588e-05	0.00460666	0.144532	0.056505	0.00596792	0.0318226	0.0117196	0.0198901	0.029651	0.255849	0.254074	0.024025	0.159217	0.033676	3.89588e-05	0.0496654	0.0382571	0.0725354	0.16435	0.0933071	0.0757687	0.00197116	3.89588e-05	0.090488	0.00577768
GSM990549	55	0.0058616	0.0884789	0.000752908	0.00824978	0.0170509	0.0330612	0.019939	0.0522326	3.245e-05	0.0149881	0.0279831	3.245e-05	0.104214	0.0190745	0.102355	0.0287751	0.0289078	0.0581713	0.0295214	0.00272791	0.0202375	0.00862941	0.0527079	0.0140449	0.014746	0.0518377	0.0330042	0.0035552	0.0211678	0.038325	0.0112679	0.0160244	0.0960498	0.0303242	0.00284463	0.0616634	0.00496043	0.000130002	0.0285389	0.032514	0.0857952	0.123237	0.0462021	0.0231104	0.00100804	0.0121193	0.0564899	0.019469
GSM989840	54	0.0135847	0.092761	0.00720493	0.00700919	0.0279962	0.0326353	0.0217602	0.091912	0.00500525	0.00753349	0.0336914	0.00475741	0.153421	0.0141908	0.118924	0.104761	0.0350689	0.0565106	0.05431	0.0123525	0.0640898	0.0116495	0.00732182	0.0203149	0.00452852	0.112223	0.0376643	0.017201	0.0371434	0.0227259	0.0182386	0.0295444	0.131361	0.176203	0.0309084	0.0921189	0.0469204	0.00522648	0.0532441	0.0475319	0.0870767	0.167742	0.0543401	0.0344021	0.00921704	0.0169326	0.0745263	0.0437037
GSM989862	54	0.00626638	0.0800171	0.00258141	0.00727416	0.0266075	0.0172573	0.0276294	0.0451247	0.00781656	4.30848e-05	0.014838	0.00277412	0.0903805	0.0141368	0.0999002	0.0303151	0.0365091	0.0708706	0.0500632	0.00749192	0.0425245	0.023311	0.00667412	0.0112335	4.30848e-05	0.0379443	0.0387773	0.0166865	0.0169324	0.0140957	0.00838442	0.0191223	0.0859899	0.112908	0.0131993	0.0495956	0.0102529	0.0055345	0.0129659	0.0662613	0.0831314	0.171131	0.0510608	0.0210736	0.00508948	0.0105038	0.0595335	0.0664671
GSM989880	54	0.00611262	0.0932216	0.0170136	0.0046693	0.0198826	0.018572	0.0150711	0.0895091	0.00897349	0.0112837	0.0175208	0.00233909	0.113162	0.0133802	0.127467	0.0437506	0.0331765	0.0405828	0.0522855	0.0221829	0.0387784	0.0216599	0.00698907	0.0179291	0.0163376	0.0798316	0.043428	0.00940063	0.0160463	0.010186	0.0231998	0.0191296	0.0947184	0.162599	0.0188714	0.0587259	0.0140116	0.0020003	0.0323301	0.0399535	0.0908083	0.143556	0.059238	0.0232525	0.00254552	0.0137452	0.0892679	0.0447459
GSM989886	54	0.00920897	0.0974083	0.0116985	0.00358414	0.0285542	0.0165051	0.0212058	0.0561499	0.00784693	0.0160928	0.0201063	0.00673265	0.0807888	0.00806061	0.145892	0.0620578	0.0233074	0.0592773	0.0396575	0.0181437	0.0460449	0.0226431	0.00668949	0.0121161	0.00752877	0.07432	0.031787	0.0174972	0.01467	0.0263624	0.0133637	0.0261275	0.106181	0.179615	0.0150305	0.07367	0.0190809	0.00389493	0.0411557	0.0427523	0.0613164	0.154935	0.028813	0.0290997	0.0046227	0.0152102	0.0675056	0.0510688
GSM989945	54	0.00553147	0.107669	0.0146597	0.0144159	0.0265165	0.0297432	0.03361	0.0773009	0.00834411	0.0147698	0.0306151	0.0508904	0.130201	0.0182674	0.187765	0.075387	0.0400134	0.106351	0.0493178	0.0167051	0.0575662	0.0125352	0.033746	0.0114065	0.00987412	0.0948708	0.0556115	0.0185303	0.022041	0.0187562	0.0158038	0.0263317	0.138434	0.204334	0.00677695	0.0595329	0.0286704	0.00109341	0.0409689	0.0498104	0.0825127	0.172904	0.055419	0.0393056	0.00815684	0.0206217	0.0816895	0.0338492
GSM989958	54	0.00721921	0.0380152	0.00451457	0.00450571	0.0211074	0.0168853	0.0104549	0.0253828	0.0169096	0.0131967	0.0134477	3.66615e-05	0.0790828	0.0151026	0.0801463	0.0550945	0.0252309	0.0288289	0.0354936	0.00401045	0.0322735	0.0151688	0.0269073	0.00503917	0.00627811	0.0515557	0.0294537	0.016164	0.0131507	0.0213734	0.0265049	0.0110092	0.0591706	0.0958516	0.0102154	0.0381895	0.0132261	0.00456449	0.021339	0.0591029	0.0870587	0.125508	0.0167941	0.00276287	0.00778661	0.0133239	0.0490625	0.0364518
GSM989978	54	0.00621976	0.104182	0.0194346	0.00869587	0.0131648	0.0220267	0.0939648	0.108119	0.00288099	0.0191176	0.0362799	0.0109284	0.138387	0.0143407	0.1037	0.0292932	0.0277905	0.104295	0.0576766	0.0180923	0.0535174	0.0138987	0.0365467	0.0137801	0.00596605	0.131461	0.0408421	0.0092413	0.0251291	0.0236486	0.0164297	0.0236164	0.175307	0.182975	0.0105991	0.0813041	0.0224268	4.16967e-05	0.0701997	0.0513087	0.0782123	0.169459	0.0549062	0.0487049	0.00180241	0.0147149	0.108863	0.0323384
GSM989985	54	0.00652379	0.15828	0.00374986	0.01537	0.0112269	0.0212764	0.0456854	0.0659113	0.0136882	0.0135785	0.0744546	0.0076155	0.165604	0.0150952	0.194057	0.0716934	0.0396063	0.11804	0.0566852	0.0229517	0.0601344	0.00773899	0.00123159	0.00723619	3.21259e-05	0.113847	0.0621649	0.024004	0.0244221	0.0471067	0.00505044	0.053021	0.209498	0.173208	0.0165716	0.110961	0.0465649	0.0024977	0.0356838	0.0432922	0.0687424	0.157716	0.113638	0.0406682	0.00127387	0.00773224	0.0983579	0.0374176
GSM989988	54	0.00849854	0.145803	0.00923089	0.0170772	0.0154411	0.0235059	0.101875	0.149933	0.00598105	0.0182511	0.0345468	0.0173641	0.166103	0.0174397	0.12498	0.0466898	0.0349955	0.243772	0.0318295	0.0260338	0.057564	0.00643245	0.0177719	0.00735698	0.0102798	0.122331	0.0472027	0.0106445	0.0286499	0.0205037	0.0170257	0.0309707	0.182265	0.275412	0.00935042	0.103832	0.0308138	0.00310223	0.0419785	0.0420795	0.0768978	0.154034	0.100864	0.041141	0.00657358	0.013105	0.0756326	0.027011
GSM990074	54	0.0128175	0.107291	0.0148975	0.0214029	0.0134101	0.0264652	0.0322294	0.0834852	0.0238933	0.0150718	0.0483154	0.00973968	0.0996256	0.0241622	0.146541	0.0441282	0.0315165	0.167614	0.0510017	0.012714	0.0452671	0.00812398	0.00785396	0.00976553	0.0145344	0.0698356	0.0531561	0.0180375	0.0128593	0.0598106	0.0261169	0.0482959	0.102854	0.100406	2.98651e-05	0.102148	0.0617015	0.00629202	0.0345608	0.0512893	0.0625647	0.131584	0.0460146	0.022201	0.00331973	0.0221664	0.0450388	0.0331184
GSM990103	54	0.00702467	0.0633963	0.0148812	3.74046e-05	0.00469122	0.0198679	0.0166973	0.0414939	3.74046e-05	0.00634698	0.0279075	3.74046e-05	0.107299	3.74046e-05	0.0511527	0.0233285	0.0316048	0.0734226	0.0130107	0.0219301	0.0492074	0.0144053	3.74046e-05	0.00520819	0.00146253	0.0833849	0.0364768	0.0201376	0.00789461	0.00718004	0.0221953	0.0383905	0.100353	0.0933245	3.74046e-05	0.0722175	0.0246115	0.00286358	0.0355793	0.046098	0.0697803	0.130204	0.0258446	0.022318	0.00870613	0.00707358	0.0639771	0.0218239
GSM990303	54	0.00722183	0.134658	0.0162261	0.0351017	0.00782103	0.0262824	0.037995	0.0655341	0.00609555	0.0219434	0.0166218	0.00736921	0.166163	0.0228142	0.130864	0.0603926	0.0228837	0.132908	0.0551375	0.011608	0.0460641	0.0104757	0.0132553	0.00370118	0.00552981	0.0474134	0.0511666	0.0099561	0.0309938	0.0109724	0.0158182	0.055354	0.193719	0.0453506	0.0178531	0.0759051	0.049004	0.00463183	0.0157173	0.0368659	0.0505373	0.166562	0.0454213	0.0447164	0.00426109	0.011184	0.0657925	0.0190712
GSM990340	54	0.00373505	0.0565347	0.0121084	0.0037507	0.00979332	0.0288664	0.0165691	0.0881375	0.00806894	0.00917751	0.0207461	0.0144919	0.16164	0.0149674	0.0813647	0.0620527	0.027758	0.114753	0.0668062	0.0210296	0.035301	0.00848686	0.0773014	0.00469983	0.00990472	0.0753304	0.0364833	0.0135522	0.00964562	0.0254981	0.000636553	0.0472028	0.11803	0.0303576	0.00725032	0.0729763	0.0180183	3.30178e-05	0.0338853	0.0585982	0.0537522	0.122378	0.0164615	0.0259693	3.30178e-05	0.0244226	0.0376569	0.0176485
GSM990357	54	0.0053645	0.2042	0.0137014	0.0883745	0.0134503	0.0342722	0.0484159	0.142015	2.90433e-05	0.0177496	0.0191921	2.90433e-05	0.207437	0.0097231	0.21724	0.127431	0.0398795	0.21348	0.0398977	0.0136667	0.0546203	9.33256e-05	0.000306602	2.90433e-05	0.00232393	0.134921	0.0323954	0.0176661	0.0365464	0.0147015	0.0127528	0.065548	0.211983	0.301338	0.00487145	0.109755	0.0817254	0.0036812	0.0334049	0.0448251	0.0750298	0.166158	0.102394	0.0605429	2.90433e-05	2.90433e-05	0.0826262	0.0151499
GSM990396	54	0.00533872	0.0947659	0.00768855	0.0039125	0.00785581	0.0218812	0.0157251	0.0652153	0.0107351	0.00694572	0.0191289	2.65472e-05	0.136001	0.0206698	0.103795	0.046962	0.0341875	0.0994879	0.0334398	0.0158054	0.0383426	2.65472e-05	2.65472e-05	0.00102819	0.00274859	0.0852346	0.0354983	0.0142037	0.0364709	0.0043761	0.0170412	0.0422254	0.117013	0.115903	0.0259687	0.044556	0.0278187	2.65472e-05	0.00665435	0.0595671	0.075198	0.158144	0.0428926	0.0135911	0.00186779	0.00497144	0.0422814	0.00601545
GSM990592	54	0.00634533	0.0816939	0.00826421	0.0189532	0.0125096	0.0272044	0.0201113	0.0700854	8.34457e-06	0.0107981	0.0292007	0.00421165	0.109219	0.0237833	0.0835831	0.0396333	0.0365141	0.060814	0.0377266	0.0137714	0.031706	0.0116346	0.00059688	0.0101101	8.34457e-06	0.0578017	0.0203414	0.00901084	0.0252638	0.0190891	0.0227066	0.01957	0.0956939	0.15187	0.00449937	0.0696863	0.0179295	0.00827965	0.0276135	0.0451396	0.0873226	0.138435	0.0293668	0.0325474	0.00241163	0.0161618	0.0665274	0.00610056
GSM989876	53	0.00913872	0.210666	0.01932	0.020596	0.0245359	0.0240641	0.140636	0.143291	0.00560552	0.0340988	0.0476147	0.000921013	0.210669	0.0157665	0.193188	0.0851061	0.0319086	0.234493	0.104008	0.0572978	0.0788818	0.0115049	0.0615677	0.0372164	0.0152929	0.24645	0.0904675	0.0124115	0.0329068	0.0163069	0.0126204	0.0999872	0.277786	0.265235	0.0364392	0.169148	0.0827342	3.671e-05	0.0841328	0.0638585	0.0730393	0.208636	0.193045	0.101103	0.00311182	0.0194206	0.156911	0.0455163
GSM989937	53	0.00245033	0.152205	0.0136597	0.0034582	0.0203912	0.0121263	0.0653992	0.18431	0.00475825	0.0741046	0.0162907	0.00612669	0.282351	0.0123655	0.0942426	0.155736	0.0344679	0.258285	0.0551922	0.00901749	0.0566572	0.00828798	0.00847979	0.00328338	0.0100787	0.145183	0.0420308	0.0197134	0.0310503	0.0157587	2.40809e-05	0.0430512	0.176827	0.200061	0.0154403	0.12441	0.0323666	0.00232715	0.0828806	0.0358108	0.0443583	0.16978	0.0874131	0.104571	2.40809e-05	0.00282389	0.0762722	0.0191663
GSM990080	53	0.00902571	0.115592	0.0297632	0.0358332	0.00806192	0.0180157	0.00381211	0.0869783	0.0109114	0.00141598	0.0886806	0.00699321	0.187729	0.0196259	0.0894883	0.0962435	0.0300427	0.133457	0.0346979	0.0147857	0.0346533	0.00565955	0.00377223	0.010013	0.0100198	0.10893	0.0228678	0.0156937	0.0503348	0.0473147	0.0245638	0.0356504	0.125921	0.123031	0.0326806	0.0942449	0.00730886	0.000350463	0.0234256	0.0595038	0.0728009	0.13262	0.0680642	0.035014	0.0030212	0.0236049	0.0705749	0.0107703
GSM990093	53	0.0120861	0.0509798	0.00247105	0.0664136	0.0151629	0.0195785	0.0251644	0.0343763	0.0163997	0.00285607	0.0136457	0.00672761	0.171568	0.0229806	0.0965885	0.051411	0.0562854	0.0121397	0.0253734	0.0106316	0.0455129	0.0214963	0.0183982	0.00880759	0.0188841	0.0584781	0.030264	0.020931	0.0209981	0.0290828	0.00801772	0.0270353	0.0801937	0.0772354	0.00322462	0.0644891	0.0122051	6.1426e-05	0.0207927	0.0621664	0.0739346	0.148276	0.0169895	0.0205331	0.00236263	0.0177278	0.0621967	0.0193107
GSM990109	53	0.0109365	0.0950406	0.0222302	0.00728088	0.0128036	0.016168	0.0792782	0.122335	0.00194312	3.71735e-05	0.0340179	0.0177485	0.143823	0.0120679	0.141799	0.0910921	0.0284156	0.133351	0.0399848	0.0548319	0.0528182	3.71735e-05	0.00261342	0.0129567	0.00386221	0.0751658	0.0530692	0.0105712	0.0216421	0.00913245	0.015979	0.0434601	0.150762	0.129807	3.71735e-05	0.075806	0.0370172	0.00320083	0.0232416	0.0374511	0.0663477	0.130352	0.0975963	0.0319453	0.00137741	0.00981304	0.0521908	0.0286587
GSM990326	53	0.00678661	0.119608	0.0170658	0.0154756	0.00261215	0.0327791	0.117582	0.110379	0.000860779	0.00948006	0.0179573	0.00271751	0.16323	0.0139575	0.129232	0.0213935	0.0269789	0.17996	0.0426704	0.018367	0.030464	0.0037817	0.0832534	0.0631747	0.00154655	0.134034	0.0502761	0.0171282	0.0170151	0.0215835	0.00907456	0.0585105	0.131553	0.274315	4.33283e-05	0.0746269	0.0255808	4.33283e-05	0.0176601	0.0825445	0.0668614	0.145583	0.0603322	0.03121	0.0107013	0.00664486	0.0431747	0.0250749
GSM990384	53	0.00567481	0.127057	3.10002e-05	3.10002e-05	0.00695253	0.0123006	0.0331374	0.121028	3.10002e-05	0.0109702	0.0319991	0.00849655	0.139207	0.0214308	0.146405	0.0493272	0.0266098	0.105801	0.0529583	0.0290382	0.0426196	3.10002e-05	0.00527919	3.10002e-05	3.10002e-05	0.132258	0.0496387	0.0173441	0.0193669	0.00855355	0.00304849	0.0415489	0.162125	0.203032	0.000734309	0.0770896	0.0306148	3.10002e-05	0.0144119	0.0359909	0.0506804	0.16572	0.0890853	0.0309097	3.10002e-05	0.0213714	0.07716	0.0105396
GSM990413	53	0.00414356	0.120118	0.00776308	0.0591013	0.00858843	0.0201288	0.0191755	0.0994692	0.000744277	0.0095696	0.0134212	0.00787792	0.151609	0.0291877	0.0832424	0.116212	0.023852	0.0951694	0.0422874	0.00995437	0.0488756	4.3263e-05	4.3263e-05	0.00294052	0.0117567	0.063639	0.0482989	0.0098427	0.0214396	0.0174187	0.00630017	0.0185192	0.113497	0.192213	4.3263e-05	0.0601131	0.0126674	4.3263e-05	0.0208125	0.0274523	0.0719761	0.144458	0.0452317	0.0397339	4.3263e-05	4.3263e-05	0.0597339	0.0212443
GSM990446	53	0.0152148	0.0637497	0.0017131	0.0019876	0.00735997	0.00820771	0.0115722	0.0418571	2.60179e-05	2.60179e-05	0.0169856	2.60179e-05	0.0984007	0.0245847	0.0907142	0.01912	0.0152708	0.0342086	0.0174927	0.000857767	0.030056	0.00885548	0.0217643	0.000804288	2.60179e-05	0.0200098	0.0293652	0.00574601	0.0119635	0.0102842	0.0149712	0.0123478	0.055853	0.0228789	2.60179e-05	0.0241966	0.0168475	0.0078813	0.009515	0.0301595	0.0673527	0.128101	0.0146163	0.00781764	0.0120449	0.0091633	0.0498338	0.0078511
GSM989935	52	0.0119531	0.0825535	0.000240708	3.97418e-05	0.0171918	0.0220906	0.0076993	0.0466934	3.97418e-05	0.0100702	0.0240042	0.00352592	0.126855	0.0221558	0.0968836	0.0382615	0.041003	0.039462	0.0376787	0.00440785	0.0416098	0.0082529	0.00477077	0.00716897	0.00679231	0.0495359	0.0329691	0.0136044	0.0162668	0.0182956	0.017071	0.00575124	0.07233	0.0478979	0.00869103	0.0466134	0.0254166	0.00231834	3.97418e-05	0.0384851	0.0720937	0.14192	0.02735	0.0264023	0.00483173	0.0207578	0.0575951	0.0326165
GSM989982	52	0.0057915	0.0876828	0.00635098	0.00535947	0.0190524	0.0257864	0.0194382	0.0492864	0.00808375	0.00766697	0.0120362	0.0043451	0.0824238	0.0199541	0.120176	0.0348437	0.027266	0.0392093	0.0322472	0.00999188	0.0399554	0.0110884	3.75184e-05	0.00687779	0.00781584	0.0401699	0.0385595	0.0158237	0.0199881	0.0154995	0.00789157	0.0228027	0.0836665	0.152688	0.0099985	0.0403326	0.0107019	3.75184e-05	0.0250954	0.043329	0.0737232	0.141863	0.0193122	0.016969	0.000592716	0.0119487	0.0762315	0.0272892
GSM990083	52	0.0128903	0.053996	0.0111613	3.73155e-05	0.0144506	0.0315547	0.00859628	0.041801	0.0119003	0.0199796	0.0257013	0.0100348	0.0868766	0.0213138	0.156783	0.0652136	0.0273122	0.0685099	0.036878	0.0162836	0.0645486	0.0106441	0.000714359	0.0369538	0.0142816	0.0541838	0.037529	0.0143245	0.0152408	0.0255835	0.0313563	0.0196113	0.113227	0.0262419	0.0244008	0.0479784	0.0166242	0.00188393	0.0278025	0.0503773	0.08743	0.129048	0.0273676	0.0273118	0.00539869	0.0134345	0.0521389	0.0360587
GSM990268	52	0.00799993	0.0922919	0.00430484	0.00883182	0.0154184	0.0240827	0.0388765	0.0949094	0.0071949	0.0141985	0.0209881	0.00592838	0.124306	0.0255753	0.14993	0.0877952	0.0268133	0.105107	0.0212323	0.0137844	0.0298951	0.0093681	0.00124909	0.00372488	0.00298726	0.0901922	0.0258957	0.0150067	0.0154992	0.0141224	0.023152	0.0440532	0.11053	0.176264	0.00558114	0.0586624	0.0235812	0.00747151	0.0429279	0.0596114	0.0797499	0.152832	0.0209132	0.0357644	3.42412e-05	0.0134302	0.0529063	0.0112141
GSM990314	52	0.00622482	0.131673	0.016615	0.0190604	0.0141633	0.0244197	0.053183	0.0974718	0.00464269	0.00449098	0.0242668	0.00084441	0.140918	0.0120866	0.133	0.0469367	0.00971276	0.153067	0.0482578	0.0158006	0.0373093	0.00409929	0.00104911	0.00543311	0.00635849	0.127437	0.046509	0.0175132	0.0264246	0.0115837	0.00989852	0.0576937	0.140913	0.161403	0.0146349	0.0993494	0.0649741	0.0013289	0.0445331	0.0590735	0.0745381	0.162048	0.0793777	0.0505847	0.00730755	0.0145466	0.0863565	0.0308267
GSM990318	52	0.0274778	0.188632	0.0216687	0.0304132	0.0081394	0.0210113	0.0616917	0.108563	0.00216905	0.0479565	0.0336609	3.01446e-05	0.189305	0.0146846	0.104706	0.10762	0.0237533	0.114672	0.070215	0.0350992	0.05244	0.0120015	0.00922392	0.0226421	0.0104571	0.158075	0.0652369	0.0159407	0.0386394	0.0214372	0.019291	0.0402784	0.181978	0.175855	0.0125178	0.120496	0.0341739	0.00762568	0.0822122	0.048843	0.081601	0.158785	0.0534293	0.027857	0.00215764	0.0123537	0.0665149	0.0417363
GSM990330	52	0.00613396	0.147744	0.00961714	0.0111344	0.00772896	0.0258581	0.0980367	0.0742343	0.012778	0.0097382	0.0237943	3.63719e-05	0.166918	0.0216556	0.0507713	0.161921	0.021473	0.163275	0.0883178	0.0173639	0.0590721	0.00318041	3.63719e-05	0.0071242	0.00433071	0.131123	0.0396092	0.00830277	0.0267794	0.01348	0.0227276	0.0416129	0.173158	0.256159	0.0168333	0.0970723	0.0199993	0.000312341	0.0247079	0.0581005	0.0443204	0.151702	0.0463007	0.036801	3.63719e-05	0.00879602	0.0987502	0.0140033
GSM990353	52	0.00908744	0.120654	0.00675829	0.0124006	0.0127782	0.014569	0.0676167	0.0872287	3.10947e-05	0.0119662	0.0223624	0.0181126	0.191015	0.0155225	0.142264	0.102981	0.024021	0.111723	0.0577099	0.0155289	0.0263288	0.00151858	0.0303809	7.11697e-05	0.01357	0.175204	0.037685	0.0171576	0.0202986	0.0131086	0.013314	0.0641668	0.198037	0.17973	3.10947e-05	0.0791344	0.037147	0.00214449	0.0177416	0.0467876	0.0843715	0.149228	0.0535946	0.0400993	3.10947e-05	0.00633912	0.0648193	0.00295546
GSM990356	52	3.31434e-05	0.131403	0.0155975	3.31434e-05	0.0130449	0.0198755	0.0499884	0.177272	0.00168635	0.00284719	0.0230237	0.0112743	0.122802	0.0253915	0.126959	0.055303	0.0275309	0.150128	0.0262386	0.0269357	0.0347073	3.31434e-05	3.31434e-05	3.31434e-05	0.00877721	0.0408067	0.0539243	0.0111036	0.0358872	0.0121756	0.0104779	0.0330025	0.146598	0.201999	0.00433284	0.0935945	0.0224508	0.00667511	0.0490887	0.0574635	0.0776273	0.137059	0.0186069	0.0321604	3.31434e-05	0.00744811	0.047721	0.0144363
GSM990439	52	0.00163734	0.0693703	3.80841e-05	0.000382596	0.00590811	0.0195914	0.00794343	0.0377733	3.80841e-05	3.80841e-05	0.0111624	0.00327453	0.0805382	0.0145672	0.131295	0.00998793	0.0265049	0.0442366	0.00905472	0.00644965	0.0271778	3.80841e-05	0.0111496	0.0084925	0.00965269	0.08113	0.0297302	0.00838633	0.0125942	0.0242279	0.0117893	0.0201032	0.0471995	0.128303	0.00137848	0.0475669	0.0136291	3.80841e-05	0.00699632	0.0461538	0.0715557	0.119268	0.0449813	0.0117193	3.80841e-05	0.00562973	0.0534909	0.0180888
GSM990448	52	0.00645825	0.0815612	0.00245026	0.0086696	0.0160242	0.0253184	0.0783918	0.0531694	0.010824	0.0351068	0.0187441	0.00633396	0.115523	0.0207946	0.0865859	0.0155152	0.0119704	0.0750167	0.0562622	0.000198095	0.0315364	0.00183895	0.0476538	0.00849205	0.00317433	0.0713496	0.0696434	0.0173287	0.0137289	0.00796931	0.0141281	0.0120053	0.11415	0.0841191	0.000528682	0.0737575	0.0380161	2.45309e-05	0.0261045	0.0293505	0.0808067	0.149648	0.0632809	0.0385842	0.00974244	0.00612196	0.0642909	0.0256735
GSM990474	52	0.00361268	0.0852889	0.00553345	0.0132156	0.00547796	0.0178971	0.0131545	0.0474822	2.66953e-05	0.00663862	0.0150836	0.00135052	0.142724	0.00972247	0.11916	0.0414495	0.0181257	0.0720485	0.0295969	0.0163281	0.0340206	0.00224736	2.66953e-05	0.00677054	0.00366291	0.0661304	0.0189482	0.00856527	0.0155485	0.00777292	0.01171	0.0266275	0.0928889	0.167755	0.0145517	0.0571274	0.0204449	2.66953e-05	0.0482501	0.0474317	0.0646181	0.137786	0.0386563	0.0248809	0.00589371	0.0109142	0.0532233	0.015297
GSM990485	52	0.00947716	0.101058	0.00580052	0.0307165	0.0145688	0.0254023	0.0529705	0.0692319	4.1157e-05	0.0253558	0.0225866	0.00338251	0.135376	0.0218252	0.102042	0.0292563	0.0353266	0.113177	0.030984	0.0130761	0.025597	0.010498	0.0230451	0.00774061	0.00755916	0.0797922	0.0402126	0.015165	0.020686	0.0186599	0.0143892	0.0466407	0.128998	0.186041	0.00349672	0.067953	0.0489534	0.0045953	0.0309961	0.0620434	0.0729828	0.15923	0.0233043	0.0345143	0.00625658	0.0122143	0.0638242	4.1157e-05
GSM990497	52	0.00620975	0.0780619	0.0121521	0.0231284	0.0103334	0.0193651	0.0380092	0.0625482	0.00652979	0.00704454	0.0286182	3.92069e-05	0.117915	0.00796423	0.127872	0.0603273	0.0267498	0.200652	0.0333423	0.0223196	0.0321082	0.00035571	0.016103	0.000656178	0.0084257	0.066474	0.0376901	0.0175146	0.00525869	0.0141949	0.00681782	0.0196356	0.136284	0.184023	0.0155973	0.0568146	0.0265335	3.92069e-05	0.0212505	0.0504273	0.0588644	0.148476	0.0497437	0.0310873	0.00530516	3.92069e-05	0.0837651	0.0208455
GSM989930	51	0.0047734	0.0868575	0.00351029	0.000739285	0.0059577	0.0226624	0.0128176	0.0466148	0.00556061	0.000945192	0.0179487	0.0052863	0.0747294	0.0166308	0.0841984	0.0343731	0.0548915	0.0453418	0.0140219	0.00272662	0.0231919	0.00999815	0.00209684	0.00681398	0.00653641	0.0526591	0.0480275	0.0133872	0.0150433	0.0206918	0.0065022	0.0272105	0.0825435	0.110367	0.0106397	0.0460152	0.0224285	3.68619e-05	0.0305668	0.0779441	0.0707775	0.137817	0.0170789	0.0215165	3.68619e-05	0.00886279	0.0467143	0.0262381
GSM990092	51	0.00681479	0.126385	0.00670906	0.0405196	0.00679922	0.0255456	0.0995041	0.11966	0.0100512	0.009174	0.015568	0.0104049	0.184891	0.0218015	0.108963	0.0632578	0.0266574	0.120077	0.0731629	0.0277179	0.061294	3.63672e-05	0.00182929	0.0020513	0.0100298	0.11522	0.0403624	0.00331339	0.0355766	0.0156268	0.00344374	0.0627748	0.171038	0.278415	0.0217535	0.134625	0.0758197	0.00304501	0.0349014	0.0414518	0.0581624	0.143305	0.0456458	0.0476345	0.00382235	0.00992599	0.0716469	0.0242879
GSM990095	51	0.00516572	0.186805	0.0211462	0.0265775	0.0197263	0.0249651	0.025989	0.0914839	0.00846257	0.00592195	0.0360793	0.00409259	0.242008	0.0238717	0.183639	0.0943088	0.0272391	0.17359	0.0838847	0.0396494	0.0648873	0.00483735	0.00191325	0.0185444	0.0244909	0.25113	0.0397458	0.00222307	0.0517342	0.0164611	0.0191114	0.0530945	0.216746	0.253706	0.00162097	0.136869	0.0837918	0.00832734	0.0721406	0.0411695	0.0690238	0.157755	0.155144	0.0354756	2.95766e-05	0.00344169	0.0821119	0.0179667
GSM990107	51	0.0129794	0.0732569	0.00481254	0.00282401	0.00999997	0.0166724	0.0347112	0.0770402	0.0101765	3.56045e-05	0.0131755	0.0197271	0.0776908	0.019368	0.0774065	0.0361093	0.00467545	0.0974215	0.0196565	0.0219043	0.0387191	3.56045e-05	0.0338405	3.56045e-05	0.0100641	0.0835649	0.0476343	0.024155	0.0173909	0.0190109	0.0160417	0.0391893	0.123128	0.0880068	0.0168292	0.0688306	0.013765	0.00021686	0.0378754	0.0681465	0.0568626	0.134256	0.0280325	0.0206695	0.00823223	0.0158951	0.0554912	0.00797699
GSM990271	51	0.00227534	0.118389	0.0132897	0.00397411	0.0159015	0.020446	0.0540366	0.122366	0.00123962	0.00597271	0.00699539	0.00209189	0.179725	0.0236921	0.13226	0.0404464	0.0317142	0.0631158	0.0537258	0.0501643	0.0358415	0.004252	2.38746e-05	0.0048181	0.000902176	0.0735688	0.0559846	0.0023081	0.0186125	0.00853252	0.0155702	0.0285618	0.111079	0.0857355	0.00707237	0.116107	0.0181446	2.38746e-05	0.0341469	0.0333419	0.0487689	0.199144	0.0439417	0.029686	0.00480824	0.0149367	0.0416815	0.00885379
GSM990305	51	0.00115617	0.100495	0.00787777	0.0266505	0.00506271	0.00897706	0.0701821	0.100263	0.00357796	0.0146538	0.0529244	0.00797168	0.11822	0.014313	0.125004	0.055543	0.0262608	0.0881065	0.0399012	0.0293433	0.0300259	0.00362676	0.0232638	0.00552194	4.37513e-05	0.073293	0.0245258	0.00728108	0.0278983	0.0178032	0.0136146	0.0352878	0.135445	0.122352	4.37513e-05	0.0635989	0.0261189	0.00610906	0.0231033	0.0304132	0.0859394	0.151302	0.0245249	0.0341197	0.00233683	0.0101874	0.0646192	0.00594243
GSM990312	51	0.006317	0.13612	0.00605611	0.00730769	0.0164153	0.0172526	0.0971248	0.121474	0.00844495	0.0173747	0.0203651	0.0134006	0.173657	0.0145099	0.11998	0.105735	0.0221033	0.155886	0.0615603	0.0313442	0.0464755	0.00808788	0.00432431	0.00618145	0.00333076	0.153754	0.0497785	0.00905171	0.0246934	0.00579822	0.0232226	0.0763942	0.194203	0.191896	3.10861e-05	0.118328	0.035725	0.00171529	0.0964478	0.0608651	0.0702064	0.17237	0.0863955	0.0404079	0.000980883	0.0107731	0.0670614	0.0287188
GSM990444	51	4.1662e-05	0.0744728	0.0052728	0.000193045	0.0017557	0.0201625	0.0210498	0.0375609	0.0123134	4.1662e-05	0.0680274	4.1662e-05	0.117588	0.0311692	0.0511165	0.0961232	0.0123889	0.0491663	0.0224387	0.0105478	0.0359786	0.00772002	4.1662e-05	4.1662e-05	0.00370627	0.0529969	0.0475202	0.0177815	0.0152464	0.0510436	0.014582	0.0292528	0.0946223	0.132152	4.1662e-05	0.0514541	0.0380441	4.1662e-05	4.1662e-05	0.0300484	0.112594	0.184097	0.0715143	0.0140247	0.00589121	0.00352208	0.0662058	0.0145207
GSM990526	51	0.0135469	0.109276	0.0021429	0.00723039	0.00957243	0.0383175	0.0105222	0.067758	0.0111553	0.0197998	0.0435204	4.44419e-05	0.183693	0.0257515	0.0882871	0.0581216	0.0400765	0.0361177	0.0382289	0.0207638	0.0583999	0.0233489	4.44419e-05	0.0153835	0.00835944	0.063715	0.0324998	0.0195753	0.0183886	0.0155441	0.0209099	0.0246864	0.0916053	0.218948	0.000460054	0.0666061	0.0164177	0.00602048	0.0476846	0.0546169	0.097756	0.138204	0.0140216	0.0227797	0.00627012	0.00699115	0.0691588	0.0165326
GSM989955	50	0.00838357	0.0684517	0.00699297	0.00790339	0.0214438	0.0335153	0.025912	0.0333499	0.00202106	0.0150557	0.0297631	0.000785578	0.0775323	0.0274158	0.125496	0.0386459	0.0339065	0.0654703	0.0371949	0.00547784	0.0410593	0.0223932	0.00458852	0.0126003	0.0130857	0.037186	0.0445504	0.0115945	0.0146738	0.0460209	0.0295402	0.0219241	0.0888615	0.13095	0.0220688	0.034987	0.00606824	4.22813e-05	0.00592397	0.06901	0.0989132	0.141322	0.0354363	0.0207716	0.0080174	0.00434878	0.0596882	0.0423866
GSM989972	50	0.0039743	0.104335	0.0108659	0.010629	0.0214091	0.0226885	0.0338731	0.0760695	0.00318761	0.0237572	0.0462915	0.00703621	0.129242	0.0237148	0.128602	0.0932594	0.0420756	0.0960176	0.038981	0.0258726	0.0430998	0.0173359	0.0483971	0.0070902	0.00598634	0.0624263	0.0387546	0.0167361	0.0231189	0.0177898	0.0168929	0.0303526	0.148701	0.272765	0.00234015	0.082813	0.0249181	0.000313248	0.018579	0.0572393	0.0820243	0.160209	0.0868851	0.0398568	0.00259189	0.0141434	0.0915223	0.0329316
GSM989991	50	0.0100415	0.0796513	0.00132171	0.0152575	0.0157239	0.0161195	0.0514902	0.0723589	0.00811484	0.0109803	0.0365904	0.00407433	0.152348	0.0241899	0.151312	0.0416531	0.0436008	0.074627	0.0310292	0.0121737	0.0636207	0.00596376	0.0681513	0.0119367	0.0178969	0.0595122	0.0999373	0.0154763	0.0236922	0.0270947	0.0122267	0.028072	0.154018	0.203935	0.0137957	0.0669923	0.017605	0.000672161	0.0387176	0.0482302	0.0830088	0.167712	0.077591	0.0317553	0.00259712	0.00203453	0.101755	0.0354276
GSM989993	50	0.0123228	0.0852354	0.00253704	3.7135e-05	0.0227841	0.024606	0.00760809	0.054694	0.00499391	0.00105691	0.0349188	0.0144816	0.085324	0.0170137	0.0946715	0.0269289	0.0303788	0.0562066	0.041509	0.0146447	0.0309713	0.0126344	3.7135e-05	0.00385609	0.00640949	0.0346809	0.0355116	0.0230727	0.0154544	0.0153036	0.0111237	0.0326965	0.0993808	0.153794	0.00152675	0.0419593	0.00832358	3.7135e-05	0.0200172	0.0239922	0.0745308	0.126691	0.0408713	0.0127959	3.7135e-05	0.0129103	0.0596719	0.036751
GSM990111	50	0.00906125	0.132698	0.0065649	0.0163954	0.0113553	0.0190408	0.088311	0.126843	0.00986287	0.0212503	0.0195018	0.00540498	0.161237	0.0158766	0.173879	0.066859	0.0281313	0.223588	0.0234269	0.0208477	0.0441772	3.44341e-05	0.00184108	0.00676579	0.00918286	0.13767	0.102144	0.0152147	0.0171536	0.020609	0.0116977	0.0699074	0.15549	0.194207	3.44341e-05	0.130446	0.0592501	0.000836176	0.0670926	0.0287179	0.0885396	0.153005	0.171351	0.0368634	0.000889685	0.0128979	0.125841	0.0212257
GSM990275	50	0.00966754	0.116343	0.00314244	0.0296053	0.00800463	0.017286	0.0324385	0.135537	3.06817e-05	0.00636911	0.0479073	0.00692069	0.148909	0.0132949	0.0761518	0.0781521	0.0252085	0.0574715	0.0376329	0.0380522	0.0554295	0.00932804	0.0837824	0.00509444	0.00196487	0.0966156	0.0372135	0.0196709	0.0115856	0.00930986	0.0195784	0.0450594	0.135228	0.193222	0.000795803	0.093771	0.0328242	3.06817e-05	0.00998066	0.0473698	0.084208	0.139064	0.0529389	0.0428458	0.00587328	3.06817e-05	0.0651168	0.0019246
GSM990291	50	0.00236409	0.0959635	0.00683505	0.0265156	0.00702061	0.0160172	0.0164619	0.0509888	0.00151191	0.0126823	0.0271877	0.00490838	0.155449	0.0183923	0.0891084	0.0566156	0.0263303	0.0867681	0.0110274	0.0111613	0.0416461	0.0083934	0.0077856	0.00995204	0.0057825	0.0677779	0.0898249	0.00805715	0.0266907	0.0196911	0.01623	0.0400679	0.0962884	0.12109	3.27824e-05	0.0429807	0.00833466	0.00200985	0.0208054	0.0569657	0.0754312	0.162972	0.0229589	0.043259	3.27824e-05	0.0074633	0.0675002	0.00366392
GSM990329	50	0.00964595	0.0890981	0.0159853	0.0287639	0.0140524	0.0142227	0.0204712	0.11576	0.0146432	0.0272391	0.0149109	0.0212438	0.144881	0.0174798	0.0961728	0.0990066	0.0378977	0.185958	0.0430143	0.0369852	0.0527129	0.00264675	0.0255313	0.0066307	0.00560622	0.109316	0.0409551	0.0179097	0.0265956	0.020829	0.0127375	0.0839858	0.12257	0.194756	0.00314364	0.0796123	0.0213134	3.67523e-05	0.0414395	0.0247971	0.0517031	0.155159	0.0227622	0.0280177	0.00569923	0.0154377	0.0763417	0.0132373
GSM990343	50	0.000292192	0.0646985	5.16314e-05	0.0543163	0.0121633	0.0208893	0.0202453	0.103442	0.0446538	0.00334166	0.0240509	0.00581906	0.111855	0.0136717	0.163084	0.0611683	0.0264709	0.124183	0.0552498	0.00303642	0.0501417	0.00836053	5.16314e-05	0.00404263	0.0156428	0.105047	0.039389	0.0132276	0.0109858	0.0226581	0.0288569	0.0460421	0.164	0.186339	5.16314e-05	0.102215	0.036324	5.16314e-05	0.036365	0.0422711	0.0735521	0.183825	0.0870004	0.056877	5.16314e-05	0.0251372	0.0625346	0.0218777
GSM990354	50	0.0078989	0.112514	0.00303285	3.18695e-05	0.00730523	0.0120122	0.116288	0.13947	0.0016957	0.00574212	0.0273822	0.0017392	0.169059	0.00930207	0.105625	0.0832981	0.0309492	0.143423	0.0589449	0.026278	0.0644785	3.18695e-05	0.00366132	0.00266326	0.0130315	0.133023	0.0568145	0.00580913	0.0345249	0.0155127	0.0246109	0.0582686	0.183803	0.262815	0.0129754	0.141697	0.0344416	0.0067182	0.0155322	0.0434402	0.0645651	0.221391	0.123357	0.0340774	3.18695e-05	0.00699512	0.105477	0.0155817
GSM990394	50	0.00979826	0.0815598	0.0124562	0.00960577	0.00700162	0.0190415	0.0249998	0.102062	0.000521992	2.67873e-05	0.0284153	2.67873e-05	0.154291	0.0143213	0.0695081	0.0653026	0.0275796	0.0704919	0.0230932	0.0296999	0.0514218	0.00428027	0.00255606	0.00446773	0.006528	0.0718972	0.055738	0.0165187	0.0294687	0.0122856	0.0189843	0.0489339	0.0980353	0.148718	2.67873e-05	0.0756275	0.0366471	2.67873e-05	0.0239022	0.0362695	0.0775463	0.142538	0.0323636	0.0135403	0.00352794	0.00844848	0.0711977	0.0271511
GSM990609	50	0.0059161	0.0802197	0.000298928	0.0166031	0.0156169	0.0321768	0.0229422	0.0912091	0.00980448	0.0164756	0.0310838	0.00639614	0.157656	0.0183341	0.0975857	0.0837897	0.0286039	0.12478	0.0646064	0.0290716	0.0622055	3.1805e-05	3.1805e-05	0.015087	0.0115554	0.0755958	0.0480232	0.00699782	0.0231413	0.01714	0.0152732	0.0297547	0.147475	0.189578	3.1805e-05	0.0857426	0.0508328	0.00763471	0.0335524	0.0274567	0.0828552	0.149229	0.0581125	0.03102	3.1805e-05	0.0127199	0.0807157	0.0243051
GSM989917	49	0.00220665	0.124892	3.82408e-05	0.0190072	0.0179832	0.0244887	0.0602251	0.0897702	0.00574352	0.00333834	0.0615227	3.82408e-05	0.157478	0.0133748	0.136109	0.0458595	0.0389907	0.135731	0.0583556	0.0190217	0.0482288	0.00218817	0.0767861	0.00778404	0.00331011	0.0716332	0.0812631	0.0238025	0.0279171	0.0243029	3.82408e-05	0.0190979	0.182911	0.179883	0.00603656	0.0546253	0.0464067	0.00312376	0.052044	0.0600287	0.0698757	0.166385	0.0562457	0.0381692	3.82408e-05	0.0143629	0.0991154	0.0446112
GSM989936	49	0.00961203	0.165029	0.00959584	0.000191359	0.0212888	0.0237354	0.0793167	0.132922	0.00324187	3.33254e-05	0.0184927	0.00441594	0.18857	0.0161054	0.150324	0.056101	0.0224358	0.187252	0.0503842	0.0595335	0.0685539	0.0025503	3.33254e-05	0.011187	0.00432486	0.150583	0.0648335	0.0142431	0.0365791	0.0172385	0.0119704	0.0522726	0.195495	0.155794	0.00893473	0.109425	0.0501771	0.00857823	0.0334925	0.0541067	0.0748541	0.181224	0.0821124	0.0828098	0.0049556	0.0177815	0.092136	0.0257076
GSM989965	49	0.00648149	0.0812335	0.00720624	0.00573545	0.0102062	0.0203392	0.0297908	0.0890535	0.00105296	0.0119108	0.0826532	0.00155769	0.113289	0.0203663	0.102229	0.0679049	0.0311456	0.0854762	0.0451554	0.0173823	0.0504061	0.0124474	0.0130448	0.0146119	0.00520363	0.108412	0.0651903	0.00913035	0.0206637	0.0331376	0.00889623	0.0355532	0.127849	0.133224	0.0143092	0.0589525	0.0306189	4.38281e-05	0.0333746	0.0446178	0.0593506	0.154231	0.0563962	0.0445142	0.00209601	0.0135967	0.0722621	0.0200946
GSM990120	49	0.00401889	0.077605	0.00321622	2.49341e-05	0.00484734	0.0153583	0.0235466	0.0557021	0.0116479	2.49341e-05	0.00726434	2.49341e-05	0.104143	0.0132558	0.0956514	0.0450482	0.0304552	0.0477457	0.0117776	0.0112181	0.0332026	0.000245824	0.00115129	0.00634805	0.00302181	0.0815256	0.0384375	0.0202175	0.0132984	0.0151153	0.0140267	0.0209876	0.093352	0.131115	0.0161318	0.0654006	0.00633725	2.49341e-05	0.0140559	0.0366549	0.0592429	0.119495	0.0143355	0.0255509	0.00464899	0.0193636	0.0458319	0.00544112
GSM990270	49	0.00417322	0.105406	0.0107676	0.00722334	0.0133484	0.0230328	0.0194173	0.0958255	0.0175024	2.76231e-05	0.0284819	0.00192054	0.147011	0.0185081	0.109583	0.0453526	0.0337969	0.109509	0.0221213	0.00999109	0.0230508	0.001637	0.0772568	0.0076309	0.00154037	0.0843191	0.0762805	0.0128364	0.0320218	0.00790009	0.0111824	0.0177047	0.0952922	0.127102	2.76231e-05	0.0994069	0.0209012	2.76231e-05	0.0125739	0.0221449	0.070587	0.104191	0.0220719	0.0266585	2.76231e-05	0.00670085	0.046725	0.00923616
GSM990433	49	0.002768	0.0627651	0.000416022	0.00283977	0.00971457	0.0143429	2.75539e-05	0.0854077	2.75539e-05	2.75539e-05	0.0171918	2.75539e-05	0.0904479	0.0112556	0.0915138	0.0071468	0.0171901	0.0355075	0.0182712	0.00933423	0.0399905	0.000908353	2.75539e-05	2.75539e-05	0.00581082	0.0192599	0.0269738	0.00867203	0.00909855	0.0142988	0.0074049	0.0119132	0.0241847	0.0278182	0.000823786	0.0466871	0.00857078	0.00784675	0.000387781	0.0341462	0.0788411	0.107801	0.00682479	0.0110927	0.0026209	0.000280484	0.0490284	2.75539e-05
GSM990530	49	0.0236707	0.0798829	0.00720791	3.32093e-05	0.0137656	0.0208737	0.0223475	0.0926154	3.32093e-05	0.0168721	0.0067536	0.00892706	0.15176	0.0193992	0.120035	0.0320084	0.0274963	0.0520938	0.0214256	0.00658137	0.0333053	0.0128342	0.000185887	0.00474489	0.0171732	0.0413483	0.0648366	0.0105624	0.0176034	0.016766	0.0165358	0.0384547	0.107044	0.083887	0.0157164	0.0596051	0.0166165	0.00203308	0.0167233	0.0609345	0.0858935	0.124482	0.0183559	0.0213657	0.00114791	0.0193105	0.0615016	0.0275567
GSM990535	49	0.00870764	0.067983	0.00672107	4.54123e-05	0.0197086	0.0341425	0.0227679	0.0683588	0.0179191	0.0266773	0.0287338	0.0131687	0.130731	0.0191961	0.120771	0.0765142	0.0227922	0.0749849	0.029802	0.00102091	0.0405818	0.0108661	0.00660857	0.011357	0.0138917	0.0186031	0.0388151	0.0224256	0.01635	0.0453131	0.00613975	0.0232101	0.0780925	0.119914	0.0128523	0.0388926	0.0169665	0.00182196	0.0601041	0.0468807	0.089964	0.119641	0.0661772	0.0253878	0.00499448	0.0169251	0.0697011	0.0202476
GSM989838	48	4.14299e-05	0.0776128	0.0069529	0.0202464	0.017419	0.0188537	0.0851832	0.110185	0.0141442	0.0123535	0.0262744	0.00733053	0.0738082	0.0208866	0.123854	0.0453675	0.0329584	0.134309	0.048183	0.0258089	0.0406919	0.0161678	0.000175263	0.0106251	0.00551086	0.0919246	0.0792813	0.0145933	0.016911	0.0176371	0.0163736	0.0447599	0.085344	0.207784	0.0305548	0.0682563	0.0173384	0.000792972	0.0537364	0.0377442	0.0745828	0.139281	0.0810067	0.0200957	0.00867809	0.0152892	0.0726903	0.0247115
GSM989947	48	0.00741494	0.107482	0.00558344	0.00974268	0.0077278	0.0271665	0.00550832	0.0748635	0.00824066	0.0137076	0.0314509	3.94634e-05	0.175724	0.00508751	0.14807	0.0496726	0.0303777	0.100707	0.0528183	0.0167837	0.0555176	0.00578616	0.0268832	0.00573863	0.0145291	0.0937667	0.0373034	0.000875321	0.0209658	0.0115714	0.00113075	0.0247052	0.192359	0.210153	0.0125046	0.0829761	0.0211579	0.00382898	0.0502495	0.0386385	0.0572113	0.153197	0.0368977	0.0371575	0.00446923	0.00635853	0.0990905	0.0412234
GSM989968	48	0.00599641	0.0965378	0.00449795	0.0090113	0.0229659	0.0279187	0.0250106	0.0530157	0.00976509	0.0150968	0.056536	0.00685466	0.0953653	0.017612	0.141017	0.0442605	0.0256475	0.0627271	0.0343796	0.00946754	0.0476326	0.0079199	0.015083	0.0127508	0.00595544	0.0469892	0.03589	0.0165237	0.0145627	0.0383146	0.00767943	0.0258378	0.100978	0.0883064	3.41072e-05	0.0582138	0.0142847	0.00174473	0.0277631	0.0492775	0.0859637	0.124635	0.0498237	0.0270912	0.00165989	0.0143476	0.0719944	0.0283838
GSM990070	48	0.0133798	0.074401	0.00784278	0.00285663	0.0191316	0.0153338	0.0121042	0.0454516	3.15704e-05	0.0128677	0.0223702	0.0345208	0.115116	0.0189651	0.1656	0.0412857	0.0327905	0.0448767	0.0128211	0.0140014	0.044584	0.00759717	3.15704e-05	0.00214098	0.0129339	0.114322	0.0356291	0.0113009	0.0150915	0.0256293	0.00756153	0.0112296	0.0878481	0.111543	0.000810664	0.073803	0.0132731	3.15704e-05	0.0179312	0.0491723	0.0676086	0.135759	0.0436124	0.021889	3.15704e-05	0.0139966	0.0397604	0.0119574
GSM990072	48	0.0131198	0.085792	0.00871339	0.0108164	0.0172059	0.0248355	0.0401794	0.0836855	0.027591	0.00984587	0.0678234	0.0100415	0.153674	0.0264715	0.132663	0.0777104	0.0264547	0.158008	0.0584216	0.0223699	0.0783322	0.00808129	0.0295874	0.0137673	0.00792297	0.12434	0.0456755	0.00805947	0.017738	0.0683915	0.0248872	0.0352056	0.165411	0.207936	0.00426011	0.105213	0.0283243	0.00487852	0.0305525	0.045516	0.0541888	0.155918	0.110721	0.0318337	0.00360979	0.0200988	0.0855008	0.0348626
GSM990081	48	0.00662394	0.141017	0.0115492	0.0154319	0.0124082	0.0155765	0.0698066	0.079318	0.0100514	0.0261447	0.0261009	0.000205524	0.151667	0.0209402	0.105246	0.0451305	0.0161554	0.187417	0.0302509	0.031704	0.0601957	0.00498807	0.0745835	0.00329682	0.00836892	0.118004	0.0506772	0.024626	0.0120887	0.0171266	0.0185343	0.0280471	0.170096	0.1072	0.0156087	0.0807032	0.0247561	0.00622192	0.044753	0.0349408	0.0689556	0.157179	0.0537168	0.0367454	0.00247941	0.0108927	0.0730424	0.0255907
GSM990085	48	0.00822866	0.0741725	0.00200412	0.0158652	0.0198335	0.0255891	0.0206372	0.0630773	0.0096614	0.0164222	0.0180757	0.0421627	0.121725	0.0234923	0.101943	0.0731863	0.029826	0.0291191	0.0300145	0.00703395	0.0533853	0.0112187	0.00882477	0.000900302	0.00712989	0.0548497	0.0393258	0.00577511	0.0161684	0.0244055	0.02474	0.0104936	0.0750629	0.0897811	0.00494412	0.0547013	0.0380995	3.72568e-05	0.0323494	0.0348904	0.07961	0.103114	0.00979141	0.0106546	3.72568e-05	0.0122739	0.0495779	0.0228004
GSM990288	48	0.00875887	0.119692	0.00694408	0.0365022	0.0142479	0.0298733	0.0339498	0.127851	0.0106541	0.0165062	0.0183787	0.0105555	0.157862	0.0193055	0.0805934	0.0312967	0.03004	0.0697955	0.0375078	0.0200239	0.0457551	0.00872646	0.0584862	0.00799667	0.0066335	0.0605075	0.0505698	0.0197316	0.0411977	0.0208462	0.00814603	0.0147846	0.0941202	0.131059	3.72811e-05	0.0849999	0.0617992	0.00336525	0.03554	0.068069	0.0911778	0.115566	0.0273274	0.0397425	0.00215387	0.0134173	0.0571217	0.0330943
GSM990295	48	0.0072075	0.14916	0.00346253	0.0144491	0.0111545	0.0176041	0.0972274	0.143421	0.00246969	0.00712341	0.01057	2.82977e-05	0.118626	0.0151237	0.0953106	0.0533567	0.0250321	0.141495	0.0504105	0.0174713	0.0635753	0.0122938	2.82977e-05	0.0144051	0.00904992	0.0838595	0.0799835	0.00639671	0.0200027	0.0151316	0.0147532	0.0945902	0.16466	0.231661	0.0123732	0.122991	0.0107201	2.82977e-05	0.0342711	0.0376348	0.0737582	0.222971	0.0452994	0.0747643	0.00320895	0.0134165	0.0914955	0.0151005
GSM990349	48	0.00938651	0.118448	0.0113384	0.00830258	0.0111627	0.0139159	0.0179683	0.0581134	0.0017845	0.00704617	0.01241	0.0109978	0.136937	0.0121886	0.084366	0.0125533	0.0369005	0.106073	0.0318565	0.0080372	0.0208118	0.00222304	0.00972209	0.0035669	0.00657662	0.0775019	0.0389444	0.0126047	0.00756075	0.013328	0.0146522	0.0168721	0.0927772	0.13816	0.0156147	0.0340472	0.0198194	3.3305e-05	0.0303262	0.0543879	0.074801	0.137574	0.0461372	0.0232971	0.00590609	0.0063958	0.0671617	0.0167451
GSM990450	48	0.00328665	0.0311977	3.04391e-05	0.0038584	0.00673846	0.0287196	0.0105602	0.0427841	0.00518977	0.0106571	0.0171085	3.04391e-05	0.10752	0.0139687	0.0842645	0.00990656	0.0253484	0.0554262	0.023148	0.0126094	0.0272175	0.000174015	0.078018	0.00313022	0.00623351	0.0419301	0.0362647	0.0191533	0.017182	0.00772089	0.0225164	0.00619641	0.119776	0.111646	3.04391e-05	0.0531874	0.00669879	3.04391e-05	0.0175655	0.059001	0.0837586	0.12973	0.023044	0.0356539	3.04391e-05	0.0026125	0.0616664	0.0128687
GSM990472	48	0.0297162	0.0423491	0.00394375	0.00560236	0.00981986	0.0171509	0.00668583	0.029249	0.00233399	0.00548784	0.0109929	0.00766856	0.0892719	0.0134645	0.115406	0.0278412	0.018008	0.0381927	0.0290292	0.00263727	0.0262056	0.00385661	0.0544	0.00280474	0.00649993	0.0132141	0.0322369	0.00986692	0.0177673	0.0194063	0.0232166	0.0196665	0.0369953	0.0737529	0.0148235	0.0308744	0.00494554	0.00123258	0.0139847	0.0429433	0.0628434	0.130957	0.00977905	0.0101278	0.00545386	0.00407309	0.034021	0.00853436
GSM990505	48	0.00138895	0.177826	0.00139066	0.0165294	0.0143963	0.020177	0.0640956	0.084837	0.00365703	0.00921763	0.0158319	0.00211038	0.121614	0.0116915	0.108616	0.0286164	0.0311352	0.16607	0.054827	0.0147194	0.0534864	2.57182e-05	2.57182e-05	0.000865981	2.57182e-05	0.11387	0.0324304	0.0165749	0.0276848	0.011257	0.00690712	0.0331932	0.167449	0.262331	0.0130346	0.04606	0.0201933	2.57182e-05	0.0197735	0.0578846	0.0727918	0.158025	0.0462646	0.0320855	0.0031509	0.0141091	0.0661512	0.0108216
GSM989885	47	0.0023513	0.0979635	0.00813239	0.0015557	0.0262988	0.0126996	0.0254611	0.0427005	0.0186827	0.0110832	0.0250662	0.0160331	0.0616921	0.00941401	0.0959527	0.0258699	0.0406058	0.0531534	0.05812	0.0113486	0.0322399	0.0179415	0.0271877	0.0201064	0.0118207	0.0377264	0.0428508	0.0107889	0.00757809	0.0233581	0.0177989	0.0180886	0.0930304	0.122441	0.0147684	0.0780482	0.012555	0.00211873	0.0246693	0.0451219	0.0843695	0.168673	0.0352552	0.0131647	0.00141621	0.0135725	0.0640054	0.0466789
GSM989975	47	0.0110264	0.0876576	0.00883982	0.00297639	0.0167236	0.0183618	0.0150323	0.038469	0.00679668	0.0120036	0.0174702	3.60913e-05	0.0943057	0.012152	0.0760919	0.0656378	0.0252354	0.0728401	0.0271317	0.00475883	0.0463478	0.0066209	0.00124619	0.00107454	0.00613636	0.059659	0.0431908	0.0106561	0.0156723	0.0276381	0.0112306	0.0153758	0.0786607	0.0680807	0.00329605	0.0480571	0.0211091	0.00106504	0.0372419	0.0398457	0.0624238	0.154429	0.0538658	0.0269989	0.000990398	0.0158114	0.0715113	0.0222359
GSM989984	47	0.00432473	0.160994	0.00914496	0.0024814	0.0134046	0.0222519	0.0561777	0.0924036	0.0151446	0.00552848	0.0314941	0.00894928	0.112577	0.0229613	0.172639	0.0460934	0.0340932	0.139168	0.0597954	0.0202207	0.0470751	0.0117631	0.00102831	0.00808422	0.0110783	0.111826	0.0429186	0.00709423	0.0164026	0.0240738	0.00267865	0.0425541	0.15234	0.226588	0.00762898	0.085236	0.0325214	0.00464261	0.059641	0.0322259	0.0847136	0.14528	0.0414104	0.0449475	0.00367708	0.00571593	0.111709	0.0289423
GSM989994	47	0.00650201	0.0711607	0.000948825	0.0141129	0.00113145	0.0215209	0.000374768	0.0420778	3.9161e-05	0.00272863	0.0350875	3.9161e-05	0.101905	0.0147514	0.120115	0.0271227	0.0293387	0.0599415	0.0331242	0.0124325	0.0291468	0.00616848	0.0488269	0.00778754	0.0107768	0.0472981	0.0420075	0.00894994	0.0245404	0.0322277	0.00333528	0.00406564	0.104289	0.157369	3.9161e-05	0.046706	0.0124528	0.00701514	0.0164611	0.0406629	0.0812131	0.133361	0.0488425	0.0183278	0.0033122	0.0070306	0.0636035	0.0249864
GSM989995	47	0.0173002	0.138035	0.00841868	0.00524237	0.019344	0.0291361	0.0440515	0.0595673	0.0127142	0.00880495	0.0443906	0.00641622	0.116666	0.0173926	0.0903306	0.0346644	0.0286322	0.105421	0.0539294	0.0256749	0.0396301	0.0155428	0.0317203	0.0176007	0.0109068	0.096315	0.0464727	0.0137071	0.0403596	0.0235712	0.027269	0.02709	0.126079	0.245015	0.0292958	0.0749264	0.0341814	0.00725866	0.0569163	0.0472959	0.0946287	0.17772	0.0585049	0.0367073	0.00936991	0.0148306	0.0869198	0.0364083
GSM989999	47	0.00772322	0.0483287	4.20255e-05	0.00173961	0.00779673	0.0241557	0.00245867	0.0313578	4.20255e-05	0.0145641	0.0157882	0.00284839	0.0911962	0.0160151	0.0978704	0.0333332	0.0272928	0.0555738	0.0274152	0.00550276	0.0404062	0.00696159	0.00516139	0.00732002	0.00930565	0.0298795	0.030445	0.0131402	0.0174916	0.0149968	0.0151312	0.0292506	0.0661	0.090609	4.20255e-05	0.045094	0.0249407	0.00264902	0.0114439	0.044952	0.0798142	0.148802	0.0205736	0.0200774	0.00327718	0.0105713	0.0600775	0.0323608
GSM990285	47	0.0138267	0.140929	4.21133e-05	0.01068	0.00728173	0.024969	0.0817513	0.101294	0.00554547	3.37764e-05	0.0204574	0.00523876	0.1913	0.00953909	0.0862038	0.0727758	0.0242673	0.143907	0.0323358	0.0131823	0.0349882	0.00224398	0.00144861	0.00503766	0.0113883	0.0927201	0.0449879	0.0135295	0.0550821	0.00439601	0.0173212	0.0469563	0.169678	0.187125	0.0136714	0.0935111	0.0350372	0.001203	0.00682035	0.0331439	0.0598572	0.135415	0.146869	0.0534016	3.37764e-05	0.00826721	0.0822377	3.37764e-05
GSM990393	47	0.0142779	0.0989951	0.00815203	0.00294437	0.00785351	0.0213221	0.00865176	0.0753494	0.0073756	0.00267545	0.0173317	0.00334877	0.18349	0.0200146	0.0638271	0.0608076	0.038657	0.0764283	0.0440008	0.00929075	0.078535	0.00855345	0.120095	2.9872e-05	0.0094278	0.0655384	0.0589701	0.0101698	0.0353632	0.0127257	0.0136868	0.0238429	0.16679	0.176723	0.017039	0.0940879	0.00739536	2.9872e-05	0.0215484	0.0581357	0.0712365	0.130141	0.0199536	0.0215952	0.00205834	0.00372301	0.0495459	0.0327576
GSM990510	47	0.0118707	0.0990446	0.0250325	0.0111587	0.0165527	0.0180198	0.151563	0.112787	3.68816e-05	0.0455797	0.0282702	3.68816e-05	0.207037	0.0204852	0.19588	0.191503	0.0206541	0.0712132	0.0293746	0.0249262	0.0439559	0.00242153	3.68816e-05	0.00367552	0.0105505	0.178558	0.0529406	0.00686387	0.0307925	0.0103062	0.0114797	0.0764856	0.156988	0.0611145	3.68816e-05	0.104219	0.230166	3.68816e-05	0.059777	0.0401159	0.0565426	0.171963	0.205867	0.0199131	0.00610246	0.00841693	0.06584	0.00812834
GSM990515	47	0.000761672	0.0659889	5.28532e-06	0.00505143	0.00309993	0.0184338	0.00352966	0.0590483	0.0101417	5.28532e-06	0.0198373	0.00817088	0.0722629	0.0117581	0.0962797	0.0303927	0.0256161	0.042633	0.0243874	0.00135125	0.0387196	0.000646656	5.28532e-06	5.28532e-06	0.00046082	0.0417785	0.0247138	0.00346844	0.0132155	0.0155965	0.00821941	0.0137443	0.0819106	0.107939	5.28532e-06	0.0475417	0.0102403	5.28532e-06	0.00758156	0.0329552	0.0735358	0.138983	0.0116411	0.015473	0.00156978	0.0115262	0.0274372	0.0137125
GSM990520	47	0.00932737	0.106942	0.0149562	0.00720974	0.0151488	0.0182612	0.0141601	0.10019	5.02123e-05	0.027126	0.00853613	0.00605707	0.145659	0.0158691	0.149582	0.025765	0.0389408	0.138507	0.0377549	0.0193688	0.0638288	0.0134951	0.00156322	0.0146365	0.0130543	0.101405	0.0418817	0.0163427	0.0256987	0.0101287	0.0171225	0.0216778	0.190054	0.256921	0.0270229	0.162541	0.0536852	0.00152425	0.0484491	0.0342476	0.0654175	0.155388	0.0265943	0.0286398	0.000168392	0.00736435	0.0714099	0.017258
GSM989940	46	0.0119397	0.072876	0.00730767	4.18192e-05	0.0104513	0.0225173	0.000581249	0.0286356	0.0104487	0.0210356	0.0152309	0.00862192	0.0465452	0.0179627	0.0600079	0.0473086	0.0249769	0.0351587	0.0381989	0.00610306	0.0484019	0.00814704	0.0195673	0.0023743	0.00946492	0.0378823	0.0358763	0.0120374	0.0152227	0.0223379	0.0074642	0.0181917	0.0756074	0.0931202	4.18192e-05	0.0521505	0.0126622	0.000864665	0.0402821	0.0661707	0.079916	0.136894	0.0275408	0.0228908	4.18192e-05	0.00916756	0.048058	0.0437294
GSM990075	46	0.00417992	0.085769	0.00818042	0.0214859	0.00885495	0.024071	0.0252952	0.101414	0.0187815	0.0130457	0.0421128	0.0077737	0.157573	0.0219493	0.148087	0.0661941	0.0342181	0.0716973	0.0485066	0.00798284	0.0474773	0.00491654	0.00561246	0.00406768	0.00735506	0.0804337	0.0500588	0.0215972	0.0170489	0.0329563	0.0124117	0.0602607	0.0688837	0.121381	0.00923569	0.070108	0.0115869	0.000890416	0.0342572	0.0368471	0.078726	0.133537	0.0416111	0.0287849	0.00279179	0.0098199	0.0538831	0.0151218
GSM990088	46	0.0123413	0.140095	0.00320698	0.0583464	0.0223331	0.0204469	0.105811	0.165236	0.0167651	0.0112789	0.0374415	0.0125449	0.196919	0.0220595	0.150506	0.0597471	0.0283922	0.312415	0.0823869	0.0649327	0.0809038	0.021337	0.00634991	0.00968529	0.0189864	0.181703	0.0683407	0.0179941	0.0378693	0.0202467	0.0264234	0.0768675	0.268313	0.226821	0.000722313	0.170303	0.0911288	3.2073e-05	0.0543336	0.0413044	0.0742357	0.170964	0.0350338	0.0650227	0.0041424	0.0181186	0.0656992	0.0101267
GSM990278	46	0.0128009	0.11068	0.0122217	0.0025034	0.0128721	0.0133068	0.0476824	0.128204	0.00887328	0.0257818	0.0208311	0.0160699	0.162533	0.0142389	0.10288	0.057609	0.0440253	0.247374	0.0441372	0.0213306	0.0279512	0.0134286	0.0053566	0.0102689	0.00640112	0.0856596	0.0469478	0.0122577	0.018269	0.00469356	0.0184018	0.0247561	0.20838	0.16919	0.007153	0.0861175	0.0250502	0.00277488	0.0342798	0.0468915	0.0852102	0.152824	0.0489868	0.0229491	0.00582786	0.00867436	0.0767091	0.0145458
GSM990279	46	0.0638275	0.0729998	3.94762e-05	0.00261117	0.00901353	0.0217792	0.0244335	0.0528526	0.000779145	0.00146732	0.0266638	3.94762e-05	0.139259	0.0149202	0.110355	0.0689934	0.0303537	0.062546	0.0247109	0.0165286	0.0374071	0.00233139	0.00952454	0.00436644	0.00852479	0.0609923	0.0588572	0.022163	0.0121189	0.00978278	0.0210076	0.0261698	0.104465	0.114311	0.0063406	0.0694101	0.0340792	0.00273697	0.0276285	0.0587916	0.0952369	0.136403	0.0271877	0.0216772	0.00183435	0.0119909	0.044361	0.0179397
GSM990283	46	0.00815878	0.0806864	0.00659895	0.0032891	0.0152149	0.0180742	0.0151822	0.0227621	0.00812268	0.00873241	0.0111038	0.00753089	0.0727146	0.0184821	0.0667223	0.0413051	0.0172067	0.0377367	0.0245873	0.0189463	0.0730582	0.00892012	0.00153705	0.00481509	0.00643936	0.0429842	0.0287308	0.0138358	0.0144586	0.0182375	0.0162069	0.0177177	0.0542964	0.0534257	0.0180964	0.0342775	0.0108062	0.00858389	0.0225221	0.0472639	0.0560082	0.134733	0.0150263	0.012265	0.00150804	0.0104006	0.0601603	0.0161928
GSM990323	46	0.00172798	0.151649	0.00971451	0.0169743	0.0114448	0.0292343	0.0656255	0.133864	3.54742e-05	0.00912495	0.0196081	0.0178464	0.190412	0.0206203	0.158271	0.11373	0.0356446	0.171464	0.0978271	0.0427334	0.0567983	0.00693027	0.00427933	0.00578728	0.0115867	0.190856	0.0551521	0.0135775	0.0213776	0.0127053	0.00981029	0.078081	0.209161	0.241408	0.0100898	0.14886	0.0369456	0.000485105	0.0408916	0.0545591	0.077657	0.167896	0.0587148	0.0517545	0.00191144	0.00148416	0.0765167	0.0239496
GSM990350	46	0.00243377	0.0592206	0.00460087	0.0100729	0.017901	0.0245171	0.0367338	0.071207	0.00472549	0.0207525	0.0326436	0.00176999	0.123453	0.0149634	0.10221	0.0273492	0.0405799	0.0554706	0.0326338	0.0158167	0.0298611	0.000511665	0.00042147	0.012541	0.00965604	0.0640199	0.0270433	0.00995947	0.0205279	0.0108524	0.0137082	0.0195626	0.157628	0.176972	0.00684702	0.0448725	0.0539312	0.00651226	0.0243954	0.0655227	0.067124	0.136365	0.0342832	0.0219406	0.00140831	0.0061723	0.0555506	0.0131908
GSM990395	46	0.00880322	0.122463	0.00760877	0.00239213	0.00556392	0.0201385	0.0709929	0.122071	0.00239455	0.0191394	0.0407628	0.00584665	0.141025	0.0169771	0.0761064	0.0168249	0.0345446	0.135608	0.0513879	0.00120416	0.0366927	0.00606002	0.0230541	0.00458054	2.83952e-05	0.0851521	0.0540169	0.0139169	0.0125384	0.0112912	0.00357128	0.0214409	0.138769	0.199104	0.00747345	0.0674473	0.115793	2.83952e-05	0.0294086	0.0523581	0.0592665	0.185188	0.050483	0.0325914	0.00271671	0.0112829	0.0812146	0.0190858
GSM989948	45	0.00585402	0.0653088	3.46667e-05	3.46667e-05	0.0162452	0.0185947	0.0175571	0.0483374	0.0041395	3.46667e-05	0.0559965	3.46667e-05	0.0661026	0.015295	0.0667106	0.0386945	0.0241311	0.0415185	0.0292883	3.46667e-05	0.0348178	0.0136089	0.005542	0.0158178	0.0100725	0.0536388	0.0314195	0.0122042	0.0124307	0.0261863	0.00104686	0.00673725	0.052699	0.141712	0.00220879	0.0352384	0.0122928	3.46667e-05	0.0122361	0.042469	0.0709301	0.136151	0.0387291	0.0108848	0.00329951	0.0191402	0.0613595	0.0298478
GSM990091	45	0.00615149	0.0677484	0.00954729	0.000889221	0.0106883	0.0241109	0.0489461	0.0773643	0.0130355	0.0132683	0.0163684	0.0238797	0.111576	0.0294173	0.0704807	0.0305584	0.024688	0.0623732	0.0222848	0.0177373	0.038661	0.00500005	0.0175695	0.00332829	0.00664825	0.0548901	0.0419241	0.019144	0.0213323	0.0259474	0.016238	0.0310967	0.0967679	0.0722806	0.0138393	0.0464367	0.0122012	0.00860727	0.0366008	0.0435074	0.0936502	0.135329	0.0319418	0.0285506	0.00437707	0.0204869	0.0458733	0.0255013
GSM990289	45	0.00777714	0.168515	3.73174e-05	0.0146246	0.0175385	0.0266457	0.102132	0.172999	3.73174e-05	0.00279214	0.0395992	0.00571456	0.274085	0.0234419	0.107126	0.056147	0.0318518	0.194676	0.0384989	0.0435187	0.0350963	0.00037858	3.73174e-05	0.0049053	3.73174e-05	0.104308	0.0770587	0.0160952	0.0540032	0.0159877	0.0190004	0.0558135	0.224907	0.218967	3.73174e-05	0.13002	0.0557818	3.73174e-05	0.0763842	0.0495592	0.0746681	0.166296	0.056204	0.0701701	0.000775366	0.00169973	0.0817981	0.0225132
GSM990331	45	0.00834812	0.109079	0.0144866	0.0065915	0.0215082	0.0218277	0.0363996	0.0864731	0.00391257	0.01836	0.0227419	0.00526553	0.239905	0.0227476	0.156363	0.0706546	0.0321204	0.159731	0.0740474	0.0517979	0.05666	5.16909e-05	5.16909e-05	0.0165965	0.00569046	0.0985879	0.0857332	0.0218451	0.0143758	0.0156779	0.00241847	0.0461536	0.116605	0.163993	0.026656	0.131087	0.0318435	5.16909e-05	0.0793695	0.0549917	0.0679088	0.171558	0.0721179	0.0656778	0.0133502	0.0104922	0.0782629	0.0237854
GSM990355	45	0.00911143	0.126039	0.00279128	0.00752359	0.012427	0.0217076	0.0839325	0.134276	3.59685e-05	0.0148431	0.0150469	0.00570043	0.136636	0.0159979	0.099822	0.0283365	0.0278726	0.119189	0.0362316	0.0304733	0.0510356	0.00413955	0.00312849	0.000736598	0.00686516	0.103335	0.0406774	0.00871612	0.0184732	0.0110288	0.0189097	0.0296568	0.179543	0.171822	3.59685e-05	0.0865286	0.0181814	0.00225875	0.045018	0.0523559	0.0518783	0.119074	0.151733	0.0314412	0.00390616	3.59685e-05	0.0723315	0.0300179
GSM990479	45	0.00484696	0.168026	0.0185928	0.0866965	0.0164509	0.0202046	0.151512	0.122592	0.00300587	0.00685806	0.0364373	0.0115163	0.176039	0.0144919	0.130005	0.0257027	0.0283763	0.203097	0.061252	0.0287937	0.0627337	3.94202e-05	3.94202e-05	0.00587042	0.00877898	0.161722	0.0659345	0.0176861	0.0275001	0.0236025	0.0186082	0.0640276	0.134893	0.202339	0.000586528	0.140862	0.0610818	0.00437322	0.0552862	0.0432343	0.0835091	0.184354	0.0878052	0.065314	0.00266804	0.00915005	0.0526164	0.0189166
GSM990483	45	0.00755287	0.105258	0.00757452	0.00659538	0.0106537	0.0118582	0.0407905	0.0701498	0.0103715	3.94475e-05	0.00697832	3.94475e-05	0.132748	0.0131154	0.0987694	0.0149504	0.0271423	0.0541865	0.0600457	3.94475e-05	0.051507	0.00615902	3.94475e-05	3.94475e-05	0.00481329	0.0866157	0.0551772	0.0210188	0.0173998	0.0268181	0.0168002	0.0306677	0.157714	0.205851	0.00144123	0.07111	0.0186184	0.00747365	0.0503649	0.0276905	0.061138	0.130618	0.026391	0.0369591	3.94475e-05	0.00528039	0.0571472	0.00607385
GSM990503	45	3.04899e-05	0.125587	0.00893774	0.0473421	0.0148642	0.019721	0.0436752	0.136241	0.00430934	0.00394517	0.0124069	0.00325427	0.176969	0.0199957	0.141475	0.0335107	0.0299201	0.145114	0.0445458	0.014707	0.0388707	0.00901039	3.04899e-05	0.00592217	0.005816	0.138427	0.0451852	0.0142932	0.0238911	0.0131235	0.0128266	0.0325181	0.181528	0.148592	0.0122913	0.0800282	0.0324529	3.04899e-05	0.0253809	0.0345583	0.068238	0.162879	0.0363994	0.0373058	0.000701386	0.00985934	0.0779686	0.0126207
GSM990071	44	0.00777506	0.1084	0.00281215	0.0261012	0.00841171	0.0195682	0.079525	0.0566019	0.00493892	0.0185826	0.0365768	0.00591575	0.156048	0.0206343	0.18152	0.150559	0.0261296	0.12606	0.0298555	0.0364214	0.0523356	0.0108918	0.00705634	0.00435627	0.00722073	0.106116	0.0925572	0.0152044	0.0153005	0.0310619	0.025087	0.0385568	0.166293	0.202499	0.0147241	0.0952895	0.0451969	2.76278e-05	0.0296247	0.0478822	0.0624571	0.160698	0.090098	0.0344082	0.00460328	0.0135382	0.0463182	0.0239014
GSM990105	44	0.00630465	0.126869	0.00583894	0.0130213	0.0103973	0.0182556	0.100225	0.108342	0.00327338	0.0231642	0.0419816	0.00566286	0.119864	0.0103526	0.117117	0.0610338	0.0254483	0.0972319	0.0645938	0.00866635	0.0480244	0.00782619	0.0034302	0.00721225	0.0126423	0.123357	0.126625	0.0119211	0.0318225	0.0496609	0.0106762	0.0494706	0.173074	0.150136	0.0103677	0.103057	0.0369382	3.64575e-05	0.0381839	0.0435789	0.0839719	0.140906	0.0751929	0.0481819	0.00740744	0.00659754	0.0596336	0.0182057
GSM990309	44	0.0120853	0.10313	0.0133084	0.0114143	0.0125295	0.0247968	0.0756345	0.0597021	0.00582045	0.0181817	0.0120634	3.29188e-05	0.109315	0.0104052	0.0976786	0.107752	0.0245582	0.0941552	0.0382518	0.0176574	0.0299791	0.0140998	0.0537168	0.00331541	0.00404342	0.107124	0.0529233	0.0133561	0.0243497	0.0205697	0.011499	0.0701277	0.108347	0.106481	0.0273968	0.102934	0.0111593	3.29188e-05	0.0306099	0.0470305	0.0645496	0.146583	0.0916744	0.0216864	0.00827207	0.0184411	0.0663133	0.0162203
GSM990346	44	0.00852406	0.143032	0.0049902	0.0235891	0.0120812	0.0149365	0.085046	0.148698	0.00943256	4.21697e-05	0.0103843	0.00859067	0.162475	0.0236771	0.103659	0.0445308	0.0243421	0.157227	0.0537473	0.0542358	0.0409049	4.21697e-05	0.000271626	0.0148205	0.00712711	0.104088	0.0572726	0.0143841	0.0262438	0.0088334	0.0169331	0.0375937	0.160793	0.128443	4.21697e-05	0.0993219	0.0620445	4.21697e-05	0.0235388	0.0209829	0.0799378	0.140456	0.109038	0.0345033	0.00285155	0.0210365	0.0827697	0.0282624
GSM990501	44	0.00715079	0.114188	0.0196849	0.00984896	0.0141141	0.0110209	0.0156051	0.132864	0.00229868	0.0135772	0.0466258	2.4498e-05	0.142029	0.0226938	0.179549	0.0644685	0.0280278	0.163694	0.0451286	0.0341534	0.0586132	0.00385064	0.0167718	0.0131754	0.00739424	0.149421	0.0450244	0.0238871	0.0236934	0.0218889	0.0115517	0.0566265	0.171472	0.240476	2.4498e-05	0.0808515	0.034436	2.4498e-05	0.0894214	0.0317932	0.0735999	0.15666	0.174177	0.0635778	2.4498e-05	0.0139799	0.0830118	0.0236988
GSM990521	44	0.0100929	0.15765	0.0141884	0.0291795	0.0166225	0.0242269	0.0480937	0.128639	0.0109558	0.0465543	0.0682765	0.00835692	0.184112	0.0288263	0.0841016	0.12252	0.0350652	0.178268	0.0619339	0.0239331	0.0579821	0.0069166	0.00654065	0.00443148	0.00499469	0.0917214	0.064274	0.0182497	0.0181122	0.0132873	0.0222047	0.0493413	0.215123	0.193592	0.00753527	0.0889176	0.0750398	0.00253872	0.0500317	0.0395211	0.0677809	0.198605	0.044632	0.0346223	0.00947501	0.0141386	0.123229	0.00616167
GSM990529	44	0.000883351	0.110425	4.1566e-05	4.1566e-05	0.0119148	0.0305006	0.0274781	0.0348045	0.00984244	4.1566e-05	0.00469252	0.00705	0.148544	0.0282632	0.0910921	0.00705877	0.0346528	0.0904622	0.0501187	0.00505559	0.0560093	0.0108424	4.1566e-05	0.00990182	0.0119402	0.0508901	0.0305183	0.00613193	0.0175117	0.00595874	0.015627	0.0399876	0.125151	0.110454	4.1566e-05	0.0477087	0.0286969	4.1566e-05	0.0385776	0.0492542	0.0828406	0.150021	0.0118196	0.0265058	4.1566e-05	0.0118533	0.0519629	0.0248497
GSM990532	44	0.00901875	0.0502343	0.00817263	0.00649252	0.0189398	0.0279283	0.0168649	0.0661071	0.0112305	0.0280107	0.0190855	0.00872529	0.136556	0.0282719	0.117865	0.0503661	0.0352129	0.0603402	0.041979	0.0105658	0.0467867	0.0131885	0.0121001	0.030606	0.00857767	0.0535486	0.0370472	0.0241747	0.0296007	0.0450533	0.0114674	0.0263918	0.111399	0.078812	0.0143816	0.0460219	0.0294783	0.00949071	0.0286062	0.0719353	0.0954276	0.154749	0.0331563	0.017924	0.00758397	0.0188485	0.0701207	0.0400859
GSM989976	43	0.00796362	0.126017	0.00678643	0.00922924	0.0303603	0.0258254	0.0250815	0.0808838	0.00493036	4.0476e-05	0.0281794	0.0118769	0.104005	0.0159821	0.111497	0.0532641	0.0318148	0.0515539	0.0467012	0.0204171	0.0378157	0.0187888	0.0059736	0.0146505	0.00920295	0.0533508	0.037708	0.0168925	0.0193516	0.0309085	0.00760984	0.0253273	0.1111	0.167957	0.00609447	0.0574912	0.0225697	0.00521024	0.0269821	0.0486566	0.0751896	0.144062	0.0267004	0.0495325	0.0095267	0.0135318	0.0727784	0.0387521
GSM990078	43	0.00666758	0.167236	0.0182469	0.00788676	0.0158035	0.0264445	0.0279262	0.0796545	0.00271236	0.0166728	0.0409412	0.00347071	0.107411	0.024588	0.155806	0.0596487	0.0317834	0.107205	0.0397457	0.0241972	0.067289	0.00336425	0.00188231	0.0144322	0.0121144	0.164431	0.0418828	0.0153582	0.0120682	0.0397693	0.0174724	0.0483154	0.110119	0.170966	0.0150697	0.0603744	0.0165427	3.28556e-05	0.0336833	0.0352748	0.0766182	0.146612	0.0418212	0.0372927	0.00532036	0.017543	0.0628944	0.0239987
GSM990101	43	0.00552027	0.144154	0.0138208	0.00948484	0.0153407	0.0207624	0.0659823	0.103995	0.00971025	0.0149201	0.0377263	0.0310847	0.126986	0.0145626	0.0918142	0.0455685	0.0299044	0.110223	0.0428527	0.0220389	0.0462859	0.00142883	0.062807	0.0068598	0.00101519	0.159697	0.0605407	0.0158349	0.0193643	0.0324659	0.0177972	0.0649615	0.135605	0.1418	3.11527e-05	0.109952	0.019879	0.00589834	0.0177156	0.0356273	0.0834842	0.149566	0.0896007	0.0482563	0.00102879	0.00706882	0.0583394	0.0168582
GSM990269	43	0.0266371	0.155501	0.00612333	0.00832511	0.00836893	0.0230051	0.0725954	0.195517	3.24525e-05	8.68187e-05	0.0529654	3.24525e-05	0.137346	0.0192372	0.115468	0.196531	0.0182368	0.175115	0.0532266	0.0365702	0.0278164	3.24525e-05	3.24525e-05	0.000848303	0.00855041	0.089045	0.0663947	0.0138087	0.0225608	0.0228729	0.0141801	0.054773	0.21748	0.233121	3.24525e-05	0.114407	0.0529874	3.24525e-05	0.0716013	0.0547561	0.089928	0.139271	0.0716026	0.0651365	3.24525e-05	0.00996302	0.0792132	0.0161315
GSM990391	43	0.00716852	0.0748478	0.00751379	0.002757	0.0168224	0.0238702	0.0151736	0.031222	0.00426545	0.00862661	0.00579678	0.00747349	0.0798773	0.0186822	0.0677309	0.0189115	0.0273258	0.0438212	0.0206361	0.000197534	0.0249094	3.90107e-05	0.00715608	0.00285658	0.00732586	0.0431351	0.0482725	0.0164151	0.0160366	0.0179243	0.00363788	0.01867	0.0773198	0.0629899	0.00264534	0.0498709	0.0201562	3.90107e-05	0.00904091	0.0449997	0.0636435	0.133589	0.0677158	0.0225358	0.00371703	0.010465	0.047039	3.90107e-05
GSM990519	43	0.0125135	0.108891	0.0108756	0.00787618	0.0173585	0.021695	0.022836	0.0678589	0.00818507	0.0270025	0.0236506	0.00566795	0.164742	0.0266863	0.0884053	0.0438306	0.0356968	0.0612119	0.0647497	0.0247444	0.0474014	0.0076787	0.0456936	0.00527482	0.00684226	0.0733072	0.0407986	0.0147596	0.0134	0.0219705	0.0152921	0.0622068	0.0974648	0.198617	0.0172414	0.0850513	0.0186026	0.0124598	0.0564501	0.0618114	0.071618	0.16751	0.0703948	0.0247671	0.00816815	0.0133043	0.0397919	0.0251027
GSM990098	42	0.0125411	0.152958	0.0138049	0.00923562	3.28357e-05	0.0145072	0.0575196	0.0804978	0.00231979	0.0214301	0.0295046	3.28357e-05	0.13585	0.00616352	0.202506	0.08447	0.032051	0.115569	0.0389505	0.022439	0.0371342	0.00246158	0.00497666	0.00878954	0.00148704	0.10632	0.0523314	0.0160164	0.0197377	0.0279844	0.00994003	0.0695085	0.175278	0.171312	3.28357e-05	0.071275	0.06057	3.28357e-05	0.0331049	0.056188	0.0604981	0.1675	0.0682221	0.0496943	0.00895811	0.0156206	0.0676557	0.0256576
GSM990327	42	0.0141182	0.0503357	0.00266904	0.00127323	0.0129536	0.0243355	0.0248252	0.0177058	0.00708724	0.0188274	0.0100755	0.00664442	0.105887	0.0210211	0.121269	0.0214006	0.0238565	0.0560616	0.022089	0.0117161	0.0307751	0.0118875	0.00269882	3.81568e-05	0.00151802	0.0544687	0.0624634	0.0155154	0.0172838	0.0153386	0.0208419	0.0216824	0.0538342	0.0815029	3.81568e-05	0.0512832	0.0114474	0.00564307	0.0216934	0.0400175	0.0658925	0.136083	0.0249962	0.0256292	3.81568e-05	0.0166091	0.0473365	0.0240027
GSM990079	41	0.0138271	0.155158	0.0126816	0.015636	0.0152382	0.0150619	0.186602	0.0972672	0.0315913	0.0119231	0.0273099	0.0117748	0.129378	0.0277235	0.0885452	0.0856736	0.0231768	0.140443	0.0583126	0.0291673	0.0437672	3.35905e-05	0.0219981	0.0154006	3.35905e-05	0.150113	0.0457423	0.0228285	0.0343578	0.026043	0.0130567	0.0828885	0.215284	0.184986	3.35905e-05	0.151293	0.0301845	0.00653456	0.039282	0.0528887	0.0841476	0.151632	0.0627089	0.0354596	0.00195473	0.0140843	0.0773793	0.0416806
GSM990108	41	0.0194529	0.103998	0.0114459	0.00722897	0.00511244	0.0101809	0.0450488	0.133056	0.00282946	0.0348611	0.0178334	0.00928336	0.0877659	0.0171498	0.123178	0.0497567	0.0329742	0.103467	0.0305119	0.012053	0.0246947	3.39433e-05	0.0121225	0.0135146	0.0141589	0.0848879	0.0313098	0.00688989	0.0116581	0.0233398	0.0091969	0.0277008	0.0925031	0.112885	0.0237638	0.0811218	0.029846	0.00222711	0.0218797	0.061272	0.0599498	0.127748	0.0370878	0.0247226	0.0100562	0.00831769	0.0631887	0.021384
GSM990351	41	0.0143114	0.14499	0.0104581	0.028406	0.0109321	0.0238633	0.0678591	0.15881	3.19774e-05	0.0124697	0.0273441	0.0142139	0.13187	0.0162047	0.12606	0.0594864	0.0230678	0.202923	0.0555776	0.0317641	0.041274	0.0220501	0.000906021	0.00708566	0.0121771	0.185967	0.0829232	0.0131032	0.0284948	0.00267627	0.0263084	0.0479456	0.175692	0.227668	0.0129915	0.126741	0.064502	0.00783687	0.0351867	0.0460228	0.085502	0.172147	0.0967455	0.0511984	0.00179101	0.00769557	0.0779102	0.00760967
GSM990373	41	0.01052	0.0562803	0.000988091	0.00926035	4.43046e-05	0.0229577	0.0213474	0.0610031	0.00186683	4.43046e-05	0.0168325	0.0142639	0.113381	0.0209787	0.0699623	0.0155189	0.0327448	0.0641316	0.0327643	0.00375575	0.0302172	0.0110002	0.00855463	4.43046e-05	0.0049174	0.0304949	0.0252238	0.0114487	0.0127899	0.0217892	0.0116072	0.0163153	0.121627	0.119574	0.00487263	0.036633	0.0492964	0.005788	0.0135714	0.0480563	0.0664841	0.126604	0.0724858	0.0195918	0.00447996	0.00659569	0.0694234	0.00759631
GSM990476	41	0.00902534	0.0516098	0.00266613	0.00857008	0.0147903	0.0182662	0.0128494	0.0275748	0.0118387	0.0123738	0.0084207	2.67534e-05	0.106979	0.0187604	0.124364	0.0117078	0.00882789	0.106298	0.039674	0.00074152	0.0176897	0.00813216	2.67534e-05	0.0064488	0.00263692	0.0197939	0.0278574	0.00784821	0.0139306	0.00636953	0.0248084	0.0173385	0.0828712	0.0549441	0.00306547	0.0549844	0.00459847	0.00968154	0.0257764	0.0297026	0.0647357	0.125615	0.0172729	0.0137206	0.00110841	0.0148663	0.0494915	0.0121899
GSM990502	41	0.0029572	0.0903645	0.005731	0.0136602	0.0137838	0.0244183	0.0181362	0.0350949	0.0092171	0.00290077	0.0125569	0.0122234	0.107647	0.0138435	0.0440643	0.0225392	0.026234	0.0673577	0.0402933	0.0112965	0.042959	0.00118974	0.0170272	0.00238406	0.0169305	0.0788367	0.040706	0.0148402	0.0186007	0.0148213	2.10042e-05	0.0183708	0.127536	0.113877	2.10042e-05	0.0579524	0.0170138	2.10042e-05	0.0264698	0.030408	0.0773521	0.118256	0.0233748	0.02678	2.10042e-05	0.00700476	0.062221	0.0028102
GSM990077	40	0.00947832	0.100419	0.0101878	0.00476857	0.0233074	0.015087	0.0172117	0.103249	0.0122228	0.000166101	0.0116305	0.00165353	0.120558	0.0244716	0.0821578	0.0235833	0.0360945	0.18111	0.020246	0.0151606	0.0449757	0.00165949	0.00699173	0.00966005	0.00915606	0.109365	0.0328032	0.00665342	0.0220316	0.0306083	0.0122829	0.017915	0.103852	0.145793	0.0256179	0.0693661	0.0286574	0.0054217	0.0246844	0.0320682	0.0682831	0.138866	0.0348017	0.0266293	3.6186e-05	0.0118263	0.0376365	0.0387903
GSM990367	40	0.0590982	0.100589	0.0101914	0.00785981	0.0171425	0.0166841	0.0168962	0.04776	3.98968e-05	0.00893912	0.0175344	0.00354884	0.153586	0.0369082	0.0608845	0.0105224	0.0309771	0.0906133	0.0436825	0.0266766	0.0252902	0.00285684	3.98968e-05	0.00117957	0.00191703	0.069143	0.0421781	0.0157577	0.0339	0.00554564	0.00886608	0.0371759	0.178305	0.157927	3.98968e-05	0.0502837	0.00912154	0.00146435	0.026057	0.0639031	0.0694917	0.154721	0.0194631	0.0452577	0.00141019	0.00332678	0.0599028	0.00601524
GSM990540	40	0.0075224	0.0669041	0.0168178	0.0035109	0.0203104	0.0311529	0.0213553	0.0504574	0.0090084	0.0132091	0.0777422	0.015904	0.103972	0.0187551	0.0999785	0.0257035	0.0402783	0.0769835	0.0509047	0.0117477	0.0449895	0.0172074	0.00552019	0.0136418	0.0165508	0.048074	0.0334074	0.0140813	0.0193265	0.0596029	0.0189339	0.0468769	0.0557555	0.128845	0.0214569	0.0458602	0.00889594	0.00242641	0.0357068	0.0564389	0.0978964	0.138696	0.0440221	0.0224651	0.00489648	0.0119798	0.0587954	0.0601616
GSM989997	38	0.010886	0.0814871	0.00459535	0.0137041	0.0199136	0.0196416	0.0166931	0.0563446	0.00795093	0.0167401	0.0579978	0.0017229	0.125902	0.0148252	0.0905644	0.0284355	0.0263407	0.0598854	0.028978	0.0200051	0.0410237	0.00729865	0.0435509	0.0108226	0.0117733	0.0670513	0.0397125	0.0206107	0.0152147	0.021874	0.0197926	0.0267304	0.0947376	0.183638	3.82989e-05	0.0482881	0.00858891	0.00202612	0.0203515	0.0622319	0.0865928	0.14659	0.0272083	0.0291921	0.00141404	0.0106666	0.0855617	0.010313
GSM990097	38	0.00351469	0.145301	0.00140951	0.0337089	0.00851589	0.0169189	0.0568406	0.0881324	0.0085394	0.0120133	0.0255547	0.00122552	0.117209	0.0129679	0.114097	0.026382	0.0420004	0.134421	0.0608371	0.0263925	0.0638538	0.00365312	0.00801411	3.39382e-05	0.00430842	0.135267	0.0438672	0.0129597	0.0225346	0.0311436	0.0220699	0.0582139	0.188499	0.231801	0.00587504	0.0963641	0.0692511	0.00271921	0.0533711	0.0269258	0.0666339	0.155825	0.0819346	0.035156	0.00289022	0.0137131	0.083669	0.0168011
GSM990102	38	0.0179209	0.0552958	0.00107795	0.0148089	0.0128287	0.0251388	0.0521653	0.0589818	2.82859e-05	0.00225346	0.0148208	2.82859e-05	0.0999026	0.0250256	0.0759533	0.0216909	0.0346915	0.0933045	0.00912948	0.0223378	0.0297105	0.00487888	0.0170655	0.0152068	0.00863263	0.0540663	0.039684	0.016725	0.0180366	0.0208211	0.0184373	0.0329665	0.0972094	0.0891834	2.82859e-05	0.0440825	0.0118143	2.82859e-05	0.0126539	0.0582908	0.0685542	0.123739	0.0184116	0.0275459	2.82859e-05	0.0100444	0.0454632	2.82859e-05
GSM990115	38	0.00947836	0.106999	3.12194e-05	0.010016	0.0140802	0.0141542	0.0378776	0.0738701	3.12194e-05	3.12194e-05	0.0217415	0.00980485	0.148916	0.0143037	0.0657303	0.0522856	0.0230435	0.126217	0.0366616	0.0206377	0.0414434	3.12194e-05	0.00102376	3.12194e-05	0.00723452	0.0769878	0.0444703	0.00885185	0.0253495	0.0134684	0.00924659	0.0248728	0.128381	0.15454	3.12194e-05	0.0626093	0.00780242	0.0132978	0.0349948	0.0620505	0.0742158	0.139043	0.045497	0.0272736	0.000140635	0.00626712	0.049579	0.0114291
GSM990369	38	0.011133	0.138958	0.00140819	0.001859	0.00592587	0.0187819	0.0255298	0.138912	3.20993e-05	0.0107824	0.0190316	0.00743658	0.190957	0.0155495	0.0910909	0.0837047	0.0118095	0.115034	0.0472836	0.0457046	0.0514465	3.20993e-05	0.00152729	0.00581203	0.0126517	0.0643825	0.0248861	0.00967203	0.0280196	0.0100289	0.00480261	0.0316757	0.162962	0.180197	0.000838607	0.0678667	0.0337432	3.20993e-05	0.0407514	0.0355109	0.0576294	0.150929	0.0681771	0.0302119	0.00398681	0.00854089	0.069034	0.0162572
GSM990299	37	0.00969501	0.0873232	0.00943937	4.11744e-05	0.0096603	0.0136222	0.0678714	0.0747296	0.0143277	0.000993356	0.0245928	0.00822818	0.197382	0.0239076	0.118903	0.0410611	0.0298602	0.107055	0.0237988	0.0270246	0.0378257	0.00727772	0.000296894	0.00921049	0.000428859	0.0812394	0.0521584	0.0178051	0.0288194	0.00361095	0.0157188	0.0316477	0.15585	0.118339	0.00454135	0.0480691	0.0393892	0.00394044	0.0266271	0.0369998	0.0778044	0.122422	0.0187301	0.0268989	0.00696675	0.00717496	0.0371642	0.0335999
GSM990522	37	0.00996055	0.138188	0.0060484	0.0124055	0.0173666	0.0190022	0.0554768	0.107347	0.00572843	0.0212882	0.0209813	0.0105525	0.174705	0.0196682	0.114211	0.0308618	0.0236002	0.128772	0.0558465	0.0172651	0.0557837	0.0109028	0.0097693	0.015205	0.0129657	0.130231	0.0448933	0.0165603	0.0132183	0.021458	0.0216558	0.0668171	0.196652	0.235888	0.00595275	0.129963	0.0249373	0.00624895	0.0820292	0.0603866	0.0706384	0.156496	0.0658645	0.067248	0.00248085	0.0100128	0.107714	0.00456523
GSM990536	36	0.00626029	0.0555026	0.00446076	0.000114285	0.00914899	0.0149829	3.61682e-05	0.0330651	0.00463786	0.0124943	0.0253192	0.00647044	0.0872478	0.0185985	0.0511073	0.0109695	0.0248859	0.0326544	0.0126093	0.00174688	0.030425	3.61682e-05	0.0217989	0.0148341	0.00619934	0.0316085	0.0213765	3.61682e-05	0.00816883	0.00710024	0.00720773	0.00738577	0.0594656	0.0935055	0.00452886	0.027513	3.61682e-05	3.61682e-05	0.0203941	0.025344	0.0602583	0.123869	0.0250045	0.0103269	3.61682e-05	3.61682e-05	0.0572356	0.0104388
GSM990538	36	0.00955115	0.0670111	0.013193	0.010962	0.0177634	0.0198367	0.0197579	0.0663496	0.0157137	0.0202108	0.00886059	0.00948865	0.111678	0.0199314	0.0439728	0.0508584	0.0305314	0.106559	0.0701758	0.0391268	0.0718654	0.0152572	0.00603304	0.0197944	0.0168325	0.0518484	0.0473031	0.012011	0.0160774	0.0201032	0.0111655	0.0352291	0.133418	0.167142	0.0261658	0.0620506	0.00853279	0.00525042	0.045588	0.0624926	0.0766886	0.132086	0.0447561	0.0238846	4.45868e-05	0.0128107	0.071832	0.0241937
GSM990542	36	0.00404893	0.0588014	0.0082052	0.00754979	0.0082374	0.0208349	0.00952671	0.0350108	0.0214657	0.0203065	0.0348861	3.64759e-05	0.0699213	0.0196138	0.0834886	0.0649794	0.0378136	0.025952	0.0496223	0.00749197	0.0466735	0.00904783	0.0140776	0.0153508	0.0153396	0.0353701	0.0319415	0.0178172	0.0265451	0.0993928	0.00522294	0.0115608	0.0534354	0.0769808	0.00839357	0.0555501	0.00964699	0.00422613	0.0463888	0.0325319	0.0502853	0.123073	0.0170493	0.0162266	3.64759e-05	0.0121113	0.0568151	0.0291387
GSM989998	35	0.00721816	0.0932719	0.00572995	0.00509706	0.0123987	0.0203763	0.0142235	0.0544601	0.00777582	0.0130245	0.0464633	0.00687613	0.108092	0.0236632	0.126353	0.0690601	0.0220322	0.0796712	0.0696397	0.0105457	0.0332261	0.0132461	0.00419257	0.0138453	0.00397748	0.049739	0.0442667	0.0122566	0.0177249	0.0211182	0.0139028	0.0152758	0.123062	0.128924	0.0128286	0.043647	0.0213552	4.33684e-05	0.0163417	0.0328199	0.0708233	0.164063	0.0524402	0.034335	0.00371113	0.00967346	0.0644749	0.0212892
GSM989980	34	0.00734487	0.0515916	0.00810794	0.00420606	0.013038	0.0192631	0.0141064	0.0155768	0.00417721	0.00173698	0.0246519	0.00717225	0.0850145	0.0228689	0.10413	0.0295707	0.0265579	0.0330785	0.0251006	0.00640857	0.0298248	0.00770001	3.43075e-05	0.00784839	0.0107781	0.0405267	0.0294085	0.0172201	0.0212071	0.0175069	0.0172758	0.0149082	0.0632251	0.0689792	0.00698988	0.0587831	0.00878844	0.00909009	0.0321152	0.0601061	0.0610237	0.131048	0.0102984	0.0207319	3.43075e-05	0.00927786	0.0600441	0.0284323
GSM990292	34	0.00938971	0.132266	3.71796e-05	0.0269748	0.0121035	0.0208875	0.0411263	0.096929	0.00678211	0.0109149	0.0209697	0.00261718	0.159966	0.0234009	0.0701885	0.027198	0.0266175	0.104185	0.0197037	0.0246348	0.0261179	0.000833617	0.0197281	0.00436602	0.012643	0.0680938	0.0296834	0.0150982	0.0199867	0.00321705	0.00409523	0.0482997	0.145858	0.160146	3.71796e-05	0.0950191	0.0163486	0.00119463	0.0317988	0.0374417	0.0631179	0.160836	0.0289043	0.029886	0.00270543	0.0054949	0.0547351	0.0114947
GSM990507	34	0.00599872	0.095794	0.00186633	2.43671e-05	0.0043131	0.0223191	0.00574596	0.067663	0.00589187	0.00845874	0.0250043	0.00519534	0.0896733	0.0113493	0.035318	0.029216	0.0170167	0.0632613	0.0316969	0.00533101	0.0401401	0.00601313	2.43671e-05	2.43671e-05	0.00763051	0.0358121	0.0452291	0.00758677	0.0152655	0.0148011	0.0166488	0.0122928	0.0789981	0.134993	2.43671e-05	0.0558395	0.0248755	2.43671e-05	0.00561343	0.049682	0.0817818	0.140779	0.0438006	0.0192187	0.0027345	0.0194722	0.072746	0.0128619
GSM990531	34	0.00868742	0.0520462	0.0043318	0.00715325	0.0158043	0.0294287	0.00829585	0.0358901	0.0119848	0.0161878	0.0092686	0.0177031	0.0780088	0.022345	0.0378134	0.0647441	0.0385559	0.0707611	0.0292393	0.011327	0.0332064	0.0163576	0.00711744	0.00521643	0.013771	0.029335	0.0322293	0.0144285	0.00875144	0.00496059	0.0216102	0.0318529	0.0637782	0.043947	0.0174312	0.0483596	0.0113064	0.0174812	0.0465101	0.047999	0.0764958	0.136847	0.036456	0.019393	0.00601706	0.0139278	0.0507452	0.0202708
GSM989996	33	0.00515248	0.0487846	4.14484e-05	0.00239254	0.0178573	0.0205496	0.00369577	0.023835	0.00886585	0.0040475	0.0280822	0.010944	0.0807473	0.0275757	0.0958833	0.00986904	0.0275178	0.042043	0.0543056	0.0189689	0.0192244	0.00415968	0.0191888	0.0128892	0.0125557	0.0309399	0.028528	0.0122608	0.00795952	0.0300062	0.00971607	0.0205348	0.0369498	0.0757251	4.14484e-05	0.0281976	0.015445	0.00707623	0.00530612	0.0495122	0.0807554	0.139514	0.0419084	0.0105061	0.00245879	0.0135883	0.0659852	0.048888
GSM990277	33	0.00726982	0.147643	0.0136766	0.0302736	0.0071095	0.0268537	0.112962	0.15471	3.13662e-05	0.000634121	0.0244557	0.00927194	0.221298	0.0202912	0.0822902	0.109763	0.0239347	0.207528	0.0510301	0.0377467	0.0426966	0.00076218	3.13662e-05	0.00505169	0.00721191	0.124291	0.0326533	0.0176432	0.01504	0.0106812	0.0129603	0.0487795	0.168343	0.244355	0.0111102	0.107675	0.115275	0.0040337	0.036402	0.0478367	0.0677521	0.188448	0.0652045	0.0599602	0.00356645	0.0125195	0.0892453	0.00231049
GSM990490	33	0.00652063	0.10569	0.00941659	0.00978314	0.0171719	0.0178828	0.030049	0.0478175	0.00137638	0.00645575	0.0245015	0.00213982	0.138801	0.0219221	0.0971062	0.0402156	0.0248183	0.0749733	0.0571023	0.0138342	0.0318113	0.00936512	4.41662e-05	0.00261644	4.41662e-05	0.0764097	0.049084	0.00537535	0.0121109	0.0508953	0.0101106	0.0346807	0.132154	0.0989232	4.41662e-05	0.0465859	0.0130488	4.41662e-05	0.043819	0.0399904	0.071209	0.188298	0.0622125	0.0333689	5.90321e-05	0.0118775	0.0652233	0.00949394
GSM989983	32	0.00850068	0.0941014	0.0116322	0.00692477	0.0214124	0.0225107	0.0262329	0.0867777	0.00142109	0.00393689	0.0166095	3.87611e-05	0.170424	0.0103356	0.0886011	0.0330052	0.0371809	0.060062	0.0547652	0.0211961	0.0578575	0.010835	0.0072443	0.0156154	0.00533381	0.0699189	0.0471661	0.014049	0.0330221	0.0195604	0.0205121	0.0321453	0.150271	0.185141	0.00315611	0.0639959	0.0116863	0.00260028	0.0234586	0.0492357	0.0819937	0.159983	0.0496612	0.0221979	3.87611e-05	0.0143769	0.0711568	0.0372729
GSM990517	32	0.00617921	0.0723362	0.0016265	0.0053996	0.0140029	0.0232163	4.16101e-05	0.0505489	4.16101e-05	4.16101e-05	0.00965096	0.0038167	0.0857039	0.00972476	0.0704985	0.0324984	0.0303425	0.0540625	0.0246593	0.0114024	0.0430547	0.00528887	4.16101e-05	0.00158448	0.00439849	0.0567623	0.0227636	0.00476021	0.00353967	0.00841841	0.0117306	0.0221152	0.109161	0.10532	0.0109195	0.0581491	0.0302564	4.16101e-05	0.0164785	0.0684695	0.0765469	0.13105	0.0249802	0.0144567	0.000678683	0.0130421	0.0404199	0.0132126
GSM990324	31	0.0114393	0.153237	0.0160053	0.0159041	0.0042213	0.0200141	0.0975604	0.0950444	0.00967256	0.0255126	0.0239378	0.00557004	0.128075	0.0211758	0.102784	0.0409521	0.0376376	0.160569	0.00363797	0.0271467	0.0307557	0.00721979	0.0263385	0.00609148	0.0143315	0.118036	0.0382734	0.0090601	0.0210107	0.00351981	0.0211398	0.027592	0.0921607	0.162895	0.0145631	0.0733988	0.0171645	0.00346059	0.0363004	0.0389019	0.0751431	0.163796	0.0179189	0.0279803	0.00589697	0.00455175	0.0638775	0.0124313
GSM989992	30	0.0230781	0.0930199	4.54224e-05	0.00870935	0.0205342	0.0268929	0.0348979	0.100247	0.00531136	0.0305649	0.0506386	0.00532238	0.16114	0.0202364	0.0964904	0.0824261	0.0228867	0.117074	0.0681371	0.0250169	0.0640095	0.0131185	0.0405368	0.0143871	4.54224e-05	0.0822025	0.0602905	0.0164251	0.0293607	0.0300142	0.0149411	0.0483314	0.197378	0.252579	0.0112117	0.0799261	0.0609632	4.54224e-05	0.0277978	0.0639379	0.0771194	0.153298	0.0826213	0.0493511	0.00497382	0.0136397	0.0819907	0.0399048
GSM990534	30	0.0150644	0.064956	0.0118504	3.55281e-05	0.00737018	0.0270046	0.0244434	0.0648229	0.00947791	0.00318661	0.0161757	0.0143001	0.105209	0.0241151	0.0925972	0.0443112	0.0202374	0.0500655	0.0272986	3.55281e-05	0.0340547	0.00171729	0.0100726	0.0121801	0.00896139	0.0703708	0.0209135	0.0188036	0.0138434	0.0255778	0.0153792	0.0206261	0.0547201	0.096061	3.55281e-05	0.0436868	0.0218973	0.00170317	0.036541	0.0420556	0.0912895	0.149761	0.036552	0.0289757	0.00358637	0.00741314	0.0568493	0.0268235
GSM990500	29	0.0126197	0.0646336	0.00709319	0.00575156	0.0113552	0.0212547	0.0198901	0.0395496	0.0079154	0.000225661	0.023024	0.00337397	0.0961488	0.026695	0.10724	0.0268155	0.0349544	0.0851982	0.0292625	2.44879e-05	0.0279713	0.00515875	0.000618435	0.00568252	0.00267036	0.041296	0.0391206	0.00952719	0.0163671	0.0098764	0.0215233	0.0149691	0.0584473	0.0650452	0.00792734	0.0353643	0.014428	0.00183564	0.0109595	0.0452218	0.0772847	0.14327	0.0357948	0.0147755	2.44879e-05	0.00848413	0.0455517	0.0173014
GSM989987	28	0.00617995	0.0766585	0.00308284	0.020271	0.0201939	0.0308009	0.0416819	0.0289561	0.00485471	3.96954e-05	0.048395	0.00174179	0.100022	0.0216193	0.094048	0.0259081	0.0280167	0.0724915	0.0373829	0.00582663	0.0240813	0.0123217	0.00189311	0.00701195	0.00415342	0.0350033	0.0298308	0.012141	0.0102576	0.0197657	0.0212787	0.0168162	0.0613116	0.129028	0.00959327	0.0465723	0.0121076	3.96954e-05	0.0295575	0.0344236	0.0785865	0.1401	0.0468215	0.0168475	3.96954e-05	0.00900908	0.0561908	0.0307232
GSM990525	28	0.00773085	0.133066	0.00404634	0.0092728	0.0130059	0.0198934	0.0168912	0.067541	0.00838943	0.0032796	0.0214897	0.00638922	0.140828	0.0206209	0.100934	0.0171106	0.0292478	0.12044	0.051266	0.0179855	0.0319702	0.0126048	0.00736638	0.0123058	0.00631899	0.0665164	0.047022	0.011264	0.0236506	0.0192855	0.0157407	0.0316	0.114638	0.161325	0.0138356	0.049279	0.0217175	0.00749129	0.0353038	0.0466442	0.0730896	0.160832	0.0420172	0.036063	0.00542813	0.0162869	0.075926	0.0153314
GSM990499	27	0.0218593	0.151422	0.00578135	0.0426154	0.0133248	0.0183716	0.0192306	0.152182	0.00255583	0.0161393	0.0383986	0.00744189	0.17582	0.016082	0.0933659	0.0248706	0.0300657	0.201513	0.0823991	0.0373522	0.0532516	0.0082046	0.00307095	0.00940524	0.00832375	0.129778	0.0783363	0.0143254	0.0208561	0.0221356	0.0155762	0.045732	0.226404	0.229668	0.00854363	0.13678	0.0422685	0.00170469	0.0819075	0.0557309	0.0773061	0.173191	0.071508	0.0497503	2.97627e-05	0.00621567	0.114937	0.0116768
GSM990504	27	0.00596666	0.14784	3.05213e-05	0.00674739	0.00963643	0.019075	0.0113887	0.0669001	0.00154984	0.000577397	0.0405572	0.0014964	0.153819	0.0173511	0.0383588	0.0229282	0.0229377	0.108087	0.0477521	3.05213e-05	0.032714	0.00373251	0.00134013	3.05213e-05	0.00439926	0.0675282	0.0444895	0.00239556	0.0292164	0.0172112	0.00816353	0.0284919	0.146169	0.0620443	3.05213e-05	0.0636874	0.0226824	3.05213e-05	0.0255548	0.0315644	0.0778291	0.154923	0.0639313	0.0191114	3.05213e-05	0.0103394	0.044332	0.0163965
GSM990523	27	0.0101922	0.125053	0.00476587	0.0319055	0.0102933	0.0240535	0.0454687	0.101	0.0113945	0.0187083	0.0167513	0.00840192	0.197502	0.011809	0.083503	0.0472905	0.0274941	0.11392	0.0642632	0.0150587	0.0557774	0.00568706	0.00224664	0.0140603	0.00817471	0.150589	0.0518299	0.0154951	0.0227507	0.0145765	0.0141575	0.0493227	0.190081	0.248835	0.0143836	0.115327	0.0188648	0.00556026	0.0558305	0.0388168	0.0537666	0.15971	0.0307132	0.0365224	0.00310942	0.00765614	0.123343	0.023206
GSM990375	26	0.0147529	0.0835355	0.00110921	3.14187e-05	0.0129242	0.0209522	0.045497	0.0641738	0.00793507	3.14187e-05	0.0173453	0.00412163	0.108117	0.0232254	0.0597885	0.0344788	0.0284586	0.0968454	0.0308665	0.00975678	0.0265527	3.14187e-05	0.0232139	3.14187e-05	0.00821704	0.074962	0.0548805	0.024798	0.012312	0.015162	0.0190666	0.0125318	0.121472	0.0727471	3.14187e-05	0.0274637	0.0091386	0.00263172	0.0211874	0.0504817	0.0789253	0.16425	0.0315877	0.0223461	0.00365529	0.00863162	0.065629	0.00625922
GSM990537	25	0.0112623	0.0454077	0.00920229	0.00438575	0.012626	0.0312937	0.0376528	0.0358811	0.0130806	0.0203985	0.0329383	0.00467552	0.09298	0.0236315	0.0661717	0.024129	0.0321029	0.069421	0.047636	0.00875141	0.0430494	0.0187812	5.44168e-05	0.0189034	0.0209902	0.0355282	0.0308872	0.0166055	0.0196121	0.0325804	0.0147719	0.0136119	0.0712615	0.0681257	0.0114603	0.0547143	0.0152669	0.00472427	0.0446838	0.0626113	0.0784204	0.140212	0.0287315	0.0355836	0.0183328	0.0108442	0.0625275	0.0343421
GSM990518	23	0.0153513	0.0335246	0.0111484	0.00306018	0.0106528	0.0218829	0.00749701	0.0161717	0.00855316	0.0112937	0.0108273	0.0152788	0.0828736	0.0193632	0.0497233	0.0287926	0.0197878	0.0173817	0.023337	0.0154299	0.0312571	0.00875939	2.74114e-05	0.0043686	0.00456399	0.0439001	0.0375521	0.00975753	0.0195034	0.0198185	0.0331653	0.00561453	0.0646502	0.127963	0.0101044	0.0400326	0.00381567	0.00103871	2.74114e-05	0.0443393	0.0834884	0.133802	0.010126	0.0122936	0.00275923	0.0101761	0.023308	0.00906842
GSM990541	22	0.0120955	0.0947288	0.0172238	0.0144653	0.0191596	0.0353375	0.0314925	0.0410415	0.0158459	0.0232714	0.0480268	4.48698e-05	0.123135	0.0241171	0.0824499	0.0452014	0.0294706	0.0613624	0.054219	0.0128511	0.0305113	0.0157479	0.00285976	0.0209052	0.0173924	0.0435234	0.0352501	0.0127418	0.01831	0.0256197	0.0186043	0.0386318	0.0558419	0.14668	0.0133871	0.0448706	0.019012	0.00867057	0.0343086	0.0526731	0.0931251	0.132154	0.0535312	0.0170216	0.00227501	0.00980457	0.0632172	0.0443942
GSM990539	21	0.00134286	0.0437209	0.00108658	0.00183258	0.0140497	0.0268216	0.0101267	0.0221686	0.0223198	0.00786828	0.0239936	0.00071723	0.090299	0.0183724	0.0224105	0.0470873	0.0298551	0.0373592	0.0415639	0.00152245	0.0405921	0.0222274	0.00210273	0.0254502	0.0131491	0.0539133	0.0234832	0.0179571	0.00928827	0.0231764	0.00385642	0.0118807	0.0537741	0.0803201	0.00586129	0.0421219	0.00743681	0.00620449	0.0390389	0.0793098	0.0875864	0.162411	0.0260644	0.00615762	0.00404558	0.00825462	0.0418988	0.0350556
GSM990528	19	0.0112707	0.0404595	0.000511413	0.000667861	0.0157145	0.0315419	0.00295526	0.0350878	0.00960635	4.37969e-05	0.0162574	0.00972989	0.107369	0.0206962	0.0750044	0.0196726	0.0221573	0.0258394	0.0322195	0.0194208	0.040115	0.00113966	0.00496809	0.0107468	0.0147331	0.0120137	0.0168159	0.0177112	0.0218178	0.0127454	0.0125865	0.00816572	0.0467041	0.0631263	0.000160222	0.0459977	0.00364475	4.37969e-05	0.0364626	0.0471607	0.0869833	0.121757	0.00944014	0.023366	0.00323977	0.022997	0.0630387	0.0175161
Johansson	Age	cg23062112	cg07365816	cg08659394	cg14575559	cg18560328	cg21229268	cg23091824	cg03865257	cg11250773	cg12892303	cg12781700	cg13583934	cg12065366	cg25203031	cg17404915	cg22299454	cg05404701	cg24010885	cg17712694	cg20707222	cg11297107	cg12799781	cg01718742	cg10263370	cg15774465	cg16491617	cg11832210	cg07686635	cg26510017	cg15745900	cg15402399	cg06963053	cg05009934	cg10094616	cg06010588	cg23847712	cg17370163	cg13428480	cg22620221	cg22319311	cg16437728	cg25984671	cg07882671	cg04342955	cg15759616	cg07624639	cg14482313	cg14537533
GSM2334366_7512560092_R05C02	94	0.336081	0.0148665	0.0270716	0.032016	0.211416	0.205616	0.0624907	0.0647621	0.331258	0.285776	0.186488	0.0522811	0.260558	0.106072	0.0375946	0.107723	0.0559835	0.0150638	0.299268	0.105684	0.0474559	0.12787	0.298888	0.361008	0.0671714	0.231544	0.0579516	0.125882	0.178655	0.14619	0.0991321	0.0241204	0.191807	0.156028	0.414291	0.388742	0.408022	0.115118	0.390309	0.160094	0.305758	0.259803	0.126648	0.132533	0.0226672	0.0575024	0.130974	0.103404
GSM2333951_9370847092_R02C01	91	0.194983	0.0243454	0.0192264	0.0435841	0.0786414	0.101253	0.0757013	0.0272405	0.227415	0.224444	0.0832743	0.0465918	0.14981	0.0853209	0.046832	0.0720943	0.0382047	0.0181449	0.121855	0.0754864	0.036658	0.0695184	0.243345	0.302081	0.0355071	0.179083	0.0442508	0.101587	0.176803	0.174282	0.0948645	0.0268317	0.122348	0.112633	0.3271	0.33908	0.347782	0.0811986	0.293431	0.124157	0.0769465	0.144066	0.0683649	0.107808	0.0226958	0.0598901	0.189681	0.170436
GSM2334574_7766148098_R06C01	91	0.0877693	0.0128388	0.00958437	0.0234164	0.0340314	0.0536427	0.0460515	0.0130203	0.122358	0.275595	0.146144	0.0387597	0.0576038	0.0644394	0.0230945	0.0659136	0.0175326	0.0166256	0.104071	0.0370345	0.0183951	0.0580986	0.0861213	0.119187	0.0277419	0.0906456	0.0160387	0.0755687	0.111863	0.0342956	0.0218518	0.0147443	0.063303	0.038282	0.283736	0.146747	0.252764	0.0485406	0.195431	0.0785598	0.0749346	0.0855399	0.0403198	0.0668076	0.0191352	0.0199955	0.107182	0.0677688
GSM2334530_9376561056_R05C01	88	0.068738	0.0219648	0.0118971	0.0189104	0.120288	0.0763203	0.104475	0.0159883	0.172445	0.21745	0.0709102	0.0466362	0.104494	0.0521114	0.0407403	0.118529	0.0168224	0.0202024	0.0702459	0.0372705	0.017998	0.0545713	0.111372	0.116732	0.0976827	0.0701579	0.0290331	0.0830378	0.149356	0.0385415	0.0442954	0.0379354	0.0489491	0.0484827	0.25406	0.22953	0.206701	0.0535098	0.114006	0.0843065	0.0737288	0.100915	0.0645804	0.0595344	0.0253817	0.051989	0.110592	0.12888
GSM2334519_9376561048_R06C01	87	0.203731	0.128429	0.033925	0.0290055	0.129502	0.149393	0.18278	0.0212928	0.215979	0.234995	0.118649	0.0448801	0.30078	0.14932	0.0752782	0.216047	0.0432826	0.0221274	0.449583	0.115018	0.072376	0.134414	0.269471	0.227418	0.107088	0.189111	0.142494	0.181336	0.159189	0.169288	0.0792662	0.0476296	0.153316	0.204475	0.478833	0.414788	0.432026	0.104165	0.413913	0.171536	0.159156	0.238071	0.0751365	0.132207	0.0227163	0.0637909	0.231642	0.115996
GSM2334588_7766148103_R03C02	87	0.0990204	0.0139782	0.0203388	0.0439333	0.0452767	0.0669181	0.0631396	0.0368194	0.0901268	0.197311	0.111899	0.050177	0.0572376	0.0534748	0.0289066	0.113825	0.0276851	0.0182331	0.10762	0.0416103	0.0223844	0.0832545	0.179173	0.235745	0.0545824	0.120856	0.0157782	0.100879	0.158884	0.0814087	0.0397274	0.0273944	0.0750455	0.1054	0.133701	0.42945	0.141741	0.0740601	0.207301	0.139437	0.192816	0.116576	0.114015	0.170515	0.0177591	0.0442801	0.168265	0.0964161
GSM2333904_7766148077_R04C02	86	0.144848	0.0209484	0.00819969	0.026528	0.102549	0.149818	0.0516755	0.0357781	0.170992	0.318781	0.103098	0.0330186	0.113306	0.0582828	0.0204839	0.0754997	0.0292263	0.0193985	0.19093	0.0763538	0.0316691	0.0489922	0.205081	0.239809	0.0265108	0.12173	0.0536788	0.0572396	0.171398	0.0669218	0.0476159	0.0262257	0.103715	0.123935	0.372286	0.29856	0.293768	0.057522	0.329446	0.108881	0.135032	0.136546	0.0749886	0.0846507	0.0166863	0.142148	0.165885	0.100116
GSM2333911_7766148077_R03C02	86	0.220914	0.0195788	0.015884	0.0214192	0.262939	0.106369	0.0570454	0.0695618	0.203269	0.291739	0.113258	0.041631	0.299133	0.101687	0.0500156	0.0912897	0.0282767	0.0259847	0.258137	0.0748385	0.0330466	0.0864713	0.294109	0.257207	0.0489916	0.263087	0.052911	0.106803	0.206902	0.137226	0.0863038	0.0231435	0.19797	0.16502	0.398703	0.357341	0.381137	0.105298	0.361829	0.179135	0.268416	0.193691	0.114634	0.171994	0.0165187	0.0699918	0.130069	0.153917
GSM2334085_9376561015_R01C02	86	0.163348	0.0136568	0.0138086	0.0240784	0.0925602	0.0923091	0.0984706	0.0376876	0.162863	0.146791	0.0662806	0.0634512	0.158111	0.0608535	0.0368866	0.154177	0.105282	0.0202499	0.15454	0.101343	0.0480184	0.0991568	0.247663	0.30353	0.0810664	0.152446	0.0456014	0.0876412	0.179825	0.0695676	0.0681573	0.0224681	0.0941368	0.111245	0.436181	0.335427	0.388371	0.0715823	0.251048	0.195996	0.140022	0.183761	0.0584668	0.0718395	0.0275603	0.0395813	0.133783	0.134086
GSM2334620_7512551003_R02C01	86	0.185262	0.0121206	0.0301185	0.0333978	0.0892144	0.0973993	0.0587165	0.0232138	0.210547	0.246391	0.17027	0.0458338	0.200756	0.0607012	0.0306965	0.0639283	0.0238432	0.0193155	0.107905	0.0974532	0.0261208	0.0718623	0.207761	0.218755	0.0721221	0.127324	0.0389012	0.0577244	0.145435	0.106672	0.0332306	0.0248361	0.108177	0.125038	0.354001	0.313665	0.409814	0.0878233	0.253417	0.137079	0.171685	0.217628	0.0720721	0.102084	0.0197076	0.030705	0.144496	0.117758
GSM2334380_9370847124_R01C01	85	0.154875	0.0164692	0.023685	0.0288697	0.0893945	0.0950704	0.0901708	0.0279589	0.167563	0.279977	0.0996522	0.0335993	0.122743	0.0453055	0.0393403	0.0794196	0.0712727	0.0240675	0.234646	0.063528	0.014736	0.0679159	0.199838	0.262729	0.0419753	0.133339	0.0790897	0.100635	0.213271	0.0343636	0.0663543	0.0523007	0.122836	0.0637035	0.399447	0.284675	0.24338	0.078024	0.339216	0.1432	0.0750013	0.175201	0.0763269	0.108345	0.0345059	0.047004	0.152749	0.141986
GSM2334547_7766148053_R04C01	85	0.16242	0.0226353	0.0508739	0.0257767	0.0963569	0.0767657	0.0677992	0.0252947	0.183434	0.24518	0.153314	0.032867	0.148681	0.0886338	0.0327012	0.116225	0.027459	0.0204057	0.26875	0.111048	0.0441303	0.055957	0.239037	0.279187	0.0407967	0.146311	0.041136	0.0892445	0.143516	0.0737477	0.081136	0.0365681	0.129025	0.0921507	0.309648	0.301998	0.321552	0.0671778	0.29419	0.138609	0.0806907	0.164005	0.0864884	0.103437	0.0188172	0.0588289	0.144867	0.11249
GSM2334095_9370847015_R03C01	84	0.248114	0.0188447	0.0765138	0.0358419	0.233447	0.195051	0.112005	0.104269	0.22619	0.218164	0.143009	0.0777722	0.316646	0.09021	0.0606114	0.147395	0.0161827	0.0165466	0.245896	0.102596	0.0494058	0.105573	0.228547	0.305791	0.0362548	0.230804	0.0314454	0.111186	0.229764	0.18051	0.110975	0.0239535	0.116023	0.185118	0.421254	0.42305	0.435739	0.100612	0.367557	0.101515	0.282223	0.256088	0.105249	0.118827	0.0264945	0.0757938	0.20293	0.158032
GSM2334510_7766148131_R06C02	84	0.24433	0.0436554	0.0288206	0.0368565	0.364173	0.3531	0.2374	0.0808578	0.324426	0.296019	0.218496	0.174289	0.316522	0.0904627	0.169291	0.199287	0.0391117	0.0247582	0.611325	0.38118	0.0510238	0.070067	0.35624	0.408916	0.0848636	0.395503	0.147432	0.146079	0.370462	0.370304	0.190372	0.0268779	0.268854	0.187674	0.629543	0.464271	0.490918	0.0990328	0.490022	0.215459	0.263058	0.406857	0.297633	0.298411	0.0199296	0.0645065	0.348645	0.413402
GSM2334613_7766148103_R01C02	84	0.185798	0.0244346	0.0133058	0.0333568	0.0943105	0.0844829	0.127994	0.0212441	0.138866	0.132786	0.153034	0.0520131	0.154146	0.0856623	0.0416098	0.0757221	0.0330601	0.0193108	0.276682	0.0652506	0.0155574	0.100817	0.205262	0.247571	0.0633937	0.178005	0.0358196	0.108717	0.164027	0.0929881	0.0302055	0.0321693	0.134931	0.118349	0.330817	0.229072	0.364824	0.0716842	0.283396	0.0720205	0.0757211	0.210824	0.0467208	0.102494	0.0180392	0.061044	0.175998	0.177759
GSM2334090_9370847015_R05C01	83	0.167854	0.0361108	0.0148747	0.0322048	0.127052	0.116488	0.0918095	0.0474723	0.245924	0.222655	0.078763	0.0677762	0.108403	0.059199	0.061942	0.0935313	0.0245486	0.0116469	0.171667	0.056022	0.0259541	0.0626343	0.191054	0.227963	0.0591265	0.115264	0.0627207	0.0509358	0.183258	0.0658558	0.0701596	0.0228206	0.103893	0.123271	0.33581	0.400221	0.336232	0.0795825	0.269481	0.189638	0.112393	0.144719	0.0613512	0.134741	0.0197024	0.0692369	0.237827	0.253854
GSM2334093_7766148058_R06C02	83	0.156306	0.0290741	0.0626762	0.0272769	0.110993	0.142687	0.0818422	0.027131	0.273332	0.159077	0.155535	0.0453062	0.271964	0.0705073	0.0489838	0.0960463	0.0195344	0.018101	0.227752	0.0972989	0.0284539	0.0770789	0.309376	0.37333	0.0438053	0.1729	0.044336	0.146476	0.171193	0.0965963	0.114062	0.0265856	0.125323	0.119738	0.391098	0.387941	0.347559	0.0849513	0.336329	0.144375	0.11395	0.320291	0.197302	0.114266	0.0236422	0.0532173	0.214279	0.204803
GSM2334323_7512560137_R01C02	83	0.172648	0.00950446	0.0166216	0.0243563	0.0602536	0.0839433	0.0447863	0.0278882	0.187061	0.213604	0.074474	0.0464409	0.162991	0.061768	0.0331601	0.0679656	0.0251637	0.00911231	0.129996	0.0741415	0.0326388	0.0355193	0.189119	0.181587	0.0461067	0.0828766	0.0360416	0.0561847	0.145061	0.0907315	0.0679837	0.0288159	0.104766	0.10875	0.256818	0.336239	0.237318	0.0523489	0.269254	0.0952528	0.149725	0.121228	0.0705319	0.116523	0.0173297	0.0356176	0.0873452	0.0942076
GSM2334516_9376561056_R06C02	83	0.148568	0.0313116	0.0419543	0.0217359	0.0945427	0.107084	0.132345	0.0703316	0.157129	0.281858	0.199296	0.0511694	0.168892	0.0787328	0.0664257	0.0828964	0.0545891	0.0259719	0.207455	0.0368091	0.0412946	0.10212	0.275003	0.223389	0.0830923	0.145279	0.03691	0.150569	0.164831	0.103065	0.060589	0.0324634	0.123644	0.13297	0.471381	0.465358	0.32674	0.055694	0.295437	0.169935	0.147397	0.225209	0.09599	0.136773	0.0186266	0.0583133	0.17174	0.151344
GSM2334543_7766148053_R03C01	83	0.320152	0.0344813	0.139972	0.0253119	0.3974	0.176135	0.0770483	0.0596895	0.39922	0.334998	0.23435	0.0371976	0.336112	0.172601	0.0328742	0.164693	0.0391282	0.0179692	0.29344	0.100873	0.049519	0.176479	0.403213	0.442803	0.091475	0.378923	0.144947	0.239926	0.237649	0.282936	0.137533	0.0349356	0.248002	0.294053	0.428136	0.483267	0.399749	0.243017	0.456044	0.199788	0.43267	0.236942	0.183378	0.218425	0.0208236	0.0902758	0.224652	0.209484
GSM2333935_7766148114_R02C01	82	0.250864	0.0198804	0.0315352	0.0380915	0.0297246	0.0877776	0.0841016	0.0459354	0.188509	0.426782	0.102808	0.0586251	0.141552	0.0759594	0.042623	0.106052	0.0312108	0.0213632	0.20082	0.0705453	0.0333514	0.0800419	0.273567	0.233444	0.0443648	0.173481	0.0585713	0.0984071	0.158735	0.0708982	0.0672489	0.0164414	0.117653	0.0736427	0.342475	0.256532	0.306314	0.0755816	0.306309	0.157908	0.108103	0.154834	0.0927313	0.123094	0.0265877	0.0650567	0.137919	0.113102
GSM2333966_9376538120_R05C01	82	0.0723106	0.0206033	0.0271399	0.0315101	0.0715776	0.0738473	0.121073	0.0238239	0.243191	0.165203	0.0864622	0.037162	0.0837617	0.034844	0.0498496	0.0961404	0.0316427	0.0216837	0.110807	0.0502411	0.0255266	0.0368381	0.17742	0.119863	0.0404486	0.0917889	0.0279675	0.0650422	0.172762	0.0401626	0.0465985	0.0331976	0.0885822	0.0528754	0.268392	0.213826	0.28483	0.0508903	0.158882	0.123738	0.0900743	0.152517	0.0472973	0.0618717	0.0262747	0.0332314	0.102964	0.0640903
GSM2333991_9370847011_R05C02	82	0.232579	0.0266724	0.0383573	0.036338	0.291217	0.19984	0.103257	0.0592729	0.230517	0.266266	0.304518	0.0515288	0.287119	0.11843	0.0813591	0.159672	0.0487347	0.0202993	0.319826	0.0649404	0.0665195	0.142793	0.30382	0.343029	0.0652775	0.289677	0.130584	0.189299	0.26452	0.205252	0.164105	0.0166263	0.192826	0.237606	0.495634	0.434958	0.453426	0.153032	0.39483	0.234944	0.30683	0.276228	0.128951	0.224651	0.0238047	0.0611388	0.208709	0.291742
GSM2334334_9379082134_R01C01	82	0.172949	0.0243902	0.0216207	0.0315329	0.0381059	0.108733	0.0513743	0.0440474	0.160551	0.347333	0.193866	0.0649957	0.0753859	0.0826	0.0416379	0.0852154	0.036222	0.00644431	0.17289	0.0535749	0.0347084	0.0764633	0.136891	0.303199	0.0314812	0.218	0.0666207	0.115493	0.152448	0.0734146	0.0721401	0.0734325	0.0863547	0.063391	0.228124	0.423022	0.232891	0.114053	0.198261	0.0913264	0.0856046	0.0999527	0.082093	0.200395	0.0236045	0.0354265	0.170411	0.123368
GSM2334581_7766148122_R02C01	82	0.224874	0.0191629	0.0353807	0.0233597	0.131261	0.157715	0.0472318	0.0362432	0.238357	0.270857	0.0989676	0.0462911	0.242472	0.0781211	0.0373298	0.0968012	0.0222643	0.0186089	0.27631	0.0875302	0.0409399	0.0890703	0.273595	0.304777	0.0353252	0.192821	0.122469	0.105303	0.195468	0.137549	0.0695848	0.0283334	0.115914	0.152388	0.405356	0.435827	0.429443	0.0855058	0.349049	0.203438	0.195163	0.19521	0.112354	0.131753	0.0169884	0.0457452	0.154942	0.128819
GSM2333949_9370847092_R01C01	81	0.184018	0.0243088	0.063828	0.0356948	0.0278332	0.194258	0.0980438	0.0434084	0.152754	0.287382	0.275435	0.0544441	0.189624	0.104534	0.150969	0.132792	0.0297664	0.0245521	0.192257	0.0570704	0.0467282	0.170567	0.201554	0.278088	0.130085	0.169642	0.074673	0.228454	0.313506	0.148903	0.0635705	0.0300087	0.188344	0.146303	0.418937	0.289224	0.448868	0.0830419	0.330086	0.102544	0.0866399	0.305405	0.0894154	0.208743	0.0335154	0.120574	0.107023	0.0933197
GSM2333950_9370847125_R06C02	81	0.291888	0.0292138	0.107413	0.0462736	0.280768	0.188898	0.105782	0.122151	0.315692	0.319811	0.198065	0.0412296	0.355402	0.174608	0.11735	0.266445	0.0937327	0.0310938	0.464142	0.267915	0.0653445	0.22736	0.329472	0.407322	0.10259	0.259617	0.1984	0.246449	0.255203	0.327181	0.163283	0.0489338	0.218258	0.195263	0.504789	0.518005	0.483667	0.188296	0.505113	0.181044	0.254496	0.316656	0.283268	0.185921	0.028001	0.188536	0.168338	0.199169
GSM2333979_9370847125_R03C01	81	0.154758	0.0299508	0.0314434	0.0280862	0.105411	0.0822768	0.0797881	0.0353651	0.20552	0.267903	0.1735	0.0535459	0.180936	0.0569307	0.0403164	0.076647	0.0385045	0.0183364	0.28631	0.0649468	0.0326972	0.093302	0.21663	0.209468	0.0250094	0.156559	0.038244	0.0924102	0.187057	0.0600289	0.0643718	0.0283447	0.101155	0.0998031	0.430627	0.39235	0.261327	0.0810134	0.202763	0.118005	0.0779695	0.187889	0.0753492	0.150777	0.027902	0.0700092	0.24908	0.17336
GSM2334101_9370847015_R02C02	81	0.176091	0.0197694	0.0266984	0.0389469	0.0886312	0.172437	0.0676466	0.0263449	0.249046	0.282119	0.158412	0.0536322	0.136967	0.0667365	0.0431733	0.0777926	0.0555508	0.0197738	0.152984	0.115151	0.0485688	0.0467181	0.200273	0.256605	0.07034	0.128031	0.0916104	0.104941	0.17897	0.0850082	0.0708516	0.0287477	0.0968542	0.10635	0.397545	0.306613	0.311938	0.0724038	0.285039	0.153601	0.123941	0.21777	0.0972179	0.132982	0.02588	0.0470472	0.171481	0.184297
GSM2334228_9379082101_R06C01	81	0.1389	0.0667418	0.0993917	0.0304934	0.321614	0.178737	0.112121	0.106151	0.228436	0.285456	0.159433	0.0561237	0.294652	0.0567811	0.109761	0.0880894	0.1994	0.0254196	0.193694	0.243119	0.0342007	0.101837	0.112867	0.28336	0.056885	0.115913	0.157638	0.0910732	0.157466	0.196078	0.063053	0.039399	0.123804	0.158941	0.369175	0.396109	0.337353	0.186117	0.25783	0.175423	0.207221	0.119251	0.384878	0.231571	0.027815	0.0969686	0.159244	0.125015
GSM2334266_7766148001_R06C02	81	0.167354	0.025276	0.0412296	0.025887	0.0788192	0.121824	0.0907166	0.0267837	0.238702	0.202868	0.114433	0.0434478	0.263682	0.0603632	0.044051	0.0656466	0.0448448	0.0240212	0.180255	0.0791385	0.0334352	0.0794708	0.234695	0.143247	0.0385924	0.117536	0.0581732	0.0774218	0.143035	0.0888898	0.0510285	0.021169	0.123372	0.10266	0.363758	0.309169	0.320929	0.0600325	0.337068	0.113141	0.0895186	0.162898	0.0903124	0.141799	0.0150368	0.0506046	0.172979	0.103998
GSM2334377_9370847124_R04C01	81	0.229013	0.0349067	0.0209881	0.0274194	0.171857	0.10526	0.11503	0.0264274	0.193269	0.139707	0.0899341	0.0414268	0.238615	0.142367	0.0830888	0.0812966	0.0551256	0.0267788	0.268542	0.0887784	0.0300958	0.130726	0.335801	0.289473	0.0558815	0.258553	0.102037	0.138226	0.213315	0.118005	0.128727	0.0215303	0.124257	0.159045	0.514449	0.358934	0.439842	0.101931	0.391589	0.20122	0.191989	0.309559	0.149148	0.206763	0.030443	0.0509519	0.164408	0.195323
GSM2334406_9376537113_R04C01	81	0.0909002	0.0145828	0.0139613	0.0348743	0.0469173	0.0610887	0.0784526	0.0234689	0.118173	0.199568	0.0554734	0.0500775	0.0866775	0.0639375	0.0388665	0.122733	0.0388019	0.0170095	0.120898	0.0550951	0.0123297	0.0744133	0.0665511	0.0661256	0.0611183	0.0843965	0.0313359	0.0762847	0.16746	0.0517801	0.0602219	0.0325122	0.0647837	0.0746247	0.180789	0.355048	0.140091	0.0564233	0.177513	0.109832	0.0633256	0.0599732	0.0436427	0.102881	0.0307831	0.0468119	0.115811	0.0762871
GSM2334430_9376538150_R04C01	81	0.168711	0.0129092	0.041425	0.0245826	0.101668	0.0916777	0.0775695	0.0177505	0.239319	0.249848	0.0938062	0.0380988	0.23246	0.0593167	0.0456174	0.100379	0.0434287	0.0205538	0.255308	0.0504539	0.0231602	0.0824151	0.252389	0.307464	0.106322	0.130459	0.0285774	0.0827359	0.169454	0.113656	0.0789992	0.0157825	0.12872	0.118117	0.487333	0.339644	0.353353	0.0914185	0.332391	0.16077	0.138228	0.212901	0.0816643	0.113041	0.0160186	0.0775763	0.136048	0.124186
GSM2334520_9376561048_R01C01	81	0.120681	0.0199642	0.0542493	0.0275115	0.0844597	0.0716023	0.0986766	0.0291805	0.193589	0.285086	0.14632	0.0483645	0.289441	0.0616957	0.0879306	0.116598	0.0465446	0.0194528	0.235832	0.0983087	0.0400817	0.117631	0.258739	0.29521	0.0602519	0.158282	0.0397118	0.134355	0.211614	0.103973	0.0896602	0.0281614	0.15355	0.102143	0.417282	0.35632	0.395493	0.0895042	0.337407	0.128436	0.133154	0.171981	0.0946369	0.103334	0.0193671	0.105127	0.200561	0.177617
GSM2334593_7766148103_R05C02	81	0.0616255	0.0171633	0.0208637	0.0286806	0.0480815	0.0533044	0.0557851	0.0193999	0.124697	0.128236	0.0854364	0.0429058	0.162009	0.0380661	0.0216446	0.0365119	0.0356789	0.0231746	0.0589273	0.0418006	0.0222695	0.0243591	0.071002	0.231499	0.0297363	0.107801	0.0549696	0.100824	0.150166	0.0373729	0.0277175	0.0315867	0.0510296	0.0716655	0.188615	0.298264	0.23916	0.0592124	0.123677	0.0791568	0.102898	0.0649833	0.078787	0.0564167	0.0236941	0.0470893	0.131352	0.102975
GSM2333917_7766148025_R04C02	80	0.169221	0.0171476	0.0629637	0.0338572	0.112355	0.158362	0.0197715	0.0502199	0.245702	0.260685	0.130923	0.0453151	0.19675	0.06718	0.0309364	0.136858	0.0360006	0.00946518	0.245499	0.0846714	0.0305083	0.0637863	0.292469	0.280905	0.0587422	0.172899	0.0492435	0.0730185	0.204917	0.123554	0.0535904	0.0248963	0.111694	0.162369	0.436761	0.289634	0.330813	0.080627	0.324583	0.122653	0.136442	0.169526	0.0707587	0.135044	0.0155163	0.0545344	0.25075	0.203683
GSM2333933_9370847011_R04C01	80	0.337535	0.0307972	0.0470451	0.0410795	0.169712	0.256464	0.106929	0.125936	0.312009	0.285627	0.216417	0.045927	0.353862	0.128583	0.106852	0.18308	0.025836	0.024055	0.461061	0.159063	0.0716353	0.255397	0.470397	0.407232	0.052598	0.346166	0.160107	0.212914	0.210785	0.235691	0.200823	0.0257861	0.26833	0.208779	0.589554	0.503833	0.512787	0.164809	0.468209	0.161583	0.246502	0.40429	0.118429	0.248241	0.0204186	0.103914	0.185056	0.206066
GSM2334030_9379082138_R04C01	80	0.159116	0.0154135	0.00894052	0.034296	0.026632	0.149672	0.0682805	0.0263301	0.11232	0.177001	0.0965434	0.0359019	0.120958	0.0660415	0.0399782	0.0622795	0.0344188	0.0155616	0.125687	0.0563939	0.0265527	0.0329974	0.152981	0.19291	0.0349108	0.122182	0.0309678	0.0784091	0.200986	0.0552679	0.0550918	0.0214155	0.0666967	0.0780736	0.290653	0.29519	0.220064	0.0737691	0.229694	0.104422	0.0623522	0.105082	0.0447913	0.133834	0.0303453	0.0562714	0.167043	0.104968
GSM2334063_9370847081_R02C02	80	0.160804	0.0173098	0.0562621	0.0347474	0.050769	0.161848	0.0846519	0.0238448	0.15736	0.1603	0.136257	0.0638978	0.22436	0.0806681	0.0397837	0.0833539	0.020594	0.0272835	0.270715	0.0564916	0.0316249	0.0568313	0.163623	0.227327	0.0606349	0.164211	0.0433984	0.144878	0.190473	0.0837779	0.0593997	0.0238003	0.0840153	0.0595238	0.194759	0.378525	0.253949	0.0818572	0.209665	0.119044	0.101765	0.119464	0.0493657	0.119567	0.0238297	0.0640103	0.132959	0.127693
GSM2334125_9370847125_R04C02	80	0.0919415	0.021449	0.0146732	0.0327108	0.0344726	0.104657	0.0785243	0.0273176	0.187447	0.124986	0.177062	0.0520198	0.0774722	0.0591832	0.0247888	0.0843457	0.0317176	0.0195206	0.202655	0.055569	0.0351974	0.0569624	0.19481	0.225458	0.0304905	0.113043	0.0442867	0.0619868	0.182677	0.0447517	0.0507412	0.0253206	0.0879427	0.0974026	0.234894	0.286621	0.190519	0.0773569	0.221759	0.1587	0.0494965	0.0869973	0.0637461	0.146442	0.0242649	0.0444433	0.157013	0.14298
GSM2334307_9379082102_R02C01	80	0.0878115	0.0229375	0.028777	0.0296235	0.0990643	0.146477	0.0944658	0.0242921	0.175782	0.208503	0.171343	0.0485511	0.179001	0.0628773	0.0410179	0.104714	0.0583615	0.019337	0.184446	0.0427172	0.0283212	0.144623	0.258709	0.221484	0.0308755	0.138044	0.0295142	0.10632	0.17245	0.0377273	0.0537877	0.0684661	0.0864667	0.09207	0.40286	0.279147	0.19525	0.0870753	0.344492	0.18225	0.215575	0.179274	0.0934749	0.0919735	0.0270446	0.039205	0.195698	0.16005
GSM2334409_7512560102_R02C01	80	0.126283	0.00358206	0.0289103	0.0198176	0.0895522	0.142279	0.0682165	0.0456877	0.234594	0.167633	0.135165	0.0383003	0.124202	0.0764435	0.0691433	0.0905086	0.0287094	0.0200412	0.145959	0.0753497	0.0275408	0.114636	0.216598	0.357437	0.0247111	0.131401	0.0338562	0.0700465	0.173404	0.0499146	0.0941063	0.0148706	0.110941	0.111153	0.325301	0.368587	0.341984	0.108116	0.304612	0.212413	0.052622	0.11771	0.103783	0.107284	0.0187105	0.0443491	0.163729	0.134408
GSM2334455_9379082101_R02C01	80	0.155162	0.0171478	0.0173206	0.0400924	0.0428453	0.0815596	0.084893	0.0727713	0.208558	0.197993	0.1377	0.0748778	0.10484	0.0662069	0.0706554	0.0872122	0.0273601	0.0183537	0.145174	0.0949606	0.0235719	0.0661611	0.183388	0.168565	0.0319226	0.16474	0.030034	0.110811	0.177992	0.0551305	0.0529989	0.054878	0.0882388	0.0481271	0.394137	0.254549	0.332884	0.0764565	0.239226	0.120496	0.0499568	0.109263	0.117197	0.0979823	0.0320146	0.0377196	0.134434	0.127886
GSM2334503_7766148098_R02C01	80	0.113777	0.0155206	0.0266496	0.0301457	0.0439484	0.0752653	0.0328024	0.0347552	0.207068	0.219492	0.100692	0.0509865	0.102637	0.0494702	0.0279916	0.0820873	0.0201668	0.0309072	0.110024	0.0674205	0.0194756	0.0514902	0.189638	0.186275	0.0293578	0.136929	0.0411948	0.0729845	0.163074	0.0488558	0.0403605	0.0256159	0.133426	0.105637	0.271339	0.266306	0.246524	0.0508577	0.248461	0.156856	0.153168	0.161939	0.0832437	0.0663852	0.019794	0.050415	0.164758	0.136142
GSM2334508_7766148131_R05C02	80	0.115726	0.0203323	0.0362572	0.0261496	0.0619588	0.102427	0.0439433	0.021528	0.198654	0.206245	0.113408	0.0395403	0.137853	0.080975	0.0338813	0.0688935	0.0322411	0.0261327	0.129049	0.0530321	0.0216558	0.0469293	0.166632	0.180424	0.0360209	0.0981326	0.03605	0.075429	0.153636	0.0541658	0.0394678	0.0346041	0.0917489	0.0801575	0.312029	0.309347	0.258567	0.0495531	0.239989	0.112224	0.0920242	0.143605	0.0456129	0.0981442	0.0228723	0.0370233	0.160997	0.143433
GSM2334546_9376561015_R05C01	80	0.206607	0.0232862	0.054612	0.0238405	0.235269	0.15399	0.10416	0.0370596	0.209161	0.260342	0.154231	0.0536544	0.257035	0.127357	0.0753691	0.0952184	0.0951159	0.0140047	0.373123	0.103445	0.0394631	0.153157	0.249166	0.379872	0.0742355	0.146816	0.108817	0.14239	0.2034	0.221155	0.0877824	0.033054	0.165834	0.199035	0.449228	0.360437	0.335143	0.127678	0.343432	0.155003	0.241463	0.257549	0.139349	0.167743	0.0174229	0.0675425	0.215516	0.13828
GSM2334575_7766148098_R05C02	80	0.204512	0.018167	0.090441	0.0365644	0.0532319	0.150377	0.0805039	0.0341439	0.262473	0.187474	0.207368	0.0529941	0.126727	0.100863	0.0420083	0.0989772	0.0268363	0.0252259	0.19828	0.0684412	0.03504	0.0636144	0.301369	0.262577	0.0287548	0.136003	0.146959	0.146029	0.153797	0.089949	0.0812243	0.00950821	0.142441	0.0647179	0.436666	0.278896	0.300112	0.116456	0.315282	0.110144	0.0484836	0.301252	0.107513	0.173448	0.0203185	0.0483105	0.171502	0.157796
GSM2334622_7766148080_R01C02	80	0.128888	0.0286694	0.0132963	0.0396771	0.0663851	0.0681217	0.0688043	0.0205918	0.146931	0.287353	0.0914518	0.0497868	0.152762	0.0587644	0.0248785	0.0646597	0.0342037	0.0284622	0.197594	0.0478769	0.0315547	0.0492727	0.164237	0.131336	0.0508434	0.12528	0.0329895	0.117913	0.152729	0.0772765	0.0352447	0.0311921	0.0927734	0.0713854	0.238302	0.298698	0.18488	0.0705527	0.216288	0.0728204	0.0913586	0.136366	0.0750346	0.136443	0.0251658	0.0490182	0.185563	0.124605
GSM2333940_7766148005_R06C02	79	0.279264	0.025815	0.060483	0.0236033	0.199046	0.115207	0.0827243	0.0305621	0.25657	0.22085	0.117362	0.0388172	0.343121	0.0865983	0.0649013	0.0998048	0.0230809	0.0199868	0.298537	0.139931	0.0485208	0.129691	0.283877	0.280108	0.0612924	0.199564	0.0848872	0.115774	0.199188	0.186858	0.0984905	0.0359977	0.178473	0.228594	0.491514	0.430804	0.368579	0.119392	0.391561	0.0952289	0.217427	0.243426	0.127441	0.151551	0.0189844	0.0567988	0.164466	0.14281
GSM2334004_9376538120_R02C01	79	0.160112	0.0117433	0.0229226	0.0239175	0.0480911	0.085979	0.0925352	0.0311029	0.142206	0.190928	0.167003	0.0546093	0.133641	0.0678006	0.0232255	0.100123	0.0448514	0.0241406	0.183138	0.0526679	0.0314576	0.0759101	0.231183	0.191802	0.0694079	0.084315	0.0517825	0.104064	0.1975	0.189307	0.104158	0.0313384	0.116356	0.0796126	0.347567	0.283632	0.330504	0.0831196	0.287459	0.123272	0.0825464	0.123402	0.0814177	0.117089	0.036803	0.0542732	0.109209	0.0793263
GSM2334014_9370847081_R05C01	79	0.159998	0.0333552	0.0308581	0.027145	0.0642895	0.181996	0.101056	0.0269676	0.232292	0.251646	0.111809	0.0515593	0.21886	0.0799075	0.0521155	0.0887451	0.0297247	0.0187279	0.102365	0.0438055	0.0306198	0.0593662	0.19152	0.220784	0.0591685	0.1766	0.0444653	0.0674181	0.17968	0.11154	0.0785995	0.0292134	0.124006	0.150471	0.319564	0.313771	0.329718	0.0860147	0.268859	0.12965	0.0991668	0.1436	0.0635219	0.107627	0.022685	0.0648785	0.170679	0.156876
GSM2334064_9370847081_R05C02	79	0.227802	0.030843	0.025679	0.0271635	0.177123	0.104386	0.0545546	0.0636625	0.199406	0.263041	0.188644	0.0659021	0.1864	0.096449	0.0491014	0.10956	0.0311387	0.0215175	0.151582	0.0845178	0.0351151	0.117089	0.253587	0.185187	0.0357448	0.15569	0.047138	0.134828	0.188263	0.0881915	0.0641998	0.0183661	0.0927417	0.120476	0.498756	0.360118	0.330664	0.0870934	0.289993	0.176121	0.0851774	0.197444	0.118641	0.174452	0.0252496	0.0665221	0.232255	0.174759
GSM2334248_9376537113_R03C02	79	0.188249	0.0277539	0.0305506	0.0357563	0.115463	0.121263	0.104461	0.0370583	0.224628	0.292808	0.0918402	0.0538866	0.217265	0.0741487	0.0980166	0.10976	0.0526733	0.017971	0.201248	0.137424	0.0358295	0.0766514	0.237057	0.27712	0.0718126	0.128216	0.0676588	0.126995	0.209068	0.0873033	0.0829768	0.0327533	0.18174	0.150067	0.419531	0.386049	0.353642	0.110549	0.307141	0.199221	0.101144	0.208596	0.0996303	0.18345	0.0274788	0.0957659	0.173543	0.12032
GSM2334276_9379082102_R03C01	79	0.196353	0.019557	0.01563	0.0340877	0.167912	0.151213	0.117699	0.0275321	0.247155	0.314111	0.168298	0.0532143	0.281254	0.0909807	0.0501101	0.0803315	0.0425307	0.0264616	0.252234	0.0671409	0.0525654	0.104312	0.218885	0.263218	0.0637323	0.158833	0.0952176	0.0659808	0.192322	0.181564	0.071499	0.0339617	0.118265	0.121498	0.395178	0.346534	0.417417	0.0744891	0.299743	0.110937	0.146541	0.205588	0.104454	0.0805265	0.0315524	0.0514086	0.161726	0.122654
GSM2334540_9376561015_R02C01	79	0.162357	0.0325947	0.0280982	0.0287726	0.174981	0.162621	0.106661	0.0299135	0.272017	0.275827	0.179618	0.0502487	0.263492	0.0955455	0.0520131	0.107124	0.0370071	0.0266624	0.362643	0.126289	0.0376933	0.134216	0.282086	0.280074	0.0732677	0.263201	0.0558624	0.114512	0.217465	0.146208	0.092744	0.0407674	0.122305	0.147766	0.464961	0.404114	0.331785	0.0955068	0.349802	0.178596	0.184551	0.277068	0.100315	0.134239	0.0205802	0.0696743	0.223337	0.142295
GSM2334223_9376538092_R01C01	78	0.25641	0.0325461	0.0478592	0.0311337	0.269388	0.119486	0.124689	0.0385373	0.283155	0.370947	0.160195	0.0577735	0.367261	0.177671	0.10441	0.188507	0.12666	0.039452	0.304964	0.0793149	0.0492533	0.18809	0.366184	0.378275	0.0942259	0.302011	0.118084	0.252635	0.192999	0.244145	0.187296	0.0397705	0.18193	0.196716	0.556371	0.474387	0.470051	0.183419	0.447048	0.216765	0.230641	0.345361	0.149646	0.217661	0.0267763	0.141524	0.295734	0.269647
GSM2334488_7766148061_R02C02	78	0.303685	0.0350541	0.0149509	0.0496119	0.199615	0.102111	0.0524838	0.0303751	0.246119	0.328159	0.175787	0.0642027	0.352864	0.119609	0.0383705	0.203089	0.0594882	0.0204329	0.251494	0.146226	0.0639243	0.153978	0.254496	0.222149	0.0412493	0.210498	0.0481262	0.112705	0.176452	0.18109	0.0811983	0.0402045	0.137808	0.184295	0.428937	0.367357	0.418096	0.124847	0.31742	0.193318	0.238164	0.262029	0.141311	0.194413	0.0226015	0.0577137	0.196891	0.197589
GSM2334501_7766148098_R01C01	78	0.108913	0.0260954	0.0174694	0.0258413	0.0580948	0.0797667	0.0722771	0.0274129	0.152462	0.132542	0.0803082	0.0420217	0.159641	0.0434153	0.0116572	0.0569145	0.0435931	0.0170662	0.103868	0.0676484	0.0893907	0.0465532	0.17339	0.135078	0.0400469	0.160695	0.0227026	0.0733448	0.175813	0.0580416	0.0311416	0.0257534	0.119498	0.110481	0.30451	0.283933	0.190748	0.0636716	0.26542	0.0960656	0.0808568	0.351306	0.0735403	0.0928789	0.0232618	0.0350247	0.108927	0.106656
GSM2334048_7766148058_R06C01	77	0.237515	0.0327117	0.0272967	0.0250879	0.215736	0.162701	0.0979353	0.0429429	0.230873	0.25263	0.218461	0.0361762	0.377035	0.0607715	0.0269784	0.083605	0.0386219	0.012813	0.379397	0.218211	0.0378843	0.108133	0.264436	0.326909	0.0720704	0.200593	0.0641775	0.106282	0.161534	0.0939674	0.0777227	0.031665	0.175463	0.174432	0.498865	0.409185	0.44244	0.0913241	0.40348	0.158727	0.144443	0.251209	0.0633186	0.0924157	0.0252425	0.0606891	0.159224	0.181061
GSM2334114_9370847081_R02C01	77	0.171342	0.0291126	0.0146187	0.0340441	0.118575	0.0767645	0.0895645	0.0453654	0.15583	0.261803	0.0893611	0.0581097	0.188862	0.0483606	0.0467761	0.0937662	0.0306649	0.0155339	0.108666	0.0501502	0.0267949	0.0509578	0.163005	0.244182	0.0628436	0.0994537	0.0178937	0.104361	0.187764	0.0505582	0.0609925	0.028204	0.128759	0.1139	0.252162	0.312066	0.312143	0.0759575	0.30837	0.167694	0.142361	0.115559	0.0595109	0.130326	0.034774	0.0475913	0.205749	0.137833
GSM2334163_9370847092_R06C01	77	0.102684	0.0258783	0.0233497	0.0268654	0.0635434	0.0511466	0.0780405	0.0234538	0.155916	0.186223	0.0649612	0.0420129	0.161876	0.0897505	0.0480328	0.143559	0.0400706	0.0179531	0.164527	0.0521838	0.0221439	0.068158	0.197581	0.144472	0.065864	0.102692	0.0246123	0.0912098	0.163548	0.0583805	0.0347615	0.0352314	0.0905283	0.0547894	0.288383	0.267987	0.180901	0.0831638	0.232314	0.110043	0.0817428	0.0832184	0.0779118	0.103999	0.0159611	0.0666639	0.193724	0.144942
GSM2334231_9379082101_R05C02	77	0.210593	0.0211877	0.019108	0.0282664	0.0449684	0.101587	0.0824703	0.126681	0.207295	0.292071	0.0958138	0.0450486	0.168048	0.0496858	0.0375669	0.157748	0.0288783	0.0178238	0.217208	0.0709294	0.0309511	0.116216	0.251313	0.264804	0.0479733	0.206572	0.106036	0.084484	0.173846	0.0380331	0.0643949	0.0285344	0.147789	0.0799644	0.327395	0.355399	0.25474	0.0683707	0.341186	0.13128	0.122362	0.22552	0.0823952	0.154839	0.0416387	0.0437253	0.17472	0.0950564
GSM2334389_9370847124_R01C02	77	0.0842223	0.0227511	0.0138253	0.0349294	0.0860424	0.0839468	0.0690856	0.0268391	0.108493	0.215227	0.0668714	0.0531807	0.160306	0.0397093	0.0274904	0.06148	0.0329366	0.0208729	0.0830805	0.0442631	0.033257	0.0650805	0.120506	0.130675	0.0469374	0.0879322	0.0320081	0.0811062	0.199113	0.0217308	0.0387742	0.0219367	0.0782105	0.0476608	0.31145	0.243905	0.277057	0.0566448	0.218211	0.112905	0.0974243	0.0968514	0.030855	0.0990663	0.0303442	0.0371255	0.135843	0.1218
GSM2334590_7766148080_R04C01	77	0.0733824	0.030363	0.048742	0.0329458	0.0256141	0.0769518	0.0760645	0.0214541	0.107621	0.204269	0.0904227	0.0409409	0.0863763	0.0816679	0.0277921	0.0696832	0.0344754	0.0218536	0.109676	0.118417	0.0282178	0.0707829	0.09903	0.156482	0.0535047	0.0936317	0.0572536	0.113987	0.126048	0.0815608	0.0405812	0.0285127	0.128266	0.13847	0.246478	0.1436	0.320226	0.0761798	0.182406	0.0929013	0.0492726	0.0917928	0.0527049	0.0908043	0.020852	0.0484659	0.133141	0.130238
GSM2334592_7766148080_R03C01	77	0.120047	0.0372777	0.0112729	0.0330989	0.169897	0.129382	0.0715407	0.0450721	0.222185	0.233514	0.201763	0.0445588	0.25813	0.113794	0.0400964	0.0699411	0.0388299	0.0269496	0.143935	0.125191	0.0274028	0.0827217	0.184196	0.240627	0.167398	0.145981	0.0332692	0.123003	0.177293	0.173313	0.0558664	0.0307288	0.113502	0.164469	0.494776	0.384766	0.376627	0.0571231	0.300492	0.131076	0.218966	0.230021	0.181777	0.11758	0.0156326	0.0933514	0.168242	0.132454
GSM2334612_7512551003_R03C02	77	0.186279	0.0181594	0.0159258	0.0330389	0.0751413	0.138163	0.0736885	0.0317434	0.173719	0.175978	0.175459	0.0657161	0.175787	0.050265	0.0403159	0.093571	0.0250539	0.0191688	0.140507	0.0739245	0.038961	0.0783638	0.186934	0.216832	0.0225598	0.166772	0.061682	0.0730337	0.163735	0.0866359	0.0707329	0.0156175	0.121465	0.104545	0.397283	0.316841	0.294913	0.0772815	0.329787	0.105652	0.130529	0.144332	0.066758	0.134277	0.0123851	0.0461546	0.194396	0.13807
GSM2333906_7766148116_R01C02	76	0.244293	0.0190535	0.0749194	0.0340158	0.262847	0.226594	0.0902579	0.0431951	0.25065	0.226023	0.144174	0.0586594	0.26608	0.0886441	0.101766	0.12364	0.0645395	0.0147588	0.315366	0.171718	0.0468323	0.148268	0.358449	0.323508	0.0829211	0.15517	0.0580363	0.149133	0.246463	0.171108	0.0765712	0.0404218	0.143377	0.255673	0.539011	0.440571	0.44979	0.15247	0.424724	0.155875	0.283213	0.273062	0.10431	0.144718	0.0278102	0.0687588	0.171876	0.159021
GSM2334037_9379082138_R04C02	76	0.0862706	0.0290698	0.0119612	0.0296516	0.0371379	0.105789	0.0765172	0.0194098	0.129847	0.183903	0.110725	0.0543472	0.103806	0.0695667	0.016345	0.0678936	0.0166426	0.0143267	0.0539447	0.0601731	0.0314809	0.0825991	0.14908	0.122058	0.0327059	0.111355	0.0167524	0.0693606	0.154406	0.0269834	0.0448647	0.0244923	0.0753562	0.066075	0.370921	0.257413	0.24046	0.0460743	0.19277	0.138145	0.0523899	0.100187	0.0693223	0.111155	0.0227042	0.0410554	0.165225	0.094638
GSM2334069_7766148120_R03C02	76	0.166397	0.01838	0.0162117	0.0300513	0.129317	0.110484	0.0418228	0.0217597	0.190136	0.145346	0.148414	0.0398402	0.238381	0.0628117	0.0339541	0.108193	0.0178459	0.0190823	0.109448	0.0588504	0.0268092	0.0586741	0.219102	0.131485	0.0289514	0.154767	0.0266249	0.0665834	0.162356	0.0677608	0.0625774	0.0255445	0.12826	0.106556	0.338601	0.337104	0.324614	0.0553642	0.291304	0.0997599	0.142546	0.141425	0.0509818	0.133091	0.0193627	0.0511029	0.165825	0.13742
GSM2334087_9370847015_R01C01	76	0.210637	0.0222271	0.0173487	0.0401845	0.0427113	0.110807	0.0555011	0.0413455	0.175238	0.113505	0.117023	0.0594044	0.271482	0.0680851	0.0661206	0.0679851	0.0491082	0.0122769	0.174974	0.0734206	0.0443291	0.0335024	0.23114	0.267791	0.0667599	0.117905	0.0401911	0.0881049	0.188666	0.135858	0.0789449	0.0222007	0.140202	0.148324	0.386577	0.32529	0.354591	0.10769	0.339463	0.127144	0.182452	0.169331	0.104351	0.0723562	0.0339358	0.0820812	0.131535	0.141397
GSM2334139_7766148005_R01C02	76	0.191043	0.0327932	0.090263	0.0251778	0.167751	0.150333	0.0671053	0.0347078	0.193646	0.185129	0.160821	0.0634278	0.264557	0.111515	0.058356	0.113715	0.0475819	0.0209006	0.334828	0.0564322	0.0467648	0.111913	0.291996	0.222568	0.0404405	0.265976	0.0604491	0.155733	0.177342	0.0831362	0.0779263	0.0248178	0.118709	0.174941	0.437772	0.370027	0.433265	0.0821666	0.361142	0.238164	0.123805	0.221001	0.120636	0.136959	0.0212547	0.0777851	0.17528	0.14458
GSM2334311_9379082152_R02C02	76	0.342808	0.0230588	0.0934116	0.0228225	0.171101	0.123967	0.139634	0.0334471	0.265707	0.273066	0.353799	0.032095	0.337148	0.151791	0.0839181	0.158184	0.0397211	0.0113058	0.358983	0.141961	0.0391044	0.203834	0.357308	0.36031	0.0622562	0.301949	0.134295	0.113382	0.253903	0.272293	0.163746	0.0219511	0.205853	0.283886	0.502362	0.485538	0.492638	0.142308	0.467035	0.187212	0.331302	0.331081	0.205862	0.184243	0.0233137	0.0843993	0.1983	0.18623
GSM2334514_9376561056_R05C02	76	0.10392	0.0392364	0.0475745	0.0219959	0.0578681	0.116781	0.136844	0.0190189	0.172939	0.246666	0.07176	0.0503937	0.156048	0.0682088	0.0451647	0.0703736	0.0406897	0.0415605	0.140307	0.0526358	0.0302019	0.0778131	0.150459	0.129415	0.0906554	0.132838	0.0876517	0.0905098	0.146692	0.0763052	0.0629791	0.0262031	0.0773703	0.0920433	0.340566	0.250307	0.217878	0.0639993	0.223374	0.0716157	0.15134	0.189615	0.0410311	0.101261	0.0242119	0.0605712	0.129842	0.10313
GSM2333925_9370847011_R01C01	75	0.155454	0.0183695	0.025749	0.0439297	0.102178	0.179893	0.0858681	0.0308659	0.246459	0.228332	0.0915809	0.0566359	0.20832	0.0540159	0.0647838	0.0783537	0.0375613	0.0124016	0.179789	0.0990883	0.0329521	0.0792441	0.224006	0.174835	0.0360353	0.189438	0.0333333	0.0583832	0.213089	0.120439	0.0809367	0.0387432	0.126497	0.186386	0.36047	0.374804	0.40601	0.0822619	0.323308	0.125964	0.0903219	0.121409	0.0548456	0.127393	0.0211736	0.0614633	0.191795	0.186505
GSM2334046_9370847091_R03C02	75	0.199278	0.0246026	0.0381104	0.0400794	0.173785	0.1112	0.0763653	0.0505695	0.18928	0.268186	0.0850705	0.0478488	0.277262	0.100124	0.100965	0.1374	0.0239217	0.0157802	0.284966	0.104857	0.0549913	0.0933824	0.179796	0.292554	0.0552394	0.15762	0.0956697	0.103897	0.198519	0.168823	0.0779085	0.0246491	0.113337	0.146684	0.343731	0.444588	0.403257	0.149424	0.257108	0.142146	0.176781	0.151216	0.145139	0.119751	0.0267694	0.075658	0.179985	0.193337
GSM2334278_7766148001_R03C01	75	0.116742	0.0165837	0.0123805	0.0320846	0.0626493	0.0919618	0.0397799	0.0278819	0.153592	0.184098	0.0920282	0.0543345	0.159297	0.0624265	0.0486061	0.0576148	0.0207897	0.0266971	0.0896332	0.0401967	0.0297805	0.0593932	0.113922	0.111042	0.048128	0.0849664	0.03199	0.0881048	0.132781	0.035397	0.0501688	0.020542	0.112377	0.0406001	0.271179	0.244068	0.258456	0.066484	0.133263	0.0863282	0.125019	0.0839726	0.0455012	0.130007	0.0201222	0.0492849	0.162709	0.125469
GSM2334281_7766148001_R02C02	75	0.206871	0.00901361	0.0663013	0.0324001	0.134152	0.129864	0.0635912	0.0624786	0.232237	0.197664	0.149397	0.0505081	0.193266	0.0850019	0.0452451	0.102448	0.025187	0.0213765	0.213253	0.07586	0.0347821	0.0660878	0.245471	0.234221	0.0185382	0.120588	0.0546962	0.0870847	0.18516	0.139566	0.0819203	0.0301306	0.116845	0.117294	0.419331	0.345632	0.418835	0.0897831	0.327619	0.171159	0.100017	0.154485	0.0713462	0.128625	0.0255448	0.0536233	0.197571	0.207693
GSM2334296_9376561035_R05C01	75	0.122155	0.0112757	0.0262711	0.0269196	0.079808	0.0814913	0.0948454	0.0255773	0.1543	0.308998	0.12221	0.0388015	0.157345	0.0563988	0.0410374	0.0986016	0.0304827	0.025615	0.129008	0.0554502	0.0368339	0.0748209	0.139496	0.14904	0.0654639	0.107255	0.0312551	0.0859461	0.191488	0.100763	0.0528988	0.0198869	0.0969001	0.0817826	0.287035	0.244705	0.259817	0.0589894	0.264528	0.1331	0.0601342	0.169685	0.0827292	0.0941708	0.0187945	0.0482604	0.142634	0.105006
GSM2334453_7766148116_R05C02	75	0.135423	0.0424188	0.122762	0.0306463	0.129521	0.0657862	0.052508	0.027514	0.131886	0.210246	0.131981	0.0552036	0.153056	0.093383	0.0457798	0.0619848	0.0294036	0.0190142	0.129177	0.0626065	0.0289901	0.0655496	0.15589	0.183696	0.042454	0.12206	0.162388	0.0747792	0.147383	0.0396732	0.0447974	0.0335122	0.101436	0.0982653	0.298376	0.369222	0.310632	0.0609976	0.295807	0.221736	0.271516	0.13469	0.169217	0.0824639	0.0237302	0.0414411	0.164104	0.0867903
GSM2334562_7766148012_R06C02	75	0.188814	0.0200566	0.0526842	0.0228282	0.0895072	0.136712	0.0596586	0.0266547	0.231398	0.351802	0.153338	0.0396502	0.221274	0.0959865	0.0519428	0.104329	0.0308103	0.0201313	0.259405	0.158172	0.0190492	0.0769009	0.315509	0.325272	0.0353044	0.281218	0.111787	0.0929614	0.172772	0.156006	0.0772657	0.0369466	0.12297	0.177646	0.472868	0.334598	0.445469	0.0925906	0.3518	0.132699	0.166241	0.280272	0.101951	0.137395	0.017223	0.0630065	0.162639	0.158771
GSM2334582_7766148098_R03C02	75	0.182863	0.0109803	0.0453498	0.0329766	0.0326121	0.0831472	0.0502254	0.0262322	0.165387	0.179795	0.155188	0.0413412	0.0763972	0.0476086	0.0210474	0.0786786	0.0538314	0.0180103	0.095169	0.0650742	0.0332609	0.0794943	0.136651	0.209648	0.0386357	0.122481	0.033835	0.073655	0.145705	0.0357092	0.0532337	0.0200358	0.105791	0.0825728	0.287814	0.225333	0.2693	0.0685203	0.175967	0.117738	0.0550699	0.0900509	0.039667	0.128089	0.026728	0.0382862	0.166154	0.147718
GSM2334601_7766148084_R04C01	75	0.121015	0.017047	0.0116973	0.0287375	0.0253728	0.107501	0.0453319	0.0270345	0.132022	0.234643	0.108005	0.0506967	0.0671725	0.058764	0.0352963	0.0547827	0.0144578	0.0230576	0.13129	0.0478079	0.0364266	0.0648325	0.216747	0.20435	0.0300331	0.118381	0.0372496	0.0765545	0.15269	0.0654624	0.0381769	0.0227419	0.087959	0.0805493	0.250553	0.287432	0.255537	0.0665723	0.186205	0.0830317	0.0642158	0.0963511	0.0493373	0.102999	0.0273403	0.0335667	0.196597	0.155822
GSM2333905_9370847096_R06C02	74	0.0995778	0.0318766	0.0156101	0.0501775	0.0492467	0.0842929	0.0739385	0.0222189	0.164166	0.196024	0.134208	0.0495926	0.0794582	0.078319	0.0298496	0.0762117	0.0269284	0.0242931	0.192316	0.0424063	0.0208898	0.0513325	0.125751	0.0941867	0.0411005	0.106473	0.0343523	0.0983307	0.153002	0.0365551	0.0425984	0.0407136	0.0620356	0.093058	0.246518	0.214172	0.236667	0.0701605	0.206558	0.0996167	0.0608173	0.0883368	0.0825737	0.128694	0.0253499	0.0445001	0.179915	0.130541
GSM2333927_9370847011_R02C01	74	0.247878	0.0178682	0.0433246	0.0362702	0.0304644	0.127622	0.0644868	0.0295296	0.231673	0.246874	0.0953091	0.0832646	0.174502	0.119048	0.0616611	0.105666	0.0206871	0.0150519	0.223699	0.159812	0.0268084	0.107987	0.247473	0.292068	0.0169326	0.151262	0.0990177	0.0894956	0.164308	0.101804	0.0747793	0.0328063	0.12136	0.215973	0.38078	0.411448	0.385708	0.077843	0.35534	0.167118	0.192945	0.211987	0.0708808	0.164515	0.0229704	0.036755	0.203431	0.185407
GSM2334032_9379082138_R05C01	74	0.16393	0.0300485	0.0510536	0.0314662	0.0422465	0.133402	0.099575	0.0308167	0.205158	0.250768	0.129933	0.0498322	0.260008	0.0930442	0.0887417	0.127995	0.0630958	0.0303366	0.271862	0.0814641	0.038305	0.101883	0.227288	0.353669	0.0570293	0.186065	0.0304211	0.152256	0.217618	0.143145	0.1088	0.0315236	0.11955	0.0952333	0.44642	0.306351	0.386088	0.0979596	0.273602	0.2035	0.111271	0.174099	0.0974171	0.127774	0.0301312	0.0690548	0.215387	0.175157
GSM2334054_9370847092_R04C02	74	0.120318	0.0269888	0.0157065	0.0386498	0.0707177	0.0954208	0.0766862	0.032545	0.132152	0.129863	0.172735	0.0508809	0.172045	0.0587173	0.0656314	0.0788008	0.0336281	0.0235124	0.150567	0.0473487	0.0267904	0.0483832	0.129027	0.115345	0.0609316	0.0938742	0.0570066	0.134052	0.156492	0.0221009	0.0458951	0.0273959	0.107839	0.192428	0.223039	0.299813	0.224078	0.0615155	0.271497	0.154463	0.082688	0.0707062	0.0422919	0.0955392	0.0182944	0.0280198	0.145923	0.123839
GSM2334258_9376561035_R02C02	74	0.139025	0.0194137	0.0129441	0.0297615	0.0812588	0.0544395	0.084128	0.027671	0.168285	0.21161	0.0833224	0.0583494	0.090503	0.0429383	0.0271263	0.0595543	0.0262047	0.0158493	0.173719	0.0650864	0.0236318	0.0451879	0.251449	0.130557	0.0393456	0.179485	0.0294479	0.0874973	0.166774	0.104005	0.0646518	0.0275546	0.0866536	0.049403	0.250438	0.311372	0.271011	0.0461645	0.208496	0.169126	0.0577842	0.104578	0.115541	0.117333	0.025183	0.0662238	0.180078	0.146355
GSM2334283_7766148001_R03C02	74	0.215011	0.00921068	0.0179478	0.025638	0.100633	0.083273	0.0508239	0.0334123	0.241032	0.286566	0.167552	0.0631961	0.216557	0.101645	0.0504259	0.0920289	0.040717	0.0297837	0.16256	0.132266	0.0339122	0.117611	0.244791	0.267991	0.0149704	0.171543	0.0688376	0.086513	0.165837	0.114034	0.0585635	0.0120396	0.128229	0.187695	0.313263	0.36943	0.251282	0.114347	0.278147	0.123512	0.134433	0.189841	0.172854	0.124234	0.0213648	0.0561611	0.211477	0.176523
GSM2334416_9376537113_R01C02	74	0.213388	0.0217436	0.0500932	0.0424959	0.138032	0.108682	0.129103	0.0399621	0.246286	0.301738	0.153989	0.0507107	0.262591	0.136785	0.0467703	0.0834597	0.042831	0.0238709	0.324165	0.110045	0.091498	0.0731665	0.327093	0.34457	0.0450033	0.245197	0.114641	0.153437	0.21244	0.145532	0.130016	0.0239146	0.125518	0.291409	0.453956	0.378122	0.495422	0.0898384	0.344453	0.15647	0.198842	0.27394	0.183818	0.115723	0.0392249	0.11526	0.130548	0.10295
GSM2334448_9379082102_R05C02	74	0.200107	0.0163315	0.050191	0.0310606	0.151749	0.169618	0.0700576	0.0280604	0.238676	0.269373	0.152053	0.0457493	0.184357	0.0868351	0.0663207	0.0873728	0.031281	0.0284672	0.2059	0.0461327	0.0377913	0.10468	0.233036	0.21942	0.0670284	0.167702	0.0243341	0.142784	0.171881	0.131848	0.0399405	0.0264768	0.0836119	0.112168	0.375994	0.431671	0.348799	0.0896402	0.34523	0.149369	0.155115	0.203641	0.0614725	0.124135	0.0278064	0.0507969	0.142124	0.102039
GSM2334507_7766148053_R06C01	74	0.197126	0.0131651	0.0277497	0.0149564	0.0877623	0.130654	0.0529225	0.0313333	0.183733	0.240756	0.0830096	0.0411665	0.171198	0.0815886	0.0435165	0.0879056	0.0433902	0.0225741	0.214765	0.0618587	0.0313358	0.0723486	0.19317	0.222736	0.0484089	0.16353	0.054396	0.0757546	0.162134	0.0720859	0.0725941	0.0340171	0.0977961	0.0858979	0.426836	0.310775	0.290632	0.0785329	0.303749	0.118178	0.125572	0.173529	0.0659939	0.135186	0.0173473	0.0470763	0.175591	0.129051
GSM2334515_9376561048_R04C01	74	0.0963343	0.015836	0.0146703	0.0212528	0.0309753	0.0507951	0.080168	0.0159592	0.157597	0.190102	0.100973	0.035137	0.133971	0.0519802	0.0412533	0.0842939	0.0306758	0.025643	0.161559	0.0463761	0.0404774	0.0419614	0.131556	0.0933956	0.0448078	0.0791629	0.0307683	0.0626596	0.138214	0.029349	0.0365761	0.0291747	0.0693963	0.0650318	0.187161	0.15804	0.194335	0.0344052	0.145479	0.0795539	0.0548834	0.0922041	0.0286737	0.0658038	0.0200514	0.0340744	0.11752	0.0742231
GSM2334594_7766148103_R06C02	74	0.161453	0.0206034	0.018426	0.031974	0.0605507	0.119667	0.0606568	0.0221754	0.188493	0.188567	0.0965395	0.037618	0.172961	0.0862179	0.056101	0.0534103	0.0510204	0.0170435	0.158158	0.0547805	0.0200845	0.0856377	0.251382	0.251929	0.0696501	0.13457	0.0664924	0.102208	0.154896	0.0943759	0.0531552	0.0173054	0.104057	0.13896	0.384023	0.329784	0.331297	0.0708345	0.281237	0.103312	0.0877152	0.233046	0.0801582	0.113722	0.0297619	0.0486135	0.14861	0.0908662
GSM2334628_7512551003_R03C01	74	0.183665	0.0143185	0.0193665	0.0302247	0.0498261	0.0655924	0.0506921	0.0265244	0.156835	0.188481	0.0747255	0.0455124	0.0667965	0.0904854	0.0406681	0.059416	0.0178225	0.0150178	0.164073	0.0556309	0.0254954	0.0815551	0.210515	0.254375	0.0434783	0.0954468	0.0569436	0.0598802	0.181908	0.0678935	0.0379353	0.0252476	0.0916769	0.105103	0.233585	0.2424	0.252527	0.0674952	0.217407	0.12035	0.14423	0.228556	0.0770014	0.0888731	0.0174428	0.0366326	0.157861	0.190772
GSM2334019_7766148057_R01C02	73	0.0933343	0.0148699	0.0144152	0.0303985	0.035904	0.0675518	0.093985	0.0223994	0.0987439	0.20791	0.0661417	0.0506207	0.0584425	0.0587793	0.025367	0.0620115	0.0247026	0.0140939	0.0461354	0.0547295	0.0294159	0.0265833	0.12612	0.163473	0.0209371	0.0956188	0.0229581	0.0632953	0.16366	0.0325261	0.033945	0.0161512	0.0709276	0.0645535	0.291438	0.280405	0.127901	0.0714096	0.142024	0.120375	0.0712048	0.102292	0.0540926	0.140585	0.0178002	0.0331944	0.164011	0.173498
GSM2334088_7766148005_R01C01	73	0.177209	0.0240372	0.0242215	0.0202179	0.116841	0.141083	0.0450349	0.0300219	0.204954	0.187901	0.181785	0.0520841	0.1655	0.0879879	0.0484083	0.0680071	0.0357558	0.015283	0.184629	0.056911	0.0367468	0.0590752	0.246923	0.237734	0.0378676	0.143075	0.0709248	0.0572194	0.202217	0.0747097	0.0595688	0.0198288	0.100946	0.101767	0.399939	0.331065	0.331553	0.0768648	0.288591	0.111889	0.108849	0.146348	0.0709019	0.114617	0.0255431	0.0561145	0.166033	0.149051
GSM2334280_9379082102_R04C01	73	0.159394	0.013477	0.00832152	0.0389822	0.0649619	0.125873	0.10875	0.0330967	0.165256	0.278946	0.167692	0.0477101	0.268578	0.0583582	0.0498596	0.06453	0.0273614	0.0204067	0.103305	0.0565477	0.0381631	0.0656854	0.140223	0.109298	0.0320061	0.127754	0.0199146	0.0779168	0.212793	0.0597182	0.0745858	0.0303752	0.114013	0.161229	0.28076	0.403247	0.284202	0.0806349	0.319125	0.12743	0.190329	0.14551	0.0837967	0.0896458	0.0193572	0.0481405	0.182538	0.152196
GSM2334461_7766148122_R01C02	73	0.183933	0.0193709	0.0459568	0.0253753	0.132641	0.126008	0.0486748	0.0373422	0.188726	0.26292	0.125565	0.0526495	0.202219	0.0706279	0.0275452	0.084533	0.0215554	0.0231278	0.170318	0.0413669	0.0318442	0.0556213	0.256221	0.284148	0.0369686	0.160672	0.0224245	0.081701	0.17744	0.0585593	0.0593847	0.0274773	0.148733	0.167005	0.370434	0.330506	0.344775	0.0947046	0.28951	0.0991774	0.196314	0.194765	0.0954366	0.0930628	0.016715	0.0277654	0.151128	0.121086
GSM2334544_9376561015_R04C01	73	0.173473	0.0257563	0.053606	0.0160835	0.104904	0.142679	0.129818	0.038102	0.23863	0.257966	0.119323	0.0455974	0.203109	0.089681	0.0596728	0.0983607	0.0690355	0.0127273	0.280259	0.175006	0.0327048	0.0863018	0.306482	0.257616	0.0782489	0.177631	0.0568581	0.134325	0.172414	0.129393	0.104184	0.0256797	0.100543	0.137563	0.445517	0.376962	0.372388	0.124399	0.386363	0.156134	0.17533	0.232248	0.113683	0.114329	0.0260766	0.0737206	0.198548	0.124104
GSM2334596_7766148103_R04C02	73	0.161145	0.0288552	0.0328141	0.0371646	0.131198	0.0785416	0.087385	0.0404236	0.201002	0.132344	0.1602	0.0454964	0.31964	0.0692368	0.0364776	0.0805522	0.0330432	0.0175005	0.124213	0.0745679	0.0257341	0.103307	0.192056	0.208289	0.0578861	0.185679	0.0239495	0.0777869	0.187611	0.203582	0.0603954	0.0327281	0.12156	0.141661	0.342662	0.390574	0.274423	0.114275	0.314461	0.14241	0.160652	0.16077	0.0998967	0.0715203	0.0201049	0.0538645	0.221835	0.197416
GSM2334614_7512551003_R02C02	73	0.16764	0.0165072	0.0183155	0.032394	0.164356	0.133618	0.0570608	0.0318232	0.21058	0.143491	0.0839848	0.0387247	0.352431	0.0756023	0.0481332	0.0926035	0.0407702	0.0167173	0.160129	0.0689572	0.0691499	0.0783994	0.20597	0.247389	0.0343489	0.156833	0.0622632	0.105202	0.1722	0.211006	0.0568345	0.0304229	0.126303	0.194386	0.373886	0.378434	0.340087	0.110251	0.311484	0.143176	0.177591	0.20853	0.0914011	0.132267	0.0203284	0.0436425	0.227471	0.203128
GSM2333901_9370847096_R05C02	72	0.101516	0.0382983	0.0125301	0.0328436	0.0546445	0.0658295	0.0804419	0.0560314	0.136238	0.315495	0.138093	0.0656384	0.101751	0.0715796	0.034715	0.0774949	0.0305494	0.0207671	0.140583	0.0743279	0.0322758	0.0639326	0.146843	0.116254	0.0384248	0.108299	0.0393427	0.0823008	0.168008	0.0301482	0.0523366	0.0252808	0.0739639	0.0589268	0.236955	0.274324	0.167907	0.0536811	0.238572	0.0940892	0.0531184	0.13434	0.0639699	0.122802	0.0327819	0.0531406	0.163106	0.130203
GSM2334084_9370847091_R04C01	72	0.237097	0.0255044	0.0173541	0.0308125	0.11845	0.178426	0.0801109	0.04267	0.24441	0.193111	0.0811569	0.0672389	0.256737	0.095087	0.0905209	0.100514	0.045669	0.0248292	0.298527	0.0855107	0.0473016	0.112386	0.277275	0.366277	0.0645136	0.234004	0.0678251	0.127369	0.185975	0.111913	0.128833	0.0368361	0.13045	0.179883	0.433526	0.440946	0.444586	0.137376	0.404388	0.163211	0.201202	0.236435	0.119144	0.173097	0.0285787	0.06516	0.170169	0.152791
GSM2334091_7766148058_R05C02	72	0.164769	0.0227131	0.0208262	0.0260693	0.0637852	0.135057	0.0796731	0.0229611	0.228089	0.212269	0.121409	0.0379611	0.123995	0.0557301	0.0469576	0.0730878	0.0521015	0.0155437	0.161415	0.0706819	0.0381288	0.0538609	0.233419	0.112629	0.0549427	0.141095	0.0474621	0.0843121	0.154592	0.0753602	0.062252	0.0276298	0.0715649	0.115429	0.259517	0.349025	0.243021	0.0813188	0.244671	0.0986444	0.113359	0.1201	0.0672963	0.109585	0.027773	0.0301435	0.137889	0.122709
GSM2334132_7766148005_R02C02	72	0.13807	0.051259	0.0248235	0.0217995	0.0962775	0.0986574	0.0610075	0.035754	0.190783	0.155563	0.126554	0.0535406	0.179525	0.0986585	0.0470182	0.0935368	0.0232177	0.0340365	0.214478	0.15678	0.0442204	0.0823418	0.215895	0.294306	0.0294094	0.196175	0.0551521	0.0607869	0.17128	0.104115	0.0688815	0.0240008	0.155482	0.132503	0.35314	0.385484	0.294934	0.113676	0.270408	0.121734	0.115374	0.218213	0.0954015	0.143759	0.0200831	0.041957	0.196638	0.138124
GSM2334224_9376538150_R05C02	72	0.0757094	0.0201384	0.0148407	0.0235572	0.0373001	0.0301435	0.144663	0.0151423	0.171953	0.262433	0.0792764	0.0380365	0.119375	0.0464044	0.0521873	0.0471032	0.0308316	0.0149764	0.0733211	0.0600495	0.0147511	0.0649368	0.0838176	0.103254	0.0692027	0.0877494	0.0257518	0.0915637	0.162502	0.0276331	0.0372337	0.020574	0.0420453	0.034354	0.314037	0.171596	0.298522	0.0423724	0.107824	0.105016	0.0463313	0.115829	0.0317556	0.053705	0.0272705	0.0660314	0.0891627	0.0719352
GSM2334259_9379082108_R06C01	72	0.118351	0.0273331	0.00798621	0.0286319	0.0794827	0.128398	0.0910504	0.0426116	0.140173	0.253805	0.151937	0.0490847	0.12266	0.0761037	0.0530548	0.0772194	0.0250668	0.0223572	0.182535	0.107936	0.0239382	0.0470158	0.168845	0.257122	0.0277685	0.152899	0.0944167	0.0700698	0.160186	0.0688852	0.0529362	0.0187524	0.0841334	0.0788108	0.384851	0.290092	0.188151	0.0796822	0.258621	0.0908628	0.197177	0.134342	0.071431	0.148812	0.0287191	0.0430795	0.176316	0.18203
GSM2334373_9370847124_R03C01	72	0.0885333	0.0238802	0.0232779	0.0415114	0.0262103	0.0752264	0.0941361	0.0231473	0.10781	0.174736	0.0869281	0.0550124	0.0446497	0.0398801	0.0129338	0.0400862	0.0314836	0.0278836	0.0813609	0.0504389	0.0133721	0.0310452	0.0658069	0.0623026	0.0429792	0.0722604	0.0442608	0.0731252	0.170585	0.0151791	0.0391618	0.0129569	0.0971804	0.0356964	0.198571	0.137085	0.117612	0.0863026	0.134182	0.0998776	0.0483133	0.0661781	0.0475824	0.13184	0.0275887	0.0442133	0.157254	0.133369
GSM2334440_7766148041_R05C01	72	0.203225	0.0116032	0.0448043	0.0327266	0.0820805	0.128539	0.0909519	0.0278061	0.257089	0.231613	0.108964	0.0601574	0.187598	0.100364	0.0504912	0.115419	0.0333154	0.0188991	0.183157	0.0484028	0.0435169	0.0887124	0.244645	0.272149	0.0195431	0.169989	0.0605512	0.0849679	0.171111	0.075852	0.0802118	0.0282849	0.116975	0.0870012	0.349656	0.35429	0.341024	0.0728631	0.322326	0.147199	0.102286	0.19958	0.108173	0.217438	0.0212353	0.0627617	0.258942	0.259361
GSM2334517_9376561048_R05C01	72	0.169505	0.0361696	0.032495	0.0326216	0.0799542	0.0972776	0.0452076	0.0225743	0.226368	0.242892	0.107435	0.0375665	0.260793	0.094742	0.0291916	0.113082	0.0501197	0.0258678	0.182539	0.0567884	0.0254664	0.100084	0.26618	0.24152	0.0624475	0.151821	0.0573977	0.0724786	0.19792	0.0987118	0.0794814	0.0245312	0.100098	0.0890715	0.350648	0.320412	0.332677	0.0629182	0.252572	0.112019	0.0844782	0.191628	0.0614774	0.104315	0.0238853	0.0683716	0.177047	0.11089
GSM2334600_7766148084_R03C01	72	0.21744	0.0222222	0.0206752	0.0412371	0.112233	0.101087	0.0835664	0.0238	0.248923	0.178524	0.122074	0.0600338	0.291691	0.0760712	0.0621222	0.0926059	0.0339242	0.0152585	0.18656	0.0923752	0.0545403	0.0661008	0.263928	0.275381	0.0388517	0.113788	0.0567476	0.109372	0.16539	0.119435	0.0481268	0.0219056	0.125281	0.129575	0.446963	0.35428	0.325825	0.10379	0.295704	0.136508	0.102375	0.256112	0.0688037	0.0943137	0.0205286	0.0474816	0.20145	0.20157
GSM2334631_7766148080_R04C02	72	0.121779	0.0234426	0.0153913	0.0333234	0.0598673	0.0986547	0.055314	0.0329849	0.137088	0.23967	0.118892	0.0421913	0.084951	0.0915845	0.0536597	0.102591	0.0319868	0.0240141	0.0804999	0.0524417	0.0330828	0.0543535	0.128083	0.197961	0.0274377	0.120936	0.0232383	0.0872429	0.159404	0.0311979	0.0390967	0.0314492	0.0790096	0.0875849	0.24341	0.212179	0.172727	0.0591776	0.218602	0.0842292	0.0922195	0.0860756	0.0606115	0.101205	0.0203898	0.0540182	0.166911	0.151962
GSM2333942_7766148114_R01C01	71	0.271298	0.0207175	0.0353895	0.0307754	0.109066	0.11676	0.0729665	0.0538757	0.257619	0.25516	0.0912134	0.0415116	0.214268	0.0939852	0.056622	0.0990092	0.0346345	0.0230073	0.376784	0.0781467	0.0387652	0.0768186	0.277825	0.30842	0.0476904	0.195485	0.132852	0.147135	0.218055	0.148164	0.0726733	0.0299343	0.1168	0.132609	0.423708	0.353455	0.359271	0.121846	0.385827	0.144099	0.0854988	0.218157	0.102224	0.0948928	0.017617	0.0522121	0.200277	0.175721
GSM2334005_9376538120_R03C01	71	0.124569	0.0224044	0.0236019	0.0319995	0.142687	0.139137	0.0667518	0.0508126	0.200908	0.160204	0.200774	0.0585375	0.171468	0.0781263	0.0263526	0.130369	0.0495135	0.018901	0.260638	0.108956	0.0462396	0.0751792	0.227367	0.277663	0.0355335	0.173482	0.0485756	0.0816264	0.209969	0.15039	0.0676378	0.023794	0.0975594	0.141249	0.435094	0.341577	0.308799	0.105231	0.257536	0.149119	0.118517	0.150143	0.161557	0.111005	0.0282463	0.0656774	0.127986	0.0874204
GSM2334065_9370847081_R03C02	71	0.182383	0.0290474	0.0402268	0.0429663	0.21272	0.146561	0.101202	0.046863	0.173376	0.173384	0.0968409	0.0531411	0.294773	0.0672978	0.0267333	0.0816137	0.056727	0.0228104	0.199106	0.100283	0.0420407	0.0815259	0.179898	0.321069	0.0745385	0.188056	0.0496529	0.109732	0.171213	0.178971	0.0646798	0.026688	0.102325	0.127247	0.391195	0.246642	0.368946	0.143425	0.322975	0.0971969	0.2373	0.113189	0.0694807	0.17286	0.0202647	0.0671607	0.162698	0.112251
GSM2334142_9370847063_R02C02	71	0.118077	0.0187704	0.0115868	0.0349097	0.0666282	0.155903	0.0784661	0.0406344	0.196339	0.226238	0.153642	0.0651399	0.170976	0.0831663	0.0589391	0.0952301	0.0208919	0.0176608	0.147562	0.0697202	0.0410414	0.0625888	0.21045	0.217568	0.0446444	0.15069	0.0705181	0.0977976	0.170974	0.0727111	0.10196	0.0296108	0.112164	0.104914	0.322529	0.389306	0.346421	0.103833	0.272827	0.141222	0.240203	0.156649	0.0718647	0.151483	0.0255276	0.0423565	0.126763	0.132575
GSM2334161_9370847092_R05C01	71	0.0895384	0.0183719	0.0247729	0.0360443	0.0709064	0.0816791	0.0597989	0.0271874	0.147328	0.114475	0.0955799	0.0492278	0.0646867	0.081631	0.0529772	0.0891015	0.038026	0.0223034	0.174991	0.0568448	0.027654	0.0830953	0.206503	0.120171	0.0468326	0.116057	0.0837505	0.1065	0.175723	0.0464679	0.0553543	0.0248097	0.0770958	0.0963507	0.25472	0.336356	0.292756	0.0957447	0.198102	0.096899	0.0877342	0.142769	0.0400268	0.172705	0.0261606	0.0467046	0.129653	0.116615
GSM2334189_9376561035_R04C02	71	0.137105	0.0322999	0.0263735	0.0212937	0.0942004	0.0800288	0.094247	0.0274564	0.14278	0.315437	0.108471	0.0547614	0.117515	0.082871	0.0546239	0.0807281	0.0246859	0.0150097	0.108552	0.0439604	0.0442021	0.0365835	0.261399	0.350921	0.0290474	0.152154	0.0227796	0.239431	0.171875	0.049343	0.198764	0.0230105	0.112301	0.0886806	0.3646	0.273978	0.399521	0.0701392	0.239847	0.0843684	0.156212	0.158901	0.0809446	0.0830237	0.034172	0.0557298	0.288549	0.178776
GSM2334193_9379082151_R02C01	71	0.248396	0.0208532	0.111729	0.037408	0.0348671	0.1652	0.0712235	0.0312391	0.161359	0.246908	0.230946	0.0630236	0.236781	0.100917	0.0507481	0.146919	0.0300982	0.0135791	0.246291	0.106079	0.041328	0.0929875	0.263164	0.325433	0.0578239	0.254952	0.0828079	0.216761	0.212408	0.0669394	0.109781	0.0283782	0.175725	0.149194	0.468693	0.391383	0.33652	0.0984772	0.385437	0.187465	0.166091	0.250923	0.108301	0.213126	0.0255356	0.0931748	0.154111	0.193433
GSM2334230_9376538120_R02C02	71	0.172527	0.0167489	0.0195074	0.0317005	0.0483631	0.0674245	0.0773988	0.0737487	0.119748	0.204378	0.105418	0.0491299	0.222389	0.0816723	0.0424295	0.0586117	0.0416087	0.0176713	0.16439	0.040993	0.023602	0.0599278	0.114379	0.176033	0.0481583	0.0960608	0.0321149	0.0964413	0.200049	0.0738972	0.0410492	0.0299596	0.0943187	0.0616539	0.269727	0.231408	0.258813	0.041711	0.188926	0.111087	0.0347218	0.109905	0.0500894	0.0757165	0.0203053	0.0561187	0.184894	0.135322
GSM2334318_9379082152_R01C02	71	0.207393	0.0136635	0.102232	0.0349141	0.136978	0.115458	0.106417	0.032735	0.224325	0.242747	0.110639	0.036428	0.265108	0.111317	0.0666222	0.0901225	0.0311068	0.0113018	0.299025	0.102484	0.0385375	0.107018	0.26715	0.32951	0.0605933	0.175134	0.0789708	0.16002	0.193252	0.12838	0.108841	0.0229256	0.11978	0.194286	0.430845	0.442231	0.440557	0.0947302	0.367385	0.214547	0.188215	0.206423	0.113023	0.120605	0.0255895	0.0588723	0.158461	0.157624
GSM2334393_9370847124_R03C02	71	0.108848	0.0206638	0.0223939	0.036271	0.111706	0.108441	0.0893692	0.0289133	0.176074	0.20703	0.0867293	0.0431084	0.112192	0.0502996	0.0328544	0.0830157	0.0236894	0.0217376	0.109751	0.069968	0.0282251	0.0616309	0.11366	0.188085	0.0498174	0.0762554	0.0197819	0.0621399	0.189604	0.0261857	0.0570318	0.0306155	0.0765674	0.0802387	0.237527	0.190323	0.311683	0.0849338	0.275637	0.136572	0.140231	0.0989959	0.0506736	0.149362	0.022846	0.0682387	0.136265	0.121339
GSM2334442_9379082102_R04C02	71	0.240883	0.0293068	0.0535831	0.03362	0.265596	0.199683	0.110128	0.0720507	0.256135	0.247227	0.224689	0.0493856	0.261538	0.106106	0.0700826	0.110599	0.0247553	0.0374077	0.397368	0.12846	0.0422761	0.145991	0.290606	0.304905	0.0433406	0.165972	0.106353	0.198982	0.16508	0.175393	0.0993146	0.0411338	0.161222	0.195147	0.465139	0.408952	0.413271	0.139349	0.3532	0.211706	0.306514	0.221996	0.104912	0.153504	0.0273289	0.0821887	0.205229	0.189814
GSM2334457_7766148116_R06C02	71	0.153282	0.0256997	0.0399534	0.0262785	0.052973	0.0721609	0.0628499	0.0322391	0.185677	0.160593	0.0976978	0.0507246	0.225396	0.0844119	0.0277711	0.0512992	0.025313	0.0242806	0.170941	0.0845321	0.0291917	0.0506508	0.192446	0.247097	0.0309796	0.182153	0.0346343	0.0890309	0.14033	0.0697383	0.0559053	0.0355952	0.107634	0.0921203	0.3007	0.250371	0.287803	0.0756632	0.257835	0.084179	0.120058	0.11213	0.0971347	0.103342	0.0255999	0.0609098	0.163421	0.195796
GSM2334496_9376538092_R06C02	71	0.0649995	0.023801	0.0150775	0.0275179	0.0363031	0.049567	0.115205	0.0181024	0.19172	0.140352	0.159915	0.0526516	0.0733747	0.0939757	0.0634549	0.0693863	0.0605963	0.0278495	0.191211	0.0448822	0.0214905	0.0590442	0.147943	0.203831	0.131496	0.0904762	0.0328485	0.130014	0.161561	0.0262643	0.0384455	0.0311976	0.0644143	0.0512533	0.312759	0.21767	0.355206	0.0922992	0.17016	0.112169	0.112008	0.177998	0.066693	0.123664	0.020512	0.0633544	0.125876	0.123716
GSM2334570_7766148016_R06C02	71	0.153266	0.0212703	0.0341601	0.0219291	0.0503982	0.10776	0.040448	0.0220713	0.184158	0.211827	0.104997	0.0429644	0.116321	0.13207	0.0394865	0.10419	0.0199331	0.0160879	0.160366	0.0642642	0.0338592	0.0668092	0.24108	0.273334	0.0248874	0.134505	0.0651361	0.0874234	0.156205	0.0793456	0.0614649	0.0194914	0.10919	0.167333	0.415558	0.30409	0.288834	0.107667	0.331188	0.110434	0.0783906	0.108873	0.142644	0.0853855	0.0204575	0.0375412	0.143793	0.113222
GSM2334006_7766148120_R03C01	70	0.128778	0.0127915	0.0108804	0.0289513	0.0762918	0.12845	0.0600438	0.0309528	0.167658	0.164103	0.0875209	0.0644984	0.227719	0.0747059	0.0269922	0.0763364	0.0148054	0.0176534	0.160161	0.0902759	0.0318855	0.0764482	0.186542	0.118884	0.028925	0.132079	0.046986	0.0871582	0.181157	0.10794	0.0674487	0.0273922	0.147642	0.113265	0.394398	0.289503	0.332505	0.0717695	0.270854	0.137154	0.097269	0.162535	0.0841221	0.0970801	0.0219786	0.0448408	0.199889	0.181674
GSM2334129_7766148114_R06C02	70	0.123513	0.0166507	0.0210055	0.0257022	0.118703	0.0704813	0.0423565	0.0294768	0.214868	0.179984	0.0728988	0.0580073	0.187447	0.0407541	0.0565497	0.066297	0.0421851	0.00810673	0.0983359	0.0532237	0.0247534	0.0451917	0.162654	0.23497	0.0255828	0.138484	0.0629131	0.0544768	0.14759	0.0684532	0.0508196	0.0272093	0.110978	0.0660705	0.26851	0.304815	0.252594	0.0695426	0.210766	0.139809	0.0732226	0.168427	0.0489309	0.0907393	0.0198964	0.0485472	0.157166	0.0963171
GSM2334164_7766148084_R06C02	70	0.112429	0.0236954	0.0153788	0.0282048	0.0378666	0.125667	0.0513919	0.0147187	0.153084	0.229452	0.141971	0.0877574	0.0767302	0.0688187	0.024202	0.0548126	0.0219554	0.0206176	0.113005	0.0706408	0.0227703	0.0797581	0.0798096	0.191757	0.0309816	0.117474	0.0215179	0.0395835	0.183297	0.0266124	0.0380124	0.0201103	0.0734728	0.0785884	0.347152	0.234083	0.178271	0.0618838	0.172333	0.106346	0.125964	0.173868	0.0957674	0.123804	0.0205066	0.0402804	0.185869	0.175553
GSM2334261_9379082108_R01C02	70	0.327478	0.0447444	0.0593876	0.0330647	0.100916	0.254752	0.166638	0.0781764	0.305325	0.243306	0.0790402	0.0600532	0.262343	0.127998	0.172681	0.137013	0.0427372	0.0216106	0.446128	0.109256	0.0674473	0.0826912	0.36076	0.278098	0.122278	0.268647	0.0863114	0.126883	0.217239	0.0748691	0.18977	0.047175	0.142947	0.212331	0.523326	0.480042	0.520416	0.169354	0.396446	0.118936	0.244523	0.297923	0.175478	0.236419	0.0194897	0.0429387	0.189699	0.120035
GSM2334290_9376561035_R04C01	70	0.143937	0.0189513	0.0299759	0.0307349	0.197239	0.113225	0.130419	0.242189	0.193788	0.20462	0.213465	0.0443031	0.11793	0.0743535	0.0715534	0.120376	0.0308063	0.0119141	0.25471	0.0949357	0.0310908	0.0445512	0.243027	0.27664	0.0337669	0.106915	0.0522451	0.0950504	0.192586	0.104704	0.0838435	0.0378883	0.135454	0.119947	0.445683	0.355743	0.363262	0.0689262	0.344686	0.119785	0.130012	0.223067	0.212688	0.128519	0.0265182	0.0917952	0.193843	0.208004
GSM2334301_7766148002_R05C02	70	0.156389	0.017513	0.0352371	0.0259413	0.166852	0.151284	0.075423	0.0450933	0.22115	0.237323	0.153456	0.043712	0.156419	0.0835454	0.0514819	0.126992	0.0254083	0.0237502	0.25697	0.0984803	0.0323755	0.0799772	0.268227	0.266715	0.0263302	0.18434	0.0497385	0.154645	0.157428	0.151737	0.0734204	0.0162436	0.109389	0.195481	0.383943	0.380036	0.350424	0.0959634	0.333363	0.137752	0.157924	0.156802	0.0886405	0.155622	0.0180958	0.0594097	0.19414	0.215231
GSM2334314_9376538120_R04C02	70	0.104879	0.0161917	0.0176406	0.0285624	0.0688972	0.0850554	0.110581	0.0233779	0.143949	0.202306	0.085844	0.0339908	0.117591	0.0863444	0.0335491	0.112596	0.0356442	0.0230171	0.142794	0.0600505	0.0292104	0.0593537	0.177337	0.160186	0.0527143	0.105709	0.0306839	0.0728775	0.172851	0.0419944	0.0641126	0.0263063	0.0794216	0.0807969	0.299747	0.262196	0.239097	0.0788703	0.184645	0.139148	0.147933	0.108836	0.0644955	0.0981772	0.0258692	0.057177	0.147963	0.10838
GSM2334404_9376538092_R06C01	70	0.116139	0.0370481	0.0203119	0.0179087	0.0643897	0.100028	0.154682	0.018462	0.223083	0.19687	0.14669	0.0484381	0.0946484	0.0696427	0.0399952	0.0839344	0.0543912	0.030667	0.124806	0.0532512	0.0175681	0.0623745	0.113831	0.102341	0.140785	0.10986	0.0292533	0.0903421	0.149604	0.10271	0.0490645	0.0335865	0.0772013	0.0579251	0.268818	0.333555	0.170694	0.0751382	0.218555	0.0866624	0.0823986	0.09615	0.0841571	0.10221	0.0227315	0.0719337	0.161601	0.124662
GSM2334478_7766148061_R03C01	70	0.163825	0.0226246	0.0420059	0.0440154	0.0349556	0.0893904	0.0819741	0.0306814	0.190511	0.201699	0.120923	0.0582049	0.139392	0.0570134	0.0434886	0.0989098	0.029728	0.0273374	0.12102	0.0860286	0.0267079	0.0523398	0.175292	0.144622	0.0313264	0.0948706	0.0435878	0.0781989	0.180427	0.0566278	0.0338913	0.0269782	0.119822	0.0992717	0.343248	0.276617	0.304117	0.0885563	0.275046	0.141805	0.0901875	0.142219	0.134659	0.111401	0.022643	0.0483807	0.224831	0.202793
GSM2334499_9376561056_R03C01	70	0.0825033	0.0569199	0.0313723	0.0206855	0.0722747	0.0820144	0.102098	0.0282472	0.150211	0.239021	0.115262	0.0492472	0.0702825	0.0669704	0.0807275	0.0670226	0.0304686	0.0478134	0.128275	0.0818356	0.0209349	0.0616026	0.124364	0.215798	0.0906547	0.0895925	0.0447151	0.0948431	0.196691	0.0587464	0.0493354	0.035082	0.0502952	0.0776063	0.318375	0.224941	0.164981	0.0541239	0.179591	0.0973451	0.0961866	0.137074	0.185258	0.0767314	0.0212671	0.0521975	0.186181	0.151993
GSM2334538_7766148016_R03C02	70	0.159901	0.0177452	0.0365105	0.0201021	0.0638754	0.105756	0.0413735	0.0153027	0.182059	0.168651	0.0464045	0.0451022	0.170334	0.0500367	0.0281389	0.0642423	0.0140668	0.0161557	0.101077	0.0637468	0.0323088	0.0471816	0.192195	0.300779	0.0224891	0.132968	0.0364724	0.0459886	0.176394	0.0486795	0.0589692	0.0266121	0.0897344	0.0898958	0.318513	0.261305	0.305499	0.0516467	0.271559	0.0768768	0.0668124	0.191206	0.0568904	0.10151	0.0144637	0.0340145	0.142898	0.128961
GSM2334568_7766148016_R03C01	70	0.275689	0.010912	0.0392527	0.0253958	0.0533746	0.141006	0.0328103	0.0384686	0.333486	0.221529	0.131783	0.0459218	0.241427	0.0951108	0.0628426	0.124738	0.0269905	0.0203866	0.281295	0.0785826	0.044263	0.0922402	0.356114	0.325381	0.024782	0.178527	0.0689139	0.101786	0.163486	0.09999	0.102053	0.0231687	0.155034	0.194216	0.435535	0.33184	0.446987	0.104041	0.410806	0.127815	0.102499	0.198212	0.0887189	0.115153	0.0147518	0.0514974	0.125694	0.11687
GSM2334586_7766148061_R06C02	70	0.216716	0.0198052	0.0181623	0.0419514	0.117606	0.184293	0.0599923	0.0413335	0.242471	0.164116	0.190928	0.0603001	0.307149	0.0773874	0.0320135	0.123077	0.0391185	0.0199052	0.257396	0.0601666	0.0706861	0.199921	0.292363	0.211308	0.0322338	0.228881	0.0309567	0.204026	0.247176	0.190631	0.188418	0.031164	0.112308	0.139909	0.51727	0.295287	0.450053	0.0813252	0.308966	0.144226	0.139204	0.265746	0.0621391	0.150814	0.0232548	0.0816257	0.218882	0.190353
GSM2334598_7766148084_R05C01	70	0.113004	0.0163567	0.0194388	0.0276048	0.0617393	0.0595704	0.0579602	0.0238265	0.143134	0.291603	0.117627	0.0608175	0.16199	0.0606796	0.049552	0.0722522	0.0355297	0.0156861	0.12336	0.0509024	0.0364717	0.0678185	0.131314	0.157819	0.038251	0.164841	0.0406149	0.13184	0.152968	0.0742483	0.0456297	0.0293002	0.0705763	0.095098	0.283976	0.300291	0.345882	0.0627869	0.265536	0.0871382	0.169689	0.113052	0.053436	0.12374	0.0228926	0.0381602	0.160527	0.1474
GSM2334630_7766148080_R06C02	70	0.107348	0.0251203	0.0145229	0.0271563	0.0647557	0.0837726	0.101897	0.0439136	0.136944	0.136229	0.14274	0.0422956	0.1542	0.0793339	0.0283198	0.0929855	0.0380572	0.032568	0.128482	0.10141	0.027531	0.0825376	0.183219	0.176353	0.0557494	0.135329	0.0571226	0.126928	0.215519	0.0913695	0.0520566	0.0424562	0.102926	0.149247	0.347425	0.378241	0.338001	0.0916639	0.269466	0.123886	0.15759	0.237512	0.113432	0.178947	0.0262538	0.0509087	0.172428	0.134989
GSM2333937_7766148114_R03C01	69	0.315859	0.0281897	0.0347821	0.0236191	0.148208	0.185734	0.0588624	0.0438829	0.3131	0.286239	0.188337	0.0674033	0.266899	0.12319	0.0748567	0.162181	0.0534866	0.0171697	0.328299	0.0950735	0.0598494	0.107677	0.354932	0.370256	0.0623025	0.237034	0.0685278	0.144585	0.203791	0.139855	0.107281	0.0312881	0.16177	0.222242	0.487849	0.359622	0.412857	0.117659	0.400447	0.174598	0.125638	0.274311	0.0997554	0.227469	0.021897	0.0678272	0.175833	0.222287
GSM2333958_9370847096_R04C02	69	0.151594	0.0296475	0.0228461	0.0359008	0.0811039	0.132252	0.0709916	0.035274	0.193178	0.190318	0.194586	0.0543865	0.14745	0.0638957	0.0575011	0.068923	0.0300548	0.0219615	0.184463	0.0761236	0.0463409	0.0969257	0.185153	0.242662	0.0550436	0.147192	0.111676	0.0877434	0.216969	0.0617522	0.0616005	0.0480671	0.113856	0.0908764	0.347944	0.326508	0.30998	0.0997569	0.274759	0.139755	0.124291	0.14778	0.0958159	0.122303	0.0267251	0.0545246	0.146698	0.131026
GSM2334050_9370847091_R04C02	69	0.149827	0.0194085	0.031807	0.0330749	0.0343178	0.0815722	0.0715642	0.0280603	0.159338	0.154365	0.102034	0.0611053	0.111479	0.0674157	0.0267701	0.0611146	0.0211617	0.022425	0.131837	0.0661491	0.026262	0.0440955	0.108081	0.10696	0.0491428	0.101862	0.0899785	0.0839214	0.162988	0.0636415	0.046344	0.0159068	0.0774947	0.0616655	0.158699	0.199435	0.132319	0.0722455	0.193974	0.111	0.0625544	0.113292	0.0647601	0.0963763	0.0300545	0.0499106	0.112061	0.104083
[truncated: 1,290 more rows]
[truncated: 581 more columns]

## Sheet: Fig.1d
Normal-NADJ breast dataset	N/NADJ	Age	cg23062112	cg07365816	cg08659394	cg14575559	cg18560328	cg21229268	cg23091824	cg03865257	cg11250773	cg12892303	cg12781700	cg13583934	cg12065366	cg25203031	cg17404915	cg22299454	cg05404701	cg24010885	cg17712694	cg20707222	cg11297107	cg12799781	cg01718742	cg10263370	cg15774465	cg16491617	cg11832210	cg07686635	cg26510017	cg15745900	cg15402399	cg06963053	cg05009934	cg10094616	cg06010588	cg23847712	cg17370163	cg13428480	cg22620221	cg22319311	cg16437728	cg25984671	cg07882671	cg04342955	cg15759616	cg07624639	cg14482313
[truncated: 92 more rows]
[truncated: 324 more columns]

[truncated: 11 more sheets: Fig.2abcd, Fig.2e, Fig.2fgh, Fig.3a, Fig.3bcde, Fig4a, Fig4b, Fig4c, Fig4d, Fig5abcd, Fig5efgh]
